# Supplementary material for: Insights into Common Octopus (Octopus vulgaris) Ink Proteome and Bioactive Peptides Using Proteomic Approaches
Source: MDPI journal article supplement (doi:10.3390/md21040206), 2023-03-24
Supplement: s1 [file s1]

Supplementary File S6: MCL Clustered Ink Proteins and Descriptions

| <i>Clustering Method</i> | <i>Cluster Number</i> | <i>Cluster Color</i> | <i>Gene Count</i> | <i>Protein Name</i> | <i>Protein Identifier</i> | <i>Protein Description</i>                                                                                                                                                                   |
|--------------------------|-----------------------|----------------------|-------------------|---------------------|---------------------------|----------------------------------------------------------------------------------------------------------------------------------------------------------------------------------------------|
| MCL                      | 1                     | Red                  | 30                | Fabp                | 37653.A0A0L8FWZ8          | FABP domain-containing protein                                                                                                                                                               |
| MCL                      | 1                     | Red                  | 30                | OCBIM_22001106mg    | 37653.A0A0L8G3E3          | ATP-citrate synthase; In the C-terminal section; belongs to the succinate/malate CoA ligase alpha subunit family.                                                                            |
| MCL                      | 1                     | Red                  | 30                | OCBIM_22001700mg    | 37653.A0A0L8G235          | Malate dehydrogenase                                                                                                                                                                         |
| MCL                      | 1                     | Red                  | 30                | OCBIM_22003005mg    | 37653.A0A0L8G174          | 1,2-dihydroxy-3-keto-5-methylthiopentene dioxygenase; Catalyzes the formation of formate and 2-keto-4- methylthiobutyrate (KMTB) from 1,2-dihydroxy-3-keto-5-methylthiopentene (DHK-MTPene). |
| MCL                      | 1                     | Red                  | 30                | OCBIM_22005540mg    | 37653.A0A0L8FWW9          | Glyceraldehyde-3-phosphate dehydrogenase                                                                                                                                                     |
| MCL                      | 1                     | Red                  | 30                | OCBIM_22007559mg    | 37653.A0A0L8HS44          | ATP synthase subunit beta; Produces ATP from ADP in the presence of a proton gradient across the membrane.                                                                                   |
| MCL                      | 1                     | Red                  | 30                | OCBIM_22007620mg    | 37653.A0A0L8HTA6          | FBPase domain-containing protein; Belongs to the FBPase class 1 family.                                                                                                                      |
| MCL                      | 1                     | Red                  | 30                | OCBIM_22009426mg    | 37653.A0A0L8HPX8          | Uncharacterized protein                                                                                                                                                                      |
| MCL                      | 1                     | Red                  | 30                | OCBIM_22011519mg    | 37653.A0A0L8HM12          | Uncharacterized protein                                                                                                                                                                      |
| MCL                      | 1                     | Red                  | 30                | OCBIM_22012436mg    | 37653.A0A0L8HKW4          | Aconitate hydratase, mitochondrial; Belongs to the aconitase/IPM isomerase family.                                                                                                           |
| MCL                      | 1                     | Red                  | 30                | OCBIM_22013272mg    | 37653.A0A0L8HKK9          | Fructose-bisphosphate aldolase; Belongs to the class I fructose-bisphosphate aldolase family.                                                                                                |
| MCL                      | 1                     | Red                  | 30                | OCBIM_22014453mg    | 37653.A0A0L8IDR5          | Phosphoglycerate kinase                                                                                                                                                                      |
| MCL                      | 1                     | Red                  | 30                | OCBIM_22015943mg    | 37653.A0A0L8HGI4          | 6-phosphogluconolactonase; Hydrolysis of 6-phosphogluconolactone to 6-phosphogluconate.                                                                                                      |
| MCL                      | 1                     | Red                  | 30                | OCBIM_22016575mg    | 37653.A0A0L8HEP1          | Aspartate aminotransferase                                                                                                                                                                   |
| MCL                      | 1                     | Red                  | 30                | OCBIM_22018431mg    | 37653.A0A0L8ICW2          | Transaldolase; Transaldolase is important for the balance of metabolites in the pentose-phosphate pathway.                                                                                   |
| MCL                      | 1                     | Red                  | 30                | OCBIM_22020205mg    | 37653.A0A0L8H8S0          | Uncharacterized protein; Belongs to the LDH/MDH superfamily.                                                                                                                                 |
| MCL                      | 1                     | Red                  | 30                | OCBIM_22022789mg    | 37653.A0A0L8FFZ3          | Tyrosinase_Cu-bd domain-containing protein                                                                                                                                                   |

| MCL                      | 1                     | Red                  | 30                | OCBIM_22025350mg    | 37653.A0A0L8H0R2          | Clathrin-link domain-containing protein                                                                                                                                                                                           |
|--------------------------|-----------------------|----------------------|-------------------|---------------------|---------------------------|-----------------------------------------------------------------------------------------------------------------------------------------------------------------------------------------------------------------------------------|
| MCL                      | 1                     | Red                  | 30                | OCBIM_22026553mg    | 37653.A0A0L8IA05          | Uncharacterized protein; Belongs to the peptidase M18 family.                                                                                                                                                                     |
| <i>Clustering Method</i> | <i>Cluster Number</i> | <i>Cluster Color</i> | <i>Gene Count</i> | <i>Protein Name</i> | <i>Protein Identifier</i> | <i>Protein Description</i>                                                                                                                                                                                                        |
| MCL                      | 1                     | Red                  | 30                | OCBIM_22027353mg    | 37653.A0A0L8GV19          | Glucose-6-phosphate 1-dehydrogenase; Catalyzes the rate-limiting step of the oxidative pentose- phosphate pathway, which represents a route for the dissimilation of carbohydrates besides glycolysis.                            |
| MCL                      | 1                     | Red                  | 30                | OCBIM_22031231mg    | 37653.A0A0L8GMM5          | Ferritin; Stores iron in a soluble, non-toxic, readily available form. Important for iron homeostasis. Iron is taken up in the ferrous form and deposited as ferric hydroxides after oxidation. ; Belongs to the ferritin family. |
| MCL                      | 1                     | Red                  | 30                | OCBIM_22031609mg    | 37653.A0A0L8GLX8          | S-formylglutathione hydrolase; Serine hydrolase involved in the detoxification of formaldehyde.                                                                                                                                   |
| MCL                      | 1                     | Red                  | 30                | OCBIM_22031951mg    | 37653.A0A0L8GKM6          | Nucleoside diphosphate kinase                                                                                                                                                                                                     |
| MCL                      | 1                     | Red                  | 30                | OCBIM_22032473mg    | 37653.A0A0L8GJH5          | Pyruvate kinase; Belongs to the pyruvate kinase family.                                                                                                                                                                           |
| MCL                      | 1                     | Red                  | 30                | OCBIM_22035502mg    | 37653.A0A0L8GDJ1          | Uncharacterized protein                                                                                                                                                                                                           |
| MCL                      | 1                     | Red                  | 30                | OCBIM_22037419mg    | 37653.A0A0L8I2N5          | Triosephosphate isomerase                                                                                                                                                                                                         |
| MCL                      | 1                     | Red                  | 30                | OCBIM_22037603mg    | 37653.A0A0L8G9D6          | PKS_ER domain-containing protein                                                                                                                                                                                                  |
| MCL                      | 1                     | Red                  | 30                | OCBIM_22038393mg    | 37653.A0A0L8G7X1          | Uncharacterized protein                                                                                                                                                                                                           |
| MCL                      | 1                     | Red                  | 30                | OCBIM_22039086mg    | 37653.A0A0L8G7Y6          | Catalase domain-containing protein                                                                                                                                                                                                |
| MCL                      | 1                     | Red                  | 30                | OCBIM_22039213mg    | 37653.A0A0L8G7T8          | Iso_dh domain-containing protein                                                                                                                                                                                                  |
| MCL                      | 2                     | Brown                | 18                | OCBIM_22005008mg    | 37653.A0A0L8IH79          | Uncharacterized protein; Belongs to the chaperonin (HSP60) family.                                                                                                                                                                |
| MCL                      | 2                     | Brown                | 18                | OCBIM_22005110mg    | 37653.A0A0L8IFP8          | Superoxide dismutase [Cu-Zn]; Destroys radicals which are normally produced within the cells and which are toxic to biological systems. ; Belongs to the Cu-Zn superoxide dismutase family.                                       |
| MCL                      | 2                     | Brown                | 18                | OCBIM_22006581mg    | 37653.A0A0L8FWK7          | Uncharacterized protein; Belongs to the universal ribosomal protein uL22 family.                                                                                                                                                  |
| MCL                      | 2                     | Brown                | 18                | OCBIM_22013251mg    | 37653.A0A0L8FNH6          | Proteasome subunit beta                                                                                                                                                                                                           |
| MCL                      | 2                     | Brown                | 18                | OCBIM_22015514mg    | 37653.A0A0L8IEQ2          | T-complex protein 1 subunit delta                                                                                                                                                                                                 |
| MCL                      | 2                     | Brown                | 18                | OCBIM_22017212mg    | 37653.A0A0L8FKC8          | AAA domain-containing protein; Belongs to the AAA ATPase family.                                                                                                                                                                  |

| MCL                      | 2                     | Brown                | 18                | OCBIM_22018710mg    | 37653.A0A0L8HB35          | Uncharacterized protein                                                                                                                                                                                                                                                                                                                                                                                                                                                                                                                                                                        |
|--------------------------|-----------------------|----------------------|-------------------|---------------------|---------------------------|------------------------------------------------------------------------------------------------------------------------------------------------------------------------------------------------------------------------------------------------------------------------------------------------------------------------------------------------------------------------------------------------------------------------------------------------------------------------------------------------------------------------------------------------------------------------------------------------|
| MCL                      | 2                     | Brown                | 18                | OCBIM_22021443mg    | 37653.A0A0L8H7N1          | UBA domain-containing protein                                                                                                                                                                                                                                                                                                                                                                                                                                                                                                                                                                  |
| MCL                      | 2                     | Brown                | 18                | OCBIM_22022293mg    | 37653.A0A0L8H4W4          | Proteasome subunit alpha type                                                                                                                                                                                                                                                                                                                                                                                                                                                                                                                                                                  |
| MCL                      | 2                     | Brown                | 18                | OCBIM_22024200mg    | 37653.A0A0L8FF74          | AA_TRNA_LIGASE_II domain-containing protein                                                                                                                                                                                                                                                                                                                                                                                                                                                                                                                                                    |
| <i>Clustering Method</i> | <i>Cluster Number</i> | <i>Cluster Color</i> | <i>Gene Count</i> | <i>Protein Name</i> | <i>Protein Identifier</i> | <i>Protein Description</i>                                                                                                                                                                                                                                                                                                                                                                                                                                                                                                                                                                     |
| MCL                      | 2                     | Brown                | 18                | OCBIM_22024847mg    | 37653.A0A0L8H0K9          | Proteasome subunit alpha type                                                                                                                                                                                                                                                                                                                                                                                                                                                                                                                                                                  |
| MCL                      | 2                     | Brown                | 18                | OCBIM_22025440mg    | 37653.A0A0L8GZ36          | Uncharacterized protein                                                                                                                                                                                                                                                                                                                                                                                                                                                                                                                                                                        |
| MCL                      | 2                     | Brown                | 18                | OCBIM_22027429mg    | 37653.A0A0L8GUX3          | Uncharacterized protein; Belongs to the universal ribosomal protein uL3 family.                                                                                                                                                                                                                                                                                                                                                                                                                                                                                                                |
| MCL                      | 2                     | Brown                | 18                | OCBIM_22029167mg    | 37653.A0A0L8GSS4          | AAA domain-containing protein; Belongs to the AAA ATPase family.                                                                                                                                                                                                                                                                                                                                                                                                                                                                                                                               |
| MCL                      | 2                     | Brown                | 18                | OCBIM_22036340mg    | 37653.A0A0L8GBS0          | PCI domain-containing protein                                                                                                                                                                                                                                                                                                                                                                                                                                                                                                                                                                  |
| MCL                      | 2                     | Brown                | 18                | OCBIM_22036439mg    | 37653.A0A0L8GBA9          | 26S proteasome non-ATPase regulatory subunit 2; Component of the 26S proteasome, a multiprotein complex involved in the ATP-dependent degradation of ubiquitinated proteins. This complex plays a key role in the maintenance of protein homeostasis by removing misfolded or damaged proteins, which could impair cellular functions, and by removing proteins whose functions are no longer required. Therefore, the proteasome participates in numerous cellular processes, including cell cycle progression, apoptosis, or DNA damage repair; Belongs to the proteasome subunit S2 family. |
| MCL                      | 2                     | Brown                | 18                | OCBIM_22036500mg    | 37653.A0A0L8GCM1          | Uncharacterized protein                                                                                                                                                                                                                                                                                                                                                                                                                                                                                                                                                                        |
| MCL                      | 2                     | Brown                | 18                | OCBIM_22037121mg    | 37653.A0A0L8I420          | Uncharacterized protein                                                                                                                                                                                                                                                                                                                                                                                                                                                                                                                                                                        |
| MCL                      | 3                     | Dark Golden Rod      | 7                 | OCBIM_22000521mg    | 37653.A0A0L8HZY4          | Fumarylacetoacetase                                                                                                                                                                                                                                                                                                                                                                                                                                                                                                                                                                            |
| MCL                      | 3                     | Dark Golden Rod      | 7                 | OCBIM_22003650mg    | 37653.A0A0L8FZK6          | ADH_zinc_N domain-containing protein                                                                                                                                                                                                                                                                                                                                                                                                                                                                                                                                                           |
| MCL                      | 3                     | Dark Golden Rod      | 7                 | OCBIM_22008553mg    | 37653.A0A0L8FTG9          | Amine oxidase                                                                                                                                                                                                                                                                                                                                                                                                                                                                                                                                                                                  |
| MCL                      | 3                     | Dark Golden Rod      | 7                 | OCBIM_22008657mg    | 37653.A0A0L8HQM9          | Uncharacterized protein; Belongs to the short-chain dehydrogenases/reductases (SDR) family.                                                                                                                                                                                                                                                                                                                                                                                                                                                                                                    |

| MCL                      | 3                     | Dark Golden Rod      | 7                 | OCBIM_22023716mg    | 37653.A0A0L8FFE9          | Uncharacterized protein                                                                                                                                                                                                                                                      |
|--------------------------|-----------------------|----------------------|-------------------|---------------------|---------------------------|------------------------------------------------------------------------------------------------------------------------------------------------------------------------------------------------------------------------------------------------------------------------------|
| MCL                      | 3                     | Dark Golden Rod      | 7                 | OCBIM_22036170mg    | 37653.A0A0L8GC14          | ACPS domain-containing protein                                                                                                                                                                                                                                               |
| MCL                      | 3                     | Dark Golden Rod      | 7                 | OCBIM_22037270mg    | 37653.A0A0L8GAD8          | Uncharacterized protein; Belongs to the GST superfamily.                                                                                                                                                                                                                     |
| MCL                      | 4                     | Yellow               | 7                 | OCBIM_22005448mg    | 37653.A0A0L8HW02          | Uncharacterized protein                                                                                                                                                                                                                                                      |
| MCL                      | 4                     | Yellow               | 7                 | OCBIM_22022828mg    | 37653.A0A0L8H417          | Glucose-6-phosphate isomerase; Belongs to the GPI family.                                                                                                                                                                                                                    |
| MCL                      | 4                     | Yellow               | 7                 | OCBIM_22024348mg    | 37653.A0A0L8H1I1          | Xylose isomerase                                                                                                                                                                                                                                                             |
| <i>Clustering Method</i> | <i>Cluster Number</i> | <i>Cluster Color</i> | <i>Gene Count</i> | <i>Protein Name</i> | <i>Protein Identifier</i> | <i>Protein Description</i>                                                                                                                                                                                                                                                   |
| MCL                      | 4                     | Yellow               | 7                 | OCBIM_22026276mg    | 37653.A0A0L8GXA0          | Glucosamine-6-phosphate isomerase                                                                                                                                                                                                                                            |
| MCL                      | 4                     | Yellow               | 7                 | OCBIM_22028783mg    | 37653.A0A0L8GS34          | Uncharacterized protein                                                                                                                                                                                                                                                      |
| MCL                      | 4                     | Yellow               | 7                 | OCBIM_22032752mg    | 37653.A0A0L8GJ57          | Ribokinase; Catalyzes the phosphorylation of ribose at O-5 in a reaction requiring ATP and magnesium. The resulting D-ribose-5-phosphate can then be used either for sythesis of nucleotides, histidine, and tryptophan, or as a component of the pentose phosphate pathway. |
| MCL                      | 4                     | Yellow               | 7                 | OCBIM_22037884mg    | 37653.A0A0L8G8V0          | Phosphomannomutase; Involved in the synthesis of the GDP-mannose and dolichol- phosphate-mannose required for a number of critical mannosyl transfer reactions.                                                                                                              |
| MCL                      | 5                     | Olive                | 4                 | OCBIM_22019212mg    | 37653.A0A0L8HAQ5          | Aldedh domain-containing protein; Belongs to the aldehyde dehydrogenase family.                                                                                                                                                                                              |
| MCL                      | 5                     | Olive                | 4                 | OCBIM_22024094mg    | 37653.A0A0L8H1Z7          | CN hydrolase domain-containing protein                                                                                                                                                                                                                                       |
| MCL                      | 5                     | Olive                | 4                 | OCBIM_22026800mg    | 37653.A0A0L8GW99          | Uncharacterized protein                                                                                                                                                                                                                                                      |
| MCL                      | 5                     | Olive                | 4                 | OCBIM_22030334mg    | 37653.A0A0L8GP20          | Aldehyde dehydrogenase; Belongs to the aldehyde dehydrogenase family.                                                                                                                                                                                                        |
| MCL                      | 6                     | Green                | 4                 | OCBIM_22000781mg    | 37653.A0A0L8HZX3          | Arginase                                                                                                                                                                                                                                                                     |
| MCL                      | 6                     | Green                | 4                 | OCBIM_22019540mg    | 37653.A0A0L8H9P1          | Uncharacterized protein; Belongs to the ATP:guanido phosphotransferase family.                                                                                                                                                                                               |
| MCL                      | 6                     | Green                | 4                 | OCBIM_22022443mg    | 37653.A0A0L8H4W2          | Alpha-galactosidase                                                                                                                                                                                                                                                          |
| MCL                      | 6                     | Green                | 4                 | OCBIM_22036825mg    | 37653.A0A0L8GC35          | M20_dimer domain-containing protein                                                                                                                                                                                                                                          |
| MCL                      | 7                     | Green 2              | 4                 | OCBIM_22003270mg    | 37653.A0A0L8G0V9          | Uncharacterized protein; Belongs to the heat shock protein 70 family.                                                                                                                                                                                                        |

|                          |                       |                      |                   |                     |                           |                                                                                                                                                                                                                                                                                            |
|--------------------------|-----------------------|----------------------|-------------------|---------------------|---------------------------|--------------------------------------------------------------------------------------------------------------------------------------------------------------------------------------------------------------------------------------------------------------------------------------------|
| MCL                      | 7                     | Green 2              | 4                 | OCBIM_22026436mg    | 37653.A0A0L8GWN9          | Carboxypeptidase; Belongs to the peptidase S10 family.                                                                                                                                                                                                                                     |
| MCL                      | 7                     | Green 2              | 4                 | OCBIM_22027793mg    | 37653.A0A0L8I919          | Calreticulin                                                                                                                                                                                                                                                                               |
| MCL                      | 7                     | Green 2              | 4                 | OCBIM_22033046mg    | 37653.A0A0L8GJH1          | Uncharacterized protein; Belongs to the protein disulfide isomerase family.                                                                                                                                                                                                                |
| MCL                      | 8                     | Light Green          | 3                 | OCBIM_22003454mg    | 37653.A0A0L8G0I6          | 14_3_3 domain-containing protein; Belongs to the 14-3-3 family.                                                                                                                                                                                                                            |
| MCL                      | 8                     | Light Green          | 3                 | OCBIM_22009637mg    | 37653.A0A0L8FRZ6          | 14_3_3 domain-containing protein; Belongs to the 14-3-3 family.                                                                                                                                                                                                                            |
| MCL                      | 8                     | Light Green          | 3                 | OCBIM_22020713mg    | 37653.A0A0L8IDH2          | Protein kinase domain-containing protein; Belongs to the protein kinase superfamily.                                                                                                                                                                                                       |
| MCL                      | 9                     | Medium Sea Green     | 3                 | MYH                 | 37653.A0A0L8H7W7          | Uncharacterized protein                                                                                                                                                                                                                                                                    |
| MCL                      | 9                     | Medium Sea Green     | 3                 | OCBIM_22005155mg    | 37653.A0A0L8FYB6          | Uncharacterized protein                                                                                                                                                                                                                                                                    |
| MCL                      | 9                     | Medium Sea Green     | 3                 | OCBIM_22007563mg    | 37653.A0A0L8HS39          | Uncharacterized protein                                                                                                                                                                                                                                                                    |
| <b>Clustering Method</b> | <b>Cluster Number</b> | <b>Cluster Color</b> | <b>Gene Count</b> | <b>Protein Name</b> | <b>Protein Identifier</b> | <b>Protein Description</b>                                                                                                                                                                                                                                                                 |
| MCL                      | 10                    | Cyan                 | 2                 | OCBIM_22018475mg    | 37653.A0A0L8FIV0          | Uncharacterized protein                                                                                                                                                                                                                                                                    |
| MCL                      | 11                    | Medium Purple        | 2                 | OCBIM_22015214mg    | 37653.A0A0L8FLK6          | Cytidine deaminase; This enzyme scavenges exogenous and endogenous cytidine and 2'-deoxycytidine for UMP synthesis; Belongs to the cytidine and deoxycytidylate deaminase family.                                                                                                          |
| MCL                      | 11                    | Medium Purple        | 2                 | OCBIM_22032061mg    | 37653.A0A0L8GLL0          | Thymidine phosphorylase; Catalyzes the reversible phosphorolysis of thymidine. The produced molecules are then utilized as carbon and energy sources or in the rescue of pyrimidine bases for nucleotide synthesis. ; Belongs to the thymidine/pyrimidine-nucleoside phosphorylase family. |
| MCL                      | 12                    | Orchid               | 2                 | OCBIM_22027999mg    | 37653.A0A0L8GU71          | VOC domain-containing protein                                                                                                                                                                                                                                                              |
| MCL                      | 12                    | Orchid               | 2                 | hagh                | 37653.A0A0L8GMH9          | HAGH_C domain-containing protein                                                                                                                                                                                                                                                           |
| MCL                      | 13                    | Purple               | 2                 | OCBIM_22002474mg    | 37653.A0A0L8G0U4          | Serine hydroxymethyltransferase; Interconversion of serine and glycine. ; Belongs to the SHMT family.                                                                                                                                                                                      |
| MCL                      | 13                    | Purple               | 2                 | OCBIM_22031492mg    | 37653.A0A0L8GLQ4          | 10-formyltetrahydrofolate dehydrogenase; In the C-terminal section; belongs to the aldehyde dehydrogenase family. ALDH1L subfamily.                                                                                                                                                        |
| MCL                      | 14                    | Hot Pink             | 2                 | OCBIM_22002213mg    | 37653.A0A0L8G196          | NAD(P)-bd_dom domain-containing protein                                                                                                                                                                                                                                                    |

|     |    |          |   |                  |                  |                                     |
|-----|----|----------|---|------------------|------------------|-------------------------------------|
| MCL | 14 | Hot Pink | 2 | OCBIM_22033873mg | 37653.A0A0L8GGM9 | Epimerase domain-containing protein |
| MCL | 15 | Pink     | 2 | OCBIM_22012269mg | 37653.A0A0L8HLB5 | Adenosylhomocysteinase              |
| MCL | 15 | Pink     | 2 | OCBIM_22035593mg | 37653.A0A0L8I4B3 | Uncharacterized protein             |
