# Supplementary material for: Insights into Common Octopus (Octopus vulgaris) Ink Proteome and Bioactive Peptides Using Proteomic Approaches
Source: MDPI journal article supplement (doi:10.3390/md21040206), 2023-03-24
Supplement: s1 [file s1]

**Supplementary File S5.** InterPro Motifs analysis of the *O. vulgaris* ink proteome by DAVID version 6.8.

| InterPro Motifs                                                 | GC | %   | p-Value                | InterPro Motifs                                                         | GC | %   | p-Value                |
|-----------------------------------------------------------------|----|-----|------------------------|-------------------------------------------------------------------------|----|-----|------------------------|
| GroES-like                                                      | 4  | 2.9 | $2.10 \times 10^{-04}$ | Tubulin/FtsZ, C-terminal                                                | 3  | 2.2 | $3.10 \times 10^{-02}$ |
| Aldolase-type TIM barrel                                        | 4  | 2.9 | $3.10 \times 10^{-03}$ | Calponin homology domain                                                | 3  | 2.2 | $3.10 \times 10^{-02}$ |
| TCP-1-like chaperonin intermediate domain                       | 3  | 2.2 | $3.30 \times 10^{-03}$ | ATPase, alpha/beta subunit, nucleotide-binding domain, active site      | 2  | 1.4 | $3.10 \times 10^{-02}$ |
| GroEL-like equatorial domain                                    | 3  | 2.2 | $3.90 \times 10^{-03}$ | ATPase, F1/V1/A1 complex, alpha/beta subunit, nucleotide-binding domain | 2  | 1.4 | $3.10 \times 10^{-02}$ |
| GroEL-like apical domain                                        | 3  | 2.2 | $4.60 \times 10^{-03}$ | ATPase, alpha/beta subunit, N-terminal                                  | 2  | 1.4 | $3.10 \times 10^{-02}$ |
| Chaperonin Cpn60/TCP-1                                          | 3  | 2.2 | $4.60 \times 10^{-03}$ | Tubulin                                                                 | 3  | 2.2 | $3.80 \times 10^{-02}$ |
| Proteasome, subunit alpha/beta                                  | 3  | 2.2 | $5.30 \times 10^{-03}$ | 26S proteasome subunit P45                                              | 2  | 1.4 | $3.90 \times 10^{-02}$ |
| ATPase, AAA-type, conserved site                                | 3  | 2.2 | $1.30 \times 10^{-02}$ | AAA+ ATPase domain                                                      | 4  | 2.9 | $4.00 \times 10^{-02}$ |
| ATPase, F1 complex beta subunit/V1 complex, C-terminal          | 2  | 1.4 | $1.60 \times 10^{-02}$ | ATPase, AAA-type, core                                                  | 3  | 2.2 | $4.20 \times 10^{-02}$ |
| Lactate/malate dehydrogenase, N-terminal                        | 2  | 1.4 | $1.60 \times 10^{-02}$ | Peptidase M20, dimerization domain                                      | 2  | 1.4 | $4.70 \times 10^{-02}$ |
| L-lactate/malate dehydrogenase                                  | 2  | 1.4 | $1.60 \times 10^{-02}$ | Peptidase M20                                                           | 2  | 1.4 | $4.70 \times 10^{-02}$ |
| Tubulin, conserved site                                         | 3  | 2.2 | $1.70 \times 10^{-02}$ | Proteasome, alpha-subunit, N-terminal domain                            | 2  | 1.4 | $4.70 \times 10^{-02}$ |
| Glutathione S-transferase, C-terminal                           | 3  | 2.2 | $1.80 \times 10^{-02}$ | Proteasome A-type subunit                                               | 2  | 1.4 | $5.40 \times 10^{-02}$ |
| Glutathione S-transferase, C-terminal-like                      | 3  | 2.2 | $2.10 \times 10^{-02}$ | Alcohol dehydrogenase GroES-like                                        | 2  | 1.4 | $5.40 \times 10^{-02}$ |
| Tubulin, C-terminal                                             | 3  | 2.2 | $2.20 \times 10^{-02}$ | SMP-30/Gluconolactonase/LRE-like region                                 | 2  | 1.4 | $5.40 \times 10^{-02}$ |
| Lactate/malate dehydrogenase, C-terminal                        | 2  | 1.4 | $2.40 \times 10^{-02}$ | Thioredoxin, conserved site                                             | 2  | 1.4 | $6.20 \times 10^{-02}$ |
| Glutathione S-transferase, omega-class                          | 2  | 1.4 | $2.40 \times 10^{-02}$ | Alcohol dehydrogenase, C-terminal                                       | 2  | 1.4 | $6.20 \times 10^{-02}$ |
| Glucosamine/galactosamine-6-phosphate isomerase                 | 2  | 1.4 | $2.40 \times 10^{-02}$ | Chaperonin TCP-1, conserved site                                        | 2  | 1.4 | $6.20 \times 10^{-02}$ |
| Smooth muscle protein/calponin                                  | 2  | 1.4 | $2.40 \times 10^{-02}$ | Chaperone tailless complex polypeptide 1 (TCP-1)                        | 2  | 1.4 | $6.20 \times 10^{-02}$ |
| Lactate dehydrogenase/glycoside hydrolase, family 4, C-terminal | 2  | 1.4 | $2.40 \times 10^{-02}$ | Pyridoxal phosphate-dependent transferase, major region, subdomain 1    | 3  | 2.2 | $6.20 \times 10^{-02}$ |
| Glutathione S-transferase, N-terminal                           | 3  | 2.2 | $2.50 \times 10^{-02}$ | Pyridoxal phosphate-dependent transferase                               | 3  | 2.2 | $6.40 \times 10^{-02}$ |
| Tubulin/FtsZ, 2-layer sandwich domain                           | 3  | 2.2 | $2.50 \times 10^{-02}$ | Polyketide synthase, enoylreductase                                     | 2  | 1.4 | $7.70 \times 10^{-02}$ |
| Thioredoxin domain                                              | 3  | 2.2 | $2.70 \times 10^{-02}$ | Glutamine synthetase/guanido kinase, catalytic domain                   | 2  | 1.4 | $8.40 \times 10^{-02}$ |
| Tubulin/FtsZ, GTPase domain                                     | 3  | 2.2 | $2.80 \times 10^{-02}$ | RmlC-like cupin domain                                                  | 2  | 1.4 | $9.10 \times 10^{-02}$ |

GC: Gene Count.
