# Supplementary material for: Insights into Common Octopus (Octopus vulgaris) Ink Proteome and Bioactive Peptides Using Proteomic Approaches
Source: MDPI journal article supplement (doi:10.3390/md21040206), 2023-03-24
Supplement: s1 [file s1]

**Supplementary File S4.** KEGG pathway analysis of octopus ink proteome by DAVID version 6.8.

| No | KEGG Pathway                            | p-Value                | No | KEGG Pathway                                 | p-Value                |
|----|-----------------------------------------|------------------------|----|----------------------------------------------|------------------------|
| 1  | Carbon metabolism                       | $2.20 \times 10^{-12}$ | 12 | Biosynthesis of nucleotide sugars            | $1.10 \times 10^{-02}$ |
| 2  | Biosynthesis of amino acids             | $7.70 \times 10^{-09}$ | 13 | 2-Oxocarboxylic acid metabolism              | $1.40 \times 10^{-02}$ |
| 3  | Fructose and mannose metabolism         | $1.90 \times 10^{-07}$ | 14 | Cysteine and methionine metabolism           | $2.80 \times 10^{-02}$ |
| 4  | Glycolysis / Gluconeogenesis            | $1.10 \times 10^{-06}$ | 15 | Arginine and proline metabolism              | $3.30 \times 10^{-02}$ |
| 5  | Metabolic pathways                      | $2.50 \times 10^{-06}$ | 16 | beta-Alanine metabolism                      | $3.50 \times 10^{-02}$ |
| 6  | Pentose phosphate pathway               | $3.60 \times 10^{-05}$ | 17 | Fatty acid degradation                       | $4.70 \times 10^{-02}$ |
| 7  | Pyruvate metabolism                     | $3.10 \times 10^{-04}$ | 18 | Amino sugar and nucleotide sugar metabolism  | $5.50 \times 10^{-02}$ |
| 8  | Proteasome                              | $6.90 \times 10^{-04}$ | 19 | Arginine biosynthesis                        | $7.00 \times 10^{-02}$ |
| 9  | Drug metabolism - other enzymes         | $5.00 \times 10^{-03}$ | 20 | Pantothenate and CoA biosynthesis            | $8.70 \times 10^{-02}$ |
| 10 | Citrate cycle (TCA cycle)               | $9.30 \times 10^{-03}$ | 21 | Metabolism of xenobiotics by cytochrome P450 | $9.80 \times 10^{-02}$ |
| 11 | Glyoxylate and dicarboxylate metabolism | $9.30 \times 10^{-03}$ |    |                                              |                        |
