# Supplementary material for: Insights into Common Octopus (Octopus vulgaris) Ink Proteome and Bioactive Peptides Using Proteomic Approaches
Source: MDPI journal article supplement (doi:10.3390/md21040206), 2023-03-24
Supplement: s1 [file s1]

Supplementary File S2: Common octopus (*O. vulgaris*) ink proteome (FDR < 1%)

| Nº  | Accession            | Description                                                                           | Gene name           | Homologous Gene   | PSMs | UPs | Cov. [%] |
|-----|----------------------|---------------------------------------------------------------------------------------|---------------------|-------------------|------|-----|----------|
| 1.  | A0A6P7SER3           | Hemocyanin 1-like OS= <i>Octopus vulgaris</i>                                         | LOC115212215        | HCA               | 527  | 16  | 47       |
| 2.  | A0A6P7SDC4           | Hemocyanin G-type, units Oda to Odg OS= <i>Octopus vulgaris</i>                       | LOC115211670        | HCG               | 517  | 2   | 51       |
| 3.  | Cluster-58773.162319 | Hemocyanin G-type OS= <i>Enteroctopus dofleini</i>                                    | ODHCY               | HCG               | 512  | 4   | 50       |
| 4.  | Cluster-58773.132244 | Peroxidase-like protein, partial OS= <i>Euprymna scolopes</i>                         | GenBank: L01771.1   | prx1              | 268  | 15  | 35       |
| 5.  | A0A6P7TQ10           | Uncharacterized protein OS= <i>Octopus vulgaris</i>                                   | LOC115225177        |                   | 126  | 25  | 43       |
| 6.  | A0A6P7SI10           | CD109 antigen isoform X2 OS= <i>Octopus vulgaris</i>                                  | LOC115213260        | CD109             | 107  | 36  | 37       |
| 7.  | Q9BJ58               | Hemocyanin G-type (Fragment) OS= <i>Enteroctopus dofleini</i>                         | GenBank: AF338426.3 | HCG               | 103  | 1   | 13       |
| 8.  | O61363               | Hemocyanin G-type, units Oda to Odg OS= <i>Enteroctopus dofleini</i>                  | ODHCY               | HCG               | 95   | 1   | 12       |
| 9.  | Cluster-58773.88130  | PREDICTED: Puromycin-sensitive aminopeptidase-like OS= <i>Crassostrea gigas</i>       | LOC117689997        | NPEPPSL1          | 58   | 30  | 37       |
| 10. | A0A6P7U7W9           | Putative aminopeptidase W07G4.4 isoform X1 OS= <i>Octopus vulgaris</i>                | LOC115232621        | YH24              | 36   | 23  | 61       |
| 11. | A0A6P7T042           | LOW QUALITY PROTEIN: Paramyosin-like OS= <i>Octopus vulgaris</i>                      | LOC115218392        | PRM               | 33   | 4   | 28       |
| 12. | A0A7E6ET70           | Tropomyosin Tod p 1.0102 isoform X27 OS= <i>Octopus vulgaris</i>                      | LOC115210626        | ov-tm             | 30   | 4   | 49       |
| 13. | A0A7E6EW98           | 10-formyltetrahydrofolate dehydrogenase OS= <i>Octopus vulgaris</i>                   | LOC115216749        | ALDH1L2           | 47   | 26  | 34       |
| 14. | Cluster-58773.164376 | PREDICTED: Paramyosin-like isoform X1 OS= <i>Crassostrea gigas</i>                    | LOC117692239        | PRM               | 33   | 1   | 35       |
| 15. | A0A7E6EQL5           | Tropomyosin Tod p 1.0102 isoform X3 OS= <i>Octopus vulgaris</i>                       | LOC115210626        | ov-tm             | 29   | 3   | 49       |
| 16. | Cluster-58773.13946  | Hypothetical protein BRAFLDRAFT_209115 OS= <i>Branchiostoma floridae</i>              | N/A                 | BRAFLDRAFT_209115 | 40   | 18  | 44       |
| 17. | Cluster-58773.74875  | Peroxidase-like protein, partial OS= <i>Euprymna scolopes</i>                         | LOC115221592        | prx1              | 53   | 3   | 30       |
| 18. | A0A0L8FXZ4           | Uncharacterized protein OS= <i>Octopus bimaculoides</i>                               | OCBIM_22004572mg    | OCBIM_22004572mg  | 117  | 2   | 23       |
| 19. | A0A7E6EQM0           | Tropomyosin Tod p 1.0102 isoform X10 OS= <i>Octopus vulgaris</i>                      | LOC115210626        | ov-tm             | 26   | 0   | 48       |
| 20. | A0A6P7TRC4           | Myosin heavy chain, striated muscle OS= <i>Octopus vulgaris</i>                       | LOC115225111        | MHC               | 28   | 23  | 12       |
| 21. | A0A0L8G7X1           | Uncharacterized protein OS= <i>Octopus bimaculoides</i>                               | OCBIM_22038393mg    | OCBIM_22038393mg  | 31   | 2   | 25       |
| 22. | A0A0L8FFZ3           | Tyrosinase_Cu-bd domain-containing protein (Fragment) OS= <i>Octopus bimaculoides</i> | OCBIM_22022789mg    | DCT               | 41   | 1   | 30       |
| 23. | A0A7E6FFI6           | Chorion peroxidase-like OS= <i>Octopus vulgaris</i>                                   | LOC115221248        | pxt               | 48   | 1   | 30       |
| 24. | I0JGT9               | Actin I OS= <i>Sepia officinalis</i>                                                  | ACTI                | ACTI              | 23   | 2   | 40       |
| 25. | Cluster-58773.163468 | Thioester-containing protein 1 OS= <i>Euprymna scolopes</i>                           | GenBank: JQ392569.1 | TEP               | 25   | 3   | 34       |
| 26. | A0A6P7SKQ4           | Actin, cytoplasmic OS= <i>Octopus vulgaris</i>                                        | LOC115214120        | ACTB              | 25   | 2   | 38       |
| 27. | A0A7E6FE51           | Filamin-A isoform X1 OS= <i>Octopus vulgaris</i> OX=6645                              | LOC115220251        | filip1            | 18   | 17  | 9        |
| 28. | A0A0L8H9P1           | Uncharacterized protein OS= <i>Octopus bimaculoides</i>                               | OCBIM_22019540mg    | OCBIM_22019540mg  | 19   | 6   | 31       |
| 29. | A0A6P7TXP9           | Uncharacterized protein OS= <i>Octopus vulgaris</i>                                   | LOC115231284        |                   | 17   | 5   | 57       |
| 30. | Cluster-58773.141566 | Fructose-bisphosphate aldolase OS= <i>Crassostrea gigas</i>                           | LOC105335896        | fbaA              | 20   | 10  | 23       |
| 31. | A0A6P7SAW7           | Transketolase OS= <i>Octopus vulgaris</i>                                             | LOC115210747        | TKT               | 17   | 10  | 19       |

|     |                      |                                                                                |                     |            |    |    |    |
|-----|----------------------|--------------------------------------------------------------------------------|---------------------|------------|----|----|----|
| 32. | A0A6P7SD30           | Tropomyosin Tod p 1.0102 OS= <i>Octopus vulgaris</i>                           | LOC115211774        | ov-tm      | 13 | 9  | 38 |
| 33. | Q27Q56               | Hemocyanin subunit 2 (Fragment) OS= <i>Sepia officinalis</i>                   | GenBank: DQ388570.1 | HCB        | 25 | 0  | 3  |
| 34. | A0A7E6F2W5           | Calreticulin OS= <i>Octopus vulgaris</i>                                       | LOC115215618        | CALR       | 14 | 9  | 33 |
| 35. | A0A6P7TGG8           | Gamma-cystathionase OS= <i>Octopus vulgaris</i>                                | LOC115223921        | CTH        | 18 | 9  | 28 |
| 36. | A0A812CKE2           | ACTB_G1 OS= <i>Sepia pharaonis</i>                                             | SPHA_36281          | SPHA_36281 | 15 | 2  | 31 |
| 37. | A0A6P7T7W6           | Aspartyl aminopeptidase OS= <i>Octopus vulgaris</i>                            | LOC115220844        | DNPEP      | 12 | 9  | 33 |
| 38. | Cluster-58773.104902 | PREDICTED: Xaa-Pro dipeptidase-like OS= <i>Aplysia californica</i>             | N/A                 | pepQ       | 17 | 12 | 31 |
| 39. | A0A0S1U346           | Triosephosphate isomerase OS= <i>Amphioctopus fangsiao</i>                     | N/A                 | TPI1       | 13 | 10 | 43 |
| 40. | A0A6P7SDN6           | Gelsolin-like protein 2 OS= <i>Octopus vulgaris</i>                            | LOC115211664        | GSN        | 10 | 9  | 33 |
| 41. | A0A812CBN1           | Uncharacterized protein OS= <i>Sepia pharaonis</i>                             | SPHA_33848          | SPHA_33848 | 26 | 1  | 3  |
| 42. | A0A6P7SJH5           | Cytosolic non-specific dipeptidase OS= <i>Octopus vulgaris</i>                 | LOC115213824        | CNDP2      | 17 | 10 | 35 |
| 43. | Cluster-58773.126821 | Fatty acid-binding protein, liver OS= <i>Acanthisitta chloris</i>              | N310_11520          | N310_11520 | 15 | 6  | 34 |
| 44. | Cluster-58773.194608 | Sodium-calcium exchanger OS= <i>Doryteuthis pealeii</i>                        | GenBank: ACL80558.1 | SLC8A1     | 15 | 9  | 45 |
| 45. | A0A6P7TGA0           | Isocitrate dehydrogenase [NADP] OS= <i>Octopus vulgaris</i>                    | LOC115223822        | IDH1       | 10 | 8  | 18 |
| 46. | Cluster-58773.122645 | Glutathione-S-transferase OS= <i>Sepiella maindroni</i>                        | GST                 | GST        | 16 | 9  | 40 |
| 47. | A0A077B6R8           | Hemocyanin subunit 1 OS= <i>Euprymna scolopes</i>                              | HCY1                | HCY1       | 22 | 1  | 3  |
| 48. | A0A6P7T8U5           | Uncharacterized protein OS= <i>Octopus vulgaris</i>                            | LOC115221216        |            | 11 | 3  | 24 |
| 49. | A0A6P7T066           | Glyceraldehyde-3-phosphate dehydrogenase OS= <i>Octopus vulgaris</i>           | LOC115217845        | GAPDHS     | 14 | 1  | 18 |
| 50. | Cluster-58773.160890 | Glyceraldehyde-3-phosphate dehydrogenase OS= <i>Cancer borealis</i>            | LOC115216358        | GAPDHS     | 13 | 2  | 20 |
| 51. | A0A2I7NB22           | Superoxide dismutase [Cu-Zn] OS= <i>Octopus vulgaris</i>                       | LOC115227776        | SOD1       | 6  | 3  | 36 |
| 52. | W6CNR9               | Hemocyanin subunit 3 OS= <i>Sepia officinalis</i>                              | N/A                 | HCC        | 16 | 1  | 3  |
| 53. | Cluster-58773.135700 | Serine protease 1 OS= <i>Heterololigo bleekeri</i>                             | GenBank: AB512499.1 |            | 12 | 3  | 42 |
| 54. | Cluster-58773.162111 | Laminin subunit alpha-2, partial OS= <i>Stegodyphus mimosarum</i>              | X975_11537          | lama2      | 9  | 2  | 22 |
| 55. | A0A6P7TYN8           | Protein disulfide-isomerase OS= <i>Octopus vulgaris</i>                        | LOC115231769        | PDI        | 9  | 8  | 21 |
| 56. | A0A812CD65           | Uncharacterized protein OS= <i>Sepia pharaonis</i>                             | SPHA_33819          | SPHA_33819 | 21 | 1  | 2  |
| 57. | A0A6P7S9Z4           | Calmodulin OS= <i>Octopus vulgaris</i>                                         | LOC115210643        | CALM       | 13 | 5  | 48 |
| 58. | A0A6P7SIX4           | Inorganic diphosphatase OS= <i>Octopus vulgaris</i>                            | LOC115213471        | NDKB       | 12 | 7  | 24 |
| 59. | Cluster-58773.127031 | Nucleoside diphosphate kinase B OS= <i>Crassostrea gigas</i>                   | N/A                 | NME2       | 11 | 5  | 35 |
| 60. | A0A6P7SRB2           | Acidic mammalian chitinase isoform X1 OS= <i>Octopus vulgaris</i>              | LOC115215700        | CHIA       | 9  | 9  | 26 |
| 61. | A0A6P7TMW4           | Heat shock protein HSP 90-alpha isoform X2 OS= <i>Octopus vulgaris</i>         | LOC115224220        | HSP90AA1   | 10 | 10 | 14 |
| 62. | Cluster-58773.162759 | Uncharacterized protein LOC101847027 isoform X1 OS= <i>Aplysia californica</i> | LOC101847027        |            | 12 | 8  | 37 |
| 63. | A0A6P7T5D5           | Aspartate aminotransferase OS= <i>Octopus vulgaris</i>                         | LOC115219838        | GOT1       | 9  | 8  | 20 |
| 64. | A0A7E6F5B1           | Collagen alpha-1(XII) chain-like OS= <i>Octopus vulgaris</i>                   | LOC118765117        | COL12A1    | 8  | 7  | 19 |
| 65. | A0A0L8GJH5           | Pyruvate kinase OS= <i>Octopus bimaculoides</i>                                | OCBIM_22032473mg    | PyK        | 8  | 7  | 13 |

|     |                      |                                                                                             |                     |                   |    |   |    |
|-----|----------------------|---------------------------------------------------------------------------------------------|---------------------|-------------------|----|---|----|
| 66. | A0A7E6EUU7           | Uncharacterized protein OS= <i>Octopus vulgaris</i>                                         | LOC118763595        |                   | 6  | 5 | 54 |
| 67. | A0A6P7SUK9           | Adenosylhomocysteinase OS= <i>Octopus vulgaris</i>                                          | LOC115216611        | AHCY              | 9  | 8 | 23 |
| 68. | G0Y7C4               | Arginine kinase OS= <i>Sepiella maindroni</i>                                               | AK                  | AK                | 6  | 1 | 12 |
| 69. | A0A6P7SQQ6           | Cathepsin L1 OS= <i>Octopus vulgaris</i>                                                    | LOC115215566        | CTSL1             | 8  | 5 | 11 |
| 70. | A0A6P7TKE4           | Probable aminopeptidase NPEPL1 isoform X1 OS= <i>Octopus vulgaris</i>                       | LOC115223934        | NPEPL1            | 11 | 7 | 21 |
| 71. | Cluster-58773.174510 | Hypothetical protein BRAFLDRAFT_127655 OS= <i>Branchiostoma floridae</i>                    | N/A                 | BRAFLDRAFT_127655 | 9  | 4 | 22 |
| 72. | Cluster-58773.83035  | PREDICTED: Thymidine phosphorylase-like isoform X1 OS= <i>Haplochromis burtoni</i>          | LOC121814411        | TYMP              | 11 | 9 | 18 |
| 73. | Cluster-58773.161841 | Arginine kinase OS= <i>Amphioctopus fangsiao</i>                                            | AK                  | AK                | 8  | 2 | 44 |
| 74. | Cluster-58773.89511  | PREDICTED: Alpha-aminoadipic semialdehyde dehydrogenase-like OS= <i>Aplysia californica</i> | N/A                 | ALDH7A1           | 7  | 4 | 15 |
| 75. | A0A6P7SYF3           | Retinal dehydrogenase 1 OS= <i>Octopus vulgaris</i>                                         | LOC115217862        | aldh1a2           | 7  | 7 | 17 |
| 76. | Cluster-58773.161692 | 14-3-3 protein epsilon OS= <i>Octopus bimaculoides</i>                                      | LOC115213049        | YWHAE             | 7  | 1 | 18 |
| 77. | A0A6P7TYT0           | Histidine--tRNA ligase OS= <i>Octopus vulgaris</i>                                          | LOC115230998        | HARS1             | 5  | 1 | 11 |
| 78. | Cluster-58773.47482  | Hypothetical protein CAPTEDRAFT_211623 OS= <i>Capitella teleta</i>                          | GenBank: KB301731.1 | CAPTEDRAFT_211623 | 10 | 5 | 27 |
| 79. | A0A6P7UAQ3           | 14 kDa Fatty acid-binding protein OS= <i>Octopus vulgaris</i>                               | LOC115232340        | Fabp              | 11 | 5 | 55 |
| 80. | Q9TWW9               | ALPHAM, Alpha-macroglobulin proteinase inhibitor (Fragment) OS= <i>Octopus vulgaris</i>     | N/A                 |                   | 6  | 1 | 70 |
| 81. | A0A6P7SQT5           | Cathepsin L1-like OS= <i>Octopus vulgaris</i>                                               | LOC115215560        | CTSL1             | 6  | 4 | 15 |
| 82. | A0A6P7TRF4           | Catalase OS= <i>Octopus vulgaris</i>                                                        | LOC115228352        | CAT               | 7  | 5 | 14 |
| 83. | A0A7E6FT44           | 4-hydroxyphenylpyruvate dioxygenase OS= <i>Octopus vulgaris</i>                             | LOC115226087        | HPD               | 6  | 4 | 15 |
| 84. | A0A7E6EY74           | Twitchin OS= <i>Octopus vulgaris</i>                                                        | LOC115213975        | Twitchin          | 5  | 5 | 2  |
| 85. | A0A0L8HJ80           | Major vault protein OS= <i>Octopus bimaculoides</i>                                         | OCBIM_22013292mg    | MVP               | 8  | 7 | 8  |
| 86. | A0A812DI02           | Tubulin beta chain OS= <i>Sepia pharaonis</i>                                               | SPHA_52176          | TUBB              | 6  | 6 | 22 |
| 87. | Cluster-58773.147322 | Hypothetical protein LOTGIDRAFT_161773 OS= <i>Lottia gigantea</i>                           | LOTGIDRAFT_161773   | LOTGIDRAFT_161773 | 6  | 6 | 12 |
| 88. | A0A0L8FRZ6           | 14_3_3 domain-containing protein OS= <i>Octopus bimaculoides</i>                            | OCBIM_22009637mg    | OCBIM_22009637mg  | 8  | 1 | 16 |
| 89. | Q06331               | Tubulin alpha chain OS= <i>Enteroctopus dofleini</i>                                        | LOC115226892        | TUBA              | 5  | 2 | 14 |
| 90. | A0A6P7SVM2           | Spectrin beta chain OS= <i>Octopus vulgaris</i>                                             | LOC115216977        | SPTBN1            | 4  | 4 | 3  |
| 91. | A0A7E6EZ79           | L-threonine ammonia-lyase-like OS= <i>Octopus vulgaris</i>                                  | LOC115214389        | tdcB              | 5  | 5 | 14 |
| 92. | A0A812CBL4           | HSPA1s OS= <i>Sepia pharaonis</i>                                                           | SPHA_33061          | HSPA1s            | 6  | 2 | 9  |
| 93. | Cluster-58773.152500 | PREDICTED: Adenosine deaminase-like OS= <i>Crassostrea gigas</i>                            | CGI_10018537        | Adal              | 5  | 4 | 16 |
| 94. | Cluster-58773.174459 | Hypothetical protein LOTGIDRAFT_153262 OS= <i>Lottia gigantea</i>                           | LOTGIDRAFT_153262   | LOTGIDRAFT_153262 | 5  | 1 | 13 |
| 95. | A0A6P7SP92           | Carbonyl reductase (NADPH) OS= <i>Octopus vulgaris</i>                                      | LOC115215080        | CBR               | 6  | 6 | 25 |
| 96. | A0A6P7TG88           | Chymotrypsin B-like OS= <i>Octopus vulgaris</i>                                             | LOC115222971        | Ctrb              | 7  | 1 | 32 |
| 97. | A0A6P7TPW3           | 2-phospho-D-glycerate hydro-lyase OS= <i>Octopus vulgaris</i>                               | LOC115224300        | ENO               | 6  | 6 | 12 |
| 98. | A0A6P7TH79           | Ferritin OS= <i>Octopus vulgaris</i>                                                        | LOC115223217        | FER               | 5  | 5 | 33 |
| 99. | Cluster-58773.173059 | Calreticulin OS= <i>Hyriopsis cumingii</i>                                                  | LOC115215618        | CALR              | 3  | 1 | 22 |

|      |                      |                                                                                      |                     |                   |    |   |    |
|------|----------------------|--------------------------------------------------------------------------------------|---------------------|-------------------|----|---|----|
| 100. | Cluster-58773.93343  | PREDICTED: Xylose isomerase-like OS= <i>Crassostrea gigas</i>                        | LOC105340946        | XYLA              | 5  | 5 | 13 |
| 101. | A0A0L8G196           | GDP-D-mannose dehydratase (Fragment) OS= <i>Octopus bimaculoides</i>                 | OCBIM_22002213mg    | Gmd               | 6  | 4 | 17 |
| 102. | Cluster-58773.168901 | Aspartate aminotransferase, mitochondrial-like, partial OS= <i>Crassostrea gigas</i> | CGI_10027059        | GOT2              | 6  | 6 | 19 |
| 103. | A0A6P7TJB0           | O-methyltransferase MdmC OS= <i>Octopus vulgaris</i>                                 | LOC115222932        | MdmC              | 6  | 6 | 22 |
| 104. | A0A7E6FRZ6           | Hemocyanin G-type, units Oda to Odg-like OS= <i>Octopus vulgaris</i>                 | LOC115225590        | ODHCY             | 5  | 1 | 2  |
| 105. | A0A6P7TWP3           | Chymotrypsin-like protease CTRL-1 OS= <i>Octopus vulgaris</i>                        | LOC115226866        | CTRL              | 7  | 2 | 14 |
| 106. | A0A6P7T7N8           | Dihydropteridine reductase OS= <i>Octopus vulgaris</i>                               | LOC115219744        | QDPR              | 4  | 3 | 15 |
| 107. | Cluster-58773.148525 | Hypothetical protein LOTGIDRAFT_201834 OS= <i>Lottia gigantea</i>                    | LOTGIDRAFT_201834   | LOTGIDRAFT_201834 | 7  | 7 | 8  |
| 108. | A0A6P7T9I0           | Glyoxalase I OS= <i>Octopus vulgaris</i>                                             | LOC115221453        | GLO1              | 5  | 3 | 21 |
| 109. | A0A6P7SJV4           | S-(hydroxymethyl)glutathione dehydrogenase OS= <i>Octopus vulgaris</i>               | LOC115213890        | ADH5              | 6  | 3 | 9  |
| 110. | F0V3W2               | Hemocyanin (Fragment) OS= <i>Lepidochitona cinerea</i>                               | hc-fg               | hc-fg             | 11 | 2 | 3  |
| 111. | R9WBT1               | 14-3-3 protein epsilon OS= <i>Octopus bimaculoides</i>                               | LOC115213049        | YWHAE             | 9  | 5 | 20 |
| 112. | A0A6P7T656           | Aconitate hydratase, mitochondrial OS= <i>Octopus vulgaris</i>                       | LOC115219777        | ACO1              | 3  | 3 | 5  |
| 113. | Cluster-58773.193716 | Hypothetical protein LOTGIDRAFT_233221 OS= <i>Lottia gigantea</i>                    | LOTGIDRAFT_233221   | LOTGIDRAFT_233221 | 4  | 4 | 11 |
| 114. | A0A6P7T402           | Uncharacterized HIT-like protein Synpcc7942_1390 OS= <i>Octopus vulgaris</i>         | LOC115219148        | Synpcc7942_1390   | 6  | 4 | 43 |
| 115. | Cluster-58773.197059 | Hypothetical protein BRAFLDRAFT_281736 OS= <i>Branchiostoma floridae</i>             | N/A                 | BRAFLDRAFT_281736 | 6  | 1 | 9  |
| 116. | A0A6P7SH66           | Alpha-actinin, sarcomeric isoform X3 OS= <i>Octopus vulgaris</i>                     | LOC115212896        | actn1             | 4  | 4 | 6  |
| 117. | A0A7E6EUH0           | Crystallin J1A OS= <i>Octopus vulgaris</i>                                           | LOC115212045        | CRJ1A             | 5  | 3 | 11 |
| 118. | A0A0L8GLX8           | S-formylglutathione hydrolase OS= <i>Octopus bimaculoides</i>                        | OCBIM_22031609mg    | ESD               | 4  | 4 | 19 |
| 119. | A0A0L8HN06           | Tubulin alpha chain OS= <i>Octopus bimaculoides</i>                                  | OCBIM_22010928mg    | TUBA              | 4  | 1 | 12 |
| 120. | A0A6P7SEM8           | Alpha-mannosidase OS= <i>Octopus vulgaris</i>                                        | LOC115211875        | MAN2A1            | 5  | 5 | 6  |
| 121. | Cluster-58773.192724 | PREDICTED: Thioredoxin-like OS= <i>Amphimedon queenslandica</i>                      | LOC100634844        | TXNL4A            | 5  | 2 | 23 |
| 122. | A0A6P7SUU8           | 2-iminobutanoate/2-iminopropanoate deaminase OS= <i>Octopus vulgaris</i>             | LOC115216465        | RIDA              | 8  | 5 | 39 |
| 123. | A0A6P7SGA6           | Clathrin heavy chain OS= <i>Octopus vulgaris</i>                                     | LOC115212844        | CLTC              | 3  | 2 | 2  |
| 124. | A0A0L8GZP6           | IF rod domain-containing protein OS= <i>Octopus bimaculoides</i>                     | OCBIM_22025456mg    | OCBIM_22025456mg  | 2  | 1 | 7  |
| 125. | A0A0L8IEX1           | Uncharacterized protein OS= <i>Octopus bimaculoides</i>                              | OCBIM_22014847mg    | OCBIM_22014847mg  | 5  | 4 | 23 |
| 126. | A0A6P7T0X7           | Ganglioside GM2 activator OS= <i>Octopus vulgaris</i>                                | LOC115218607        | GM2A              | 5  | 3 | 17 |
| 127. | A0A6P7T7L0           | Heat shock cognate 71 kDa protein OS= <i>Octopus vulgaris</i>                        | LOC115220772        | HSPA8             | 5  | 1 | 8  |
| 128. | A0A7E6ENX1           | Spectrin alpha chain isoform X2 OS= <i>Octopus vulgaris</i>                          | LOC115227715        | Sptan1            | 3  | 3 | 2  |
| 129. | Cluster-58773.160867 | Soma ferritin OS= <i>Lymnaea stagnalis</i>                                           | GenBank: AAB24081.1 | FRIS              | 4  | 3 | 20 |
| 130. | Cluster-58773.198809 | PREDICTED: Carbonic anhydrase 1-like OS= <i>Aplysia californica</i>                  | LOC106013759        | CA1               | 4  | 3 | 14 |
| 131. | A0A6P7SCY0           | Uncharacterized protein OS= <i>Octopus vulgaris</i>                                  | LOC115211594        |                   | 7  | 4 | 38 |
| 132. | A0A6P7TMY2           | Fumarylacetoacetase OS= <i>Octopus vulgaris</i>                                      | LOC115226547        | Fah               | 6  | 1 | 11 |
| 133. | A0A6P7TG90           | Glutathione transferase OS= <i>Octopus vulgaris</i>                                  | LOC115223852        | GST               | 4  | 4 | 19 |

|      |                      |                                                                                                           |                     |                   |    |   |    |
|------|----------------------|-----------------------------------------------------------------------------------------------------------|---------------------|-------------------|----|---|----|
| 134. | A0A7E6EK24           | Deoxynucleoside triphosphate triphosphohydrolase SAMHD1-like OS= <i>Octopus vulgaris</i>                  | LOC115231394        | Samhd1            | 6  | 3 | 11 |
| 135. | A0A6P7T9Z5           | Thymosin beta isoform X2 OS= <i>Octopus vulgaris</i>                                                      | LOC115221752        | tmsb              | 3  | 1 | 28 |
| 136. | A0A6P7T046           | Glyoxylate reductase/hydroxypyruvate reductase OS= <i>Octopus vulgaris</i>                                | LOC115218137        | grhpr             | 3  | 3 | 15 |
| 137. | A0A0L8G0V9           | Uncharacterized protein OS= <i>Octopus bimaculoides</i>                                                   | OCBIM_22003270mg    | OCBIM_22003270mg  | 5  | 3 | 7  |
| 138. | Cluster-58773.162300 | Hemocyanin A-type OS= <i>Enteroctopus dofleini</i>                                                        | HA                  | HA                | 3  | 1 | 53 |
| 139. | Cluster-58773.169829 | Uncharacterized protein LOC105329712 isoform X1 OS= <i>Crassostrea gigas</i>                              | LOC105329712        |                   | 3  | 1 | 25 |
| 140. | Cluster-58773.179191 | Hypothetical protein BRAFLDRAFT_280591 OS= <i>Branchiostoma floridae</i>                                  | N/A                 | BRAFLDRAFT_280591 | 2  | 2 | 7  |
| 141. | Cluster-58773.155745 | Hypothetical protein CAPTEDRAFT_117881, partial OS= <i>Capitella teleta</i>                               | CAPTEDRAFT_117881   | CAPTEDRAFT_117881 | 4  | 2 | 11 |
| 142. | A0A812DBA1           | RP-S27Ae OS= <i>Sepia pharaonis</i>                                                                       | SPHA_48671          | RP-S27Ae          | 12 | 3 | 24 |
| 143. | A0A6P7U923           | Fatty acid-binding protein homolog 5 OS= <i>Octopus vulgaris</i>                                          | LOC115232159        | lbp-5             | 4  | 3 | 31 |
| 144. | A0A6P7S7L1           | Inositol-1-monophosphatase OS= <i>Octopus vulgaris</i>                                                    | LOC115209728        | suhB              | 4  | 3 | 20 |
| 145. | Cluster-58773.187542 | PREDICTED: Uncharacterized protein OS= <i>Aplysia californica</i>                                         | LOC101849508        |                   | 3  | 3 | 15 |
| 146. | A0A6P7T0G1           | Phosphoglycerate kinase OS= <i>Octopus vulgaris</i>                                                       | LOC115218470        | pgk               | 5  | 4 | 13 |
| 147. | A0A6P7SWF0           | Probable methylmalonate-semialdehyde dehydrogenase [acylating], mitochondrial OS= <i>Octopus vulgaris</i> | LOC115217127        | alh-8             | 3  | 3 | 8  |
| 148. | A0A6P7TFF7           | Uncharacterized protein OS= <i>Octopus vulgaris</i>                                                       | LOC115223512        |                   | 5  | 3 | 28 |
| 149. | A0A6P7SDM4           | Lysosomal aspartic protease isoform X2 OS= <i>Octopus vulgaris</i>                                        | LOC115211653        |                   | 2  | 2 | 8  |
| 150. | A0A6P7T444           | Transforming growth factor-beta-induced protein ig-h3-like OS= <i>Octopus vulgaris</i>                    | LOC115219504        | TGFBI             | 4  | 3 | 14 |
| 151. | A0A6P7TFF2           | Regucalcin OS= <i>Octopus vulgaris</i>                                                                    | LOC115222191        | Rgn               | 4  | 2 | 10 |
| 152. | A0A6P7SA56           | Cathepsin B OS= <i>Octopus vulgaris</i>                                                                   | LOC115210644        | Ctsb              | 5  | 2 | 9  |
| 153. | A0A6P7S5H1           | Mannose-6-phosphate isomerase OS= <i>Octopus vulgaris</i>                                                 | LOC115209304        | MPI               | 3  | 2 | 5  |
| 154. | Cluster-58773.152550 | Squidulin OS= <i>Doryteuthis pealeii</i> ; Calcium-binding protein OS= <i>Watasenia scintillans</i>       | LOC115227564        | CABO              | 3  | 2 | 17 |
| 155. | A0A6P7TM22           | Tetratricopeptide repeat protein 38 OS= <i>Octopus vulgaris</i>                                           | LOC115223987        | Ttc38             | 4  | 4 | 13 |
| 156. | A0A6P7SDZ2           | 40S ribosomal protein S14 OS= <i>Octopus vulgaris</i>                                                     | LOC115211938        | RPS14             | 2  | 2 | 16 |
| 157. | Cluster-58773.108885 | Hephaestin-like protein OS= <i>Acropora millepora</i>                                                     | LOC114955653        | HEPHL1            | 3  | 3 | 3  |
| 158. | Cluster-1359.1       | Tropomyosin OS= <i>Jasus lalandii</i>                                                                     | GenBank: JX860677.1 | TM                | 4  | 4 | 14 |
| 159. | A0A6P7SVJ8           | Arginase OS= <i>Octopus vulgaris</i>                                                                      | LOC115216860        | ARG1              | 2  | 2 | 9  |
| 160. | A0A6P7SL43           | Glucosamine-6-phosphate isomerase OS= <i>Octopus vulgaris</i>                                             | LOC115214100        | Gnpda1            | 4  | 4 | 17 |
| 161. | A0A7E6EXQ9           | Cytosolic non-specific dipeptidase isoform X2 OS= <i>Octopus vulgaris</i>                                 | LOC115213823        | CNDP2             | 3  | 1 | 6  |
| 162. | A0A7E6EUU3           | Apoptosis-inducing factor 3 isoform X1 OS= <i>Octopus vulgaris</i>                                        | LOC115213836        | AIFM3             | 2  | 2 | 4  |
| 163. | A0A7E6FHK3           | Thioredoxin isoform X2 OS= <i>Octopus vulgaris</i>                                                        | LOC115222284        |                   | 3  | 2 | 28 |
| 164. | Cluster-58773.217011 | PREDICTED: Prostaglandin reductase 1-like OS= <i>Crassostrea gigas</i>                                    | LOC117682985        | Ptgr1             | 3  | 3 | 11 |
| 165. | A0A6P7TFQ1           | Tetraspanin OS= <i>Octopus vulgaris</i>                                                                   | LOC115222869        | TSPAN1            | 6  | 3 | 10 |
| 166. | A0A0L8G0I6           | 14_3_3 domain-containing protein OS= <i>Octopus bimaculoides</i>                                          | OCBIM_22003454mg    | YWHAE             | 2  | 2 | 11 |

|      |                      |                                                                                                     |                     |                  |   |   |    |
|------|----------------------|-----------------------------------------------------------------------------------------------------|---------------------|------------------|---|---|----|
| 167. | A0A0L8H0K9           | Proteasome subunit alpha type OS= <i>Octopus bimaculoides</i>                                       | OCBIM_22024847mg    | PSMA             | 2 | 2 | 9  |
| 168. | A0A7E6FAL0           | Protein hu-li tai shao isoform X12 OS= <i>Octopus vulgaris</i>                                      | LOC115218883        | hts              | 1 | 1 | 2  |
| 169. | A0A6P7SK96           | Troponin C isoform X2 OS= <i>Octopus vulgaris</i>                                                   | LOC115213894        | TNNC2            | 2 | 2 | 11 |
| 170. | A0A6P7U4P1           | Deoxynucleoside triphosphate triphosphohydrolase SAMHD1-like isoform X2 OS= <i>Octopus vulgaris</i> | LOC115231345        | Samhd1           | 3 | 3 | 7  |
| 171. | A0A6P7SAF9           | Proteasome subunit alpha type OS= <i>Octopus vulgaris</i>                                           | LOC115210708        | PSMA             | 4 | 3 | 15 |
| 172. | A0A7E6ESL5           | Prominin-1-A isoform X4 OS= <i>Octopus vulgaris</i>                                                 | LOC115210705        | prom1a           | 3 | 3 | 4  |
| 173. | A0A6P7TFA3           | Polyol dehydrogenase OS= <i>Octopus vulgaris</i>                                                    | LOC115223465        | Sord             | 2 | 2 | 7  |
| 174. | A0A6P7U2G4           | Uncharacterized protein LOC115232424 OS= <i>Octopus vulgaris</i>                                    | LOC115232424        |                  | 4 | 2 | 4  |
| 175. | A0A6P7U2Q2           | Uncharacterized protein OS= <i>Octopus vulgaris</i>                                                 | LOC115232460        |                  | 2 | 2 | 10 |
| 176. | A0A7E6EHE9           | Prosaposin isoform X1 OS= <i>Octopus vulgaris</i>                                                   | LOC115209891        | Psap             | 8 | 4 | 6  |
| 177. | Cluster-58773.136028 | PREDICTED: UPF0462 protein C4orf33 homolog OS= <i>Saccoglossus kowalevskii</i>                      | LOC100374324        | C4orf33          | 3 | 3 | 12 |
| 178. | A0A7E6FG45           | Filamin-A isoform X3 OS= <i>Octopus vulgaris</i>                                                    | LOC115220426        | FLNA             | 2 | 2 | 3  |
| 179. | A0A812E3Y7           | RAB11A OS= <i>Sepia pharaonis</i>                                                                   | SPHA_67892          | RAB11A           | 3 | 3 | 12 |
| 180. | A0A6P7SDW4           | Tropomyosin Tod p 1.0102 OS= <i>Octopus vulgaris</i>                                                | LOC115211717        | ov-tm            | 2 | 2 | 14 |
| 181. | A0A6P7TEG5           | Alpha-L-fucosidase OS= <i>Octopus vulgaris</i>                                                      | LOC115223232        | Fuca2            | 4 | 3 | 7  |
| 182. | A0A6P7TDL1           | Proteasome subunit alpha type OS= <i>Octopus vulgaris</i>                                           | LOC115222353        | PSMA             | 5 | 4 | 17 |
| 183. | A0A0L8HS39           | Uncharacterized protein OS= <i>Octopus bimaculoides</i>                                             | OCBIM_22007563mg    | OCBIM_22007563mg | 1 | 1 | 18 |
| 184. | A0A6P7TQA6           | Parkinson disease protein 7 homolog OS= <i>Octopus vulgaris</i>                                     | LOC115224773        | Park7            | 2 | 2 | 18 |
| 185. | A0A6P7SVY8           | 3-ketoacyl-CoA thiolase, mitochondrial isoform X2 OS= <i>Octopus vulgaris</i>                       | LOC115217007        | Acaa2            | 2 | 2 | 7  |
| 186. | A0A6P7T033           | T-complex protein 1 subunit gamma OS= <i>Octopus vulgaris</i>                                       | LOC115218091        | Cct3             | 3 | 3 | 7  |
| 187. | A0A6P7S854           | Neuroglian isoform X1 OS= <i>Octopus vulgaris</i>                                                   | LOC115210201        | Nrg              | 1 | 1 | 2  |
| 188. | A0A6P7SYF5           | Retinal dehydrogenase 2 OS= <i>Octopus vulgaris</i>                                                 | LOC115217865        | aldh1a2          | 3 | 3 | 7  |
| 189. | A0A6P7SHI1           | Malate dehydrogenase OS= <i>Octopus vulgaris</i>                                                    | LOC115212957        | MDH              | 4 | 2 | 6  |
| 190. | A0A6P7T245           | Trans-1,2-dihydrobenzene-1,2-diol dehydrogenase isoform X1 OS= <i>Octopus vulgaris</i>              | LOC115218668        | DHDH             | 4 | 3 | 9  |
| 191. | A0A0L8GSZ5           | Histone H4 OS= <i>Octopus bimaculoides</i>                                                          | OCBIM_22029078mg    | H4               | 3 | 3 | 14 |
| 192. | A0A6P7SU25           | Glucose-6-phosphate isomerase OS= <i>Octopus vulgaris</i>                                           | LOC115216343        | GPI              | 3 | 3 | 5  |
| 193. | A0A6P7TDN6           | 4a-hydroxytetrahydrobiopterin dehydratase OS= <i>Octopus vulgaris</i>                               | LOC115221645        | PCBD1            | 3 | 3 | 23 |
| 194. | Cluster-58773.132040 | Cathepsin L2 OS= <i>Sinonovacula constricta</i>                                                     | GenBank: KC874990.1 | CTSV             | 2 | 1 | 12 |
| 195. | A0A6P7SW31           | Proteasome subunit alpha type OS= <i>Octopus vulgaris</i>                                           | LOC115217043        | PSMA             | 3 | 3 | 14 |
| 196. | A0A0L8G5K6           | Uncharacterized protein OS= <i>Octopus bimaculoides</i>                                             | OCBIM_22000375mg    | OCBIM_22000375mg | 1 | 1 | 2  |
| 197. | A0A0L8GWF6           | Uncharacterized protein OS= <i>Octopus bimaculoides</i>                                             | OCBIM_22027193mg    | OCBIM_22027193mg | 2 | 1 | 23 |
| 198. | A0A0L8HFB4           | Pacifastin domain-containing protein OS= <i>Octopus bimaculoides</i>                                | OCBIM_22015839mg    | OCBIM_22015839mg | 2 | 1 | 5  |
| 199. | A0A7E6FJ41           | 70 kDa Neurofilament protein isoform X2 OS= <i>Octopus vulgaris</i>                                 | LOC115222954        | Nefl             | 1 | 1 | 3  |

|      |                      |                                                                                           |                     |                  |   |   |    |
|------|----------------------|-------------------------------------------------------------------------------------------|---------------------|------------------|---|---|----|
| 200. | Cluster-58773.190283 | Deoxynucleoside triphosphate triphosphohydrolase SAMHD1-like OS= <i>Poecilia formosa</i>  | LOC103132374        | Samhd1           | 3 | 2 | 8  |
| 201. | A0A6P7SLL4           | Glutathione S-transferase omega OS= <i>Octopus vulgaris</i>                               | LOC115214295        | GSTO1            | 3 | 3 | 14 |
| 202. | A0A6P7SRT8           | ATP synthase subunit beta OS= <i>Octopus vulgaris</i>                                     | LOC115215584        | atpb             | 1 | 1 | 3  |
| 203. | A0A6P7T526           | Probable phosphoglycerate mutase OS= <i>Octopus vulgaris</i>                              | LOC115219769        | gpmB             | 2 | 2 | 8  |
| 204. | A0A812CP82           | Aldehyde dehydrogenase (NAD (+)) OS= <i>Sepia pharaonis</i>                               | SPHA_37438          | aldh             | 3 | 1 | 6  |
| 205. | A0A0L8HU60           | Tetratricopeptide repeat protein 38 OS= <i>Octopus bimaculoides</i>                       | OCBIM_22006847mg    | Ttc38            | 2 | 2 | 6  |
| 206. | A0A7E6EU42           | Rho GDP-dissociation inhibitor 1 isoform X1 OS= <i>Octopus vulgaris</i>                   | LOC115211966        | Arhgdia          | 1 | 1 | 8  |
| 207. | A0A7E6F650           | Ribokinase OS= <i>Octopus vulgaris</i>                                                    | LOC115217290        | rbsK             | 1 | 1 | 7  |
| 208. | Cluster-58773.130155 | PREDICTED: Mucin-3A-like OS= <i>Aplysia californica</i>                                   | LOC115229619        | MUC3A            | 2 | 2 | 7  |
| 209. | A0A6P7TD81           | Dipeptidyl peptidase 2 isoform X1 OS= <i>Octopus vulgaris</i>                             | LOC115222860        | DPP7             | 2 | 2 | 6  |
| 210. | A0A6P7SCL7           | Cylicin-1 OS= <i>Octopus vulgaris</i>                                                     | LOC115211645        | CYLC1            | 2 | 2 | 21 |
| 211. | A0A6P7TUU5           | Sodium/calcium exchanger regulatory protein 1 OS= <i>Octopus vulgaris</i>                 | LOC115226228        |                  | 1 | 1 | 9  |
| 212. | Cluster-58773.109972 | Inter-alpha-trypsin inhibitor heavy chain H3-like OS= <i>Crassostrea gigas</i>            | LOC117683163        | ITIH3            | 4 | 3 | 3  |
| 213. | A0A0L8H1Z7           | CN Hydrolase domain-containing protein OS= <i>Octopus bimaculoides</i>                    | OCBIM_22024094mg    | VNN1             | 2 | 2 | 10 |
| 214. | Cluster-58773.156686 | PREDICTED: Serine hydroxymethyltransferase, cytosolic-like OS= <i>Crassostrea gigas</i>   | LOC115220966        | SHMT1            | 2 | 2 | 4  |
| 215. | A0A7E6FKU8           | 1,2-dihydroxy-3-keto-5-methylthiopentene dioxygenase OS= <i>Octopus vulgaris</i>          | LOC115223255        | mtnd             | 1 | 1 | 11 |
| 216. | A0A812CG60           | ARF1_2 OS= <i>Sepia pharaonis</i>                                                         | SPHA_38611          | ARF1_2           | 2 | 2 | 13 |
| 217. | A0A6P7TV81           | Proteasome subunit beta OS= <i>Octopus vulgaris</i>                                       | LOC115225870        | PSMB             | 2 | 2 | 9  |
| 218. | A0A812DGV9           | AIFM3 OS= <i>Sepia pharaonis</i>                                                          | SPHA_53448          | AIFM3            | 1 | 1 | 3  |
| 219. | A0A6P7SVS2           | UV excision repair protein RAD23 OS= <i>Octopus vulgaris</i>                              | LOC115216665        | RAD23A           | 1 | 1 | 4  |
| 220. | A0A7E6FR50           | NADH-cytochrome b5 reductase OS= <i>Octopus vulgaris</i>                                  | LOC115224390        | CBR1             | 2 | 2 | 5  |
| 221. | Cluster-58773.105280 | Beta arrestin OS= <i>Idiosepius paradoxus</i>                                             | GenBank: LC021440.1 | ARRB1            | 1 | 1 | 3  |
| 222. | Cluster-58773.201330 | 17beta-HSD14 OS= <i>Azumapecten farreri</i>                                               | GenBank: KC661070.1 | HSD17B14         | 2 | 2 | 16 |
| 223. | A0A0L8H4W4           | Proteasome subunit alpha type OS= <i>Octopus bimaculoides</i>                             | OCBIM_22022293mg    | PSMA             | 1 | 1 | 6  |
| 224. | A0A6P7T4Z8           | Opine dehydrogenase OS= <i>Octopus vulgaris</i>                                           | LOC115219799        | odh              | 2 | 2 | 7  |
| 225. | A0A0L8HB35           | CCT-beta OS= <i>Octopus bimaculoides</i>                                                  | OCBIM_22018710mg    | CCT2             | 1 | 1 | 2  |
| 226. | Cluster-119530.0     | PREDICTED: Tubulin alpha-1B chain isoform X5 OS= <i>Mandrillus leucophaeus</i>            | LOC105544901        | TUBA1B           | 2 | 1 | 29 |
| 227. | A0A6P7SLJ4           | Alpha-galactosidase OS= <i>Octopus vulgaris</i>                                           | LOC115213936        | OCBIM_22022443mg | 2 | 2 | 4  |
| 228. | Cluster-58773.109971 | PREDICTED: Inter-alpha-trypsin inhibitor heavy chain H3-like OS= <i>Crassostrea gigas</i> | LOC117683163        | ITIH3            | 2 | 2 | 7  |
| 229. | A0A6P7SP60           | Peroxiredoxin-2 OS= <i>Octopus vulgaris</i>                                               | LOC115215062        | Prdx2            | 1 | 1 | 6  |
| 230. | A0A6P7SDF8           | Pyridoxal 5'-phosphate synthase subunit SNZERR OS= <i>Octopus vulgaris</i>                | LOC115211795        | SNZERR           | 1 | 1 | 4  |
| 231. | A0A6P7U678           | Collagen alpha-4(VI) chain OS= <i>Octopus vulgaris</i>                                    | LOC115232146        | COL4A4           | 1 | 1 | 2  |
| 232. | A0A6P7SYD8           | Neutral protease isoform X1 OS= <i>Octopus vulgaris</i>                                   | LOC115217300        |                  | 1 | 1 | 2  |
| 233. | A0A0L8FKC8           | 26S proteasome regulatory subunit 7 OS= <i>Octopus bimaculoides</i>                       | OCBIM_22017212mg    | PSMC2            | 1 | 1 | 3  |

|      |                      |                                                                                                                 |                  |                  |   |   |    |
|------|----------------------|-----------------------------------------------------------------------------------------------------------------|------------------|------------------|---|---|----|
| 234. | A0A6P7SYN9           | Barrier-to-autointegration factor B OS= <i>Octopus vulgaris</i>                                                 | LOC115217368     | banf1-b          | 1 | 1 | 13 |
| 235. | A0A7E6FIQ7           | Uncharacterized protein isoform X1 OS= <i>Octopus vulgaris</i>                                                  | LOC115221679     |                  | 4 | 2 | 5  |
| 236. | Cluster-58773.152800 | PREDICTED: Glutathione S-transferase A-like OS= <i>Crassostrea gigas</i>                                        | LOC115210679     | GST-T            | 1 | 1 | 4  |
| 237. | A0A6P7ST76           | Elongation factor 1-beta OS= <i>Octopus vulgaris</i>                                                            | LOC115216350     | EEF1B            | 1 | 1 | 6  |
| 238. | A0A7E6ETD0           | Adenylyl cyclase-associated protein 1 isoform X4 OS= <i>Octopus vulgaris</i>                                    | LOC115210264     | Cap1             | 1 | 1 | 2  |
| 239. | A0A6P7TBG1           | Uridine phosphorylase 1 OS= <i>Octopus vulgaris</i>                                                             | LOC115220972     | Upp1             | 2 | 2 | 14 |
| 240. | A0A0L8GUX3           | Uncharacterized protein OS= <i>Octopus bimaculoides</i>                                                         | OCBIM_22027429mg | OCBIM_22027429mg | 1 | 1 | 3  |
| 241. | A0A6P7SYQ3           | Pancreatic triacylglycerol lipase-like OS= <i>Octopus vulgaris</i>                                              | LOC115217380     | Pnlip            | 1 | 1 | 4  |
| 242. | A0A6P7SCB7           | Gelsolin-like protein 2 OS= <i>Octopus vulgaris</i>                                                             | LOC115211599     | gelsolin         | 1 | 1 | 4  |
| 243. | A0A7E6F1S6           | Microtubule-associated protein futsch isoform X4 OS= <i>Octopus vulgaris</i>                                    | LOC115215514     | futsch           | 1 | 1 | 1  |
| 244. | A0A6P7TS50           | Glutamate--cysteine ligase OS= <i>Octopus vulgaris</i>                                                          | LOC115225878     | GCLC             | 2 | 1 | 2  |
| 245. | Cluster-58773.140088 | Ecdysteroid-regulated 16 kDa protein OS= <i>Danaus plexippus</i>                                                | LOC116770793     | ESR16            | 1 | 1 | 5  |
| 246. | A0A7E6EZI8           | Uncharacterized protein OS= <i>Octopus vulgaris</i>                                                             | LOC115214248     |                  | 1 | 1 | 0  |
| 247. | A0A6P7TK16           | Phosphomannomutase OS= <i>Octopus vulgaris</i>                                                                  | LOC115223856     | PMM              | 2 | 1 | 6  |
| 248. | A0A6P7SE31           | 26S proteasome non-ATPase regulatory subunit 2 OS= <i>Octopus vulgaris</i>                                      | LOC115211842     | PSMD2            | 1 | 1 | 1  |
| 249. | A0A6P7T1G4           | Uncharacterized protein OS= <i>Octopus vulgaris</i>                                                             | LOC115218491     |                  | 1 | 1 | 2  |
| 250. | A0A0L8HJQ8           | Peptidase M20 domain-containing protein 2 OS= <i>Octopus bimaculoides</i>                                       | OCBIM_22013224mg | PM20D1           | 1 | 1 | 3  |
| 251. | A0A7E6ETN4           | Protein-glutamine gamma-glutamyltransferase K OS= <i>Octopus vulgaris</i>                                       | LOC115211974     | TGM1             | 1 | 1 | 2  |
| 252. | A0A7E6F497           | ATP-citrate synthase OS= <i>Octopus vulgaris</i>                                                                | LOC115216353     | ACLY             | 1 | 1 | 1  |
| 253. | Cluster-58773.159728 | PREDICTED: Methylmalonic aciduria and homocystinuria type C protein homolog OS= <i>Saccoglossus kowalevskii</i> | LOC100368262     | Mmachc           | 1 | 1 | 5  |
| 254. | A0A7E6EZ05           | Vinculin OS= <i>Octopus vulgaris</i>                                                                            | LOC115214348     | VCL              | 1 | 1 | 1  |
| 255. | A0A6P7S7P4           | Peroxiredoxin-5 OS= <i>Octopus vulgaris</i>                                                                     | LOC115209798     | Prdx5            | 1 | 1 | 7  |
| 256. | A0A812BJI2           | Non-specific serine/threonine protein kinase OS= <i>Sepia pharaonis</i>                                         | SPHA_16686       | STK11            | 1 | 1 | 3  |
| 257. | A0A6P7TXK0           | Medium-chain specific acyl-CoA dehydrogenase, mitochondrial OS= <i>Octopus vulgaris</i>                         | LOC115228127     | Acadm            | 1 | 1 | 4  |
| 258. | A0A6P7SUD6           | 6-phosphogluconolactonase OS= <i>Octopus vulgaris</i>                                                           | LOC115216558     | pgl              | 1 | 1 | 5  |
| 259. | A0A6P7TSR4           | Carboxypeptidase OS= <i>Octopus vulgaris</i>                                                                    | LOC115226095     |                  | 1 | 1 | 3  |
| 260. | A0A0L8G8E4           | TGc domain-containing protein OS= <i>Octopus bimaculoides</i>                                                   | OCBIM_22038334mg | TGM2             | 1 | 1 | 2  |
| 261. | Cluster-58773.150174 | PREDICTED: Ganglioside GM2 activator-like OS= <i>Aplysia californica</i>                                        | LOC115214095     | GM2A             | 2 | 1 | 9  |
| 262. | A0A6P7S644           | Proteasome subunit beta OS= <i>Octopus vulgaris</i>                                                             | LOC115209401     | PSMB             | 2 | 1 | 4  |
| 263. | A0A6P7TRV9           | Ubiquitin-activating enzyme E1 OS= <i>Octopus vulgaris</i>                                                      | LOC115225288     | UBA1             | 2 | 2 | 2  |
| 264. | Cluster-960.0        | Sarcoplasmic calcium-binding protein OS= <i>Artemia franciscana</i>                                             | SCP1             | SCP1             | 1 | 1 | 5  |
| 265. | A0A812BBI7           | Annexin OS= <i>Sepia pharaonis</i>                                                                              | SPHA_13606       | ANXA1            | 1 | 1 | 3  |
| 266. | A0A6P7SPL2           | Glycogenin-1 isoform X2 OS= <i>Octopus vulgaris</i>                                                             | LOC115215187     | GYG1             | 1 | 1 | 5  |



|      |                      |                                                                                                                                                                                 |                   |                   |   |   |    |
|------|----------------------|---------------------------------------------------------------------------------------------------------------------------------------------------------------------------------|-------------------|-------------------|---|---|----|
| 267. | A0A6P7TBR4           | Golgin subfamily B member 1 isoform X3 OS= <i>Octopus vulgaris</i>                                                                                                              | LOC115221474      | GOLGB1            | 1 | 1 | 2  |
| 268. | A0A6P7TPR7           | Uncharacterized protein OS= <i>Octopus vulgaris</i>                                                                                                                             | LOC115224696      |                   | 2 | 2 | 3  |
| 269. | A0A6P7SKR8           | Vesicle-fusing ATPase OS= <i>Octopus vulgaris</i>                                                                                                                               | LOC115213827      | NSF               | 1 | 1 | 1  |
| 270. | A0A6P7TG43           | GDP-4-keto-6-deoxy-D-mannose-3,5-epimerase-4-reductase OS= <i>Octopus vulgaris</i>                                                                                              | LOC115222310      | fcl               | 2 | 2 | 8  |
| 271. | Cluster-58773.163293 | PREDICTED: Uncharacterized protein OS= <i>Aplysia californica</i>                                                                                                               | LOC101860584      |                   | 2 | 1 | 12 |
| 272. | A0A6P7T914           | Thyroglobulin isoform X2 OS= <i>Octopus vulgaris</i>                                                                                                                            | LOC115220711      | TG                | 2 | 1 | 4  |
| 273. | A0A0L8ICE8           | Calponin-homology (CH) domain-containing protein OS= <i>Octopus bimaculoides</i>                                                                                                | OCBIM_22019394mg  | SPEF1             | 1 | 1 | 8  |
| 274. | A0A6P7T858           | Fructose-bisphosphatase OS= <i>Octopus vulgaris</i>                                                                                                                             | LOC115220925      | FBP1              | 2 | 2 | 9  |
| 275. | A0A7E6FQN6           | Insulin-like growth factor-binding protein complex acid labile subunit isoform X7 OS= <i>Octopus vulgaris</i>                                                                   | LOC115225305      | Igfals            | 2 | 2 | 4  |
| 276. | A0A6P7TUI8           | Uncharacterized protein OS= <i>Octopus vulgaris</i>                                                                                                                             | LOC115225721      |                   | 2 | 2 | 4  |
| 277. | A0A812DEV9           | Rab GDP dissociation inhibitor OS= <i>Sepia pharaonis</i>                                                                                                                       | SPHA_54563        | GDI1/GDI2         | 1 | 1 | 2  |
| 278. | A0A812CYT6           | MYH OS= <i>Sepia pharaonis</i>                                                                                                                                                  | SPHA_42230        | MYH               | 2 | 1 | 1  |
| 279. | A0A6P7TEC1           | Spermidine synthase OS= <i>Octopus vulgaris</i>                                                                                                                                 | LOC115222533      | SRM               | 1 | 1 | 4  |
| 280. | Cluster-58773.6509   | P11221 OPRI_PSEAE Major outer membrane lipoprotein OS= <i>Pseudomonas aeruginosa</i> (strain ATCC 15692 / DSM 22644 / CIP 104116 / JCM 14847 / LMG 12228 / 1C / PRS 101 / PAO1) | oprI              | oprI              | 1 | 1 | 10 |
| 281. | A0A6P7SKQ5           | Tropomyosin-2 OS= <i>Octopus vulgaris</i>                                                                                                                                       | LOC115213976      | TPM2              | 1 | 1 | 6  |
| 282. | A0A6P7T124           | Cytidine deaminase OS= <i>Octopus vulgaris</i>                                                                                                                                  | LOC115218070      | CDA               | 1 | 1 | 7  |
| 283. | A0A6P7S965           | Ras GTPase-activating protein-binding protein 2 OS= <i>Octopus vulgaris</i>                                                                                                     | LOC115210285      | G3BP2             | 1 | 1 | 3  |
| 284. | A0A0L8G235           | Malate dehydrogenase OS= <i>Octopus bimaculoides</i>                                                                                                                            | OCBIM_22001700mg  | MDH               | 1 | 1 | 3  |
| 285. | A0A6P7SVM1           | Protein-glucosylgalactosylhydroxylysine glucosidase isoform X2 OS= <i>Octopus vulgaris</i>                                                                                      | LOC115216968      | PGGHG             | 1 | 1 | 2  |
| 286. | A0A0L8I519           | Sulfotransfer_1 domain-containing protein OS= <i>Octopus bimaculoides</i>                                                                                                       | OCBIM_22034539mg  | DSEL              | 1 | 1 | 3  |
| 287. | A0A0L8G0N4           | Prolyl endopeptidase OS= <i>Octopus bimaculoides</i>                                                                                                                            | OCBIM_22003476mg  | FAP               | 1 | 1 | 2  |
| 288. | A0A6P7TDK5           | Mucin-5AC-like isoform X1 OS= <i>Octopus vulgaris</i>                                                                                                                           | LOC115222921      | MUC5AC            | 1 | 1 | 3  |
| 289. | A0A0L8FTG9           | Amine oxidase OS= <i>Octopus bimaculoides</i>                                                                                                                                   | OCBIM_22008553mg  | AOC1              | 1 | 1 | 4  |
| 290. | A0A0L8HNM9           | Uncharacterized protein (Fragment) OS= <i>Octopus bimaculoides</i>                                                                                                              | OCBIM_22010506mg  | OCBIM_22010506mg  | 1 | 1 | 8  |
| 291. | A0A6P7SMT0           | Dehydrogenase/reductase SDR family member 4 isoform X1 OS= <i>Octopus vulgaris</i>                                                                                              | LOC115214531      | DHRS4             | 1 | 1 | 4  |
| 292. | A0A812BGH7           | Proteasome subunit alpha type OS= <i>Sepia pharaonis</i>                                                                                                                        | SPHA_15160        | PSMA              | 1 | 1 | 4  |
| 293. | A0A6P7S417           | Chloride intracellular channel exc-4 OS= <i>Octopus vulgaris</i>                                                                                                                | LOC115208761      | exc-4             | 1 | 1 | 3  |
| 294. | A0A6P7TPC1           | Uncharacterized protein isoform X1 OS= <i>Octopus vulgaris</i>                                                                                                                  | LOC115224175      |                   | 1 | 1 | 1  |
| 295. | Cluster-58773.214625 | Hypothetical protein LOTGIDRAFT_226396 OS= <i>Lottia gigantea</i>                                                                                                               | LOTGIDRAFT_226396 | LOTGIDRAFT_226396 | 1 | 1 | 11 |
| 296. | A0A7E6FJ93           | Annexin OS= <i>Octopus vulgaris</i>                                                                                                                                             | LOC115223011      | ANXA1             | 1 | 1 | 2  |
| 297. | Q06268               | Omega-crystallin OS= <i>Enteroctopus dofleini</i>                                                                                                                               | LOC115217972      |                   | 1 | 1 | 2  |
| 298. | A0A7E6F0K3           | Phosphonoacetaldehyde hydrolase isoform X2 OS= <i>Octopus vulgaris</i>                                                                                                          | LOC115215216      | phnX              | 1 | 1 | 3  |

|      |                      |                                                                                          |                            |                          |   |   |    |
|------|----------------------|------------------------------------------------------------------------------------------|----------------------------|--------------------------|---|---|----|
| 299. | A0A7E6ENY1           | Titin-like OS= <i>Octopus vulgaris</i>                                                   | LOC118762203               | TTN                      | 1 | 1 | 3  |
| 300. | A0A6P7SZG0           | cAMP-regulated phosphoprotein 19 OS= <i>Octopus vulgaris</i>                             | LOC115217970               | arpp19                   | 1 | 1 | 13 |
| 301. | A0A7E6EY56           | Receptor expression-enhancing protein OS= <i>Octopus vulgaris</i>                        | LOC115213373               | REEP1                    | 1 | 1 | 4  |
| 302. | A0A6P7T976           | H(+)-transporting two-sector ATPase OS= <i>Octopus vulgaris</i>                          | LOC115221352               | ATP6V1A                  | 1 | 1 | 2  |
| 303. | A0A0L8GC35           | N-acyl-L-amino-acid amidohydrolase OS= <i>Octopus bimaculoides</i>                       | OCBIM_22036825mg           | ACY1                     | 1 | 1 | 3  |
| 304. | A0A6P7TDD8           | Guanine nucleotide-binding protein subunit beta-like protein OS= <i>Octopus vulgaris</i> | LOC115222872               | gnb1l                    | 1 | 1 | 5  |
| 305. | A0A0L8GMT0           | PKS_ER domain-containing protein OS= <i>Octopus bimaculoides</i>                         | OCBIM_22031489mg           | OCBIM_22031489mg         | 1 | 1 | 4  |
| 306. | A0A6P7SUN7           | Hydroxyacylglutathione hydrolase, mitochondrial isoform X1 OS= <i>Octopus vulgaris</i>   | LOC115216426               | hagh                     | 1 | 1 | 5  |
| 307. | A0A6P7TES8           | Uncharacterized protein OS= <i>Octopus vulgaris</i>                                      | LOC115222385               |                          | 1 | 1 | 8  |
| 308. | A0A0L8G659           | IF rod domain-containing protein OS= <i>Octopus bimaculoides</i>                         | OCBIM_22000068mg           | OCBIM_22000068mg         | 1 | 1 | 1  |
| 309. | A0A7E6FLF6           | Leukotriene A-4 hydrolase-like OS= <i>Octopus vulgaris</i>                               | LOC115223638               | lkhA                     | 1 | 1 | 2  |
| 310. | A0A0L8GSS4           | AAA domain-containing protein OS= <i>Octopus bimaculoides</i>                            | OCBIM_22029167mg           | OCBIM_22029167mg         | 1 | 1 | 3  |
| 311. | A0A6P7T7I9           | 60S ribosomal protein L17 OS= <i>Octopus vulgaris</i>                                    | LOC115220375               | RPL17                    | 1 | 1 | 5  |
| 312. | A0A0L8GW99           | Uncharacterized protein OS= <i>Octopus bimaculoides</i>                                  | OCBIM_22026800mg           | OCBIM_22026800mg         | 1 | 1 | 2  |
| 313. | A0A7E6FNE1           | Dystrophin isoform X4 OS= <i>Octopus vulgaris</i>                                        | LOC115232614               | Dmd                      | 2 | 1 | 0  |
| 314. | Cluster-58773.104829 | PREDICTED: Calumenin-like isoform X2 OS= <i>Aplysia californica</i>                      | N/A                        | CALU                     | 1 | 1 | 2  |
| 315. | A0A0L8I420           | Uncharacterized protein (Fragment) OS= <i>Octopus bimaculoides</i>                       | OCBIM_22037121mg           | OCBIM_22037121mg         | 1 | 1 | 6  |
| 316. | A0A6P7TN39           | Proteasome subunit beta OS= <i>Octopus vulgaris</i>                                      | LOC115223857               | PSMB                     | 1 | 1 | 4  |
| 317. | A0A0L8FMS3           | VWFC domain-containing protein OS= <i>Octopus bimaculoides</i>                           | OCBIM_22013879mg           | VWC2                     | 1 | 1 | 2  |
| 318. | A0A6P7T9M7           | Transgelin OS= <i>Octopus vulgaris</i>                                                   | LOC115221527               | SCP1                     | 1 | 1 | 2  |
| 319. | A0A0L8HS70           | XPGN domain-containing protein OS= <i>Octopus bimaculoides</i>                           | OCBIM_22007405mg           | ERCC5                    | 1 | 1 | 2  |
| 320. | A0A0L8IH79           | Uncharacterized protein OS= <i>Octopus bimaculoides</i>                                  | OCBIM_22005008mg           | OCBIM_22005008mg         | 1 | 1 | 2  |
| 321. | A0A6P7SJ72           | Glutamine--fructose-6-phosphate transaminase (isomerizing) OS= <i>Octopus vulgaris</i>   | LOC115213781               | GFPT1                    | 1 | 1 | 2  |
| 322. | A0A6P7UBL9           | Fatty-acid amide hydrolase 2 isoform X2 OS= <i>Octopus vulgaris</i>                      | LOC115232529               | FAAH2                    | 1 | 1 | 2  |
| 323. | A0A6P7TV68           | 26S proteasome non-ATPase regulatory subunit 6 OS= <i>Octopus vulgaris</i>               | LOC115229467               | PSMD6                    | 1 | 1 | 3  |
| 324. | Cluster-58773.94617  | E3 ubiquitin-protein ligase TRAF7 OS= <i>Crassostrea gigas</i>                           | LOC105328601               | TRAF7                    | 1 | 1 | 3  |
| 325. | A0A7E6EL05           | Uncharacterized protein isoform X1 OS= <i>Octopus vulgaris</i>                           | LOC115232539               |                          | 1 | 1 | 16 |
| 326. | Cluster-116787.2     | Hypothetical protein NEMVEDRAFT_v1g225725 OS= <i>Nematostella vectensis</i>              | GenBank:<br>GAMZ01000001.1 | NEMVEDRAFT_v1g225<br>725 | 1 | 1 | 2  |
| 327. | A0A7E6ENU9           | Tumor protein D52 isoform X12 OS= <i>Octopus vulgaris</i>                                | LOC115209283               | TPD52                    | 1 | 1 | 4  |
| 328. | A0A6P7U8T5           | Histone H2B OS= <i>Octopus vulgaris</i>                                                  | LOC115231513               | HTB1                     | 1 | 1 | 7  |
| 329. | A0A6P7TGU1           | Actin-interacting protein 1 isoform X1 OS= <i>Octopus vulgaris</i>                       | LOC115223147               | AIP1                     | 1 | 1 | 1  |
| 330. | A0A6P7SB76           | Epidermal retinol dehydrogenase 2 isoform X1 OS= <i>Octopus vulgaris</i>                 | LOC115210961               | SDR16C5                  | 1 | 1 | 5  |
| 331. | A0A7E6FD92           | Insulin-degrading enzyme OS= <i>Octopus vulgaris</i>                                     | LOC115219912               | IDE                      | 1 | 1 | 1  |

|      |                      |                                                                                         |                     |                  |   |   |    |
|------|----------------------|-----------------------------------------------------------------------------------------|---------------------|------------------|---|---|----|
| 332. | A0A0L8FU30           | Uncharacterized protein OS= <i>Octopus bimaculoides</i>                                 | OCBIM_22007941mg    | OCBIM_22007941mg | 1 | 1 | 7  |
| 333. | A0A6P7SQ23           | Reticulocalbin-2 isoform X2 OS= <i>Octopus vulgaris</i>                                 | LOC115215179        | RCN2             | 1 | 1 | 3  |
| 334. | A0A812BQ89           | Transaldolase OS= <i>Sepia pharaonis</i>                                                | SPHA_21947          | TALDO1           | 1 | 1 | 3  |
| 335. | A0A6P7SBT2           | Hydroxyacid-oxoacid transhydrogenase OS= <i>Octopus vulgaris</i>                        | LOC115210878        | ADHFE1           | 1 | 1 | 2  |
| 336. | A0A0L8HXN5           | SGL domain-containing protein OS= <i>Octopus bimaculoides</i>                           | OCBIM_22003174mg    | OCBIM_22003174mg | 1 | 1 | 5  |
| 337. | A0A0L8GIJ0           | VWFA domain-containing protein (Fragment) OS= <i>Octopus bimaculoides</i>               | OCBIM_22032938mg    | OCBIM_22032938mg | 1 | 1 | 3  |
| 338. | A0A6P7TAQ3           | Von Willebrand factor C domain-containing protein 2-like OS= <i>Octopus vulgaris</i>    | LOC115222123        | VWC2L            | 1 | 1 | 10 |
| 339. | A0A6P7SXS2           | Cell surface glycoprotein 1 isoform X6 OS= <i>Octopus vulgaris</i>                      | LOC115217577        | env              | 1 | 1 | 1  |
| 340. | A0A0L8IEQ2           | T-complex protein 1 subunit delta OS= <i>Octopus bimaculoides</i>                       | OCBIM_22015514mg    | Cct4             | 1 | 1 | 2  |
| 341. | Cluster-86046.0      | 14-3-3-like protein OS= <i>Physarum polycephalum</i>                                    | LOC115229933        | fttB             | 2 | 1 | 3  |
| 342. | Cluster-58773.110379 | AGAP011952-PA OS= <i>Anopheles gambiae</i> str. PEST                                    | CASPS3              | CASPS3           | 1 | 1 | 4  |
| 343. | A0A6P7S7T5           | Acid ceramidase-like OS= <i>Octopus vulgaris</i>                                        | LOC115209837        | ASAH1            | 1 | 1 | 2  |
| 344. | A0A812CTD3           | Hypothetical protein OS= <i>Sepia pharaonis</i>                                         | SPHA_40360          | ALDH1            | 2 | 1 | 4  |
| 345. | A0A6P7SZ60           | Aldehyde dehydrogenase, mitochondrial OS= <i>Octopus vulgaris</i>                       | LOC115217872        | ALDH2            | 1 | 1 | 3  |
| 346. | A0A6P7STJ4           | Carboxylic ester hydrolase OS= <i>Octopus vulgaris</i>                                  | LOC115216415        | ACHE             | 1 | 1 | 3  |
| 347. | Q24925               | Peroxidase-like protein (Fragment) OS= <i>Euprymna scolopes</i>                         | LOC115221592        |                  | 1 | 1 | 2  |
| 348. | A0A812DRM9           | Hypothetical protein OS= <i>Sepia pharaonis</i>                                         | SPHA_58637          |                  | 1 | 1 | 3  |
| 349. | Cluster-141421.4     | Hypothetical protein ACA1_115170 OS= <i>Acanthamoeba castellanii</i> str. Neff          | GenBank: KB007926.1 | ACA1_115170      | 1 | 1 | 3  |
| 350. | A0A0L8GKZ1           | Helicase C-terminal domain-containing protein OS= <i>Octopus bimaculoides</i>           | OCBIM_22031992mg    | OCBIM_22031992mg | 1 | 1 | 1  |
| 351. | A0A7E6EGR4           | Short-chain collagen C4-like OS= <i>Octopus vulgaris</i>                                | LOC118760927        | COL4A4           | 1 | 1 | 4  |
| 352. | A0A7E6FUS0           | Annexin OS= <i>Octopus vulgaris</i>                                                     | LOC115226900        | ANXA1            | 1 | 1 | 4  |
| 353. | A0A812EMG1           | DNAH OS= <i>Sepia pharaonis</i>                                                         | SPHA_78697          | DNAH             | 1 | 1 | 1  |
| 354. | Q5MX22               | Histone H3 (Fragment) OS= <i>Sepioteuthis lessoniana</i>                                | H3                  | H3               | 1 | 1 | 6  |
| 355. | A0A6P7U0P7           | Zinc finger ZZ-type and EF-hand domain-containing protein 1 OS= <i>Octopus vulgaris</i> | LOC115228010        | ZZEF1            | 1 | 1 | 0  |
| 356. | A0A0L8IDH2           | Non-specific serine/threonine protein kinase OS= <i>Octopus bimaculoides</i>            | OCBIM_22020713mg    | STK11            | 1 | 1 | 2  |
| 357. | A0A7E6FDU1           | Glucose-6-phosphate 1-dehydrogenase OS= <i>Octopus vulgaris</i>                         | LOC115220357        | G6PD             | 1 | 1 | 4  |
| 358. | A0A812CC32           | Cilia- and flagella-associated protein 65 OS= <i>Sepia pharaonis</i>                    | SPHA_36641          | Cfap65           | 1 | 1 | 13 |
| 359. | A0A7E6EW14           | Tetraspanin OS= <i>Octopus vulgaris</i>                                                 | LOC115212017        | TSPAN1           | 1 | 1 | 5  |
| 360. | Cluster-58773.161421 | PREDICTED: Troponin I-like OS= <i>Aplysia californica</i>                               | N/A                 | TNNI1            | 1 | 1 | 4  |
| 361. | A0A812DX04           | Hypothetical protein OS= <i>Sepia pharaonis</i>                                         | SPHA_61893          |                  | 1 | 1 | 3  |

**UPs** = Unique Peptides

**Cov. [%]** = Percentage of Protein Coverage

**PSMs** = Peptide Spectrum Matches
