# Supplementary material for: Insights into Common Octopus (Octopus vulgaris) Ink Proteome and Bioactive Peptides Using Proteomic Approaches
Source: Mar Drugs. 2023 Mar 24;21(4):206. doi: 10.3390/md21040206 (PMC10142993; doi:10.3390/md21040206)
Supplement: Supplementary file 1 [file marinedrugs-21-00206-s001.zip]

Archive with 9 entries (9 files):
- Supplementary Figure S1.png
- Supplementary Figure S2.png
- Supplementary File S1.xlsx
- Supplementary File S2.pdf
- Supplementary File S3.xlsx
- Supplementary File S4.pdf
- Supplementary File S5.pdf
- Supplementary File S6.pdf
- Supplementary File S7.xlsx
