# Supplementary material for: Insights into Common Octopus (Octopus vulgaris) Ink Proteome and Bioactive Peptides Using Proteomic Approaches
Source: Mar Drugs. 2023 Mar 24;21(4):206. doi: 10.3390/md21040206 (PMC10142993; doi:10.3390/md21040206)
Supplement: Supplementary file 1 [file marinedrugs-21-00206-s001.zip › Supplementary File S1.xlsx]

## Sheet: PROTEINS
Protein FDR Confidence: Combined	Master	Unique Sequence ID	Protein Group IDs	Accession	Description	Sequence	FASTA Title Lines	Exp. q-value: Combined	Sum PEP Score	# Decoy Protein: Combined	Coverage [%]	# Peptides	# PSMs	# Protein Unique Peptides	# Unique Peptides	# AAs	MW [kDa]	calc. pI	Score Sequest HT: Sequest HT	Coverage [%] (by Search Engine): Sequest HT	# PSMs (by Search Engine): Sequest HT	# Peptides (by Search Engine): Sequest HT	# Protein Annotation Groups	# Protein Pathway Groups	Found in File: [F1]	Found in File: [F2]	Found in File: [F3]	Found in Sample: [S1] F1: Sample	Found in Sample: [S2] F2: Sample	Found in Sample: [S3] F3: Sample	Found in Sample Group: [S1] F1: Sample	Found in Sample Group: [S2] F2: Sample	Found in Sample Group: [S3] F3: Sample	# Protein Groups
High	Master Protein	-656082086096573774	224	A0A6P7SER3	hemocyanin 1-like OS=Octopus vulgaris OX=6645 GN=LOC115212215 PE=4 SV=2	SISGNLIRKSVETLTEDEVLNLQVALRVMQDDASPTGFQAIAAYHGEPADCKAPDGSTVVCCLHGMPTFPLWHRLYLVQFEQAMASHGSTLGVPYWDWTQPVDHLPELVSHPLFMDPSSHKAKKNVFYSGDIAFEQKVTARAVDTRLFQSSKGGKNFLLDGILLALEQEDYCHFEVQFEVAHNPIHYLVGGRFAHSMSSLEYTSYDPLFFLHHSNVERLFVIWQALQKHRGLDGSANCGLNMFHKPMEPFGRDTNPISLTKDHAKAVDLFDYNELGYDYDDLHLNGMDIPQLDTLMKEHQQHPRAFANFRLGGIKTSANVRVAVCVPTDDKRHSDNCNNHVGSFFILGGVHEMTWNFGYPFLFEITDVVKSLGVPLDGNYYIHADVTAINGTLLPDGTI…	>tr|A0A6P7SER3|A0A6P7SER3_OCTVU hemocyanin 1-like OS=Octopus vulgaris OX=6645 GN=LOC115212215 PE=4 SV=2	0	1117.53	0	47	139	527	16	16	5821	666.2	6.15	1744.35	47	527	139	0	0	High	High	High	High	High	High	High	High	High	1
High	Master Protein	6524271959731192696	337	A0A6P7SDC4	hemocyanin G-type, units Oda to Odg OS=Octopus vulgaris OX=6645 GN=LOC115211670 PE=4 SV=2	MMKIPCLFAIVFAFWLCGHIAEGNLIRKSVETLTEDEVLNLQVALRAMQDDASPTGYQAIAAYHGEPADCKAPDGSTVVCCLHGMPTFPLWHRLYLVQFEQAMATHGSTLGVPYWDWTQPVDHLPELVSHPLFMDPSSHKAKKNVFYSGDIAFEQKVTARAVDTRLFQSSKGGKNFLLDGILLALEQEDYCHFEVQFEVAHNPIHYLVGGRFAHSMSSLEYTSYDPLFFLHHSNVERLFVIWQALQKHRGLDGSANCGLNMFHKPMEPFGRDTNPISLTKDHAKAVDLFDYNELGYDYDDLHLNGMDIPQLDTLMKEHQQHPRAFANFRLGGIKTSANVRVAVCIPTDDKRHSDNCNNHVGSFFILGGVHEMTWNFGYPFLFEITDVVKSLGVPLDGNY…	>tr|A0A6P7SDC4|A0A6P7SDC4_OCTVU hemocyanin G-type, units Oda to Odg OS=Octopus vulgaris OX=6645 GN=LOC115211670 PE=4 SV=2	0	1076.13	0	51	134	517	2	2	2916	334.1	6.2	1699.35	51	517	134	0	0	Not Found	High	High	Not Found	High	High	Not Found	High	High	1
High	Master Protein	7867452002549492558	351	Cluster-58773.162319;orf1 len=2921 frame:3 start:24 end:8786 gi	16596797 gb|AAK28276.2| hemocyanin G-type [Enteroctopus dofleini]	LEEAMMKIPCLFAIVFAFWLCGYIAEGNLIRKSVETLTEDEVLNLQVALRVMQDDASPTGYQAIAAYHGEPADCKAPDGSTVVCCLHGMPTFPLWHRLYLVHFEQAMATHGSTLGVPYWDWTQPVDHLPELVSHPLFMDPSSHKAKKNVFYSGDIAFEQKVTARAVDTRLFQSSKGGKNFLLDGILLALEQEDYCHFEVQFEVAHNPIHYLVGGRFAHSMSSLEYTSYDPLFFLHHSNVERLFVIWQALQKHRGLDGSANCGLNMFHKPMEPFGRDTNPISLTKDHAKAVDLFDYNELGYDYDDLHLNGMDIPQLDTLMKEHQQHPRAFANFRLGGIKTSANVRVAVCVPTDDKRHSDNCNNHVGSFFILGGVHEMTWNFGYPFLFEITDVVKSLGVPL…	>Cluster-58773.162319;orf1 len=2921 frame:3 start:24 end:8786 gi|16596797|gb|AAK28276.2| hemocyanin G-type [Enteroctopus dofleini]	0	1066.19	0	50	134	512	1	4	2920	334.6	6.18	1696.08	50	512	134	0	0	High	High	High	High	High	High	High	High	High	1
High	Master Protein	-4918161335732563708	134	Cluster-58773.132244;orf1 len=954 frame:2 start:176 end:3037 gi	159006 gb|AAA16244.1| peroxidase-like protein, partial [Euprymna scolopes]	SQQRQDFEQTCLDLRRTTMIRPSLILLLAILPCIVLCLTPLQDKQCQSVYAKASRIVRNKCLFRRYGSCSGRRHGGRRSGGRSGTSDAIDERQNNQAGANTRNGDNTANGANTANGANGANNAGTGNAVIDIGNLTPAAAAAATARTAAAAQAAAAVAANTAAAETANAEAANAAAAAAADAAIAAAAAAEEAAAIAAANPDDPEAVANATAAAAVAAEAAALAASTAAEAATANAAAAAAVAGAAAAAAAAVTAEDAAAAAAAAAADAAAAAAAAAAAAAANDTVVNGEAAVVLPDNQLAIAETGLVFVVTGRLIQQLLDDGAITAENLLPAVQPPLELVENCPFVEALTCDATVPYRSADGSCNNIQFPYLGRSNTPFDRYLPAIYEDDLSAPRATG…	>Cluster-58773.132244;orf1 len=954 frame:2 start:176 end:3037 gi|159006|gb|AAA16244.1| peroxidase-like protein, partial [Euprymna scolopes]	0	216.49	0	35	25	268	0	15	953	99.7	4.61	788.65	35	268	25	0	0	High	High	High	High	High	High	High	High	High	1
High	Master Protein	3106754013465050226	282	A0A6P7TQ10	uncharacterized protein LOC115225177 OS=Octopus vulgaris OX=6645 GN=LOC115225177 PE=4 SV=1	MKCFTLFLLLLGITFKITVAEVAVSSSKDLEVCLKKNAIDFSKFSEQEWLFFCMKYYLNKGVAETQSTEPKISLWADVRGRDYINSLIDRFSAEARNATSKRIRKEYRMLTDEERRNYHTAIRMLRDDTSVLPNKFEIIADLHNGQVTNSAHGGPGFLPWHRVYMMIWEEALREMIPSVVAPYWDVARDSALDDPRQSVIWSSTFQGSSEGLVTDGPFADFPTAFGPLLRSYGVFTHLPVFSDINLVFTQDTLAQISQITADHVRYIFEIYHNSIHDWIGGTVSIQAWASFDPAFLLIHGYVDYIWQRFQDKQLRDGINITGDYPLFHSLLQGTDFEADDPIGLIEGMSNAEAVAESIVYRNLIDYEDAQLECDLQNPCPSQFYQCVNNTCISMTREAN…	>tr|A0A6P7TQ10|A0A6P7TQ10_OCTVU uncharacterized protein LOC115225177 OS=Octopus vulgaris OX=6645 GN=LOC115225177 PE=4 SV=1	0	201.862	0	43	25	126	0	25	622	71.3	5.06	382.58	43	126	25	0	0	High	High	High	High	High	High	High	High	High	1
High	Master Protein	-5660821487844411885	113	A0A6P7SI10	CD109 antigen isoform X2 OS=Octopus vulgaris OX=6645 GN=LOC115213260 PE=4 SV=1	MKMRLAILWALSMALFANVQGDEIDEGHYMILVPRNFVHGKPNNISVTMYKTTEEESITFEVFRLNETYLTVETTVSPDSSKFVELTLPPELKEHYSVKIRATGRGAIEFNSTTSIWISKGDDIYTLNTQAIRAQLDRPFYSSSQWVRMRTFGLNMNLTTVQQPMNISVFDPNGNMLAKWTNEHSPSGVVSKSFQLSDKPTTGTWHFKICQGKDEAFVYFKVRSYSLPKFEVNVDAAHHIVDFSMGYLYLLHETFDVNVTAHYTFGKPVTGKLELNVSLGHRQEYTIHKVMNISGSVSVNIPFRELLESNDTIHVPQYRSYCNIPNIVIKAKVTEALTQKSMMSPEATIKVESAPIRVSHSSSRNLKYGLPNFSDVTIERIDGKPLTENDRMHPLKIKF…	>tr|A0A6P7SI10|A0A6P7SI10_OCTVU CD109 antigen isoform X2 OS=Octopus vulgaris OX=6645 GN=LOC115213260 PE=4 SV=1	0	194.929	0	37	45	107	0	36	1404	158.8	5.9	271.48	37	107	45	0	0	High	High	High	High	High	High	High	High	High	1
High	Master Protein	3637619678384607131	294	Q9BJ58	Hemocyanin G-type (Fragment) OS=Enteroctopus dofleini OX=267067 PE=4 SV=2	CLQGITMKILCLFAFVFAFWLSGQSAEGNLIRKDVDALSEDEVLNLQVALRAMQDDETPTGYQAIAAYHGEPADCKAPDGSTVVCCLHGMPTFPLWHRLYTVQFEQTMVGHGSKLGVPYWDWTQPLNHLPELVSHPLFMDPTAHKAKKNVFYSGNIAFEKKTTARAVDTRLFQASKGGKNFLLEGVLSALEQDDYCHFEVQFEVAHNPIHYLVGGRFTHSMSSLEYTSYDPLFFLHHSNVERLFTIWQALQKHRGIEGNANCGLNMFHKPMEPFGRDTNPISLTKEHAKAVDVFNYNELGYDYDDLHLNGMDIPELDTMLKERQQHPRSFANFRLGGIKTSANVRVAVCIPSEDKRHSDNCNNHVGSFFILGGVHEMTWDFGYPFLFEITDVVKSLGIP…	>tr|Q9BJ58|Q9BJ58_ENTDO Hemocyanin G-type (Fragment) OS=Enteroctopus dofleini OX=267067 PE=4 SV=2	0	164.884	0	13	34	103	1	1	2924	334.7	6.01	258.34	13	103	34	0	0	Not Found	Not Found	High	Not Found	Not Found	High	Not Found	Not Found	High	1
High	Master Protein	4201267643742402984	298	O61363	Hemocyanin G-type, units Oda to Odg OS=Enteroctopus dofleini OX=267067 GN=ODHCY PE=1 SV=1	NLIRKDVDALSEDEVLNLQVALRAMQDDETPTGYQAIAAYHGEPADCKAPDGSTVVCCLHGMPTFPLWHRLYTVQFEQTMVAHGSKLGVPYWDWTQPLNHLPELVSHPLFMDPTAHKAKKNVFYSGDIAFEKKTTARAVDTRLFQASKGGKNFLLEGVLSALEQDDYCHFEVQFEVAHNPIHYLVGGRFTHSMSSLEYTSYDPLFFLHHSNVERLFTIWQALQKHRGLDGNANCGLNMFHKPMEPFGRDTNPISLTKEHAKAVDVFNYNELGYDYDDLHLNGMDIPELDTMLKERQQHPRSFANFRLGGIKTSANVRVAVCIPSEDKRHSDNCNNHVGSFFILGGVHEMTWDFGYPFLFEITDVVKSLGIPLDGNYYVHADVTEINGTLLPDGTIPRPT…	>sp|O61363|HCYG_ENTDO Hemocyanin G-type, units Oda to Odg OS=Enteroctopus dofleini OX=267067 GN=ODHCY PE=1 SV=1	0	142.313	0	12	31	95	1	1	2896	331.7	5.97	226.19	12	95	31	0	0	Not Found	Not Found	High	Not Found	Not Found	High	Not Found	Not Found	High	1
High	Master Protein	3137368907608521136	283	Cluster-58773.88130;orf1 len=870 frame:3 start:327 end:2936 gi	762145751 ref|XP_011456155.1| PREDICTED: puromycin-sensitive aminopeptidase-like [Crassostrea gigas]	DMAERRPFEHLPSTVIPVNYALLFKPDLETFKFTGSGDIDVQIKEPVESFKLNAAELTVSKASFKYEGGEPVDLKISFVKENENVIFSSSSTFKAGFGVLHIEFAGELNDRMRGFYHSQYTVSSGRVVHLAVTQFESTDARRAFPCWDEPSFKATFDITLVFPNHLTGLSNMPVTEEKTHSTDPKLKVMKFERSPKMSTYLLAFIIGEFDYLEGRDSDNVLVRVYTPLEKRDQGQFALDVTVKTLPFYKSYFNIAYPLPKIDLIAIPDFLSGAMENWGLVTYRENTLLIDAEDSSAKSRQLVALVIGHELAHMWFGNLVTMEWWTHLWLNEGFASWIEYLCVDKLFPDFEIWTQFVTSDLAAALKLDALHTSHPIEVPVGHPAEVDEIFDAISYCKGAS…	>Cluster-58773.88130;orf1 len=870 frame:3 start:327 end:2936 gi|762145751|ref|XP_011456155.1| PREDICTED: puromycin-sensitive aminopeptidase-like [Crassostrea gigas]	0	133.397	0	37	30	58	0	30	869	99.1	5.69	167.48	37	58	30	0	0	Not Found	High	High	Not Found	High	High	Not Found	High	High	1
High	Master Protein	5099840612130945732	312	A0A6P7U7W9	putative aminopeptidase W07G4.4 isoform X1 OS=Octopus vulgaris OX=6645 GN=LOC115232621 PE=3 SV=1	MASTRLTPELLATSDVADSRFDCVVLVTNCIKNLDGNPGFSSLKETLTEYSQVGDLKELTVLHCSALPSKRLIWSPTGPINRDYDDVRRWSDAAEKGIKKSTALKCKKPLLVPVVKGSFEQSHRVTILGALQGLYVPIEIREDVPERAVKAEKLGVWFSDASVADKELLVCTALEEGRVVTRDIGGSDPERMAAPKVAEYVKKVLGGSNSDIKITVQSNVGELEKSYPLLGAVNRATRNLERHAARVLLLEYTGSGSTEENVYLVGKGITYDTGGHDIKAGGHMAGMHRDKCGAAAVAGFFKVLSILKPKGIKVTGSMSMVRNSVGPDGYVADEIVTSRSNVRVRVGNTDAEGRMVMADLLCYMKEQAKGVKNAHIFTIATLTGHAVLAMGPDYTAVMD…	>tr|A0A6P7U7W9|A0A6P7U7W9_OCTVU putative aminopeptidase W07G4.4 isoform X1 OS=Octopus vulgaris OX=6645 GN=LOC115232621 PE=3 SV=1	0	108.668	0	61	23	36	0	23	519	55.9	7.91	108.62	61	36	23	0	0	Not Found	High	High	Not Found	High	High	Not Found	High	High	1
High	Master Protein	-6642562329399759858	87	A0A6P7T042	LOW QUALITY PROTEIN: paramyosin-like OS=Octopus vulgaris OX=6645 GN=LOC115218392 PE=4 SV=1	MDIDSDISVKRTYRRYEVYRGQSPTSQSRTEIVKTRHIGFDQSEIDRAEARFRLRIRELEDALDSERDSRIRFEKLAAEHAILIDSLNERLEDVGLTSISQSELARKKDSEVIKLRKDLDLAITQHESTEQSLRKRHQETINDLSEQNDYLTKQKNRIDKEKSQLLIEIDGLQTTLDSVSKARAAAESKLDGLDGQVGRLRITVDDLTKQLNDANHAKARLTQENFDYQHQVQELDSANAALAKAKMQLQAQVDDLKRSLDDESRQRSNLSAQLAALQLDFDNLNARYEEESESNTVLRNQLSKINAEYSALKTRFDKEILAKTEELEDLKRRMNLKVSELEDLLEQSRVRINNLEKTKIKLTTEIKELTIEIENIQIIVQELTKKNRQLENENASLGK…	>tr|A0A6P7T042|A0A6P7T042_OCTVU LOW QUALITY PROTEIN: paramyosin-like OS=Octopus vulgaris OX=6645 GN=LOC115218392 PE=4 SV=1	0	106.792	0	28	25	33	0	4	884	102.3	5.82	111.12	28	33	25	0	0	Not Found	High	Not Found	Not Found	High	Not Found	Not Found	High	Not Found	1
High	Master Protein	8099469304818714901	356	A0A7E6ET70	tropomyosin Tod p 1.0102 isoform X27 OS=Octopus vulgaris OX=6645 GN=LOC115210626 PE=3 SV=1	MDAIKKKMLAMKMERELATDKAEQTDQKLRDTEDNKNKLEEDLTTLQKKFSNLENDFDNAKEQLAEANQKLETSEKRVGECESEIAGLNRRIQLLEEDLERSEERLSTAQTKLDEASKAADESERGRKVLENRSQGDEERIDLLEKQLEEAKWIAEDADRKFDEAARKLAITEVDLERAEARLEAAEARAKQLEEEMTLINRNLKTLQIKEVEASQREDSYEETIRDLTHRLKEAENRAAEAERTVSKLQKEVDRLEDELLAEKERYKAISDELDQTFAELAGY	>tr|A0A7E6ET70|A0A7E6ET70_OCTVU tropomyosin Tod p 1.0102 isoform X27 OS=Octopus vulgaris OX=6645 GN=LOC115210626 PE=3 SV=1	0	106.545	0	49	23	30	0	4	284	32.9	4.74	105.99	49	30	23	0	0	Not Found	High	Not Found	Not Found	High	Not Found	Not Found	High	Not Found	1
High	Master Protein	1235516837682614592	251	A0A7E6EW98	10-formyltetrahydrofolate dehydrogenase OS=Octopus vulgaris OX=6645 GN=LOC115216749 PE=3 SV=1	MRIAIIGQSVFGAEVYNLLRKSGHEIAGVFTIPDVKGREDPLAAQAHKNGTPVFKYKRWQEKKVPIPEVVEQYKSLNVELNVLPFCSQFIPTEVIFYPKHQTIVYHPSILPHHRGASAINWSLIEGDTKTGFTIFWADDGLDTGPILLQRHTYITPDDTVETLYNRFLFPEGIKAMDYAVKLISENRAPKIIQPEEGASYEALLKKSLVKINWDQPAEAIHNYIRGNDKVPGAWATIDGQQVTFSGSKLWNRLVPRGTEVAIEGCSKPAIVHKNGMILFGNDNKMVNVSQLQLASGKMIKASKYGKVDDSAEKLELTAEEVSMESNLKEIWKAILNIEIEDTTDFFKAGAGSMDVVRLVEEIKEKCGGVALENEHIYMNTTFAELSNYIILRSRGITDE…	>tr|A0A7E6EW98|A0A7E6EW98_OCTVU 10-formyltetrahydrofolate dehydrogenase OS=Octopus vulgaris OX=6645 GN=LOC115216749 PE=3 SV=1	0	104.029	0	34	26	47	0	26	900	99.5	6.09	130.68	34	47	26	0	0	High	High	High	High	High	High	High	High	High	1
High	Master Protein	-3652123657670208318	162	Cluster-58773.164376;orf1 len=615 frame:1 start:1 end:1845 gi	762093591 ref|XP_011429255.1| PREDICTED: paramyosin-like isoform X1 [Crassostrea gigas]	RSNLSAQLAALQLDFDNLNARYEEESESNTVLRNQLSKINAEYSALKTRFDKEILAKTEELEDLKRRMNLKVSELEDLLEQSRVRINNLEKTKIKLTTEIKELTIEIENIQIIVQELTKKNRQLENENASLGKRVEELQAENANLLSANRNLEQENHRLKVSNAELGERVDNLTRENKQLTDNLRETVNALKDANRQLAELQALRAQLEAERDSLTIALRDTEESLRDAENKLQAATTALNQLRSEMENRLREKDEEIESIRKSSARAIEELQRTLVEVETRYKSELNRLKKKYETDIRELETALDVSNRQNAEHIKVIKTLHIKIKEIETRLEEEHRISEDLRSSLSVSERKRISLQTELEDCRSLLETAERSRKNAENELHETTSRLSECQLLITSL…	>Cluster-58773.164376;orf1 len=615 frame:1 start:1 end:1845 gi|762093591|ref|XP_011429255.1| PREDICTED: paramyosin-like isoform X1 [Crassostrea gigas]	0	103.247	0	35	25	33	1	1	614	71.4	5.58	108.86	35	33	25	0	0	Not Found	High	Not Found	Not Found	High	Not Found	Not Found	High	Not Found	1
High	Master Protein	-5293477071317799894	120	A0A7E6EQL5	tropomyosin Tod p 1.0102 isoform X3 OS=Octopus vulgaris OX=6645 GN=LOC115210626 PE=3 SV=1	MDAIKKKMLAMKMERELATDKAEQTDQKLRDTEDNKNKLEEDLTTLQKKFSNLENDFDNAKEQLAEANQKLETSEKRVGECESEIAGLNRRIQLLEEDLERSEERLSTAQTKLDEASKAADESERGRKVLENRSQGDEERIDLLEKQLEEAKWIAEDADRKFDEAARKLAITEVDLERAEARLEAAEAKIVELEEELKVVGNNMKSLEISEQEASQREDSYEETIRDLTHRLKEAENRTECAERECNLLHKGKAVLEGDLEKEQLKTKKLQEEMQQTYMEIHELMQ	>tr|A0A7E6EQL5|A0A7E6EQL5_OCTVU tropomyosin Tod p 1.0102 isoform X3 OS=Octopus vulgaris OX=6645 GN=LOC115210626 PE=3 SV=1	0	102.99	0	49	21	29	0	3	286	33.2	4.74	102.9	49	29	21	0	0	Not Found	High	High	Not Found	High	High	Not Found	High	High	1
High	Master Protein	-141903374287575966	232	Cluster-58773.13946;orf1 len=533 frame:1 start:406 end:2004 gi	260800011 ref|XP_002594930.1| hypothetical protein BRAFLDRAFT_209115 [Branchiostoma floridae]>gi|229280168|gb|EEN50941.1| hypothetical protein BRAFLDRAFT_209115 [Branchiostoma floridae]	EKEIEMNTAKEYITLDGYSLTTSALLQLGKGEHLLKISDDALERVRKSRDLLNDIVAKNQVAYGVTTGFGNFARTIIPPNQLAELQENLIRSHSAGVGESITLERIRMLLALRINVLAKGYSGISLENLKKYVNAFNNSLLPWVPEKGTVGASGDLAPLSHLALGMMGEGTMWSPRTGWADAKDVLKTYNLQPIKLGPKEGLALINGAQFITALGSEALERAEAITRQADIVAAVSFEALKGTTKAYDEDIHKARPHLGQIKVASRLRSILHSDLYPSQITESEFANNKVQDAYTLRCIPQVHGVVNDTNAFVRTILATELNSAGDNPMVFAERGEILSGGNFHGEYPAKANDYLAIGVHELANISERRIERLVNKPLGNLPPFLTENGGLNSGFMIAH…	>Cluster-58773.13946;orf1 len=533 frame:1 start:406 end:2004 gi|260800011|ref|XP_002594930.1| hypothetical protein BRAFLDRAFT_209115 [Branchiostoma floridae]>gi|229280168|gb|EEN50941.1| hypothetical protein BRAFLDRAFT_209115 [Branchiostoma floridae]	0	101.85	0	44	18	40	0	18	532	58.1	6.27	122.57	44	40	18	0	0	Not Found	High	High	Not Found	High	High	Not Found	High	High	1
High	Master Protein	-7320733556393788139	66	Cluster-58773.74875;orf1 len=741 frame:2 start:1832 end:4054 gi	159006 gb|AAA16244.1| peroxidase-like protein, partial [Euprymna scolopes]	RNRIHHFPTNICTKLTNNNILLLLTTLGILLSFINPEAEAISESLQSTPDAPTDLENIQGKEKKGYAYTSKAKTRPSSYFHGKHNKFFGNRDMEDEIGKSGSKFIQLMKEMRLRQNETETSTTEQSNAEVMLLATCSFTTPITCDPDSLYRTADGSCNNLENPYWGKGVTPFNRFQTPEYFDGLFLPRNTSVTGVALPEPRAVTIVMHRNSRISDLSQDVTHFTMIFGQFLNHDMLSTATFRNGLDCCTAEDVEQCMPILLPNDDPYFGAFNRDCLPFTRALATPPLNCQPGAKEVLNSQTSFIDCSQVYGSTREQSLSLRTMANGLLLTTSAEDLDLLPVNNSSFCRVPDNFCFITGDARANQNNMLLTLHTIFLREHNRIARFLGVVNPSLDDEELF…	>Cluster-58773.74875;orf1 len=741 frame:2 start:1832 end:4054 gi|159006|gb|AAA16244.1| peroxidase-like protein, partial [Euprymna scolopes]	0	94.095	0	30	19	53	0	3	740	83.2	5.57	144.13	30	53	19	0	0	High	Not Found	High	High	Not Found	High	High	Not Found	High	1
High	Master Protein	5368739229164810683	316	A0A0L8FXZ4	Uncharacterized protein OS=Octopus bimaculoides OX=37653 GN=OCBIM_22004572mg PE=4 SV=1	MAVWLDDGAITAENLLPAVQPPLELVENCPFVEALTCDVAAPYRSADGSCNNIQFPYLGRSNTPFDRYLPAVYEDDLSAPRATGVNGGNLPGARLVSTTFHGASTEENVNPDFTHLKTMFGVFLNHDLQDYPAMPTSGCSVDRINWNPRRRPREQLNGATSYIDASQVYGSDLTRQTTLRTMTGGLMRTTPTDDLDLLPQSNTTFCLASEGNLCFIGGRCIYIRETGKSSLCFLQWTHFRDVDEMHCGNYSGSTEVNQAFYPSWGRYIKYKNYSSRLAETLKCGTKYLAIFVPPLTVLGSNLITANLVGDNRVNVQPMMMSQHTLFLREHNRVANVLSTAQPDWTDEIVFQEARKIVISEMQHIAYDEYLPKVLGPDIMNTYNLNSLTEGYSLYIGNIN…	>tr|A0A0L8FXZ4|A0A0L8FXZ4_OCTBM Uncharacterized protein OS=Octopus bimaculoides OX=37653 GN=OCBIM_22004572mg PE=4 SV=1	0	94.043	0	23	12	117	2	2	695	76.5	4.86	333.78	23	117	12	0	0	High	High	High	High	High	High	High	High	High	1
High	Master Protein	1997482713186689748	266	A0A7E6EQM0	tropomyosin Tod p 1.0102 isoform X10 OS=Octopus vulgaris OX=6645 GN=LOC115210626 PE=3 SV=1	MDAIKKKMLAMKMERELATDKAEQTDQKLRDTEDNKNKLEEDLTTLQKKFSNLENDFDNAKEQLAEANQKLETSEKRVGECESEIAGLNRRIQLLEEDLERSEERLSTAQTKLDEASKAADESERGRKVLENRSQGDEERIDLLEKQLEEAKWIAEDADRKFDEAARKLAITEVDLERAEARLEAAEARAKQLEEEMTLINRNLKTLQIKEVEASQREDSYEETIRDLTHRLKEAENRTECAERECNLLHKGKAVLEGDLEKEQLKTKKLQEEMQQTYMEIHELMQ	>tr|A0A7E6EQM0|A0A7E6EQM0_OCTVU tropomyosin Tod p 1.0102 isoform X10 OS=Octopus vulgaris OX=6645 GN=LOC115210626 PE=3 SV=1	0	93.787	0	48	20	26	0	0	286	33.4	4.84	89.72	48	26	20	0	0	Not Found	Not Found	Not Found	Not Found	Not Found	Not Found	Not Found	Not Found	Not Found	1
High	Master Protein	6264694873288690446	333	A0A6P7TRC4	myosin heavy chain, striated muscle OS=Octopus vulgaris OX=6645 GN=LOC115225111 PE=3 SV=2	YHLFLSFPIFLQTYSGLFCVAINPYRRLPIYGQNLVDKYRGKRKAEMPPHLFSVADNAYQYMLQDRENQSMLITGESGAGKTENTKKVIQYFALVAATLDGKKKKDDEEKKKDEKKGTLEDQIVQCNPVLEAYGNAKTTRNNNSSRFGKFIRIHFGTQGKIAGADIETYLLEKSRVTFQQTVERNYHIFYQLLTPTFPDVIEKMLCTQDPGLYSFINQGALTVDGIDDDAEMVLTDTAFDVLGFTDEEKMSMYKCTGCILHLGEMKFKQRGEQAEADGTAEAEKVAFLLGVNAGDLLKCLLKPKIKVGTEYVTQGRNKNQVMNSISALAKSLYDRMFNWLVKRVNHTLDTKTKRQFFIGVLDIAGFEIFDFNSFEQLCINYTNERLQQFFNHHMFVLEQ…	>tr|A0A6P7TRC4|A0A6P7TRC4_OCTVU myosin heavy chain, striated muscle OS=Octopus vulgaris OX=6645 GN=LOC115225111 PE=3 SV=2	0	91.481	0	12	23	28	0	23	1875	215.4	5.85	85.68	12	28	23	0	0	Not Found	High	Not Found	Not Found	High	Not Found	Not Found	High	Not Found	1
High	Master Protein	1019688477585117551	248	A0A0L8G7X1	Uncharacterized protein OS=Octopus bimaculoides OX=37653 GN=OCBIM_22038393mg PE=4 SV=1	MDIDSDISVKRTYRRYEVYRGQSPTSQSRTELRIRELEDALDSERDSRIRFEKLAAEHVILIDSLNERLEEAGLTSISQSELTRKKDSEVNKLRKDLDLAITQHESTEQSLRKRHQETINDLSEQNDYLTKQKNRIDKEKSQLLIEIDGLQTTLDSVSKARQRSNLSAQLAALQLDFDNLNARYEEESESNTTLRNQLSRINAEYSALKTRFDKELLAKTEELEDLKRRMNLKVSELEDLLEQSRVRINNLEKTKIKLTTEIKELTIEIENIQIIVQELTKKNRQLENENASLGKRVEELQAENANLLSANRNLEQENHRLKVSNAELGERVDNLTRENKQLTDNLRETVNALKDANRQLAELQALRAQLEAERDSLTIALRDTEESLRDAENKLQAAT…	>tr|A0A0L8G7X1|A0A0L8G7X1_OCTBM Uncharacterized protein OS=Octopus bimaculoides OX=37653 GN=OCBIM_22038393mg PE=4 SV=1	0	88.919	0	25	24	31	2	2	776	90.3	5.57	101.23	25	31	24	0	0	Not Found	High	Not Found	Not Found	High	Not Found	Not Found	High	Not Found	1
High	Master Protein	150708882542924523	238	A0A0L8FFZ3	Tyrosinase_Cu-bd domain-containing protein (Fragment) OS=Octopus bimaculoides OX=37653 GN=OCBIM_22022789mg PE=4 SV=1	GKISFLNSETKRDPQPKLFGNKYLYEHTLFVLEQTDFCEFEVHFEVLHNTIHSWLGGRDPHSMSSLDFTAYDPIFFLHHSNVDRIWAIWQELQRYRKLPYNEANCALPLLNVPMRPFSNTTANHDRMTLTHSTPNDVFDYQNVLHYKYDTLTFFDLTITQLEHLIEERKAHDRIFAGFLLHGVKASADVHIYICVPTSKYEENCAHEAGVFSVLGGESEMPWQFDRVFRYEITDQLKLLGLNQNSHFRVKTEVTAVNGSSIHAKIFPHPTIIYVPKQGHSADFKHEEGNGNLVRKNVERLSLSEMNSLVHALKRMQKD	>tr|A0A0L8FFZ3|A0A0L8FFZ3_OCTBM Tyrosinase_Cu-bd domain-containing protein (Fragment) OS=Octopus bimaculoides OX=37653 GN=OCBIM_22022789mg PE=4 SV=1	0	88.823	0	30	8	41	1	1	318	37	6.8	130.09	30	41	8	0	0	Not Found	High	High	Not Found	High	High	Not Found	High	High	1
High	Master Protein	7270143649816139521	347	A0A7E6FFI6	chorion peroxidase-like OS=Octopus vulgaris OX=6645 GN=LOC115221248 PE=4 SV=1	MLLATCSFTTPITCDPDSLYRTADGSCNNLENPYWGKGVTPFNRFQTPEYFDGTLSVPSSKHQCYRGALPEPRAVTIVMHRNSRISDLSQDVTHFTMIFGQFLNHDMLSTATFRNGLDCCTAEDVEQCMPIFLPNDDPYFGAFNRDCLPFTRALATPPLNCQPGAKEVLNSQTSFIDCSQVYGSTREQSLSLRTMANGLLLTTSAEDLDLLPVNNSPSVEYRTISVLSLRPTEIMDIIQPFLIHPWSPVSDARANQNNMLLTLHTVFLREHNRIARFLGVVNPSLDDEELFQESRRINIAQMQNIVYREYLPRILGVSAMRSHGLQLLNSGFEEYNLNINPAINVAFSGAAFRFGHSTIRSSFSNGIGQQILLSPSFNTNDPFYVIDNAVGNFIRGLLV…	>tr|A0A7E6FFI6|A0A7E6FFI6_OCTVU chorion peroxidase-like OS=Octopus vulgaris OX=6645 GN=LOC115221248 PE=4 SV=1	0	79.375	0	30	17	48	1	1	632	71.1	5.31	122.71	30	48	17	0	0	High	Not Found	High	High	Not Found	High	High	Not Found	High	1
High	Master Protein	8900818470057015922	371	I0JGT9	Actin I OS=Sepia officinalis OX=6610 GN=ACTI PE=2 SV=1	MCDDDVAALVVDNGSGMCKAGFAGDDAPRAVFPSIVGRPRHQGVMVGMGQKDSYVGDEAQSKRGILTLKYPIEHGIVTNWDDMEKIWHHTFYNELRVAPEEHPVLLTEAPLNPKANREKMTQIMFETFNAPAMYVAIQAVLSLYASGRTTGIVLDSGDGVTHTVPIYEGYALPHAILRLDLAGRDLTDYLMKILTERGYSFTTTAEREIVRDIKEKLCYVALDFEQEMATAASSSSLEKSYELPDGQVITIGNERFRCPESLFQPSFLGMESAGIHETTYNSIMKCDVDIRKDLYANTVLSGGTTMFPGIADRMQKEITSLAPSTMKIKIIAPPERKYSVWIGGSILASLSTFQQMWISKQEYDESGPSIVHRKCF	>tr|I0JGT9|I0JGT9_SEPOF Actin I OS=Sepia officinalis OX=6610 GN=ACTI PE=2 SV=1 >tr|A0A0L8HIZ8|A0A0L8HIZ8_OCTBM Uncharacterized protein OS=Octopus bimaculoides OX=37653 GN=OCBIM_22013417mg PE=3 SV=1 >tr|A0A6P7U2X7|A0A6P7U2X7_OCTVU actin, adductor muscle OS=Octopus vulgaris OX=6645 GN=LOC115232513 PE=3 SV=1	0	69.917	0	40	13	23	0	2	376	41.8	5.48	64.53	40	23	13	0	0	Not Found	High	Not Found	Not Found	High	Not Found	Not Found	High	Not Found	1
High	Master Protein	8537878251761396167	364	Cluster-58773.163468;orf1 len=382 frame:1 start:88 end:1233 gi	410935705 gb|AFV94409.1| thioester-containing protein 1 [Euprymna scolopes]	RPFNKHFLRIFQGGASEGTAMTAYILLSLLEYKDLIDTHEHLESTRNSTDEAIALAEMYLRSVPGNMYSKAIFMYANALLGNDESFEELRTELENNAIIEGDFKYWKSMKVKRSWYAEDEYVEEPDVEMSAYVLLAYAKRNEVEKGLPILRWLVKMRSSLGGYDSTQSTVIALQALSQFAPLISSCCDQSVTINVVDNTGYSYSFPTINSETNTILYKHVMPPDTTSITFKGEGKGFVLVQTSWQYNILKEEESKSNIVSSVQANCTSSQRFNLQICSTWLANETSGMGLIEIQLPSGYVVDTGKYLSLPFVKRIELEDSIVNIYLDEVPREKYCFTVEAEKWYEINNRKVAQAVTTSLFYDSSESTVKTYEIDCSAQSSN	>Cluster-58773.163468;orf1 len=382 frame:1 start:88 end:1233 gi|410935705|gb|AFV94409.1| thioester-containing protein 1 [Euprymna scolopes]	0	69.824	0	34	12	25	0	3	381	43.2	4.87	72.21	34	25	12	0	0	High	High	High	High	High	High	High	High	High	1
High	Master Protein	-8616832326503883276	29	A0A6P7SKQ4	actin, cytoplasmic OS=Octopus vulgaris OX=6645 GN=LOC115214120 PE=3 SV=1	MDDEVAALVIDNGSGMCKAGFAGDDAPRAVFPSIVGRPRHQGVMVGMGQKDSYVGDEAQSKRGILTLKYPIEHGIVTNWDDMEKIWHHTFYNELRVAPEEHPVLLTEAPLNPKANREKMTQIMFETFNTPAMYVAIQAVLSLYASGRTTGIVLDSGDGVTHTVPIYEGYALPHAIMRLDLAGRDLTDYLMKILTERGYSFTTTAEREIVRDIKEKLCYVALDFEQEMQTAASSSSLEKSYELPDGQVITIGNERFRAPEAMFQPSFIGMESAGVHETTYNSIMKCDVDIRKDLYANTVLSGGSTMYPGIADRMQKEISALAPPTMKIKIIAPPERKYSVWIGGSILASLSTFQQMWISKQEYDESGPSIVHRKCF	>tr|A0A6P7SKQ4|A0A6P7SKQ4_OCTVU actin, cytoplasmic OS=Octopus vulgaris OX=6645 GN=LOC115214120 PE=3 SV=1	0	66.587	0	38	13	25	0	2	375	41.7	5.48	66.07	38	25	13	0	0	Not Found	High	Not Found	Not Found	High	Not Found	Not Found	High	Not Found	1
High	Master Protein	1569683657562515474	258	A0A7E6FE51	filamin-A isoform X1 OS=Octopus vulgaris OX=6645 GN=LOC115220251 PE=3 SV=1	MASQSEAYYDDDEDYDEDDEDMPATERDLADDAQWKLIQKNTFTRWANEHLKTVSKQLMDLETDLSDGLRLIALVEVLSSKKFKFINKKPNFRTQKLENVTRVLKFLEEDEGIRIVNIDSGDIVDQKLKLILGLIWTLILHYSISMPMWEGEEPAPGAGGPTPKQRLLNWIQGKCGDLPINNFTTDWNDGRAIGALVDACGPGLCPDWADWAPKNKLKNAKEAMEAAEKWLDVPQLIKPAEMNNPKIDEMSMMTYLSQFPNCKLNPQAPLRPRLNPNRVRAYGPGIEPTGNTKGAKTSFTVETFSAGQGTLEPLVLNPKGQKEPCEVVFNQDKHLTYTCTYTPKVEGSYKVIIKYSGKEIPKSPFPVAVSAPAGDPSKVKAAGPGLEPGNVVSVVTHFT…	>tr|A0A7E6FE51|A0A7E6FE51_OCTVU filamin-A isoform X1 OS=Octopus vulgaris OX=6645 GN=LOC115220251 PE=3 SV=1	0	61.646	0	9	17	18	0	17	2430	260.4	6.43	57.45	9	18	17	0	0	Not Found	High	Not Found	Not Found	High	Not Found	Not Found	High	Not Found	1
High	Master Protein	1830748037823445670	262	A0A0L8H9P1	Uncharacterized protein OS=Octopus bimaculoides OX=37653 GN=OCBIM_22019540mg PE=3 SV=1	MGYKSLALLSAVHCRTFLQLVKSICSYRLSRYNHFLPYTAAFFCSQSKNMSDLKELWETLKKADSKSLLKKHLTPARYEKLKNKKTKFGGTLADCIRSGCKNPDSGVGIYASDPDAYTVFAEVLDAVIMDYHKIDKVSHPVPDFGDVNNLNIGDLDPSGNLIVSTRVRVGRSHDSFGFPPVLKKEDRVKMEQVSVEALKSLDGELAGSYYPLSNMTPEVQKQLTDDHFLFNDSDRFLKAASGYDDWPVGRGIYFSANKTFLCWVNEEDHLRLISMQKGGNLGEVYKRLVNAIHQMEKKLKFAKKDNMGYLTFCPSNLGTTMRASVHIKIPKLSQRPDFKSICDKYNLQARGIHGEHTESVGGVYDISNKRRMGLTEYEAVTEMMRGVNEIIREETSS	>tr|A0A0L8H9P1|A0A0L8H9P1_OCTBM Uncharacterized protein OS=Octopus bimaculoides OX=37653 GN=OCBIM_22019540mg PE=3 SV=1	0	57.737	0	31	12	19	0	6	397	44.8	8.68	65.26	31	19	12	0	0	Not Found	High	Not Found	Not Found	High	Not Found	Not Found	High	Not Found	1
High	Master Protein	-5237418277409483255	124	A0A6P7TXP9	uncharacterized protein LOC115231284 OS=Octopus vulgaris OX=6645 GN=LOC115231284 PE=4 SV=1	MYIMTAGTCKKSKLDISWLQGTELPHCIPSNAHLDREIYLGGPHEDIEVMTYTHAVKHGVRHLTVSAHHCYPIQEVFYFRDSSVSDKSTGNGTIAQVKNLKLSVDDPSVFEIPDICHKAPISPAPEMPLTLGLLPNFAKHFDY	>tr|A0A6P7TXP9|A0A6P7TXP9_OCTVU uncharacterized protein LOC115231284 OS=Octopus vulgaris OX=6645 GN=LOC115231284 PE=4 SV=1	0	54.908	0	57	5	17	5	5	143	16	6.67	62.99	57	17	5	0	0	Not Found	High	High	Not Found	High	High	Not Found	High	High	1
High	Master Protein	-6613637574648794134	89	Cluster-58773.141566;orf1 len=422 frame:2 start:2 end:1267 gi	405964948 gb|EKC30386.1| Fructose-bisphosphate aldolase [Crassostrea gigas]	LLLKQGQPCLNSAKLFSCHNFSDFVDLESPSDLSSNSSLVDPDQPTTPATMSKCAFSNMPGFAPYLTPEQEAELKQIAAAIVAPGKGILAADESTGSMGKRLTAINVENTEENRRRYRELLFTADRECAKYISGVIMFHETFYQKTSAGVPFVKVLQDKGIIPGIKVDKGVVPLMGTFNECTTQGLDGLAERCAEYKKGGAQFAKWRSVLKIGSCTPSYQAMMENANVLARYAMICQQNGLVPIVEPEVLPDGEHDLETSQKVTEVVLAFTYKALADHHIFLEGTLLKPNMCTAGHSCPKKFAPEQNATATVTALRRTVPSAVPGVTFLSGGQSEEDATINLNAINTCALLKPWALTFSYGRALQASVLKAWQGKDENVEAAQKELLVRAKANSEAAVG…	>Cluster-58773.141566;orf1 len=422 frame:2 start:2 end:1267 gi|405964948|gb|EKC30386.1| Fructose-bisphosphate aldolase [Crassostrea gigas]	0	46.988	0	23	10	20	0	10	421	45.4	6.44	62.77	23	20	10	0	0	Not Found	High	High	Not Found	High	High	Not Found	High	High	1
High	Master Protein	-4729329313691500025	136	A0A6P7SAW7	transketolase OS=Octopus vulgaris OX=6645 GN=LOC115210747 PE=4 SV=1	MPADYHRPDAKIVSELKDIANKLRIHSIKATDASNSGHPSSCSSAAEIMSVLFFHTMKYDIKNPRGASNDRFILSKGHAAPILYAAWAEAGLFPTEDLLNLRKITSDLEGHPTPRLNFIDVGTGSLGQGLSIAAGMAYTGKYFDKADYRVYCLIGDGESAEGSIWEAMAFASYYKLDNLVAILDVNRLGQSDPTPLQHDVEVYKKRCEAFGWNTCITDGHDVDSLCKVFHQASLVEGKPTCIVAKTFKGKNIPGVEDLENWHGKPLTKISDGILTHLKNLLNNPGPHQLTIKSPEKTIPETDLSEVKLSELPAYELGQQVATRAAYGTALVKIGKSCKYVVAMDGDTKNSTFSQTFMKAFPGRFIECYIAEQNLVGVGIGCACRDRTIPFISTFACFLS…	>tr|A0A6P7SAW7|A0A6P7SAW7_OCTVU transketolase OS=Octopus vulgaris OX=6645 GN=LOC115210747 PE=4 SV=1	0	42.602	0	19	10	17	0	10	627	67.9	6.89	49.8	19	17	10	0	0	Not Found	High	High	Not Found	High	High	Not Found	High	High	1
High	Master Protein	4652787828938378121	308	A0A6P7SD30	tropomyosin Tod p 1.0102 OS=Octopus vulgaris OX=6645 GN=LOC115211774 PE=3 SV=1	MDVCKQKMKSLRLEAETAKEKADEFEKKLKEAEQAKFLLEQDLTSWQKKYSSLENELDNITRELERIQDIEKAKNKLDDELVWQQKKYAILEQDLDNAQNELDKVKDCYAAKEKTEEELTWLQKAHTNVEKDLDEVTSKHENTTDRLNSSEQKVSELEAEIQALHRRIQIQEMDLTRSEEMLELKSVKEETNQEKLSEAELRASTAEANVTRLEGEIDRLEAEVQAEKDKYQVLCDDLETAYAELAV	>tr|A0A6P7SD30|A0A6P7SD30_OCTVU tropomyosin Tod p 1.0102 OS=Octopus vulgaris OX=6645 GN=LOC115211774 PE=3 SV=1	0	40.613	0	38	9	13	0	9	247	28.9	4.7	41.54	38	13	9	0	0	Not Found	High	Not Found	Not Found	High	Not Found	Not Found	High	Not Found	1
High	Master Protein	-5183734858659007580	127	Q27Q56	Hemocyanin subunit 2 (Fragment) OS=Sepia officinalis OX=6610 PE=2 SV=1	WMSGRNTVYGKLIRKNVDTLSHDEILNLQIALRNMQDDEGATGYQAISAYHGEPADCKAADGSQIVCCLHGMPTFPMWHRLYMVQFEQAVAGHGSTLGIPYWDWTKPMSHLPELVQHPLFIDPNGQKAKKNVFYSGEIKFENRVTARAVDARLYEASKEGHKNFLLEGVLNALEHEDYCHFEVQLEVAHNPIHYLVGGRFTHSMSSLEYTSYDPLFFLHHSNVERQFALWQALQKHRGLSTRPNCGLNLFHIPMEPFGRDSNPFAITKDNAKPSSVFDYEHLGYEYDDLTLNGMTVEELETLLKGRKSKARAYANFRLGGIKTSANVRIKLCIPSKDKRQSDNCDNYAGEFFILGGIHEMPWDFAYPYLHEITDTVNSLGLKLDSNYYVIAEVTAINGT…	>tr|Q27Q56|Q27Q56_SEPOF Hemocyanin subunit 2 (Fragment) OS=Sepia officinalis OX=6610 PE=2 SV=1	0	40.154	0	3	10	25	0	0	3327	382.1	6.3	60.13	3	25	10	0	0	Not Found	Not Found	Not Found	Not Found	Not Found	Not Found	Not Found	Not Found	Not Found	1
High	Master Protein	1443974115365765251	254	A0A7E6F2W5	Calreticulin OS=Octopus vulgaris OX=6645 GN=LOC115215618 PE=3 SV=1	MERLTLSGGLFLVLVALSNAKVYFKEDFIDDSWRSKWVDSIYKGSDQGKFEISAGKFYGDAVKDKGLKTSQDAKFYGISANFDKFSNENEPLVLQFTVKHEQNIDCGGGYIKLYSDDIDQKNLHGDSPYLIMFGPDICGPGTKKVHVIFNYKGKNLLTKKDIRCKDDVYTHLYTLIVKPDNTYEVKIDNEKVESGDLESDWDFLPPKKIKDPSAKKPEDWDDREKMDDPDDKKPEDWDQPEHIPDPDAKKPDDWDDDMDGEWEPPMIDNPAYKGEWKPKQIDNPSYKGEWIHPEIDNPDYSPDTNLYKYTSIGAVGFDLWQVKSGTIFDNIFVGNSVADADEHAKETWAKTKDPEKKMKDQQEEEERKVREEEEKKMKDEEADKKKDDEEEDEDEDEDE…	>tr|A0A7E6F2W5|A0A7E6F2W5_OCTVU Calreticulin OS=Octopus vulgaris OX=6645 GN=LOC115215618 PE=3 SV=1	0	39.988	0	33	11	14	0	9	414	47.9	4.67	36.24	33	14	11	0	0	Not Found	High	High	Not Found	High	High	Not Found	High	High	1
High	Master Protein	5593773341959501912	322	A0A6P7TGG8	Gamma-cystathionase OS=Octopus vulgaris OX=6645 GN=LOC115223921 PE=3 SV=1	MSTNHGHEFGKSFPHFATNAIHEGQEPDQWNSRMVVPPITMSTTFKQKEPGNSYGFDYSRSGNPTRNCLEKCIASLEGAKHALCMASGLAANDLVTRLLKAGDHIVSMDDMYGGTNRYFRTMEQLGISITFVDATDINKFAAAFQENTKLVWIETPTNPLMKVVDIAAACKVTKEKSDAIVAIDNTFCSPYFQRPLDFGADIVVHSMTKYMNGHSDAVMGCIALNDDKMAARLRFLQNACGAVPSPFDCYLVNRGLKTLHVRMKEHQKNGLAVAKFLENNPRVVKILHPGLPSHPQYELAKRQMRGFSGMVSLYIKGGIEESKKFLQNLKLFTTAESLGGFESLIELPAIMTHASVPEFQRVQLGLGDNLIRLSVGIECEEDLIADIDQALKIAIPE	>tr|A0A6P7TGG8|A0A6P7TGG8_OCTVU Gamma-cystathionase OS=Octopus vulgaris OX=6645 GN=LOC115223921 PE=3 SV=1	0	38.995	0	28	9	18	0	9	397	43.9	6.98	52.52	28	18	9	0	0	High	High	High	High	High	High	High	High	High	1
High	Master Protein	2786932820702666681	278	A0A812CKE2	ACTB_G1 OS=Sepia pharaonis OX=158019 GN=SPHA_36281 PE=3 SV=1	MDDNEVAALVIDNGSGMCKAGFAGDDAPRAVFPSIVGRPRHQGVMVGMGQKDSYVGDEAQSKRGILTLKYPIEHGIVTNWDDMEKIWHHTFYNELRVAPEEHPVLLTEAPLNPKANREKMTQIMFETFNTPAMYVAIQAVLSLYASGRTTGIVLDSGDGVSHTVPIYEGYALPHAIQRLDLAGRDLTDYLMKILTERGYSFTTTAEREIVRDIKEKLCYVALDFDQEMTTSEQSSSVEKSYELPDGQVITISNERFRCPEALFQPSLLGMEACGIAETTYNSIMKCDVDIRKDLYSNTVLSGGTTMYPGIADRMQKEVSGFAPKTMKIKVIAPPERKYSVWIGGSILASLSTFQQMWISKQEYDESGPGIVHRKCF	>tr|A0A812CKE2|A0A812CKE2_SEPPH ACTB_G1 OS=Sepia pharaonis OX=158019 GN=SPHA_36281 PE=3 SV=1	0	38.125	0	31	9	15	0	2	376	41.9	5.4	33.79	31	15	9	0	0	Not Found	High	Not Found	Not Found	High	Not Found	Not Found	High	Not Found	1
High	Master Protein	-313868756268007362	229	A0A6P7T7W6	Aspartyl aminopeptidase OS=Octopus vulgaris OX=6645 GN=LOC115220844 PE=3 SV=1	MAFSRETVLSSAEEFLKFVNAGPSPYHVADALKTMLKDAGFEELKESNHWTLENSKKYFLTRNESTLIAFAVGAQYKPGNGFSLVGAHVDSPCLKVKPVSRKERQGYLTVGVQCYGGGIWASWLDRDLTIAGRVMVDNGKGLEHRLVNVKKPILRIPHLAIHLQRDVNDKLTLNKEDHLNPILATKVQAHLNEENSTKSSKSEKHHSVLMKLLSQELQVETNQIMDFELCLADTQPAVIGGICEEFIFSPRLDNLVNSFCACKALIASCQENSLAKEKNIRMIALYDNEEVGSDSAQGAASLFTELVMRRICKGTVLAFEEAIPKSYHLSADQAHAIHPNYGEKHEELHHVEMHKGYVLKINANQRYASTAITCAILRKIAAQANVPLQDFVIRNDSVC…	>tr|A0A6P7T7W6|A0A6P7T7W6_OCTVU Aspartyl aminopeptidase OS=Octopus vulgaris OX=6645 GN=LOC115220844 PE=3 SV=1	0	36.873	0	33	9	12	0	9	460	51.1	7.4	39.23	33	12	9	0	0	Not Found	High	High	Not Found	High	High	Not Found	High	High	1
High	Master Protein	20088150437107162	234	Cluster-58773.104902;orf1 len=592 frame:3 start:618 end:2393 gi	524870221 ref|XP_005091896.1| PREDICTED: xaa-Pro dipeptidase-like [Aplysia californica]	RQSSGSSASSLSLQPCAKKARQPSIGEVFVQTAGNGICQSMVGRRIVDLFADNMLPLHVVESFTFVGLIKTLTPSMMSMSLGRMILASRKRQEYLASSSFTRGIHTFSVPSELFKTNRQNLCERLRKIKQIPANSYVLLQAGESETRYCSDHEPLFRQESYFHWTFGVEEPDFFGAVHIDSGKAILFPPKLDASYSTWMGKLKGEEEFKGRYDVDEVHFSDEISDFFEKTKPSLLLTLYGLNTDSGNKSTPAAFNGINKFKVNDELLHPEISECRVFKSDYELDLLRYTNKVSSAAHREVMRQIRPGMYEYQLESIFRHFCSYYGGGRHLSYTCICGSGENAAILHYGHAGAPNSRRLNDGDACLLDMGTEYCCYASDITCSYPVNGKFTEKQKIIYEA…	>Cluster-58773.104902;orf1 len=592 frame:3 start:618 end:2393 gi|524870221|ref|XP_005091896.1| PREDICTED: xaa-Pro dipeptidase-like [Aplysia californica]	0	36.736	0	31	12	17	0	12	591	66.1	6.73	42.53	31	17	12	0	0	Not Found	High	High	Not Found	High	High	Not Found	High	High	1
High	Master Protein	1492671104507831121	256	A0A0S1U346	Triosephosphate isomerase OS=Amphioctopus fangsiao OX=515817 PE=2 SV=1	MGRKFFVGGNWKLNGNKKSIDGIIEFMNAGPLNADTEVVVGPPSCYLEYVRSKLKGNIGVAAQNCYKVPSGAFTGDISPAMIKDIGLRYVILGHSERRNVFGETDELIGEKIEHAVSEGLIVIACIGEKLEEREAGKTEEVVFSQTKTIIKHTKDWSKVVIAYEPIWAIGTGKTATPEQAQSVHASLRKFISENASKEIADNVRILYGGSVSAANCKELGQKPDIDGFLVGGASLKPDFVKIVNARA	>tr|A0A0S1U346|A0A0S1U346_AMPFA Triosephosphate isomerase OS=Amphioctopus fangsiao OX=515817 PE=2 SV=1 >tr|A0A6P7SZ67|A0A6P7SZ67_OCTVU Triosephosphate isomerase OS=Octopus vulgaris OX=6645 GN=LOC115218066 PE=3 SV=1	0	35.606	0	43	10	13	0	10	247	26.7	7.8	38.78	43	13	10	0	0	Not Found	High	High	Not Found	High	High	Not Found	High	High	1
High	Master Protein	3616494879772733647	293	A0A6P7SDN6	gelsolin-like protein 2 OS=Octopus vulgaris OX=6645 GN=LOC115211664 PE=4 SV=1	MSGLVKAKNYRWKDSNLALFGSDLERQVKKESAQTEPAWEGAGSKVGVQVWRIVKFEVTHWPEEDYGSFYNGDSYIVLNTYTVDDSEDLKYDVHFWIGKDSSQDEYGTAAYKTVELDTLLDDKAVQHREVQGRESDLFKSYFEKLIILEGGAETGFRHVQPENYRPRLLRFVGSKKNIEMMEVPKHPSCLNDCDVFILDKGDVIYQMNTPDSNKDERFKALQFLQGLKSERGSVEVETLEQADTRSSHDFYESLTDEEPTDVDAPIEEIEKTLYRYTDKEFQEVKVGEFSKADLATDDVFLVYNGKNAIVWVGETASPSEKKNGIPYAHTFLNCAGNPQCPITVTKEGLKCPDLDVALCA	>tr|A0A6P7SDN6|A0A6P7SDN6_OCTVU gelsolin-like protein 2 OS=Octopus vulgaris OX=6645 GN=LOC115211664 PE=4 SV=1	0	34.965	0	33	9	10	0	9	360	40.9	4.86	29.49	33	10	9	0	0	Not Found	High	Not Found	Not Found	High	Not Found	Not Found	High	Not Found	1
High	Master Protein	-8829651504553991279	20	A0A812CBN1	Uncharacterized protein OS=Sepia pharaonis OX=158019 GN=SPHA_33848 PE=4 SV=1	MRDVDETSLKTRKDINRLTIEEEYKLRVAMERFMADKSINGYQALAEFHGLPAKCPRPDALNRVACCAHGMATFPHWHRLVIVQFEDALAARGSPIGVPYWDWTKPLDSIPHLLADENYVDPYTKETKPNPFFRAPIDFLKANVFTARKIDERLFKKPTVGDHGYLFDGMLLAFEQHDFCDFEVQFEVTHNAIHAWVGGNEPYSMSTLHYTSFDPMFWLHHSQVDRLWAIWQALQIQRGLPYKAHCASSDVHQPLKPFAFQPPLNNDELTHSHSIPTDVYDYRTELKYTYDTLFFGGMSIRELQHHIEENEAKDRVFAGFLLMGIHTSANVDLYVVAGGNEYMAGSIAILGGSKEMSWRFDRVYKHDITSALAALGVDKFGDYTLRVDIKDVNGTALPS…	>tr|A0A812CBN1|A0A812CBN1_SEPPH Uncharacterized protein OS=Sepia pharaonis OX=158019 GN=SPHA_33848 PE=4 SV=1	0	34.324	0	3	8	26	0	1	2205	253	6.42	65.33	3	26	8	0	0	Not Found	High	High	Not Found	High	High	Not Found	High	High	1
High	Master Protein	6984633997216225925	342	A0A6P7SJH5	cytosolic non-specific dipeptidase OS=Octopus vulgaris OX=6645 GN=LOC115213824 PE=3 SV=1	MEGVFKYIDDNADRFIKRLGTAVAIPSVSGSVKLRPEVRRMVEWTKAEMEKLNIQTELLELGDHVHPSSEVLKLPPVIFGQLGNDPKKKTLVVYGHLDVQPANKSDGWDTEPFVLTEIDGKLYGRGSTDDKGPVLGWLNTIEAFQNQKIDIPVNLKFVFEGMEESDSVGLADLLMSKKDSFLKDIDYVCISDNYWLGKNKPCLTYGLRGICYFFVEVECSSKDLHSGVFGGSVHEAMSDLIFLMNSLVDLNGRIQIPGIYDSVKSITSEENSLYGSIDFDLEDYRKDIGCEKLMHSSKDEILKHRWRHPSLSLHGIEGAFSEPGAKTVIPRKVTGKFSIRIVPNQTPDEVTKLAKSYLENCHKTRGSPNKLNVTGSGGPAWLSDFNHENYNAAKKACQK…	>tr|A0A6P7SJH5|A0A6P7SJH5_OCTVU cytosolic non-specific dipeptidase OS=Octopus vulgaris OX=6645 GN=LOC115213824 PE=3 SV=1	0	32.919	0	35	11	17	0	10	469	52.2	5.96	43.69	35	17	11	0	0	Not Found	High	High	Not Found	High	High	Not Found	High	High	1
High	Master Protein	224427513110246699	240	Cluster-58773.126821;orf1 len=158 frame:3 start:462 end:935 gi	677969078 ref|XP_009070303.1| PREDICTED: fatty acid-binding protein, liver [Acanthisitta chloris]>gi|677295301|gb|KFP77729.1| Fatty acid-binding protein, liver [Acanthisitta chloris]	STAWHRKRSKFLISISNTLQAKMDNFVGKWEQSDAEPTNFDAFLDATGLPEEARAKLKAARITVEYVKDGDSWKIITTSGSHSKTSVLQIGVPYQSTDLLGRKFTNVVTMDGPNKMKQTCTEWAESTIETESVLSGDTITLTCTTKGVSTTSVFKRA	>Cluster-58773.126821;orf1 len=158 frame:3 start:462 end:935 gi|677969078|ref|XP_009070303.1| PREDICTED: fatty acid-binding protein, liver [Acanthisitta chloris]>gi|677295301|gb|KFP77729.1| Fatty acid-binding protein, liver [Acanthisitta chloris]	0	31.527	0	34	6	15	1	6	157	17.3	8.41	42.81	34	15	6	0	0	Not Found	High	High	Not Found	High	High	Not Found	High	High	1
High	Master Protein	-6729399318946355906	81	Cluster-58773.194608;orf1 len=190 frame:3 start:591 end:1160 gi	220683564 gb|ACL80558.1| sodium-calcium exchanger [Doryteuthis pealeii]	YIYKRLSRVAQLSPCIPDENYLPPASLSLSLWVFLSLHLHPSSPSVFFRSAAASEETMASGLAGKWILESSEKFDEYMTVLGVNIITRTMAKAAVPTQEIKVNGDEWYIKTSTTFKTTEITFKIGEEFEETTADGRKVKTTCTIDGNTLIQDQKGTFDSVLKRELKDGKMVMVLTVQDVVCTRVYKPTE	>Cluster-58773.194608;orf1 len=190 frame:3 start:591 end:1160 gi|220683564|gb|ACL80558.1| sodium-calcium exchanger [Doryteuthis pealeii]	0	31.206	0	45	9	15	0	9	189	21.2	6.04	41.15	45	15	9	0	0	Not Found	High	High	Not Found	High	High	Not Found	High	High	1
High	Master Protein	3199919372762332312	285	A0A6P7TGA0	Isocitrate dehydrogenase [NADP] OS=Octopus vulgaris OX=6645 GN=LOC115223822 PE=3 SV=1	MAKVVASVASKLLVRNTSSSLHNLVAPATLNVQQKRNYAKKRIEVANPVVELDGDEMTRIIWDKIKERLIFPYVKVDCKYFDLGLPHRDATDDQVTIDSAHAILKYNVGIKCATITPDEARVEEFSLKKMWLSPNGTIRNILGGTVFREPILCKTIPRLVPGWTQAITIGRHAHGDQYKATDLVVPGPGKLEMVFTPENGQEQRMTIFNFKAGGVGMGMYNTDQSIRDFAHASFQYALMKKWPLYMSTKNTILKRYDGRFKDIFEEIYQAEYAKKFDDLGIWYEHRLIDDMVAQALKSSGGFVWSCKNYDGDVQSDIVAQGYGSLGLMTSVLVCPDGKTIEAEAAHGTVTRHYREHQKGNPTSTNPIASIFAWTRGLEHRGKLDDNQDLIRFANVLEAA…	>tr|A0A6P7TGA0|A0A6P7TGA0_OCTVU Isocitrate dehydrogenase [NADP] OS=Octopus vulgaris OX=6645 GN=LOC115223822 PE=3 SV=1	0	30.994	0	18	8	10	0	8	446	50	7.56	29.13	18	10	8	0	0	Not Found	High	Not Found	Not Found	High	Not Found	Not Found	High	Not Found	1
High	Master Protein	-5265191007574304739	122	Cluster-58773.122645;orf1 len=203 frame:1 start:178 end:786 gi	481054003 gb|AGJ98458.1| glutathione-S-transferase [Sepiella maindroni]	TMTKYELKYFNVRGRGEIIRITLAAAEQKFKDTRYEFQDWPSHKQDTPGKALPVLIVDDKTVLTQSIAIARYLSKKHNLYGKDDCECYKIDEIIDCFLDIFNALVKIKFAPENMKEDLKVKYKETYVRIFDYLEGNLKTGQTHFVGQRLTLADISSFAFLEFCITLDANVLKTYPKIDAIRETVSKVPSIAEYLEKRPKTDF	>Cluster-58773.122645;orf1 len=203 frame:1 start:178 end:786 gi|481054003|gb|AGJ98458.1| glutathione-S-transferase [Sepiella maindroni]	0	30.16	0	40	9	16	0	9	202	23.5	8.09	42.03	40	16	9	0	0	Not Found	High	High	Not Found	High	High	Not Found	High	High	1
High	Master Protein	2818278066129980474	280	A0A077B6R8	Hemocyanin subunit 1 OS=Euprymna scolopes OX=6613 GN=HCY1 PE=2 SV=1	MRRLNHLPLLCLAVILTLWMSGSNTVNGNLVRKNVDTLSHEEIISLQVALRSMQDDDGATGYQAISAYHGEPADCKAADGSSIVCCLHGMPTFPLWHRLYIVQFEQALAAHGSALGVPYWDWTKPMDHLPELVQHPLFIDPNGQKAKKNVFYSGEIKFENKVTARAVDARLYEASQKGAKNFLLEGVLNALEQEDYCHFEVQFEVAHNPIHYLVGGRFTHSMSSLEYTSYDPLFFLHHSNVERQFALWQALQKHRGLPTRPNCGLNLFHNPMEPFGRDTNPFAITKDNAKPSSLFEYEHLGYAYDDLTLNGMSVEELDSFLKSRKNQARAFANFRLGGIKTSANVRINICIPNKDGRHSDNCDNYAGGFFILGGVHEMPWNFAYPYLHEITDKVISLGL…	>tr|A0A077B6R8|A0A077B6R8_EUPSC Hemocyanin subunit 1 OS=Euprymna scolopes OX=6613 GN=HCY1 PE=2 SV=1	0	30.041	0	3	8	22	1	1	3342	381.7	6.05	52.59	3	22	8	0	0	Not Found	Not Found	High	Not Found	Not Found	High	Not Found	Not Found	High	1
High	Master Protein	-8564843066900421574	33	A0A6P7T8U5	uncharacterized protein LOC115221216 OS=Octopus vulgaris OX=6645 GN=LOC115221216 PE=4 SV=1	MTLRYGKTTSSFKSFICSALGSNYYKYNRFGRQGTVVIKITSRASRMKFFLAILLVACAQAFSIKNMIEREAFDLLVSQATSELETMAVKEVESALTAEGLHVTPFERSVIHKVSTMVGETIKSEMTKIVSEVTTTGDFKMAVAQRIIEKLRDAAEMMADGLHMDSETTEAFFHELMKDIEALEKSSLFEEGIEKMFDNLFEKIMKAVTYDAHQKRDLIDIFEKINDTLRRIVGHLHGKFHDLHDFLHQAISHGKDKLKPHIENIKTLAKTFIDHINLVSAKVAQQALEFFKPWASKLGQTWTTLVKDIHERLQKLHATAIPIY	>tr|A0A6P7T8U5|A0A6P7T8U5_OCTVU uncharacterized protein LOC115221216 OS=Octopus vulgaris OX=6645 GN=LOC115221216 PE=4 SV=1	0	30.031	0	24	6	11	3	3	324	36.9	8.05	34.89	24	11	6	0	0	Not Found	High	High	Not Found	High	High	Not Found	High	High	1
High	Master Protein	5583419788257168207	321	A0A6P7T066	Glyceraldehyde-3-phosphate dehydrogenase OS=Octopus vulgaris OX=6645 GN=LOC115217845 PE=3 SV=1	MGQHNIGINGFGRIGRLVLRCALLKGVKVVAINDPFIDLDYMVYMFKYDSTHGKYHGDVKAENGKLVIDGNVITVFNERDPANIQWGSAGAEYIVESTGVFTSTEKASAHFKGGAKKVVISAPSPDAPMFVVGVNHEKYTADLKVVSNASCTTNCLAPLAKVMNDKFGIVEGLMTTIHAFTATQKVVDGPSSKDWRGGRTAGTNIIPSSTGAAKAVGKVIPELNGKLTGMAFRVPVPDVSVVDLTCRLAKETTYDEIKKAIKHASENEMKGIFGYTEDAVVSTDFLSDQRSSIFDASAGIQLSPTFVKLVTWYDNEFGYSCRVIDLLNHMQKVDG	>tr|A0A6P7T066|A0A6P7T066_OCTVU Glyceraldehyde-3-phosphate dehydrogenase OS=Octopus vulgaris OX=6645 GN=LOC115217845 PE=3 SV=1	0	29.905	0	18	5	14	1	1	335	36.2	7.49	34.44	18	14	5	0	0	Not Found	High	Not Found	Not Found	High	Not Found	Not Found	High	Not Found	1
High	Master Protein	-2259958790262016667	189	Cluster-58773.160890;orf1 len=401 frame:2 start:1043 end:2245 gi	300518909 gb|ADK25704.1| glyceraldehyde-3-phosphate dehydrogenase [Cancer borealis]	ANLAESFPVATMAALDPALLQTIKTVVSEEVNRAVEPLRQELNRLRSKVSGQKPASEIVPVSVNKMGQHNIGINGFGRIGRLVLRCALLKGVKVVAVNDPFIDLDYMVYMFKYDSTHGRYHGDVKAENGKLVIDGHIITVFNERDPANIQWGSAGAEYIVESTGVFTSTEKASAHFKGGAKKVVISAPSPDAPMFVVGVNHEKYTADLKVVSNASCTTNCLAPLAKVMNDKFGIVEGLMTTIHAFTATQKVVDGPSSKDWRGGRTAGTNIIPSSTGAAKAVGKVIPELNGKLTGMAFRVPVPDVSVVDLTCRLAKETTYDEIKKAIKHASENEMKGIFGYTEDAVVSTDFVSDQRSSIFDASAGIQLSPTFVKLVTWYDNEFGYSCRVIDLLNHMQKVDG	>Cluster-58773.160890;orf1 len=401 frame:2 start:1043 end:2245 gi|300518909|gb|ADK25704.1| glyceraldehyde-3-phosphate dehydrogenase [Cancer borealis] >Cluster-58773.160894;orf1 len=401 frame:3 start:45 end:1247 gi|300518909|gb|ADK25704.1| glyceraldehyde-3-phosphate dehydrogenase [Cancer borealis]	0	29.819	0	20	6	13	0	2	400	43.2	7.8	30.98	20	13	6	0	0	Not Found	High	Not Found	Not Found	High	Not Found	Not Found	High	Not Found	1
High	Master Protein	-1816185992342785697	204	A0A2I7NB22	Superoxide dismutase [Cu-Zn] OS=Octopus vulgaris OX=6645 PE=2 SV=1	MQAVCVLGSSESVSGKIYFKQECSNGPVKVTGEIAGMLDGKHGFHIHEFGDNTNGCVSAGGHFNPESKEHGAPADKIRHVGDLGNVESGQGVAKVNIEDSVISLNGPNSIVGRTLVVHEDIDDLGVGGHKDSKTTGNAGKRLACGVIGIAKLEK	>tr|A0A2I7NB22|A0A2I7NB22_OCTVU Superoxide dismutase [Cu-Zn] OS=Octopus vulgaris OX=6645 PE=2 SV=1	0	28.824	0	36	3	6	0	3	154	15.9	6.52	19.32	36	6	3	0	0	Not Found	High	Not Found	Not Found	High	Not Found	Not Found	High	Not Found	1
High	Master Protein	4311657664918227116	300	W6CNR9	Hemocyanin subunit 3 OS=Sepia officinalis OX=6610 PE=2 SV=1	MGGSNRTSFLFLAFVATSWFVYAVTASKFVRKNVDQLTSDEILELQVALRSMQDDDGPTGYQAISAYHGEPADCKAADGSTIVCCLHGMPSFPMWHRLYIVQFEQAMASHGSKLGIPYWDWTKPMTHLPELVQHPLFIDPSGKKAKKNVFYSGEIKFEHKVTARAVDARLYDASKKGHENFLLEGVLNALEHEDFCRFEVQFEVAHNPIHYLVGGRITHSMSSLEYTSYDPIFFLHHSNVERQFALWQALQKHRGLSTKANCGLNLFHEPMEPFGRETNPIALTKDNAKPSSVFEYDQLGYEYDDLTLNGMSLEELNNLLKQRKSKARAFANFRLGGIKTSANVRISICIPNKDGRHSDNCDNYAGEFFILGGKHEMPWHFAYPYLYEITDKVHALGLS…	>tr|W6CNR9|W6CNR9_SEPOF Hemocyanin subunit 3 OS=Sepia officinalis OX=6610 PE=2 SV=1	0	28.782	0	3	8	16	0	1	3338	383.3	6.4	37.71	3	16	8	0	0	Not Found	Not Found	High	Not Found	Not Found	High	Not Found	Not Found	High	1
High	Master Protein	8559791398557446564	365	Cluster-58773.135700;orf1 len=265 frame:3 start:75 end:869 gi	283837550 dbj|BAI66447.1| serine protease 1 [Heterololigo bleekeri]	SKMLLILCLAALAYGMPLEEPIEYGIDEDLFINSSYIVAGQKANNCEFPSIVSLQIQKNGKTFLCGGSIMDANHVITAAHCVASGVTRIIVFYGATSAAQAKVTYATKINAHLGFYTTSRALHNDVAILKLGKPILMSTCVKAIPLASPHTDFAGKTCITAGWGKTTWTSQPTTYLRKVSLPIMSYKECHAQWNYIGHEHICAGDWIPGGASPCQGDSGGPLYCMSNGHYVLAGLVSFGLKCEYGPAMYTSVSYFRTWINANTV	>Cluster-58773.135700;orf1 len=265 frame:3 start:75 end:869 gi|283837550|dbj|BAI66447.1| serine protease 1 [Heterololigo bleekeri]	0	28.688	0	42	8	12	0	3	264	28.4	7.97	33.75	42	12	8	0	0	Not Found	High	High	Not Found	High	High	Not Found	High	High	1
High	Master Protein	3497067114482976313	292	Cluster-58773.162111;orf1 len=288 frame:1 start:1 end:864 gi	675369805 gb|KFM62707.1| Laminin subunit alpha-2, partial [Stegodyphus mimosarum]	IKITSRASRMKFFLAILLVACAQAFSIKNMIEREAFDLLVSQATSELETMAVKEVESALTAEGLHVTPFERSVIHKVSTMVGETIKSEMTKIVSEVTTTGDFKMAVAQRIIEKLRDAAEMMADGLHMDSETTEAFFHELMKDIEALEKSSLFEEGIEKMFDNLFEKIMKAVTYDAHQKRDLIDIFEKINDTLRRIVGHLHGKFHDLHDFLHQAISHGKEQLKPHIENIKTLAKTFIAHINDVNARVAQQALEFFKPWAALLGSTWTTLVNDIHKRLEQLKPTSAPIF	>Cluster-58773.162111;orf1 len=288 frame:1 start:1 end:864 gi|675369805|gb|KFM62707.1| Laminin subunit alpha-2, partial [Stegodyphus mimosarum]	0	28.068	0	22	5	9	0	2	287	32.6	6.54	29.13	22	9	5	0	0	Not Found	High	High	Not Found	High	High	Not Found	High	High	1
High	Master Protein	6768022483343087705	341	A0A6P7TYN8	Protein disulfide-isomerase OS=Octopus vulgaris OX=6645 GN=LOC115231769 PE=3 SV=1	MLLQTYIQVFSFYTPSYLLTASGGVMKSSLIVFVALFCFSQALEGVKEEEGVLVLTKDNFEQLTQKIKYLMVEFYAPWCGHCKALAPEYVKAAGEFKDDENCYLGKVDATIEVDLAEKYEVRGYPTIKFFKEGKIYDYSEGRTAGDMVAWIKKKTGPPAVTLNSVSEAKALVNKEAVVVVGFFQDVESADAKAFTEAAASIDDVSFAITSNADIFKEHGLEKDAIILFKKFDDGEVRFDGKLTAKDIETFVVANKLPLVIEFNQESAQKIFSGDIKNHLLLFLKKSTKPETLLDSFKTVAKEFKGKVLFINIDIEDEDNMRILEFFGLKEEECPSIRLIRLDDEMSKYKPQTTDLTTESMTKFVQDFLDGKIKQHMMSADLPEEWDAKPVKILVGTNFN…	>tr|A0A6P7TYN8|A0A6P7TYN8_OCTVU Protein disulfide-isomerase OS=Octopus vulgaris OX=6645 GN=LOC115231769 PE=3 SV=1	0	27.716	0	21	8	9	1	8	521	58.9	4.83	28	21	9	8	0	0	Not Found	High	High	Not Found	High	High	Not Found	High	High	1
High	Master Protein	-7153231228329090617	74	A0A812CD65	Uncharacterized protein OS=Sepia pharaonis OX=158019 GN=SPHA_33819 PE=4 SV=1	MRSYEGYRLYFLIILITVLWIVPENRIYGKFVRKNVDHLTSDEILELQVALRSMQDDDGPTGYQAISAYHGEPADCKAADGSTIVCCLHGMPSFPMWHRLYIVQFEQAMASHGSKLGVPYWDWTKPMTHLPELVQHPLFIDPSGKKAKKNVFYSGEIKFEHKITARAVDDRLYDASKKGHENFLLEGVLNALEHEDFCHFEVQFEVAHNPIHYLVGGRITHSMSSLEYTSYDPIFFLHHSNVERQFALWQALQKHRGLPTRANCGLNLFHEPMEPFGRETNPIALTKDNAKPSSVFEYDQLGYEYDDLTLNGMSIEELDNLLKARQTRPRVYANFRLGGIQTSANIKIMLCIPSKDKRHSDNCDNEAGQFFILGGIHEMPWNFAYPYLHEITNIVNAVG…	>tr|A0A812CD65|A0A812CD65_SEPPH Uncharacterized protein OS=Sepia pharaonis OX=158019 GN=SPHA_33819 PE=4 SV=1	0	27.523	0	2	7	21	0	1	2934	338.4	6.51	52.04	2	21	7	0	0	Not Found	Not Found	High	Not Found	Not Found	High	Not Found	Not Found	High	1
High	Master Protein	6744707011846815826	340	A0A6P7S9Z4	Calmodulin OS=Octopus vulgaris OX=6645 GN=LOC115210643 PE=3 SV=1	MADQLTEEQIAEFKEAFSLFDKDGDGTITTKELGTVMRSLGQNPTEAELQDMINEVDADGNGTIDFPEFLTMMARKMKDTDSEEEIREAFRVFDKDGNGFISAAELRHVMTNLGEKLTDEEVDEMIREADIDGDGQVNYEEFVTMMTSK	>tr|A0A6P7S9Z4|A0A6P7S9Z4_OCTVU Calmodulin OS=Octopus vulgaris OX=6645 GN=LOC115210643 PE=3 SV=1 >tr|A0A0L8I9I4|A0A0L8I9I4_OCTBM Calmodulin OS=Octopus bimaculoides OX=37653 GN=OCBIM_22028792mg PE=3 SV=1	0	27.125	0	48	5	13	1	5	149	16.8	4.22	40.28	48	13	5	0	0	High	High	High	High	High	High	High	High	High	1
High	Master Protein	-2323676845952470501	188	A0A6P7SIX4	Inorganic diphosphatase OS=Octopus vulgaris OX=6645 GN=LOC115213471 PE=3 SV=2	MQHFHPSFTGSRLCFLPGVFRFSGRFAKTPTSAIVNRCQSININTLARWRVLKAVEQKSAGVGVHKRRASCYNNNLSNGGGSGGRSFCNVDSSSIDIRRRIHSGSSICHWWCTPNRLLAPLLVAGNIATRSSPACVISNYRLTSLSPLLQLLHQLHSLSLFSCGVQQRLFSLQTATMSTYKITEKGTPNTKDYKIYYSGPNGIISPFHDIPLYSNTSKTEFNMVVEIPRWTNHKMEICKEDMMNPIKQDVKNGKVRFVKNLFPHHGYIWNYGALPQTWEDPNFVTPDTNTKGDSDPIDVCEIGSKIHKRGAVIQVKVLGVMCLIDEGETDWKVLAIDVTDPLASDLNDVDDIEKSMPGFLKATYEWFRYYKVPDGKQENQFAFNGEAKNKAYALKIVTE…	>tr|A0A6P7SIX4|A0A6P7SIX4_OCTVU Inorganic diphosphatase OS=Octopus vulgaris OX=6645 GN=LOC115213471 PE=3 SV=2	0	26.948	0	24	7	12	0	7	464	52.1	8.29	29.59	24	12	7	0	0	Not Found	High	High	Not Found	High	High	Not Found	High	High	1
High	Master Protein	-4276934162530884536	151	Cluster-58773.127031;orf1 len=154 frame:-3 start:549 end:88 gi	405978782 gb|EKC43144.1| Nucleoside diphosphate kinase B [Crassostrea gigas]	RTTVMERTFIAVKPEGVQRGLCGEVMTRFEKRGFQLVACKLVHASKTLLESHYAEHKGKGFFDGLVAHMSSSPVLAMVWEGASVISTARTMMGATDPKKSAPGTIRGDYGIDMGRNIIHGSDGTESATREINLWFTKEEQITWKPALSSWLYE	>Cluster-58773.127031;orf1 len=154 frame:-3 start:549 end:88 gi|405978782|gb|EKC43144.1| Nucleoside diphosphate kinase B [Crassostrea gigas]	0	25.503	0	35	5	11	0	5	153	16.9	8.46	29.52	35	11	5	0	0	Not Found	High	High	Not Found	High	High	Not Found	High	High	1
High	Master Protein	-2530698179792347649	182	A0A6P7SRB2	acidic mammalian chitinase isoform X1 OS=Octopus vulgaris OX=6645 GN=LOC115215700 PE=3 SV=1	MRARIKKSESLINEPQSVASHPDLVSDTKSQTESLLLRGRTQNLHNDSYISSNIMMLLQVLGSLLLSLLALYVVEANQSFRRVCYYTNWSQYREVPAKFLPENIDPQLCTHIIYAFATLEGNYLKPFEWNDDSTPWMVGMYAKVVAMKQKNPKLVVLLSVGGWNMGSALFTQMASTPENRKQFYTNATDFLRTRGFDGLDMDWEYPGSRGSPPEDKEKFTSLMQETSGYFTTEARDSNKTRLYLTASVPAGKKTIDPGFNIQALSSVVDFFNLMSYDYHGGSFDKVLGHNCPLYSLSTEEGLAKTFNMNWSANYWVANGLPKEKLNIGMPVYGRGFKLTNKTCITPGCPSSGPNAAGRYTRLEGFLSYYEICQLIKSGAQTYWIDEQQVPYLVKDDQWI…	>tr|A0A6P7SRB2|A0A6P7SRB2_OCTVU acidic mammalian chitinase isoform X1 OS=Octopus vulgaris OX=6645 GN=LOC115215700 PE=3 SV=1	0	25.294	0	26	9	9	0	9	452	51	6.55	23.35	26	9	9	0	0	Not Found	High	High	Not Found	High	High	Not Found	High	High	1
High	Master Protein	3946225180698112480	297	A0A6P7TMW4	heat shock protein HSP 90-alpha isoform X2 OS=Octopus vulgaris OX=6645 GN=LOC115224220 PE=3 SV=1	MSTETADGEVFAFQAEIAQLMSLIINTFYSNKEIFLRELISNSSDALDKIRYESLTDPSKLDSGKELYIKIIPNKEDNTLTIIDTGIGMTKADMVNNLGTIAKSGTKAFMEALQSGADISMIGQFGVGFYSAYLVADKVIVESKHNDDDQHTWESSAGGTFTIKTSTSEKLGRGTKITLYLKEDQAEYLEEKRIKEVVKKHSQFIGYPIKLVVEKERSKEVSDDEEEEEKKEDKEEEGEDKIKIEDVEDEETSKGKKKKSIKEKYFEDEELNKTKPIWSRNPDDIKNEEYGEFYKSLTNDWEEHLAVKHFSVEGQLEFRALLFVPKRAPFDMFENKKKKNNIKLYVRRVFIMDNCEDLIPEYLNFIKGVVDSEDLPLNISRETLQQSKILKVIRKHLVK…	>tr|A0A6P7TMW4|A0A6P7TMW4_OCTVU heat shock protein HSP 90-alpha isoform X2 OS=Octopus vulgaris OX=6645 GN=LOC115224220 PE=3 SV=1	0	25.273	0	14	10	10	0	10	713	81.8	5.19	23.9	14	10	10	0	0	Not Found	High	Not Found	Not Found	High	Not Found	Not Found	High	Not Found	1
High	Master Protein	1183445136473830473	250	Cluster-58773.162759;orf1 len=276 frame:2 start:2 end:829 gi	524875728 ref|XP_005094588.1| PREDICTED: uncharacterized protein LOC101847027 isoform X1 [Aplysia californica]>gi|524875730|ref|XP_005094589.1| PREDICTED: uncharacterized protein LOC101847027 isoform X1 [Aplysia californica]	NDRLLKSYPAPWTFSTNLAVFLKRKSNENHGGLHVNSLRTDRFNLHSTMSKNVTIPSENKQGDCPGVLSGDPAKTKRGLIVLQEWWGMNQQIQDEAADLASRGPFVTLVPDLYRGKLATDNEEAGHLMNNLDWEGAIQDIQGCAKYLLNLGCKKIGVTGFCMGGALAFASAVRVPEINASAPFYGIPGEAIADVTKIKIPLQCHFGKNDNVVGFSSPVEQEAVRKKLDNAKVKHEFHVYDAGHAFTNTTSPGFHKESCDLALGRLIKFMNENLQA	>Cluster-58773.162759;orf1 len=276 frame:2 start:2 end:829 gi|524875728|ref|XP_005094588.1| PREDICTED: uncharacterized protein LOC101847027 isoform X1 [Aplysia californica]>gi|524875730|ref|XP_005094589.1| PREDICTED: uncharacterized protein LOC101847027 isoform X1 [Aplysia californica]	0	25.124	0	37	8	12	0	8	275	30.1	7.77	32.14	37	12	8	0	0	Not Found	High	High	Not Found	High	High	Not Found	High	High	1
High	Master Protein	2152409194182745276	270	A0A6P7T5D5	Aspartate aminotransferase OS=Octopus vulgaris OX=6645 GN=LOC115219838 PE=3 SV=1	MSSKYADVPIADPVEVFAVSAAYRADPDPNKVNLSVGAYRTNEGKPWVLPVVHKVELQIASDPTLNHEYLPILGFPDFRSSAIRLLLGEGNPAIVENRVVGVQSLGGTGAIRLSADFYRTINKADTVYVSSPTWGNHKGVYMAAGFTNVKEYRYWDAQTRSLDINGMVEDLSAAKENSVVILHAVAHNPTGVDPTHDQWKQIADVCEERKVLVLMDIAYQGFATGDLVADAWAPRYFASRGFEFLTAQSFSKNFGLYNERIGNLVLVCNTTNAMERCSSQLEIIVRRIWSNPPNHGARVVATVLNNPSYYNEWQESVKVMANRIKEMRKQLYEKLKSLETPGTWEHIITQIGMFSFTGLNPTQVDKMVKKFHIYLIKQGRINMCGLNSSNLDYVASAIY…	>tr|A0A6P7T5D5|A0A6P7T5D5_OCTVU Aspartate aminotransferase OS=Octopus vulgaris OX=6645 GN=LOC115219838 PE=3 SV=1	0	23.948	0	20	8	9	0	8	404	45.1	7.24	21.54	20	9	8	0	0	Not Found	High	High	Not Found	High	High	Not Found	High	High	1
High	Master Protein	-6680458374186727004	85	A0A7E6F5B1	collagen alpha-1(XII) chain-like OS=Octopus vulgaris OX=6645 GN=LOC118765117 PE=4 SV=1	MAPFLLFAVSLTILQLGNALPLMKELSECDNPADIVFLLDCSTSMYPAQFKQQLAFVNNFTEGMDIDNGTIRIAVVTFSTTVQTEFNLNAYKTKAEMQKAISDILYLGGRTHTWLALDHIRQEIFTTDNGGRIGVPKIVIMITDGGSNEKKKTIEAAKILHKDPLRVFTIGIGPSVDTDELKAIASKPTNIFHIDNFDALKALTSEIIKNVCIKVCGVHPSDIIFLLDESTSIYDDDFGIQLSFLISFIRDSVIGINATQIGVVTFSSNVIYRIKLNQFSKSKDLENAVLSINRNHGDTNTGDALKLIREEGFTKANGGRDGVPHILIVITDGQAQSPEKTARESAAIHKTDIAIFTIGIGPAVKPSELRMIAGADDKVFRTASYSTLKTIEKALFTKV…	>tr|A0A7E6F5B1|A0A7E6F5B1_OCTVU collagen alpha-1(XII) chain-like OS=Octopus vulgaris OX=6645 GN=LOC118765117 PE=4 SV=1	0	23.773	0	19	7	8	0	7	408	44.7	6.38	22.34	19	8	7	0	0	Not Found	High	Not Found	Not Found	High	Not Found	Not Found	High	Not Found	1
High	Master Protein	3403375844970628054	290	A0A0L8GJH5	Pyruvate kinase OS=Octopus bimaculoides OX=37653 GN=OCBIM_22032473mg PE=3 SV=1	MAQLLAQPGAGELQRIHSSPFGLPGSGSQTNVGLSQQLQAACARSQLEHMVALDIDSEPCHVRMSGIVCTIGPACKDVDSLKKMMIEGMDVARLNFSHGSYEYHGETIKNVREATQKFDKPKIIAIALDTKGPEIRTGLLKGGPSAEVSLKTGAKIRITTKESVMESCDENTLYVDYKNITKVMKKGSRMFIDDGLISVVVKEMGSDYMDCEIENGGDLGSKKGCNLPGIPVDLPAVSEKDKQDLIFGVEQDVDMVFASFIRSAEGVREIRKVLGEKGKDIKIFVKIENHQGVKNFDEILKETDGVMVARGDLGIEIPPEKVFLAQKMMIAKCNKAGKPVICATQMLESMVKKPRPTRAEAGDVANAVLDGADCVMLSGETAKGSYPLDAVRMMAKIAR…	>tr|A0A0L8GJH5|A0A0L8GJH5_OCTBM Pyruvate kinase OS=Octopus bimaculoides OX=37653 GN=OCBIM_22032473mg PE=3 SV=1	0	23.683	0	13	7	8	0	7	560	61.1	7.47	23.9	13	8	7	0	0	Not Found	High	Not Found	Not Found	High	Not Found	Not Found	High	Not Found	1
High	Master Protein	-2434448353987139541	184	A0A7E6EUU7	uncharacterized protein LOC118763595 OS=Octopus vulgaris OX=6645 GN=LOC118763595 PE=4 SV=1	MESLIDKVDASKWEEIDASKVDGLVDYHIMRNFKNLDDHTIEFLIQANDDSDTVKATCTHLLKGKNPMQGIGSCEMKVVNDAILAINLNGDCIVLK	>tr|A0A7E6EUU7|A0A7E6EUU7_OCTVU uncharacterized protein LOC118763595 OS=Octopus vulgaris OX=6645 GN=LOC118763595 PE=4 SV=1	0	23.325	0	54	5	6	1	5	96	10.7	4.91	21.22	54	6	5	0	0	Not Found	High	Not Found	Not Found	High	Not Found	Not Found	High	Not Found	1
High	Master Protein	4265368770160023084	299	A0A6P7SUK9	Adenosylhomocysteinase OS=Octopus vulgaris OX=6645 GN=LOC115216611 PE=3 SV=1	MASKPPYKVADIKLAESGRLAITLAEKEMPGLMEMRKRYGSNKILKGARIAGCLHMTVQTAVLIETLTELGAEVQWSSCNIFSTQDNAAAAIAKTGVPVYAWKGETDEEYIWCIEQTLYFKDGQPLNLILDDGGDLTNLIHTKYPQLLEGIKGLSEETTTGVHNLYKMLERKQLKVPAINVNDSVTKSKFDNLYGCRESLVDGIKRATDIMLAGKVAVVAGYGDVGKGCAQSLRGFGTRVIVTEIDPINALQAAMEGYEVTTMDEACKIGRIFVTTTGCRDIITPKHLMEMPDDAIVCNIGHFDVEIDVDWLNKNAVEKVVIQPQVDRYTLKNGRHVIILAEGRLVNLGCAHGHPSFVMSNSFTNQTLAQIELWTKKYSIGVHFLPKKLDEEVASLHLG…	>tr|A0A6P7SUK9|A0A6P7SUK9_OCTVU Adenosylhomocysteinase OS=Octopus vulgaris OX=6645 GN=LOC115216611 PE=3 SV=1	0	23.244	0	23	8	9	0	8	431	47.6	6.65	25.93	23	9	8	0	0	Not Found	High	High	Not Found	High	High	Not Found	High	High	1
High	Master Protein	-8756454344469068898	23	G0Y7C4	Arginine kinase OS=Sepiella maindroni OX=153280 GN=AK PE=2 SV=1	MSDADELFKALQDAKDCKSLLKKHLTQDRFDKLKGLKSKFGGTLADCIRSGCKNPDSGVGIYACDPDAYTTFAEVLDAVIMDYHKIDKVAHPQPSFGDVNNLGFGDLDPSGDLIVSTRVRVGRSHASYGFPPVLTKEDRINMEKVSVEALQSLEGELSGQYFPLEGMTPETQQKLTADHFLFNDSDRFLKAASGYDDWPTGRGIYFNQDKTFLCWVNEEDHLRLISMQKGGNLGEVYKRLVKAIEQMEKKLTFAKKDNMGYLTFCPSNLGTTMRASVHIKIPKVSQMPDFKEVCDKYNLQARGIHGEHTESVGGVYDISNKRRMGLTEFEAVTEMMRGVNEIIRLEKSA	>tr|G0Y7C4|G0Y7C4_9MOLL Arginine kinase OS=Sepiella maindroni OX=153280 GN=AK PE=2 SV=1	0	23.056	0	12	4	6	0	1	349	39.1	6.47	27.6	12	6	4	0	0	Not Found	High	Not Found	Not Found	High	Not Found	Not Found	High	Not Found	1
High	Master Protein	4378007046909877364	302	A0A6P7SQQ6	cathepsin L1 OS=Octopus vulgaris OX=6645 GN=LOC115215566 PE=3 SV=1	MKTAIIFLACAAFAVAAPFLDNSLDETWKQYKSLYGKSYEDVHSEVIRRVIWERNLQHVKQHNLKADMGIHTYWLGINEYADMTNSEFVQMMNGLKPRNASVYTPNMVYSDAESEDLPDTVDWRGKGYVTEVKNQAQCGSCWAFSTTGSLEGQTFKKTGKLVSLSEQNLVDCSASYGNNGCEGGLMDNAFQYIKKFGIDSESSYPYEGQDDDCRYKKSDVVATDTGYVDVKSMSEDSLKSAVAKVGPISVAIDAGHQSFQLYKHGVYTEESCSPTALDHGVLAVGYGTDNGQDYWLVKNSWGGSWGMKGYIKMARNKNNMCGIATQASYPLV	>tr|A0A6P7SQQ6|A0A6P7SQQ6_OCTVU cathepsin L1 OS=Octopus vulgaris OX=6645 GN=LOC115215566 PE=3 SV=1	0	22.481	0	11	5	8	0	5	332	36.8	5.54	21.83	11	8	5	0	0	Not Found	High	High	Not Found	High	High	Not Found	High	High	1
High	Master Protein	-1313183384426381204	215	A0A6P7TKE4	probable aminopeptidase NPEPL1 isoform X1 OS=Octopus vulgaris OX=6645 GN=LOC115223934 PE=3 SV=1	MSENVKFMSGLSFIMDAFDVIKGRKRKELTMTRSLKFSAKLSASDPQTTPVRIIGQIRNLNKIVYDDVKMKLEPVVTAEMYSTALASLRPSPTDSCPLWLNMASIAALPTQCSRHNTPSRAHALTKLVKSSLTGRKEFIVMVCERRDVLASACAIARALPEYSCKASCTNSVSQSVTVEFILVGNECETPLAASDLDCLQTVTSGIRLAARLVDAPCSEMHTDAFVDEISKIGAELNITPLIIRGNELAEKGFGGVYNVGKAASHPPALVVLSHKPEKATYNICWVGKGIVYDTGGLCIKSKATMLGMKRDCGGAAAILGAFYSTVKLGFTENLHAIFCLAENAISPDALRPDDIINMYSGRTVEVNNTDAEGRLVLSDGVAYAQKDLKADIVIDVATL…	>tr|A0A6P7TKE4|A0A6P7TKE4_OCTVU probable aminopeptidase NPEPL1 isoform X1 OS=Octopus vulgaris OX=6645 GN=LOC115223934 PE=3 SV=1	0	22.347	0	21	7	11	0	7	549	59.1	6.4	27.29	21	11	7	0	0	High	High	High	High	High	High	High	High	High	1
High	Master Protein	-7295767118890289633	67	Cluster-58773.174510;orf1 len=264 frame:2 start:62 end:853 gi	260829110 ref|XP_002609505.1| hypothetical protein BRAFLDRAFT_127655 [Branchiostoma floridae]>gi|229294862|gb|EEN65515.1| hypothetical protein BRAFLDRAFT_127655 [Branchiostoma floridae]	RWGRRERETAWVLYYKVKVVLFSRLFSYHVRTHTNMLRFAIVLCLASVAYGCCAPEYFTAHTLIRAYVNESFIKGSGVVFYDYSGGIYSAFTNLTVDAEHQIFSLTSTHVDLNKGEVYIMTGGICYKTPLDKSWISQEDLPHCIPKSAKKTAQFSVGGPHEDVEMSTYMQRIKAGFREMTVTKHYCYPLQEVFYTQTKSQQGHNQRTATMSQLANLEEFIEDPSVFEIPSICFKSSYNKVTNTFRLLSFAFFKSFGCSHAGAPP	>Cluster-58773.174510;orf1 len=264 frame:2 start:62 end:853 gi|260829110|ref|XP_002609505.1| hypothetical protein BRAFLDRAFT_127655 [Branchiostoma floridae]>gi|229294862|gb|EEN65515.1| hypothetical protein BRAFLDRAFT_127655 [Branchiostoma floridae]	0	21.663	0	22	4	9	0	4	264	30.1	8.41	25.96	22	9	4	0	0	Not Found	High	High	Not Found	High	High	Not Found	High	High	1
High	Master Protein	5598926534264320657	323	Cluster-58773.83035;orf1 len=470 frame:3 start:477 end:1886 gi	554820859 ref|XP_005921157.1| PREDICTED: thymidine phosphorylase-like isoform X1 [Haplochromis burtoni]	IRQPNFAVTPGTMSTKEISNIILKKSSGGRLSSHEIQLFVKDLLTENYVTKAQIGALLMAIYLKGIDVDETSFLTNAMISSGSRLSWDPNWKDCLVDKHSTGGIGDKISLVLAPALAACGMKVPMMSGRSLGHTGGTLNKLESIPGFSVDQSKENCRRILNDVGCCIMSQTIDLAPADKILYQSRDQTNTVSEMGLITGSIISKKGVEGINGLILDVKYGKAAFMTTEEKAKQLAERMVETSCKLGIKTRAVLTKMDNPLGKMASNGTLEIIESVQCLKGNGPKDIMELVTHQGAHLLLMMNKVESLEEGLKRMQGSINDGTALKKLQEMMVAQGVENTIAHQLCQSEDTWQMFTEQNRTAKYITEFKADKDGYIQAIDALCCGKVIVKLGAMEVKADE…	>Cluster-58773.83035;orf1 len=470 frame:3 start:477 end:1886 gi|554820859|ref|XP_005921157.1| PREDICTED: thymidine phosphorylase-like isoform X1 [Haplochromis burtoni]	0	21.485	0	18	9	11	0	9	469	51.1	6.71	25.23	18	11	9	0	0	Not Found	High	High	Not Found	High	High	Not Found	High	High	1
High	Master Protein	6113786487822800077	331	Cluster-58773.161841;orf1 len=169 frame:-2 start:507 end:1 gi	340742817 gb|AEK65120.1| arginine kinase [Amphioctopus fangsiao]	WEALKKVDSNSLLKKHLTPARYEKLKNKKTKFGGTLADCIRSGCKNPDSGVGIYASDPDAYTVFAEVLDAVIMDYHKIDKVTHPVPDFGDVNNLNIGDLDPSGNLIVSTRVRVGRSHDSFGFPPVLKKEDRVKMEQVSVEALKSLDGELAGSYYPLSNMTPEVQNQLTD	>Cluster-58773.161841;orf1 len=169 frame:-2 start:507 end:1 gi|340742817|gb|AEK65120.1| arginine kinase [Amphioctopus fangsiao]	0	21.408	0	44	6	8	1	2	169	18.6	6.55	25.55	44	8	6	0	0	Not Found	High	Not Found	Not Found	High	Not Found	Not Found	High	Not Found	1
High	Master Protein	-1458108204528685987	214	Cluster-58773.89511;orf1 len=572 frame:2 start:377 end:2092 gi	524875173 ref|XP_005094317.1| PREDICTED: alpha-aminoadipic semialdehyde dehydrogenase-like [Aplysia californica]	PTSAREDIKTKVGKLLHRLPPMAATITRVSQLICVPLLHRSIGPAFRNSSRLLSLSVTNMDKFLINDSKYSWLKELGLSSHNHGVYFGKSWCGSGEVVTSMCPANNLPIAQVTQGNPADYEHAIAATKEAWNVWVEMPGPQRGEIVRQIGEALRHKKHLLGKLESLEMGKILPEGEGEVQEFIDIADYAVGLSRMFAGHVFPSERKGHALLEQWNPVGTVGIITAFNFPVAVYGWNACIAMVTGNTLLWKGAPSTPLTSIATTKIVQSVLEANSLPGAISSLVCGGADVGNLMATDERVNLLSFTGSTAIGKLVSLKVHERFGKCLLELGGNNALIVNDDADLEMVVRSALFACAGTAGQRCTTTRRLILHEKVHDEVVTKLVKAYGQLSIGDPMEPGI…	>Cluster-58773.89511;orf1 len=572 frame:2 start:377 end:2092 gi|524875173|ref|XP_005094317.1| PREDICTED: alpha-aminoadipic semialdehyde dehydrogenase-like [Aplysia californica]	0	21.314	0	15	6	7	1	4	571	61.6	7.69	23.45	15	7	6	0	0	Not Found	High	High	Not Found	High	High	Not Found	High	High	1
High	Master Protein	-7823555055521777212	57	A0A6P7SYF3	retinal dehydrogenase 1 OS=Octopus vulgaris OX=6645 GN=LOC115217862 PE=3 SV=1	MSAGIPPPIKDVKIKYSQIFINNEFVNSVSGKTFPTLNPCHGEPICQVQESDKADVDKAVAAAKAAFKWGSEWRRTDASKRGLLLNKLADLIERDLVYAASLETLDCGKPYKAAFGDIAFSVNCLRYYAGWADKVEGKTIPVDGDFFCYTKHEPVGICGQIIPWNYPIPMFIWKIAPALACGNVCVVKPAEQTPLTALYMGALIKEAGFPPGVVNIVPGYGPTAGAAISTHPEINKVAFTGSTEVGQVIMQAAGASNLKRCSLELGGKSPCVIFADADLDSAVAVAHEAVMTNMGQCCVAGSRTYVQEGIYDEFVAKSVARAQKRKVGDPFDSETENGPQVDADQLSKIIDLVKSGESEGARMMCGGKQKGDKGYFMEPTVFADVKDNMRISKEEIFGP…	>tr|A0A6P7SYF3|A0A6P7SYF3_OCTVU retinal dehydrogenase 1 OS=Octopus vulgaris OX=6645 GN=LOC115217862 PE=3 SV=1	0	20.608	0	17	7	7	0	7	496	53.6	6.16	20.86	17	7	7	0	0	Not Found	High	Not Found	Not Found	High	Not Found	Not Found	High	Not Found	1
High	Master Protein	-7197143773677841288	72	Cluster-58773.161692;orf1 len=264 frame:-3 start:814 end:23 gi	512130272 gb|AGN96214.1| 14-3-3 protein epsilon [Octopus bimaculoides]	SEMADREELVYMAKLAEQAERYDEMVSNMKSVANQGTELSVEERNLLSVAYKNVIGARRASWRIISSLEQKEDSKGNEQRLRLIRSYRENIEIELKKICEDVLDVLDKQLLPIASSGESNVFYFKMKGDYHRYLAEFAIGDDRKETADESLKAYKRASDIAANELTSTHPIRLGLALNFSVFYYETLSNPMRACALAKTAFDEAIAELDTLSEESYKDSTLIMQLLRDNLTLWTSDMQTEECDQKADPKGEQPQDGGDPAPEA	>Cluster-58773.161692;orf1 len=264 frame:-3 start:814 end:23 gi|512130272|gb|AGN96214.1| 14-3-3 protein epsilon [Octopus bimaculoides] >Cluster-58773.162168;orf1 len=264 frame:2 start:1271 end:2062 gi|512130272|gb|AGN96214.1| 14-3-3 protein epsilon [Octopus bimaculoides]	0	20.112	0	18	3	7	1	1	263	29.8	4.77	20.99	18	7	3	0	0	High	High	Not Found	High	High	Not Found	High	High	Not Found	1
High	Master Protein	3479147454820676645	291	A0A6P7TYT0	Histidine--tRNA ligase OS=Octopus vulgaris OX=6645 GN=LOC115230998 PE=3 SV=2	MQFNAEKEKIAEEVAKLLELKAKLGDESGPKKFVLKTPKGTRDFSPQQMTIRENVFATIIECFKRHGAETIDTPVFELKETLTGKYGEDSKLIYDLVDQGGEILSLRYDLTVPFARYLAMNKITNIKRYQIAKVYRRDQPAMTKGRYREFYQCDIDIAGQYDPMIPDAECVRMVSSILTELDIGNYEIKVNHRKLLDGIFAACGVPEKDFRPICSAVDKLDKMDWCDVRKEMTDEKGLAPETADRIWEYVKLKGKMELVDRLNNDSVLMAQKPAAEGVADMKLLLKYCDIYGCLDKVSFDLSLARGLDYYTGLIYEGILKGYTYKSDSGDSTESVAVGSVAGGGRYDGLVGMFDPKGKEVPCVGVSIGIERIFAIMEAKVLADNAKIRTTSTEVYVISA…	>tr|A0A6P7TYT0|A0A6P7TYT0_OCTVU Histidine--tRNA ligase OS=Octopus vulgaris OX=6645 GN=LOC115230998 PE=3 SV=2	0	19.938	0	11	4	5	0	1	487	55	6.23	18.88	11	5	4	0	0	Not Found	High	Not Found	Not Found	High	Not Found	Not Found	High	Not Found	1
High	Master Protein	-4249428279887448417	152	Cluster-58773.47482;orf1 len=193 frame:2 start:59 end:637 gi	443711424 gb|ELU05212.1| hypothetical protein CAPTEDRAFT_211623 [Capitella teleta]	NTIDIPTTSFYQIFYLFLITESTQVFWFPRYNYVFLKRILPSQNNSQTSVRDKMKVIILISLLTVFTIDGIYGQRDGGRTLPDDEYSRHIFTRLNGNNDSHIDFHEIKFAFTKLDKDDDGSVSKLEFVEAVQAQEHPQNAKIFGMFEKLDTDKDGKWNLVDIRRTFNIMDDDGNGELTDVEFIPAWIKMMNS	>Cluster-58773.47482;orf1 len=193 frame:2 start:59 end:637 gi|443711424|gb|ELU05212.1| hypothetical protein CAPTEDRAFT_211623 [Capitella teleta]	0	19.737	0	27	5	10	4	5	192	22.4	5.17	28.68	27	10	5	0	0	Not Found	High	High	Not Found	High	High	Not Found	High	High	1
High	Master Protein	4798294011263368897	310	A0A6P7UAQ3	14 kDa fatty acid-binding protein OS=Octopus vulgaris OX=6645 GN=LOC115232340 PE=4 SV=1	MSIDLFRGKWKQGEEMPENFEAFMDATGVYKDKRDQVSKIRFITDFDNDGDKWVCKISVEGMPEPKVYIYKFNEAYSSTDLMGTTFTCVVTKLTDNKIQETITEWSDSEVITTREVHDDGTMTVVTSCKGVSFSSKFAKF	>tr|A0A6P7UAQ3|A0A6P7UAQ3_OCTVU 14 kDa fatty acid-binding protein OS=Octopus vulgaris OX=6645 GN=LOC115232340 PE=4 SV=1	0	19.466	0	55	5	11	1	5	140	16	4.98	30.37	55	11	5	0	0	High	High	High	High	High	High	High	High	High	1
High	Master Protein	3849989441029660775	296	Q9TWW9	ALPHAM, alpha-macroglobulin proteinase inhibitor (Fragment) OS=Octopus vulgaris OX=6645 PE=1 SV=1	DEIDEGHYMILVPRNFVHGK	>tr|Q9TWW9|Q9TWW9_OCTVU ALPHAM, alpha-macroglobulin proteinase inhibitor (Fragment) OS=Octopus vulgaris OX=6645 PE=1 SV=1	0	19.355	0	70	1	6	1	1	20	2.4	5.62	19.2	70	6	1	0	0	Not Found	High	High	Not Found	High	High	Not Found	High	High	1
High	Master Protein	-4770806795344153966	135	A0A6P7SQT5	cathepsin L1-like OS=Octopus vulgaris OX=6645 GN=LOC115215560 PE=3 SV=1	MKMKSLVAVLLFVACAASVPLSDNFLDQSWQTYMKLFNKKYETAENEFVRRVIWEKNLQYVNQHNLEADMGLHTYWLGLNEYADLENREFVKKMNNLIPRNLTTYKPKLIFANDNIKDLPDTVDWRTKGYVTEVKNQAQCGSCWAFSTTGSLEGQIFKKTGKLVSLSEQNLVDCSASFGNNGCEGGLMDNAFKYIKKFGIDSEASYPYEGVDAKCRYKKSEVVATDTGYVDVKSMSEDSLQSAVAKVGPISVAIDAGHLSFQLYKHGVYKESRCSATALDHGVLAAGYGTDNGQDYWLVKNSWGGSWGVKGYIKMARNHNNMCGIATQASYPTV	>tr|A0A6P7SQT5|A0A6P7SQT5_OCTVU cathepsin L1-like OS=Octopus vulgaris OX=6645 GN=LOC115215560 PE=3 SV=1	0	19.223	0	15	5	6	0	4	334	37.3	7.62	15.2	15	6	5	0	0	Not Found	High	High	Not Found	High	High	Not Found	High	High	1
High	Master Protein	-6434004285237110858	95	A0A6P7TRF4	catalase OS=Octopus vulgaris OX=6645 GN=LOC115228352 PE=3 SV=1	MANRDKVSDQLKHYKEDHPRPDTMTTGTGAPVGNKTASLTVGPRGPILLQDFVFTDEMAHFNRERIPERVVHAKGAGAFGYFETTHDIRKYCKAAPFQTIGKRTKVGIRFSTVGGESGSADTARDPRGFAVKFYTEDGNWDLVGNNTPIFFIRDPILFPSFIHTQKRNPKTHCKDPDMFWDFITLRPETTHQVCFLFSDRGTPDGYRRMNGYGSHTFKMVNQNSEAVYCKFHFKTNQGIKNLMADKAAGLSASDPDYAIRDLHNAIENSNFPSWTLYIQVMTFKEAENFRWNPFDLTKIWPHSEFPLIPVGRMVLDTNPKNYFAEVEQIAFSPAHMIPGIEPSPDKMLQGRLYSYSDTHRHRLGSNYLQLPVNCPFRSRLANYQRDGPQCVTDNQGGTP…	>tr|A0A6P7TRF4|A0A6P7TRF4_OCTVU catalase OS=Octopus vulgaris OX=6645 GN=LOC115228352 PE=3 SV=1	0	19.106	0	14	5	7	0	5	512	58.3	8.19	17.28	14	7	5	0	0	Not Found	High	High	Not Found	High	High	Not Found	High	High	1
High	Master Protein	-2606217794854463129	179	A0A7E6FT44	4-hydroxyphenylpyruvate dioxygenase OS=Octopus vulgaris OX=6645 GN=LOC115226087 PE=3 SV=1	MTTYTDKGEKPESGRFVSFAHLTFWVGNAKQAASYYCTRFGFEPFAYKGLETNSRQVVSHAIKQNNIIFVLQSMLEPNTPEKMGQHLVKHGDGVKDIAFQVEDLEAIFKHSTAKGAMVVHEPWEESDDDGVVKFATVQTYGDTTHTFVDRSNYKGPFLPGYKMINEKDPLLPNLPVIDLKFIDHIVGNQPQDSMLNVAEWYEKNLQFHRFWSVDDKQIYTQYSSLRSIVVTNYEETIKMPINEPVVGKKKSQIQEYVDYYGGAGVQHIALNTDDIIKSVQNLLNRGLKFLTIPDMYYINLRERLKTSKVQVKENLDMLHKLQILIDYDDEGYLLQIFSKPLQDRPTVFIEVIQRHNHSGFGVGNFKSLFEAIEIDQDKRGNLS	>tr|A0A7E6FT44|A0A7E6FT44_OCTVU 4-hydroxyphenylpyruvate dioxygenase OS=Octopus vulgaris OX=6645 GN=LOC115226087 PE=3 SV=1	0	18.923	0	15	4	6	1	4	383	44	6.37	19.71	15	6	4	0	0	Not Found	High	High	Not Found	High	High	Not Found	High	High	1
High	Master Protein	7382466937618985622	348	A0A7E6EY74	twitchin OS=Octopus vulgaris OX=6645 GN=LOC115213975 PE=3 SV=1	MGVGDDVAPRFTQKPTLKQENGGKKLVFLCVLEASPEPEIKWFLGTTPLNPSDKLKMRLEPKGGPTYNVIMDLFNVSKEDAGTYKVVAKNKLGEVSATINLNLGGAQNQQEGLAPNFTTKPATRQVGKNLVMECQLSADPKPTIEWFRDDTKLAAGGNITMRMDPKGPKAYALTLEIKNVGNADAGSYKIVAKNDLGESNATIKLNFDSMGAEPKGKPMFTSKPAIRQLGEKLIIECKLTADPKPDIAWQLNNKTVSQNQRIKMQIRSLGKNHTISLEINKVGSADGGEYKAIAKNTAGESTATINLNFEGKQTEAGKAPHFTQKPIIKQPQKNQLTMTCNLESSSQPVIKWFREATEIKQGGRYTIQTTKDPKGPNMYIIVLTIKDPAPADGGVYKCV…	>tr|A0A7E6EY74|A0A7E6EY74_OCTVU twitchin OS=Octopus vulgaris OX=6645 GN=LOC115213975 PE=3 SV=1	0	18.873	0	2	5	5	0	5	4922	547.8	6.3	14.79	2	5	5	0	0	Not Found	High	Not Found	Not Found	High	Not Found	Not Found	High	Not Found	1
High	Master Protein	-3240610666046858762	166	A0A0L8HJ80	Major vault protein OS=Octopus bimaculoides OX=37653 GN=OCBIM_22013292mg PE=4 SV=1	MSAAEKKAKTSSTMEDSMINRIPPYYYLHVLDQNTNVTRVVIGPKTYIRQENEKIVMPPVNMMTIPPRHFCIIVNPVKYDTDGSISYDKYGQAELAHGDEEIRFTQSPFPLYPGEKIKQSVTALQVVKTDSGLRLLANVDFTDESNTKRLAGDEWMFLGPGTYIPRKEVAVLTTVNAKVIRPNQALRLRARRECVDCNGIKRVTGEEWLVKTTGAYLPRAYEEVVKTIDAYILTETTALKVKALQNFEDRFNKLREAGEEWLININDTKSYIPDVYEEVTGIEDILTLTNSNYCVVVNPVDANGKPQLGEKKLVKGPKSFFLLPGELLPDGIQDNYVLHEGQALICSCNEHFLDTLNNVNRKPGDRWMISGPIDYVPPVEVEIIRTNESIALDENEGLY…	>tr|A0A0L8HJ80|A0A0L8HJ80_OCTBM Major vault protein OS=Octopus bimaculoides OX=37653 GN=OCBIM_22013292mg PE=4 SV=1	0	18.678	0	8	7	8	0	7	871	97.3	5.77	16.16	8	8	7	0	0	Not Found	High	High	Not Found	High	High	Not Found	High	High	1
High	Master Protein	-3369049003848517710	164	A0A812DI02	Tubulin beta chain OS=Sepia pharaonis OX=158019 GN=SPHA_52176 PE=3 SV=1	MREIVHVQAGQCGNQIGAKFWEVISDEHGIDPTGTYHGDSDLQLERINVYFNEATGGKYVPRAILVDLEPGTMDSVRSGPFGQIFRPDNFVFGQSGAGNNWAKGHYTEGAELVDSVLDVVRKEAESCDCLQGFQLTHSLGGGTGSGMGTLLISKIREEYPDRIMNTFSVVPSPKVSDTVVEPYNATLSVHQLVENTDETYCIDNEALYDICFRTLKLTTPTYGDLNHLVSATMSGVTTCLRFPGQLNADLRKLAVNMVPFPRLHFFMPGFAPLTSRGSQQYRALTVPELTQQMFDAKNMMAACDPRHGRYLTVAAMFRGRMSMKEVDEQMLNVQNKNSSYFVEWIPNNVKTAVCDIPPRGLKMSATFIGNSTAIQELFKRISEQFTAMFRRKAFLHWYT…	>tr|A0A812DI02|A0A812DI02_SEPPH Tubulin beta chain OS=Sepia pharaonis OX=158019 GN=SPHA_52176 PE=3 SV=1	0	18.585	0	22	6	6	0	6	423	47.4	5.39	18.29	22	6	6	0	0	Not Found	High	Not Found	Not Found	High	Not Found	Not Found	High	Not Found	1
High	Master Protein	1522289193478813729	257	Cluster-58773.147322;orf1 len=499 frame:3 start:3 end:1499 gi	676461383 ref|XP_009055926.1| hypothetical protein LOTGIDRAFT_161773 [Lottia gigantea]>gi|556104570|gb|ESO93222.1| hypothetical protein LOTGIDRAFT_161773 [Lottia gigantea]	GGGDGDGSGCNAYENGMLLITITTIFANAGLLLFSLQFALFFFFHSKQGEKKNPELKTHHSYIEEFSDLDSSVSIYFTLPEKVGALAEALGIFQNHKVSLDHIESRPAREDNKCYDFYVSCSNNGDELKEAIKALKQTSTSLQILTRQAEHGDKAEIPWFPHKICDLDKFANMILSYGSELDADHPGFTDPVYRARRKEFADIAYNYRHGQPIPRIKYTDLEIETWKTIFKELTNLYSTHACKQFRHIFPLLMDNCGYNENNIPQLEDVSKFLQDCTGFRLRPVAGLLSSRDFLAGLAFRVFHSTQYIRHPSKPHYTPEPDVCHELLGHVPLFADPAFAQFSQEIGLASLGAPDEYVQKLATCYWFTVEFGLCRENGDLKAYGAGLLSSFGELQYCLSS…	>Cluster-58773.147322;orf1 len=499 frame:3 start:3 end:1499 gi|676461383|ref|XP_009055926.1| hypothetical protein LOTGIDRAFT_161773 [Lottia gigantea]>gi|556104570|gb|ESO93222.1| hypothetical protein LOTGIDRAFT_161773 [Lottia gigantea]	0	18.203	0	12	6	6	0	6	498	56.5	6.16	19.35	12	6	6	0	0	Not Found	High	Not Found	Not Found	High	Not Found	Not Found	High	Not Found	1
High	Master Protein	-7878645223243906958	54	A0A0L8FRZ6	14_3_3 domain-containing protein OS=Octopus bimaculoides OX=37653 GN=OCBIM_22009637mg PE=3 SV=1	MADREELVYMAKLAEQAERYDEMVSNMKSVANQGTELSVEERNLLSVAYKNVIGARRASWRIISSLEQKEDSKGNEQRLRLICSYRENIEVELKRICKDVLDVLDNQLLPIASSGESNVFYFKMKGDYHRYLAEFAVGDDRKETAEESLKAYKRASEIASSELTSTHPIRLGLALNFSVFYYETLSNPVRACALAKSAFDEAIAELDTLSEESYKDSTLIMQLLRDNLTLWTSDMQTEECDQKADPKGEQPQDGGDPAPEA	>tr|A0A0L8FRZ6|A0A0L8FRZ6_OCTBM 14_3_3 domain-containing protein OS=Octopus bimaculoides OX=37653 GN=OCBIM_22009637mg PE=3 SV=1	0	18.124	0	16	3	8	0	1	261	29.5	4.79	24.07	16	8	3	0	0	Not Found	High	High	Not Found	High	High	Not Found	High	High	1
High	Master Protein	1390307812388045640	253	Q06331	Tubulin alpha chain OS=Enteroctopus dofleini OX=267067 PE=2 SV=1	MRECISIHVGQAGVQIGNACWELYCLEHGIQPSGQMPSDKAVGGKDDSFNTFFSETGSGKHVPRAVFVDLEPTVVDEIRTGLYRQLFHPEQLITGKEDAANNYARGHYTIGKEHIDLVLDRVRKLSDQCTGLQGFLIFHSFGGGTGSGFTSLLMERLSVDYGKKSKLEFSIYPAPQVATAVVEPYNSILTTHTTLEHSDCAFMVDNEAIYDICKRNLDIERPSYTNLNRLISQVVSSITASLRFDGALNVDLTEFQTNLVPYPRIHFPLVTYAPIISAEKAYHEQLAVAEVTSACFEPANQMVKCDPRHGKYMACCMLYRGDVVPKDVNAAIATIKTKRSIQFVDWCPTGFKVGINYQPPTVVPGGDLAKVQRAVCMLSNTTAVAEAWARLDHKFDLMY…	>sp|Q06331|TBA_ENTDO Tubulin alpha chain OS=Enteroctopus dofleini OX=267067 PE=2 SV=1	0	17.518	0	14	5	5	0	2	451	50.2	5.2	14.6	14	5	5	0	0	Not Found	High	Not Found	Not Found	High	Not Found	Not Found	High	Not Found	1
High	Master Protein	-7322147491298529319	65	A0A6P7SVM2	Spectrin beta chain OS=Octopus vulgaris OX=6645 GN=LOC115216977 PE=3 SV=1	MTEVAQIHTGVHWEPGQAPQLVEEGFDSGSNSSKLFERSRIKALADEREAVQKKTFTKWVNSHLARVGCRISDLYLDLRDGKMLIKLLEVLSGERLPRPTKGKMRIHCLENVDKALTFLHEQKVHLENMGAHDIVDGSARLTLGLIWTIILRFQIQDIIEETENSETKSAKDALLLWCQMKTAGYPNVNVRNFTTSWRDGLAFNAIIHKHRSDLIQYDRLQKSNAMHNLNNAFTVAEEKLGITKLLDPEDVNVEIPDEKSIITYVVTYYHYFSKMKAESVQGKRIGRVIDNAIDTEKMIEEYETLTSDLLEWIEQTIVILNDRKFANSLTGVQEQLTGFNTYRTVEKPPKFVEKGNLEVLLFTLQSKMRANNQRPYLPREGKLISDINKAWDKLEKAEH…	>tr|A0A6P7SVM2|A0A6P7SVM2_OCTVU Spectrin beta chain OS=Octopus vulgaris OX=6645 GN=LOC115216977 PE=3 SV=1	0	17.405	0	3	4	4	0	4	2415	279.8	5.3	13.47	3	4	4	0	0	Not Found	High	Not Found	Not Found	High	Not Found	Not Found	High	Not Found	1
High	Master Protein	-5299040081404466011	119	A0A7E6EZ79	L-threonine ammonia-lyase-like OS=Octopus vulgaris OX=6645 GN=LOC115214389 PE=4 SV=1	MRMELSNTDLQPTVAEMFNAQKSMEGVILKTPLVPLNIDWPYAKIYLKLENLHPVGSFKIRNAFCSFKNLPPNTKSVYTVSTGNFARAVAWFGRRNNIKCTILVPDHAPKCKTDAVEKLGADIVRIEHKEWFEIIAGRKVYEKGENLGVYLHPEFDRNVLAGNGTVALEILQELPDVNTIIIPYGGGALSSGMGTAVKVLKPDVNIYTSEVDTSPQVYECQKAGKAVPCKYTPNFCDGIGGRGCMLPVWKVARKVIDDTIVVSTRDIADAIKLLVESNYVITEGAGASSVAAAMAAKGKLSGNVVCVVTGGNIDNKKLLQVLRGEIPTD	>tr|A0A7E6EZ79|A0A7E6EZ79_OCTVU L-threonine ammonia-lyase-like OS=Octopus vulgaris OX=6645 GN=LOC115214389 PE=4 SV=1	0	17.392	0	14	5	5	0	5	329	35.8	8.24	14.18	14	5	5	0	0	Not Found	High	Not Found	Not Found	High	Not Found	Not Found	High	Not Found	1
High	Master Protein	-7612218369751660370	60	A0A812CBL4	HSPA1s OS=Sepia pharaonis OX=158019 GN=SPHA_33061 PE=3 SV=1	MSVLPRAGKPNIVRAPSLESMSKAVGIDLGTTYSCVGVFQHGKVEIIANDQGNRTTPSYVAFTDTERLIGDAAKNQVAMNPENTIFDAKRLIGRRFDDQSIQTDMKHWPFEVINDSTKPKLRVNFKGDSKIFSPEEISSMVLTKMKETAEAYLGKSVSNVVITVPAYFNDSQRQATKDAGTIAGLNVLRIINEPTAAAIAYGLDKKAGGEKNILIYDLGGGTFDVSILTIEDGIFEVKSTAGDTHLGGEDFDNRMVNHFIQEFKRKHKKDLAQNKRAIRRLRTACERAKRTLSSSTQASIEIDSLYEGIDFYTNITRARFEELNADLFRGTLEPVEKSLRDAKLDKSAIQEIVLVGGSTRIPKIQKLLQDFFNGKELNKSINPDEAVAYGAAVQAAILS…	>tr|A0A812CBL4|A0A812CBL4_SEPPH HSPA1s OS=Sepia pharaonis OX=158019 GN=SPHA_33061 PE=3 SV=1	0	17.241	0	9	5	6	0	2	669	73.4	5.6	17.29	9	6	5	0	0	Not Found	High	Not Found	Not Found	High	Not Found	Not Found	High	Not Found	1
High	Master Protein	-484720996443473287	227	Cluster-58773.152500;orf1 len=343 frame:3 start:201 end:1229 gi	762111820 ref|XP_011438633.1| PREDICTED: adenosine deaminase-like [Crassostrea gigas]>gi|762111822|ref|XP_011438634.1| PREDICTED: adenosine deaminase-like [Crassostrea gigas]>gi|762111824|ref|XP_011438635.1| PREDICTED: adenosine deaminase-like [Crassostrea gigas]>gi|762111826|ref|XP_011438636.1| PREDICTED: adenosine deaminase-like [Crassostrea gigas]>gi|762111828|ref|XP_011438637.1| PREDICTED: ad…	HHSIMDSNNFPAKVELHVHLDGAIRPETLFETAKRRNIELKEKTVEELRERVTESKNEGLGAMLDIFGYFLPIIKGDKQAIAQIAKDFCEDSAKQNIYYAEVRFAPHILADENLSARDVVKIVLDALKTSCAEHKIIIKAILCCMRNIPEIAKDVLQLCNEFKNDGVVGIDVAGAEFFPTPPEIRDVFKEAHKLGIHRTAHAGEIGGPPNVKEAVDDMFAERVGHGYHVIEDDHLYKQIRNDNIHLETCLVSSFRTQAFLREIQNHPVTTFLKDDANFSLNTDDPTVFATCLHNEYAMAEKAGFSKDQIIKTIFNAARSSFLPKAEQNDLLNHLKQIYPGDY	>Cluster-58773.152500;orf1 len=343 frame:3 start:201 end:1229 gi|762111820|ref|XP_011438633.1| PREDICTED: adenosine deaminase-like [Crassostrea gigas]>gi|762111822|ref|XP_011438634.1| PREDICTED: adenosine deaminase-like [Crassostrea gigas]>gi|762111824|ref|XP_011438635.1| PREDICTED: adenosine deaminase-like [Crassostrea gigas]>gi|762111826|ref|XP_011438636.1| PREDICTED: adenosine deaminase-like […	0	16.704	0	16	4	5	0	4	342	38.6	6.05	13.49	16	5	4	0	0	Not Found	High	Not Found	Not Found	High	Not Found	Not Found	High	Not Found	1
High	Master Protein	8624375147872783033	366	Cluster-58773.174459;orf1 len=349 frame:-1 start:1047 end:1 gi	676459799 ref|XP_009055418.1| hypothetical protein LOTGIDRAFT_153262 [Lottia gigantea]>gi|556105140|gb|ESO93792.1| hypothetical protein LOTGIDRAFT_153262 [Lottia gigantea]	ATMAEEEIAALEKAVQDQTEFLQQLERKNAGEEKIAEEVAKLLELKAKLGDESGPKKFVLKTPKGTRDFSPQQMTIRENVFATIIECFKRHGAETIDTPVFELKETLTGKYGEDSKLIYDLVDQGGEILSLRYDLTVPFARYLAMNKITNIKRYQIAKVYRRDQPAMTKGRYREFYQCDIDIAGQYDPMIPDAECVRMVSSILTELDIGNYEIKVNHRKLLDGIFAACGVPEKDFRPICSAVDKLDKMDWCDVRKEMTDEKGLAPETADRIWEYVKLKGKMELVDRLNNDSVLMAQKPAAEGVADMKLLLKYCDIYGCLDKVSFDLSLARGLDYYTGLIYEGILKGYTY	>Cluster-58773.174459;orf1 len=349 frame:-1 start:1047 end:1 gi|676459799|ref|XP_009055418.1| hypothetical protein LOTGIDRAFT_153262 [Lottia gigantea]>gi|556105140|gb|ESO93792.1| hypothetical protein LOTGIDRAFT_153262 [Lottia gigantea]	0	16.68	0	13	4	5	0	1	349	39.8	5.27	16.3	13	5	4	0	0	Not Found	High	Not Found	Not Found	High	Not Found	Not Found	High	Not Found	1
High	Master Protein	-7950907781432618287	50	A0A6P7SP92	Carbonyl reductase (NADPH) OS=Octopus vulgaris OX=6645 GN=LOC115215080 PE=3 SV=1	MVQVAVVTGSNKGIGYAIVRALCKKFKGDVIATARDVGRGEAAIAELGKEGCQAKFHQLDITDTKSISALANYLKETYGGLDILVNNAGIAYKQASTAPFTEQAEVSLKCNFAGTLDVCQQIFPLLRPHARVVNVSSMVSIMALQKCSKELREKLTSADLTIPQLENLLAQFVTDVKNGDHAAKGWPSTAYGVSKMGVTAMSIIQQKVLDSEGKEDIVVNACCPGYVDTDMTSHKGHKTIDEGADTPVYLALLPPNVKEPRGNYVSERQIHEWK	>tr|A0A6P7SP92|A0A6P7SP92_OCTVU Carbonyl reductase (NADPH) OS=Octopus vulgaris OX=6645 GN=LOC115215080 PE=3 SV=1	0	16.67	0	25	6	6	0	6	274	29.6	7.37	18.98	25	6	6	0	0	Not Found	High	Not Found	Not Found	High	Not Found	Not Found	High	Not Found	1
High	Master Protein	-2338432726729375632	187	A0A6P7TG88	chymotrypsin B-like OS=Octopus vulgaris OX=6645 GN=LOC115222971 PE=4 SV=1	MLLILCLAALAYGMPLEEPIEYGIDEDLFINSSYIVAGQKANNCEFPSIVSLQIQKNGKTFLCGGSIMDANHVITAAHCVASGVTRIIVFYGATSARQAKFTYATKINAHPGFYTTSRALHNDVAILKLGKPILMSTCVKAIPLASTHTDFAGKTCITAGWGKTSWTSQPTTYLRKVSLPIMSYKECHAQWNYIGHEHICAGDWIPGGASPCQGDSGGPLYCMSNGHYVLAGLVSFGLKCEYGPAMYTSVSYFRTWINANTV	>tr|A0A6P7TG88|A0A6P7TG88_OCTVU chymotrypsin B-like OS=Octopus vulgaris OX=6645 GN=LOC115222971 PE=4 SV=1	0	16.491	0	32	6	7	1	1	262	28.3	7.97	18.71	32	7	6	0	0	Not Found	Not Found	High	Not Found	Not Found	High	Not Found	Not Found	High	1
High	Master Protein	-9121441012134759285	3	A0A6P7TPW3	2-phospho-D-glycerate hydro-lyase OS=Octopus vulgaris OX=6645 GN=LOC115224300 PE=3 SV=1	MVIKKIHGRQIFDSRGNPTVEVDLWTDKGMFRAAVPSGASTGIHEALEMRDQDKKNYHGKSVFKAVDNVNKIIAKELPGKHMDEKDQTAVDEFLLSLDGTENKSKLGANAILGVSLAVCKAGAAAKGVPLYRHIADLAGNKEVILPVPAFNVINGGSHAGNKLAMQEFMILPTGAKSFTEAMKMGTEIYHHLKAVIKKKYGQDACNVGDEGGFAPNIQDNKEGLELLKTAIANAGYSDKIEIGMDVAASEFCKEKKYDLDFKNPNSDSSKWLTSDELADLYKGFVKDYPVTSIEDPFDQDDWEAYSKFTGEMSIQIVGDDLLVTNPKRVQKGIDIKAANALLLKVNQIGSVTESIKACKMSQDAGWGVMVSHRSGETEDTFIADLVVGLCTGQIKTGAP…	>tr|A0A6P7TPW3|A0A6P7TPW3_OCTVU 2-phospho-D-glycerate hydro-lyase OS=Octopus vulgaris OX=6645 GN=LOC115224300 PE=3 SV=1	0	16.467	0	12	6	6	0	6	433	47.3	6.7	18.83	12	6	6	0	0	Not Found	High	High	Not Found	High	High	Not Found	High	High	1
High	Master Protein	2047273760870383181	267	A0A6P7TH79	Ferritin OS=Octopus vulgaris OX=6645 GN=LOC115223217 PE=3 SV=1	MAESRPRQNFSKCCEEGINKQINLELYASYVYQSMAYYFDRDDVALKGFFEFFKKRSEEEKEHAEKFMKYQNKRGGRIILKPIEKPAHDAWGGGLRAVEISLDLEKDVNAALLKLHKIAEESGDPQMMDFIESEFLGEQVDDIKLLSDHITNLERVGKGLGEYIFDKNLDS	>tr|A0A6P7TH79|A0A6P7TH79_OCTVU Ferritin OS=Octopus vulgaris OX=6645 GN=LOC115223217 PE=3 SV=1	0	16.348	0	33	5	5	0	5	171	19.8	5.24	14.21	33	5	5	0	0	Not Found	Not Found	High	Not Found	Not Found	High	Not Found	Not Found	High	1
High	Master Protein	-4195254425877584134	155	Cluster-58773.173059;orf1 len=230 frame:3 start:1440 end:2129 gi	406055040 gb|AFS33112.1| calreticulin [Hyriopsis cumingii]	KLITRKLKVAIWNLTGTSCHPRKSRTLVQRNQKIGMIVRKWMTLMTKKPEDWDQPEHIPDPDAKKPDDWDDDMDGEWEPPMIDNPAYKGEWKPKQIDNPNYKGEWIHPEIDNPDYSPDTNLYKYTSIGAVGFDLWQVKSGTIFDNIFVGNSVADADEHAKETWAKTKDPEKKMKDQQEEEERKVREDEEKKMKDEEADKKKDDEEEDEDEDEDEEEEEEPKKDSHGGEL	>Cluster-58773.173059;orf1 len=230 frame:3 start:1440 end:2129 gi|406055040|gb|AFS33112.1| calreticulin [Hyriopsis cumingii]	0	16.264	0	22	3	3	1	1	229	26.9	4.73	12.94	22	3	3	0	0	Not Found	High	Not Found	Not Found	High	Not Found	Not Found	High	Not Found	1
High	Master Protein	9144914076924849329	374	Cluster-58773.93343;orf1 len=501 frame:1 start:1 end:1503 gi	762076444 ref|XP_011445523.1| PREDICTED: xylose isomerase-like [Crassostrea gigas]	IKSFAALYFTGPGNMEDKVDPGVICTHNVNSGAIKLPAFSHGSFNPPFVVVKFCCLYIFNKKKIDGIEKIPFQPDAGPAETMVFKHYNPTKVVYGKTMEEWLRFSVCFWHTFRGTGADPFGFPTLFRPWDDNSNTIANAKRRLRAAFEFFSKLGIKHWCFHDRDIAPEGSTLEETNKNLDELTDLAQELQKKTGVKLLWATCNLFAHPRYMTGASTSPNAHVFAYAAAQVKKGLEIAKKLGAENFVFWGGREGFQTLLNTNILAELTHMANFFKMAVAYKEKIGLKCQFLLEPKPKEPTSHQYDYDAMTVIAFLKHFGLEKHFKLNIEPNHTTLAGHCYDHDVAMASSFGMLGSIDSNTGSPELGWDTDEFPMDVKNTAFVMKTVLQQGGLQPGGLNFD…	>Cluster-58773.93343;orf1 len=501 frame:1 start:1 end:1503 gi|762076444|ref|XP_011445523.1| PREDICTED: xylose isomerase-like [Crassostrea gigas] >Cluster-58773.93344;orf1 len=501 frame:1 start:1 end:1503 gi|762076444|ref|XP_011445523.1| PREDICTED: xylose isomerase-like [Crassostrea gigas]	0	15.963	0	13	5	5	0	5	500	55.9	7.17	12.2	13	5	5	0	0	Not Found	High	High	Not Found	High	High	Not Found	High	High	1
High	Master Protein	-2080801815670583312	194	A0A0L8G196	GDP-D-mannose dehydratase (Fragment) OS=Octopus bimaculoides OX=37653 GN=OCBIM_22002213mg PE=3 SV=1	MAATGADTSNRKVALITGITGQDGSYLAEFLLAKGYEVHGIIRRASTFNTHRIEHLYADPKTHREGSSKNAAMHLHYGDMTDSTNLVKIVSDVQPTEIYNLAAQSHVKVSFELGEYTANVDAVGTLRLLDAIRTCSLSDKVKFYQASTSELYGKVQEIPQKETTPFYPRSPYGAAKLYAYWIVVNYREAYNMFACNGILFNHESPRRGETFVTRKITRAVAKITQGNQEFVELGNLDSKRDWGHAKDYVEAMWMMLQQEEPEDFVIATGETHSVREFLEEAFHVVGTEIQWEGKGVDEVGKDKKTGKVRVKINPKYNRPTEVDLLLGDCSKAKEKLKWSRKYDFK	>tr|A0A0L8G196|A0A0L8G196_OCTBM GDP-D-mannose dehydratase (Fragment) OS=Octopus bimaculoides OX=37653 GN=OCBIM_22002213mg PE=3 SV=1	0	15.93	0	17	4	6	0	4	345	39.1	7.61	17.32	17	6	4	0	0	Not Found	High	High	Not Found	High	High	Not Found	High	High	1
High	Master Protein	-1980815245076134119	198	Cluster-58773.168901;orf1 len=432 frame:1 start:457 end:1752 gi	762151209 ref|XP_011413584.1| PREDICTED: aspartate aminotransferase, mitochondrial-like, partial [Crassostrea gigas]	NPTMALFTSVRSLPRLLPGASPHAGAIHRLSSWWSNVEMGPPDVILGVTEAFKKDNNPKKMNLGVGAYRDDNGKPYILPSVRKAEEMVVAANLDKEYSPIGGDAEYCSSVAKLAFGTDSPVITNKLNVTVQSISGTGALRIGAAYFSKWHSKSKDFYIPSPSWGNHTPILKHSGLEVKSYRYYDPKTCGFDFAGAMEDISKIPEGSVILLHACAHNPTGVDPKPEQWAEMSSVIKSRKIFPFFDMAYQGFASGDTKKDAFAVRKFIEDGHQVSLCQSFAKNMGLYGERAGAFTLVCSDADEAARVMSQVKIIIRPMYSNPPVHGARLVKTILTTPELNAQWLTEVKGMADRIIGMRTKLVEGLAKEGSSKNWQHVTDQIGMFCFTGLTPEQVGRLTKEF…	>Cluster-58773.168901;orf1 len=432 frame:1 start:457 end:1752 gi|762151209|ref|XP_011413584.1| PREDICTED: aspartate aminotransferase, mitochondrial-like, partial [Crassostrea gigas] >Cluster-58773.168923;orf1 len=432 frame:2 start:548 end:1843 gi|762151209|ref|XP_011413584.1| PREDICTED: aspartate aminotransferase, mitochondrial-like, partial [Crassostrea gigas]	0	15.626	0	19	6	6	0	6	431	47.1	8.68	15.1	19	6	6	0	0	Not Found	Not Found	High	Not Found	Not Found	High	Not Found	Not Found	High	1
High	Master Protein	4732792612879278355	309	A0A6P7TJB0	O-methyltransferase MdmC OS=Octopus vulgaris OX=6645 GN=LOC115222932 PE=3 SV=1	MDNSLEGLNLYDPAVKELKLWYETTEDKETKERLLKILQMHIKRDCYSMNLNTPVTPVRREILQFTNTNNWELLAQQKVTQYRLSPNMASGEWAGQVLKMLVSMQKAKTVIEIGMFTGFASLSMAEALPADGQLFACDIEPYLEKSGRSFFDKSPHGKKITVKIGPALETLKTLAKEGVKADFIFIDADKSGYVDYFKSALDNNILAPRGTIAFDNIYWFGEPYLQKGCENTVMARVQKAIIDDPRVEQVLLPVRDGIALVRRVEDI	>tr|A0A6P7TJB0|A0A6P7TJB0_OCTVU O-methyltransferase MdmC OS=Octopus vulgaris OX=6645 GN=LOC115222932 PE=3 SV=1	0	15.315	0	22	6	6	0	6	267	30.3	6.14	14.92	22	6	6	0	0	Not Found	High	Not Found	Not Found	High	Not Found	Not Found	High	Not Found	1
High	Master Protein	8180255965664175381	357	A0A7E6FRZ6	hemocyanin G-type, units Oda to Odg-like OS=Octopus vulgaris OX=6645 GN=LOC115225590 PE=4 SV=1	MAPTRSPWLLGATILCIISIFVPVITNGKFVRKNVDSLTQDEVVSLQVALYSMQKDEGPTGFQAISAYHGEPADCKAADGSTVVCCLHGMPTFPLWHRLYLVQFEQAMASHGSTHGVPYWDWTQPMSELPALVQHPLFIDPSGEKAKKNVFYSGAIAFEKKSTARAVDDHLFDASHGKKNSLLENILMAFEQEEYCRFEVQFEVAHNPVHFLVGGRYTYSMSSLEYTSYDPLFFLHHSNVERLFTIWQALQKHRGHDSKINCGLNLLHTPMEPFGRDSNPIELTKNNAKAADIFTADHLEYNYDDLTLNGMSISELDSLLKERQSHPRSFANFRLGGIKTSANVHISVCIPSKDSRKSDDCHHDAGEFFILGGKREMPWDFGYPYLHDITDTVKSLGLE…	>tr|A0A7E6FRZ6|A0A7E6FRZ6_OCTVU hemocyanin G-type, units Oda to Odg-like OS=Octopus vulgaris OX=6645 GN=LOC115225590 PE=4 SV=1	0	14.607	0	2	5	5	1	1	2923	335.9	6.46	12.23	2	5	5	0	0	Not Found	Not Found	High	Not Found	Not Found	High	Not Found	Not Found	High	1
High	Master Protein	-6517159073257053226	92	A0A6P7TWP3	chymotrypsin-like protease CTRL-1 OS=Octopus vulgaris OX=6645 GN=LOC115226866 PE=4 SV=2	GFNSSADPDNFQVILGEYDTSVDSGDEQKIFVSGIYVHPKFVETSGYPFDIALVKLSQKAQVMPAVVPIALPENSTETFVNRECWVLGWGLTDSAASVIPNVLQEANITAITNEECAERWSFIEILESHLCVYKLASSPCNGDSGGSLACRDGNDTWRLAGVISWGISTCSGDYPAVNTRVSSYLEWIDEVISEN	>tr|A0A6P7TWP3|A0A6P7TWP3_OCTVU chymotrypsin-like protease CTRL-1 OS=Octopus vulgaris OX=6645 GN=LOC115226866 PE=4 SV=2	0	14.525	0	14	2	7	0	2	195	21.2	4.31	18.53	14	7	2	0	0	High	High	High	High	High	High	High	High	High	1
High	Master Protein	-6604209578377385623	90	A0A6P7T7N8	dihydropteridine reductase OS=Octopus vulgaris OX=6645 GN=LOC115219744 PE=4 SV=1	MAVQGRILVYGGKGALGSTCVSYFKSKNFWVGSVDRINNDDAHFNVQVTGSTLHEQNEEIAKKLSESLAGNKLDAILCVAGGWAGGNADSKDFLKSADDMWKQSVWSSVIASSLAAKHLKEGGLLTLPGAAPATDGTPGMIGYGMAKAAVHQLTKSLAGDKSGLPSRAVALATLPVVLDTPNNRKWMAKADQTTWTSMDFVSELFYKWCMDKERPANGSLVKMVTKDGKTDLVLC	>tr|A0A6P7T7N8|A0A6P7T7N8_OCTVU dihydropteridine reductase OS=Octopus vulgaris OX=6645 GN=LOC115219744 PE=4 SV=1	0	14.153	0	15	3	4	0	3	235	25	8.38	15.24	15	4	3	0	0	Not Found	High	Not Found	Not Found	High	Not Found	Not Found	High	Not Found	1
High	Master Protein	-4146753883978043764	158	Cluster-58773.148525;orf1 len=812 frame:2 start:422 end:2857 gi	676447145 ref|XP_009051312.1| hypothetical protein LOTGIDRAFT_201834 [Lottia gigantea]>gi|556109335|gb|ESO97987.1| hypothetical protein LOTGIDRAFT_201834 [Lottia gigantea]	VNSEKVWTIQFDDNGTNTANVGCFVGPENDFKFNDSVYMVMKQRIYYISLEFYMGRTLANTMVNLGIQNACDEAMYQLGLDIEELEEVEEDAGLGNGGLGRLAACFLDSMATLGLAAYGYGIRYDYGIFTQKISNGWQIEEPDDWLRYGNPWEKSRPEYMLPVNFYGRVEHNEKGAKWVDTQLVFALPFDNPIPGYANNTVNTLRLWSAKAPNSFNLKFFNSGEYIQAVCDRNLAENISRVLYPNDNVFEGKELRLKQEYFLVAATLQDVVRRYKSSKFGCPDAVRTSFDTFSDKVAIQLNDTHPSLAIPELMRILIDIERLQWDKAWDICVKTCAYTNHTVLPEALERWPVSLLSNLLPRHLEIMYEINSRFLTEVAKKYPGDGERIKRMSIVEEGHE…	>Cluster-58773.148525;orf1 len=812 frame:2 start:422 end:2857 gi|676447145|ref|XP_009051312.1| hypothetical protein LOTGIDRAFT_201834 [Lottia gigantea]>gi|556109335|gb|ESO97987.1| hypothetical protein LOTGIDRAFT_201834 [Lottia gigantea]	0	14.136	0	8	7	7	0	7	811	92.2	5.9	14.44	8	7	7	0	0	Not Found	High	Not Found	Not Found	High	Not Found	Not Found	High	Not Found	1
High	Master Protein	-6123778309547814645	100	A0A6P7T9I0	Glyoxalase I OS=Octopus vulgaris OX=6645 GN=LOC115221453 PE=3 SV=1	MAALSNEEMLAALHQPDPATKDFFYQQTMYRVKDPKASLTFYSKVLGMRLLHRFDFPPLKFSLYFMGYANENEIPKDEAERFKWCMTSKTAIELTHNWGSETDDSVQYHNGNSSPQGFGHIGVCVPDVDAACKRFEELNVPFKLKLNAGKIKGIAFIMDPDGYWIEIFSGTSVTANINKET	>tr|A0A6P7T9I0|A0A6P7T9I0_OCTVU Glyoxalase I OS=Octopus vulgaris OX=6645 GN=LOC115221453 PE=3 SV=1	0	14.083	0	21	3	5	0	3	181	20.6	6.1	13.43	21	5	3	0	0	Not Found	High	High	Not Found	High	High	Not Found	High	High	1
High	Master Protein	-6724043886819830997	82	A0A6P7SJV4	S-(hydroxymethyl)glutathione dehydrogenase OS=Octopus vulgaris OX=6645 GN=LOC115213890 PE=3 SV=1	MADTTGKPIKCMAAIAWEAKKPLSIEEVEVAPPKSGEVRIKILHSGVCHTDAYTLNGLDPEGIFPVILGHEGAGIVESIGENVTSVKPGDTVIPLYVPQCYECKFCKNPKTNLCQKIRVTQGKGVMPDGTTRFTCKGKEVFHFMGCSTFSEFTVVAEISIAKVNPKAALDKVCLLGCGISTGYGAALNTAAVEKGSNCAVWGLGAVGLAVAMGCKAAGAARIIGIDINESKFEIGKKFGITEFVNPKSHTKPIQQVLCEMTDGGCDFTFECIGNVGTMRAALESCHKGWGTSVIVGVAAAGEEISTRPFQLVTGRVWKGTAFGGFKSRDSVPKLVDDYMNKKLLLDEFVSHKLSFKKINEAFDLMHKGESIRAVLDIPE	>tr|A0A6P7SJV4|A0A6P7SJV4_OCTVU S-(hydroxymethyl)glutathione dehydrogenase OS=Octopus vulgaris OX=6645 GN=LOC115213890 PE=3 SV=1	0	14.067	0	9	3	6	0	3	379	40.5	7.66	16.63	9	6	3	0	0	Not Found	High	High	Not Found	High	High	Not Found	High	High	1
High	Master Protein	4504167888066200400	304	F0V3W2	Hemocyanin (Fragment) OS=Lepidochitona cinerea OX=256056 PE=2 SV=1	DESEIDTDWVIVRKGVSRITPEEATALRVALQAVEDDSSAGGFQTIAGYHGIPTICPSPNAAVKFSCCVHGMSTFAHWHRLYTVQFENALRKQGYTGALPYWDWAKPVSSLPALASDETFTDPGSGESKHNPWLSAKIDAAGGVESKRSPRQELFDQPAFGKFTSLGSQMLLAFEQDDFCDFAVQFEVTHNAIHALVGGNEPYSMASLRYTTFDPIFFLHHSSVDRYWAIWQELQRFRGKAYNKANCALQVMREPLMPFNLEQDVNPDEVTRGNAAPFRVFEYENAFGYRYDNLEFNGMSISQLSHELEGRRSYDREFATFMLHGIQQSALIKFYICLSDDDCDHYGGEFYILGDEAEMPWIYDRAYRYEITDQLKALNVRYGDRFFIRSVTLDLNGNE…	>tr|F0V3W2|F0V3W2_LEPCI Hemocyanin (Fragment) OS=Lepidochitona cinerea OX=256056 PE=2 SV=1	0	13.967	0	3	4	11	2	2	1503	171.8	5.52	24.19	3	11	4	0	0	Not Found	High	High	Not Found	High	High	Not Found	High	High	1
High	Master Protein	-8608828029463485793	30	R9WBT1	14-3-3 protein epsilon OS=Octopus bimaculoides OX=37653 PE=2 SV=1	MSDREQMVYKAKLAEQAERYDEMVESMKEVADQGIELSVEERNLLSVAYKNVIGARRASWRIVSSLEQKEEAKGSEQRVNLIRAYREKIEGELQDICNDVLAVLDKKLLTNASTGESRVFYYKMKGDYHRYLAEFATGEERKDAADNSLLAYKAASEYALKDLPPTHPIRLGLALNFSVFYYEIFNTPDRACRLAKCAFDEAIAELDTLSEESYKDSTLIMQLLRDNLTLWTSDMQAEDCEHKAEGNQNVRQRKCHKQQPI	>tr|R9WBT1|R9WBT1_OCTBM 14-3-3 protein epsilon OS=Octopus bimaculoides OX=37653 PE=2 SV=1	0	13.864	0	20	5	9	0	5	261	30	5.29	25.05	20	9	5	0	0	High	High	High	High	High	High	High	High	High	1
High	Master Protein	9209199775034923649	375	A0A6P7T656	Aconitate hydratase, mitochondrial OS=Octopus vulgaris OX=6645 GN=LOC115219777 PE=3 SV=1	MAYLLRSGLTKRLCTPNMVTQQLRMQSAAASKVAMSKFETSNYIDYDRMKFNVDVVKDRLGRPLTLSEKIVYGHLDKPKEQDIVRGESYLKLRPDRVAMQDATAQMAMLQFISSGLARVAVPSTIHCDHLIEAQIGGEKDLARAKDINKEVYDFLQTAGAKYGVGFWRPGSGIIHQIVLENYAFPGVMIIGTDSHTPNGGGLGGVCVGVGGADAVDVMADIPWELKCPKVIGVELTGKLHGWTSPKDIILKVAGILTVKGGTGAIVEYFGPGVDSISCTGMGTICNMGAEIGATTSIFPYNHRMKDYLVATNRNDIASLADSYRSLLSADKDATYDQLIKINLDELEPHVNGPFTPDRCHSISELGKTAVEMDWPLDVKVGLIGSCTNSSYEDMCRSVS…	>tr|A0A6P7T656|A0A6P7T656_OCTVU Aconitate hydratase, mitochondrial OS=Octopus vulgaris OX=6645 GN=LOC115219777 PE=3 SV=1	0	13.742	0	5	3	3	0	3	783	85.3	6.47	10.13	5	3	3	0	0	Not Found	High	Not Found	Not Found	High	Not Found	Not Found	High	Not Found	1
High	Master Protein	-8203722825871034645	42	Cluster-58773.193716;orf1 len=468 frame:2 start:29 end:1432 gi	676464997 ref|XP_009057101.1| hypothetical protein LOTGIDRAFT_233221 [Lottia gigantea]>gi|556103524|gb|ESO92176.1| hypothetical protein LOTGIDRAFT_233221 [Lottia gigantea]	DTTSNMILPMTYPESVIKSLFTDEESEQIHQLFSKFVVNTSQLEQIKTVTEQNMKFGSSLSPTDRQKTTLLMENTFIEKNLSGNENGTYLGLDLGGTNLRLFRVKFVNGKADTNLKYYKMPAECFKGPSLQVFEFMADCIKDFLTYDNLDKCGRLPLGFTFSFPSTKKSLTDVELIIWTKTFKCTDGPGMNVGQTLEDCLKRKNIPVDLVAIISDVTAALVAGHYLDKQSCIGLILGTGCNVCYIENVKSIDKWQSEPDKSKKVIINIEWGGLSDTGCLSFIQNEFDYEVDKLSNHVNSFTYEKMFSGLYLGELVRQVLADLTKKKILFKGEGSEKLFTPWSWDSSKVSDIERDKDGSDENTKKALDSFDLGGVTSKRDLVLTQFVCSFMSQRGAYVLS…	>Cluster-58773.193716;orf1 len=468 frame:2 start:29 end:1432 gi|676464997|ref|XP_009057101.1| hypothetical protein LOTGIDRAFT_233221 [Lottia gigantea]>gi|556103524|gb|ESO92176.1| hypothetical protein LOTGIDRAFT_233221 [Lottia gigantea]	0	13.517	0	11	4	4	0	4	467	52.1	5.49	11.88	11	4	4	0	0	Not Found	High	Not Found	Not Found	High	Not Found	Not Found	High	Not Found	1
High	Master Protein	305068499109338466	241	A0A6P7T402	uncharacterized HIT-like protein Synpcc7942_1390 OS=Octopus vulgaris OX=6645 GN=LOC115219148 PE=4 SV=1	MDPETKSAQTATAGDPANTIFGKILRGEIKSDFIYEDDKCVAFHDVNKQAPVHILIIPKTPISQISTASDEHKEILGHLLLVAKKLAETETDGNGFRLVINDGKNGGQSVYYIHVHLLANRQMTWPPG	>tr|A0A6P7T402|A0A6P7T402_OCTVU uncharacterized HIT-like protein Synpcc7942_1390 OS=Octopus vulgaris OX=6645 GN=LOC115219148 PE=4 SV=1	0	13.116	0	43	4	6	0	4	128	14.1	6.52	19.91	43	6	4	0	0	Not Found	High	High	Not Found	High	High	Not Found	High	High	1
High	Master Protein	-7528111173745363488	63	Cluster-58773.197059;orf1 len=509 frame:1 start:352 end:1878 gi	260816652 ref|XP_002603202.1| hypothetical protein BRAFLDRAFT_281736 [Branchiostoma floridae]>gi|229288519|gb|EEN59213.1| hypothetical protein BRAFLDRAFT_281736 [Branchiostoma floridae]	TTLSLLLHLSLNSIFLVSLLSLSVPIYLSIPLSIYLPPFSLYHFPHPLSLSLSPPLLLSPFYPSLSLMIKAISTFLSHRFVSTLKLFPKMSFIPVDAESHFPIQNLPYGVFSTEENPHHRIGVAIGDQILDLSVVKHLFTGPELKNSQHVFEMETLNAFMGMTRAAWCEARATLQKILSASEATLRDDSGLRQKAFVPQNKAKMHLPARIGDYTDFYSSKNHAYNVGCMFRGPENALMPNWTYLPVGYHGRASSVIISGTPVRRPNGQTRADESKPPVFGPCRLMDIELEMAFFVGGPSNNLGTNIPMAKAEEHIFGMVVMNDWSARDIQKWEYVPLGPFLAKSIGTSISPWVVTMEALKPFVTDNLPQDPPALPHLSHPDNYNFDIKLDVSIKVPDAS…	>Cluster-58773.197059;orf1 len=509 frame:1 start:352 end:1878 gi|260816652|ref|XP_002603202.1| hypothetical protein BRAFLDRAFT_281736 [Branchiostoma floridae]>gi|229288519|gb|EEN59213.1| hypothetical protein BRAFLDRAFT_281736 [Branchiostoma floridae]	0	13.078	0	9	4	6	1	1	508	56.1	7.14	14.15	9	6	4	0	0	Not Found	High	Not Found	Not Found	High	Not Found	Not Found	High	Not Found	1
High	Master Protein	-7764955635265018113	58	A0A6P7SH66	alpha-actinin, sarcomeric isoform X3 OS=Octopus vulgaris OX=6645 GN=LOC115212896 PE=4 SV=1	MTLGMIWTIILRFAIQDITVEEMSAKEGLLLWCQRKTAPYKNVNVQNFHLSWKDGLAFCALIHRHRPELLDYYKLTRDNPLENLNTAFDVAEKYLDIPRMLDAEDMVNSVKPDERSVMAYVSSYYHAFSGAQQAETAANRICKVLKINQENERLMEEYEKLASDLLAWIRKTTPWLENRHTDNTLPGTQKKLEEFRDYRRKHKPPKLEDKARLENSFNTLQTRLRLSNRPAYLPTEGKTVGDIVFAWKGLESAEKGFEEWLLSELQRLERLDHLAQKFRHKCNIHEEWATGKDVMLDAPLQKCSLQEMKALKKKHEAFESDLAAHQDRVEQIAAIAQELNALNYHDVVTVNTRCQQICDNWDILGTLTQKRRQELEQAERVLERIDQLHLEFAKRAAPF…	>tr|A0A6P7SH66|A0A6P7SH66_OCTVU alpha-actinin, sarcomeric isoform X3 OS=Octopus vulgaris OX=6645 GN=LOC115212896 PE=4 SV=1	0	13.06	0	6	4	4	0	4	769	89.4	5.55	10.6	6	4	4	0	0	Not Found	High	Not Found	Not Found	High	Not Found	Not Found	High	Not Found	1
High	Master Protein	-7268192416136719362	69	A0A7E6EUH0	crystallin J1A OS=Octopus vulgaris OX=6645 GN=LOC115212045 PE=4 SV=1	MKVLGKSSPLLQSVRLVLSPESMATVAERRIGAVIGSLVADAAVQPIHWNYNKEKLTALLSTRSDWEFWEPSQNPFYVQKTGKQTCYGDQNFVVLKSLVENSGINSDHLKKSLYEYFGAGTTYDNPIWSGGPKTIPITGCWRNGSIRDFLKNYEEKKQETGSESDEQVDCVLRIIPVAALYAGHPQLLDKVEEVVRLTQNNDVAVAFGLLAARLLEIYILNGPTADAIGQLRAKLTDPKRSSPSDLDTALVSHLQKVLQVKDKPHVDVACNVFKNN	>tr|A0A7E6EUH0|A0A7E6EUH0_OCTVU crystallin J1A OS=Octopus vulgaris OX=6645 GN=LOC115212045 PE=4 SV=1	0	12.722	0	11	3	5	3	3	276	30.6	7.42	13.84	11	5	3	0	0	Not Found	High	Not Found	Not Found	High	Not Found	Not Found	High	Not Found	1
High	Master Protein	-8038869354831149714	48	A0A0L8GLX8	S-formylglutathione hydrolase OS=Octopus bimaculoides OX=37653 GN=OCBIM_22031609mg PE=3 SV=1	MSNLEQVSSNKCFGGLQKVFKHSSSELKCEMKFGIYLPGKSEFGKLPVLYWLSGLTCTEQNFTTKSGFQRYAAEHNIIVVAPDTSPRGCNIEGEDDSYDFGSGAGFYLDATQPKWSTNYRMYSYIVKELPKLIESNFPVLPEKKSIFGHSMGGHGALTIALKNPTEYKSVSAFAPICNPVNCNWGKKAFTGYLGEKEDGWHAYDACSLIKKNGSPFADILIDQGLADDFLKEQLLTENLEKVITEKGVAATVRKQEVRTWNIIITTIIIII	>tr|A0A0L8GLX8|A0A0L8GLX8_OCTBM S-formylglutathione hydrolase OS=Octopus bimaculoides OX=37653 GN=OCBIM_22031609mg PE=3 SV=1	0	12.71	0	19	4	4	0	4	271	30.1	6.98	11.45	19	4	4	0	0	Not Found	High	Not Found	Not Found	High	Not Found	Not Found	High	Not Found	1
High	Master Protein	-8677193284826339296	26	A0A0L8HN06	Tubulin alpha chain OS=Octopus bimaculoides OX=37653 GN=OCBIM_22010928mg PE=3 SV=1	MRECISIHVGQAGVQIGNACWELYCLEHGIQPSGQMPSDKTIGGGDDSFNTFFSETGSGKHVPRAVFVDLEPTVVDEIRTGLYRQLFHPEQLITGKEDAANNYARGHYTVGKEQIDLVLDRIRKLSDQCTGLQGFLIFHSFGGGTGSGFTSLLMERLSVDYGKKSKLEFSIYPAPQIATAVVEPYNSILTTHTTLEHSDCAFMVDNEAIYDICRRNLDIERPSYTNLNRLIAQVVSSITASLRFDGALNVDLTEFQTNLVPYPRIHFPLATYAPIISAEKAYHEQLNVAEITNACFEPANQMVKCDPRHGKYMACCMLYRGDVVPKDVNAAIAIIKTKRSIQFVDWCPTGFKVGINYQPPTVVPGGDLAKVQRAVCMLSNTTAVAEAWARLDHKFDLMY…	>tr|A0A0L8HN06|A0A0L8HN06_OCTBM Tubulin alpha chain OS=Octopus bimaculoides OX=37653 GN=OCBIM_22010928mg PE=3 SV=1	0	12.655	0	12	4	4	0	1	450	50.1	5.1	12.68	12	4	4	0	0	Not Found	High	Not Found	Not Found	High	Not Found	Not Found	High	Not Found	1
High	Master Protein	5076343679275812649	311	A0A6P7SEM8	Alpha-mannosidase OS=Octopus vulgaris OX=6645 GN=LOC115211875 PE=3 SV=1	MMTRVFCIFLSFLLVVGNQAYPFHSQSCGYESCNPVKDGMINVHLVPHTHDDVGWLKTVDQYFYGAKTKIQNAGVQYILDSVIQELLKDPSRRFIYVEMAFFWRWWHQQHDHTRHIVQKLVKEGRLEFILGGWTMNDEAATHYSAIIDQHTLGFEFLSKTFGECGRPRVAWQIDPFGHSKEMASLFAGMGFDGLFFGRADYQDIVKRVLNKDMEMVWKANQNIGEEADLFTGILLNGYNPPPGFCFDELCQDDPIMDDPRLKENNLNEKLILFSTWVMMKSLTLRTKHIMLTMGSDFQYSNANTWYKNLDKLIKHINAKQAKGSKLNLIYSTPSCYLYQLNRANISWPVKTDDFFPYADRLHSYWTGYFTSRPAIKQFIRESSNLFQVSRHLDVFAQLQ…	>tr|A0A6P7SEM8|A0A6P7SEM8_OCTVU Alpha-mannosidase OS=Octopus vulgaris OX=6645 GN=LOC115211875 PE=3 SV=1	0	12.508	0	6	5	5	0	5	996	114	7.58	11.51	6	5	5	0	0	Not Found	Not Found	High	Not Found	Not Found	High	Not Found	Not Found	High	1
High	Master Protein	8478010875479567722	362	Cluster-58773.192724;orf1 len=110 frame:1 start:409 end:738 gi	340369254 ref|XP_003383163.1| PREDICTED: thioredoxin-like [Amphimedon queenslandica]	KLLIMLIIDSVEKFDQTLKENKDKLIIIDFFATWCGPCKMIAPKLKAMEEEFKSVLFCSVDVDEASEVAEKAGIQAMPTFKFYKGGEEVEEIKGANESKIREALTKYSS	>Cluster-58773.192724;orf1 len=110 frame:1 start:409 end:738 gi|340369254|ref|XP_003383163.1| PREDICTED: thioredoxin-like [Amphimedon queenslandica]	0	12.289	0	23	2	5	1	2	109	12.3	5.01	17.74	23	5	2	0	0	Not Found	High	High	Not Found	High	High	Not Found	High	High	1
High	Master Protein	5431737179842925146	318	A0A6P7SUU8	2-iminobutanoate/2-iminopropanoate deaminase OS=Octopus vulgaris OX=6645 GN=LOC115216465 PE=3 SV=1	MAGICKRIINTVNAPKAIGAYSQAVVVDKTMYISGQLGLNPTTMEFPSNNAAEQADQALKNMSAILKEAGASLSNVVKTTVLLADINDFQAVNEIYSKYFAGTDFPARAAYQVGNLPKLARVEIEAIAVLANSQL	>tr|A0A6P7SUU8|A0A6P7SUU8_OCTVU 2-iminobutanoate/2-iminopropanoate deaminase OS=Octopus vulgaris OX=6645 GN=LOC115216465 PE=3 SV=1	0	12.279	0	39	5	8	0	5	135	14.4	6.65	17.23	39	8	5	0	0	High	High	High	High	High	High	High	High	High	1
High	Master Protein	-6378046856240213032	98	A0A6P7SGA6	Clathrin heavy chain OS=Octopus vulgaris OX=6645 GN=LOC115212844 PE=3 SV=1	MATQLLPIRFQEHLQLQNVGINASNIGFSTLTMESDKYICIREKVGETAQVVIIDLNDATNPIRRPISADSAIMNPASKVIALKAGKTLQIFNIEMKSKMKAHTMTEDVTFWKWISVNTVALVTDTAVYHWGMEGDSQPLKMFDRHSSLAGCQVINYRTDEKQQWLLLIGISAQQNRVVGAMQLYSMERKVSQPIEGHAAAFAQFKMDGNQALSTLFCFAVRGAQGGKLHIIEVGQPPQGNSPFTKKAVDVFFPPEAQNDFPVAMQTSNKHNVIFLITKYGYIHLYDIETATCIYMNRISGDTIFVTAPHEPTNGIIGVNRKGQVLSVSIEEDNVVQYITTTLQNPDLALRLASRCNLPGAEDLFVRKFNNLFQNGQYAEAAKAAAGAPKGILRTPQTI…	>tr|A0A6P7SGA6|A0A6P7SGA6_OCTVU Clathrin heavy chain OS=Octopus vulgaris OX=6645 GN=LOC115212844 PE=3 SV=1	0	12.216	0	2	2	3	0	2	1679	192.5	5.55	12.59	2	3	2	0	0	Not Found	High	Not Found	Not Found	High	Not Found	Not Found	High	Not Found	1
High	Master Protein	-4349786666214086454	150	A0A0L8GZP6	IF rod domain-containing protein OS=Octopus bimaculoides OX=37653 GN=OCBIM_22025456mg PE=4 SV=1	MPNLKRRNQRRTTYRTSLNQGRGSMAMGVPISLTAGVAKESSQRSVAEMKSSSEKEKRDLQGLNSKLANHLEKTRMLEAENKYLKDLLNRAKVEFNVDVIKISYQEQLDDLKALLEDKDKELAAVKSKNESLEEEVEDLTEQLRQVQDERDRLQAEIDGLHDEVARRIADSETSRRRTSELEKQLADWKKRYGILEGQMGELRMVCCNTLNS	>tr|A0A0L8GZP6|A0A0L8GZP6_OCTBM IF rod domain-containing protein OS=Octopus bimaculoides OX=37653 GN=OCBIM_22025456mg PE=4 SV=1	0	12.136	0	7	1	2	0	1	212	24.4	7.3	7.25	7	2	1	0	0	Not Found	High	Not Found	Not Found	High	Not Found	Not Found	High	Not Found	1
High	Master Protein	-3775528057682557617	160	A0A0L8IEX1	Uncharacterized protein OS=Octopus bimaculoides OX=37653 GN=OCBIM_22014847mg PE=3 SV=1	MATPAKVSKAEGKNNHENADEQADKEQQEAIEQIDEVQNEIDRLNEQASEEILKVEQKYNKLRQPYFQKRSELIAKIPNFWVTAFVNHPQVSALLNEEDEEALQYLTKVEVQEFEDIKSGYRINFCFDSNNPYFENDVISKEFHLNDTGEPSSKSTPIKWKPGKDLTKKSSQPGKGGRKRNHEEQESFFCWFTDHGDAGADELGEVIKDDIWPNPLQYYLASEVEEDEGGAGEDEELDEEGLDDEEGEEAEDFDEEDVGEEGEEGEGDAAEDEEEEEG	>tr|A0A0L8IEX1|A0A0L8IEX1_OCTBM Uncharacterized protein OS=Octopus bimaculoides OX=37653 GN=OCBIM_22014847mg PE=3 SV=1	0	11.927	0	23	4	5	0	4	278	31.7	4.23	12.03	23	5	4	0	0	Not Found	High	Not Found	Not Found	High	Not Found	Not Found	High	Not Found	1
High	Master Protein	-7681779584236835341	59	A0A6P7T0X7	ganglioside GM2 activator OS=Octopus vulgaris OX=6645 GN=LOC115218607 PE=4 SV=1	MKLLLLSCLVGFCLADNVLRYQPHRPAQVNLERFRTWIMEHKNLKSFTWSDCGNSSSTLKVKNLIIGPDPVVLPGDLNIGFDLDITEDFDDSLSGSVEIYKKVGAEYIKIPCIGNIGSCDYDDVCGLMEQIPQCPQPFIDNNIPCKCPFKKNSYKMPSSQINVPEDPVPSGDYKATVLLKHKQAFAGCLKVALSIS	>tr|A0A6P7T0X7|A0A6P7T0X7_OCTVU ganglioside GM2 activator OS=Octopus vulgaris OX=6645 GN=LOC115218607 PE=4 SV=1	0	11.866	0	17	3	5	0	3	196	21.7	6.32	11.65	17	5	3	0	0	Not Found	High	High	Not Found	High	High	Not Found	High	High	1
High	Master Protein	-5679632836574657992	111	A0A6P7T7L0	heat shock cognate 71 kDa protein OS=Octopus vulgaris OX=6645 GN=LOC115220772 PE=3 SV=1	MAKSQAIGIDLGTTYSCVGVFQHGKVEIIANDQGNRTTPSYVAFTDTERLIGDAAKNQVAMNPENSIFDAKRLIGRRFTDDVVVADALLWPFKVINDNGKPKVRVNFKGEAKTFSPEEISSMVLTKMKETAEAYLGKTVTNAVVTVPAYFNDSQRQATKDAGTIAGLNVLRIINEPTAAAIAYGLDKKVGGERNVLIFDLGGGTFDVSILAIEDGIFEVKSTAGDTHLGGEDFDNKMVTHFVQEFSRKHKKDLTTNKRAVRRLRTACERAKRTLSSSTQASIEIDSLYEGIDFYTTITRARFEELNALLFKKTLEPVEKSLRDAKMGKTDINDIVLVGGSTRIPRIQKLLQGFFNGKELNKSINPDEAVAYGAAVQAAILSGDKDKEVQDLLLLDVAPL…	>tr|A0A6P7T7L0|A0A6P7T7L0_OCTVU heat shock cognate 71 kDa protein OS=Octopus vulgaris OX=6645 GN=LOC115220772 PE=3 SV=1	0	11.827	0	8	4	5	0	1	652	71.2	5.54	14.36	8	5	4	0	0	Not Found	High	Not Found	Not Found	High	Not Found	Not Found	High	Not Found	1
High	Master Protein	-8906444878875658637	14	A0A7E6ENX1	spectrin alpha chain isoform X2 OS=Octopus vulgaris OX=6645 GN=LOC115227715 PE=3 SV=1	MTDVQPREVKILETAEDIQLRREEVISRYGFFRNACKDRRERLEDSRRYQFFKRDADELESWIYEKLQTASDENYKDPTNLQAKIQKHQAFEAEVAAHSNAIVTLDNAGKEMIDQNHFASQTIQERLDKLHELWPLLISKLSEKGLKLQQALRLVQFMRECDEVMFWINDKYPIEKLEAFVTSEEFGQDLEHVEVLQKKFDEFQKDLANNEDKVVEVNTLADQLLSESHPDAELITTRRQEVNEAWQRLKSRSLFRQERLFGAHEIQRFNRDADETIAWITEKDTVLSSDDHGRDLASVQALQRKHEGVERDLAALEEKVTSLGTEAKRLQEIHTDQAPQIEVKQREIEENWQSLREKAAKRKSRLDDSNNLHRFLADFRDLISWIHDMRAIISADDLA…	>tr|A0A7E6ENX1|A0A7E6ENX1_OCTVU spectrin alpha chain isoform X2 OS=Octopus vulgaris OX=6645 GN=LOC115227715 PE=3 SV=1	0	11.819	0	2	3	3	0	3	2455	283.9	5.06	8.12	2	3	3	0	0	Not Found	High	Not Found	Not Found	High	Not Found	Not Found	High	Not Found	1
High	Master Protein	5504966495460667485	320	Cluster-58773.160867;orf1 len=179 frame:2 start:515 end:1051 sp	P42577 FRIS_LYMST Soma ferritin OS=Lymnaea stagnalis PE=2 SV=2	GTKKPTKMCDSNPRQNFHEDSEAGINRQINMEMYASYVYQSMAFYFDRDDVALKGLYKFFQKRSEEEKEHAEKFMKYQNKRGGRILLKQVEKPDNDDWGTALDAMEAALALEKKVNGSLLELHKIADSHNDAQMMDFIESEYLAEQVDDIKVLSDHITNLKRVGGGLGEYLFDRQLES	>Cluster-58773.160867;orf1 len=179 frame:2 start:515 end:1051 sp|P42577|FRIS_LYMST Soma ferritin OS=Lymnaea stagnalis PE=2 SV=2 >Cluster-58773.160851;orf1 len=179 frame:-1 start:709 end:173 gi|4768842|gb|AAD29639.1|AF117271_1 ferritin [Enteroctopus dofleini]	0	11.682	0	20	3	4	0	3	178	20.6	5.35	10.29	20	4	3	0	0	Not Found	High	High	Not Found	High	High	Not Found	High	High	1
High	Master Protein	8014001743067849390	355	Cluster-58773.198809;orf1 len=296 frame:2 start:149 end:1036 gi	871209239 ref|XP_012941697.1| PREDICTED: carbonic anhydrase 1-like [Aplysia californica]	KSATAQQTLSAVSLVNRRLSSPKYILQPLLEPTVNLRNMCAGTWGYRDDNGPSVWARDYPKAAGQRQSPVNIDSGSTKAVKHDHALKADYSPEPKMSCVNNGLTFVATINGDNFISGGPLDTKSYKLASFHFHWGSNDSHGSEHTINSQAYPAELHLVHWNYNKYDTFAEAAAADDGLSVLGVMLKIGEPNAALKQVCDAMEKVKSPGTNFVMTSAFDLPGLLPGDINKFYTYPGSLTTPPCHESVTWIVCQETIGCSKEQLSTLRSLKNNDNNHLVNNFRPVMPLGNRTICCSN	>Cluster-58773.198809;orf1 len=296 frame:2 start:149 end:1036 gi|871209239|ref|XP_012941697.1| PREDICTED: carbonic anhydrase 1-like [Aplysia californica] >Cluster-58773.198805;orf1 len=296 frame:-3 start:932 end:45 gi|871209239|ref|XP_012941697.1| PREDICTED: carbonic anhydrase 1-like [Aplysia californica] >Cluster-58773.198810;orf1 len=296 frame:2 start:251 end:1138 gi|871209239|ref|XP_012941697.…	0	11.575	0	14	3	4	1	3	295	32.2	7.47	11.98	14	4	3	0	0	Not Found	High	High	Not Found	High	High	Not Found	High	High	1
High	Master Protein	-5214990205777245596	126	A0A6P7SCY0	uncharacterized protein LOC115211594 OS=Octopus vulgaris OX=6645 GN=LOC115211594 PE=4 SV=1	MGNFIGKWEQFDEDIENADAFFKAAGMNDESKIEEMKKTRAIMECQADGDGYKSIYTDMNSGMSKEYHFKVGEPFESDDLHGMKFKAVITLESPTKVKECYTEWSPSEITILREIDGDILTVTFTAKGVSAKCRAKKI	>tr|A0A6P7SCY0|A0A6P7SCY0_OCTVU uncharacterized protein LOC115211594 OS=Octopus vulgaris OX=6645 GN=LOC115211594 PE=4 SV=1	0	11.554	0	38	4	7	0	4	138	15.6	5.02	11.7	38	7	4	0	0	Not Found	High	High	Not Found	High	High	Not Found	High	High	1
High	Master Protein	-5112627667867886510	128	A0A6P7TMY2	Fumarylacetoacetase OS=Octopus vulgaris OX=6645 GN=LOC115226547 PE=3 SV=2	MIKAISTFLSHRFVSTLKLFPKMSFIPVDAESHFPIQNLPYGVFSTEENPHHRIGVAIGDQILDLSVVKHLFTGPELKNSQHVFEMETLNAFMGMTRAAWCEARATLQKILSASEATLRDDSGLRQKAFVPQNKAKMHLPARIGDYTDFYSSKNHAYNVGCMFRGPENALMPNWTYLPVGYHGRASSVIISGTPVRRPNGQTRADESKPPVFGPCRLMDIELEMAFFVGGPSNNLGTNIPMAKAEEHIFGMVVMNDWSARDIQKWEYVPLGPFLAKSIGTSISPWVVTMEALKPFVTDNLPQDPPALPHLSHPDNYNFDIKLDVSIKVPDASEPAVVSRSNFKYMYWTMKQQLVHHTSNGCNVNAGDLMGSGTISGTTEDSYGSLLELSWKGSKTVDVG…	>tr|A0A6P7TMY2|A0A6P7TMY2_OCTVU Fumarylacetoacetase OS=Octopus vulgaris OX=6645 GN=LOC115226547 PE=3 SV=2	0	11.45	0	11	4	6	1	1	441	48.7	7.06	13.43	11	6	4	0	0	Not Found	Not Found	High	Not Found	Not Found	High	Not Found	Not Found	High	1
High	Master Protein	-2865453828410054659	172	A0A6P7TG90	Glutathione transferase OS=Octopus vulgaris OX=6645 GN=LOC115223852 PE=3 SV=1	MSKQPELAYWKIRGLAEPIRLLLRYVSEDYTEKLFEQGDGPEFSRECWYSVKHDFGLDFPNLPYYIDGDNKISQSNAILRYIARKHNLLGESEKDKILVDVMENQAMDFRIGFVRLCYGPNYDKNKPEYLKSVHTSLQDFEKYLGKHTWFGGEKVTFVDFPMYELLDQHKAFDCKLLENYPKLNAFLKRFEELPKIKAYHQSKEYVKLPINNKVAHFQ	>tr|A0A6P7TG90|A0A6P7TG90_OCTVU Glutathione transferase OS=Octopus vulgaris OX=6645 GN=LOC115223852 PE=3 SV=1	0	11.422	0	19	4	4	0	4	218	25.9	7.52	10.09	19	4	4	0	0	Not Found	High	Not Found	Not Found	High	Not Found	Not Found	High	Not Found	1
High	Master Protein	-2048416850324331456	195	A0A7E6EK24	deoxynucleoside triphosphate triphosphohydrolase SAMHD1-like OS=Octopus vulgaris OX=6645 GN=LOC115231394 PE=4 SV=1	MTQSENSSRMDSDQVFHDAIHGSMELPPLCVEIINTIQFQRLRNIKQLGLCYYVFPSASHNRFEHCLGTCYLAGKMVRHLKQQNPDLEISDRDILCVEIAGLCHDLGHAPFSHVFEGFINENRRPDNRWKHEDASCKMLDHLFEENPHVREELEPDEIAFIKDLIIGESENSARPQFLYQIVNNRDYNIDVDKWDYLARDSHFLGIGKSFDHERMIKMSRVIGDQICYRDKTVDNFFDMFYSRYRLHKTAYQHKTVLLFNTLLCETLRSAERHLGIIENVYDMRRFTYFTDSILEEILRNEDNENLRVARNTLNDIIKRSYRYIGTVEDGNDQGEEPGNIVCEANFDYGAGNENPLVKIPFYERGNMHESFNYNPDELEEMLFLPGTFQLNVRYCFERI	>tr|A0A7E6EK24|A0A7E6EK24_OCTVU deoxynucleoside triphosphate triphosphohydrolase SAMHD1-like OS=Octopus vulgaris OX=6645 GN=LOC115231394 PE=4 SV=1	0	11.272	0	11	4	6	0	3	399	47	5.39	17.4	11	6	4	0	0	Not Found	High	High	Not Found	High	High	Not Found	High	High	1
High	Master Protein	2845408266978832980	281	A0A6P7T9Z5	thymosin beta isoform X2 OS=Octopus vulgaris OX=6645 GN=LOC115221752 PE=3 SV=1	MTTTTTTAPRPFLDEIKTTKKDDLQHIDVQEKTALPTKTDIVKEKSEQELRSSIGSFDKAKLNPTETQEKISLPDKTEIDQEKTEQKLRSNINDFDKNQLKHAEVEEKNPLPDKDTIKQEKTEQELKNSINKFDKTELKCTKTCEKTVLPTKADIAQEKGSA	>tr|A0A6P7T9Z5|A0A6P7T9Z5_OCTVU thymosin beta isoform X2 OS=Octopus vulgaris OX=6645 GN=LOC115221752 PE=3 SV=1	0	11.016	0	28	3	3	1	1	162	18.5	5.78	11.92	28	3	3	0	0	Not Found	High	Not Found	Not Found	High	Not Found	Not Found	High	Not Found	1
High	Master Protein	-1959532999407257344	199	A0A6P7T046	glyoxylate reductase/hydroxypyruvate reductase OS=Octopus vulgaris OX=6645 GN=LOC115218137 PE=3 SV=1	MANKVYITRRIPPVGIDLFREKGVEIDFWDSDEAIPHQELVKNVKGKGYAGLLCLLTDQVDAEVFEAAGPSLKVVSTLSVGYEHIDLKACKARNIIACNLSKISTDCVSEFAVTLALAVSRRIEEGIAAVRNGNWGLWKPMWILGSSFANRTIGVLGMGRIGYGVARRMKAFCISRLIYHDIKESSFAQELGAEFVDLETLLKDSDVICICCNLTPATHYLFNKENFKKMKNTAILINTSRGGVINHDDLYDALKNHEIGAAGLDVTEPEPLPKEHRLNSLPNCVVTPHMGSNTWEARNNMSYNAALNIVSVFENQTPIGKIKN	>tr|A0A6P7T046|A0A6P7T046_OCTVU glyoxylate reductase/hydroxypyruvate reductase OS=Octopus vulgaris OX=6645 GN=LOC115218137 PE=3 SV=1	0	11.013	0	15	3	3	0	3	324	35.8	7.15	9.04	15	3	3	0	0	Not Found	High	Not Found	Not Found	High	Not Found	Not Found	High	Not Found	1
High	Master Protein	-7173163022268178719	73	A0A0L8G0V9	Uncharacterized protein OS=Octopus bimaculoides OX=37653 GN=OCBIM_22003270mg PE=3 SV=1	MKSILPVLLVVVTITTSVIAATKKEEDSKKKESVGTVIGIDLGTTYSCVGVFKNGRVEIIANDQGNRITPSYVAFTGDGERLIGDAAKNQLTSNPENTIFDVKRLIGRTWDDKSVQHDIKFYPFKVINKNNKPHVQATVSGEMKTFAPEEISAMVLGKMREIAEAYLGKEIKNAVVTVPAYFNDAQRQATKDAGTIAGLNVMRIINEPTAAAIAYGLDKRDGEKNILVFDLGGGTFDVSLLTIDNGVFEVMATNGDTHLGGEDFDQRVMEHFIKLYKKKKGKDLRKDNRAVQKLRREVEKAKRLLSTQHQARLEIEALYDGEDFSESITRAKFEDLNIDLFRSTMKPVQKVLEDSSLNKKDIDEIVLVGGSTRIPKIQHLVKEFFNGKEPNRGINPDEA…	>tr|A0A0L8G0V9|A0A0L8G0V9_OCTBM Uncharacterized protein OS=Octopus bimaculoides OX=37653 GN=OCBIM_22003270mg PE=3 SV=1	0	11.005	0	7	4	5	0	3	658	72.7	5.4	12.98	7	5	4	0	0	Not Found	High	Not Found	Not Found	High	Not Found	Not Found	High	Not Found	1
High	Master Protein	8429474700871819986	361	Cluster-58773.162300;orf1 len=48 frame:2 start:2 end:145 gi	52550954 gb|AAU84460.1| hemocyanin A-type [Enteroctopus dofleini]	TSSLKQLLLDAHDDFDIKVTIKSIDGHTLPNSYLTPPTVFFVPAKGH	>Cluster-58773.162300;orf1 len=48 frame:2 start:2 end:145 gi|52550954|gb|AAU84460.1| hemocyanin A-type [Enteroctopus dofleini]	0	10.967	0	53	2	3	1	1	47	5.2	6.77	13.46	53	3	2	0	0	Not Found	Not Found	High	Not Found	Not Found	High	Not Found	Not Found	High	1
High	Master Protein	-3680597495400320232	161	Cluster-58773.169829;orf1 len=170 frame:1 start:604 end:1113 gi	762093795 ref|XP_011429361.1| PREDICTED: uncharacterized protein LOC105329712 isoform X1 [Crassostrea gigas]>gi|762093797|ref|XP_011429362.1| PREDICTED: uncharacterized protein LOC105329712 isoform X1 [Crassostrea gigas]>gi|762093799|ref|XP_011429363.1| PREDICTED: uncharacterized protein LOC105329712 isoform X1 [Crassostrea gigas]>gi|405973201|gb|EKC37927.1| hypothetical protein CGI_10009700 [Cra…	RGLLNSKMTTTTTTAPRPFLDEIKTTKKDDLQHIDVQEKTALPTKTDIVKEKSEQELRSSIGSFDKAKLNPTETQEKISLPDKTEIDQEKTEQELRSNITDFDKNQLKHAEVEEKNPLPDKDTIKQEKTEQELKNSINKFDKTELKCTKTCEKTVLPTKADIAQEKGSA	>Cluster-58773.169829;orf1 len=170 frame:1 start:604 end:1113 gi|762093795|ref|XP_011429361.1| PREDICTED: uncharacterized protein LOC105329712 isoform X1 [Crassostrea gigas]>gi|762093797|ref|XP_011429362.1| PREDICTED: uncharacterized protein LOC105329712 isoform X1 [Crassostrea gigas]>gi|762093799|ref|XP_011429363.1| PREDICTED: uncharacterized protein LOC105329712 isoform X1 [Crassostrea gigas]>g…	0	10.859	0	25	3	3	0	1	169	19.2	5.8	11.77	25	3	3	0	0	Not Found	High	Not Found	Not Found	High	Not Found	Not Found	High	Not Found	1
High	Master Protein	319424565343584486	242	Cluster-58773.179191;orf1 len=448 frame:1 start:25 end:1368 gi	260818781 ref|XP_002604561.1| hypothetical protein BRAFLDRAFT_280591 [Branchiostoma floridae]>gi|229289888|gb|EEN60572.1| hypothetical protein BRAFLDRAFT_280591 [Branchiostoma floridae]	IMLKVLSSVLVLLMTSGHYLGLEINLPELENGGVHWALLVAGSNTWSNYRHQADICHAYQVLHKNGIPDERIVVMMYDDIANNRMNPEPGKVINKPNGVNVYEGVPKDYTGDDVTPSVFLNVLQGKKEALNGHGSGKVIASGPQDNVFVYFADHGAPGIVAFPSEYLHASQLHTAIMNMHEQKKYNKMVLYIEACESGSMFPGLPKDIKVFATTAANDHESSYACYYDDKLDTFLGDVYSVCWMENSDKASLSSESLQQQFQIVKKETNTSHVQEFGDMSMKNLKLSAFQGNQRSNNGLVITEEDVEKTVPRFDLSNSVDAHETTMYILRRRLQKAETKEEQEAITAELQDEYLIREIIEDTLQNIVRNATTDQELINRVNEAKNPSLSTACYDEAIDH…	>Cluster-58773.179191;orf1 len=448 frame:1 start:25 end:1368 gi|260818781|ref|XP_002604561.1| hypothetical protein BRAFLDRAFT_280591 [Branchiostoma floridae]>gi|229289888|gb|EEN60572.1| hypothetical protein BRAFLDRAFT_280591 [Branchiostoma floridae]	0	10.64	0	7	2	2	2	2	447	50.3	5.24	8.3	7	2	2	0	0	Not Found	High	Not Found	Not Found	High	Not Found	Not Found	High	Not Found	1
High	Master Protein	-381919712636175811	228	Cluster-58773.155745;orf1 len=271 frame:1 start:403 end:1215 gi	443706878 gb|ELU02754.1| hypothetical protein CAPTEDRAFT_117881, partial [Capitella teleta]	SHTKYHLRPTTVTRMDFAQLSRNISQRYSISSLIAFGVLLVLTIVILHQDSRIGKMEEKSKTNRFISKKSLDDKPDDTPKPGLGSLYTRWGRTTCPPYSKLVYDGVVGGQFFDHTGGGSNLLCLPNDPIWANYTTEVEKGGYIYGSEYQLDLYPTNKLFSFANAKSLHDHNVPCAVCLTRQPAVVMMLPARTKCYDGWTAEYSGYLMTEYYAHKSRNEYVCVDYAPEADPAGYRNENGALLYFVQAVCGSLPCPPYVNGRELTCVVCSKY	>Cluster-58773.155745;orf1 len=271 frame:1 start:403 end:1215 gi|443706878|gb|ELU02754.1| hypothetical protein CAPTEDRAFT_117881, partial [Capitella teleta]	0	10.506	0	11	2	4	0	2	270	30.3	7.99	6.4	11	4	2	0	0	Not Found	High	High	Not Found	High	High	Not Found	High	High	1
High	Master Protein	-3238539591727295699	167	A0A812DBA1	RP-S27Ae OS=Sepia pharaonis OX=158019 GN=SPHA_48671 PE=3 SV=1	MQIFVKTLTGKTITLEVEPSDTIENVKAKIQDKEGIPPDQQRLIFAGKQLEDGRTLSDYNIQKESTLHLVLRLRGGAKKRKKKNYTTPKKNKHKKKKVKLAVLKYYKVDENGKITRLRRECPNEECGGGVFMASHFDRHYCGKCYLTYVFNKPEERV	>tr|A0A812DBA1|A0A812DBA1_SEPPH RP-S27Ae OS=Sepia pharaonis OX=158019 GN=SPHA_48671 PE=3 SV=1	0	10.501	0	24	3	12	0	3	157	18.2	9.73	19.01	24	12	3	0	0	High	High	High	High	High	High	High	High	High	1
High	Master Protein	6317939094121892047	335	A0A6P7U923	fatty acid-binding protein homolog 5 OS=Octopus vulgaris OX=6645 GN=LOC115232159 PE=4 SV=2	MTCVCLYRLGVGFALRKIVSKLSSYTNIQVDESGTWTLDITSTFKNIHLQFKLGEEFDETTGDGRHMKSTFTVEDGALKQIQRATKSGGVDSIIIRKLQEDGTMIAVSNLF	>tr|A0A6P7U923|A0A6P7U923_OCTVU fatty acid-binding protein homolog 5 OS=Octopus vulgaris OX=6645 GN=LOC115232159 PE=4 SV=2	0	10.314	0	31	3	4	0	3	111	12.3	7.28	10.96	31	4	3	0	0	Not Found	High	High	Not Found	High	High	Not Found	High	High	1
High	Master Protein	-1575079936380965794	212	A0A6P7S7L1	Inositol-1-monophosphatase OS=Octopus vulgaris OX=6645 GN=LOC115209728 PE=3 SV=1	MANITLSEEELCEIYETGIQLAKECGHMIKECFYRDKKVTTKASYADLVTETDQNVEKFFTKEIKKHYPGHSVIGEETTADGKKIEFTNNPTWIIDPIDGTTNFVHRIPYTCISIGLTVNKEPVIGIVYNPITDVFFKARKGHGAFCNDKKIAVTGLEEIESAMFIMEFGSNREPDKMAVKFRNLFNLNKASHGLRAYGSAALNMCNVAQGEEDGYAEHGIHCWDIAAGAVIVEEAGGVVIDPSGDKFDLMSRKVLVASSMPLALKMSALLEDPGFERD	>tr|A0A6P7S7L1|A0A6P7S7L1_OCTVU Inositol-1-monophosphatase OS=Octopus vulgaris OX=6645 GN=LOC115209728 PE=3 SV=1	0	10.219	0	20	3	4	0	3	279	30.9	5.33	8.08	20	4	3	0	0	Not Found	High	High	Not Found	High	High	Not Found	High	High	1
High	Master Protein	5999376695260566490	330	Cluster-58773.187542;orf1 len=244 frame:-2 start:928 end:197 gi	524865670 ref|XP_005089662.1| PREDICTED: uncharacterized protein LOC101849508 [Aplysia californica]	VFSENFLITPKLIAPLKKFLKMSEKPELPFGYLGAQEKFAEFGLATDNYTEPEITAQDNQLEIKLKTSKPVKVTCNLIACKDDKETPENVFTHTRDKTITLVVHFPTSGYYKLQIYALPLSDESKTLPGVFNYFINVKRALNAVYPFPKQYAQWKDGCYLCEPLVLHEGSSLAKVNFKCCIPKANAVAVVAEGEWVHLTKDGNENWEGKVPLSQFRGKGIKVTLNANFGPDETKYSTLLEYNI	>Cluster-58773.187542;orf1 len=244 frame:-2 start:928 end:197 gi|524865670|ref|XP_005089662.1| PREDICTED: uncharacterized protein LOC101849508 [Aplysia californica]	0	10.127	0	15	3	3	0	3	243	27.4	7.66	9.28	15	3	3	0	0	Not Found	High	Not Found	Not Found	High	Not Found	Not Found	High	Not Found	1
High	Master Protein	5216579824786715577	314	A0A6P7T0G1	Phosphoglycerate kinase OS=Octopus vulgaris OX=6645 GN=LOC115218470 PE=3 SV=1	MAFNKLGIDDIDVSDQRVLLRVDFNVPTKGGKITNNQRIVAALPTIQYALEKGAKSVVAMSHLGRPDGKPNEKYSLKCVVPELEKLLGKSVTFLSDCVGPETEAACSDPEPGSVFLLENLRFHLEEEGKGTDDHGQKIKAKSDDVKRFRESLSKLGDVYVNDAFGTAHRAHSSMVGVQLPQKVAGFLLKKELTYFAKALERPEEPFLAILGGAKVADKIKLIENLLEKVNLMIIGGGMAFTFLKVINDMEIGDSLYDEDGAKIVNRLIEKSKQNNVEIVLPVDFVTGDKFAENATVGQATVEEGIPAGHMGLDVGEETNKKFSEVIATAKTIVWNGPPGVFEFPKFSKGSMSMMDAVVKATEDGATTIVGGGDTATCCAKFKTETKVSHVSTGGGASLE…	>tr|A0A6P7T0G1|A0A6P7T0G1_OCTVU Phosphoglycerate kinase OS=Octopus vulgaris OX=6645 GN=LOC115218470 PE=3 SV=1	0	10.094	0	13	4	5	0	4	415	44.5	5.68	9.58	13	5	4	0	0	Not Found	High	Not Found	Not Found	High	Not Found	Not Found	High	Not Found	1
High	Master Protein	-6938938801419273829	78	A0A6P7SWF0	probable methylmalonate-semialdehyde dehydrogenase [acylating], mitochondrial OS=Octopus vulgaris OX=6645 GN=LOC115217127 PE=3 SV=1	MFNSLNMASLLRLTLRHRGSFLGSVSQFHTQTCRYAAPTTKMFIDGEFVESKTNKWIDLHNPATNEVITRVPQSTQEEMNAAVESCKKAFSSWRNSTILTRQQCMFNLQQLIKDNMGKLAQNITEEQGKTLVDAEGDVLRGLQVVETCCSLSATCLGETLTGIAKDMDTMTIREPLGVCAGITPFNFPAMIPLWMFPIALTCGNTMLLKPSERDPGACMILMELAKQAGFPDGVVNVIHGQHDSVNFICDHPDIRAISFVGSDQAGNYIYDRGTKNGKRVQSNMGAKNHGVIMPDANKEMTLNQLVGAAFGAAGQRCMALTTAVFVGESKEWISELVEKAKKLKVNAGHEPGADLGPLISPESKNRVCDLIESGAKEGADVLLDGRNITVPGYEKGNFV…	>tr|A0A6P7SWF0|A0A6P7SWF0_OCTVU probable methylmalonate-semialdehyde dehydrogenase [acylating], mitochondrial OS=Octopus vulgaris OX=6645 GN=LOC115217127 PE=3 SV=1	0	9.985	0	8	3	3	0	3	534	58.2	6.39	8.22	8	3	3	0	0	Not Found	High	High	Not Found	High	High	Not Found	High	High	1
High	Master Protein	5252769198269461771	315	A0A6P7TFF7	uncharacterized protein LOC115223512 OS=Octopus vulgaris OX=6645 GN=LOC115223512 PE=4 SV=1	MEQFLGKWKEVKEGAESHRRFLEKIGVPEEIADKIIKYTAVYETVKDGDLIKMVSSYLEDPNLNKTYNFKLNETFTDTDNFGQKFTVFCEIKNGKWYDKCSGYYNDATIESVQEVVGDTLIVKTTCDGTSMVTKFKKQSE	>tr|A0A6P7TFF7|A0A6P7TFF7_OCTVU uncharacterized protein LOC115223512 OS=Octopus vulgaris OX=6645 GN=LOC115223512 PE=4 SV=1	0	9.759	0	28	3	5	3	3	140	16.1	5.24	13.47	28	5	3	0	0	Not Found	High	High	Not Found	High	High	Not Found	High	High	1
High	Master Protein	-1626026711786413195	210	A0A6P7SDM4	lysosomal aspartic protease isoform X2 OS=Octopus vulgaris OX=6645 GN=LOC115211653 PE=3 SV=1	MRSLLFLTICMAFATCHALHRIKLHKMTSVRHDLLSKGTSMEMLKYLNPLVSTRYGGPVPEPLSNYLDAQYYGVISIGSPPQSFKVVFDTGSSNLWVPSKKCKITDIACLLHNKYDNTKSSTYKPNGTDFAIHYGSGSLTGFLSTDTVKIGEIAVKDQTFAEATNQPGIVFVAAKFDGILGMGYDTISVDGVEPVFYSMVDQKVVDSPVFSFYLNRNPDAQEGGELILGGTDPKHYVGNMTYVPVTKKGYWQIKMDSITVKNSTFCKGGCAAIADTGTSLIAGPTAEVAELNKLIGTRPIPGGENLVDCGSIPSLPAITFTLGGKSFTLSGADYVLKVTQAGQTICLSGFMGIDIPPPAGPLWILGDVFIGKYYTTFDAKGDRVGFAPSK	>tr|A0A6P7SDM4|A0A6P7SDM4_OCTVU lysosomal aspartic protease isoform X2 OS=Octopus vulgaris OX=6645 GN=LOC115211653 PE=3 SV=1	0	9.519	0	8	2	2	0	2	390	41.9	7.65	6.93	8	2	2	0	0	Not Found	High	Not Found	Not Found	High	Not Found	Not Found	High	Not Found	1
High	Master Protein	-2777111506929421050	174	A0A6P7T444	transforming growth factor-beta-induced protein ig-h3-like OS=Octopus vulgaris OX=6645 GN=LOC115219504 PE=4 SV=1	MKALFLIVLCVVGASAYSKHNLTLVEVAKKYGFNTMLELGERAGIAHKLNESGEWTVFAPTERAFTDMGPFFLNMLRNNSAGLEAFLKYHVVQGKFMYEDLQKNDLELTSLSGVKIRVNVYRANQVVTIEGCELVNTNNIATNGIFHVINDVMLPPSDNLYNTILSTPRYSIMASLLKKSNVHKVLESGLYTVFVPNDDAFHRLPNATLQHIFNDVALIEVLMKYHIVHGVLWRAGMHTEYLPTLAEGKRLLIGESFFGFITVENGYILNRDIGATNGVIHEVSRMLKPNDVDITS	>tr|A0A6P7T444|A0A6P7T444_OCTVU transforming growth factor-beta-induced protein ig-h3-like OS=Octopus vulgaris OX=6645 GN=LOC115219504 PE=4 SV=1	0	9.323	0	14	3	4	2	3	296	33.1	6.92	10.8	14	4	3	0	0	Not Found	High	High	Not Found	High	High	Not Found	High	High	1
High	Master Protein	-8117452165499459799	46	A0A6P7TFF2	regucalcin OS=Octopus vulgaris OX=6645 GN=LOC115222191 PE=3 SV=1	MSVSVVLRNPCQKTGEGPHWEESTKSLLFVDIEPGGIHKWNSVDDTHTKFNTDGKVSLIVPSESGGYIVSKDTKLASFDWESQQVKPFVDVEPDKPKNRFNDGKCDSHGRLWAGTMEEFLGELKATEAGHLYRLDKDRSLHTIKDKINISNGLAWTSDDKTMFYTHSTPRKVFSYDYDISTGEMSREQVVVDFEGKELHEFGIPDGMAIDLNDKIWLACFASSQVFQIDPETGKILMSVKFPASQITSCCFGGPNYDELYVTSSATFFTEEQLQDKEKFAGSVFKVTGLGAKGKAAPNFHG	>tr|A0A6P7TFF2|A0A6P7TFF2_OCTVU regucalcin OS=Octopus vulgaris OX=6645 GN=LOC115222191 PE=3 SV=1	0	9.308	0	10	2	4	0	2	301	33.6	5.44	10.35	10	4	2	0	0	Not Found	High	High	Not Found	High	High	Not Found	High	High	1
High	Master Protein	740303299799289699	245	A0A6P7SA56	cathepsin B OS=Octopus vulgaris OX=6645 GN=LOC115210644 PE=3 SV=1	MEFRTQILVAMLLVTMVSGYTVVNMEKKTPLSPMVEKINSLQTTWKAQDNFGWADLKDIKRLMGVLPESKKHLPPLRPPVLEMGGPLPDSFDSRQQWPSCQTLKEVRDQGNCGSCWAAAAAEAMSDRICIHSGGQMNAHISIEDLMTCCQSCGMGCNGGYPAAAWDYFKATGIVTGGPYHSKMGCQPYQIPACDHHVPGKLHPCKGELPTPSCERKCEAGYNVTYDDDKHYGHTSYAVDNDEKNIRQEIMTNGPVEAAFSVYKDFLTYKSGVYQHEEGEFMGGHAVKILGWGVEESTPYWLVANSWNPDWGDKGFFKIKRGNNECGIEDQIVAGLPKLAQKKE	>tr|A0A6P7SA56|A0A6P7SA56_OCTVU cathepsin B OS=Octopus vulgaris OX=6645 GN=LOC115210644 PE=3 SV=1	0	9.298	0	9	2	5	0	2	343	38	6.32	7.47	9	5	2	0	0	Not Found	High	High	Not Found	High	High	Not Found	High	High	1
High	Master Protein	-604454592613423416	226	A0A6P7S5H1	Mannose-6-phosphate isomerase OS=Octopus vulgaris OX=6645 GN=LOC115209304 PE=3 SV=1	MADDPCVFPLKCAVQNYVWGKLGNQSEVARLSQSGNPDFKLQQDVPYAELWMGTHPNGPSKIYLEGMEEKDLGEWISEHPERLGKETNDYFKGELPFLFKVLSVRTSLSIQAHPNKIHAELLNRENPNLYKDANHKPELAIALTPFQGLCGFHVIQDVAKYLQDIQEFRTVVGTENAIKLITASRAIDMASHRSVMKNAFEAMMMRDKETLQKEVRKWVSKVMDMEEQGEDISQYNGEVLLKLHREFPGDVGCFAVYFLNHITLQPGQAMFLDANLPHAYLSGDCMECMACSDNVVRAGLTVKYVDVQTLCKMLDYTGRQPQKAIFAAIQDTEDPYAAIFKPPVNDFAVIRIMLPGDVAQYQLRPLQNASICIVISGKAEGTTRSLANPLKLQPGSVFF…	>tr|A0A6P7S5H1|A0A6P7S5H1_OCTVU Mannose-6-phosphate isomerase OS=Octopus vulgaris OX=6645 GN=LOC115209304 PE=3 SV=1	0	9.17	0	5	2	3	0	2	424	47.6	6.07	7.91	5	3	2	0	0	Not Found	High	Not Found	Not Found	High	Not Found	Not Found	High	Not Found	1
High	Master Protein	1847287120802792670	263	Cluster-58773.152550;orf1 len=191 frame:-3 start:909 end:337 gi	115390 sp|P14533.1|CABO_DORPE RecName: Full=Squidulin; AltName: Full=Optic lobe calcium-binding protein; AltName: Full=SCABP [Doryteuthis pealeii]>gi|102715|pir||A33353 calcium-binding protein - squid (Watasenia scintillans)	TNTTANTLLTKSSFTSVNVDTTSVKSLSAPKSTKGLTEMANQLKAKQLEEIKEAFQMFDIDHDGQITSNELKAVMKSLGQTPSEQDLEEMIREVDTDGNGTIEYPEFVEMMARQMGPPDAEREMKEAFKVFDKDGNGLITATELRQVMLSFSEEKLTEGELEDMMKEADMDGDGMVSYEEFVKMIKKQQK	>Cluster-58773.152550;orf1 len=191 frame:-3 start:909 end:337 gi|115390|sp|P14533.1|CABO_DORPE RecName: Full=Squidulin; AltName: Full=Optic lobe calcium-binding protein; AltName: Full=SCABP [Doryteuthis pealeii]>gi|102715|pir||A33353 calcium-binding protein - squid (Watasenia scintillans) >Cluster-58773.152808;orf1 len=191 frame:2 start:584 end:1156 gi|115390|sp|P14533.1|CABO_DORPE RecName: Full=…	0	9.151	0	17	2	3	1	2	190	21.3	4.59	11.59	17	3	2	0	0	Not Found	High	High	Not Found	High	High	Not Found	High	High	1
High	Master Protein	-3617561684406975007	163	A0A6P7TM22	Tetratricopeptide repeat protein 38 OS=Octopus vulgaris OX=6645 GN=LOC115223987 PE=3 SV=1	MYYQWRDKQAWKTFGIDISSPSDEACKLFDINVNQLVRFCNDEALGGLTTTTTKMFEADPDFIMGHVFQKGLAILSPNQNLLGNTSFQEEVKQLKELSKAATVTPWEALHVDAIECGAKGDLLGACKIWQDILVETPLDILALKLSQFANYYLGKTPQLLHPVGSVLCHWTPSVPNHGYVHSMMAFGLEENNMYEEAVKEADQSLAINKIDIWASHAKGHVWEMQGEFEKGIDYFDKTEKDWSSCDMLAYHVYWHWAVYHIEKGDYASAMEIYKRGIHPDVAGFIAIKDSASFLYRLGLEDIDCSKEWKAVFDVCRSHTEDHFFMFQDIHILMALLSADEMKIAQEFTHSMTSGSVPTSKYFLKILEEVGKAVCEALVAYKEGDYAEVVELLMPIQFQL…	>tr|A0A6P7TM22|A0A6P7TM22_OCTVU Tetratricopeptide repeat protein 38 OS=Octopus vulgaris OX=6645 GN=LOC115223987 PE=3 SV=1	0	9.045	0	13	4	4	0	4	462	52.5	5.83	8.81	13	4	4	0	0	Not Found	Not Found	High	Not Found	Not Found	High	Not Found	Not Found	High	1
High	Master Protein	-2250684277032886861	190	A0A6P7SDZ2	40S ribosomal protein S14 OS=Octopus vulgaris OX=6645 GN=LOC115211938 PE=3 SV=1	MAPRKGKTQQQQEQVSLGPQVLEGENVFGVAHIFASFNDTFVHVTDLSGKETIARVTGGMKVKADRDEASPYAAMLAAQEVAERCKTVGITALHIRLRATGGNKTKTPGPGAQSALRALARSGMKIGRIEDVTPIPSDSTRRKGGRRGRRL	>tr|A0A6P7SDZ2|A0A6P7SDZ2_OCTVU 40S ribosomal protein S14 OS=Octopus vulgaris OX=6645 GN=LOC115211938 PE=3 SV=1 >tr|A0A0L8G9P1|A0A0L8G9P1_OCTBM Uncharacterized protein OS=Octopus bimaculoides OX=37653 GN=OCBIM_22037676mg PE=3 SV=1	0	8.833	0	16	2	2	0	2	151	16.2	10.54	6.09	16	2	2	0	0	Not Found	High	Not Found	Not Found	High	Not Found	Not Found	High	Not Found	1
High	Master Protein	-5570184403368865440	115	Cluster-58773.108885;orf1 len=1084 frame:2 start:158 end:3409 gi	667467110 sp|B3EWZ9.1|HEPHL_ACRMI RecName: Full=Hephaestin-like protein; Flags: Precursor [Acropora millepora]	YLMASKLIKKKRNSLKVINKLLLSQSLQLSFFHNYSRNMSHSLWTSFFLCMLGIVSQVKTDIIHYYITAEEVIWDYAPSGNDLVTGEEDYKTFLESSPTRIGRKYKKAIYKQYTDFTFTREIPKHESLGLMGPILSGSVGQTLHVHFFNNASRPYSIHPHGLFYTKGNEGALYRDLSKASEKADDKVLPQTTFNYTWIIEPFDGPTEDDADCLPWMYHSHIEPVMDMNAGLMGMLILCKKDKTYNPENTQHLLMKVMDENLSWYLDDNIKMFLTEKVDPEDEDFQESNKMHSLNGLMYGNLKLKACVADKVTWYLMGMGNEVDIHTLNVNGHSFDYNHHRKDSINLYPAEFSVATMDINGEGSWLVKCHVHDHYVGGMETLMEVLYCNKSNDISTNSKI…	>Cluster-58773.108885;orf1 len=1084 frame:2 start:158 end:3409 gi|667467110|sp|B3EWZ9.1|HEPHL_ACRMI RecName: Full=Hephaestin-like protein; Flags: Precursor [Acropora millepora]	0	8.792	0	3	3	3	1	3	1083	123.5	6.15	7.57	3	3	3	0	0	Not Found	High	Not Found	Not Found	High	Not Found	Not Found	High	Not Found	1
High	Master Protein	5611579923892116053	324	Cluster-1359.1;orf1 len=291 frame:2 start:62 end:934 gi	428230094 gb|AFY98827.1| tropomyosin [Jasus lalandii]	KELKVKMDAIKKKMQAMKLEKDNAMDRADTCEQQARDANLRAEKAEEEVRALQKKMQQLENDLDTSTEQLLAANSKLEEKDKALQNAEAEVAGLNRRLQLVEEDLERSEERLLTASTKLAEASHAADESERMRKVLENRSLSDEERMDALENQLKEARFLAEEADRKYDEVARKLAMVEADLERAEERAETGESKIVELEEELRVVGNNLKSLEVSEEKANQREEAYKETIKTLTQRLKQAEARAEFAERSVQKLQKEVDRLEDELVHEKEKYKSISDELDTTFSELSGY	>Cluster-1359.1;orf1 len=291 frame:2 start:62 end:934 gi|428230094|gb|AFY98827.1| tropomyosin [Jasus lalandii]	0	8.787	0	14	4	4	1	4	290	33.4	4.86	10.84	14	4	4	0	0	Not Found	High	Not Found	Not Found	High	Not Found	Not Found	High	Not Found	1
High	Master Protein	3354326277119761027	289	A0A6P7SVJ8	Arginase OS=Octopus vulgaris OX=6645 GN=LOC115216860 PE=3 SV=1	MSFHFSQRTFCNHLLNNFINRRTFSSFSYVIKNVLNSQHRSCVNNLLRPTRQVVQVSTRRHIHLQKIGVVGVPLNKGQDKQGVELGPKALRDNGLITSLEDLGHRINDYGNIEFENIEEDDKQPLIKNGQFLSHASKKISNAVKKVIQDGEICVTLGGDHSLTTGALHGHVQVQPDLVIVWIDAHADINPPAASLTGHMHGMPLSFLIKELQPYMSEVGPFDWVEPCISAHDLVYIGLRDVDAVERWLIEKLGICTFSMQELDDLGIAAVLKTALSTVDPEGKRPIHVSFDIDSLDPSVAGSTGTPARGGLTYRESQYIAEVIAQTGRISALDIVEVNPLLGTQMEQEKTISVAKDFALTIFGKQRCGTLPPRFTFSGRPS	>tr|A0A6P7SVJ8|A0A6P7SVJ8_OCTVU Arginase OS=Octopus vulgaris OX=6645 GN=LOC115216860 PE=3 SV=1	0	8.704	0	9	2	2	0	2	381	42.1	6.8	6.9	9	2	2	0	0	Not Found	High	Not Found	Not Found	High	Not Found	Not Found	High	Not Found	1
High	Master Protein	-233580971103215175	231	A0A6P7SL43	Glucosamine-6-phosphate isomerase OS=Octopus vulgaris OX=6645 GN=LOC115214100 PE=3 SV=1	MRLVILDTSNDVSEWAAKYIRRKILEFKPSAERYFTLGLPTGSTPLGTYRRLIEFYKAGCISFKYVKTFNMDEYVNLPRDHPESYHSFMWNNFFKHIDIEPSNAHILDGNAPDLDTECREFEKKIAEAGGIQLFVGGIGPDGHIAFNEPGSSLVSRTRVKTLAQETILANARFFDGDIEKVPNMALTVGVGTVMDAKDVLILITGAHKALALHKSVEEGINHMWTVSAFQQHPSTTFVCDEDATLELKVKTVKYFKGLMQIHNKLVEDI	>tr|A0A6P7SL43|A0A6P7SL43_OCTVU Glucosamine-6-phosphate isomerase OS=Octopus vulgaris OX=6645 GN=LOC115214100 PE=3 SV=1	0	8.684	0	17	4	4	2	4	269	30.3	6.54	5.31	17	4	4	0	0	Not Found	High	High	Not Found	High	High	Not Found	High	High	1
High	Master Protein	-4724410533134100333	137	A0A7E6EXQ9	cytosolic non-specific dipeptidase isoform X2 OS=Octopus vulgaris OX=6645 GN=LOC115213823 PE=3 SV=1	MVEWTKAEMDKLNIQTELLELGDQVLPSSGVLKLPPVIFGQLGNDPKKKTLLAYGHVDVQPANKSDGWDTDPFLLTEIDGKLYGRGTSDDKGPVLGWLNAIEAYQNQKIDLPLNLKFVFEAMEESDSDGLANLLMSKKDSFLKDIDFICISDNNWLSKNRPCLTYGLRGVCHFFVEVECSSKDLHSGVFGGSVHEAMSDLIFLMNSLVDVKGRILIPGIYDSVEPITSEEDSLYKDIDFDLEDLRKDIGCEKLLHSSKVELLQHNWRHPCLSLHGIEGAFSEPGAKTVIPRKVTGKFSIRIVPNQDPDEVQRLTKSYLENCHKTRGSPNKLRVTTSGSPAWISDYKHENYTAAKKACKKVYGVEPDMTREGGSVPVVFYMEKATSTNVLLLPMGACDDD…	>tr|A0A7E6EXQ9|A0A7E6EXQ9_OCTVU cytosolic non-specific dipeptidase isoform X2 OS=Octopus vulgaris OX=6645 GN=LOC115213823 PE=3 SV=1	0	8.471	0	6	2	3	0	1	431	48	5.55	7.95	6	3	2	0	0	Not Found	Not Found	High	Not Found	Not Found	High	Not Found	Not Found	High	1
High	Master Protein	-4457853463433780815	146	A0A7E6EUU3	apoptosis-inducing factor 3 isoform X1 OS=Octopus vulgaris OX=6645 GN=LOC115213836 PE=4 SV=1	MLNLLSKDLLLQRSSLLYSSIRTIVQKSVYSRGKKNLFSFGLETTSGCLAQSSGQASISVNKYSTDKDAVTGLSYKPTEAVSEEPSLNPSPSELSEMEVVVGPVEDLQLGLVKEVAVGDQKVLVVKEKNGVFAFGSKCSHYGLPLANGAYCNGRIRCPFHGACFDVKTGDIEDFPGLDSLHTFKVTVENDIVKLTVPQDKLKEFRRVKPMVKYSSATNKVNLLVGGGPASLICAETLRQEGFTGKIILASKEECIPYDRPKLSKTMSASADSLALRSKDFLKEHDIEFLGEKQLVNIDSEKKKAIFKDGTEISYTNLLLATGGIPRSLEIPGNDLQNVCFLRTPSEANYIATESKGKNAVIIGSSFIGMEVAAAILEKAKSVTVISNANLPFKTVLGSH…	>tr|A0A7E6EUU3|A0A7E6EUU3_OCTVU apoptosis-inducing factor 3 isoform X1 OS=Octopus vulgaris OX=6645 GN=LOC115213836 PE=4 SV=1	0	8.344	0	4	2	2	0	2	617	67.1	7.58	6.3	4	2	2	0	0	Not Found	High	Not Found	Not Found	High	Not Found	Not Found	High	Not Found	1
High	Master Protein	-6032697884696420338	102	A0A7E6FHK3	thioredoxin isoform X2 OS=Octopus vulgaris OX=6645 GN=LOC115222284 PE=4 SV=1	MLIIDSVEKFDQTLKENKDKLIIIDFFATWCGPCKMIAPKLKEVAEKEGIQAMPTFKFYKGGEEVEEIKGASEPKIREALTKYSS	>tr|A0A7E6FHK3|A0A7E6FHK3_OCTVU thioredoxin isoform X2 OS=Octopus vulgaris OX=6645 GN=LOC115222284 PE=4 SV=1	0	8.334	0	28	2	3	0	2	85	9.7	5.55	9.57	28	3	2	0	0	Not Found	High	High	Not Found	High	High	Not Found	High	High	1
High	Master Protein	5398989335918702885	317	Cluster-58773.217011;orf1 len=333 frame:3 start:348 end:1346 gi	762104009 ref|XP_011434531.1| PREDICTED: prostaglandin reductase 1-like [Crassostrea gigas]>gi|405958743|gb|EKC24838.1| Prostaglandin reductase 1 [Crassostrea gigas]	LIMVLSKKFVLAKHFVGKPSSDDIKLVTEELPDEVNDGEVLCEAVWLTVDPYMRIYTASLSEGDVIIGEQVARVIASKNPKFPEGTHVIARLGWKSHALVKDVSVLRKVPDIEDLSLSLTLGSLGMPGLTAYFGFLEKCQPKSGETVLVNAAAGAVGSIVGQIAKIKGCKVVAFAGTEEKCSWLKNELGFDQVFNYKNIDLDKVLSSSVPDGIDCYFDNVGGDFSSVVLNHMNSYGRVCVCGCISEYNVPAEKALKGPYPFKRILIKELSVFGFIVRKYFDRADEGRKQLLEWIKSGKLIYKETITEGFENMPKAFLGLFEGSNIGKAIVKA	>Cluster-58773.217011;orf1 len=333 frame:3 start:348 end:1346 gi|762104009|ref|XP_011434531.1| PREDICTED: prostaglandin reductase 1-like [Crassostrea gigas]>gi|405958743|gb|EKC24838.1| Prostaglandin reductase 1 [Crassostrea gigas]	0	8.191	0	11	3	3	0	3	332	36.4	6.89	7.59	11	3	3	0	0	Not Found	High	Not Found	Not Found	High	Not Found	Not Found	High	Not Found	1
High	Master Protein	-6962007636239865127	77	A0A6P7TFQ1	Tetraspanin OS=Octopus vulgaris OX=6645 GN=LOC115222869 PE=3 SV=1	MVEAGMKCIKYLLFAFNFIFVIAAIALIAVGIVVQTNFSGYLNFFDAPVTSVAILLIVVGVIMFFIAAFGCCGAIKEHNVCTMVFAVLLALIFILQLAGGIAAFVMRSDLENTVTETMKKAEQNYLTSPGVKKTWDDVQTDFKCCGVDKSTEWQQVYTNTTLPDSCCESDKGCNESSKDKYQTGCADAFISWSKSNLAKIAAAGLALAFIQVIGIVFACCLAQAIRKEYECV	>tr|A0A6P7TFQ1|A0A6P7TFQ1_OCTVU Tetraspanin OS=Octopus vulgaris OX=6645 GN=LOC115222869 PE=3 SV=1	0	8.184	0	10	3	6	0	3	232	25.2	5.34	13.9	10	6	3	0	0	High	High	High	High	High	High	High	High	High	1
High	Master Protein	-1265440188746944884	216	A0A0L8G0I6	14_3_3 domain-containing protein OS=Octopus bimaculoides OX=37653 GN=OCBIM_22003454mg PE=3 SV=1	MTEQSGNSKEDLVAKAKLAEQAERYDDMAVTMKKVTENGVELNNEERNLLSVAYKNVVGARRSSWRVISSIESKAENCERKLAMAKHYREKVELELKAICTEVLDLLENYLISKASTTESKVFYLKMKGDYYRYLAEVAQGEDRKGVLGHSQCAYKDAFDIAKSQMQPTHPIRLGLALNFSVFYYEILNAPEKACCLAKQAFDEAIAELDQLNEESYKDSTLIMQLLRDNLTLWTSDTQCGDEEGGEGGDNN	>tr|A0A0L8G0I6|A0A0L8G0I6_OCTBM 14_3_3 domain-containing protein OS=Octopus bimaculoides OX=37653 GN=OCBIM_22003454mg PE=3 SV=1	0	8.179	0	11	2	2	0	2	252	28.4	5.03	7.22	11	2	2	0	0	Not Found	High	Not Found	Not Found	High	Not Found	Not Found	High	Not Found	1
High	Master Protein	-4208311149318734174	153	A0A0L8H0K9	Proteasome subunit alpha type OS=Octopus bimaculoides OX=37653 GN=OCBIM_22024847mg PE=3 SV=1	MFRNQYDNDVTVWSPQGRIHQIEYAMEAVKQGSATVGLKSKNHAVLVALKRAPSELSAHQKKIIPIDDHVGISIAGLTADARLISNFMRTECLNSRYAYDEPLPISRLVCMIGNKSQIPTQRYGRRPFGVGLLVAGYDGMGPHIYQTCPSANYYDCKCMAIGARSQSARTYLEKHLKDFSDCSVNELVRHGLRALRDTLPQDVELTNKNCSLSVVGEDTKFTIYDNEGVNEFLQLIERDERSRAPPAKSDETPMEQDTVPESSDGAADQQPAEEEPRPDVAMDPE	>tr|A0A0L8H0K9|A0A0L8H0K9_OCTBM Proteasome subunit alpha type OS=Octopus bimaculoides OX=37653 GN=OCBIM_22024847mg PE=3 SV=1	0	7.948	0	9	2	2	0	2	285	31.7	5.55	6.44	9	2	2	0	0	Not Found	High	Not Found	Not Found	High	Not Found	Not Found	High	Not Found	1
High	Master Protein	-8595388014736162450	31	A0A7E6FAL0	protein hu-li tai shao isoform X12 OS=Octopus vulgaris OX=6645 GN=LOC115218883 PE=3 SV=1	MPAMNEIDPDDPEYIRQKQRPAVVKEDVKQMEDRRRVSIVLNSEAFREELEQIVHEHMKAGHHPASLALQQITELLLPHSAYRSNSGFRASPVIPILDIRGMESLGYSRQEKILRCKLAACYRLIDFFGWSHGIYNHITARINQEQEHFLLNPFGLLFAEMTASSLVKVDMQGEIVDSGSTSLGINKAGFMLHSAIHQARPDIRCVIHLHTPHAVAVSAMKCGLLPLSQESLICGTISYHEYNGIIVDQEEREKLARSLGPANKVMFLRNHGIVACGESIEEAYHFAFNVMKACDTQIHALPAGLDNLVLVNEETQKKTFTIANQSGGGGVDTSGRKWKTGELEFEALMRMMDNCGFRTGYIYRNPLIRQEKDHANSDIEIPPTSSSFTYVYDGDVDRS…	>tr|A0A7E6FAL0|A0A7E6FAL0_OCTVU protein hu-li tai shao isoform X12 OS=Octopus vulgaris OX=6645 GN=LOC115218883 PE=3 SV=1	0	7.945	0	2	1	1	0	1	705	79.5	7.33	3.82	2	1	1	0	0	Not Found	High	Not Found	Not Found	High	Not Found	Not Found	High	Not Found	1
High	Master Protein	132105559410907446	236	A0A6P7SK96	troponin C isoform X2 OS=Octopus vulgaris OX=6645 GN=LOC115213894 PE=4 SV=1	MGVTDKQVNDAQQAFNLFDKKGDGAVPTKELNNVFKSLALHVADHKLQLWVDEMDEEATGFIYWDNFCILFKRKLQEDEDEREVREAFRVLDKNNQGVIDVEDLRWILKSLGDDLNDEEIQDMINETDTDGSGTVDYEEFSKLMME	>tr|A0A6P7SK96|A0A6P7SK96_OCTVU troponin C isoform X2 OS=Octopus vulgaris OX=6645 GN=LOC115213894 PE=4 SV=1	0	7.796	0	11	2	2	0	2	146	16.9	4.41	6.92	11	2	2	0	0	Not Found	High	Not Found	Not Found	High	Not Found	Not Found	High	Not Found	1
High	Master Protein	-4419862638851423683	147	A0A6P7U4P1	deoxynucleoside triphosphate triphosphohydrolase SAMHD1-like isoform X2 OS=Octopus vulgaris OX=6645 GN=LOC115231345 PE=4 SV=1	MANGNDTRPDQVFQDAIHGSMQFSPLCVKIINTVQFQRLRNIKQLGLCYYVYPSASHNRFEHCLGTCHLAGKMIRHLKQQDSGLEISDRDILCVEIAGLCHDLGHAPFSHAFQEIINEYRKENGGKKWEHEDVSCEMLEHLFEMNQHFEGELKPGEIGFIKDLITGKPEKSDKKKFFYQIVNNADYNIDVDKWDYLARDSHFLGIGTSFDHERMMKMSKVIGGEICYRDKTLKNFYDMFYSRYRLHNTAYQHKTVLLLNKLLGDVLKSAHKKLKIFDRVKKMEEFTYFTDSILEEILNSKGNQDLKDALKDIIKRSFKYKGTVTDKIKGTFTGTVTGIFELGDTEGNILYPIEGTGDDVAVLKKMKVTINDKTLDTPESKMQRDITEEQNAEIYAKILY…	>tr|A0A6P7U4P1|A0A6P7U4P1_OCTVU deoxynucleoside triphosphate triphosphohydrolase SAMHD1-like isoform X2 OS=Octopus vulgaris OX=6645 GN=LOC115231345 PE=4 SV=1	0	7.742	0	7	3	3	0	3	534	61.4	7.01	8.09	7	3	3	0	0	Not Found	High	High	Not Found	High	High	Not Found	High	High	1
High	Master Protein	-1942665613460984013	200	A0A6P7SAF9	Proteasome subunit alpha type OS=Octopus vulgaris OX=6645 GN=LOC115210708 PE=3 SV=1	MFLTRSEYDRGVNTFSPEGRLFQVEYAIEAIKLGSTAIGIQTNDGIVLAVEKRVTCPLIVASSIEKVLEVDSHIGCAMSGLVADSRTMIDRARVEAQNHWFTYNEKMSVESVTQAVSNLALAFGDDDADPGAMSRPFGVALLFAGIDEKGPQLFHMDPSGTFIQYDAKAIGSGSEGAQQALQDVYHKSMSLDEARKEALKILQQVMEEKLDPTNVEMATVTREKNFNMFSREDLEKIIEDIEKGRK	>tr|A0A6P7SAF9|A0A6P7SAF9_OCTVU Proteasome subunit alpha type OS=Octopus vulgaris OX=6645 GN=LOC115210708 PE=3 SV=1	0	7.579	0	15	3	4	0	3	246	27.2	4.92	10.79	15	4	3	0	0	Not Found	High	High	Not Found	High	High	Not Found	High	High	1
High	Master Protein	-7247381198401496868	71	A0A7E6ESL5	prominin-1-A isoform X4 OS=Octopus vulgaris OX=6645 GN=LOC115210705 PE=3 SV=1	MERKGIKSVAVPCSVLLLWILIAFSLVDHSFAQNSSQQHRNEEKSMEKGMSFLFIMTKQFLEVIQPHKIYEKYDVHRLASDNAYQNKELNDVKKIVLYFIGYSICVAIGILFIILIPLIGCCLCCCRCCNRCGGRHMKYDPKNARYKRRTYVTCLVILNTIILFAVVCTFITNELYKKSFIDNTGVVQDLSKTTNTLQSYVDQSIKDIKTITRTETKSLEKKILKEVDDAGNRTLELLDKSVNATSLLNKVEVFGEEIKDLRNSVSNLSHSLNNLTVLGQTLESNLTNIKQQIQLQNCTNCNEIKNYVKNTEVVANFSKLDSQKAMLTKLDKALNISHLAVEAREKFADISTNISSIMEKNKKNVQKRLTEVTDNVDSALKKLDKSKEDIPLDQLTNII…	>tr|A0A7E6ESL5|A0A7E6ESL5_OCTVU prominin-1-A isoform X4 OS=Octopus vulgaris OX=6645 GN=LOC115210705 PE=3 SV=1	0	7.523	0	4	3	3	0	3	890	101.2	7.83	2.59	4	3	3	0	0	High	Not Found	Not Found	High	Not Found	Not Found	High	Not Found	Not Found	1
High	Master Protein	8196105249469436780	358	A0A6P7TFA3	Polyol dehydrogenase OS=Octopus vulgaris OX=6645 GN=LOC115223465 PE=3 SV=1	MDENLSTVLHSKGDLRMECRPIPEPGIGEVQLSMQDVGICGSDVHYWTHGCIGDFILTSPMVLGHEASGVVTKLGEGVTNLSVGDRVAVEPGVPCRLCNYCKEGHYNLCRKMRFCATPPVHGTLARFYCHAADFCYKLPDNVSTEDGALLEPLSVGVHACRRAGVGINSTVLISGAGPIGLCCFLTAKAMGAAKVCMTDVDSQRLEFAKKVGADHVLSVRAGTSKELASQIENLLGKSPDISLECSGNPAGLKTSILATASGGCVVMVGMQPDEVTVPLLNAAVREVDIRGIFRYANCYPIALSMIASGQVNVKPLITHRYKLEESQKAFEHARTMKDGAVKIMIKCS	>tr|A0A6P7TFA3|A0A6P7TFA3_OCTVU Polyol dehydrogenase OS=Octopus vulgaris OX=6645 GN=LOC115223465 PE=3 SV=1	0	7.468	0	7	2	2	0	2	348	37.1	7.18	6.46	7	2	2	0	0	Not Found	High	Not Found	Not Found	High	Not Found	Not Found	High	Not Found	1
High	Master Protein	-2934310657419301939	171	A0A6P7U2G4	uncharacterized protein LOC115232424 OS=Octopus vulgaris OX=6645 GN=LOC115232424 PE=4 SV=1	MSKMGKCEKLEDLYERFWQWRLDDSPDFAAFCGKMEYNDRVDDLSVDAYKKQKPIIEGFLKEASAIDMSDLDHDSKINLRLLKEDLESTLKGLDFMGYYFPISFLENPHINFMFRIDWMQFKEEADYKKYVACMKSFVKQLGDIEAILLEGIEKKMICPIESVKEVPQQLEDLIKKIDSGTSVFLNPFKKTPTNEKLLGMVEETKTELSDILQNQLKPALQKLKEFLENVYLKHSRQEPGACYLPNGKEFYDACVRFHTSSNLSPEEIHKLGLSEVERIKSEIMKIYKAENLPLDMKECSQILKTRKEFFCQTKEELLEYVKKICEDEIMPLIPKYFKDLPDIEMIIKPTPEGMDSSPAAFYLAGTPDGSRMGTYMINTSKFDVSPKYEIPALCLHEGI…	>tr|A0A6P7U2G4|A0A6P7U2G4_OCTVU uncharacterized protein LOC115232424 OS=Octopus vulgaris OX=6645 GN=LOC115232424 PE=4 SV=1	0	7.461	0	4	2	4	0	2	581	67.4	5.62	8.38	4	4	2	0	0	Not Found	High	High	Not Found	High	High	Not Found	High	High	1
High	Master Protein	3165998547089734871	284	A0A6P7U2Q2	uncharacterized protein LOC115232460 OS=Octopus vulgaris OX=6645 GN=LOC115232460 PE=4 SV=1	MDNFFGTWKQEAKPENMKAVMDATVGVSDKEKDYMINMLSKFVIGRSGDQYSITHSCEDPQLTKTYIFDLDEPLESTDIFSRKFKSIFKLVNPNYLTETCTEWTDGVIELTYEITGDDTMTWKLNYKGHTSTTILKKVAS	>tr|A0A6P7U2Q2|A0A6P7U2Q2_OCTVU uncharacterized protein LOC115232460 OS=Octopus vulgaris OX=6645 GN=LOC115232460 PE=4 SV=1	0	7.428	0	10	2	2	2	2	140	16.1	5.05	4.93	10	2	2	0	0	Not Found	Not Found	High	Not Found	Not Found	High	Not Found	Not Found	High	1
High	Master Protein	-8621349736391459779	28	A0A7E6EHE9	prosaposin isoform X1 OS=Octopus vulgaris OX=6645 GN=LOC115209891 PE=4 SV=1	MSFNSLFLVWLGILGCAFGSTTRRPFALVGQNHCTWGPAYWCSHVAKAKECGAIEHCATVWGKLKFPEKAETCSVCESFIIGAEKLKENKIEMKKIGYYMDSMCSYFKGAEIQKTCQKNVVEFLPELFKLLEFGMNTKSICHTLDFCQEGRFALDLKAFNSKHGITTTVTTTTQVTNSTTESPDKKMCNDCKVFFTDVRQRMTSNAVVHNIENAFDKEVCPYLGPFEGICKEYVGDYVPLIMQQLSMYIAPEFLCSLLTFCPMSKEAAISQLMESIVHNNNLKDECKNCKMFLEKIKEDLTANTTTQELQNILKKEVCSHLGEYKEMCELVVENYAGLIVTDLVEKINSSVVCHDIGVCSTQILIQAVADHFSKMKFSTANPFQEATECEMCKVLLKEL…	>tr|A0A7E6EHE9|A0A7E6EHE9_OCTVU prosaposin isoform X1 OS=Octopus vulgaris OX=6645 GN=LOC115209891 PE=4 SV=1	0	7.418	0	6	4	8	0	4	821	91.8	6.01	9.83	6	8	4	0	0	High	High	High	High	High	High	High	High	High	1
High	Master Protein	-4702504756824572000	139	Cluster-58773.136028;orf1 len=262 frame:2 start:116 end:901 gi	291233326 ref|XP_002736601.1| PREDICTED: UPF0462 protein C4orf33 homolog [Saccoglossus kowalevskii]	RTCFSYSVKTSGHLQTPKPDLWPPKMKLFALALLFFVGATYSLPTKNSSTSQQRGQVNRPENHRLEFEITKQWDGTPLKKEDTVKLSIEGIDRWLRLEVEAPFYKDPAPPGGKYGEACPELYNYEVVEAFFLNDSNQYLEVELAPRGEHLLLMLNGRRNAVVQQLPMYNIAEIKDGFWRGIAYIDNEYLPQNITKFNAFAIHGTKDSRIYSALFPAPKGQFDFPDFHRLQFFQKVSFDHMPPFNKPAERNSTLWSMFTPRQ	>Cluster-58773.136028;orf1 len=262 frame:2 start:116 end:901 gi|291233326|ref|XP_002736601.1| PREDICTED: UPF0462 protein C4orf33 homolog [Saccoglossus kowalevskii]	0	7.245	0	12	3	3	0	3	261	30.2	8.34	7.56	12	3	3	0	0	Not Found	High	Not Found	Not Found	High	Not Found	Not Found	High	Not Found	1
High	Master Protein	-4475393226510384347	145	A0A7E6FG45	filamin-A isoform X3 OS=Octopus vulgaris OX=6645 GN=LOC115220426 PE=3 SV=1	MAKVVEEMSQDCRILDKKDGTICLEYHPTNVGRHEVLMNYEGNPCEGSPLQFLVDSHNGKYITAYGAGLYGGCSGKEASFMVVSHNERDLSVSIDGASKLDLKKEDLKDGAFRYSYMPMNPGAYDIAIKVNGKNIKGSPFSSKISGVGRKRSQIFLGNSSEYSLKVMEADMVNLHGNIKTPKGSVETCFLKKLADGSLGISSFTPKEPGQYVVNVMSGEKHINNSPFNIKIGNDEVGQPGKVKISGSTEKAIANSKNILTIDTRDAGYGGLSVAIDGPHRSEIVCTERKDNIYTIDYSPHEPGIYIINVRYSDENIAGSPFLVDVQGEPSGRLRETVEKEIVFPELVNVGDNVEFVVRYPGTNPFDMEAALTDPEGSCELCEVVDEDDYRYNVRFQPKM…	>tr|A0A7E6FG45|A0A7E6FG45_OCTVU filamin-A isoform X3 OS=Octopus vulgaris OX=6645 GN=LOC115220426 PE=3 SV=1	0	7.215	0	3	2	2	0	2	833	90	6.51	5.62	3	2	2	0	0	Not Found	High	Not Found	Not Found	High	Not Found	Not Found	High	Not Found	1
High	Master Protein	5463575936784698960	319	A0A812E3Y7	RAB11A OS=Sepia pharaonis OX=158019 GN=SPHA_67892 PE=4 SV=1	MTKDDEYDYLFKVVLIGDSGVGKSNLLSRFTRNEFNLESKSTIGVEFATRSIQVDGKTIKAQIWDTAGQERYRAITSAYYRGAVGALLVYDIAKHLTYENVERWLKELRDHADNNIVIMLVGNKSDLRHLRAVPTDEAKAFAEKHNLSFIETSALDSTNVEAAFQNILTEIYKIVSQKQIRESPDDDNSISTNVQTITVAPTDNSAGRVGLDVNGGLCRLSLSLSLSLSLSLSLSLSACWC	>tr|A0A812E3Y7|A0A812E3Y7_SEPPH RAB11A OS=Sepia pharaonis OX=158019 GN=SPHA_67892 PE=4 SV=1	0	7.007	0	12	3	3	0	3	241	26.7	5.68	7.65	12	3	3	0	0	Not Found	High	Not Found	Not Found	High	Not Found	Not Found	High	Not Found	1
High	Master Protein	-9036695204323303594	6	A0A6P7SDW4	tropomyosin Tod p 1.0102 OS=Octopus vulgaris OX=6645 GN=LOC115211717 PE=3 SV=1	MDRDTYLKKVQAIRVAKETAMDKVEVIEEKLKSTETERGRLDEELNWLQKKYSNMEKELDTVNNDLSKAQDMMHYAEERVSECDTEIQNLQRRIQMLELQLERSDEALSVKKTEEVTNQEKLKEAELRATNAERTVTKLEEDLEKMEVSLNEEKDKYNQLIKDLDDAYNDVALY	>tr|A0A6P7SDW4|A0A6P7SDW4_OCTVU tropomyosin Tod p 1.0102 OS=Octopus vulgaris OX=6645 GN=LOC115211717 PE=3 SV=1	0	6.988	0	14	2	2	0	2	174	20.6	4.73	5.9	14	2	2	0	0	Not Found	High	Not Found	Not Found	High	Not Found	Not Found	High	Not Found	1
High	Master Protein	-2117555514367008361	193	A0A6P7TEG5	Alpha-L-fucosidase OS=Octopus vulgaris OX=6645 GN=LOC115223232 PE=3 SV=1	MRISKTILALLLLAVLVSFQKGSHGSRQLRYSPNWTSLDTRPIPKWYDDAKIGIFLHWGVFSVPSYGSEWFWWNWQGKKIPAYIDFMNKNYRPDFTYADFAPRFTAEFFNPDVWANTFGASGAQYVVLTSKHHEGFTNWPSKYSWNWNSKDVGPKRDLVGELAAAIRKTPVHFGLYHSLFEWFHPLYLQDKANGFKTQNFVMKKTMPELYELVMNYKPDVIWSDGDWEAPDKYWNSTEFIAWLYNDSPVKDTVVVNDRWGIGISCHHGDFYTCQDRYNPGKLINHKWENAMTIDKYSWGYRRRARYSDYYTIEGLISLLVETISCGGNLLMNIGPTHDGRIDPLFEERLLQVGQWLKVNGEAIYGSKPWTHQNDTYTKKVWYTSKMENNTKVVYATTLL…	>tr|A0A6P7TEG5|A0A6P7TEG5_OCTVU Alpha-L-fucosidase OS=Octopus vulgaris OX=6645 GN=LOC115223232 PE=3 SV=1	0	6.952	0	7	3	4	1	3	465	54.2	8.57	10.36	7	4	3	0	0	Not Found	High	High	Not Found	High	High	Not Found	High	High	1
High	Master Protein	-1686141778225702862	206	A0A6P7TDL1	Proteasome subunit alpha type OS=Octopus vulgaris OX=6645 GN=LOC115222353 PE=3 SV=1	MSSIGTGYDLSASQFSPDGRVFQVEYAQKAVENSGTAIGIRGKDGVVFGVEKLVRSKLYEVGANKRIFNIDTHIGAAVAGLLADARHVIKTSREEAANYRYNYGESIPLKYLTNRVSMYVHAYTLYSSMRPFGVSMIMGSYEQGNPQLYMIDPSGVSWGYCGCAIGKARQTAKTEIEKLKTKDMPITEVVKEVAKIIHVVHDEIKDKAFELELSWVGEHTGGKHELVPTHILEEAETAAKNFLRVADDDGEE	>tr|A0A6P7TDL1|A0A6P7TDL1_OCTVU Proteasome subunit alpha type OS=Octopus vulgaris OX=6645 GN=LOC115222353 PE=3 SV=1	0	6.945	0	17	4	5	0	4	252	27.8	6.35	9.4	17	5	4	0	0	Not Found	High	High	Not Found	High	High	Not Found	High	High	1
High	Master Protein	1487571616464454640	255	A0A0L8HS39	Uncharacterized protein OS=Octopus bimaculoides OX=37653 GN=OCBIM_22007563mg PE=4 SV=1	MSQLTEERIGDLLDIFNLFDEKGDGKVSAYQLGEVLRAMGENPTQAEVKKCGYEGREMERISFETVLPILQTINRNKDPVTFEDLVEGFKVFDKDQNGFVSSAEMRHLLSGLGERLTSEEADQLLQGVEDSHGNVNYEELIRMVLAG	>tr|A0A0L8HS39|A0A0L8HS39_OCTBM Uncharacterized protein OS=Octopus bimaculoides OX=37653 GN=OCBIM_22007563mg PE=4 SV=1	0	6.917	0	18	1	1	0	1	147	16.5	4.55	5.14	18	1	1	0	0	Not Found	High	Not Found	Not Found	High	Not Found	Not Found	High	Not Found	1
High	Master Protein	978862955844799902	247	A0A6P7TQA6	Parkinson disease protein 7 homolog OS=Octopus vulgaris OX=6645 GN=LOC115224773 PE=4 SV=1	MPSALVILAEGAEEMEAVITIDVLRRGGVCVTVGGLSDSNPVKCSRDTVIVPDKSLQQAISDNKYDAVIIPGGLQGSKLISESSIVKNLLQEQEKRTGLIAAICAGPTALMAHKICMGKRLTSYPAFKDKLTAAGYNYSEDRVVVDGRLITSRGPGTAFEFALAIVKALDSQEKADSLVAPMLLKL	>tr|A0A6P7TQA6|A0A6P7TQA6_OCTVU Parkinson disease protein 7 homolog OS=Octopus vulgaris OX=6645 GN=LOC115224773 PE=4 SV=1	0	6.843	0	18	2	2	0	2	186	19.7	7.06	5.02	18	2	2	0	0	Not Found	High	Not Found	Not Found	High	Not Found	Not Found	High	Not Found	1
High	Master Protein	-1032733070300670337	219	A0A6P7SVY8	3-ketoacyl-CoA thiolase, mitochondrial isoform X2 OS=Octopus vulgaris OX=6645 GN=LOC115217007 PE=3 SV=1	MAVKDVFIIAAKRTAFGTFGGKLKMKTPTDLAEAAAKAALASANVTPEMINSVIIGNVIQSAADSIYIARHVGLRIGVPIPVPSYTVNRLCGSGFQAIVNASQEIMLGDSDIVLCGGADNMSMTPYSVRNARFGTTLGIDLKMEDTLMAGLTDLHVKLPMAITAENLAVKYGLSREEVDEFALRSQTRWRAAQDGGHFKAEIAPLTVKGKKGAETFEVDEHPRPTTKESLAKLPPVFKKNGVVTAGNASGICDGASCLILASENAVKKHNLTPLARVVSYGIAGCDPTIMGIGPAPAARAALKVAGKNMHDMDLIEVNEAFGAQYLAVEKELELDPARTNPNGGAIALGHPLAASGARITGHLVHEIKRTGGKLALGSACIGGGQGIAVITENL	>tr|A0A6P7SVY8|A0A6P7SVY8_OCTVU 3-ketoacyl-CoA thiolase, mitochondrial isoform X2 OS=Octopus vulgaris OX=6645 GN=LOC115217007 PE=3 SV=1	0	6.666	0	7	2	2	0	2	394	41.1	8.02	6.87	7	2	2	0	0	Not Found	High	Not Found	Not Found	High	Not Found	Not Found	High	Not Found	1
High	Master Protein	3311773975733455826	287	A0A6P7T033	T-complex protein 1 subunit gamma OS=Octopus vulgaris OX=6645 GN=LOC115218091 PE=3 SV=1	MFGGSSPIIVLNQNTKRESGRKVQFGNIKAGKSIADIIQTCLGPRSMLKMLMDPMGGIVMTNDGNAILREITVQHPAAKSIIEVARTQDEEVGDGTTSVIVLTGEVLNVASPFLGEQMHPTVIISAFRRALDDILEIMKAKIGVPVDVNNDGELLKIIKSCIGTKFMKQWSELACKMALTATKIVLVEEKGKKEIDLKNFAKVEKIPGGCIEDSCVLQGILLNKDVTHPKMKRKIENPRILLLDCSLEYKKGESQTNIEITAEDDFAKVLRLEEEYIQEICNDIIAVKPDLVITEKGVSDLAQHFLIKAGISCIRRVRKTDNNRIARASGATIVNRTEEIKEEDVGTACGLFEIKKIGDEYFTYLIDCKNPKACTIVLRGASKDILNEVDRNLQDALNV…	>tr|A0A6P7T033|A0A6P7T033_OCTVU T-complex protein 1 subunit gamma OS=Octopus vulgaris OX=6645 GN=LOC115218091 PE=3 SV=1	0	6.635	0	7	3	3	0	3	549	60.1	6.67	8	7	3	3	0	0	Not Found	High	Not Found	Not Found	High	Not Found	Not Found	High	Not Found	1
High	Master Protein	-2728156944797573346	177	A0A6P7S854	neuroglian isoform X1 OS=Octopus vulgaris OX=6645 GN=LOC115210201 PE=4 SV=1	MKIAVLLATSFIFLLTVHHVSAQWDASPTERESPFIEDTFPDKTFFVNQKLTEYWQINYPCEVSKGIPKPEIYWKWYSNGVYKGKIDSKSGDRVLNGTRLALKNINPDERYRCVAENIYGTALSKKIHILQSKTTKFNINEKVEDTITKNAGETLVIKCKFISPGQPVGLYYWKTKNRITETDRIYTNVEGSLVFSYVESDDTNTYTCNNMNPKQVATTGGGWTNLTVNPNTLPVEAPLQKLYTTENNSIAMFGREFLIQCMYGGIPIPRIRWETPLSMRPNNPEHTLVIKTVTENHGGCYTCKASSGNNRDETKICIHVAGPPIWVNEPDPEMTVAEESNVVFHCKARSLKGGKELARPIWMKNGRNLSDISVYPGGEMRNRLSLSLDGSSLTFSDVR…	>tr|A0A6P7S854|A0A6P7S854_OCTVU neuroglian isoform X1 OS=Octopus vulgaris OX=6645 GN=LOC115210201 PE=4 SV=1	0	6.572	0	2	1	1	0	1	666	74.6	6.57	3.26	2	1	1	0	0	Not Found	High	Not Found	Not Found	High	Not Found	Not Found	High	Not Found	1
High	Master Protein	8986321726140847737	373	A0A6P7SYF5	retinal dehydrogenase 2 OS=Octopus vulgaris OX=6645 GN=LOC115217865 PE=3 SV=1	MTTIQAPLPNRNPEIKYTQILINNEFVNSASGKTFLTLNPCHGETICEIQESDKADIDKAVAAAKAAFKRGSKWRCMNASERGLLINKLAHLIERDRIYLASLETLDNGKPFKSSLGDIEFGLSLLRYYAGWADKIEGKTIPVDGDFFCYTKHEPVGICGQIIPWNFPILMFLMKICPALTCGNVCVVKPAEQTPLTALYMGALLVEAGFPPGVVNILPGYGPTAGAAISTHPEINKVAFTGSTEVGQIVMQVAGASNLKRCSLELGGKSPCVIFADADLDSAVATAHEAAMICMGQCCFAGSRTFVQDSIYDEFVAKSVELAKKRYVGDPFDSQTINGPQIDAIQLSKIIDLVKSGESEGARMMCGGKQKGDKGYFMEPTVFADVKDNMRIAKEEIFG…	>tr|A0A6P7SYF5|A0A6P7SYF5_OCTVU retinal dehydrogenase 2 OS=Octopus vulgaris OX=6645 GN=LOC115217865 PE=3 SV=1	0	6.517	0	7	3	3	0	3	497	54.1	6.1	5.6	7	3	3	0	0	Not Found	High	Not Found	Not Found	High	Not Found	Not Found	High	Not Found	1
High	Master Protein	-7285386349054159180	68	A0A6P7SHI1	Malate dehydrogenase OS=Octopus vulgaris OX=6645 GN=LOC115212957 PE=3 SV=1	MSTLFHSRFLVTTVTACCRRTLSTTTTKNAKVCVLGAAGGIGQPLSLLLKNSPLVSHLALYDIAHTPGVAADLSHLETRAKVTGHMGPSELEEAVTGADVVLIPAGVPRKPGMTRDDLFNTNASIVGNLADACAQFCPKAMLAIVTNPVNSTVPIASEIYKKRGVYDPKRIFGVSTLDVVRANTFIAEARGLDVSKVSVPVIGGHSGVTIIPLISQCTPPVSFPLEERVRLSVRIQNAGTEVVEAKAGAGSATLSMAYAGARFAFSLLEALSGVEGIVECAYVKSDETEAKYFSTPILLGVNGVEKNLGIGKLIEYEVELIKAALPELKTNIQKGEDFVAKMMA	>tr|A0A6P7SHI1|A0A6P7SHI1_OCTVU Malate dehydrogenase OS=Octopus vulgaris OX=6645 GN=LOC115212957 PE=3 SV=1	0	6.485	0	6	2	4	0	2	344	36.3	7.68	10.41	6	4	2	0	0	Not Found	High	High	Not Found	High	High	Not Found	High	High	1
High	Master Protein	-2384389287978383639	185	A0A6P7T245	trans-1,2-dihydrobenzene-1,2-diol dehydrogenase isoform X1 OS=Octopus vulgaris OX=6645 GN=LOC115218668 PE=4 SV=1	MRWGICSPGLIANDFCNALQCLNPSEHTITAVVSKSLEKAKKFAEKFKIPNVYDSYEEFAKDPNIDLVYVSAINFYHHPLSILMLNNGKPVLCEQTCANNTQQTEEMIELAKSKKLFFMEGMWTKFFPVYKAIREIIDSGTIGKIRHLDATMFYKIMLSNGAVPEASLHRSGLIDIGVYLIWLANFIFKQKPETITATGVVTDIGVDQSANLILTYKDGAKASLSYDRTVTKKSDAYIYGTQGKIYIHSPFWSTTKIEINGEEREFPLHKSDAEYNYPNSAGLAYEAEAVRQCFEKGELECPAHTHSDTLSLITIIDEARRQLKENHQKKLGGTESQ	>tr|A0A6P7T245|A0A6P7T245_OCTVU trans-1,2-dihydrobenzene-1,2-diol dehydrogenase isoform X1 OS=Octopus vulgaris OX=6645 GN=LOC115218668 PE=4 SV=1	0	6.453	0	9	3	4	0	3	337	38	6.68	6.34	9	4	3	0	0	Not Found	High	High	Not Found	High	High	Not Found	High	High	1
High	Master Protein	1060292019167072647	249	A0A0L8GSZ5	Histone H4 OS=Octopus bimaculoides OX=37653 GN=OCBIM_22029078mg PE=3 SV=1	MSGRGKGGKVKGKSKTRSSRAGLQFPVGRIHRLLRKGNYAQRVGAGAPVYLAAVMEYLAAEVLELAGNAARDNKKSRIIPRHLQLAIRNDEELNKLLSGVTIAQGGVLPNIQAVLLPKKTQKASTNGRGKGGKGLGKGGAKRHRKVLRDNIQGITKPAIRRLARRGGVKRISGLIYEETRGVLKVFLENVIRDAVTYTEHAKRKTVTAMDVVYALKRQGRTLYGFGG	>tr|A0A0L8GSZ5|A0A0L8GSZ5_OCTBM Histone H4 OS=Octopus bimaculoides OX=37653 GN=OCBIM_22029078mg PE=3 SV=1	0	6.321	0	14	3	3	0	3	227	24.6	11.33	5.61	14	3	3	0	0	High	High	Not Found	High	High	Not Found	High	High	Not Found	1
High	Master Protein	-4584127724280247846	142	A0A6P7SU25	Glucose-6-phosphate isomerase OS=Octopus vulgaris OX=6645 GN=LOC115216343 PE=3 SV=1	MSCEPKNELTAESAWLDLKAYYDHHGSYLHMDEMFKNDPDRFKKYSVSLEDSNGNLLLDYSKNLINDTVIEKLIELAKQRKVDTMRDAMFNGEKINTTENRSVFHVALRNQSNQPMKVDGEDVMPGIQAVLKHMREFTDSVIQGRWKGYTGKAITDVVNIGIGGSDLGPLMVTESLKPFQVGPNVHFVSNIDGTHLAKTLKYLKAETTLFLIASKTFTTQETITNANSAKKWFLDNCKQPSCNILGRCLPVRLNTTNHVAKHFVALSTNKKLVTEFGIDEKNMFEFWDWVGGRYSVWSAIGLSVALFIGMDNFEMFLKGAHFMDQHFKQAPFEQNIPVILAMLGVWYSNFYQMESHCLLPYDQYMHRFPAYFQQGDMESNGKSVTRTGQRINYNTGPIV…	>tr|A0A6P7SU25|A0A6P7SU25_OCTVU Glucose-6-phosphate isomerase OS=Octopus vulgaris OX=6645 GN=LOC115216343 PE=3 SV=1	0	6.213	0	5	3	3	0	3	574	65.2	7.65	7.47	5	3	3	0	0	Not Found	High	Not Found	Not Found	High	Not Found	Not Found	High	Not Found	1
High	Master Protein	-5235242795492811003	125	A0A6P7TDN6	4a-hydroxytetrahydrobiopterin dehydratase OS=Octopus vulgaris OX=6645 GN=LOC115221645 PE=3 SV=1	MTNVFARQFIQACHYSRLALRHKFSPHLSRSIVRLSSPLLAKKMAAEKTSKLTSEERDDVLAPLMKEGWTIVKGRDAIYKEFVFKNFNQCFGFMTRIALMADKMDHHPEWFNVYNKVQIKLSTHEFNGLSHRDIRLATFIEKASKSVFD	>tr|A0A6P7TDN6|A0A6P7TDN6_OCTVU 4a-hydroxytetrahydrobiopterin dehydratase OS=Octopus vulgaris OX=6645 GN=LOC115221645 PE=3 SV=1	0	6.189	0	23	3	3	0	3	149	17.4	9.74	5.53	23	3	3	0	0	Not Found	High	Not Found	Not Found	High	Not Found	Not Found	High	Not Found	1
High	Master Protein	7045136952478080188	344	Cluster-58773.132040;orf1 len=167 frame:-2 start:502 end:2 gi	492370606 gb|AGL33705.1| cathepsin L2 [Sinonovacula constricta]	VPLSDNFLDQSWQTYMKLFNKNYETAENEFVRRVIWEKNLQYVNQHNLEADMGLHTYWLGLNEYADLENREFVKKMNNLIPRNLTTYKPKLIFANDNIKDLPDTVDWRTKGYVTEVKNQAQCGSCWAFSTTGSLEGQIFKKTGKLVSLSEQNLVDCSASYGNNGCEG	>Cluster-58773.132040;orf1 len=167 frame:-2 start:502 end:2 gi|492370606|gb|AGL33705.1| cathepsin L2 [Sinonovacula constricta]	0	6.172	0	12	2	2	1	1	167	19.3	5.6	5.66	12	2	2	0	0	Not Found	High	Not Found	Not Found	High	Not Found	Not Found	High	Not Found	1
High	Master Protein	8779920449250443350	369	A0A6P7SW31	Proteasome subunit alpha type OS=Octopus vulgaris OX=6645 GN=LOC115217043 PE=3 SV=1	MSRGSSAGFDRHITIFSPEGRLYQVEYAFKAINQGGLTSVAIKGKDSAVVVTQKKVPDKLLDPSTVTHIYQITDHIGCVMTGMTADSRSQVQRARYEAAKWMHTYGYEIPVDMLCKRLADISQVYTQSAEMRPLGCCIILIGIDDEKGPQVYKTDPAGYYSGYKATAAGVKQLEANNYLEKKVKKKQDFTKSEAVEVAISCLSTILSADFKPTEIEVGLVTVDNPKFRTLKESEIEAHLVAIAEKD	>tr|A0A6P7SW31|A0A6P7SW31_OCTVU Proteasome subunit alpha type OS=Octopus vulgaris OX=6645 GN=LOC115217043 PE=3 SV=1	0	6.167	0	14	3	3	0	3	246	27.2	7.37	5.91	14	3	3	0	0	Not Found	High	High	Not Found	High	High	Not Found	High	High	1
High	Master Protein	8514179370616167901	363	A0A0L8G5K6	Uncharacterized protein OS=Octopus bimaculoides OX=37653 GN=OCBIM_22000375mg PE=4 SV=1	MDLPRNSTALAEEHTKLFNTIVEVSTAALHEGRILLERVSRDDSGANGVRQKYAELQECCARVESNCKAQQAEAWEKNQAYLKFQEQYKNLHAWLTQIGLATLSRHKDLGSSLANAKDFLEIHQQLNEDVRGKATDMQALSDATDALVQSGDQEGKAAKEMYEALYQQWLKIQHIISLRIELSLIFVSFHKIIQNLAASSGIFENILKSETEDLQDITEDAVKNLQEMWSQTIKIHNDLQEKGSGFLQKTSQVTEDSNLDVAQSVTLVQKILTEYRSHITTLTEQWEIWQQRVSSSQQFKVQWHQFIQEVRKTITSITNIEKELFMPHISGQVSENKQTAEQLQKKLEDYEPILKEAEEKIKEHINTAETLSSKGDTKGQKDQIVNELVKVHQRFQARV…	>tr|A0A0L8G5K6|A0A0L8G5K6_OCTBM Uncharacterized protein OS=Octopus bimaculoides OX=37653 GN=OCBIM_22000375mg PE=4 SV=1	0	6.136	0	2	1	1	0	1	1001	114.9	5.73	4.15	2	1	1	0	0	Not Found	High	Not Found	Not Found	High	Not Found	Not Found	High	Not Found	1
High	Master Protein	-3025639799164995384	170	A0A0L8GWF6	Uncharacterized protein OS=Octopus bimaculoides OX=37653 GN=OCBIM_22027193mg PE=4 SV=1	MKLALVLLVLLPLALSASLGESESETAKRSLIDLVIHHLHSLDLSKGCVKACEENVAGIGEFFCEAACKILLQSTHSTASP	>tr|A0A0L8GWF6|A0A0L8GWF6_OCTBM Uncharacterized protein OS=Octopus bimaculoides OX=37653 GN=OCBIM_22027193mg PE=4 SV=1	0	6.094	0	23	1	2	1	1	81	8.6	6.1	4.69	23	2	1	0	0	Not Found	Not Found	High	Not Found	Not Found	High	Not Found	Not Found	High	1
High	Master Protein	2124925403652411692	269	A0A0L8HFB4	Pacifastin domain-containing protein OS=Octopus bimaculoides OX=37653 GN=OCBIM_22015839mg PE=4 SV=1	MIKLAILSCLVLAAFAADKCHHNGKTYNIGQMFKDDCNLCFCGANGAVSCTKKFCPPNHSGYSGEVCHHKGKVYKVGEAFKDDCNRCFCGSNNVIGCTKMLCPPHGQIEYSEQVCHLKGKVYKVGETFKDDCNRCFCGVNGIIACTRMLCPPHGHIDYSDSGVCNHNGQVYKVGDSFKDDCNSCFCGENGVVGCTKMACVHRGCLFKNKLYKTGETFTNDCNKCICGATGQAVCTMKGCIHE	>tr|A0A0L8HFB4|A0A0L8HFB4_OCTBM Pacifastin domain-containing protein OS=Octopus bimaculoides OX=37653 GN=OCBIM_22015839mg PE=4 SV=1	0	6.016	0	5	1	2	0	1	242	26.3	7.87	5.39	5	2	1	0	0	Not Found	Not Found	High	Not Found	Not Found	High	Not Found	Not Found	High	1
High	Master Protein	-5875571909516194505	105	A0A7E6FJ41	70 kDa neurofilament protein isoform X2 OS=Octopus vulgaris OX=6645 GN=LOC115222954 PE=3 SV=1	MSQVSTKTSKTTRRSRRGPRSSIRMGSQYGMSMATNVRAAPISLASGVAAQSSQRSVAEMKNSSQKEKKDLQGLNCKLAEFLEKTRMLEAENKHLKELLNRSQVEFNIDVIKISYQEQLEDLKGIIEDKDKELAAVKSKNESLEEEVEDLTEQLRQVQDERDRLQAEIDGLHDEVAQRIADSETSRRRTNEVEKQLADWKKRYGILEAQMAELRANLQSETTQRLELENRLAMLEEELAFLNDVHSAECKEYQAMLSKTQKVPDFQETWKAEIGGMVADLSAEYEAQLQEATRAMECRHAEQLQKLKAGARPESAARVSTENRRSRMEASDMSGQVGAYEGQISQLKSTIRGLEIELEEALNGRATDAANYNQEILSLRSELESMLKELQDLMDTKLSL…	>tr|A0A7E6FJ41|A0A7E6FJ41_OCTVU 70 kDa neurofilament protein isoform X2 OS=Octopus vulgaris OX=6645 GN=LOC115222954 PE=3 SV=1	0	5.904	0	3	1	1	0	1	563	62.6	5.5	4.1	3	1	1	0	0	Not Found	High	Not Found	Not Found	High	Not Found	Not Found	High	Not Found	1
High	Master Protein	-6912730744538154181	79	Cluster-58773.190283;orf1 len=447 frame:2 start:353 end:1693 gi	617418760 ref|XP_007557771.1| PREDICTED: deoxynucleoside triphosphate triphosphohydrolase SAMHD1-like [Poecilia formosa]	LDNLYFCSTFQNQHTQQQRDHHQQNQQQQQHKRKPHKKFCCFPNNLIMTQSENSSRMDQVFHDAIHGSMELPPLCVEIINTIQFQRLRNIKQLGLCYYVFPSASHNRFEHCLGTCYLAGKMVRHLKQQNPDLEISERDILCVEIAGLCHDLGHAPFSHVFEGFINENRRTDNKWKHEDASCKMLDHLFEENRLVREELETDEIAFIKDLIIGKSGNSAKPQFLYQIINNSSYNIDVDKWDYLARDSHFLGFGKSFDHERMMKMSKVIDGEICYRDKCLDNFYDMFYARYRLHKTAYQHKTVLLFNKLLGEALKSANEHMEIFEKVDDMKKFTYFTDSILEEILKNEDNESLKEAQNKLKDIIHRSYEYKGTCKVGKDQGKKEGMLFCEANLDYSAGKEN…	>Cluster-58773.190283;orf1 len=447 frame:2 start:353 end:1693 gi|617418760|ref|XP_007557771.1| PREDICTED: deoxynucleoside triphosphate triphosphohydrolase SAMHD1-like [Poecilia formosa]	0	5.838	0	8	3	3	1	2	446	52.7	7.52	8.29	8	3	3	0	0	Not Found	Not Found	High	Not Found	Not Found	High	Not Found	Not Found	High	1
High	Master Protein	1942469438753145395	265	A0A6P7SLL4	Glutathione S-transferase omega OS=Octopus vulgaris OX=6645 GN=LOC115214295 PE=3 SV=1	MSESTKLRFLSAWYCPFAQRLWIALLEKGIPFKYEETDLSNKTEEFLKLNPRGLVPVLVHDDKIIYESAVCVEYIDETWPQNPKIMMEQPYDKAQVRIWGDYATSKIIPLFYSILRSDPENLGETQKSFVENIGSFVKAMSPTGNFFMGDSFSFADIMVYPWMQRLEVLKHFKNFEIPSDIDWYPRFQKWLTACYERESVTPTIPDMKKLIPRHKRYVKTK	>tr|A0A6P7SLL4|A0A6P7SLL4_OCTVU Glutathione S-transferase omega OS=Octopus vulgaris OX=6645 GN=LOC115214295 PE=3 SV=1	0	5.818	0	14	3	3	0	3	221	26.1	7.33	6.79	14	3	3	0	0	Not Found	High	Not Found	Not Found	High	Not Found	Not Found	High	Not Found	1
High	Master Protein	-4177025578413776943	157	A0A6P7SRT8	ATP synthase subunit beta OS=Octopus vulgaris OX=6645 GN=LOC115215584 PE=3 SV=1	MMQAVRKACLGAFRAINPAFSFHNAYPTTLKASSAYFTTRKQYATAPAAKATTSMGRIVTVIGAVVDVQFDDELPPILNALEVQERKPRLILEVAQHLGENVVRTIAMDGTEGLVRGQNCLDTGNPIKIPVGPGTLGRIINVIGEPIDERGPIDTQHFSGIHQEAPEFVEMSVQQEILETGIKVVDLLAPYAKGGKIGLFGGAGVGKTVLIMELINNVAKAHGGYSVFAGVGERTREGNDLYHEMITSGVISLKDNTSKVSLVYGQMNEPPGARARVALTGLTVAEYFRDEEGQDVLLFIDNIFRFTQAGSEVSALLGRIPSAVGYQPTLATDMGSMQERITTTRKGSITSVQAIYVPADDLTDPAPATTFAHLDATTVLSRGIAELAIYPAVDPLDSS…	>tr|A0A6P7SRT8|A0A6P7SRT8_OCTVU ATP synthase subunit beta OS=Octopus vulgaris OX=6645 GN=LOC115215584 PE=3 SV=1	0	5.792	0	3	1	1	0	1	523	56.6	5.33	3.35	3	1	1	0	0	Not Found	High	Not Found	Not Found	High	Not Found	Not Found	High	Not Found	1
High	Master Protein	6440683175023831050	336	A0A6P7T526	probable phosphoglycerate mutase OS=Octopus vulgaris OX=6645 GN=LOC115219769 PE=3 SV=1	MAAYTIVFVRHGESEWNQKNLFCGWFDADLSETGVNEAKSAGKMLKEKGFTFDTAYTSVLKRAIKTLFLIQEELDLHWIPVTKHWRLNERHYGALQGLNKAETAKKYGEDQVKIWRRSYNIPPPSLEDGDPRCASNQPAYALLDKKLVPKRECLEDTVARALPFWHDVIVPALRTGKKPIVAAHGNSLRALVKYLDKMSEEDILGLNIPTGIPLVYELDKDMNPIKHYYVADEAAVKAAIDKVASQGKAK	>tr|A0A6P7T526|A0A6P7T526_OCTVU probable phosphoglycerate mutase OS=Octopus vulgaris OX=6645 GN=LOC115219769 PE=3 SV=1	0	5.607	0	8	2	2	0	2	250	28.2	8.44	6.16	8	2	2	0	0	Not Found	High	Not Found	Not Found	High	Not Found	Not Found	High	Not Found	1
High	Master Protein	-3038672137957971147	169	A0A812CP82	Aldehyde dehydrogenase (NAD(+)) OS=Sepia pharaonis OX=158019 GN=SPHA_37438 PE=3 SV=1	MFGMAAVTRVSGCLCTASSLLLRGRPSSPSLLKPAFIFYSSRLLSSRTMDNLLINDSKYAWLKELGLSSHNYGVYYGKNWCGSGELVTSYCPANNQPIAQVTQGNEADYEHAIAATKEAWNVWADIPAPQRGEIVRQIGEALRKKIELLGKLESLEMGKILPEGIGEVQEFVDIADYAVGLSRMFAGHVFPSERKGHVLLEQWNPLGTVGIITAFNFPVAVYGWNASIAMVTGNTILWKGAPSTPLTSIATTKIIQSVFEANNLPGAISSLVCGGADVGTLMAKDERINLMSFTGSTEVGKKVALMVHERFGKCLLELGGNNALIVNEDADLDMVVRSALFACAGTAGQRCTTTRRLILHEKVYDEVVQKLVKAYAQLPIGDPIEPGVLYGPMHSQQGV…	>tr|A0A812CP82|A0A812CP82_SEPPH Aldehyde dehydrogenase (NAD(+)) OS=Sepia pharaonis OX=158019 GN=SPHA_37438 PE=3 SV=1	0	5.606	0	6	3	3	1	1	560	60.6	7.39	5.59	6	3	3	0	0	Not Found	High	Not Found	Not Found	High	Not Found	Not Found	High	Not Found	1
High	Master Protein	2095631807685600504	268	A0A0L8HU60	Tetratricopeptide repeat protein 38 OS=Octopus bimaculoides OX=37653 GN=OCBIM_22006847mg PE=3 SV=1	MSTASDEACKMFDATLCQYVGWCEDDSVGGFEGSLEKMIAADENFVMGHVIKNGLDVLGTGTSSRFDKGLFDRMEHLKNMANKPTVTPWEKQHINAIYLWSKGNIAEACSVWESILGEKPKDILALKFAHDSYFFLGLRPQMRDSVARVLPYWDSSIPLYGYLHGMLAFGQEETNLFDQAEKSALKALGINKKDAWATHAMAHVNEMLGRQNQGSTFLETTEKDWSVCGMLACHNYWHWALYHIEKGQYEAALDIYDREVAVRAKNSGAMLDFVDKASLLYRLQLEGINVSERWSSCFEEFKDHATDHILSFNDAHSMMSCLGAGQEEFSDKLLESLQDFIEYGVGDNRSISEHVGYKLCKALKDYQEEEFAAVVDNLMPVRYDIYTIGGSNAQRDVFN…	>tr|A0A0L8HU60|A0A0L8HU60_OCTBM Tetratricopeptide repeat protein 38 OS=Octopus bimaculoides OX=37653 GN=OCBIM_22006847mg PE=3 SV=1	0	5.601	0	6	2	2	0	2	448	50.6	5.45	4.62	6	2	2	0	0	Not Found	Not Found	High	Not Found	Not Found	High	Not Found	Not Found	High	1
High	Master Protein	-7937805718622778133	51	A0A7E6EU42	rho GDP-dissociation inhibitor 1 isoform X1 OS=Octopus vulgaris OX=6645 GN=LOC115211966 PE=3 SV=1	MIACYQEKIFYCFWKPWMAETEESCVPKEGEKEEEEDEPALNYQPPAQKSINEIVSADQDDDSLVRYKQKLLGCAAGSANIIVDPDNPSKVILQKLIVKVDSRPDVVIPLTGDLSKLSKNPIVIKEGCKYCMEIHFYVQRDIVCGLNYTHCVYRKGVKVDSTKYMVGSYGPSNTILVSKVASEDAPTGLLSRGTYTVRSKFIDDDKIEYLKWEWAFEITKEWK	>tr|A0A7E6EU42|A0A7E6EU42_OCTVU rho GDP-dissociation inhibitor 1 isoform X1 OS=Octopus vulgaris OX=6645 GN=LOC115211966 PE=3 SV=1	0	5.521	0	8	1	1	0	1	223	25.4	5.27	3.75	8	1	1	0	0	Not Found	High	Not Found	Not Found	High	Not Found	Not Found	High	Not Found	1
High	Master Protein	144199125688159523	237	A0A7E6F650	Ribokinase OS=Octopus vulgaris OX=6645 GN=LOC115217290 PE=3 SV=1	MDVVVVGSFMTDFFCYCPEFPKPGETVHGSKFQQGFGGKGANQCVMASLLGAKTAMVGRVGTDQYGTNYLDLFHKYSINTDHVKVTEQSNTGIASITVNDKGQNNIVIVSGANEKLTGEDVEASMDVIGTSKVLLTQLETPTKTTLKALQMAKRQKVTTVLNPAPARPQLDPDFYKLADYFCPNETEGAGDAFIGSFAYYLSHHPHLDLREMIRRSSKIASVSVQKPGTQTSFPSREALSADLFA	>tr|A0A7E6F650|A0A7E6F650_OCTVU Ribokinase OS=Octopus vulgaris OX=6645 GN=LOC115217290 PE=3 SV=1	0	5.511	0	7	1	1	0	1	245	26.6	6.79	3.73	7	1	1	0	0	Not Found	Not Found	High	Not Found	Not Found	High	Not Found	Not Found	High	1
High	Master Protein	-1638070461961299372	209	Cluster-58773.130155;orf1 len=534 frame:1 start:1 end:1602 gi	871256270 ref|XP_012942267.1| PREDICTED: mucin-3A-like [Aplysia californica]	SFSSSSSSSSSSSSPSSLSSTPSLSPTPSLSSSSSPTLPPSSSPSSFSPITSSSISLSPSTPSTLSGSLPSSTSLTSSLSPSSASTLSPTIQPSTSSNGLGTTTSSSSSPNTTSITATPTIQNTSQGTTNVTQSFISTPIITSTLISANESTIETITTSTVGVSQSVNSNTTTNVTEPPAITKENTVPVITTKGPAVTTGAPVTMQPVISKFEFPFRMSFNTTFNTALLDRSSPLYRTVSDNITGELTKVYENTPGFISVLVTGFREGSTLVDYDLTVHGYVNQSSVIKFINSTGANNIRTLSTPLGTPSNVEEDMLNNIQQAQLRYTDPCLTKGACKPSYKCINNMCSLICTKNTCLNGGQCFTDSVASASICKCSENWKYYYSGSKCENENMSWKFI…	>Cluster-58773.130155;orf1 len=534 frame:1 start:1 end:1602 gi|871256270|ref|XP_012942267.1| PREDICTED: mucin-3A-like [Aplysia californica]	0	5.44	0	7	2	2	0	2	533	56.6	6.93	2.82	7	2	2	0	0	High	Not Found	Not Found	High	Not Found	Not Found	High	Not Found	Not Found	1
High	Master Protein	-6472154260157023013	93	A0A6P7TD81	dipeptidyl peptidase 2 isoform X1 OS=Octopus vulgaris OX=6645 GN=LOC115222860 PE=3 SV=1	MAFSWRITGLIWVSLLLILSNGPIGSSADGNNGHNVRQSVPFTEKYMEQYVDHINFVNNKTFFQRYLVQDKWWDRKNNGPIFFYTGNEGPIDQFWEITGLIFNLAPKFGALVVFGEHRYYGKSLPFGPDRSFKQPYISFLTVRQALADFAHLINTLKIMLSAQKSPVISFGGSYGGMLTAYLRMKYPGVCDGGIAASAPIYLFDPKFDHSFFFTDVSKDFSSCEPQVRQAFIKMNQLMAQGETGKKTLEEYFKLCKPISGPETYTRLLGAIRNAFTNMAMFDYPYATPMLPIGNPVNKSCQMMQEASDVLKGLVDVTMMFYNASSKPFQCFDVEKAFIPCADPTGCGVGPASVAWDFQLCGDLAPPTGTNNVTDMFPVLPFNDKIRDYYCQKVWNTVPT…	>tr|A0A6P7TD81|A0A6P7TD81_OCTVU dipeptidyl peptidase 2 isoform X1 OS=Octopus vulgaris OX=6645 GN=LOC115222860 PE=3 SV=1	0	5.27	0	6	2	2	0	2	485	54.5	7.84	6.16	6	2	2	0	0	Not Found	High	High	Not Found	High	High	Not Found	High	High	1
High	Master Protein	716589638858207588	244	A0A6P7SCL7	cylicin-1 OS=Octopus vulgaris OX=6645 GN=LOC115211645 PE=4 SV=1	MPDTKTNDQETEVETPVVKKVDDKKPEVESEKNAEDGKTGDKKDGKDDSDKVNSSEQPDDSESNDKSESGAEDCNDNKEETNNKENDEKENEDDVISPRKRAPDDFIRDDVSPSKKSKTETEEKEAVAPES	>tr|A0A6P7SCL7|A0A6P7SCL7_OCTVU cylicin-1 OS=Octopus vulgaris OX=6645 GN=LOC115211645 PE=4 SV=1	0	5.25	0	21	2	2	0	2	131	14.6	4.45	6.22	21	2	2	0	0	Not Found	High	Not Found	Not Found	High	Not Found	Not Found	High	Not Found	1
High	Master Protein	-5742312501419350020	110	A0A6P7TUU5	sodium/calcium exchanger regulatory protein 1 OS=Octopus vulgaris OX=6645 GN=LOC115226228 PE=3 SV=1	MASKLCGKWQIISSENFDEYMKAVGVTAENRALANDKFSGSSKLCQLITNDGDSWTIKTITSVGEREVAFKIGEDFDSQTIDGRAVKVSMKMDGDTLVETQVGNGVESINNRSVEGANMIMTMSACGVTCTRKYEKV	>tr|A0A6P7TUU5|A0A6P7TUU5_OCTVU sodium/calcium exchanger regulatory protein 1 OS=Octopus vulgaris OX=6645 GN=LOC115226228 PE=3 SV=1	0	5.229	0	9	1	1	0	1	137	14.9	5.14	3.94	9	1	1	0	0	Not Found	High	Not Found	Not Found	High	Not Found	Not Found	High	Not Found	1
High	Master Protein	2298495103107719570	271	Cluster-58773.109972;orf1 len=856 frame:2 start:89 end:2656 gi	762142591 ref|XP_011454520.1| PREDICTED: inter-alpha-trypsin inhibitor heavy chain H3-like [Crassostrea gigas]	NRNNQKTEAVKRIANNMAPRLLFVMLGAVFYLGMTANGEPRQKASLKSVHIISDIKYRFATTLVSMKYYNPYNSSVSADLNVLMPRNSFISNFSMEIDGNVTVGEVKKKSEAKRIFDYAIETGQSAGHVAVEHRFTNVFDISVNVEPQKYVVYNLTYQELLTRENNKYRHVIHLTNGGIVDDFLVEVFIREPQDIINVFVPEITDDKLTDIAIDKDLDSASIEYISSREVYVKYNPSRKQQEEISEKTGVAGLLRVEYDVDRQNNSNLIYAVDGYFVHFFTSDSIARLPKHIIFMLDVSGSMSGRKIEQLRKAMESIIDQLDPELDKFLIGKFSSDVSWMMDEFLIANDSNKILGKNYTKKLVASGATNINAALLQSIDKHKPALTPTKKSIIIFLTDG…	>Cluster-58773.109972;orf1 len=856 frame:2 start:89 end:2656 gi|762142591|ref|XP_011454520.1| PREDICTED: inter-alpha-trypsin inhibitor heavy chain H3-like [Crassostrea gigas]	0	5.166	0	3	3	4	0	3	855	97.2	9.16	6.88	3	4	3	0	0	Not Found	High	High	Not Found	High	High	Not Found	High	High	1
High	Master Protein	-8418209715102296920	34	A0A0L8H1Z7	CN hydrolase domain-containing protein OS=Octopus bimaculoides OX=37653 GN=OCBIM_22024094mg PE=4 SV=1	MAGKYESIESILKKHLPPDELREVWRVLYGKELRKLAIPVEAEEFAKEKNFEIKGYVFDAKVEDIRPQRLVRIGAIQNQIIESTSASITAQRDAIHKRICNIIKAASLCGVNILCLQEAWYMPFAFCTREKYPWSEFAENATTGPTTKLLQQMAKMFNMVIISPILERDEVHGDILANTCVIISNSGNIIGITRKNHIPRVGDFNESTYYMEGNTGHRVFETKWGKIAVNICYGRHHPQNWMMYGVNGAEIVFNPSATVGSLSEPLWSIEARNAAIANSYFTCAINRVGTETFPNEFTSGDHKPAHKDFGHFYGSSYIAAPDGSRTPGLSRNRDGLLISEVDLNLCRQVKDIWGFRMTQRLDLYAESLTAAIKDDYVPPVLKE	>tr|A0A0L8H1Z7|A0A0L8H1Z7_OCTBM CN hydrolase domain-containing protein OS=Octopus bimaculoides OX=37653 GN=OCBIM_22024094mg PE=4 SV=1	0	5.121	0	10	2	2	0	2	383	43.2	7.24	5.24	10	2	2	0	0	Not Found	Not Found	High	Not Found	Not Found	High	Not Found	Not Found	High	1
High	Master Protein	2402138416741866658	273	Cluster-58773.156686;orf1 len=474 frame:3 start:477 end:1898 gi	762073747 ref|XP_011435353.1| PREDICTED: serine hydroxymethyltransferase, cytosolic-like [Crassostrea gigas]>gi|405966819|gb|EKC32056.1| Serine hydroxymethyltransferase, cytosolic [Crassostrea gigas]	INMSTTNGYEGWCLQDDISQNDPQMYEFIKQEKLRQKQGLEMIASENFTSKAVLQALGSCLTNKYSEGYPGQRYYGGNEIIDQVESLCQKRALEVFKLNPEEWGVNVQPLSGCPANFAVYTGVVGPHGRIMGLHLPDGGHLSHGFMTNKRKVSATSVFFESFPYKVNPVSGLIDYDALETNAHLFNPSLIVAGVSCYSRHLDYARFRKISNSVDCLLMADMAHISGLVAAGVVPSPFEHCDIVTTTTHKSLRGPRSGMIFYRKGVRKVLKNGNKVMYDLEKKINEAIFPGLQGGPHNHQIGALAVALKQAKTEEFVEYQKQVLRNAHVMAEEFIARGYTLSTGGTENHLVLLDLRPNQLDGASVERILEEINIAVNKNTCPGDKSALKPSGIRIGAPAL…	>Cluster-58773.156686;orf1 len=474 frame:3 start:477 end:1898 gi|762073747|ref|XP_011435353.1| PREDICTED: serine hydroxymethyltransferase, cytosolic-like [Crassostrea gigas]>gi|405966819|gb|EKC32056.1| Serine hydroxymethyltransferase, cytosolic [Crassostrea gigas]	0	5.092	0	4	2	2	1	2	473	52.6	7.71	4.45	4	2	2	0	0	Not Found	High	Not Found	Not Found	High	Not Found	Not Found	High	Not Found	1
High	Master Protein	-6581500463386710884	91	A0A7E6FKU8	1,2-dihydroxy-3-keto-5-methylthiopentene dioxygenase OS=Octopus vulgaris OX=6645 GN=LOC115223255 PE=3 SV=1	MVQAWYMEDVSGGEEQYLPQKLEPNQDVSLAQLDELGVKYYEIDVDSYNGEFEPLKKEFGYTYDDTVDIHPSRFPNFDNMMKTFFSEHLHTDDEIRLILNGSGYFDVRDKNDKWIRIYSEKKDLIVLPAGMYHRFTLDSKVSCNYIIIILHFSEAMSPSG	>tr|A0A7E6FKU8|A0A7E6FKU8_OCTVU 1,2-dihydroxy-3-keto-5-methylthiopentene dioxygenase OS=Octopus vulgaris OX=6645 GN=LOC115223255 PE=3 SV=1	0	4.989	0	11	1	1	0	1	160	18.7	4.74	3.46	11	1	1	0	0	Not Found	High	Not Found	Not Found	High	Not Found	Not Found	High	Not Found	1
High	Master Protein	-5241731203577950714	123	A0A812CG60	ARF1_2 OS=Sepia pharaonis OX=158019 GN=SPHA_38611 PE=3 SV=1	MNIEWLTRVGSKSTNQKTRRRGLDVAYATPSSLLVRALTFGRLRCCCTHPPDHAITNAYKKNSTWGTYLRSFLGTTILYKLKLGEIVTTIPTIGFNVETVEYKNISFTVWDVGGQDKIRPLWRHYFQNTQGLIFVVDSNDRERIGEARDELSRMLGEDELRDAVLLVFANKQDLPNAMNAAEVTDKLGLHSLRNRTWYIQATCATSGDGLYEGLDWLSNQLKNSK	>tr|A0A812CG60|A0A812CG60_SEPPH ARF1_2 OS=Sepia pharaonis OX=158019 GN=SPHA_38611 PE=3 SV=1	0	4.949	0	13	2	2	0	2	225	25.6	8.85	4.76	13	2	2	0	0	Not Found	High	Not Found	Not Found	High	Not Found	Not Found	High	Not Found	1
High	Master Protein	-4418036877455196055	148	A0A6P7TV81	Proteasome subunit beta OS=Octopus vulgaris OX=6645 GN=LOC115225870 PE=3 SV=1	MEDYRKPVEAHFSPYAMNGGTVLGLSGADYAIIASDTRLSEGFTIHTRNSPKSYKVTDSTVLGCVGFHGDVLTLTKIIEARLKIYEHDHHKVMSCNAVAAMLSTILYYRRFFPYYTYNLIAGIDEDGKGAVYSFDPVGSYQREQCRAAGSASSMLQPILDNQIECKNQTNVEKKELSKEKAIELVKDVFISAAERDIYTGDAVLMNIITKDGITIEQFPLRRD	>tr|A0A6P7TV81|A0A6P7TV81_OCTVU Proteasome subunit beta OS=Octopus vulgaris OX=6645 GN=LOC115225870 PE=3 SV=1	0	4.938	0	9	2	2	0	2	223	24.9	6.3	2.63	9	2	2	0	0	Not Found	High	High	Not Found	High	High	Not Found	High	High	1
High	Master Protein	-5804662902246158064	108	A0A812DGV9	AIFM3 OS=Sepia pharaonis OX=158019 GN=SPHA_53448 PE=4 SV=1	MGLNTSKPTKGQVNLQAPQNSELDDGPVTGLTYKVKDQSVSGRMPSTNTIPSADESDEVEIVVGNVNDLERGKIKEIEIGNEKALIVKDDGIFAFGSKCTHYGLPLSKGAYCNGRIRCPFHGACFNVKTGDIEDFPGLDSIHTFKVEVENDIVKVIASKKKLTQFRRVKEMANCNSEAQQTFLLIGGGPASLSCAETLRQEDFDGKIIIVTKEDYLPYDRPKLSKAMSSNADSIALRKKEFFTEHCIELQTGKELISLDTDKNSAEFKDGSIIEYNALMIATGGNPRELELPGSDLKNICYLRTPDDANFIDKASDDKNVVIIGSSFIGMEVAAAVIGKASSVNVVCRSDLPFKNVFGTQIAERIMELYKEKGVNFYYNCHATELLGSDGNLTTVVLNN…	>tr|A0A812DGV9|A0A812DGV9_SEPPH AIFM3 OS=Sepia pharaonis OX=158019 GN=SPHA_53448 PE=4 SV=1	0	4.936	0	3	1	1	0	1	578	63.4	5.63	3.57	3	1	1	0	0	Not Found	High	Not Found	Not Found	High	Not Found	Not Found	High	Not Found	1
High	Master Protein	8209235936195944796	359	A0A6P7SVS2	UV excision repair protein RAD23 OS=Octopus vulgaris OX=6645 GN=LOC115216665 PE=3 SV=1	MLITLRTLQQHMFKVEIDVNSTVKQLKKKVEEDKGKDYPAAAQKLIYSGKILEDEKKIVDYDIEESKFVVLMVTKSKPQLAKVSEGSTSQGETASAASSEKSVPATTQGASATPTSDSGSSQSSKGSQGSEADKSTADANPESQATEITSDSDDISTLATETATALAAAIDEPLSVLQSAESALVTGQDYENMVLEIMKLGFDREQVERALRVNFNNPDRAVEYLYNGGSAQDVEPGIMEEALSGSETSVTSSSAPLQSATTPSSSDNPLDFLRNQLQFQQMRRVIQRNPHVLPAILQQIGTTNPPLLQLISQNQERFVQMINEPVDEGGQPGNVQASQASGQVATGFGSNVGSGGGTGVGTGVGSGGGGGGGGGGGGGGGGGGGGGGSNTAGGQGLQI…	>tr|A0A6P7SVS2|A0A6P7SVS2_OCTVU UV excision repair protein RAD23 OS=Octopus vulgaris OX=6645 GN=LOC115216665 PE=3 SV=1	0	4.913	0	4	1	1	0	1	458	47.5	4.54	3.25	4	1	1	0	0	Not Found	High	Not Found	Not Found	High	Not Found	Not Found	High	Not Found	1
High	Master Protein	-6862255721923275370	80	A0A7E6FR50	NADH-cytochrome b5 reductase OS=Octopus vulgaris OX=6645 GN=LOC115224390 PE=3 SV=1	MTAILAKHLFSGSKKAKVTLENKDVKYALRLVDREEISHDTRRFRFALTSPEHILGLPVGQHIYLSATINGELVVRPYTPVSSDDDKGYMDLVIKVYKKGIHPKFPNGGKMSQHVDSLTNEDYIDVKGPSGLLTYHGNGEFHIKPDKKSPHEVVTVKKIGMIAGGTGITPMLQIIKQILKESRHNLEMFLLFANQTENDILLRPDLEKIAEDHPDQFHLWFTVDKAEPNWSFSTGFVNETMIKDHLPAPAEDVLILMCGPPPMINSACLPHLDKLGYKPTQRFSF	>tr|A0A7E6FR50|A0A7E6FR50_OCTVU NADH-cytochrome b5 reductase OS=Octopus vulgaris OX=6645 GN=LOC115224390 PE=3 SV=1	0	4.809	0	5	2	2	0	2	285	32.1	7.44	4.95	5	2	2	0	0	Not Found	High	Not Found	Not Found	High	Not Found	Not Found	High	Not Found	1
High	Master Protein	-9062122872544985366	4	Cluster-58773.105280;orf1 len=426 frame:1 start:307 end:1584 gi	827883539 dbj|BAR90777.1| beta arrestin [Idiosepius paradoxus]	MATVDTADDSQKRQGTRVFKKSSPNGQITAYLGKRDFIDHLSHIDPVDGVILVEPDYLKDRKVYAHILAAFRYGREDLDVLGLTFRKDLFLSSVQVYPPPKDQERPLTRLQGRLIKKLGPNAYPFYFELPPNAPASVTLQPAPGDTGKPCGVDYELKTYVADHVDEKPHKRNSLRLAIRKLTYAPEEPAPQPSAENTKEFMMSPGNMKLEASLDKEKYYHGESLCINVLVDNNTNKSVKKIKISVRQVADICLFSTAQYKCTVAELESEEGFPIQPSQTGFCKVYHLTPLLDNNRDKRGLALDGKLKHEDTCLASSTILVESNPKENLGIVVSYKVKVKLILGFASSDLSVELPFTLTHPKPQDTPPSSRPASVAQENPDAPIDTNLIQLDTNGENLMT…	>Cluster-58773.105280;orf1 len=426 frame:1 start:307 end:1584 gi|827883539|dbj|BAR90777.1| beta arrestin [Idiosepius paradoxus] >Cluster-58773.105276;orf1 len=426 frame:1 start:307 end:1584 gi|827883539|dbj|BAR90777.1| beta arrestin [Idiosepius paradoxus] >tr|A0A6P7SCX4|A0A6P7SCX4_OCTVU beta-arrestin-1 OS=Octopus vulgaris OX=6645 GN=LOC115211741 PE=3 SV=1	0	4.645	0	3	1	1	0	1	425	47.5	6.14	3.36	3	1	1	0	0	Not Found	High	Not Found	Not Found	High	Not Found	Not Found	High	Not Found	1
High	Master Protein	-1542118240715785393	213	Cluster-58773.201330;orf1 len=134 frame:-1 start:402 end:1 gi	540357470 gb|AGV08297.1| 17beta-HSD14 [Azumapecten farreri]	AISAVDMAPSHRYQDKVVIVTGGARGIGKGCVETFVKEGAKVAICDILDDVAKATVEEINKMGPGEAYYINCNLRDEAQIKNMIEKVVEKYGTIDCLINNAGYHPGHYPIDTVTSESFASLMQLNVAAVFLTCK	>Cluster-58773.201330;orf1 len=134 frame:-1 start:402 end:1 gi|540357470|gb|AGV08297.1| 17beta-HSD14 [Azumapecten farreri]	0	4.538	0	16	2	2	0	2	134	14.5	5.49	4.07	16	2	2	0	0	Not Found	Not Found	High	Not Found	Not Found	High	Not Found	Not Found	High	1
High	Master Protein	6311864699418030945	334	A0A0L8H4W4	Proteasome subunit alpha type OS=Octopus bimaculoides OX=37653 GN=OCBIM_22022293mg PE=3 SV=1	MTSRYDRAITVFSPDGHLFQVDYAHEAVKKGSTAVGVTGKNIVVLGVEKKAVAKLQEERTLRKIALLDEHVAMAFAGLTADARILINRARVECQSHRLTVEDPVTVEYITRFIAQLKQKYTQSNGRRPFGLSALIVGFDYDGTPRLYQTDPSGTYHEWKANAIGRSAKTVREYLKKGYTDELAEKDEECIKLALRALLEVVQSGGKNVELAVMRRDSLLMMMESSEIERYIAEIEKEKEEEAEKKKQKK	>tr|A0A0L8H4W4|A0A0L8H4W4_OCTBM Proteasome subunit alpha type OS=Octopus bimaculoides OX=37653 GN=OCBIM_22022293mg PE=3 SV=1 >tr|A0A6P7SSE0|A0A6P7SSE0_OCTVU Proteasome subunit alpha type OS=Octopus vulgaris OX=6645 GN=LOC115216099 PE=3 SV=1	0	4.523	0	6	1	1	0	1	249	28.2	8.57	3.9	6	1	1	0	0	Not Found	High	Not Found	Not Found	High	Not Found	Not Found	High	Not Found	1
High	Master Protein	7856932174175427815	350	A0A6P7T4Z8	opine dehydrogenase OS=Octopus vulgaris OX=6645 GN=LOC115219799 PE=4 SV=1	MAQPDVQVNLLICGGGNGAHVLTGLASSRRNVKVNVMSLFADEAERFRNTLGNDQFTVEFKEKDGTTNIIKSRPNMITNDPSKAVPGCNLIIFTVPAFAHEGYFKAIAPYIEPNTVVVGLPSQPGFQFQCCDLLGIGGKTCAIVSFESLPWACRIQKFAREVQVLGPKDTLACAIINRGCRAYFPILPTIQYIIGKEPKLTLAANYLSINLLADSVVHPPMMYGTWKDWDGKPVSEKPLFYQGLNDFAAGMLDKVSTELFNTAQAIQKKYPDMDMSDVIHLFDWYKLNYKESISDFSTLQTAMRTCKAYNGLVHPMKEVEGGKFVPDFNYRYMTEDLPFGMVVFRGIAQIAGVPTPAMDETILWGQKILGKEFLVNGELTGKDMGMTRAPQRYHFTSLF…	>tr|A0A6P7T4Z8|A0A6P7T4Z8_OCTVU opine dehydrogenase OS=Octopus vulgaris OX=6645 GN=LOC115219799 PE=4 SV=1	0	4.474	0	7	2	2	0	2	405	45.1	7.33	5.12	7	2	2	0	0	Not Found	High	Not Found	Not Found	High	Not Found	Not Found	High	Not Found	1
High	Master Protein	-8908692472897283524	13	A0A0L8HB35	CCT-beta OS=Octopus bimaculoides OX=37653 GN=OCBIM_22018710mg PE=3 SV=1	MNYINPMNPVQILSSGAEEEKSEIARLSYFAGAITIGDVVKSTLGPKGMDKILLKQGRGENAIEVTNDGATILKSLGVDNPAAKVLVDISRVQDDEVGDGTTSVVVLACELLKEAENLIRMKIHPQTIISGWRKATAVAREALEKSANDNGNDPVKFRQDLKNIALTTLGSKILTQHSDHFAELAVNAVLKLKGNIDISVIQIIKKLGSGMKDSYLDEGFLLDKKIGVNQPKRIENAKILVANTPMDADKIKVFGSRVKVDAISKVAELEVAEREKMKDKVNKILKHGCNVFINRQLIYNYPEQLFSDAGVMAIEHADFEGVERLALVTGAEIVSTFDAPDCVKIGHCDIIEEVMIGEDKLIKFSGVALGEACSVVLRGATQQILDEAERSLHDSLCVL…	>tr|A0A0L8HB35|A0A0L8HB35_OCTBM CCT-beta OS=Octopus bimaculoides OX=37653 GN=OCBIM_22018710mg PE=3 SV=1	0	4.451	0	2	1	1	0	1	537	58.1	6.16	3.22	2	1	1	0	0	Not Found	High	Not Found	Not Found	High	Not Found	Not Found	High	Not Found	1
High	Master Protein	207709537185636587	239	Cluster-119530.0;orf1 len=85 frame:2 start:2 end:256 gi	795172998 ref|XP_011842978.1| PREDICTED: tubulin alpha-1B chain isoform X5 [Mandrillus leucophaeus]>gi|795173003|ref|XP_011842979.1| PREDICTED: tubulin alpha-1B chain isoform X5 [Mandrillus leucophaeus]>gi|795173006|ref|XP_011842980.1| PREDICTED: tubulin alpha-1B chain isoform X5 [Mandrillus leucophaeus]>gi|795173009|ref|XP_011842981.1| PREDICTED: tubulin alpha-1B chain isoform X5 [Mandrillus leu…	FVDLEPTVIDEVRTGTYRQLFHPEQLITGKEDAANNYARGHYTIGKEIIDLVLDRIRKLADQCTGLQGFLVFHSFGGGTGSGFTS	>Cluster-119530.0;orf1 len=85 frame:2 start:2 end:256 gi|795172998|ref|XP_011842978.1| PREDICTED: tubulin alpha-1B chain isoform X5 [Mandrillus leucophaeus]>gi|795173003|ref|XP_011842979.1| PREDICTED: tubulin alpha-1B chain isoform X5 [Mandrillus leucophaeus]>gi|795173006|ref|XP_011842980.1| PREDICTED: tubulin alpha-1B chain isoform X5 [Mandrillus leucophaeus]>gi|795173009|ref|XP_011842981.1| PRE…	0	4.39	0	29	2	2	1	1	85	9.4	5.76	5.45	29	2	2	0	0	Not Found	High	Not Found	Not Found	High	Not Found	Not Found	High	Not Found	1
High	Master Protein	-4382969130814008472	149	A0A6P7SLJ4	Alpha-galactosidase OS=Octopus vulgaris OX=6645 GN=LOC115213936 PE=3 SV=1	MVYLKIAFGLASILLLCQSVLSLDNGLALTPPMGWLSWERFRCNVDCDTDPDNCISERLFMQMADHIVADGFRDLGYEYINIDDCWLAKERDAEGRLQADPKRFPNGIKKLAQYIHGKGLKLGIYEDFGTKTCGGFPGSEFYMDIDAKTFAEWEVDFLKLDGCYSNANDMPYGYPLMGSFLNMTGRPILYSCSWPDYVSKPDYKAIAKSCNIWRNYHDVQDSWASIASIIKFYGDNKAKFAEVAKPGQFNDPDMLIIGDFGLSDNQQKVQMGMWAIMASPLIMSVDLRSIKPFAKELLTNKRIIAVNQDSLGIQGKRIWNVDNVDYWMKPILPNGSYAFAFVNFNTNGVPKKIDLSLKYLNLTEHAGYKLTEVFDGKFLGVYSPSSNFKASVNPTGIYM…	>tr|A0A6P7SLJ4|A0A6P7SLJ4_OCTVU Alpha-galactosidase OS=Octopus vulgaris OX=6645 GN=LOC115213936 PE=3 SV=1	0	4.381	0	4	2	2	0	2	411	46.2	6.02	4.02	4	2	2	0	0	Not Found	High	Not Found	Not Found	High	Not Found	Not Found	High	Not Found	1
High	Master Protein	8715941899411987709	368	Cluster-58773.109971;orf1 len=194 frame:2 start:2 end:583 gi	762113409 ref|XP_011439462.1| PREDICTED: inter-alpha-trypsin inhibitor heavy chain H3-like [Crassostrea gigas]	SEITEKTYVYLTLKQLLKEDRTEEVRNDILNLALKYNFVTPLTSMVVTKSRVKEELFEEEEDVSPSSRPHGAYLHGLPPSGGPQGSYYRGPHGQSSNIRGLPPLGMTYIHPATFIMTTRRPYTRAPPRTTTTRVPSFQHSPGVLIKPLNCSTDLCFTDSIQCRNQTEIFLLSDGQAGMRFNININNMNINCLS	>Cluster-58773.109971;orf1 len=194 frame:2 start:2 end:583 gi|762113409|ref|XP_011439462.1| PREDICTED: inter-alpha-trypsin inhibitor heavy chain H3-like [Crassostrea gigas]	0	4.153	0	7	2	2	0	2	193	21.7	8.18	5.1	7	2	2	0	0	Not Found	High	Not Found	Not Found	High	Not Found	Not Found	High	Not Found	1
High	Master Protein	-8855380984182481015	19	A0A6P7SP60	peroxiredoxin-2 OS=Octopus vulgaris OX=6645 GN=LOC115215062 PE=3 SV=1	MLNLAQKAPEFKGMAVVNGEFKTIQLSDFKGKYLVLFFYPLDFTFVCPTEITAFSDRMEEFKDINCEVVACSTDSHYSHLAWINTPRKQGGLGEMKIPLLADKTHKIASDYGCLKEDEGISFRGLFIIDEKGVLRQITINDLPVGRSVDETLRLVQAFQFTDKHGEVCPVGWKPGSNTMKPDPKGSKEYFKQM	>tr|A0A6P7SP60|A0A6P7SP60_OCTVU peroxiredoxin-2 OS=Octopus vulgaris OX=6645 GN=LOC115215062 PE=3 SV=1	0	4.15	0	6	1	1	0	1	193	21.8	6.54	2.94	6	1	1	0	0	Not Found	High	Not Found	Not Found	High	Not Found	Not Found	High	Not Found	1
High	Master Protein	1924157337142165336	264	A0A6P7SDF8	pyridoxal 5'-phosphate synthase subunit SNZERR OS=Octopus vulgaris OX=6645 GN=LOC115211795 PE=3 SV=1	MSGQTIATGITTDPDVVVTNLTAVKDETAGRKTGTFKVKAGMAQMAKGGIIMDVTNAEEACIAEEAGACAVMALERVPADIRRQGGVARMTDPLKIKEIMNAVTIPVMAKARIGHFAEAQILEALGVDMVDESEVLTAADVDNHIDKHKLKVPVVCGARDLGEALRRISEGAAMIRTKGEAGTGDVSEAVRHARTINREIRTAQAMDSTELYEYAKKLQVPIELLRRTAEMGRLPVVNFAAGGIATPADVSLLMQLGVDGVFVGSGIFKSSLPEKRARAMAQAVTHYNEPSVLAELSENLGEAMFGIPHTDRPQDKRREGPIGEEVKIWNATLSNQSSSTKVSS	>tr|A0A6P7SDF8|A0A6P7SDF8_OCTVU pyridoxal 5'-phosphate synthase subunit SNZERR OS=Octopus vulgaris OX=6645 GN=LOC115211795 PE=3 SV=1	0	4.147	0	4	1	1	0	1	344	36.7	6.14	4.27	4	1	1	0	0	Not Found	High	Not Found	Not Found	High	Not Found	Not Found	High	Not Found	1
High	Master Protein	5912510091612130734	328	A0A6P7U678	collagen alpha-4(VI) chain OS=Octopus vulgaris OX=6645 GN=LOC115232146 PE=4 SV=2	HHDFLALISIIQLGNAAILKDANSDNLDELLIELERKRSNDVIEDDVLAKSCEGKPAEIVYIIDDSRSIRKSDFEKQIDFVVDVTKTFPIGADKVRVGAVTFGDKIITKNTFPLTKYTDEKSLLTGLANIIFSPDDGGSTETAKAISYARKSIFVDSRPGVAKIAIILTDGESTVKYKTLAEAKLAKSLGITIITIGVGDKVDEAELIDVASPDSSFTVNSFDALQQIKVKLGMKACEAPTTIPPPTTTPPPTTTTTQPTTTTTLPTTTTTLPTTTTPMPKDEPCDKNIDVNFVFDSAMLGDQSTKDVISFIESSISEKDLDKSNIRFGAVSGPCEKVYGFNLNTYDTRDEILNHFDQMHQTAFAPLITTAYNESFRVENGGRVGARKVAVFFLKGKAQ…	>tr|A0A6P7U678|A0A6P7U678_OCTVU collagen alpha-4(VI) chain OS=Octopus vulgaris OX=6645 GN=LOC115232146 PE=4 SV=2	0	4.101	0	2	1	1	0	1	488	53.6	5.25	3.04	2	1	1	0	0	Not Found	High	Not Found	Not Found	High	Not Found	Not Found	High	Not Found	1
High	Master Protein	-8876336398922795309	17	A0A6P7SYD8	neutral protease isoform X1 OS=Octopus vulgaris OX=6645 GN=LOC115217300 PE=3 SV=1	MHLSVLLYCWYLLFGSLLLIKTSEAAYRVDAHERARRMVYHPSAPFQRRHLDKAEVTVRDLLGLKEYEEVEESNRIKTVEGTEVLRLQEKFLGVPIFDASLTVTEDKDGHLTGDATGTLIQGIEDDITNVKPKLSKSDVFDIAFKAEGDEIYANSIEPEYEIMIFMDENDKPRLAYYINYRIENEKVIKRPTFVIDGNTGEILLKYNNLNTISTVLTGSGGNEKSGIYKFSDKNHKAFLTQIGEMCFLENNYVKVIDMQNSFEKVSLNTDPIDYVCDVGFNDSVNAAISPALDAFYHGSMVSQMFQEWYNTSILNKQAILRVHYAKNYEGSYWDGKYCTFGDGHTRFYPTTVADVVAHEFAHGFTEQHSGLLYLNQSGSINEAFSDITGEVAEAYIDKN…	>tr|A0A6P7SYD8|A0A6P7SYD8_OCTVU neutral protease isoform X1 OS=Octopus vulgaris OX=6645 GN=LOC115217300 PE=3 SV=1	0	4.074	0	2	1	1	0	1	652	74.4	5.49	2.31	2	1	1	0	0	Not Found	High	Not Found	Not Found	High	Not Found	Not Found	High	Not Found	1
High	Master Protein	-8247340231316519320	38	A0A0L8FKC8	26S proteasome regulatory subunit 7 OS=Octopus bimaculoides OX=37653 GN=OCBIM_22017212mg PE=3 SV=1	MPDYLGNDQRKVKEEENDKEKSIQALDEGDIALLKTYGVGQYSKLIKACEDDVQSNLKKVNELTGIKESDTGLAPPAHWDLAADKQNLQNDQPLQVARCTKIINADTDDPKYIINVKQFAKFVVDLGDQVAPTDIEEGMRVGVDRNKYQIHIPLPPKIDPTVTMMQVEETPDVTYEDVGGCKEQIDKLREVVETPMLHPERFVDLGIEPPKGVLLFGPPGTGKTLCARAVANRTDACFIRVIGSELVQKYVGEGARMVRELFEMARNKKACIIFFDEIDAIGGARFDDGAGGDNEVQRTMLELINQLDGFDPRGNIKVLMATNRPDTLDPALMRPGRLDRKIEFGLPDHEGRTHIFKIHTKSMSVESKIRYELLARLCPNSTGAEIRSVCTEAGMFAIR…	>tr|A0A0L8FKC8|A0A0L8FKC8_OCTBM 26S proteasome regulatory subunit 7 OS=Octopus bimaculoides OX=37653 GN=OCBIM_22017212mg PE=3 SV=1	0	4.071	0	3	1	1	0	1	434	48.5	5.86	3.38	3	1	1	0	0	Not Found	High	Not Found	Not Found	High	Not Found	Not Found	High	Not Found	1
High	Master Protein	-8649775108542460158	27	A0A6P7SYN9	barrier-to-autointegration factor B OS=Octopus vulgaris OX=6645 GN=LOC115217368 PE=4 SV=1	MSTSQKFRNFVDEPMGDKSVKQLAGIGDTLGDRLIEKGYEKAYNVLGQFLLLNKDEELFKDWISETINANAKQGRDCFNCLKTWCDNYL	>tr|A0A6P7SYN9|A0A6P7SYN9_OCTVU barrier-to-autointegration factor B OS=Octopus vulgaris OX=6645 GN=LOC115217368 PE=4 SV=1	0	3.992	0	13	1	1	0	1	89	10.2	5.19	3.32	13	1	1	0	0	Not Found	High	Not Found	Not Found	High	Not Found	Not Found	High	Not Found	1
High	Master Protein	-625617761755829371	225	A0A7E6FIQ7	uncharacterized protein LOC115221679 isoform X1 OS=Octopus vulgaris OX=6645 GN=LOC115221679 PE=4 SV=1	MSCSYIIVAGGSRRPFLLTMLSTTFLVMTMIVMTSAEDSAEITSLEPKDGFKIGGRMNITCSLTTDNLLTFMLMRNSTIVVEIQYQKKAQGYVIIKKEMGFDCNLPSDNNVVKCWKNGLNCNDVAWYKCETNTAISSSKSLKVKSSIRSLREPFPPPEENQISTFTCDADVASSESSVVFRWTVNRGNNIDGVESEDRRVQVPKSSNCYTTVKSDYRYNVTIRDSSNTTITCTIFSESRSHTFSIPGRIPVTEAPVVGTAGGLDGGTIAGIVLGVIALIVLVVLLIWFFVIRKKADKPDTKPKSTGPPPTRKDYDERENAIYAKTDKMKQSEPSEALTDNHVYENNKAKGSRRHHPKKGSEFLPSHGDATDQMDELDEPYPPPPPPPPPSKPNHPPPVG…	>tr|A0A7E6FIQ7|A0A7E6FIQ7_OCTVU uncharacterized protein LOC115221679 isoform X1 OS=Octopus vulgaris OX=6645 GN=LOC115221679 PE=4 SV=1	0	3.989	0	5	2	4	0	2	484	53.5	7.11	6.2	5	4	2	0	0	High	High	Not Found	High	High	Not Found	High	High	Not Found	1
High	Master Protein	5948006925597831592	329	Cluster-58773.152800;orf1 len=247 frame:1 start:922 end:1662 gi	762070756 ref|XP_011421184.1| PREDICTED: glutathione S-transferase A-like [Crassostrea gigas]	PEVMLSLSRDSESLPSFSSKSMMSDITLYWGSGSIPCWRIMITLEEKGLDYNSRLMSFEKKEHKSNEITRLNPRGQLPTMKVGDCVVNESFAACDYLETVYKDKGTSLYPPASSEKQLALVLQKMHETCNIQQKMVTNIIYYLWGNPNPDKDLLTKRHAELAEELGRWEDYMKELKSTFLTGPDITMADVMFFPYIAFGVRSGLQLESRYPCLAAYYNMMNERPSVKKSWPPHWKGTSNNNVLADV	>Cluster-58773.152800;orf1 len=247 frame:1 start:922 end:1662 gi|762070756|ref|XP_011421184.1| PREDICTED: glutathione S-transferase A-like [Crassostrea gigas]	0	3.837	0	4	1	1	0	1	246	28.2	6.55	3.25	4	1	1	0	0	Not Found	High	Not Found	Not Found	High	Not Found	Not Found	High	Not Found	1
High	Master Protein	-9125957231073159477	2	A0A6P7ST76	elongation factor 1-beta OS=Octopus vulgaris OX=6645 GN=LOC115216350 PE=3 SV=1	MGFGDLKTDAGLKALNEYMSTRSYVEGYEPSQADSVVFGGLTTSPSANYCHAKRWFEHIKSFKTQVAKFPGVKKSLDSYGTGTTATKSKPADDSDNDDDDIDLFGSDDDEEDEERKKEHQKRIEEYNLKKSKKPAIIAKSNLILDVKPWDDETDMSKLEECVRSVSCDGLLWGASKFVPVGYGIKKLQITCVVEDDKVGTDYLDEEITKFEDYVQSVDVVAFNKI	>tr|A0A6P7ST76|A0A6P7ST76_OCTVU elongation factor 1-beta OS=Octopus vulgaris OX=6645 GN=LOC115216350 PE=3 SV=1	0	3.8	0	6	1	1	0	1	225	25.2	4.89	3.3	6	1	1	0	0	Not Found	High	Not Found	Not Found	High	Not Found	Not Found	High	Not Found	1
High	Master Protein	-5342585411073724812	118	A0A7E6ETD0	adenylyl cyclase-associated protein 1 isoform X4 OS=Octopus vulgaris OX=6645 GN=LOC115210264 PE=3 SV=1	MKSKSKKILQVTPDNKNSENPIYKSGNGVEPPIVEKVELDLQTKRASVETTDIKKETAPDPVASSKENTSTSEAKAKEFKQDIVKKPSSEQPVSSLPFASELIKASQKREKRIASELSNALAIAAEERARLNSGEMSAEQMIKSIERLETAVVSLERVSTRLETIANTSGKLVNAGNSEEVLSPFVVAYDDIIKGPVATFIALSSKINGNVKIQAAMVQEAFNAQRSFLVQVSRSKKPANDQMNHLLNPTSSKLQAIQELREKNRRDPYFNHLSAISESIPALGWVTLNTPVSYIKEMSDSALFYTNRVLKEFKEKDATHVDWTKAWINALKELQSYVKEYHTTGLSWNPQGGEAKVVPSGPAGFVAPPPPPPPPPPPPAIDMSVSSKDGGSSETDRVA…	>tr|A0A7E6ETD0|A0A7E6ETD0_OCTVU adenylyl cyclase-associated protein 1 isoform X4 OS=Octopus vulgaris OX=6645 GN=LOC115210264 PE=3 SV=1	0	3.798	0	2	1	1	0	1	614	67.1	8.25	3.34	2	1	1	0	0	Not Found	High	Not Found	Not Found	High	Not Found	Not Found	High	Not Found	1
High	Master Protein	-9040133302875542569	5	A0A6P7TBG1	uridine phosphorylase 1 OS=Octopus vulgaris OX=6645 GN=LOC115220972 PE=3 SV=1	MATIPNQRIKQMKDDHLFHIGINVPKDDVSKLFGDVKFVCMGGSAKRMAAYARLMEERLTAEGQEPYNYAQSTDRYVLYKVGQVLFVNHGIGIPSLSTVLQEIGKLLFHAGCSDVTFFRLGTSGGIGLDPGTVIISEKVVNWELQQQWNLPVLGKMVHNPAVPNKEIYSKLKAIADSLSLPNCLGTTMCCDDFYEGQGRLDGPFSSFSDEDRDAYLQHLQDKGVTNMEMESVGFVALCNKMNIPCAVICVTVVDRLKGDQITADHDHILQWEKRPIQIFFEYMKKHHLK	>tr|A0A6P7TBG1|A0A6P7TBG1_OCTVU uridine phosphorylase 1 OS=Octopus vulgaris OX=6645 GN=LOC115220972 PE=3 SV=1	0	3.78	0	14	2	2	0	2	289	32.4	6.68	5.48	14	2	2	0	0	Not Found	High	Not Found	Not Found	High	Not Found	Not Found	High	Not Found	1
High	Master Protein	3656794549621316992	295	A0A0L8GUX3	Uncharacterized protein OS=Octopus bimaculoides OX=37653 GN=OCBIM_22027429mg PE=3 SV=1	MSHRKFSAPRHGSKGFLPKKRSQRHKGKIKAFPKDDPKKPVHLTAFMGYKAGMTHIVREVDRPGSKVNKKEVLEGVTIIECPPVVCIGITGYIDTPRGPRAFKSIFAEHLGEECRRRFYKNWSRSKRKAYTKYAKKYQDAAGKKSIEKDYQKLIRYCNTIRIIVHTQIRQLRKRTKKAHICEIQLNGGTTEDKVKWARANLEKPISIADVFQQDELIDVIGVTRGKGMKGVTSRWHTKKLPRKTHKGLRKVACIGAWHPSRVQYSVARAGQKGYHHRTEINKKIYRVGRGIHTHDGKVVKNNAATEYDPTDKSITPVGGFPHYGKVNQDFLMLKGCVMGPRKRILTMRKSLLTHFKRKALEKITLKFIDTASKFGNGRFQTLAEKRNFMGPLKKDRLKE…	>tr|A0A0L8GUX3|A0A0L8GUX3_OCTBM Uncharacterized protein OS=Octopus bimaculoides OX=37653 GN=OCBIM_22027429mg PE=3 SV=1	0	3.774	0	3	1	1	0	1	402	46.1	10.37	2.81	3	1	1	0	0	Not Found	High	Not Found	Not Found	High	Not Found	Not Found	High	Not Found	1
High	Master Protein	375344792743096698	243	A0A6P7SYQ3	pancreatic triacylglycerol lipase-like OS=Octopus vulgaris OX=6645 GN=LOC115217380 PE=3 SV=1	MEWYTLVSVICLLAVTNGSIFDSEVCFGELGCFSNEGEFVSLERPINLLPNKPEEIGTQFFLYTRSNPLTGDELETHNDSLLHLSNFTATNPTKFIIHGYKSFGKDKPWVLNMTRELLKHGDYNVIVVDWINGSDVTYARAASNCRVVGAQIALLINYLNNQTASTPQTMHLIGHSLGAQIAGYAGERLTNLARISGLDPSAPYFEHTGPKVRLDPTDAEFVDVIHTDIGYILGLGLGINGQSGHVDFYPNGGRYQPGCTEYKIPGAIVGGIIGLLNKLKPGAKAAFMCSHKRSEALFTESINSVCPFNSYSCSDVHDIKSGKCFHKHGQLGRLGFHADKVLGRGKHMLQTFDAQPYCAYHYQMIIVGKSTINGRIFVTLTGTNGTSERLEMTDHNTFV…	>tr|A0A6P7SYQ3|A0A6P7SYQ3_OCTVU pancreatic triacylglycerol lipase-like OS=Octopus vulgaris OX=6645 GN=LOC115217380 PE=3 SV=1	0	3.688	0	4	1	1	0	1	480	53.1	6.48	3.97	4	1	1	0	0	Not Found	High	Not Found	Not Found	High	Not Found	Not Found	High	Not Found	1
High	Master Protein	-7995762268995808730	49	A0A6P7SCB7	gelsolin-like protein 2 OS=Octopus vulgaris OX=6645 GN=LOC115211599 PE=4 SV=1	MSGLRKQKQYDWKDSNISLFGSSTDRDVKKEAAEHEKAWQAVGKETGLLVWRIEKFKVKEWPKKDYGLFYEGDSYIVLNTYLEENGEKFNYDVHFWIGKYSTQDEYCAAAYKTVELDTFLDDVPVQHREVQGHESDLFKSYFKKMTFLKGGVDSGFRVVTEKTYQSRLLHFCGTKKNVEVKEVAKNRDMLDSGDVYILDLGKTIYQWNGAGSNKDEKFKAVMYINELKNERSIAIKTEVLEEDSTEADHEFYTSLTEEKEEETHFTSEEGPKELYRLSDSSGKVQFHLEKKGDIGKHDLDSKDVFVIDTKKEIVVWIGLDSSSTEKNNAMTYAHNYLMNKPNSLLPVTCLLEGKHDNKLISALAA	>tr|A0A6P7SCB7|A0A6P7SCB7_OCTVU gelsolin-like protein 2 OS=Octopus vulgaris OX=6645 GN=LOC115211599 PE=4 SV=1	0	3.681	0	4	1	1	1	1	365	42.1	5.66	3.47	4	1	1	0	0	Not Found	High	Not Found	Not Found	High	Not Found	Not Found	High	Not Found	1
High	Master Protein	-4578130818144241556	143	A0A7E6F1S6	microtubule-associated protein futsch isoform X4 OS=Octopus vulgaris OX=6645 GN=LOC115215514 PE=4 SV=1	MEDFGTAAATKAALLLIIGEPVTEDHKHLIPEELAKGFRTWDVEAAGVDINEEVSQIANKGALGEEGPYVNSFGPPNAGERVLRYSSTTLSVEALIAPQSTTVKRSLKNFLGAPVKYHHLIYAGHVLHGSGEWILQDAPFSFSSFAATLKDPDVENALKQQEEGILNIHCFATGEWNNANLSKVGSKVLQINLNPEDKLSDLTGVLQFSTYLCNYVKCRSLKEMLRSSDVVGNIRFSKPTLYVFPGCQGDSALFGISGFNLLVNGGYNKKACFWDFTRHLDRIDALLLTHLGIDNLFGINSVLHRKSIENVHPEIGHVYFNAPKGNRNSQDESELDGKPSADSLLINLSNEGDKITDYVRQLRQVVNSCSRPATSPQIDPVNLYHKVGHGSLDMYIMNP…	>tr|A0A7E6F1S6|A0A7E6F1S6_OCTVU microtubule-associated protein futsch isoform X4 OS=Octopus vulgaris OX=6645 GN=LOC115215514 PE=4 SV=1	0	3.643	0	1	1	1	0	1	1715	188.2	4.87	2.68	1	1	1	0	0	Not Found	High	Not Found	Not Found	High	Not Found	Not Found	High	Not Found	1
High	Master Protein	8408181120801169951	360	A0A6P7TS50	Glutamate--cysteine ligase OS=Octopus vulgaris OX=6645 GN=LOC115225878 PE=3 SV=2	MVFITDGTLMTWEEILPHISNVKKQGTMQFLYQYKKYKDEKNYPFYWGDETEYSLIRFDHEERVVQLPLTSTSFFESPQVQALESSLWTPEYAEFMMEGKPRNPFGTAITDLNRTEEHFIERRKAIKQFLGPNESLVSLTAFPRLGCPNFSFPSYEVNKHPTELYKSVFVPDEALSSRLPLFLNIRENFTTRKEERISINVPIYKDKNTMMPYGEDLSEYGDNEEMKKYLTPGFIYMDAPVFGAGCCSIQVTFQAADIKEAAYLYDNLVPLTPIMLPFTAAAPIHRGFLTDVDTRWLSLSQSCDDRTRQERGLEPLTNGSVFIPTTRFDTVCSYLSVSDQFYNDYDYSYDPEQYEVLKAEGVDEMMAKYVAQLLVRDPITLYKEKVHQDVEDTDHIQTI…	>tr|A0A6P7TS50|A0A6P7TS50_OCTVU Glutamate--cysteine ligase OS=Octopus vulgaris OX=6645 GN=LOC115225878 PE=3 SV=2	0	3.558	0	2	1	2	1	1	606	70.6	5.24	3.07	2	2	1	0	0	Not Found	High	High	Not Found	High	High	Not Found	High	High	1
High	Master Protein	-4573412296982521404	144	Cluster-58773.140088;orf1 len=263 frame:2 start:32 end:820 gi	357608316 gb|EHJ65928.1| Ecdysteroid-regulated 16 kDa protein [Danaus plexippus]	YVLAYTHTHTHDRFCVSFSFPNTPTTPRTIPIHLHICINVYKQRFLPKISTSVTASSQTTAIPNMAIVYSASAFLMLVCATITMATSPHQKCPADLGTPTDVRISDCTKSPCILKKNTNVSIEVDFTATADVQTVKDAVYGIIAGIHVPFPTSQPDACKDKGLTCPLKKGQKYTYKSVIPISSTYPDVSRARFPSPTGDIECSLWSCFEVPEGCARGTRGVRKGYARGYAACRNDCGCVSCVCLRSTFPNFSILHFLSHTHTH	>Cluster-58773.140088;orf1 len=263 frame:2 start:32 end:820 gi|357608316|gb|EHJ65928.1| Ecdysteroid-regulated 16 kDa protein [Danaus plexippus]	0	3.535	0	5	1	1	0	1	263	28.8	8.56	2.97	5	1	1	0	0	Not Found	Not Found	High	Not Found	Not Found	High	Not Found	Not Found	High	1
High	Master Protein	-9178500500781344158	1	A0A7E6EZI8	uncharacterized protein LOC115214248 OS=Octopus vulgaris OX=6645 GN=LOC115214248 PE=4 SV=1	MVVTKSEYLARVQSELSRYRYFEKEPTPQLLAEVQRKCSTLSIPIPRDDKGGILPYPTTKSKKEIFNREKYSEVDNHALKAPTELHAAELSELVSYLLKPAKTDVAKVRVIFRWISGQDLLRYKHIHAPPKESAAMYLNDLKQNKGSYESLFRQMCKYAGIPCEKITGYAKGVSYNVGEDIGDTARNTWNAVLVDKSWRLIDMQWASRQVVTQDKGEWELIDDGTGSKPAKSEDSDVSYDIYAYEEFYFLTDPEEFVYSHFPDEEAWQLLARPMTFEEFQKIAYLRSKFFELSMTVMSHPWCVLQAVNGEANLDMGFISDTMKFSYNLYRSTKVEHKQIQGNVDMDKFLFLETIPDDKTLSVEIFFPTTGKFKAEIFGRDTNETDTVLKWLCTYVFYCE…	>tr|A0A7E6EZI8|A0A7E6EZI8_OCTVU uncharacterized protein LOC115214248 OS=Octopus vulgaris OX=6645 GN=LOC115214248 PE=4 SV=1	0	3.503	0	0	1	1	0	1	6596	732.8	5.74	2.78	0	1	1	0	0	Not Found	High	Not Found	Not Found	High	Not Found	Not Found	High	Not Found	1
High	Master Protein	-1929036388542512012	201	A0A6P7TK16	Phosphomannomutase OS=Octopus vulgaris OX=6645 GN=LOC115223856 PE=3 SV=1	MASRDMSTICLFDIDGTLTLPRQVISGEMKESLKALQQKVAVGLVGGSDKAKIVEQMGSNSDVIKEFDYFFSENGVIAYKNGDLIGEESIQKHFGEDKLQDVINFGLHYMSTIRLPCKRGTFIEFRKSMMNFCPIGRSCSQAERDAFSKYDQEHQVRKKFVDALYEKFPDLGLNYVIGGQISIDVIPEGWNKSYCLKFIKRDGFKTIHFFGDKTQPGGNDHEIYEDKRTIGHVVKNPADTIQQLQELFLG	>tr|A0A6P7TK16|A0A6P7TK16_OCTVU Phosphomannomutase OS=Octopus vulgaris OX=6645 GN=LOC115223856 PE=3 SV=1	0	3.499	0	6	1	2	0	1	250	28.3	6.55	0	6	2	1	0	0	Not Found	High	Not Found	Not Found	High	Not Found	Not Found	High	Not Found	1
High	Master Protein	4344938991797810301	301	A0A6P7SE31	26S proteasome non-ATPase regulatory subunit 2 OS=Octopus vulgaris OX=6645 GN=LOC115211842 PE=3 SV=1	MADKKKNDADSKEKSDTKVPPKDEEQDLSEEDKQLQESLNLMVERLTESDQQQYRQALECLRTEIRASTTSMTSVPKPLKFLRPHYGSLKKAYEKIIDEETKRFCADIISVLGMTMSEERDSLKFRLLGSNEEIGSWGHEYVRHLAGEVIQEWQETSEKDSEIREKLISLAKDIVPYHMEHNAEAEACDLLMEIEQLDLLEEHVDENVYPRVCLYLTSCVPYVPDPENTILIRKAVHLYRKFKQYPHAMRFAMQVNDLQLMRDLFYSCDDLLMQKQLSYMLGRQQIYMELDEGTPELEEIKDIMFNTHLNGHFLALGSELDILEPKLPENIYKTTSESNRTTIGSGNVDSARQNLAASFVNGFVNAAFGKDKLIMEGNEWLNKNKDIGMLSATASLGLI…	>tr|A0A6P7SE31|A0A6P7SE31_OCTVU 26S proteasome non-ATPase regulatory subunit 2 OS=Octopus vulgaris OX=6645 GN=LOC115211842 PE=3 SV=1	0	3.473	0	1	1	1	0	1	905	100.5	5.44	2.79	1	1	1	0	0	Not Found	High	Not Found	Not Found	High	Not Found	Not Found	High	Not Found	1
High	Master Protein	-1656804529568562335	208	A0A6P7T1G4	uncharacterized protein LOC115218491 OS=Octopus vulgaris OX=6645 GN=LOC115218491 PE=4 SV=1	MRLSIAFVLLCLSLCQAKNISSDIGGILEGSWSSEENLLLTFNQRNNSLSATLTISCSRGYNFTGNITNSNTFHLYGAFNTTAIAVTGQLYKTNQNNKILKITLLKYDYANCTNYTPTKISFHELKPSQNISNSSATQSYYNWYNYLADNWSLENFKQEDANCSLEGTWYNDLGSTMVIKQNEDGLLEGQFRTAVERVNGSSGGFKANVHGAISPYSVFSFGIVWNEGTSISSFVGQCIPSSNNATFLKTQWTMLVGQETFDTSWKAFYNGMNNFYRDTEGSFASVWLSEEGIGIEFKEPNNALSAEVVFPCGRQYSVKGAMTNNNTLYLYGANQSTAIGVTGLFFKTKIGQLLKITLVKYDYANCTEYTPTKLSSHELKPTQTLSYNPDLWMYHNYDD…	>tr|A0A6P7T1G4|A0A6P7T1G4_OCTVU uncharacterized protein LOC115218491 OS=Octopus vulgaris OX=6645 GN=LOC115218491 PE=4 SV=1	0	3.422	0	2	1	1	0	1	534	59.6	5.88	3.62	2	1	1	0	0	Not Found	High	Not Found	Not Found	High	Not Found	Not Found	High	Not Found	1
High	Master Protein	-5916961812846717614	103	A0A0L8HJQ8	Peptidase M20 domain-containing protein 2 OS=Octopus bimaculoides OX=37653 GN=OCBIM_22013224mg PE=3 SV=1	MDVDVKSIVHDVFTNEIFAQELSDISKEIWTNPELGFKEYKAHDILTNFLENYGLTVERKYILSTAFRATFETAGSENGPHIAIMCEYDALPDIGHACGHNLIAEVGIAAGVALKTAMDDEGNKLTGKLTVLGTPAEEGLGGKVKLIDAGALETVDVAMMAHPSNKSIWRPKYLCLQGLNIQFTGKASHASSAPWNGVNALDAAVLCYQNISCLRQQMKPTWRVHGIIKNGGIAPNIIPEFSEMEYFIRAPIKGELDTIVDKVICCANGAATATGCSLNYKLIQPGYWSLISNNTLADLFEKNSKTLSLEEDSGLVRYGGSTDMGNISHIVPSIHPKFDIGARCHQHTRDFATAAGSPDAQEITLKIAECIALTAVDILQNPSLVQQMKSQLQEDLVQE…	>tr|A0A0L8HJQ8|A0A0L8HJQ8_OCTBM Peptidase M20 domain-containing protein 2 OS=Octopus bimaculoides OX=37653 GN=OCBIM_22013224mg PE=3 SV=1	0	3.39	0	3	1	1	0	1	403	43.8	5.54	3.02	3	1	1	0	0	Not Found	High	Not Found	Not Found	High	Not Found	Not Found	High	Not Found	1
High	Master Protein	-1850438832662215027	203	A0A7E6ETN4	protein-glutamine gamma-glutamyltransferase K OS=Octopus vulgaris OX=6645 GN=LOC115211974 PE=3 SV=1	MSYRMVIIRVGDSSIGRDFRSTFFDSGSHSRESHSRFGRRDCFSLVSRRRRRGRRGGRVRFTSLERLYERLGRRKSVDESTDEEDEEDPTPGCLKVEDVDFKILKNTNKHETDEYSITSKVNDENEKQIPKLVLRRGFSFTVVIRFNRPYNAQTDRVSLQFAFGERPKLVKGSLVRLELTDTFKDGQWAAVLKNSKDSEITVEVHTPPNNYVGVWRMRVNIKIDEKKIVYTEPYEFYMLFNPFHKRDEVYMADEAERKEYVMRESGKIYVGTSHQIFGKTWNFRQFSDDVLECVLYLLEESELPLHARRNPVLVTRKLTALINSSDDNGVLTGNWSGVYTGGKSPLAWTGSAAIFQEYFKTKRPVKFGQCWVFSGVLTTGIYCCGPCPVKAIKTGDTTA…	>tr|A0A7E6ETN4|A0A7E6ETN4_OCTVU protein-glutamine gamma-glutamyltransferase K OS=Octopus vulgaris OX=6645 GN=LOC115211974 PE=3 SV=1	0	3.354	0	2	1	1	0	1	699	79.3	8.15	4.13	2	1	1	0	0	Not Found	High	Not Found	Not Found	High	Not Found	Not Found	High	Not Found	1
High	Master Protein	2780853021731891213	277	A0A7E6F497	ATP-citrate synthase OS=Octopus vulgaris OX=6645 GN=LOC115216353 PE=3 SV=1	MSAKAISEAKGKELLNRHLKDEAAKNRVVTITEDTNWDEVEQNNRWLFSEKLVVKPDQLIKRRGKLGLIKAGVDLNGAKAWLSEKINQEIEIGSAKGKLKNFVIEPFISHNQAEEYYVCIYSQRYENVILFHHEGGVDIGDVDAKAKRLEIPPGDPIKADMIASLIVHVSADVKEILSRFISALYNQYQDLHFTYLEINPLVVTNGKVFILDLAAKIDQCAEFLCKAKWGDVMEFPPPFGRDALPEEAYIADLDAKSGASLKLTILNKVGRIWTMVAGGGASVIYADTICDLGGASELANYGEYSGAPSEMQTYEYAKTILSLMTETKHKEGKILIIGGGIANFTNVATTFKGIVRALREYQQRLIEHNVSIYVRRGGPNYQEGLRIMKELGSTLGVPI…	>tr|A0A7E6F497|A0A7E6F497_OCTVU ATP-citrate synthase OS=Octopus vulgaris OX=6645 GN=LOC115216353 PE=3 SV=1	0	3.326	0	1	1	1	0	1	1089	120	7.43	3.51	1	1	1	0	0	Not Found	High	Not Found	Not Found	High	Not Found	Not Found	High	Not Found	1
High	Master Protein	-5593747488966247911	114	Cluster-58773.159728;orf1 len=257 frame:1 start:901 end:1671 gi	291224559 ref|XP_002732271.1| PREDICTED: methylmalonic aciduria and homocystinuria type C protein homolog [Saccoglossus kowalevskii]	LFTSYDPYRIIMAKEAEEIVRRVNEILGPFGFEAHPFKVKWYNELVGPNYQLEYHDDTFALITISTPQMFEKAFKPFIYNIYKKGDLAPIDHCVKYYTEKIQIQTVYPDTDLIYDFDQKAPQHYSILVQTAAHVAGAAYYYQKKDVINNPWGDKTIFGISIHPQYGGWFAMRAAIIFKNLKFADLKKKDPVDVIPDQETRIKLLNMLNEDWEYWKARDIIKVSERYTAEAINYFKTLPKDRYKLIEDMQANRKNNA	>Cluster-58773.159728;orf1 len=257 frame:1 start:901 end:1671 gi|291224559|ref|XP_002732271.1| PREDICTED: methylmalonic aciduria and homocystinuria type C protein homolog [Saccoglossus kowalevskii]	0	3.319	0	5	1	1	0	1	256	30.2	7.55	3.73	5	1	1	0	0	Not Found	High	Not Found	Not Found	High	Not Found	Not Found	High	Not Found	1
High	Master Protein	-5848973717449648210	107	A0A7E6EZ05	Vinculin OS=Octopus vulgaris OX=6645 GN=LOC115214348 PE=3 SV=1	MPVFHTKTIEGILEPVAQQVSKLVILHEEAEDGNAMPDLARPVQAVKMAVDNLVKVGYDTINNSEDQILKQDMPPALSRVEDASILLLQASDMLRGDPFSAPARKKLIEGSRGILQGTSALLLAFDESEVRKIIRVCKNVLEYLAITEVVDKMEDLVTYVKNLSPVLTKIIKEVDAREKELTHQVHRDMLIRSLDQVKNLTPVLISGVKIFITAKETGSGFIEAQKNRDYVVQKMSDEIHEIIRVLQLTTYDEENWDADDLTVMKKAQSAIEGKLKQASDWLQDPAALVGSAGDKALHQILEDARKIAERCADPAERDAIIRNVGDIESMANSLAELRQQGKGSSPQAMALAREIQNKLGSLQQLTQMGIVNTERSGIRKPAPTVSGKVEQAQRWLANP…	>tr|A0A7E6EZ05|A0A7E6EZ05_OCTVU Vinculin OS=Octopus vulgaris OX=6645 GN=LOC115214348 PE=3 SV=1	0.001	3.258	1	1	1	1	0	1	974	106.9	5.64	2.23	1	1	1	0	0	Not Found	High	Not Found	Not Found	High	Not Found	Not Found	High	Not Found	1
High	Master Protein	-4712989139109597136	138	A0A6P7S7P4	Peroxiredoxin-5 OS=Octopus vulgaris OX=6645 GN=LOC115209798 PE=3 SV=1	MDVIKVGDAIPSASLFEHNPNTKLNSSELFGSGKHVIFGVPGAFTPTCSESHLPGYIEKHNELKKKGIASINCVAVNDPFVMKAWGETHNATGKIRMLADIQAEFTKALGLEIDLSAVLGNVRSKRYAMVVENGIVKQLLVEPSGIELTCSAANKLMSEI	>tr|A0A6P7S7P4|A0A6P7S7P4_OCTVU Peroxiredoxin-5 OS=Octopus vulgaris OX=6645 GN=LOC115209798 PE=3 SV=1	0.001	3.204	1	7	1	1	0	1	160	17.2	7.02	2.17	7	1	1	0	0	Not Found	High	Not Found	Not Found	High	Not Found	Not Found	High	Not Found	1
High	Master Protein	-9016118627856051013	7	A0A812BJI2	Non-specific serine/threonine protein kinase OS=Sepia pharaonis OX=158019 GN=SPHA_16686 PE=4 SV=1	MIQKQRTRVLSSSSKENSNPPPQLSTPTEALVTGGSNIPAIPTTSASNSNKSDTIINTSSTVAAATTTTTTTTTTTLDLTSTQKVLSSPSSTTGVLSSPAHPSSQPLPATTVPSNQPAAVSPSSLSASSAQKADGSSPVPSTTQHSNTPTPISLSSSGQLPKIPSAAIGPMMKLTDDTPPTDNQLLGITRLQATPTDANSTTNDGNSTAVPPAATNQKMPSSTSTGTTSSAGATQTSSGATADKPVGESPLQKTGGSPIGLVLRLRNEKRVLNDIKFDFTPGQDTSDSVSRELVEAGLVDGRDLIVVAANLQKVLDNPVENKNITFALNSGFGPNEAPDDKTLIGFAQLTINESTNTNL	>tr|A0A812BJI2|A0A812BJI2_SEPPH Non-specific serine/threonine protein kinase OS=Sepia pharaonis OX=158019 GN=SPHA_16686 PE=4 SV=1	0.001	3.195	1	3	1	1	0	1	359	36.6	5.47	2.55	3	1	1	0	0	Not Found	High	Not Found	Not Found	High	Not Found	Not Found	High	Not Found	1
High	Master Protein	-6647996547589601707	86	A0A6P7TXK0	medium-chain specific acyl-CoA dehydrogenase, mitochondrial OS=Octopus vulgaris OX=6645 GN=LOC115228127 PE=3 SV=1	MAANIITKVLRSGRRCGVQCLRPYSNAGFSFSLTEDQKDMQQLARKFAREEIMPIAAHHDKTGEYPWDIVKKVFDLGLINTHIPKEYGGLGLGIADSCITTEELAYGCTGIQTAIEANSLGQVPVILAGNDAQKKKYLARMLEEPLMCAYCVTEPGAGSDVAGIKTKAVKKGNEYVINGQKMWITNGGVANWYFLLARTDPDPKASAGKAFTGFIVDADTPGIIKGRKEWNMGQRASDTRGITFEDVVVPAENVLGAEGIGFKIAMGAFDKTRPAVAAGACGLAQRAFDEATKYSMERKTMGQPICTHQAVAFMLADMAIGIESARMMTYKSAWEIDNGIRNTYNASIAKCLAGDVANKCTTDAVQIFGGNGFNSDYPVEKLMRDAKIYQIYEGTAQIQ…	>tr|A0A6P7TXK0|A0A6P7TXK0_OCTVU medium-chain specific acyl-CoA dehydrogenase, mitochondrial OS=Octopus vulgaris OX=6645 GN=LOC115228127 PE=3 SV=1	0.001	3.188	1	4	1	1	0	1	415	45.2	8.12	3.29	4	1	1	0	0	Not Found	High	Not Found	Not Found	High	Not Found	Not Found	High	Not Found	1
High	Master Protein	-8172271190948970003	44	A0A6P7SUD6	6-phosphogluconolactonase OS=Octopus vulgaris OX=6645 GN=LOC115216558 PE=3 SV=2	MLFGSLKMAPTRVVSSSGEDLEQRLADLLTSKSEQALKSDRLFIIGVSGGSVSKYLCNTFCKLSTNWAKWRIFFCDERYVPHEDPECTYKYYKENFLSKVKDMSADHIYPIKADLPIDECAKNYSDKIAAVFDITPGTFPRFDVVLLGMGPDGHTCSLFPGHHLLDEKVAVVSPISDSPKPPPGRVTLTLPVLNRSACAVFMATGENKAELVRKALEPVDSDGDMIPAGRVSPVDGELIWFLDAASAKQLKH	>tr|A0A6P7SUD6|A0A6P7SUD6_OCTVU 6-phosphogluconolactonase OS=Octopus vulgaris OX=6645 GN=LOC115216558 PE=3 SV=2	0.001	3.188	1	5	1	1	0	1	252	27.8	6.3	2.68	5	1	1	0	0	Not Found	Not Found	High	Not Found	Not Found	High	Not Found	Not Found	High	1
High	Master Protein	-8284979299337263077	36	A0A6P7TSR4	Carboxypeptidase OS=Octopus vulgaris OX=6645 GN=LOC115226095 PE=3 SV=1	MRVSSVRALLVVGLVGVALITTATAAANEDLIHSLPGLKKQPMFQQYSGYLDGIDGRHLHYWLVESQQNPKTDPLVLWMNGGPGCSSLLAVLTEHGPYVIQDDTSLEYNPHSWNKIANVLYLEAPAGVGFSYKDDKNYTTDDDLTSLNNLAAIKSFFKKFPEYNGREFFVTGESYGGIYVPTLSERLLGEPSINFQGFAVGNGMSDYRINAASILYFGYYHGLYGSKLYANLLSSCCGSNTTVCYISKTPSAQCGFYAGKALNLIYASDLNMYNLYAKCEKTEIPGGFQQYHDMGNSFRNFPQFIKERQELRMKDPKSLKLVPPCINGTASLVYFSRADVRKALNIPTSVASWDLCSNVVSEHYKRTYRTMYLQYLKVFAAKKRILLYNGDVDMACNFL…	>tr|A0A6P7TSR4|A0A6P7TSR4_OCTVU Carboxypeptidase OS=Octopus vulgaris OX=6645 GN=LOC115226095 PE=3 SV=1	0.001	3.18	1	3	1	1	0	1	473	53	8.28	4.06	3	1	1	0	0	Not Found	High	Not Found	Not Found	High	Not Found	Not Found	High	Not Found	1
High	Master Protein	7001243454318738701	343	A0A0L8G8E4	TGc domain-containing protein OS=Octopus bimaculoides OX=37653 GN=OCBIM_22038334mg PE=3 SV=1	MTPQRYVLKYLTHPVYLTFLLFLFDLISIEETLKFQSLHLHLESNRKSHHTDEFDQKYLIVRRGSSFILGLTFHRKVIKEIDDVVLQFSVGDKPQESKGTLIRLKLFEDLRPRALNKVKRNKWIVKCLSVEGETIQVEVTPAANSSIGNYMIFVETKNADEKDDEVERYLHKESFILLFNPWCKDDTVYMENEKLLDEYILNETGRIWVGSSKFFRGRPWNFGQFQEPCLDVALLLLDKGGLSTAAKRDPVTVIRCLTALTNSNDDDGLIEGMWAADYPKPSTRPSEWSGSTAIISQYVETLQSVRYGQCWVFSGLMTTLLRALGIPTRSVTNFQSAHDSNASITIDTHFDENMEPLDFLNDSIWNFHVWNESWLRRPDLPSGYDGWQAHDATPQESSD…	>tr|A0A0L8G8E4|A0A0L8G8E4_OCTBM TGc domain-containing protein OS=Octopus bimaculoides OX=37653 GN=OCBIM_22038334mg PE=3 SV=1	0.001	3.144	1	2	1	1	0	1	723	82.3	5.67	2.87	2	1	1	0	0	Not Found	High	Not Found	Not Found	High	Not Found	Not Found	High	Not Found	1
High	Master Protein	-8943456739625830726	10	Cluster-58773.150174;orf1 len=107 frame:1 start:838 end:1158 gi	524881845 ref|XP_005097572.1| PREDICTED: ganglioside GM2 activator-like [Aplysia californica]>gi|524881847|ref|XP_005097573.1| PREDICTED: ganglioside GM2 activator-like [Aplysia californica]	QKTNTMKLLLLSCLVGFCLADNVLRYQLHRPAQVNLERFRTWIMEHKNLKSFTWSDCGNSSSTLKVKNLIIGPDPVRLPGDLTIGFDLDIAEDFDDSLSCSVEIYKK	>Cluster-58773.150174;orf1 len=107 frame:1 start:838 end:1158 gi|524881845|ref|XP_005097572.1| PREDICTED: ganglioside GM2 activator-like [Aplysia californica]>gi|524881847|ref|XP_005097573.1| PREDICTED: ganglioside GM2 activator-like [Aplysia californica]	0.001	3.048	1	9	1	2	0	1	107	12.2	7.21	5	9	2	1	0	0	Not Found	High	High	Not Found	High	High	Not Found	High	High	1
High	Master Protein	8799163658702716811	370	A0A6P7S644	Proteasome subunit beta OS=Octopus vulgaris OX=6645 GN=LOC115209401 PE=3 SV=1	MASVMTGGLSYSSMSNQIYSDMGMDWMNQEQTTGTTIAAVEFNGGVVIGADSRSTAGVYIANRVTDKLTKMTDYIYCCRSGSSADTQAVADIVHYHLNFYRMEMGEEPRVNVAANIFKDLCYNYRDSITAGIIVAGWDEQMGGQVYTIPLGGMINRMPCAISGSGSIYIYSYVDSNFKPNMTKEECLKFTANCISLAMTRDGSSGGVIRLAAITKNGVDRVNLIGDEIPKFNDS	>tr|A0A6P7S644|A0A6P7S644_OCTVU Proteasome subunit beta OS=Octopus vulgaris OX=6645 GN=LOC115209401 PE=3 SV=1	0.001	3.046	1	4	1	2	0	1	234	25.5	5.1	5.42	4	2	1	0	0	Not Found	High	High	Not Found	High	High	Not Found	High	High	1
High	Master Protein	6617721885824808665	338	A0A6P7TRV9	Ubiquitin-activating enzyme E1 OS=Octopus vulgaris OX=6645 GN=LOC115225288 PE=3 SV=1	MSSGSETQTSSPPPTKRSRVESEPPAALNCCNTNNISPVKTIDMAKNGTEDQNIIDESLYSRQLYVLGHDAMRRMAHSNILISGIKGLGVEIAKNVVLGGVKSVTIHDTENAEWADLASQFFLREEDVGKNRAEVSAPRLAELNNYVPVNCYMGDLNEEFLKKFQVIVLTTSNLDEQQRINDLCRKFGMKFIVASTKGLFGQIFCDFGSGFVVADVDGEQPITNMVASITKDSEGIVTCLDEARHGYEDGDYVSFSEVQGMINLNSSDPIKIKVLGPYTFSIGDTTAHPQYNCGGIVKKVKMPKKLDFKPLREAIANPEYVVTDFAKFDRPPLLHLAFQALDEYVKTHSSSPRPRNEEDAEKFLAICKELNAGSANAVEELDEKVLKEFSYQSRGDICP…	>tr|A0A6P7TRV9|A0A6P7TRV9_OCTVU Ubiquitin-activating enzyme E1 OS=Octopus vulgaris OX=6645 GN=LOC115225288 PE=3 SV=1	0.001	3.02	1	2	2	2	0	2	1062	119.1	5.49	2.45	2	2	2	0	0	Not Found	High	Not Found	Not Found	High	Not Found	Not Found	High	Not Found	1
High	Master Protein	2758080766857678539	276	Cluster-960.0;orf1 len=210 frame:1 start:22 end:651 gi	164608848 gb|ABY62755.1| sarcoplasmic calcium-binding protein [Artemia franciscana]	AKCRSLCAVELHKEYKMANNWDNRVRFIVRYIYDVDNNGFLDKNDFESMAFRSTVLEGKGTLEATRQKTNTKLYMDLWDKIAELCDFDRNGEVTVDEFKEGMKQICANKTIIQLPKEFRDFIAASFAQIDINGDGLIGIEEFRVDCVNRLAFKDSNAIDASFEALLSEEDRKKGGIDLKTYQELYAAFIGSQDATNRAVHLFGPLPELS	>Cluster-960.0;orf1 len=210 frame:1 start:22 end:651 gi|164608848|gb|ABY62755.1| sarcoplasmic calcium-binding protein [Artemia franciscana]	0.001	2.93	1	5	1	1	1	1	209	23.9	5.1	3.25	5	1	1	0	0	Not Found	High	Not Found	Not Found	High	Not Found	Not Found	High	Not Found	1
High	Master Protein	-3266352380190044735	165	A0A812BBI7	Annexin OS=Sepia pharaonis OX=158019 GN=SPHA_13606 PE=3 SV=1	MHGTVFPKDDFDCEAACRTLKEAMDGLGTNESDIITVLTSHSNAQRQEIKEQYKQLFGEDLIDDLKSELGGDFEDVCLALLDPPRVYDAHELHRAISGAGTSENPLIEIMVTRTNEELEEIKEIYRTEYEVELEDDLKSDTSGYFRRMLVSLCTASRDEGWWADPELAASDAQRIYDAGEGQAGTDECEINSVLCQRTLPQLQATLVAYQELTGNDLRESIESETSGSVQEGYLAILDAAIDLRKYFAKCIYNSMAGFGTSDSDLIRLIVSRSEIDLESIRAEFEDMYVQISIITILLLTIEKFSANGHS	>tr|A0A812BBI7|A0A812BBI7_SEPPH Annexin OS=Sepia pharaonis OX=158019 GN=SPHA_13606 PE=3 SV=1	0.001	2.928	1	3	1	1	0	1	310	34.7	4.4	2.29	3	1	1	0	0	Not Found	High	Not Found	Not Found	High	Not Found	Not Found	High	Not Found	1
High	Master Protein	-6461408116363958467	94	A0A6P7SPL2	glycogenin-1 isoform X2 OS=Octopus vulgaris OX=6645 GN=LOC115215187 PE=4 SV=1	MAEEGKEAFVTLATNDTYVLGCLVLGESLRRTKTQRKLVVLITKGVSECLRKNLKDVFDEVCEVDLISSHDYKNLQLLGRPDLNVTFTKLYCWKLTQYSKCVFLDADTLVLDCVDELFEKEELSAAPDPGWPDCFNSGVFVMQPNEETYKSLIQFAKTEGSFDGGDQGLLNLYFKDWATKDIKKHLPFVYNVVSQAFYSYLPAFKQFKQNVKIVHFLGAIKPWQHCYNAKTKKVTPLPNSGHDPDFLQRWWNIYMESVYPVIDHGKSEELKIALTGPIIGGDLSGHGQRAVMDEFEKRMAWEHGEIDYMGQDSFDNIQRKLDLNLNQNQSGSM	>tr|A0A6P7SPL2|A0A6P7SPL2_OCTVU glycogenin-1 isoform X2 OS=Octopus vulgaris OX=6645 GN=LOC115215187 PE=4 SV=1	0.001	2.876	1	5	1	1	0	1	333	38.1	5.71	2.07	5	1	1	0	0	Not Found	High	Not Found	Not Found	High	Not Found	Not Found	High	Not Found	1
High	Master Protein	-7861541910035745217	55	A0A6P7TBR4	golgin subfamily B member 1 isoform X3 OS=Octopus vulgaris OX=6645 GN=LOC115221474 PE=4 SV=1	MGCSLGKQAKKEAEEENLVDKPVEKNEENVLFERPAASGENAQEPLLQGVSVEVSKEGTADIQIDKTELDILKNVTDVGEAVSAEAAKVEAAVEEKKDEVASATAEAASTVSDVTKEVKSTLEKKEEDFVMVDKKDVAEDIKATAMEVASEVVKSVTEECKTMVTKEVSKITSSASEQVSKVVSGTNESVKTLSNNVSESVTKHTTSATESVSKITSSSTQEYKTVVSSVSKFSDSVGSAIDSVPAKEDVVTEVQHFTKESSKVIKSEPIITTVSETVTEVKKVESDSKDAGIVSFATEKVKEGVTKVADKVEEVVVPVVEEKVSTVISAVSEKMPSSLIDKFLPTSKESESSTVLTSNVDSSDVKELVEDKVSKEEPVDIPAVPLDIDVAETSVDSGK…	>tr|A0A6P7TBR4|A0A6P7TBR4_OCTVU golgin subfamily B member 1 isoform X3 OS=Octopus vulgaris OX=6645 GN=LOC115221474 PE=4 SV=1	0.001	2.853	1	2	1	1	0	1	1185	129.3	4.74	2.67	2	1	1	0	0	Not Found	High	Not Found	Not Found	High	Not Found	Not Found	High	Not Found	1
High	Master Protein	-1064726929357256562	218	A0A6P7TPR7	uncharacterized protein LOC115224696 OS=Octopus vulgaris OX=6645 GN=LOC115224696 PE=4 SV=2	MLLLPYWSIFLIISPHFIGTHAATKWNIVLCSRDEHNFVRISLDKIKYVNLTGGNGQKCFNTEFELDDATKPSYLEFKLDVATRPSLMLLEKDKVLQDFLPLYDAAAPLMNQLATVLTENINYALVQNRNLQEMYYGYYKWNSYNQTKTGLEKMDRWTFEVTRSDINDDFKSSYRAAPHYYANFTFSKYSRTSNASFFLSLHWNELNWIAFFTEGEFGLEKKVKVQNMANNKIYSCMYTYGIEPPGPAHICVWRNDSTWNIEMTYQSKYVNDYETIIFTLRVTGGERNSSVIVSLEESAYVSAFTNFFDIPNENINEIEIEFNGTKKPFDMTKVVMTKMLTGEEYGCVDIHWTNSMKCSCKVKKGKKWLLKVISPEVHERTFSVELIQDTLSSFTNHLT…	>tr|A0A6P7TPR7|A0A6P7TPR7_OCTVU uncharacterized protein LOC115224696 OS=Octopus vulgaris OX=6645 GN=LOC115224696 PE=4 SV=2	0.001	2.843	1	3	2	2	0	2	489	57.1	6.48	4.71	3	2	2	0	0	Not Found	High	Not Found	Not Found	High	Not Found	Not Found	High	Not Found	1
High	Master Protein	-989918983129714651	221	A0A6P7SKR8	Vesicle-fusing ATPase OS=Octopus vulgaris OX=6645 GN=LOC115213827 PE=4 SV=1	MGDKGSDYLATAILRDKERPNRLIVEEAANEDNSVVCLSQAKMDELQLFRGDTVLLKGKRRRETVVIVLSDDSASDNKIRINRCVRSNLRVRLGDIVSVQSCQDVKYGRRIHVLPIDDTVEGITGNLFEVYLKPYFLEAYRPVRKGDIFLVRGTMRAVEFKVIETDPSPYCIVAPDTIIHCEGKPVKREDEEEALNEVGYDDIGGCRKQLAAIKEMVELPLRHPQLFKAIGVKPPRGILMYGPPGTGKTLIARAVANETGAFFFLINGPEVMSKLAGESESNLRKAFEQAEKNAPAIIFIDEIDAIAPKREKTHGEVERRIVSQLLTLMDGLKQRAHVVVMAATNRPNSIDPALRRFGRFDKEVDINVPDATGRLEILRIHTKNMKLADNVDLEQIAQE…	>tr|A0A6P7SKR8|A0A6P7SKR8_OCTVU Vesicle-fusing ATPase OS=Octopus vulgaris OX=6645 GN=LOC115213827 PE=4 SV=1 >tr|A0A0L8GAT1|A0A0L8GAT1_OCTBM Vesicle-fusing ATPase OS=Octopus bimaculoides OX=37653 GN=OCBIM_22037045mg PE=4 SV=1	0.001	2.838	1	1	1	1	0	1	803	89	5.43	3.36	1	1	1	0	0	Not Found	High	Not Found	Not Found	High	Not Found	Not Found	High	Not Found	1
High	Master Protein	1659147252363916500	261	A0A6P7TG43	GDP-4-keto-6-deoxy-D-mannose-3,5-epimerase-4-reductase OS=Octopus vulgaris OX=6645 GN=LOC115222310 PE=3 SV=1	MTSSEKKVILVTGGSGLVGQAIKTVVNDKEKEPNEQWIFLSSKDADLLDRQQTEELFERTKPTHVIHLAAMVGGLFRNLKYNLDFFRKNTLMNDNVLHSSYKYKVKKVVSCLSTCIFPNKTTYPIDESMIHNGPPHDSNFGYSYAKRMIDVQNRAYHQQYGCHFTSIIPTNVYGPHDNYHLEDAHVVPGLIHKVYLAQKNNTPLTIFGTGAPLRQFIYSLDLAQLIVWVLLHYEEIDPIILSVGEEDEVSIKDVANMVIKSMNFTGEVIYDTSMSDGQFKKTASTTKLRKYLPNFKFTPIEQGIKDACDWFVQNFESARK	>tr|A0A6P7TG43|A0A6P7TG43_OCTVU GDP-4-keto-6-deoxy-D-mannose-3,5-epimerase-4-reductase OS=Octopus vulgaris OX=6645 GN=LOC115222310 PE=3 SV=1	0.001	2.826	1	8	2	2	0	2	320	36.5	7.34	4.51	8	2	2	0	0	Not Found	High	High	Not Found	High	High	Not Found	High	High	1
High	Master Protein	4582616471406789069	307	Cluster-58773.163293;orf1 len=95 frame:3 start:567 end:851 gi	871243797 ref|XP_012940045.1| PREDICTED: uncharacterized protein LOC101860584 [Aplysia californica]	IAFPGCYACKFVVKEIEERIASKPTEAEIRKVVDRICEEISEEVKKECDALIVNYEDVLIKLLVQRFPAETVCKKLQHCSDSHTLYYKPKMTIV	>Cluster-58773.163293;orf1 len=95 frame:3 start:567 end:851 gi|871243797|ref|XP_012940045.1| PREDICTED: uncharacterized protein LOC101860584 [Aplysia californica]	0.001	2.812	1	12	1	2	0	1	94	10.9	6.52	2.58	12	2	1	0	0	Not Found	High	High	Not Found	High	High	Not Found	High	High	1
High	Master Protein	-2595976221353958807	180	A0A6P7T914	thyroglobulin isoform X2 OS=Octopus vulgaris OX=6645 GN=LOC115220711 PE=4 SV=1	MPIYKDEDFLDSPQNLFAVVQDLLLSTMKYIFFIALSVVAAGAHICSPNACKYFECLPVENCVDGEIGKGFCGCCDICIKHLKEGDPCFLGDMFGSLVTSKCGLNLVCSRRSRTCIKPLNCTQLKSETEGKNLLGAFIPRCETDGTFSAVQCHGSVCYCAHTDGTRIPGFQSAIHNIQGMNCNCARHKFAYGKTGLIGKLFHCESNGNYNKIQCTGSACYCVDEVGKLVGESVHVSQRKSMTC	>tr|A0A6P7T914|A0A6P7T914_OCTVU thyroglobulin isoform X2 OS=Octopus vulgaris OX=6645 GN=LOC115220711 PE=4 SV=1	0.001	2.789	1	4	1	2	0	1	243	26.4	7.39	4.49	4	2	1	0	0	Not Found	High	High	Not Found	High	High	Not Found	High	High	1
High	Master Protein	-5899066435494067698	104	A0A0L8ICE8	Calponin-homology (CH) domain-containing protein OS=Octopus bimaculoides OX=37653 GN=OCBIM_22019394mg PE=4 SV=1	MSRAKKAGLGAEIERKMEQRYDKEEEAGTPAAVVSWINGLFEGTSNPTCPGSSMQQIHSYLQDGTNLCRLINRLLEAEGKPAINFSKNVRSPFIAMGNIETFSKTCESYGLNKEALFQSNDLTEGKKGPFLNVINCLHSLGFLANSKMVLPAYTGQQTKYMEDD	>tr|A0A0L8ICE8|A0A0L8ICE8_OCTBM Calponin-homology (CH) domain-containing protein OS=Octopus bimaculoides OX=37653 GN=OCBIM_22019394mg PE=4 SV=1	0.001	2.789	1	8	1	1	0	1	164	18.1	6.55	3.11	8	1	1	0	0	Not Found	High	Not Found	Not Found	High	Not Found	Not Found	High	Not Found	1
High	Master Protein	5639839805290829538	325	A0A6P7T858	Fructose-bisphosphatase OS=Octopus vulgaris OX=6645 GN=LOC115220925 PE=3 SV=1	MDTDCMTLTRFVLAEQKKYPDAKGDLTQLLNAILSAVKAVSSAVRKAGIHKLFGVAGGSNVSGDEVKKLDILSNDLFINMLKSSFTTALMVTEENENAVLVEVENQGKYIVCFDPLDGSSNIDCLVSIGSIFGIYRKLSSGPATENDALQPGRDLVAAGYALYGSATMVVLSTGQEVNGFMLDPSIGEFLLTEKNMKIKPRGKIYSLNEGYAQYWDKATTEYIKNKKHPKEGKPYGARYIGSMVADVHRTLCYGGIFMYPATSQTPKGKLRLLYECNPMSFIIEKAGGLATTGTMPILDVVPTGLHQRVPIFLGSKDDVQEIIDLYKVHGTK	>tr|A0A6P7T858|A0A6P7T858_OCTVU Fructose-bisphosphatase OS=Octopus vulgaris OX=6645 GN=LOC115220925 PE=3 SV=1	0.001	2.78	1	9	2	2	0	2	332	36.2	7.37	2.21	9	2	2	0	0	Not Found	High	High	Not Found	High	High	Not Found	High	High	1
High	Master Protein	-1898725419035226580	202	A0A7E6FQN6	insulin-like growth factor-binding protein complex acid labile subunit isoform X7 OS=Octopus vulgaris OX=6645 GN=LOC115225305 PE=4 SV=1	MFQQLKLTFALILSMSFCLESNAASDICSTCSCRNSETNIDCSYRNLFSIPQQIPLNVEVLDFRGNYITEIQVEAFRNLTNLTSLDLESNRVNEIKAETFQNLPSLKTLYLQYNTIVKIAVRAFDELPSLRTLFLSGNKITEINADTFRNLFSLAYIYTGHNNIREVKADTFQNLSSLTYISLSSNYIQEIKADTFRKVTTLTYIDLSDNNITDIEADTFRDLSSLTHLNLSGNDLKKIEGEIFRNLSSLTTLDLGTIGLKNIKPELFQYLSSLKSLYLRGNNLTNIQRDDFKYLPNLEKLYLEKNKIENIQEGTFEAVTSLKNLYLSDNNITYIQRGIFENLPNLQRLVLRNSGIKNYEDGAFLFLPSVNYIDLGNNKDMMCECHLPAILNYTKTILK…	>tr|A0A7E6FQN6|A0A7E6FQN6_OCTVU insulin-like growth factor-binding protein complex acid labile subunit isoform X7 OS=Octopus vulgaris OX=6645 GN=LOC115225305 PE=4 SV=1	0.001	2.728	1	4	2	2	0	2	545	62.2	7.08	3.77	4	2	2	0	0	High	Not Found	Not Found	High	Not Found	Not Found	High	Not Found	Not Found	1
High	Master Protein	7084052242035414874	345	A0A6P7TUI8	uncharacterized protein LOC115225721 OS=Octopus vulgaris OX=6645 GN=LOC115225721 PE=3 SV=1	MKILSICFLLSLALFLGISEKTALPVSSIPSGVYVTTTLDNLDIFTALEKIKNFCDGGNSLRNQINCKGLIVQGEKRNPAIGNLKWKYVFSMPLDSVDLNNLPIPNDRSLKLDFHLGTPRTVSEKCFSGPVPVVQVYQKLIEVYNESQNALQRDWFYMTGFKDLETTSPTFSKLWFDKPPHFRRSKPAPDDSDIPSLCSGKSGYSCPNTTYCLKDNVETRKMSMYIVTGAAKDYAEKNCSYNAAIMDQYMNNFGYFRGQNSLNLTINRTIPVMTKITKQPAQSTCPQKYQMQFYVNKEAPPCPTNPNVLLELLTDMEVYVKAFYGFANNAMDFLYQHFSNDLTSKQLSYVTDQYYLSVFRGHGPTFGQRIEIWILKNPLACSIQQCN	>tr|A0A6P7TUI8|A0A6P7TUI8_OCTVU uncharacterized protein LOC115225721 OS=Octopus vulgaris OX=6645 GN=LOC115225721 PE=3 SV=1	0.001	2.671	1	4	2	2	0	2	387	43.9	8.28	3.67	4	2	2	0	0	High	High	Not Found	High	High	Not Found	High	High	Not Found	1
High	Master Protein	-6394934416467286777	97	A0A812DEV9	Rab GDP dissociation inhibitor OS=Sepia pharaonis OX=158019 GN=SPHA_54563 PE=3 SV=1	MDESYDVIVLGTGLKECILSGMLSVVGKKVLHMDRNKYYGGESASMTPLEELYTKFNMGCPPPEFGRGRDWNVDLIPKFLMANGQLVKTLIRTGVTRYLEFKSVEGSFVYKGNKIHKVPADEREALGSSLMGMFEKRRFRKFLIYVQELDENDPSTWQGLDPHKCCVKELYDKFSLDGGTVDFTGHALSLYLSDDYFNNSAIDIIKRCKLYSDSLARYGKSPYLYPLYGLGELPQGFARLSAIYGGTYMLDKQVDELVMEDGKVVGVKSQGQVAKCKMVICDPSYAPERCKKVGQVVRAICILDHPIPNTNNALSCQIIIPQNQVDRKNDIYVCCVSHAHNVAAKSFYLAIVSTTVETDKPEEELSVGLNLLGCIRQKFVSISDLLEPTDDGTQSQIFI…	>tr|A0A812DEV9|A0A812DEV9_SEPPH Rab GDP dissociation inhibitor OS=Sepia pharaonis OX=158019 GN=SPHA_54563 PE=3 SV=1	0.001	2.645	1	2	1	1	0	1	489	54.9	6.4	2.36	2	1	1	0	0	Not Found	High	Not Found	Not Found	High	Not Found	Not Found	High	Not Found	1
High	Master Protein	-5049669915813801009	130	A0A812CYT6	MYH OS=Sepia pharaonis OX=158019 GN=SPHA_42230 PE=3 SV=1	MVWVPSETHGFIGASVKEEKGDEVIVEVEDTGKRTPFHRDDIQKMNPPKFNKVEDMAELTCLNEASVLHNLKDRYYSGLIYTYSGLFCVVVNPYKKLPIYQDKVIELYRGKKRHEVPPHVFAITDTAYRSMLQDREDQSILCTGESGAGKTENTKKVIQYLAYVAASSRAANNRSSVTSFHGSTKELNLGELENQLLQANPILEAFGNAKTIKNDNSSRFGKFIRINFDMSGYICGANIETYLLEKSRSVRQAEGERSFHIFYQFLSGASAAQKNDFLLEDAKSYHYMSGGPMPVNGVDDVAEFNQTSEAMLVMGLSQDDVNGIFRVVSAVLLFGNMVFRQERNSDQATLPDNTVAQKVCHLLGLNVTALTQAFLRPKIKVGRDHVTKAQTKEQAEYSV…	>tr|A0A812CYT6|A0A812CYT6_SEPPH MYH OS=Sepia pharaonis OX=158019 GN=SPHA_42230 PE=3 SV=1	0.001	2.532	1	1	1	2	0	1	2061	237.4	5.59	2.25	1	2	1	0	0	Not Found	High	Not Found	Not Found	High	Not Found	Not Found	High	Not Found	1
High	Master Protein	4451827783942454164	303	A0A6P7TEC1	spermidine synthase OS=Octopus vulgaris OX=6645 GN=LOC115222533 PE=3 SV=1	MPLENGWFREECDLWSGYSMCLKVDEVLYHEKSKFQDIMVFKSKRFGNVLVLDGLVQCSEKDEFAYQEMIANIPLYSHPSPENVLIIGGGDGGVVREVVKHPSVKKVVLCEIDEEVCNVSKKYLPGMAVGLSHPKLELCIADGVEYLEKCEGKFDVIITDSTDPVGPAEGLFELRFYKLIHKALKPDGIMCNQGENIWLDKELIQDVLKKCRAVFPCVSYANCTLATYACGQIGLVLCSNTMRDLSKPVRTLTEDEVEANDYKYYNSAVHSASFVLPNFAHKAFGLPIKS	>tr|A0A6P7TEC1|A0A6P7TEC1_OCTVU spermidine synthase OS=Octopus vulgaris OX=6645 GN=LOC115222533 PE=3 SV=1	0.001	2.513	1	4	1	1	0	1	290	32.5	5.43	1.76	4	1	1	0	0	Not Found	High	Not Found	Not Found	High	Not Found	Not Found	High	Not Found	1
High	Master Protein	5736067117204893133	327	Cluster-58773.6509;orf1 len=104 frame:2 start:2 end:313 sp	P11221 OPRI_PSEAE Major outer membrane lipoprotein OS=Pseudomonas aeruginosa (strain ATCC 15692 / DSM 22644 / CIP 104116 / JCM 14847 / LMG 12228 / 1C / PRS 101 / PAO1) GN=oprI PE=3 SV=1	GQFLFSERWLFNRKSLKGNTMNNVLKFSALALAAVLATGCSSVSKETEARLTATEDAAARAQARADEAYRKADDALAAAQKAQQTADEANERALRMLDKASRK	>Cluster-58773.6509;orf1 len=104 frame:2 start:2 end:313 sp|P11221|OPRI_PSEAE Major outer membrane lipoprotein OS=Pseudomonas aeruginosa (strain ATCC 15692 / DSM 22644 / CIP 104116 / JCM 14847 / LMG 12228 / 1C / PRS 101 / PAO1) GN=oprI PE=3 SV=1	0.001	2.491	1	10	1	1	1	1	103	11.2	9.48	2.54	10	1	1	0	0	High	Not Found	Not Found	High	Not Found	Not Found	High	Not Found	Not Found	1
High	Master Protein	-7893238433691065088	52	A0A6P7SKQ5	tropomyosin-2 OS=Octopus vulgaris OX=6645 GN=LOC115213976 PE=3 SV=1	MEACKKKMNALVADRVNALEKAEELELRLKQVEEERDKIQDDYMFLQKKYGTLEKENDDLNESLAKYQLVEEDKKKVDEELVWMHKKYSNLQREFDEVSVQLDKAQDMMRYTEEKLSETESETQDLNRKINLLELDLTRSESQVEEKRVQAEEDSEKLQSAENRALTAERNVQKLENDIEKLTKELEVEQKKFKTLCEDLDEACSQMMDYVNTQLLYLVLVRITFSYDTQILRYTIQAAFIIIVSVNMEACKKKMNALILERVNALEKAEDISNKYQQLEEEKKKVDDELAWLQKKHGNLERDFDELTGQLEKTQDLLRYTEEKLSETESETQDLNRKINLLESDLTRSEGLLEEKRVQAEDDSTKLQSAESRALEAERNVEKLENDIDKLTKELGDEQ…	>tr|A0A6P7SKQ5|A0A6P7SKQ5_OCTVU tropomyosin-2 OS=Octopus vulgaris OX=6645 GN=LOC115213976 PE=3 SV=1	0.001	2.477	1	6	1	1	0	1	418	49.2	4.69	2.51	6	1	1	0	0	Not Found	High	Not Found	Not Found	High	Not Found	Not Found	High	Not Found	1
High	Master Protein	-5444268960612338830	117	A0A6P7T124	Cytidine deaminase OS=Octopus vulgaris OX=6645 GN=LOC115218070 PE=3 SV=1	MAETSPKIKSLIQAAAEAKEKAYCPYSNFRVGAALLTEDDTIITGCNVENCSYGGTICAERTAMVKAVSEGKKSFKAIAVASDKKDKIAPCGICRQFMAEFGTDWDVYLTSNDGSFEKMTVSQLLPLAFQPSHLK	>tr|A0A6P7T124|A0A6P7T124_OCTVU Cytidine deaminase OS=Octopus vulgaris OX=6645 GN=LOC115218070 PE=3 SV=1	0.001	2.47	1	7	1	1	0	1	135	14.6	6.99	2.51	7	1	1	0	0	Not Found	Not Found	High	Not Found	Not Found	High	Not Found	Not Found	High	1
High	Master Protein	-5037267277739309807	131	A0A6P7S965	ras GTPase-activating protein-binding protein 2 OS=Octopus vulgaris OX=6645 GN=LOC115210285 PE=4 SV=1	MVMEEPCPQWVGREFVRQYYTIMNEAPNFLHRFYSNNSSFVHGGIEKVGEEQQPVVGQDNIHKKILSLNFSDCRTKIRQVDSQFTVSNAVLIQVTGELSNYGQPMRRFMQTFVLAPQSPKKYYVHNDIFRYQDEVFPDSESDVENFESGGSEQENTETVTQTGPIQESVSQYYEPPSVLSNGNADIDEGPDSPAEKSVEEEPKEEVVEEPVSEPEKELEIKTPEPEPVPEAPVEPKPVSWASLASKNAPPSQPSTTSAGPAGHAQPLGKTQATRSDVKLDMNQGPQPQRARNPRERIRERERTSASRTDDGDSDSLSGRRGSRYPDSHQLFVGNLPHNITEKELRTYFENYGRVVELRINTKSGGGKLPNFGFVVFDTAEPVQHILSVKPIKYNGEHRL…	>tr|A0A6P7S965|A0A6P7S965_OCTVU ras GTPase-activating protein-binding protein 2 OS=Octopus vulgaris OX=6645 GN=LOC115210285 PE=4 SV=1	0.001	2.459	1	3	1	1	0	1	486	52.9	6.06	3.35	3	1	1	0	0	Not Found	High	Not Found	Not Found	High	Not Found	Not Found	High	Not Found	1
High	Master Protein	-6980872418728307282	75	A0A0L8G235	Malate dehydrogenase OS=Octopus bimaculoides OX=37653 GN=OCBIM_22001700mg PE=3 SV=1	MSNPIKVLVTGAAGQIAYSLLFNVAKGNIFGADTPISLVLLDIEPMMQVLDGVVMELKDCALPLLKEITSTASLDVGFKDIDVALLVGAMPRREGMERKDLLASNVKIFKSQGQALDKYAKKSVKVVVVGNPANTNALICMKYAPSIPPQNFSALTRLDQNRAQYQIATKCGVSAQDVHNVIIWGNHSSTQYPDVSHATVKLSSETKSVKEAVKDDKYLKNDFLKCVQERGAAVIKARKLSSAMSAAKAICDHVHDWWHGVPSGTYVSMAVCSDGSYGIEKGLIFSFPVITKPDHSYEIVKDLAIDDFSRSKLDITLKELLDERDLALSVCE	>tr|A0A0L8G235|A0A0L8G235_OCTBM Malate dehydrogenase OS=Octopus bimaculoides OX=37653 GN=OCBIM_22001700mg PE=3 SV=1	0.001	2.454	1	3	1	1	0	1	332	36.2	7.4	1.75	3	1	1	0	0	Not Found	High	Not Found	Not Found	High	Not Found	Not Found	High	Not Found	1
High	Master Protein	-5282569393548330479	121	A0A6P7SVM1	protein-glucosylgalactosylhydroxylysine glucosidase isoform X2 OS=Octopus vulgaris OX=6645 GN=LOC115216968 PE=4 SV=1	MLLVVCLLLLTCLTGQVSATSDSYSSTRGYNGDGLHLGYYQQMLKDKDILLPVDDTVFETDMMPNNTRKHPTVGNGYISTVVLSDTIFMNGLYNGLTLKSHRARIPTVAGIKAAISTKDHTNDKYALNVQHGLFTHVSFVENLGSCVETIYAHRQLKEVLVVEITLERTGNSNKDFEVNLDFNYTSSDDLKSVKETHNVPGLENVKYFHGENIDSEEYDAKEKSVHMLYTNVPSKLVLSNDKKKTFYFLTALGTQKDQVIDAYEKAMEMAKKNVLMNEHANAWLEIWKNGYIDVRGDHNLAQITYAAQYYILSALPSNGTSGDPDFVGLSPTGLAHGIIEDVDYGGHVFWDQDIWMFPPILMFNADLAKVLMKTRTRTLDAARARAAMNGHKGAMYPWE…	>tr|A0A6P7SVM1|A0A6P7SVM1_OCTVU protein-glucosylgalactosylhydroxylysine glucosidase isoform X2 OS=Octopus vulgaris OX=6645 GN=LOC115216968 PE=4 SV=1	0.001	2.448	1	2	1	1	0	1	769	86.6	5.96	2.51	2	1	1	0	0	Not Found	High	Not Found	Not Found	High	Not Found	Not Found	High	Not Found	1
High	Master Protein	-7890963340354508979	53	A0A0L8I519	Sulfotransfer_1 domain-containing protein OS=Octopus bimaculoides OX=37653 GN=OCBIM_22034539mg PE=4 SV=1	MSSTSTVSEVKMRDCEEIKKEIESNAVQFIGNDGEPMLIYQYKGHNFLRIEMASSALSKLHTVKIRPDDILLYTHPGAGSHWMFEVINMVLRESSERISTIKESLLLDWAPIEILESAESPRVLNTHLSIEFLPPELLKDHKIIYLNRNPKAMVVSYYRHVSSSKATEYTGDFPSFFDLYMKGKVPYDDYFKHVQEFYALIKDNPNALIITYEEMQKDLYKVVLHIAKFLDKTISDQLAKSIVDMCSFDKMKSEKTLVSASCVPKDLFKEGGTFYHSGKVDTWKKWLTVEQSERIDAKIQSEFIDKGIIFNF	>tr|A0A0L8I519|A0A0L8I519_OCTBM Sulfotransfer_1 domain-containing protein OS=Octopus bimaculoides OX=37653 GN=OCBIM_22034539mg PE=4 SV=1	0.001	2.432	1	3	1	1	0	1	312	36	6.39	2.53	3	1	1	0	0	Not Found	High	Not Found	Not Found	High	Not Found	Not Found	High	Not Found	1
High	Master Protein	-5525133804337710275	116	A0A0L8G0N4	Prolyl endopeptidase OS=Octopus bimaculoides OX=37653 GN=OCBIM_22003476mg PE=3 SV=1	MRTPLDYLNCIVFIFLCHLQPTCRYDMEFSYPKARRDESVIDDYHGHKVADPYRWLEDPDAEETIAFVDAQNSISHPFIEQCPHRQKIQESLTEKWNFAKYSSPAEHGGSYYYYCNSGLQNQSVLYVQDDLKSEPCVFLDPNSLSEDGTLSISGTAFSEDGSYFAYGLSKCGSDWITIQFKKAPSGEDLPDTLKHVKFSSMAWTHDNKGMFYNRYPVEGKSDGTETTTNLYNKLYYHRLGTDQDEDLLTVQFQNEPKWKIGAEVSVDGKYLLLSPNEGCDPVNRLFYVELDKLPNGITENLPYVKLIDNFDAQYEYITNEGSVFTFLTNLNAPKYKIINIDFQNPDPKNWKTLVEEDKNAVLEWASCVNHNKLVLCYLKDVKNKLYVHRLETGLLEAEI…	>tr|A0A0L8G0N4|A0A0L8G0N4_OCTBM Prolyl endopeptidase OS=Octopus bimaculoides OX=37653 GN=OCBIM_22003476mg PE=3 SV=1	0.001	2.428	1	2	1	1	0	1	734	83.8	6.2	2.67	2	1	1	0	0	Not Found	High	Not Found	Not Found	High	Not Found	Not Found	High	Not Found	1
High	Master Protein	-853415162715897683	222	A0A6P7TDK5	mucin-5AC-like isoform X1 OS=Octopus vulgaris OX=6645 GN=LOC115222921 PE=4 SV=1	MEKMSRLLIFVAAITLALVCVANSKVLAQTGAPDVTADWCYCNETSEHCKPCKAGDFIGDQTDATKFYKCGTSECFETFHCPDHTIWSQKNHTCIHAERITVSQYSEKLTDNTTNVTDNTTNVTDYSLPSTDVKSSSQSQDTTTSGGHTTQPAHSTQSPAKETTTGPSHHSTDSPTHWCYCNKTLSEHCKPCKPADFIGDPTDATKFYKCGASECFQTFYCQNHTIWDQKNHTCIHADLTTFMPTLSSYSPDFNRSTPHVTKTPLHSTTSKDLSTPATTEATSSTGHPSSTAVPHTSLPHTDTTEKSTSVISTEHSPSITTARLTTAHLISTTDVHTETTDHKTTHTASTHHDVTTTAHGNHTDDPTQSTSSPGNHSTATPGNHTTPTPGNHTTPTPGN…	>tr|A0A6P7TDK5|A0A6P7TDK5_OCTVU mucin-5AC-like isoform X1 OS=Octopus vulgaris OX=6645 GN=LOC115222921 PE=4 SV=1	0.001	2.411	1	3	1	1	0	1	477	51.3	6.62	2.93	3	1	1	0	0	Not Found	High	Not Found	Not Found	High	Not Found	Not Found	High	Not Found	1
High	Master Protein	-2749675182771125916	176	A0A0L8FTG9	Amine oxidase OS=Octopus bimaculoides OX=37653 GN=OCBIM_22008553mg PE=3 SV=1	MSSAPVDVIVVGGGLSGLSAAKLLHDHGLSVKLLEARDRVGGRTFTIYNKDVDYEDLGGAYVGPTQNRLLRMAREFNIKTHLVNEKEDSVFYSSGHTKRFRGTFPKMNFLAWLDANNLFRTMDKMAEEIPISEPWKAPKAQLWDKMTLKDFYNETIWTKTCRDFAELFLRVNVTCEPYECSLLWFLNYVQKCGGTNRIFSTTNGGQERKFVGGSQQVSKAIAKYLGDKVLLEHPVVSIDQSGNHVVIRDLKGREFHVSVLLFNSLSV	>tr|A0A0L8FTG9|A0A0L8FTG9_OCTBM Amine oxidase OS=Octopus bimaculoides OX=37653 GN=OCBIM_22008553mg PE=3 SV=1	0.001	2.393	1	4	1	1	0	1	267	30.2	8.6	1.86	4	1	1	0	0	Not Found	Not Found	High	Not Found	Not Found	High	Not Found	Not Found	High	1
High	Master Protein	-6723975921669911079	83	A0A0L8HNM9	Uncharacterized protein (Fragment) OS=Octopus bimaculoides OX=37653 GN=OCBIM_22010506mg PE=4 SV=1	TESVPETEYWIDRPYAEQIEIISETITRGEKRSKVEAAHEKPSEIESTVEVVTEKVTRTETRSEVESAVDIVTQEERPREQPSQVDATVEIITETESRIEKPSEIESTVEVVTEKVTRTETRSEVESTVDIVTQEERPREIVTETESRVEKPSEIESTVEVVTEKVTRTETRSEVESTVDIVTQEERAKEQPSQVDATVEIVTETESRIEKPSEIESTV	>tr|A0A0L8HNM9|A0A0L8HNM9_OCTBM Uncharacterized protein (Fragment) OS=Octopus bimaculoides OX=37653 GN=OCBIM_22010506mg PE=4 SV=1	0.001	2.386	1	8	1	1	0	1	219	24.9	4.37	2.43	8	1	1	0	0	Not Found	High	Not Found	Not Found	High	Not Found	Not Found	High	Not Found	1
High	Master Protein	-7573392447357053611	62	A0A6P7SMT0	dehydrogenase/reductase SDR family member 4 isoform X1 OS=Octopus vulgaris OX=6645 GN=LOC115214531 PE=4 SV=1	MCYVLYTCAYTLAYTYYIRAWRSGYEVHFVIKKPHHPEFELTAWNLRIGFAIAKRLAEDGAKVMVSSRKAAKVDEAVSSLTSKSLDVAGTVCHVAKPEDRKKLVEETLAKFGGLDILVNNAGINPVFGPVLDTSEDAWDKIFEANVKAPFLFCKDVAPLMEKRGGGSIIFVSSILGYHPEAFLGCYSVSKTALLGLVKVLVPQLNAMNIRVNSIAPGLIDTKFSQMLKSDESILARIPMNRYGTPEECANVVSFLVSEEASYITGETFKVTGGMMSSL	>tr|A0A6P7SMT0|A0A6P7SMT0_OCTVU dehydrogenase/reductase SDR family member 4 isoform X1 OS=Octopus vulgaris OX=6645 GN=LOC115214531 PE=4 SV=1	0.001	2.35	1	4	1	1	0	1	278	30.5	7.69	1.95	4	1	1	0	0	Not Found	High	Not Found	Not Found	High	Not Found	Not Found	High	Not Found	1
High	Master Protein	-2582932853692452347	181	A0A812BGH7	Proteasome subunit alpha type OS=Sepia pharaonis OX=158019 GN=SPHA_15160 PE=3 SV=1	MARRYDSRTTIFSPEGRLYQVEYAMEAIGHAGSCLGILASDGVLLAAERRNVNKLLDEVSYSEKIYNLHDDMACSVAGITSDANVLTNELRLIAQRYLLQYGEPMPCEQLVSALCDIKQSYTQFGGKRPFGVSILYMGWDKHYGFQLYQSDPSGNYGGWKATCIGNNSASAVSMLKQEYKEGETNLEEALRLAIKVLSKTLDMTKLTSEKVEIAKLTREGGKTKIEILSADYVEKLIKKHEEEEDKSEAEKKKEKPTTS	>tr|A0A812BGH7|A0A812BGH7_SEPPH Proteasome subunit alpha type OS=Sepia pharaonis OX=158019 GN=SPHA_15160 PE=3 SV=1	0.001	2.34	1	4	1	1	0	1	259	29	5.99	2.47	4	1	1	0	0	Not Found	High	Not Found	Not Found	High	Not Found	Not Found	High	Not Found	1
High	Master Protein	-2164040952099346611	191	A0A6P7S417	chloride intracellular channel exc-4 OS=Octopus vulgaris OX=6645 GN=LOC115208761 PE=4 SV=1	MSLETKLTIPEFELWIKASVLDKTSKGACPLCQQWYMVAYILAENKLASFKVITVPDSNPPKILREKSSSGLFPVVIGVTGATQDGASVQGLVADESCELEQFFQMFKCPLLKMDSSEQIVALNIFLDLNTTFNRFLSTDSDRRLNEIMSNLNNHLKENETKFMIGDELTYVDCVLLPRLQHVRVAGSILKNYDIPRTMIYLWKYLRNGYEAEAFFNTCPTDPVIISHYQKKVAFRGREASLMKETTTLTIPNDIILDTKSEMEEVDDVEVQDVEVQDVVNNVDELSEMTSNISVENGNGAVDYNYDTGEVNVVSDNTTEVIVHEVHEDTPDTVIVTSDLGNSNHNDSDENPTD	>tr|A0A6P7S417|A0A6P7S417_OCTVU chloride intracellular channel exc-4 OS=Octopus vulgaris OX=6645 GN=LOC115208761 PE=4 SV=1	0.001	2.314	1	3	1	1	0	1	354	39.8	4.55	2.11	3	1	1	0	0	Not Found	High	Not Found	Not Found	High	Not Found	Not Found	High	Not Found	1
High	Master Protein	-3110360765089267205	168	A0A6P7TPC1	uncharacterized protein LOC115224175 isoform X1 OS=Octopus vulgaris OX=6645 GN=LOC115224175 PE=4 SV=1	MSFGIVLLFVTVVSSLVTAAPLNKEVPFNLSSVNQMNFDFSKFSGPWYTIWKSKKFVQNDQVKIKAKEFSSNSRGSISFVETDASENKLHSTPVTGVTKTEKNVTVRIVSTDYNSTALLLYCTNSTESTCRPNHYYFEIASRTRTMEPDDEIRILTEINTVSGRYEEMTYLGADCEGDSAVFDSIPVTSSFSLNNILGNAFALAQTSFTGAKPLLAHSIYLPQINQIVGWFTILSANSDNETECSRVMRSMTKVSPNNSGILYSKIGHIESQNNWSISKTLYSDKHYTLSYFCFEEYNRSCSMNKTEVRLDSRQREIDPNFKTTLFQLLQKVCLTADSMKNIEYKINCSSNLNEVVNKEQMQFKNPVNGVCQKENMPLANYDHGKIQLDGIWYVVAAMN…	>tr|A0A6P7TPC1|A0A6P7TPC1_OCTVU uncharacterized protein LOC115224175 isoform X1 OS=Octopus vulgaris OX=6645 GN=LOC115224175 PE=4 SV=1	0.001	2.203	1	1	1	1	0	1	735	83.2	6.81	1.9	1	1	1	0	0	Not Found	Not Found	High	Not Found	Not Found	High	Not Found	Not Found	High	1
High	Master Protein	-2451985671035884299	183	Cluster-58773.214625;orf1 len=76 frame:-2 start:394 end:167 gi	676443781 ref|XP_009050218.1| hypothetical protein LOTGIDRAFT_226396 [Lottia gigantea]>gi|556110456|gb|ESO99107.1| hypothetical protein LOTGIDRAFT_226396 [Lottia gigantea]	IYPCNMSQTHKFHVDMTCDGCTSAAKRVLSKAENIEKVDVSYETKTVLVTTTQSADYVLEVLKKTGKTVTHVETL	>Cluster-58773.214625;orf1 len=76 frame:-2 start:394 end:167 gi|676443781|ref|XP_009050218.1| hypothetical protein LOTGIDRAFT_226396 [Lottia gigantea]>gi|556110456|gb|ESO99107.1| hypothetical protein LOTGIDRAFT_226396 [Lottia gigantea] >Cluster-58773.214624;orf1 len=76 frame:2 start:302 end:529 gi|676443781|ref|XP_009050218.1| hypothetical protein LOTGIDRAFT_226396 [Lottia gigantea]>gi|556110456|…	0.001	2.182	1	11	1	1	1	1	75	8.3	7.33	1.92	11	1	1	0	0	Not Found	High	Not Found	Not Found	High	Not Found	Not Found	High	Not Found	1
High	Master Protein	-7582531615784511143	61	A0A7E6FJ93	Annexin OS=Octopus vulgaris OX=6645 GN=LOC115223011 PE=3 SV=1	MYPHKIKKHHKKSSSSSSSSSSSSDDEFKHLPKHERKMRKKMKKKMAKNQGYGIYPGMNYPPGTGYPPNPAYPPGSVPPSGPGYPGSVMPGYPQQGFPPAPAGSYPGGQPPYGSSQGYISQQQAGYPPQQAGYPPQQPGYPPQQAGYPPQQPGYPSQQPGYPPSVYPAQPGHQYYNPGSSGNKDNPLPPGFNVPTGGQPSFPPQPYGQSGYPPQASQPGYPPQPSQPGYPPQPSQPGYPAQPGYPAQPSQPGYPAQPSQPGYPAGPAPGGNKPKPLTDDMRKMAMYGGHQVFRPTVVPVNPFSAEEDAKVLRNAMKGFGTDESAIIFIISKRTNSQRQQIAQMFKTMYGKDLIKDLKSELSGNFENVVLAMFKTPAYFDAWSLQEAISGIGTKESVLTE…	>tr|A0A7E6FJ93|A0A7E6FJ93_OCTVU Annexin OS=Octopus vulgaris OX=6645 GN=LOC115223011 PE=3 SV=1	0.001	2.171	1	2	1	1	0	1	619	67.6	9.14	2.02	2	1	1	0	0	Not Found	High	Not Found	Not Found	High	Not Found	Not Found	High	Not Found	1
High	Master Protein	1636366010809091363	260	Q06268	Omega-crystallin OS=Enteroctopus dofleini OX=267067 PE=2 SV=1	MNNNTSVKTMYRKSSSNIPERNSMIFRKSRMYNTMSVQAPLSLGTGVASSISHKGVTDIRCNREKEKKELQDLNERFANYIEKVRFLEAENKTLREALKKSKRDFNIEPIKAMYQAEIDETKKLLDDSSNENGNLKARIGTLEDELEDLRAQLRHVNDMNDQLQNNVDTLNDDISRRIADCEMLRRKVQELEKQLADWKTRHGHLDNQLQGIRIDLQEETAQRLCETNRGQALEEELAFLRDVCENEIKEYKALLAKDSSVPDMREYWTSELGSCLKEIRQEYESQLEALSSSLESRYESQMCEMRLGATKGNAETIQMTEENRRLRAQKSDFENKLRECDSQISQLSNQLRAVTAELEMITSDYDNEKLSHKADVDRLNSELEGVIKELQELMDAKLS…	>tr|Q06268|Q06268_ENTDO Omega-crystallin OS=Enteroctopus dofleini OX=267067 PE=2 SV=1	0.001	2.15	1	2	1	1	1	1	591	67.2	5.34	2.96	2	1	1	0	0	Not Found	High	Not Found	Not Found	High	Not Found	Not Found	High	Not Found	1
High	Master Protein	-8867369288217370482	18	A0A7E6F0K3	phosphonoacetaldehyde hydrolase isoform X2 OS=Octopus vulgaris OX=6645 GN=LOC115215216 PE=3 SV=1	MEIMNSYRYIRQYTGAVKAIILDWSGTTLDRYVMAPAVAFVDVFKKHGVSVSMTEARVPMGLRKDAHIKALTENVDVRQRWKEVHGRFPDQSDVDKMYHDFVPLQLSVLSKYSQLLPGTAETMQKLRKDFNIKIGSTTGYVRSMVDVVLADVAKQGFTPDVTVAGDEVINGCRPKPFMIYRNMDLLDIHPIESVIKVDDTASGVVEALEAGCWGIGVSKYSNYMNIDSLEQEAELTEEALEQRLEHSRTILRNSGAHYVIDSVADLPKVVDDINRRLSLGEKP	>tr|A0A7E6F0K3|A0A7E6F0K3_OCTVU phosphonoacetaldehyde hydrolase isoform X2 OS=Octopus vulgaris OX=6645 GN=LOC115215216 PE=3 SV=1	0.001	2.125	1	3	1	1	0	1	283	31.8	6.05	1.96	3	1	1	0	0	Not Found	Not Found	High	Not Found	Not Found	High	Not Found	Not Found	High	1
High	Master Protein	-6962167644056108962	76	A0A7E6ENY1	titin-like OS=Octopus vulgaris OX=6645 GN=LOC118762203 PE=4 SV=1	MSAPVVSTDLQEITIKETIPTEIVHEEAVSMEPVEKAGVEIKPETKEEMSIQLDVGANPVEKTEVVSINIGKPEKVVTEIKKTEVDIKPETKEEVSIQFDIGAKPVEKTEVISIDIGKPEKPVSEIEMQVAPQLPEVVSIQKEQITIDKKEIIISKEETEVIPEMSTVDIVQESTIQMEAKEMEIKEKKPQLTDITAISTAVMKEKQPEEEVKPVSEIQPIDVSETVIPEKVETAKVTSIITTSTEERKTKISPEKISDIPVEMVLSIDSKKVTSEDQLPMVIKTEQTYTTGEEEVEKEITVQTLEMPLQDTVTVKPVEETDVTDMVVEISKESEMNPVSKEVKDISEMTIISAPSVSVVSTAEEELSEEEFFDIPSTEEKKVEPKEVSDEEKDTSVSV…	>tr|A0A7E6ENY1|A0A7E6ENY1_OCTVU titin-like OS=Octopus vulgaris OX=6645 GN=LOC118762203 PE=4 SV=1	0.001	2.085	1	3	1	1	0	1	2884	322.6	4.41	0	3	1	1	0	0	Not Found	High	Not Found	Not Found	High	Not Found	Not Found	High	Not Found	1
High	Master Protein	7990749849953633144	354	A0A6P7SZG0	cAMP-regulated phosphoprotein 19 OS=Octopus vulgaris OX=6645 GN=LOC115217970 PE=3 SV=1	MSSETGGTAVSSAAAGMSRVESSSTVREDNTNNTSSVDSTGPHADTQKQPQGKNVIEHQEEAKLKAKYPNLQIKGGGSALLQKRLQRGFQYFDSGDYNMAKAKQNNPSAPLPALEKRYFQDSFGEPIPKPPKPENLPPKKPHCQTSKLASDTAATASSPSPL	>tr|A0A6P7SZG0|A0A6P7SZG0_OCTVU cAMP-regulated phosphoprotein 19 OS=Octopus vulgaris OX=6645 GN=LOC115217970 PE=3 SV=1	0.001	2.068	1	13	1	1	0	1	162	17.3	9.13	0	13	1	1	0	0	Not Found	High	Not Found	Not Found	High	Not Found	Not Found	High	Not Found	1
High	Master Protein	-8086510178069642483	47	A0A7E6EY56	Receptor expression-enhancing protein OS=Octopus vulgaris OX=6645 GN=LOC115213373 PE=3 SV=1	MVAINAQPAASSYLAKFEKALHEKNAVTDLLAKVEAKSGVRRLYIAYGIIGFVSLYLMVGYGGDFLCNLIGFCYPAYKSIKAIESARKDDDTQWLMYWVVFSVFSLVEFFANLVLFWVPFYWFLKLQVKCGFMLWCMAPIPHNGSDMIYNKIIKVFFLKHEASLDDAISSINQTADEVKKNLSKAATDAAADYAADAMKGEKAE	>tr|A0A7E6EY56|A0A7E6EY56_OCTVU Receptor expression-enhancing protein OS=Octopus vulgaris OX=6645 GN=LOC115213373 PE=3 SV=1	0.001	2	1	4	1	1	0	1	204	22.9	7.28	2.48	4	1	1	0	0	Not Found	High	Not Found	Not Found	High	Not Found	Not Found	High	Not Found	1
High	Master Protein	-8213900677438581707	41	A0A6P7T976	H(+)-transporting two-sector ATPase OS=Octopus vulgaris OX=6645 GN=LOC115221352 PE=3 SV=1	MDKLPKIRDVEKEKLYGYVYAVSGPVVTAQDMSGAAMYELVRVGHSELVGEIIRLEGDMATIQVYEDTSGVTVGDPVLRTGKPLSVELGPGIMGSIFDGIQRPLEDISDLTDSIYIPKGVNTPALDRSKKWEFEPQNVKFGSHVTGGDIYGVIYENILIKHKLMLPPRSKGKVTYIAEPGMYDCSDVVLETEFDGEKTKYTMLQVWPVRQLRPTADKLAANYPLLTGQRVLDALFPCVQGGTTAIPGAFGCGKTVISQSLSKFSNSDVIIYVGCGERGNEMSEVLRDFPKLTMEVAGNPESIMKRTALVANTSNMPVAAREASIYTGITLSEYFRDMGYNVSMMADSTSRWAEALREISGRLAEMPADSGYPAYLGARLASFYERAGRVKCLGNPAREG…	>tr|A0A6P7T976|A0A6P7T976_OCTVU H(+)-transporting two-sector ATPase OS=Octopus vulgaris OX=6645 GN=LOC115221352 PE=3 SV=1	0.001	1.994	1	2	1	1	0	1	615	68.5	5.36	3.33	2	1	1	0	0	Not Found	High	Not Found	Not Found	High	Not Found	Not Found	High	Not Found	1
High	Master Protein	-8682985967316882986	25	A0A0L8GC35	N-acyl-L-amino-acid amidohydrolase OS=Octopus bimaculoides OX=37653 GN=OCBIM_22036825mg PE=3 SV=1	MGSETERRNPSAEHQAVTNFRRYLRIKTVQPEPDYDGAIKFLKEMAGELGLPYKVIEVSPGNPVFVMTVEGKDPSLPSLMLNSHIDVVPVDMDCWKVDPFSAEKMENGDIYARGSQDMKCVGIQYIEAIRQLLKDGKKMLRNVHLTFMPDEEVGGKLGMQLFIKREEFKQMNIAFALDEGLANPTEHFTIFYGERSAWWAKIKCPGNPGHGSRFIENTAAEKFRNIINKLLSLRDEEEKRLKSNPNLVLGDVTSVNLTMVEGGLQHNVVPSRFTVCFDIRVPPSVDPVQFEEKLNNLCKEAGEGLTLEYVQKGCDNKLTSIDDGNIWWKTFSSTFENMNLKIKTEIFPAGTDIRYLRELGYPALGFSPMNFTPILLHDHNEFLNENIFLKGIDIYYNLI…	>tr|A0A0L8GC35|A0A0L8GC35_OCTBM N-acyl-L-amino-acid amidohydrolase OS=Octopus bimaculoides OX=37653 GN=OCBIM_22036825mg PE=3 SV=1	0.001	1.949	1	3	1	1	0	1	406	46.1	5.77	1.79	3	1	1	0	0	Not Found	Not Found	High	Not Found	Not Found	High	Not Found	Not Found	High	1
High	Master Protein	-7347990110796671312	64	A0A6P7TDD8	guanine nucleotide-binding protein subunit beta-like protein OS=Octopus vulgaris OX=6645 GN=LOC115222872 PE=3 SV=1	MTEQMTLRGTLKGHGGWVTQIATNPINQDNIVSASRDKTLILWQLTKDEQHQYGYAKKSLKGHNYFVSDVVMSSDGNFALSSSWDKTLRLWDLNQSMMTRSFVGHNRDVLSVSFSSDNRQIVSGSRDKSIKLWNTLGVCKYTITEEGHADWASCVRFSPSTTHPIIVSCGWDKIVKVWNLTNCKLKTNHHGHAGFLNTVTVSPDGSLCASGGKDGQAMLWDLGEGKHLYTLDGGDTINALCFSPNRYWLCAATGPSIKIWDLEGKNVVDELRPEVITQSTKSQPNCMSLAWSADGQTLFAGYTDNNIRVWQVSTAAR	>tr|A0A6P7TDD8|A0A6P7TDD8_OCTVU guanine nucleotide-binding protein subunit beta-like protein OS=Octopus vulgaris OX=6645 GN=LOC115222872 PE=3 SV=1	0.001	1.942	1	5	1	1	0	1	317	35.2	7.93	2.47	5	1	1	0	0	Not Found	High	Not Found	Not Found	High	Not Found	Not Found	High	Not Found	1
High	Master Protein	-8929959235909879075	11	A0A0L8GMT0	PKS_ER domain-containing protein OS=Octopus bimaculoides OX=37653 GN=OCBIM_22031489mg PE=4 SV=1	MPGDSSDDTTTSAQSKEATSTEDPAKTETPAPKEMKAVVLTGFGGLKMVKIQTKPQPIAGEGQVLIRVKACGVNFLDLVLRQGVIDNPPKTPVIMGYECAGVIEAIGEKVEGINVGDNVIALSEGQCWAEFASVPVKYVYKMPEGMSFHDAAAIAMNYLTAYILLFDIGNLRAGQSVLAHCIAGGVGQAIIQLSKTVDNVTLYGTASAHKHESLKDKVTHVYDHSLDYTQEIRKISPEGVDIVMDCLCGDDTNKGISLLKPMGRYILFGTSSVVTGETKSFFSFAKSWWQVDKISPLKLYDDNKFLAGFQLRQLLFRDNQHAYIQSQMDKLFKLYTDGIIKPVIDQVACFEDIAEAMQRLHDRKNIGKIILDPTVEPKGKSQAADEVKAPSESSATTVA…	>tr|A0A0L8GMT0|A0A0L8GMT0_OCTBM PKS_ER domain-containing protein OS=Octopus bimaculoides OX=37653 GN=OCBIM_22031489mg PE=4 SV=1	0.001	1.935	1	4	1	1	0	1	437	47.4	5.07	2.05	4	1	1	0	0	Not Found	High	Not Found	Not Found	High	Not Found	Not Found	High	Not Found	1
High	Master Protein	-4658984854526813335	140	A0A6P7SUN7	hydroxyacylglutathione hydrolase, mitochondrial isoform X1 OS=Octopus vulgaris OX=6645 GN=LOC115216426 PE=3 SV=2	MTKNSDLVNFPKVHPPPARVVSAHIFLHINFLQHPPATLPQKLSGTLQGQRAKFHSHPLTVSRPNMKIKLLPALQDNYMYLLIDEATKLCAAVDPVDPKLIMSAVQDEGVSLTTVLTTHHHWDHAGGNEGLVKLAPGIDVFGGDDRIPALTNHVSHGDELKLGSLNIKCLHTPCHTTGHICYFVTSNDEHQPAVFTGDTLFIGGCGRFFEGTANQMYDALVNILAALPKNTNVFCGHEYTVNNLKFAAHVEPQNEAVQEKILWAKEQRSQSKPTIPSTIGDELLFNPFMRVREASLQKYANLTDPIEVMKFIRIKKNDFKG	>tr|A0A6P7SUN7|A0A6P7SUN7_OCTVU hydroxyacylglutathione hydrolase, mitochondrial isoform X1 OS=Octopus vulgaris OX=6645 GN=LOC115216426 PE=3 SV=2	0.001	1.918	1	5	1	1	0	1	321	35.6	7.46	3.56	5	1	1	0	0	Not Found	High	Not Found	Not Found	High	Not Found	Not Found	High	Not Found	1
High	Master Protein	2352041156633884228	272	A0A6P7TES8	uncharacterized protein LOC115222385 OS=Octopus vulgaris OX=6645 GN=LOC115222385 PE=3 SV=1	MSWEAWAPHLKQTQSGFEAANECGIYSLQGDPWYSSNEQLSAKTIKDLREMFSSTCDMSSVEFRETKYFKIRVDENIARFKHATKGGLVVGLGNECIIIAECGTESSLLSNSVVSVEYVLTQLNNTQISQ	>tr|A0A6P7TES8|A0A6P7TES8_OCTVU uncharacterized protein LOC115222385 OS=Octopus vulgaris OX=6645 GN=LOC115222385 PE=3 SV=1	0.001	1.918	1	8	1	1	1	1	130	14.5	5.03	2.3	8	1	1	0	0	Not Found	High	Not Found	Not Found	High	Not Found	Not Found	High	Not Found	1
High	Master Protein	-8129197130733095944	45	A0A0L8G659	IF rod domain-containing protein OS=Octopus bimaculoides OX=37653 GN=OCBIM_22000068mg PE=3 SV=1	MTTVTQKKTEITTSSTSYEDGKSLPRSGYIYTSRIVPRGTVTTRASRSSGNINSGVYHTYDLSASIPVSGAFNLTSTSVHNVKANREREKQDLRDLNERFANYIEKVRFLEAQNKKLAGELEELKSKWGKETSAIKEMYETELEEARKLIDATNKEKVTLDVRVTELIDQLERQQKELEELRSFHQSDQEQIARQNQQLADLEGEISMLRRSIESLEKEKMRQSSILTRMNDEMEKLRMDLNNETINHLDAENRRQTLEEELEFQKDLHAQELKELAALAYRDTTAENREFWRNELSQAIRDIQQEYDAKCDQMRGDMEAYYNLKVQEFRTGATKQNMEVTRNKEENVKLKSNMNEIRNRLTDLEARNAQLERTNQDLMRELEEKDRQNELESSQYKEE…	>tr|A0A0L8G659|A0A0L8G659_OCTBM IF rod domain-containing protein OS=Octopus bimaculoides OX=37653 GN=OCBIM_22000068mg PE=3 SV=1	0.001	1.913	1	1	1	1	0	1	2392	259.4	5.27	2.9	1	1	1	0	0	Not Found	High	Not Found	Not Found	High	Not Found	Not Found	High	Not Found	1
High	Master Protein	-1663896473260649921	207	A0A7E6FLF6	leukotriene A-4 hydrolase-like OS=Octopus vulgaris OX=6645 GN=LOC115223638 PE=3 SV=1	MAAGKSLSDDTKQMKEIEINNKHLKKHNALFEKDGDRLRLLQPTEAVQRAEKRKLECNLSADRNIWRRFIGEANCIPFVNCKASQTGRLTVGIEYETSPDSSALFWLSPLQTAGKQHPYLYSQCEPIHARSFVPCQDSPGVKFPYTAKVTVLKEFVVLMSALQQSSNVCRSNSSKMEFFFKQPVPIPSYLIAIVVGDLASRNIGPRSKVWSETEFLDKAAFEFSETEEMLKVAENLMGPYVWSQYDLVVLPPSFPYGGMENPCLTFVTPTLLAGDKSLANVIAHEISHSWTGNLVTNSTFEHFWLNEGHTTFVERKICAKLGCGEPLRNLLGMIGKKSWADYVNNPNTKPNFTRLVPELKGVSPDDSFSSVPYEKGYALLYYLEDLVGGPEVFEPFLKA…	>tr|A0A7E6FLF6|A0A7E6FLF6_OCTVU leukotriene A-4 hydrolase-like OS=Octopus vulgaris OX=6645 GN=LOC115223638 PE=3 SV=1	0.001	1.9	1	2	1	1	0	1	602	68.7	6.93	3	2	1	1	0	0	Not Found	High	Not Found	Not Found	High	Not Found	Not Found	High	Not Found	1
High	Master Protein	-2682576770137409930	178	A0A0L8GSS4	AAA domain-containing protein OS=Octopus bimaculoides OX=37653 GN=OCBIM_22029167mg PE=3 SV=1	MEEIGITVTEKEDSVVSESRPGTAQTIPHYDPLALDNEDLYVKYKRLQRQLEFLEVQEEYIKDEQKNLKKEYLHAQEEVKRIQSVPLVIGQFLEAVDQNNGIVGSTTGSNYYVRILSTIDRELLKPSASVALHKHSNALVDVLPPEADSSITMLQPDEKPDVTYSDIGGMDIQKQEVREAVELPLTHFELYKQIGIDPPRGVLMFGPPGCGKTMLAKAVAHHTTAAFIRVVGSEFVQKYLGEGPRMVRDVFRLAKENAPAIIFIDEIDAIATKRFDAQTGADREVQRILLELLNQMDGFDQTVNVKVIMATNRADTLDPALLRPGRLDRKIEFPLPDRRQKRLIFSTITGKMNLSEEVDLEDYVARPDKISGADINAICQEAGMQAVRENRYVVLAKDF…	>tr|A0A0L8GSS4|A0A0L8GSS4_OCTBM AAA domain-containing protein OS=Octopus bimaculoides OX=37653 GN=OCBIM_22029167mg PE=3 SV=1 >tr|A0A6P7SHR1|A0A6P7SHR1_OCTVU 26S proteasome regulatory subunit 6B OS=Octopus vulgaris OX=6645 GN=LOC115213143 PE=3 SV=1	0.001	1.894	1	3	1	1	0	1	418	47.3	5.31	2.1	3	1	1	0	0	Not Found	High	Not Found	Not Found	High	Not Found	Not Found	High	Not Found	1
High	Master Protein	-5673651773490312537	112	A0A6P7T7I9	60S ribosomal protein L17 OS=Octopus vulgaris OX=6645 GN=LOC115220375 PE=3 SV=1	MTRYSSEPENLSKSAKARGSLLRVHFKNTRETAQAIKRMHLKRATRYLKNVMEKKEIVPFRRFCGGVGRHAQAKQWKATQGRWPKKSAKFLLQLLKNAESNAEFKGLDTDHLVIEHIQVNQAPKMRRRTYRAHGRINPFMSSPCHIEVILTEKEIPVPKPAGSEDEPVRKKVSQKKLKKQKLMMRD	>tr|A0A6P7T7I9|A0A6P7T7I9_OCTVU 60S ribosomal protein L17 OS=Octopus vulgaris OX=6645 GN=LOC115220375 PE=3 SV=1	0.001	1.885	1	5	1	1	0	1	186	21.6	10.59	1.7	5	1	1	0	0	Not Found	High	Not Found	Not Found	High	Not Found	Not Found	High	Not Found	1
High	Master Protein	-2754238456069634966	175	A0A0L8GW99	Uncharacterized protein OS=Octopus bimaculoides OX=37653 GN=OCBIM_22026800mg PE=3 SV=1	MATTCLLRYVQKAYSRVPARAFSSLVDLPDTHKMLQETCHGFAEKELMPVAAEIDKSKKFPAEQIKKLGDLGLLAITVPSEDGGTGLDTLAYAIAMEEISRGCATCGVIMSVNNSLYLAPIKDFGNSSQKKEFISPYINGDKIGCFALSEPGNGSDAAAASTVAHLHGDHWVLNGTKSWITNGYEASASIVFATTDKAKKHKGISAFIVPTSSEGFSRGKREDKLGIRGSSTCNLIFEDCKIPKENILGPEGSGFKIAMQVLDAGRIGIAAQAVGIAQAAMDCAVAYSLKREAFGAPIAKLQAIQMKLADMASKIDSSRLLLWRAAMLKDAKRPYSKESAMAKLVASEAATAVSHQAIQVLGGMGYVSDMPAERHYRDARITEIYEGTSEIQRLVIAGS…	>tr|A0A0L8GW99|A0A0L8GW99_OCTBM Uncharacterized protein OS=Octopus bimaculoides OX=37653 GN=OCBIM_22026800mg PE=3 SV=1	0.001	1.851	1	2	1	1	0	1	409	43.9	8.07	1.67	2	1	1	0	0	Not Found	Not Found	High	Not Found	Not Found	High	Not Found	Not Found	High	1
High	Master Protein	-8247718293579329636	37	A0A7E6FNE1	dystrophin isoform X4 OS=Octopus vulgaris OX=6645 GN=LOC115232614 PE=4 SV=1	MADEEEENEREDIQKKTFTKWINSQLSKADRPVVNDLFKDLSDGCNLLSLLEVLSGETLKRERGCLRVHHINNVNRALYILEKNYNIKLVNISSNDIVDGNCKLILGLVWSIIVHWQVKDVMKDAMGELQQSNLEQMLLEWCKEITKDYDKVELKNFTTSWKDGLAFNALIHKHRSELFSYDDLLDKDNYYNLSHAFNIAHQHLNIDPLLDPEDVNVDNPDKKCIIMYIMCLFQVLQNSSNNSSNETNTKLDSVKNLQAETTLISSSPKSIDEHSVPTQPAATVTTESSSSLTVEEDMNKISAKCMDKTHNEALNPAAAESLMSLSSGSSSTSSRHSTMSTSSLDLLSYQDMLENVLAWLLEAEEVIAKQEPVVETIAHSADDDASDMLGVTKVKQQFN…	>tr|A0A7E6FNE1|A0A7E6FNE1_OCTVU dystrophin isoform X4 OS=Octopus vulgaris OX=6645 GN=LOC115232614 PE=4 SV=1	0.001	1.782	1	0	1	2	0	1	3772	436.6	5.34	3.99	0	2	1	0	0	Not Found	High	High	Not Found	High	High	Not Found	High	High	1
High	Master Protein	4572483815192720870	306	Cluster-58773.104829;orf1 len=394 frame:3 start:15 end:1196 gi	524910869 ref|XP_005110308.1| PREDICTED: calumenin-like isoform X2 [Aplysia californica]	KQRGILVPIASLFNCLFYFSPLLSIREVPSVVFALNRLTFAKKKNWTKTFCFHSLPKGSVIIRETMLSSQEIMKYYSFFLTIFLFATTLCSTIPKPKDRSIDKKLSDLDHETNGIHNPDYDHEAILGKDDAKDFDQLSPEQSKEKLGKIVDKMDKDRDGYVTEEELKNWIKYVQDKYIVNDSNERWKDYEFLDTDKLDWETFKKKTYGFTEEDIKPTDEKAVYKEMITRDKRRWAYADLDKDNHLTKTEFMHFLHPEEADHMRDIVVLETLEDIDKDKDGKVSLEEYITDIYGNEDEDDEDEDDPDWVNEEKEQFHNFRDKNKDGFLDKAEVTEWLIPEEFNHLDTEVSHLVRTSDVDQDGKLSKNEILDKYDLFVGSQATDFGEALKSHDEF	>Cluster-58773.104829;orf1 len=394 frame:3 start:15 end:1196 gi|524910869|ref|XP_005110308.1| PREDICTED: calumenin-like isoform X2 [Aplysia californica]	0.001	1.758	1	2	1	1	0	1	393	46.3	4.88	1.61	2	1	1	0	0	Not Found	High	Not Found	Not Found	High	Not Found	Not Found	High	Not Found	1
High	Master Protein	-6711088968538725196	84	A0A0L8I420	Uncharacterized protein (Fragment) OS=Octopus bimaculoides OX=37653 GN=OCBIM_22037121mg PE=3 SV=1	EKKIPKVPESVLKRRKTRKAQAIKRKANILQKKAKLKKKKITIFHRAEKYVKEYRMQAREEIRLRREARRAGNYYVPSGAKLAFVIRIRGINGVHPRPRKVMQLFRLRQINNGVFVKVNKATLQMIKICEPYITWGYPNLKSVRELVYKRGYGKIEGRRIPLTDNALIERKLGRFGIICMEDLIHEIHTVGKHFKYASNFLWPFKLNNPRGGWVRKYNHYNDGGDFGNRENQINPLLRKMT	>tr|A0A0L8I420|A0A0L8I420_OCTBM Uncharacterized protein (Fragment) OS=Octopus bimaculoides OX=37653 GN=OCBIM_22037121mg PE=3 SV=1	0.001	1.71	1	6	1	1	0	1	241	28.5	10.8	2.21	6	1	1	0	0	Not Found	High	Not Found	Not Found	High	Not Found	Not Found	High	Not Found	1
High	Master Protein	-1224612356087453860	217	A0A6P7TN39	Proteasome subunit beta OS=Octopus vulgaris OX=6645 GN=LOC115223857 PE=3 SV=1	MASTLVSFPHKSGFVFENCRRNAALTNNGITLPHVYKTGTTIAGVIFKDGVVLGADTRATEDTIVADKNCAKIHYMADNIYCCGAGTAADTEMTTQLIASQLELHKLNTGRIPRVCTANRLLKQMLFRYHGMISAALVLGGVDHTGPHLYSIWPHGSTDKLPFTTMGSGSLAAMSVFEERFKTNMTCDEAKRLVQDAITAGIFNDLGSGSNVDLCVITKDKVDYLRPYDQCNKKGQRSGNYKYNRGTTAIQSSSTCKIPIVVLKKKVTGEEMDTS	>tr|A0A6P7TN39|A0A6P7TN39_OCTVU Proteasome subunit beta OS=Octopus vulgaris OX=6645 GN=LOC115223857 PE=3 SV=1	0.001	1.707	1	4	1	1	0	1	275	29.9	8.5	2.57	4	1	1	0	0	Not Found	High	Not Found	Not Found	High	Not Found	Not Found	High	Not Found	1
High	Master Protein	2471837792092420444	274	A0A0L8FMS3	VWFC domain-containing protein OS=Octopus bimaculoides OX=37653 GN=OCBIM_22013879mg PE=4 SV=1	MKTTAATAYTETEGTTTVSPTATTTASPTVISTTAAAGTTTAYATTTASSSAKTTAPTATSVTLSKTTTASPSSTTAKPTTTTATPAPSTMTPSVTTTGATTTTTTASTTVAHTPTVTVSELTSGVTMASSTTAVPQTTYSVSTATTATTTTSPTSATTTTAPSATTGTATTTTVGTTATTIVPSTTTAASTPTVVVSEQTSGVTTEIPTAPSATTTAAPSATTTAAPSATTTAAPSATTTAAPSVTITAAPSATTTAAPSVKTSVTTATTTAAPSATTTAASTATTTASSATTVPSVKTSPATTTTTVAPSATTSVAASATTTAPPSATTSVAPSATTTVAPSATTTAPSVKTSATTAITTTAAPSATTSTATETTSTTAISPTGTSATIGTETTTTA…	>tr|A0A0L8FMS3|A0A0L8FMS3_OCTBM VWFC domain-containing protein OS=Octopus bimaculoides OX=37653 GN=OCBIM_22013879mg PE=4 SV=1	0	1.662	1	2	1	1	1	1	2316	235.1	5.35	2.25	2	1	1	0	0	Not Found	High	Not Found	Not Found	High	Not Found	Not Found	High	Not Found	1
High	Master Protein	2817404591440913106	279	A0A6P7T9M7	Transgelin OS=Octopus vulgaris OX=6645 GN=LOC115221527 PE=3 SV=1	MALRLGPKGMDRAIQSKVLSKYDTSAEQEVRDWVKQLVDEDIGGGPYEVEKQLKSGVTLVKLAEKVIGGTPDDHLPPDAKTCTLKTNASATPFKQMENIETFLRACKAYGVPDNSCFQTVDLFEGRNMAMVIATLLQLGTEAQRRGFSGPVCGPKPTEKHQVNFSEEQLRAGEGIIGLQAGTNKFASQIGMKIGAVRHIADIRADDMNKEGQGVISLQAGTNKFATQSGMSFGAVRHIADIRADEITQDSQGHIXLQSGTNKCASQAGMSGFGAVRHISDIRADDMNAEGHTVIGLQAGSNKGASQKGMSCIGGVRHVADIRCDDITKDAEGMLTLQAGTNQFASQKGMTSFGAVRHIADIRADQYDKESDGSLSLQAGTNKFASQAGMSFGAVRHVAD…	>tr|A0A6P7T9M7|A0A6P7T9M7_OCTVU Transgelin OS=Octopus vulgaris OX=6645 GN=LOC115221527 PE=3 SV=1	0	1.651	1	2	1	1	0	1	438	46.8	7.11	0	2	1	1	0	0	Not Found	High	Not Found	Not Found	High	Not Found	Not Found	High	Not Found	1
High	Master Protein	7144077711833785058	346	A0A0L8HS70	XPGN domain-containing protein OS=Octopus bimaculoides OX=37653 GN=OCBIM_22007405mg PE=3 SV=1	MGVHGLWSLLQPVGKPIRLEALEGKILAIDVSLWLHQAAKGMRDRSGNPIPNAHLIVLFNRVCKLLYYRIKPIFVFDGGVPVLKWQTLAHRREQKETAADKSGEISNKLLHNLLKQQLLNKTIEKNSPKKKGSNSNAEESPSKTVTRLLSSKPHQRDMFELDELPESSQKYFDELNEEDPWDQHHSILDDAGGFASYQMSKLLKQNKITNQIEKVQDEIIARKSGKISTESGIIDQVVNIQKIASEDSSHFIFVKGLQKDTALEVIEKEKRKEEMKGSEDSDEESTKPAPSYKCPDSVNTSGNLWVEEMKYGVKKKPCEELPNIKQEKDFLSSKVKLQVDSDSTCSSQNIFNVDKNILFNWAKLAESGNHSADQTSLGEPENNSSKTLETKVSLSDSES…	>tr|A0A0L8HS70|A0A0L8HS70_OCTBM XPGN domain-containing protein OS=Octopus bimaculoides OX=37653 GN=OCBIM_22007405mg PE=3 SV=1	0	1.646	1	2	1	1	1	1	521	58.1	5.58	2.26	2	1	1	0	0	Not Found	High	Not Found	Not Found	High	Not Found	Not Found	High	Not Found	1
High	Master Protein	-8231193928763006517	40	A0A0L8IH79	Uncharacterized protein OS=Octopus bimaculoides OX=37653 GN=OCBIM_22005008mg PE=3 SV=1	MYRVSSLLRSAAQTLRTPALARCYAKDLKFGPDARVLMLQGVDKLADAVAVTMGPKGRNVIIEQSWGSPKITKDGVTVAKAVELKDKFMNIGAKLVQDVANNTNEEAGDGTTTATVLARSIAKEGFDKISRGANPIEIRHGVMNAVDVVVEQLKNQSRQVTTPEEIAQVATISANGDRSIGDIISSAMKKVGRDGVITVKDGKTLKDELETIEGMKFDRGYISPYFINTSKGAKCEFQDALVLFCEKKISNIQAIIPALELANSQRKPLLIIAEDVDGEALTTLVLNRLKVGLQVCAVKAPGFGDNRKNTLQDMAIASGGVVFGDEGNLSKLEDIQLHDFGVISEVVITKDDSLLMKGKGEKSDIDKRISLIRDEIELSTSDYEKEKLNERLAKLSNGV…	>tr|A0A0L8IH79|A0A0L8IH79_OCTBM Uncharacterized protein OS=Octopus bimaculoides OX=37653 GN=OCBIM_22005008mg PE=3 SV=1	0	1.646	1	2	1	1	0	1	576	61.2	5.53	2.01	2	1	1	0	0	Not Found	Not Found	High	Not Found	Not Found	High	Not Found	Not Found	High	1
High	Master Protein	-8243162067109183746	39	A0A6P7SJ72	Glutamine--fructose-6-phosphate transaminase (isomerizing) OS=Octopus vulgaris OX=6645 GN=LOC115213781 PE=4 SV=1	MCGIFAYLNYLTPVTRKQILNTLITGLKRLEYRGYDSAGIAYEVEGTESEKRAIHIIKKPGKVAALEEEINSTPVDFDVVSTCHIGISHTRWATHGEPNSTNSHPQRSGLNNEFICVHNGIITNYKDLKSFLETKGFHFESETDTETIAKLVKHLYDKHKEDKLTFRELIEMTCQQLEGAYALAFMSTNYPGECVVTRRGSPLLIGIKSNSKLTTDNIPVLYSKGSAKDSDSPDHRGYVQPVQRPTDGTTEFHPSGPNTEVEYFFASDASAIIEHTNKVIFLEDDDVAAVANGCLSIHRIKRNLDDNKVREVITLKMEIQEIMKGNFSSFMQKEIFEQPESVVNTMRGRLNFETNQVILGGIQDFMTEIRRCRRLLFIACGTSYHSALATRQLLEELTE…	>tr|A0A6P7SJ72|A0A6P7SJ72_OCTVU Glutamine--fructose-6-phosphate transaminase (isomerizing) OS=Octopus vulgaris OX=6645 GN=LOC115213781 PE=4 SV=1	0	1.644	1	2	1	1	0	1	687	76.9	6.74	2.21	2	1	1	0	0	Not Found	High	Not Found	Not Found	High	Not Found	Not Found	High	Not Found	1
High	Master Protein	-8716604485871716001	24	A0A6P7UBL9	fatty-acid amide hydrolase 2 isoform X2 OS=Octopus vulgaris OX=6645 GN=LOC115232529 PE=3 SV=1	MEFSRLLIFVLVKLYRWTLLPIFNIIFNVLNSAPPVSVPPVTNPLLLKSATELSKMIRNKEIKCTEVLEAFIERSKLVNPTINSICSNCYEVARQQALEVNEILEQDDIPDEYSEKNAPFLGVPLSVKEAFALTGMPNTSGLVVRKNTIATKDAEVIANLRKSGVIPYVVTNISELCMWYESANNIYGRSCNPYDNRRIAGGSSGGEGCLIGSGASIIGVGSDIGGSIRIPSFFNGIFGHKPSTGIVSNDGQFPNASGQQKELLCVGPMCRYAEDLKPMLRIMAGENAKKLKLDEPVDLEKLKIYYMDNDEGGLFSSSVQPEMKKAVHKVANYFKTKYGTDVEPVRMSQMKYSFEIWCAKLSAKSEDHDPQSTFCYFMTDGQYSINPVTEFLKWVVYQS…	>tr|A0A6P7UBL9|A0A6P7UBL9_OCTVU fatty-acid amide hydrolase 2 isoform X2 OS=Octopus vulgaris OX=6645 GN=LOC115232529 PE=3 SV=1	0	1.607	1	2	1	1	0	1	530	58.6	5.47	0	2	1	1	0	0	Not Found	Not Found	High	Not Found	Not Found	High	Not Found	Not Found	High	1
High	Master Protein	-8789375763332468919	21	A0A6P7TV68	26S proteasome non-ATPase regulatory subunit 6 OS=Octopus vulgaris OX=6645 GN=LOC115229467 PE=3 SV=1	MPQENLEEEGLPKNPDLQLAQSVFLLSTKKYKNDASIAKKIMDKVKEDNMAPFYETVCIAQLGFKLDENLLKKMKETNEKDLKAIDVKIEDAEKNLGETEVRDFMLEKAEYLSRIGDKEGALTQFQKTSDKTVTLGYRLDLVFHLIRIGLFYMDHELITRYLEKAQTLIDEGGDWDRRNRLKVYRGVYCMSIRDFKKAASLFLDTVATFTSYELMDYQTFVTYTVFCCTIALERPKLREQVIKGSEILEVLHSLPNVKSFLFSLYDCQYASFFRILAWVEETMQYDRLLSPHYRYYIREMRIVAYSQLLESYRSLTLAYMAETFGVTVEFIDQELSRFIAAGRLHCKIDKVGGIVETNRPDSKNWQYQATIRQGDILLNRVQKLSRVINI	>tr|A0A6P7TV68|A0A6P7TV68_OCTVU 26S proteasome non-ATPase regulatory subunit 6 OS=Octopus vulgaris OX=6645 GN=LOC115229467 PE=3 SV=1	0	1.575	1	3	1	1	0	1	390	45.5	6.71	2.2	3	1	1	0	0	Not Found	High	Not Found	Not Found	High	Not Found	Not Found	High	Not Found	1
High	Master Protein	12799063375697017	233	Cluster-58773.94617;orf1 len=371 frame:1 start:124 end:1236 gi	405970764 gb|EKC35640.1| E3 ubiquitin-protein ligase TRAF7 [Crassostrea gigas]	VTAAVMAPTFVDLRSDTVTKPSQAMREVIANAEVGDDVLREDPTILALEEKCAKLLGKEKALFVPSGTMANLLSTMSHCQERGLEIIIGDQAHVGICEQGNVAQIAGVFARIIPNQKNGTLDLATLAKTISTGSNAHHCKTKAIYLENTHNSCGGKILPLDYLQKVYNLAQENGIKVHIDGARLMNAAVALGVPASEITKYCDSVSMCFSKGIGAPVGSVLVGTESFISRALRSRKALGGGMRQAGILAAAAIYGLDRAQETITRDHAHAKKLVNGLKNLSSSLVKVEPEEVQTNIMFIEINKDLAFISDLIKRLRTTTDDEVKELGKEIHVGCLNMGQKIRLVTNCNLSEQDIDDAIKKLCYVFSEKNL	>Cluster-58773.94617;orf1 len=371 frame:1 start:124 end:1236 gi|405970764|gb|EKC35640.1| E3 ubiquitin-protein ligase TRAF7 [Crassostrea gigas]	0	1.571	1	3	1	1	1	1	370	39.9	7.4	0	3	1	1	0	0	Not Found	Not Found	High	Not Found	Not Found	High	Not Found	Not Found	High	1
High	Master Protein	-6397093483590300046	96	A0A7E6EL05	uncharacterized protein LOC115232539 isoform X1 OS=Octopus vulgaris OX=6645 GN=LOC115232539 PE=4 SV=1	MENFLGTWKQEAKAENMEALLAITADVTDKEKEQMTNMISKFEISQDGDKYTLVHTTDDPPATKSYVFALGEPLESTDILGRKFKSIFKLVNSNLLTETCSEWTEGVIDISYEITSSDTLKCSIQLKGITSTTIFKKVTS	>tr|A0A7E6EL05|A0A7E6EL05_OCTVU uncharacterized protein LOC115232539 isoform X1 OS=Octopus vulgaris OX=6645 GN=LOC115232539 PE=4 SV=1	0	1.56	1	16	1	1	0	1	140	15.7	4.83	2.7	16	1	1	0	0	Not Found	High	Not Found	Not Found	High	Not Found	Not Found	High	Not Found	1
High	Master Protein	5707289300397751879	326	Cluster-116787.2;orf1 len=297 frame:-3 start:1585 end:695 gi	156313314 ref|XP_001617862.1| hypothetical protein NEMVEDRAFT_v1g225725 [Nematostella vectensis]>gi|156196177|gb|EDO25762.1| predicted protein [Nematostella vectensis]	CWVIPLTPPVLVVNSSPRRPHASQVQKGLTPHARIRNVIAVGSGKGGVGKSTTSVNLAVALQQLGARVGVLDADIYGPSVPAMLGLSGRPESPDNKSIEPLRAFGVDTMSIGYLIEEDTPMIWRGPMATSAMTQLFNDTLWDDLDYLLIDLPPGTGDIQLTLTQKIPLAGAVIVTTPQDIATLDAKKALKMFEKVEVPVLGIVENMAVHTCSNCGHVEHLFGEGGGERMAAQYGVPLLGSLPLQIGIREQGDAGTPITVAQPDSVPAQAYRHAAQRLIEEVGKRPRASIPILSSLL	>Cluster-116787.2;orf1 len=297 frame:-3 start:1585 end:695 gi|156313314|ref|XP_001617862.1| hypothetical protein NEMVEDRAFT_v1g225725 [Nematostella vectensis]>gi|156196177|gb|EDO25762.1| predicted protein [Nematostella vectensis]	0	1.536	1	2	1	1	0	1	296	31.4	6.3	0	2	1	1	0	0	Not Found	Not Found	High	Not Found	Not Found	High	Not Found	Not Found	High	1
High	Master Protein	-8567928088919967974	32	A0A7E6ENU9	tumor protein D52 isoform X12 OS=Octopus vulgaris OX=6645 GN=LOC115209283 PE=3 SV=1	MMAESIGLSSYAIEFDTDIDGDNYYDPLSPPAYDTVTSRDPETPVYQDPVDKERQEKEWQEELSKIDGEILTLRQVLTAKVRRATELKRKLGITPLQEFKQDIQSGFQQLRDSGTGGGASSILAGASSSDLYQKTSAAMKTASEKTTSAISVLGASVSKKFDEMRNSQTFKTVEERVENAYTNVKTSKSIENLKDKLGATEVKSSEEISASSRVKGSKSNQSLNESFQASSEPSTPRSEDNPPLPEEKVPL	>tr|A0A7E6ENU9|A0A7E6ENU9_OCTVU tumor protein D52 isoform X12 OS=Octopus vulgaris OX=6645 GN=LOC115209283 PE=3 SV=1	0	1.523	1	4	1	1	0	1	251	27.5	4.96	1.86	4	1	1	0	0	Not Found	High	Not Found	Not Found	High	Not Found	Not Found	High	Not Found	1
High	Master Protein	2551545979514998886	275	A0A6P7U8T5	Histone H2B OS=Octopus vulgaris OX=6645 GN=LOC115231513 PE=3 SV=1	MRKNTEIRSKTSLYAKSMGACPKLGGEQVSRATAAAIEASIRTFRKRSKTVHNQLGMSKKAMMAMDSFTFDVYDKIKTEASNLVYQNSKATITSREIQTAVRLILPGELAKHAITEGAKAVTKYTNTK	>tr|A0A6P7U8T5|A0A6P7U8T5_OCTVU Histone H2B OS=Octopus vulgaris OX=6645 GN=LOC115231513 PE=3 SV=1	0	1.508	1	7	1	1	1	1	128	14.1	10.13	1.77	7	1	1	0	0	Not Found	High	Not Found	Not Found	High	Not Found	Not Found	High	Not Found	1
High	Master Protein	-5790860170921323900	109	A0A6P7TGU1	actin-interacting protein 1 isoform X1 OS=Octopus vulgaris OX=6645 GN=LOC115223147 PE=4 SV=1	MSYTLKTTFPTLPRTQRGMPIVLGADPKGKYFLYTNGHNVVIRDIENPNSCDMYTEHSGNVMVAKYSPSGFYIASGDDRGKIRIWDTINPEHVLSKEYQPIAGTIKDIAWSPDNKRMLVAGDGKGTFARAFLVDTGSSVGEISGHSKQINSCDYRQMNPFRVVTASEDYSVVMCEGPPFKFTKKIDAHTNFVNCIRYSPNGEKFISGGADGKAFVYDGKNGESIGELGSPAHKGGIYGIAFSPDNSEVLTVSGDKTAKIWDANTYTLVKEFVFGKTLDDMLVSCIWIGNNIITISLSGFITYLDRNCPEKPLRVLKGHNKPITALTTTPDRKLVFSGCSSGHINYWDLVNGLDDRIVGKPHNSQIQDLVVSGDNLISISMDDTIRFTSISSMQYGNASV…	>tr|A0A6P7TGU1|A0A6P7TGU1_OCTVU actin-interacting protein 1 isoform X1 OS=Octopus vulgaris OX=6645 GN=LOC115223147 PE=4 SV=1	0	1.494	1	1	1	1	0	1	596	65.1	7.06	0	1	1	1	0	0	Not Found	High	Not Found	Not Found	High	Not Found	Not Found	High	Not Found	1
High	Master Protein	-1606276113115712360	211	A0A6P7SB76	epidermal retinol dehydrogenase 2 isoform X1 OS=Octopus vulgaris OX=6645 GN=LOC115210961 PE=3 SV=1	MIDWDFVKEIILTILAFYYYLLDGIIRAILPGCFYAKDVAGETVLITGSGSGIGRELALRFAKLGCRMVLWDVNVPGNDATAKAIKELGGSCYQYKVDLGNKDEIYETARKVNEDIGMVHILINNAGIVTGRKFLECPDELIEKTIDVNTMAHFWTVKAFLPAMIKENHGHVVTVASAAGLLGVNSLTDYCASKFAVVGFEESLRFELEVLGKDGVHTTVVCPFYINTGMFNGVKVRFPYLMPILEPGYVSDKIVEAVRCNTHILYIPRLLYYTLGLKGILPHKCISLLARFFGVSTDMEKFKGKLGQKKE	>tr|A0A6P7SB76|A0A6P7SB76_OCTVU epidermal retinol dehydrogenase 2 isoform X1 OS=Octopus vulgaris OX=6645 GN=LOC115210961 PE=3 SV=1	0	1.427	1	5	1	1	0	1	311	34.5	7.39	0	5	1	1	0	0	Not Found	Not Found	High	Not Found	Not Found	High	Not Found	Not Found	High	1
High	Master Protein	-8904138232737634421	16	A0A7E6FD92	insulin-degrading enzyme OS=Octopus vulgaris OX=6645 GN=LOC115219912 PE=3 SV=1	MVSSTIEKTYEDDKFIKSEGDKRKYRGLEVSNGMKILLISDPETDKSAAAIDVHIGDMCDPKDLPGLAHFCEHMLFLGTTKYPQENEYSKFVTNHGGTYNASTSPEHTNFHFEVNPPGLQGALDRFAQFFISPLFTPSATEREVNAVNSEHNKNIQDDNWRLQQLERTVSDPSHDYCRFGTGNKDTLETKPKDRGVDTRDELLRFHEKYYSSNIMTLAVLGKESLDELTAMVLPLFDKVVNKNVEIPVWNEHPCGCEQVKTRVITVPVKDLRNLAIVWPIPDIQAYYKSNPGFYLAHLLGHEGRNSLHAELKAKGWVNTLYVYIKSRVHGFMFFTLAVDLTEDGMDHVNDIVTLTFQYLNMLRKEGPQEWIFKEFQSLSNMTFRFKDKENPRNYVVHLT…	>tr|A0A7E6FD92|A0A7E6FD92_OCTVU insulin-degrading enzyme OS=Octopus vulgaris OX=6645 GN=LOC115219912 PE=3 SV=1	0	1.422	1	1	1	1	0	1	947	109.5	5.71	1.72	1	1	1	0	0	Not Found	High	Not Found	Not Found	High	Not Found	Not Found	High	Not Found	1
High	Master Protein	-4949641838695904061	133	A0A0L8FU30	Uncharacterized protein OS=Octopus bimaculoides OX=37653 GN=OCBIM_22007941mg PE=4 SV=1	MSYAYLFKYIIIGDTGVGKSCLLLQFTDKRFQPVHDLTIGVEFGARMITIDGKQIKLQIWDTAGQESFRSITRSYYRGAAGALLVYDITRRDTFNHLTTWLEDARQHSNSNMVIMLIGNKSDLEARRDVKKEEGEAFAREHGLIFMETSAKTAANVEEAFINTAKEIYQKIQDGVFDINNEANGIKIGPQHSNANTSMPSAGGGGTSGSNCC	>tr|A0A0L8FU30|A0A0L8FU30_OCTBM Uncharacterized protein OS=Octopus bimaculoides OX=37653 GN=OCBIM_22007941mg PE=4 SV=1	0	1.419	1	7	1	1	0	1	212	23.5	6.68	2.23	7	1	1	0	0	Not Found	High	Not Found	Not Found	High	Not Found	Not Found	High	Not Found	1
High	Master Protein	-5095564122939898107	129	A0A6P7SQ23	reticulocalbin-2 isoform X2 OS=Octopus vulgaris OX=6645 GN=LOC115215179 PE=4 SV=1	MTKITMLIMLGLAVLLLTVGVRTEPEKVQHAEHDHYFHEHFKNGAHNPHFDHLAILGSKKAEEEFNELPPDEAKERLTRLIPMMDLNKDGKLVLPELQSWIYNSFKNLDKDEINEEFSSMDTDGDKKVTWEEYVHKFYSYTPEFLKEMKMKGGQENDEILKIIEDDEEKFKVADRNKDGNLDVSEFPAVLHPYDYDFMYDHEIKRALREHDKNGDNKIDLAEYGMDNEMTQSDEAEKIAEKVKFGEFDTNKDGFLDTEEMKPWIIPSTMENSKEEAEHIMGEADTNKDNILTKEEILENFETFVGSQATDYGKHLHLVHEEL	>tr|A0A6P7SQ23|A0A6P7SQ23_OCTVU reticulocalbin-2 isoform X2 OS=Octopus vulgaris OX=6645 GN=LOC115215179 PE=4 SV=1	0	1.406	1	3	1	1	0	1	322	37.6	4.81	2.47	3	1	1	0	0	Not Found	High	Not Found	Not Found	High	Not Found	Not Found	High	Not Found	1
High	Master Protein	-2031442554342805796	196	A0A812BQ89	Transaldolase OS=Sepia pharaonis OX=158019 GN=SPHA_21947 PE=3 SV=1	MYKEDGIDKERILIKLSSTWEGIQAAKILEEKHGIHCNMTLLFNFYQAISCAEAGVTLISPFVGRILDWFVKNTDKKSFEPLEDPGVKSVTKIYNYYKKFGYETVVMGASFRNTGQIVGLAGCDLLTISPKLLEELSKMNTPLQTQLSDSKSKEMNMEKVKVDEKTFRFMMNEDEMATEKLSDGIRRFSADAVKLEKILKAKM	>tr|A0A812BQ89|A0A812BQ89_SEPPH Transaldolase OS=Sepia pharaonis OX=158019 GN=SPHA_21947 PE=3 SV=1	0	1.391	1	3	1	1	0	1	203	23.1	7.81	0	3	1	1	0	0	Not Found	High	Not Found	Not Found	High	Not Found	Not Found	High	Not Found	1
High	Master Protein	4551874174500641919	305	A0A6P7SBT2	Hydroxyacid-oxoacid transhydrogenase OS=Octopus vulgaris OX=6645 GN=LOC115210878 PE=3 SV=1	MVRFFFSREKVSHLMRTVSSKWNIYSPDFVPPRGFQYHGTSTTQPQKEYAFEMACSSVRYGEGATQEVGKDFRNLGSKLICVMTDKGVLKTRAVKVALQSLEDQNLKYKLFTDVKVEPSDESFKTAIDFVKQDNFDAFLAIGGGSTMDTCKAANLYSSDPSADFLDYVNAPIGKGLPITISVKPLIAIPTTTGTGSETTGTAVFGFDKLKAKTGISNRSLRPTLGILDPLNVVSQPERVVAYSGLDILGHALESYTALPYYERAPRASSPELRPAYQGSNPISDVWSQAALQVCDKYLQRAVDNQDDLEAISNLQLASSFAAVGFGNAGVHLCHAISYPIAGLVRDYQAEGYPTDKPIIPHGLSVIITSPAVFSATAMSCPQRHLNGASFLGVDISNKK…	>tr|A0A6P7SBT2|A0A6P7SBT2_OCTVU Hydroxyacid-oxoacid transhydrogenase OS=Octopus vulgaris OX=6645 GN=LOC115210878 PE=3 SV=1	0	1.362	1	2	1	1	0	1	475	51.5	6.93	0	2	1	1	0	0	Not Found	High	Not Found	Not Found	High	Not Found	Not Found	High	Not Found	1
High	Master Protein	-4186029401192206213	156	A0A0L8HXN5	SGL domain-containing protein OS=Octopus bimaculoides OX=37653 GN=OCBIM_22003174mg PE=4 SV=1	MESIPVDEPLFTKVASDVLGSEGPVFDKSGCFYVVAPEVEKNDKPAGQILCVNLKTNKNAILCEPEINGYGGIPAGCQFDRLDNLFVADMRLGLLQVKLNGTYKQVATIDSTGQCMQGCNDCAFDYQGNLWITAPAGDIAPAPYRRSTEEPFGSVYCYTDGEMIKIDTGLKFPNGIAVLHLNDGRPQKLIVAETPTKLLWSYDIEAPGCVSNKKVWATIPGDHEGGADGMDFDDDNNLLVANWGSGHIEVFNSKGGNPIQRIKCPFVKPSNIHFEPRSKTLYVTEHENNAVWKFDWHRNGKMQYCEMNNF	>tr|A0A0L8HXN5|A0A0L8HXN5_OCTBM SGL domain-containing protein OS=Octopus bimaculoides OX=37653 GN=OCBIM_22003174mg PE=4 SV=1	0	1.36	1	5	1	1	0	1	310	34.2	5.14	2.36	5	1	1	0	0	Not Found	High	Not Found	Not Found	High	Not Found	Not Found	High	Not Found	1
High	Master Protein	-7256108740869280428	70	A0A0L8GIJ0	VWFA domain-containing protein (Fragment) OS=Octopus bimaculoides OX=37653 GN=OCBIM_22032938mg PE=4 SV=1	CASAQIDLVFLIDSSGSVEKPDFEKTKTFLKNIVYNLDISPEKTRVAVIRFADTPNVSFFLGDHNTNFAVRNAIDAIIYDGTGTATDTALDKARTSVFTNTRKSVASKVLVLVTDGKSNNENETIAAAEKLKDDGVTIFTIGVVNPKVSELIAAASEPSCTHFINLKGYNETDFIVKKFRSDFCEAHFRCLQQCLEGRCVACDRRIDHDSGSCHGDTCSEAYEKLQKMCGEECMCCTQVYEWFRHFQDDRTNVDIER	>tr|A0A0L8GIJ0|A0A0L8GIJ0_OCTBM VWFA domain-containing protein (Fragment) OS=Octopus bimaculoides OX=37653 GN=OCBIM_22032938mg PE=4 SV=1	0	1.33	1	3	1	1	0	1	257	28.7	5.41	2.02	3	1	1	0	0	High	Not Found	Not Found	High	Not Found	Not Found	High	Not Found	Not Found	1
High	Master Protein	1596983739309909769	259	A0A6P7TAQ3	von Willebrand factor C domain-containing protein 2-like OS=Octopus vulgaris OX=6645 GN=LOC115222123 PE=4 SV=1	MKHSAIVFVLLYCTWGISPIKGIPPTPMVDLEAIESQLDLGTTAAPFDDEDIQGCETEDGFVPIGKTVSKEPCKQCTCTANGDMKCNTTVCPKLNCVDFEDVEDECCPICPNGENCYTPKNVILKAGEVITESDLQCKCKFSEDNLEEPTAHCTEKIEAAAAPPDDI	>tr|A0A6P7TAQ3|A0A6P7TAQ3_OCTVU von Willebrand factor C domain-containing protein 2-like OS=Octopus vulgaris OX=6645 GN=LOC115222123 PE=4 SV=1	0	1.326	1	10	1	1	0	1	167	18.1	4.32	0	10	1	1	0	0	High	Not Found	Not Found	High	Not Found	Not Found	High	Not Found	Not Found	1
High	Master Protein	-4647485713830809765	141	A0A6P7SXS2	cell surface glycoprotein 1 isoform X6 OS=Octopus vulgaris OX=6645 GN=LOC115217577 PE=4 SV=1	MSQLDSLVDLSESQPMTESTGNMDEFDPLCPTSNTEAKDVDGGLLVDLSVETQEKPKENGISNNFDTDYEVKDDEDMSELNEGHIYANSEPLAHPVYENVSVNGKADNDDTYENVMKESGDGQEISVTLKTEESSPLYDTLPSLKKEIDNNNDEDDIVVVSDTMDEMVVHDIEKESKPAEEAASEVTEEDNAIEAEVEIEIPQTQEEEQRKSPSHSRSDSASPTERPASPTPASDEEPHERNVCHSPSPSMSDEETANIAATSEENDSETRRDSMHSPVPTPTPRKRTSLCHGKSPEFDINKEACRSPSPKEPSISSEGRNTRSPSPDDMIIHQEEEIIKNGESQSMSNTNATFTETRCDPNFNAVEADSMEPISPENQQRRDSDESYRVMVGRTEAGI…	>tr|A0A6P7SXS2|A0A6P7SXS2_OCTVU cell surface glycoprotein 1 isoform X6 OS=Octopus vulgaris OX=6645 GN=LOC115217577 PE=4 SV=1	0	1.311	1	1	1	1	0	1	852	94	4.58	2.19	1	1	1	0	0	Not Found	High	Not Found	Not Found	High	Not Found	Not Found	High	Not Found	1
High	Master Protein	-3792375714687778956	159	A0A0L8IEQ2	T-complex protein 1 subunit delta OS=Octopus bimaculoides OX=37653 GN=OCBIM_22015514mg PE=3 SV=1	MPEPVEAKKGKKSEYEDRDKPTQIRFSNINAAKAVVDAIRTSLGPRGMDKMIQASNGDVTITNDGATILKQMQVLHPAARMLVELSKAQDVEAGDGTTTVVVLAGSLLDATAKLLKKGIHPTQISESFQRAAAKCIDILQEISRPLELSDRESLLKSASTALNSKVVSQYSNILAPIAVDAVMKVIDPSIADNVDLNDINIVKKLGGTVDDTELIDGLVFNQKTAGFGGPSRVEKAKIGLIQFCISPPKTNMDNQVVVSDYSQMDRVLKEERQYLLNIVKQIKKAGCTVLLIQKSILRDAVSDLALHFLAKMKIMVIKDIEREDIEFVCKSLGCRPIASLDHFVSESLGSAELVEEVDSGGGKIVKITGIANQGKTVSVLIRGSNKLVLEEADRSIHDA…	>tr|A0A0L8IEQ2|A0A0L8IEQ2_OCTBM T-complex protein 1 subunit delta OS=Octopus bimaculoides OX=37653 GN=OCBIM_22015514mg PE=3 SV=1	0	1.293	1	2	1	1	0	1	531	57.6	7.28	0	2	1	1	0	0	Not Found	High	Not Found	Not Found	High	Not Found	Not Found	High	Not Found	1
High	Master Protein	-2383587510595780583	186	Cluster-86046.0;orf1 len=266 frame:2 start:41 end:838 gi	119552594 gb|ABL84200.1| 14-3-3-like protein [Physarum polycephalum]	ERSEMASSKERENFVYVAKLAEQAERYDEMVEAMKNVANMDVELTVEERNLLSVGYKNVVGSRRASWRILSSIEQKEESRGNEQNVKRIKEYLQKVESELTNICNDIMVVIDQHLIPSCTAGESTVFYHKMKGDYYRYLAEFKAGNDKKEVAELSLKAYQSATTAAEAELPPTHPIRLGLALNFSVFYYEIMNSPERACHLAKQAFDEAISELDSLNEDSYKDSTLIMQLLRDNLTLWTSDLPEDAEDAQKGDATNKAGGGEDAE	>Cluster-86046.0;orf1 len=266 frame:2 start:41 end:838 gi|119552594|gb|ABL84200.1| 14-3-3-like protein [Physarum polycephalum]	0.001	1.269	2	3	1	2	0	1	265	30	4.79	1.61	3	2	1	0	0	Not Found	High	High	Not Found	High	High	Not Found	High	High	1
High	Master Protein	1334457736592941949	252	Cluster-58773.110379;orf1 len=257 frame:1 start:346 end:1116 gi	347972707 ref|XP_320580.4| AGAP011952-PA [Anopheles gambiae str. PEST]>gi|333469693|gb|EAA00684.4| AGAP011952-PA [Anopheles gambiae str. PEST]	TRKTNRFTMAATASSPVEEDVFDCFDRYDKIPTKNSVAYIFSNVTFRDNETRDASTQDNHLFKEALINLGFRAENIKEYVDMETSDIPGKFDEDFDYPEIDCFVCAILSYMLPENRIRTYDKAIPLNKILRCVEDSSYLKDKPKLMFVVTTPRHCDNAIEKCDADTIGFEEEHTTPRTADMLVVCSSSDNTTRSSYFMKFLHKVLEECGNKYDIMTILAAVSNCIKEEIESNEQMPCIMSTLTKQLKFERSTNNTV	>Cluster-58773.110379;orf1 len=257 frame:1 start:346 end:1116 gi|347972707|ref|XP_320580.4| AGAP011952-PA [Anopheles gambiae str. PEST]>gi|333469693|gb|EAA00684.4| AGAP011952-PA [Anopheles gambiae str. PEST]	0.001	1.268	2	4	1	1	1	1	256	29.5	4.98	2.06	4	1	1	0	0	Not Found	High	Not Found	Not Found	High	Not Found	Not Found	High	Not Found	1
High	Master Protein	-5873750430377762985	106	A0A6P7S7T5	acid ceramidase-like OS=Octopus vulgaris OX=6645 GN=LOC115209837 PE=3 SV=1	MYVKIITILIFVTVVSGFVLKPFDGKCVTDAYPPKSSTTVPNLTINLDLPAHDRWKEVAIKYKDSMKSLIGDLKKLVGSVPVVGDLIIKIIDNEFEKIIPTLPAPYADELLGMADYSGINRGEILLYNIFYEVFTVCTSIIAEDKNGELFHARNLDFGLFMGWDLKKNDWAITEALRPMIMNLDFQKNNKTVFKSASFAGYIGVLSGVKPGVISLTLNERFQLKGGFIGIIQWLLGQRTAKWSSFLTRDTLTSATSYQMAKTELSKTELLAPVYFILGGTKSKEGCVITRSLNKTDNIWEMSAAGGWYILETNYDHWLPPLFIDDRRTPATLCMNELTQNNLTMAGLYNVLSTKPVLNKLTTYTALMQAKSGSLETHIQKCPDPCWPW	>tr|A0A6P7S7T5|A0A6P7S7T5_OCTVU acid ceramidase-like OS=Octopus vulgaris OX=6645 GN=LOC115209837 PE=3 SV=1	0.001	1.226	2	2	1	1	0	1	388	43.5	7.94	1.91	2	1	1	0	0	Not Found	High	Not Found	Not Found	High	Not Found	Not Found	High	Not Found	1
High	Master Protein	-1027293112218449416	220	A0A812CTD3	Hypothetical protein OS=Sepia pharaonis OX=158019 GN=SPHA_40360 PE=4 SV=1	MQVRSRPGKSPTGVLHERGARWGIGQGGIRVASHCIYYLSIYLSIYLSIYLSMSTRISHCICLFISISLSIYLYIYLEFVYIYHILYISIYLSIYLSIYLSIYLSQTVHIYLSIYLSIYLSHFVHFCLSQFIFISITITVCSYLSIYLSIYLSRSLSLSSNLSQNRNYFIPSPKQPASLIWSDANIIDAFRLFPLRHGKEWQVR	>tr|A0A812CTD3|A0A812CTD3_SEPPH Hypothetical protein OS=Sepia pharaonis OX=158019 GN=SPHA_40360 PE=4 SV=1	0.001	1.218	2	4	1	2	1	1	204	23.8	9.25	4.18	4	2	1	0	0	High	Not Found	High	High	Not Found	High	High	Not Found	High	1
High	Master Protein	-6271440292932555759	99	A0A6P7SZ60	aldehyde dehydrogenase, mitochondrial OS=Octopus vulgaris OX=6645 GN=LOC115217872 PE=3 SV=1	MLSTSAWRSISRSPLRWYMLSSKAGYAGIPAPITNPDIAQSKIFINNEFVNSASGKTFQTLNPSNGDVICEVAEGDKADIDKAVAAAKDAFRLGSPWRRMDASDRGNLMYKLADLIERDKNYIASLETLDNGKTYTQSYLVDVAAVVNTYRYYAGWADKNHGKTIPIRGDHFTYTRHEPVGVCGQIIPWNFPLLMQAWKLGPALALGNTVVMKTAEQTPLSALYIAQLAVEAGYPPGVLNIVPGYGPTAGAALAKHMDVDKIAFTGSTEIGKIVSVMATESNLKRVTLELGGKSPNIVFADANMDLAVETCHLGLFFNQGQCCCAGSRIFVEEKVYDEFVERSVERARRKVVGDPFDRSSEQGPQVDQEQLTKILSLIESGKQEGAKLCTGGARHGDKG…	>tr|A0A6P7SZ60|A0A6P7SZ60_OCTVU aldehyde dehydrogenase, mitochondrial OS=Octopus vulgaris OX=6645 GN=LOC115217872 PE=3 SV=1	0.001	1.217	2	3	1	1	0	1	521	57	6.39	0	3	1	1	0	0	Not Found	High	Not Found	Not Found	High	Not Found	Not Found	High	Not Found	1
High	Master Protein	-8304966517685171248	35	A0A6P7STJ4	Carboxylic ester hydrolase OS=Octopus vulgaris OX=6645 GN=LOC115216415 PE=3 SV=1	MEGLKYIFIISLLKIYVLAEDPIIDTTTGTIKGSTFSVQNVDIDVFLGIPFAKPPVGNLRFKRPEPIERWSGIKETKKHVSSCIQLVEAFDHIEGADSFKVNTNISEDCLYLNIWAPTEARKSHSNLATMIWIYGGALVSGTSTLDAYDGRFLAASQKIIVASLNYRVGPFGFLSLNDERAPGNMGLLDQTLAISWIRDNIASFGGDPDKLTLFGQSAGAISVSFHVMSPISRKIFRNAIIMSGIATTDWSVRSKEGNIERAKEMAAFLKCPTENDKVMLDCFLNADANNISMGQYYNFKNITEFPFAPIIDNYFLQEKPKEIVQNKKMKKDVMIGFLKNEGSLMILIRYPEYFAPNTNVPVNKSVAHKMMRNLIEPKQLNSLQLESISHLYGSHVDTS…	>tr|A0A6P7STJ4|A0A6P7STJ4_OCTVU Carboxylic ester hydrolase OS=Octopus vulgaris OX=6645 GN=LOC115216415 PE=3 SV=1	0.001	1.207	3	3	1	1	0	1	597	67.7	6.93	2.74	3	1	1	0	0	Not Found	Not Found	High	Not Found	Not Found	High	Not Found	Not Found	High	1
High	Master Protein	-8911623139366932550	12	Q24925	Peroxidase-like protein (Fragment) OS=Euprymna scolopes OX=6613 PE=2 SV=1	LFLVVLPCLVSCLTPITDDLCQKAYEKACKKVRSGRDFGGFRSERGRGGRTGGFRNSRGTSDVAGAEGTRGAAGDAGVAEAAGNTVAAAAAAAARAAGATDQGVAAAVAAGNAAAAAIEAGADAATVAEAAAAAAVAVVVGANAEAVNNATAAAVAAAEAVGADADVIAEVAAVAAAAAAEASVAGAEDAAIAEAAAVAAAAAIETAIAAANATAAAALVNAQAAETLANADLIIAETGLIFVETARLIQDLLDQGLIDAENLVTAVQPPLELVAACPFLTALTCDADFPYRTADGSCNNLVLPYLGRSSTPFERYLPAVYEDGLDLPRATGVLGGALPGARLISTNFHGFSTPADRDDQLTHLTTLFGVFLNHDLQIYPSMPTSGGDLEESIDCCNSD…	>tr|Q24925|Q24925_EUPSC Peroxidase-like protein (Fragment) OS=Euprymna scolopes OX=6613 PE=2 SV=1	0.002	1.192	4	2	1	1	0	1	894	93.4	4.53	0	2	1	1	0	0	High	Not Found	Not Found	High	Not Found	Not Found	High	Not Found	Not Found	1
High	Master Protein	33586650619475379	235	A0A812DRM9	Hypothetical protein OS=Sepia pharaonis OX=158019 GN=SPHA_58637 PE=4 SV=1	MCSLLFNTSPRQIMCSLLFNTSPRQIMCSLLFNTSPRQIMCSLLFNTSPRQIMCSLLFNTSLDRLCVLFCSTHPLLDYVFSFCSTHPSTDYVFSFVQHIPSTDYVFSFVQQIPSTDYVFSFVQHIPSTDYVFSFVQHIPSTDYVFSFVQHIPSTDYVFFWLTHPLDRLCVLFCSTHPLLDYVFLFCSTHPLDRLCVLFCSTHPLDRLCVLFCSTHPSTDYVFFFVQHIPSTDYVFSFVQHIPRQIMCSLFVQHIPRQIMCSLLFNTSPRQIMCSLLFNTSLARLCVLFCSTHPSTDYVFSFVQHIPSTDYVFSFVQHIPSTDYVFSFVQHIPSTDYVFSLVQHIPSTDYVFSFVQHIPLLDYVFSFVQHIPSTDYVFSFVQHIPSTDYVFSFVQHIPST…	>tr|A0A812DRM9|A0A812DRM9_SEPPH Hypothetical protein OS=Sepia pharaonis OX=158019 GN=SPHA_58637 PE=4 SV=1	0.002	1.175	4	3	1	1	1	1	489	57	6.76	0	3	1	1	0	0	Not Found	Not Found	High	Not Found	Not Found	High	Not Found	Not Found	High	1
High	Master Protein	-8788300825561923459	22	Cluster-141421.4;orf1 len=365 frame:2 start:2 end:1096 gi	470476037 ref|XP_004342217.1| hypothetical protein ACA1_115170 [Acanthamoeba castellanii str. Neff]>gi|440799046|gb|ELR20107.1| hypothetical protein ACA1_115170 [Acanthamoeba castellanii str. Neff]	SYSIDADTAALVETIYLNGLGEFAYRNGLNLRGRFRLPVQGEAVQAPALGLQAHALVAIGGGKDSLVSIEALRRAGVDETVTWIGGSQLIRACAERTGLPTLNLGRTLAPELFELNRQGAWNGHIPVTVVNSAIMVLAALLHGVDQVVFSNERSASYGSQIPGTGEVNHQWSKGWACEQAFGSHVQKHVAADLQYYSLLRPMSELAVARQFAKSDFYDAHFSSCNRNFHILGERPVNRWCGVCPKCHFVFLALAPFMPKTRLVRIFGRNLLDDAEQAGGFDALLEFQDHKPFECVGEGRESRAAMATLAQRPEWKEDVLVKRFCNEIQPQLDAAELELAPLLQLQGEHRVPAALWERVREDFEA	>Cluster-141421.4;orf1 len=365 frame:2 start:2 end:1096 gi|470476037|ref|XP_004342217.1| hypothetical protein ACA1_115170 [Acanthamoeba castellanii str. Neff]>gi|440799046|gb|ELR20107.1| hypothetical protein ACA1_115170 [Acanthamoeba castellanii str. Neff]	0.002	1.169	4	3	1	1	1	1	364	40.2	6.33	0	3	1	1	0	0	High	Not Found	Not Found	High	Not Found	Not Found	High	Not Found	Not Found	1
High	Master Protein	5163087357859339640	313	A0A0L8GKZ1	Helicase C-terminal domain-containing protein OS=Octopus bimaculoides OX=37653 GN=OCBIM_22031992mg PE=4 SV=1	MSSIMGTLGRCDLCIVSYTSKQHKESHLKGKKHQKKFSERERFCTSLPIRQVESPSNVQPVHAALSNIPPYNTEAITEPTRSQNVSINVQTTQTCKEDENIVSLRPTSLDRNEFIRIYKDEDDEIIGYKCTLCSKKLQCASAVTSHLQSSAHCKNVSEQPSKLYNLPPIVHHCEDPIDEAYCLTDSIPRGYQVELFEKSYCYDSIIFLPTGTGKTXXXXRRPVLFIVDKVLLALQQFNYIQNELKDQKFSRFDTTNIENIIERNLKIICVYGGHPGSAKEPLSMHDVIISTAVYCDLRMKENVLRWKDFSLVVIDEVHHSDKEHPFRKLLKEEHHTLEETDCPQLLGLTASPAGKETIPKTITMLQTLVTNLNNSKINIVKEEVKELMKYKSSAQLKIC…	>tr|A0A0L8GKZ1|A0A0L8GKZ1_OCTBM Helicase C-terminal domain-containing protein OS=Octopus bimaculoides OX=37653 GN=OCBIM_22031992mg PE=4 SV=1	0.003	1.157	7	1	1	1	1	1	707	79.8	6.79	0	1	1	1	0	0	High	Not Found	Not Found	High	Not Found	Not Found	High	Not Found	Not Found	1
High	Master Protein	-6123261537381639373	101	A0A7E6EGR4	short-chain collagen C4-like OS=Octopus vulgaris OX=6645 GN=LOC118760927 PE=4 SV=1	NRVISKKSLDDKPDDTPKPGPGSLYTRWGRTTCPTNSSLVYDGLVGGQYYDQSGGGSNLLCLPKDPIWANYTAKREAAGSIYGSEYQLQDYPTNKIFSFANAKSLHDHDVPCAVCLTRQPAAVMMLPARTKCYPGWTAEYSGYLMAGRHVHKGRLEYVCVDYAPEADPAGYKDDGGAVLYFVQSVCGSLPCPPYVKGLELTCVVCSKY	>tr|A0A7E6EGR4|A0A7E6EGR4_OCTVU short-chain collagen C4-like OS=Octopus vulgaris OX=6645 GN=LOC118760927 PE=4 SV=1	0.003	1.149	7	4	1	1	1	1	208	22.7	7.53	0	4	1	1	0	0	Not Found	Not Found	High	Not Found	Not Found	High	Not Found	Not Found	High	1
High	Master Protein	-8971286831728963773	9	A0A7E6FUS0	Annexin OS=Octopus vulgaris OX=6645 GN=LOC115226900 PE=3 SV=1	MDIASDTSGDFQDLLKLQMEAQRDESKQTVESHKVQKEQARQDALELYAAGEKRFGTSERRFNNIFCTRNFYHLKHVCEYYTEVAGHDIEEAVKSETSGDLKSAYLDIVRMSRSLPGYFAYRLNKSMKGLGTKDLNLIRLLVSRSEIDMVQIRDEYEQMFEETLATAIQGETMGDYEEVLLALIGHRM	>tr|A0A7E6FUS0|A0A7E6FUS0_OCTVU Annexin OS=Octopus vulgaris OX=6645 GN=LOC115226900 PE=3 SV=1	0.003	1.111	7	4	1	1	0	1	188	21.7	5.24	0	4	1	1	0	0	Not Found	High	Not Found	Not Found	High	Not Found	Not Found	High	Not Found	1
High	Master Protein	7932323227334235658	353	A0A812EMG1	DNAH OS=Sepia pharaonis OX=158019 GN=SPHA_78697 PE=4 SV=1	MISKIPRLPSITIENKVEPLSCLNHYQQINRRHSGRRKHEDVFRSSKMDGQMSQESSLKKSKHDKLSFSTNRVTSPVHLSPLQSTQVQPVPVFSPEPPEGRPRRQCDRGVMRIRMNDETEFLPLDQWEQEYEYFMMIRKIPVFANFWKWKAFTVWRVNVRSKKTKASLRPALLNVREMCHRISDMSLCKVERNHTYSLEEFSGLQFNQLQEVAGKLTTFRDLVTEVVRTACRTALLEAGFTPDDYYFDSLDKKENELMTDGCVTSGLEYDYDILVEAPEKMTYTEQANKRAHCRRLACFIHLADYLIVNTMHTLAVNSVGNTQALPAKNIPSLLDEEEMMTAKKHVPLFLTEFILEPSQIIFQPDLSAFQENINEVIRQFQDTVLGVENLIPDSYFDAF…	>tr|A0A812EMG1|A0A812EMG1_SEPPH DNAH OS=Sepia pharaonis OX=158019 GN=SPHA_78697 PE=4 SV=1	0.003	1.107	7	1	1	1	1	1	1361	156.1	5.95	0	1	1	1	0	0	Not Found	Not Found	High	Not Found	Not Found	High	Not Found	Not Found	High	1
High	Master Protein	-8982722032014774212	8	Q5MX22	Histone H3 (Fragment) OS=Sepioteuthis lessoniana OX=34570 PE=3 SV=1	RKSTGGXAPRKQLATKAARKSAPATGGVKKPHRYRPGTVALREIRRYQKSTELLIRKLPFQRLVREIAQDFKTDLRFQSSAVMALQEASEAYLVGLFEDTNLCAIHAKR	>tr|Q5MX22|Q5MX22_SEPLE Histone H3 (Fragment) OS=Sepioteuthis lessoniana OX=34570 PE=3 SV=1	0.01	1.01	22	6	1	1	0	1	109	12.3	10.8	1.9	6	1	1	0	0	Not Found	High	Not Found	Not Found	High	Not Found	Not Found	High	Not Found	1
High	Master Protein	-288091315766325727	230	A0A6P7U0P7	zinc finger ZZ-type and EF-hand domain-containing protein 1 OS=Octopus vulgaris OX=6645 GN=LOC115228010 PE=4 SV=1	MGNTSSSTETDEDLSEDTCMEYGEDGLEGLSGSKENCLLQLTEQLFDLSSLRSMACKLDEEVLQDFISMYQTYILRWIEERMSRKETTVTMREFCDMLTSKGASEKEAALAFQTFDTDGIGTAELQDIEQEIESSSDQSKGVFTEPERSIRKLKTTALIHDVGHIFLEEPIKDNYSLKILKFLIQNRAPSSSLSLPILKGVTNVMDLRLALVKSSFKSMDVLASDELLRNGEEVQQVQRCICSIEVSTNTSNSERLLNGNTSSYWQSDGTCRSHWIRLRIKNNVVIKQLSMNVSSLDQSYMPQLVSISVGKTTSLLKEIKELRIPNHVNGDYVLIENLTTYFPIIQINIKRCHSDGCDTRVHGVKAVGYRLRAKDPGLSVADASAVWFIQLLSMWITSV…	>tr|A0A6P7U0P7|A0A6P7U0P7_OCTVU zinc finger ZZ-type and EF-hand domain-containing protein 1 OS=Octopus vulgaris OX=6645 GN=LOC115228010 PE=4 SV=1	0.014	0.999	31	0	1	1	0	1	2679	304.6	5.88	0	0	1	1	0	0	High	Not Found	Not Found	High	Not Found	Not Found	High	Not Found	Not Found	1
High	Master Protein	858536186857563596	246	A0A0L8IDH2	Non-specific serine/threonine protein kinase OS=Octopus bimaculoides OX=37653 GN=OCBIM_22020713mg PE=3 SV=1	MVSSFIEGWDLVQTLGEGAYGEVKLAVNTTTNEEVAVKFINLKKDIHARESVRKEIAIHKLLKHDNVIRFYGSRTAGDQQFMFLEYACGGELFDRIEPDVGMSPQRAQYYFRQLIEGLEYLHSRGVAHRDLKPENLLLDENDNLKISDFGFATVFRYQGEEREMEKCCGTLPYVAPEVIRRRPYSAQPADIWSCGIILVAMLAGELPWDEPSNECCEYSDWVKCCSLSSPWNKIENMALSLLRKILIENSKKRYTIPQIKKNQWFSKNLRKSMPIRLETLSGDSGTFKRRCSGLDQSSPSAIGKFDHQFSLSQPDVISRATESPSSAADSLKALTYSQPVRPDHMMLSSQHQTQESQSSGPHLVRRLTRFFVKCNQEATVKELTRAFETLSYTWKKNSL…	>tr|A0A0L8IDH2|A0A0L8IDH2_OCTBM Non-specific serine/threonine protein kinase OS=Octopus bimaculoides OX=37653 GN=OCBIM_22020713mg PE=3 SV=1	0.014	0.976	31	2	1	1	1	1	476	54.4	8.63	0	2	1	1	0	0	High	Not Found	Not Found	High	Not Found	Not Found	High	Not Found	Not Found	1
High	Master Protein	-847072002785517180	223	A0A7E6FDU1	Glucose-6-phosphate 1-dehydrogenase OS=Octopus vulgaris OX=6645 GN=LOC115220357 PE=3 SV=1	MQNQDAEPGIPHVTATECYEQFLGAVHACTDSSHAHVFIILGASGDLARKKIYPTLWCLFRDKLLPPETYFIGFARSKLEMSDIFKKVQPYMKVKSDEMELLQSFFKINEYMSGNYDSQEDFEKLNELLEAKGKCNRIFYLALPPNIFEPATAQIKGVCMAHESRFTRIIIEKPFGRDLDSYTALSEHISSMFPEEQIYRIDHYLGKEMVQNLMIFRFGNLIFNPIWNNSHVSSVVISFKEPIGTQGRGGYFDQSGIIRDVMQNHLLQLLSIVAMDQPSSTSAEDIRNEKVKVLKCIEPPEMKNVVLGQYVGDPDTEGDSAKGYLDDPTVPDDSVTPTFAAAVLFVNNERWKGVPFILRCGKALNERKAEIRIQFQDVPSNIFNRGCIKRNELVFRVQP…	>tr|A0A7E6FDU1|A0A7E6FDU1_OCTVU Glucose-6-phosphate 1-dehydrogenase OS=Octopus vulgaris OX=6645 GN=LOC115220357 PE=3 SV=1	0.014	0.962	31	4	1	1	0	1	518	59.4	5.62	0	4	1	1	0	0	Not Found	High	Not Found	Not Found	High	Not Found	Not Found	High	Not Found	1
High	Master Protein	-5002602358156954208	132	A0A812CC32	Cilia- and flagella-associated protein 65 OS=Sepia pharaonis OX=158019 GN=SPHA_36641 PE=4 SV=1	MPAKSKHVVQATVRPSFQASYRFVISYQLVLDQDHVKNPNLLEPKHLCHLLMNGVFPSFIITDIHGQGSAKEISKRQLWTLFSLDNLNSYFTSDPSYQELMYSMETQKTTDRLPAFSTQAIVEFNFSAAPLHSPPSVFVLQIENNGTVPAEWALLFPDDMKLEVEPWADTGDLNDEELHQMKVLENKLFIIEPIHGYLEPGEGMAITLTYNHVLAGTDHLNVLFKVVNGREILVSRIDLFHLFCL	>tr|A0A812CC32|A0A812CC32_SEPPH Cilia- and flagella-associated protein 65 OS=Sepia pharaonis OX=158019 GN=SPHA_36641 PE=4 SV=1	0.014	0.953	31	13	1	1	1	1	245	27.9	5.52	0	13	1	1	0	0	Not Found	Not Found	High	Not Found	Not Found	High	Not Found	Not Found	High	1
High	Master Protein	-6629072201456709455	88	A0A7E6EW14	Tetraspanin OS=Octopus vulgaris OX=6645 GN=LOC115212017 PE=3 SV=1	MGLGGCYTCIKYLMFAFNFIFWLLGCAILGVGIWIRIDPTFQMYIDDNFNLPYLGAYILIGVGVLMMIIGFIGCCGAIRKSQCLLASFFICLFIIFAILLGAGIFAIISKSNDELDLMGNLVEDMLDNAVEKYDTNKASQILMDSVQKDFNCCGSTRGKIDYGDTSPHVKTCIRDFYDIPCKNKLTEFFTDYMVIIAGVAIGIAIVMILGMIFSMILCCSLREVA	>tr|A0A7E6EW14|A0A7E6EW14_OCTVU Tetraspanin OS=Octopus vulgaris OX=6645 GN=LOC115212017 PE=3 SV=1	0.014	0.935	32	5	1	1	0	1	225	24.9	5.01	0	5	1	1	0	0	High	Not Found	Not Found	High	Not Found	Not Found	High	Not Found	Not Found	1
High	Master Protein	-4200587024067580900	154	Cluster-58773.161421;orf1 len=187 frame:-2 start:2189 end:1629 gi	871236028 ref|XP_005099501.2| PREDICTED: troponin I-like [Aplysia californica]	TMSEEEEREEAERKKRQEEAARRRHEEEEKKKKGKRKGLGGLSPEKKKLLKKLIMQKAAEDLKNEAKRKAEEKERFICERVEPLITEGLNEAQLQDLVKKLHAKTAELEEEVYDCEFKIRRQEFEINDLTIKVNDTRGKFVKPVLKKVSKTEAKLAKLERKKAENFRPTLKSTHESQKEEDGAAEE	>Cluster-58773.161421;orf1 len=187 frame:-2 start:2189 end:1629 gi|871236028|ref|XP_005099501.2| PREDICTED: troponin I-like [Aplysia californica]	0.014	0.93	32	4	1	1	1	1	186	21.8	8.91	1.67	4	1	1	0	0	Not Found	Not Found	High	Not Found	Not Found	High	Not Found	Not Found	High	1
High	Master Protein	-2823729204909726684	173	A0A812DX04	Hypothetical protein OS=Sepia pharaonis OX=158019 GN=SPHA_61893 PE=4 SV=1	MKLSMSIFDKHSYLLIPLSLTTVCNGISIYLSIYLSIYLSIYLSIYRSLYYLSIYLSIYLSIYLSQLLHFPSISVCFLLSIYLSIYLSIYLSIYLSISICFRLFIYLFHLYLSIYLSIYLSIYLSIYLSIYLSITASSYLSIYITFADLYVHTIYLSIYLSIYLSIYLSMSGCIYLSLTVSVGAYLSIYLSIYLSIYLSIYLFQAFSFHYNCPQTIPLCSNGQKHADILPTSQVLVYTSRY	>tr|A0A812DX04|A0A812DX04_SEPPH Hypothetical protein OS=Sepia pharaonis OX=158019 GN=SPHA_61893 PE=4 SV=1	0.014	0.92	32	3	1	1	1	1	241	28	8.18	0	3	1	1	0	0	Not Found	High	Not Found	Not Found	High	Not Found	Not Found	High	Not Found	1

## Sheet: PEPTIDE_GROUPS
Confidence	PSM Ambiguity	Sequence	Modifications	Modifications (all possible sites)	Qvality PEP	Qvality q-value	SVM_Score	# Protein Groups	# Proteins	# PSMs	Master Protein Accessions	Master Protein Descriptions	Protein Accessions	# Missed Cleavages	Theo. MH+ [Da]	Sequence Length	Found in File: [F1]	Found in File: [F2]	Found in File: [F3]	Found in Sample: [S1] F1: Sample	Found in Sample: [S2] F2: Sample	Found in Sample: [S3] F3: Sample	Found in Sample Group: [S1] F1: Sample	Found in Sample Group: [S2] F2: Sample	Found in Sample Group: [S3] F3: Sample	Confidence (by Search Engine): Sequest HT	Charge (by Search Engine): Sequest HT	DeltaScore (by Search Engine): Sequest HT	DeltaCn (by Search Engine): Sequest HT	Rank (by Search Engine): Sequest HT	Search Engine Rank (by Search Engine): Sequest HT	Concatenated Rank (by Search Engine): Sequest HT	m/z [Da] (by Search Engine): Sequest HT	DeltaM [ppm] (by Search Engine): Sequest HT	Deltam/z [Da] (by Search Engine): Sequest HT	RT [min] (by Search Engine): Sequest HT	Percolator q-Value (by Search Engine): Sequest HT	Percolator PEP (by Search Engine): Sequest HT	Percolator SVMScore (by Search Engine): Sequest HT	XCorr (by Search Engine): Sequest HT
High	Unambiguous	AAATPQHLFNYHK			0.00176619	0.00133933	1.138	3	4	6	A0A6P7SER3; A0A6P7SDC4; Cluster-58773.162319;orf1 len=2921 frame:3 start:24 end:8786 gi	hemocyanin 1-like OS=Octopus vulgaris OX=6645 GN=LOC115212215 PE=4 SV=2 hemocyanin G-type, units Oda to Odg OS=Octopus vulgaris OX=6645 GN=LOC115211670 PE=4 SV=2 16596797 gb|AAK28276.2| hemocyanin G-type [Enteroctopus dofleini]	A0A6P7SER3; Cluster-58773.162316;orf1 len=2526 frame:3 start:24 end:7601 gi; A0A6P7SDC4; Cluster-58773.162319;orf1 len=2921 frame:3 start:24 end:8786 gi	0	1497.76	13	High	High	High	High	High	High	High	High	High	High	2	0.5654	0	1	1	1	749.385	2	0.00149	29.4202	0.0008107	0.0003853	1.138	3.82
High	Unambiguous	LTAINVENTEENR			0.000302038	0.00133933	1.523	1	11	2	Cluster-58773.141566;orf1 len=422 frame:2 start:2 end:1267 gi	405964948 gb|EKC30386.1| Fructose-bisphosphate aldolase [Crassostrea gigas]	Cluster-58773.141569;orf1 len=371 frame:1 start:1471 end:2583 gi; Cluster-58773.141566;orf1 len=422 frame:2 start:2 end:1267 gi; A0A6P7TM96; Cluster-58773.141575;orf1 len=378 frame:3 start:279 end:1412 gi; G1CW58; Cluster-58773.141574;orf1 len=371 frame:3 start:1548 end:2660 gi; A0A7E6FTI1; A0A6P7TN91; Cluster-58773.141564;orf1 len=236 frame:-3 start:709 end:2 gi; A0A0L8HKK9; Cluster-58773.141565…	0	1502.74	13	Not Found	High	High	Not Found	High	High	Not Found	High	High	High	2	0.6913	0	1	1	1	751.878	2.78	0.00209	37.078	0.0008107	4.589e-05	1.523	3.92
High	Unambiguous	LTAINVENTEENRR			0.000124585	0.00133933	1.716	1	11	3	Cluster-58773.141566;orf1 len=422 frame:2 start:2 end:1267 gi	405964948 gb|EKC30386.1| Fructose-bisphosphate aldolase [Crassostrea gigas]	Cluster-58773.141569;orf1 len=371 frame:1 start:1471 end:2583 gi; Cluster-58773.141566;orf1 len=422 frame:2 start:2 end:1267 gi; A0A6P7TM96; Cluster-58773.141575;orf1 len=378 frame:3 start:279 end:1412 gi; G1CW58; Cluster-58773.141574;orf1 len=371 frame:3 start:1548 end:2660 gi; A0A7E6FTI1; A0A6P7TN91; Cluster-58773.141564;orf1 len=236 frame:-3 start:709 end:2 gi; A0A0L8HKK9; Cluster-58773.141565…	1	1658.85	14	Not Found	High	High	Not Found	High	High	Not Found	High	High	High	3	0.5	0	1	1	1	553.621	0.82	0.00045	30.7902	0.0008107	1.569e-05	1.716	5.38
High	Unambiguous	LTDEEVDEMIR			0.00134139	0.00133933	1.198	1	22	1	A0A6P7S9Z4	Calmodulin OS=Octopus vulgaris OX=6645 GN=LOC115210643 PE=3 SV=1	Cluster-106937.0;orf1 len=164 frame:2 start:53 end:544 gi; A0A7E6ELK9; A0A0L8I861; Cluster-100753.0;orf1 len=182 frame:1 start:67 end:612 gi; Cluster-58773.245204;orf1 len=178 frame:2 start:272 end:805 gi; Cluster-11155.0;orf1 len=155 frame:3 start:153 end:617 gi; A0A0L8GZQ2; A0A0L8H000; Cluster-77789.0;orf1 len=168 frame:3 start:3 end:506 gi; Cluster-58773.242980;orf1 len=166 frame:3 start:3 end…	0	1349.63	11	Not Found	High	Not Found	Not Found	High	Not Found	Not Found	High	Not Found	High	2	0.5625	0	1	1	1	675.316	-0.01	0	50.2197	0.0008107	0.0002765	1.198	3.52
High	Unambiguous	LTDEEVDEMIR	1xOxidation [M9]	1xOxidation [M9]	0.00094662	0.00133933	1.274	1	22	2	A0A6P7S9Z4	Calmodulin OS=Octopus vulgaris OX=6645 GN=LOC115210643 PE=3 SV=1	Cluster-106937.0;orf1 len=164 frame:2 start:53 end:544 gi; A0A7E6ELK9; A0A0L8I861; Cluster-100753.0;orf1 len=182 frame:1 start:67 end:612 gi; Cluster-58773.245204;orf1 len=178 frame:2 start:272 end:805 gi; Cluster-11155.0;orf1 len=155 frame:3 start:153 end:617 gi; A0A0L8GZQ2; A0A0L8H000; Cluster-77789.0;orf1 len=168 frame:3 start:3 end:506 gi; Cluster-58773.242980;orf1 len=166 frame:3 start:3 end…	0	1365.62	11	Not Found	High	High	Not Found	High	High	Not Found	High	High	High	2	0.4353	0	1	1	1	683.314	-0.03	-2e-05	37.06	0.0008107	0.0001818	1.274	2.32
High	Unambiguous	LTESDQQQYR			0.00157492	0.00133933	1.163	1	3	1	A0A6P7SE31	26S proteasome non-ATPase regulatory subunit 2 OS=Octopus vulgaris OX=6645 GN=LOC115211842 PE=3 SV=1	Cluster-58773.193528;orf1 len=592 frame:2 start:56 end:1831 gi; Cluster-58773.193524;orf1 len=118 frame:-2 start:354 end:1 gi; A0A6P7SE31	0	1267.59	10	Not Found	High	Not Found	Not Found	High	Not Found	Not Found	High	Not Found	High	2	0.6022	0	1	1	1	634.3	0.36	0.00023	21.3148	0.0008107	0.0003366	1.163	2.79
High	Unambiguous	ITLTHSTPNDVFDYQNVLHYK			5.65854e-05	0.00133933	1.888	3	5	6	A0A6P7SER3; A0A6P7SDC4; Cluster-58773.162319;orf1 len=2921 frame:3 start:24 end:8786 gi	hemocyanin 1-like OS=Octopus vulgaris OX=6645 GN=LOC115212215 PE=4 SV=2 hemocyanin G-type, units Oda to Odg OS=Octopus vulgaris OX=6645 GN=LOC115211670 PE=4 SV=2 16596797 gb|AAK28276.2| hemocyanin G-type [Enteroctopus dofleini]	A0A6P7SER3; Cluster-58773.162316;orf1 len=2526 frame:3 start:24 end:7601 gi; Cluster-58773.162320;orf1 len=163 frame:-2 start:491 end:3 gi; A0A6P7SDC4; Cluster-58773.162319;orf1 len=2921 frame:3 start:24 end:8786 gi	0	2505.24	21	High	High	High	High	High	High	High	High	High	High	3	0.5858	0	1	1	1	835.753	1.76	0.00147	55.8282	0.0008107	6.079e-06	1.888	4.78
High	Unambiguous	LTPELLATSDVADSR			4.27308e-06	0.00133933	2.451	1	3	2	A0A6P7U7W9	putative aminopeptidase W07G4.4 isoform X1 OS=Octopus vulgaris OX=6645 GN=LOC115232621 PE=3 SV=1	Cluster-58773.206032;orf1 len=531 frame:1 start:643 end:2235 gi; A0A7E6FRC1; A0A6P7U7W9	0	1587.82	15	Not Found	High	High	Not Found	High	High	Not Found	High	High	High	2	0.6826	0	1	1	1	794.416	1.18	0.00094	52.8594	0.0008107	2.686e-07	2.451	3.56
High	Unambiguous	LTQENFDYQHQVQELDSANAALAK			9.85902e-05	0.00133933	1.767	1	11	1	A0A6P7T042	LOW QUALITY PROTEIN: paramyosin-like OS=Octopus vulgaris OX=6645 GN=LOC115218392 PE=4 SV=1	A0A6P7T042; A0A1Y1DDA8; A0A1Y1DC43; Cluster-58773.151058;orf1 len=176 frame:-3 start:541 end:14 gi; A0A1Y1DCG9; A0A1Y1DCD9; A0A2Z5U2S9; Cluster-58773.164372;orf1 len=235 frame:-3 start:705 end:1 gi; A0A812CK18; A0A2Z5U2T7; Cluster-58773.162330;orf1 len=177 frame:-1 start:531 end:1 gi	0	2733.31	24	Not Found	High	Not Found	Not Found	High	Not Found	Not Found	High	Not Found	High	3	0.3187	0	1	1	1	911.776	0.35	0.00032	54.3576	0.0008107	1.187e-05	1.767	3.86
High	Unambiguous	ITQGNQEFVELGNLDSK			0.000173358	0.00133933	1.644	1	7	1	A0A0L8G196	GDP-D-mannose dehydratase (Fragment) OS=Octopus bimaculoides OX=37653 GN=OCBIM_22002213mg PE=3 SV=1	Cluster-58773.33943;orf1 len=367 frame:2 start:2 end:1102 gi; Cluster-58773.33944;orf1 len=315 frame:2 start:2 end:946 gi; A0A0L8G196; A0A6P7T933; Cluster-58773.33945;orf1 len=362 frame:2 start:2 end:1087 gi; A0A0L8G1L1; A0A6P7T9D8	0	1891.94	17	Not Found	High	Not Found	Not Found	High	Not Found	Not Found	High	Not Found	High	2	0.6401	0	1	1	1	946.475	1.52	0.00143	54.161	0.0008107	2.344e-05	1.644	3.64
High	Unambiguous	ITSDLEGHPTPR			0.00016711	0.00133933	1.652	1	5	3	A0A6P7SAW7	transketolase OS=Octopus vulgaris OX=6645 GN=LOC115210747 PE=4 SV=1	A0A0L8HW75; A0A6P7SAW7; Cluster-58773.128728;orf1 len=632 frame:1 start:466 end:2361 gi; Cluster-58773.184718;orf1 len=122 frame:-3 start:368 end:3 gi; A0A812C842	0	1322.67	12	Not Found	High	High	Not Found	High	High	Not Found	High	High	High	3	0.6551	0	1	1	1	441.561	-0.46	-0.0002	24.5585	0.0008107	2.243e-05	1.652	3.74
High	Unambiguous	LTSEEADQLLQGVEDSHGNVNYEELIR			2.20685e-06	0.00133933	2.595	1	4	1	A0A0L8HS39	Uncharacterized protein OS=Octopus bimaculoides OX=37653 GN=OCBIM_22007563mg PE=4 SV=1	Cluster-58773.186489;orf1 len=185 frame:2 start:218 end:772 gi; A0A0L8HS39; A0A6P7SU30; A0A6P7STT8	0	3058.46	27	Not Found	High	Not Found	Not Found	High	Not Found	Not Found	High	Not Found	High	3	0.7101	0	1	1	1	1020.16	-0.37	-0.00038	67.5827	0.0008107	1.211e-07	2.595	5.14
High	Unambiguous	LTAGAESYQK			0.00160407	0.00133933	1.159	1	3	1	A0A6P7SEM8	Alpha-mannosidase OS=Octopus vulgaris OX=6645 GN=LOC115211875 PE=3 SV=1	Cluster-58773.119062;orf1 len=1001 frame:3 start:228 end:3230 gi; Cluster-58773.119061;orf2 len=601 frame:3 start:228 end:2030 gi; A0A6P7SEM8	0	1067.54	10	Not Found	Not Found	High	Not Found	Not Found	High	Not Found	Not Found	High	High	2	0.5	0	1	1	1	534.272	-0.67	-0.00036	22.1383	0.0008107	0.0003429	1.159	2.28
High	Unambiguous	ITVEYVKDGDSWK			0.000696144	0.00133933	1.341	1	2	2	Cluster-58773.126821;orf1 len=158 frame:3 start:462 end:935 gi	677969078 ref|XP_009070303.1| PREDICTED: fatty acid-binding protein, liver [Acanthisitta chloris]>gi|677295301|gb|KFP77729.1| Fatty acid-binding protein, liver [Acanthisitta chloris]	Cluster-58773.126821;orf1 len=158 frame:3 start:462 end:935 gi; A0A6P7U9H1	1	1539.77	13	Not Found	High	High	Not Found	High	High	Not Found	High	High	High	3	0.3968	0	1	1	1	513.926	-4.54	-0.00233	41.664	0.0008107	0.0001257	1.341	3.15
High	Unambiguous	LVENIANHLIDAQEFIQK			0.000674144	0.00133933	1.348	1	6	1	A0A6P7TRF4	catalase OS=Octopus vulgaris OX=6645 GN=LOC115228352 PE=3 SV=1	Cluster-58773.91431;orf1 len=453 frame:1 start:118 end:1476 gi; Cluster-58773.91439;orf1 len=408 frame:3 start:342 end:1565 gi; Cluster-58773.91432;orf1 len=545 frame:3 start:225 end:1859 gi; A0A6P7TRF4; Cluster-58773.91430;orf1 len=78 frame:1 start:853 end:1086 gi; A0A0L8G7Y6	0	2095.12	18	Not Found	High	Not Found	Not Found	High	Not Found	Not Found	High	Not Found	High	3	0.3008	0	1	1	1	699.045	0.48	0.00033	61.8625	0.0008107	0.0001206	1.348	2.46
High	Unambiguous	LVETAPGNGWDLAALDIQQGR			7.67393e-08	0.00133933	3.327	1	1	6	A0A0L8FXZ4	Uncharacterized protein OS=Octopus bimaculoides OX=37653 GN=OCBIM_22004572mg PE=4 SV=1	A0A0L8FXZ4	0	2224.14	21	High	High	High	High	High	High	High	High	High	High	2	0.6188	0	1	1	1	1112.57	0.28	0.00031	67.1129	0.0008107	2.094e-09	3.327	3.62
High	Unambiguous	LVETAPGNGWDLAALNIQQGR			1.10776e-07	0.00133933	3.247	1	5	7	Cluster-58773.132244;orf1 len=954 frame:2 start:176 end:3037 gi	159006 gb|AAA16244.1| peroxidase-like protein, partial [Euprymna scolopes]	Cluster-58773.132244;orf1 len=954 frame:2 start:176 end:3037 gi; A0A7E6FIS1; Cluster-58773.132246;orf1 len=948 frame:2 start:176 end:3019 gi; Cluster-58773.132245;orf1 len=864 frame:2 start:176 end:2767 gi; Cluster-58773.132247;orf1 len=433 frame:-1 start:1324 end:26 gi	0	2223.15	21	High	High	High	High	High	High	High	High	High	High	2	0.7154	0	1	1	1	1112.08	0.62	0.00069	65.8389	0.0008107	3.27e-09	3.247	5.27
High	Unambiguous	LVIDGHIITVFNER			0.00113204	0.00133933	1.235	1	2	1	Cluster-58773.160890;orf1 len=401 frame:2 start:1043 end:2245 gi	300518909 gb|ADK25704.1| glyceraldehyde-3-phosphate dehydrogenase [Cancer borealis]	Cluster-58773.158180;orf1 len=329 frame:-2 start:988 end:2 gi; Cluster-58773.160890;orf1 len=401 frame:2 start:1043 end:2245 gi	0	1625.9	14	Not Found	High	Not Found	Not Found	High	Not Found	Not Found	High	Not Found	High	3	0.6074	0	1	1	1	542.638	-0.37	-0.0002	59.2897	0.0008107	0.000226	1.235	2.7
High	Unambiguous	LVPGWTQAITIGR			0.000715571	0.00133933	1.335	1	3	1	A0A6P7TGA0	Isocitrate dehydrogenase [NADP] OS=Octopus vulgaris OX=6645 GN=LOC115223822 PE=3 SV=1	Cluster-58773.134125;orf1 len=449 frame:2 start:584 end:1930 gi; A0A6P7TGA0; A0A0L8H5J4	0	1411.81	13	Not Found	High	Not Found	Not Found	High	Not Found	Not Found	High	Not Found	High	2	0.6654	0	1	1	1	706.406	-0.16	-0.00012	61.5808	0.0008107	0.00013	1.335	2.6
High	Unambiguous	IVPNQDPDEVQR			0.000319135	0.00133933	1.511	1	3	1	A0A7E6EXQ9	cytosolic non-specific dipeptidase isoform X2 OS=Octopus vulgaris OX=6645 GN=LOC115213823 PE=3 SV=1	A0A7E6EXQ9; A0A6P7SJY6; Cluster-58773.89572;orf1 len=492 frame:3 start:6 end:1481 gi	0	1409.7	12	Not Found	Not Found	High	Not Found	Not Found	High	Not Found	Not Found	High	High	2	0.31	0	1	1	1	705.355	-0.12	-8e-05	28.5959	0.0008107	4.891e-05	1.511	2
High	Unambiguous	IVSDVQPTEIYNLAAQSHVK			2.36629e-05	0.00133933	2.078	1	7	2	A0A0L8G196	GDP-D-mannose dehydratase (Fragment) OS=Octopus bimaculoides OX=37653 GN=OCBIM_22002213mg PE=3 SV=1	Cluster-58773.33943;orf1 len=367 frame:2 start:2 end:1102 gi; Cluster-58773.33944;orf1 len=315 frame:2 start:2 end:946 gi; A0A0L8G196; A0A6P7T933; Cluster-58773.33945;orf1 len=362 frame:2 start:2 end:1087 gi; A0A0L8G1L1; A0A6P7T9D8	0	2212.16	20	Not Found	High	High	Not Found	High	High	Not Found	High	High	High	3	0.427	0	1	1	1	738.058	0.04	3e-05	54.9942	0.0008107	2.121e-06	2.078	3.7
High	Unambiguous	LVVMQFEDALLAR	1xOxidation [M4]	1xOxidation [M4]	0.000484505	0.00133933	1.42	5	9	6	A0A6P7SER3; Q9BJ58; O61363; A0A6P7SDC4; Cluster-58773.162319;orf1 len=2921 frame:3 start:24 end:8786 gi	hemocyanin 1-like OS=Octopus vulgaris OX=6645 GN=LOC115212215 PE=4 SV=2 Hemocyanin G-type (Fragment) OS=Enteroctopus dofleini OX=267067 PE=4 SV=2 Hemocyanin G-type, units Oda to Odg OS=Enteroctopus dofleini OX=267067 GN=ODHCY PE=1 SV=1 hemocyanin G-type, units Oda to Odg OS=Octopus vulgaris OX=6645 GN=LOC115211670 PE=4 SV=2 16596797 gb|AAK28276.2| hemocyanin G-type [Enteroctopus dofleini]	A0A0L8GNM6; A0A6P7SER3; Cluster-58773.162316;orf1 len=2526 frame:3 start:24 end:7601 gi; Q9BJ58; O61363; A0A6P7SDC4; Cluster-58773.162317;orf1 len=187 frame:-3 start:561 end:1 gi; Q5XLV2; Cluster-58773.162319;orf1 len=2921 frame:3 start:24 end:8786 gi	0	1520.81	13	High	High	High	High	High	High	High	High	High	High	2	0	0	1	1	1	760.912	1.06	0.00081	64.3887	0.0008107	8.104e-05	1.42	2.8
High	Unambiguous	LWAIWQALQEHR			0.000296546	0.00133933	1.527	5	8	3	A0A6P7SER3; Q9BJ58; O61363; A0A6P7SDC4; Cluster-58773.162319;orf1 len=2921 frame:3 start:24 end:8786 gi	hemocyanin 1-like OS=Octopus vulgaris OX=6645 GN=LOC115212215 PE=4 SV=2 Hemocyanin G-type (Fragment) OS=Enteroctopus dofleini OX=267067 PE=4 SV=2 Hemocyanin G-type, units Oda to Odg OS=Enteroctopus dofleini OX=267067 GN=ODHCY PE=1 SV=1 hemocyanin G-type, units Oda to Odg OS=Octopus vulgaris OX=6645 GN=LOC115211670 PE=4 SV=2 16596797 gb|AAK28276.2| hemocyanin G-type [Enteroctopus dofleini]	A0A6P7SER3; Cluster-58773.162316;orf1 len=2526 frame:3 start:24 end:7601 gi; Q9BJ58; O61363; A0A6P7SDC4; P12659; Q5XLV2; Cluster-58773.162319;orf1 len=2921 frame:3 start:24 end:8786 gi	0	1550.82	12	Not Found	High	High	Not Found	High	High	Not Found	High	High	High	3	0.4988	0	1	1	1	517.612	-0.88	-0.00045	66.322	0.0008107	4.474e-05	1.527	4.13
High	Unambiguous	LWAVWQALQIHR			0.000254878	0.00133933	1.56	4	5	3	A0A6P7SER3; Q9BJ58; A0A6P7SDC4; Cluster-58773.162319;orf1 len=2921 frame:3 start:24 end:8786 gi	hemocyanin 1-like OS=Octopus vulgaris OX=6645 GN=LOC115212215 PE=4 SV=2 Hemocyanin G-type (Fragment) OS=Enteroctopus dofleini OX=267067 PE=4 SV=2 hemocyanin G-type, units Oda to Odg OS=Octopus vulgaris OX=6645 GN=LOC115211670 PE=4 SV=2 16596797 gb|AAK28276.2| hemocyanin G-type [Enteroctopus dofleini]	A0A6P7SER3; Cluster-58773.162316;orf1 len=2526 frame:3 start:24 end:7601 gi; Q9BJ58; A0A6P7SDC4; Cluster-58773.162319;orf1 len=2921 frame:3 start:24 end:8786 gi	0	1520.85	12	Not Found	High	High	Not Found	High	High	Not Found	High	High	High	3	0.5328	0	1	1	1	507.62	-1.5	-0.00076	66.4604	0.0008107	3.739e-05	1.56	3.96
High	Unambiguous	IWHHTFYNELR			0.00167165	0.00133933	1.15	3	27	2	A0A6P7SKQ4; A0A812CKE2; I0JGT9	actin, cytoplasmic OS=Octopus vulgaris OX=6645 GN=LOC115214120 PE=3 SV=1 ACTB_G1 OS=Sepia pharaonis OX=158019 GN=SPHA_36281 PE=3 SV=1 Actin I OS=Sepia officinalis OX=6610 GN=ACTI PE=2 SV=1	I0JGU0; Cluster-659.0;orf1 len=379 frame:3 start:45 end:1181 gi; A0A6P7SKQ4; Cluster-382.0;orf1 len=114 frame:-3 start:342 end:1 gi; F1ADJ3; Cluster-58773.161076;orf1 len=296 frame:2 start:2 end:889 gi; D3GBA7; Cluster-58773.161083;orf1 len=335 frame:2 start:2273 end:3277 gi; A0A6P7U1I2; A4D0I0; Cluster-116978.7;orf1 len=236 frame:-3 start:710 end:3 gi; A0A6P7SM13; G3LVJ6; A0A0L8GHK7; A0A6P7U554;…	0	1515.75	11	Not Found	High	Not Found	Not Found	High	Not Found	Not Found	High	Not Found	High	2	0.5633	0	1	1	1	758.379	0.51	0.00039	36.2232	0.0008107	0.0003617	1.15	3
High	Unambiguous	ITVQSNVGELEK			0.000328042	0.00133933	1.505	1	4	2	A0A6P7U7W9	putative aminopeptidase W07G4.4 isoform X1 OS=Octopus vulgaris OX=6645 GN=LOC115232621 PE=3 SV=1	Cluster-58773.206032;orf1 len=531 frame:1 start:643 end:2235 gi; Cluster-58773.206031;orf1 len=235 frame:-1 start:705 end:1 gi; A0A7E6FRC1; A0A6P7U7W9	0	1316.71	12	Not Found	High	High	Not Found	High	High	Not Found	High	High	High	2	0.5	0	1	1	1	658.857	1.41	0.00093	38.8953	0.0008107	5.048e-05	1.505	3.18
High	Unambiguous	LYVALVEDELLAR			0.000462779	0.00133933	1.43	2	5	2	Q27Q56; W6CNR9	Hemocyanin subunit 2 (Fragment) OS=Sepia officinalis OX=6610 PE=2 SV=1 Hemocyanin subunit 3 OS=Sepia officinalis OX=6610 PE=2 SV=1	Q27Q56; A0A812CXG7; G9HTI1; W6CNR9; E7CLR5	0	1503.84	13	Not Found	High	High	Not Found	High	High	Not Found	High	High	High	2	0.5668	0	1	1	1	752.425	0.07	6e-05	65.7996	0.0008107	7.655e-05	1.43	2.17
High	Unambiguous	LSVDDPSVFEIPDICHK	1xCarbamidomethyl [C15]	1xCarbamidomethyl [C15]	0.000444059	0.00133933	1.439	1	1	3	A0A6P7TXP9	uncharacterized protein LOC115231284 OS=Octopus vulgaris OX=6645 GN=LOC115231284 PE=4 SV=1	A0A6P7TXP9	0	1970.95	17	Not Found	High	High	Not Found	High	High	Not Found	High	High	High	3	0.5212	0	1	1	1	657.656	0.18	0.00012	62.9527	0.0008107	7.281e-05	1.439	3.53
High	Unambiguous	LSLSEMNSLVHALKR	1xOxidation [M6]	1xOxidation [M6]	0.00041074	0.00133933	1.456	4	6	6	A0A6P7SER3; A0A0L8FFZ3; A0A6P7SDC4; Cluster-58773.162319;orf1 len=2921 frame:3 start:24 end:8786 gi	hemocyanin 1-like OS=Octopus vulgaris OX=6645 GN=LOC115212215 PE=4 SV=2 Tyrosinase_Cu-bd domain-containing protein (Fragment) OS=Octopus bimaculoides OX=37653 GN=OCBIM_22022789mg PE=4 SV=1 hemocyanin G-type, units Oda to Odg OS=Octopus vulgaris OX=6645 GN=LOC115211670 PE=4 SV=2 16596797 gb|AAK28276.2| hemocyanin G-type [Enteroctopus dofleini]	A0A6P7SER3; A0A0L8FFZ3; Cluster-58773.162316;orf1 len=2526 frame:3 start:24 end:7601 gi; A0A6P7SDC4; Cluster-58773.162319;orf1 len=2921 frame:3 start:24 end:8786 gi; Cluster-58773.162305;orf1 len=76 frame:-1 start:229 end:2 gi	1	1713.93	15	High	High	High	High	High	High	High	High	High	High	3	0.5614	0	1	1	1	571.98	-4.46	-0.00255	41.905	0.0008107	6.621e-05	1.456	3.42
High	Unambiguous	LNETFTDTDNFGQK			0.00194468	0.00133933	1.117	1	1	1	A0A6P7TFF7	uncharacterized protein LOC115223512 OS=Octopus vulgaris OX=6645 GN=LOC115223512 PE=4 SV=1	A0A6P7TFF7	0	1629.74	14	Not Found	High	Not Found	Not Found	High	Not Found	Not Found	High	Not Found	High	2	0.6395	0	1	1	1	815.374	1.52	0.00124	45.1073	0.0008107	0.000433	1.117	3.44
High	Unambiguous	LNFSHGSYEYHGETIK			0.000964148	0.00133933	1.27	1	6	2	A0A0L8GJH5	Pyruvate kinase OS=Octopus bimaculoides OX=37653 GN=OCBIM_22032473mg PE=3 SV=1	A0A6P7T8Q7; Cluster-58773.131064;orf1 len=496 frame:2 start:41 end:1528 gi; A0A7E6FES4; A0A7E6FCY4; A0A0L8GJH5; A0A7E6FCB9	0	1881.88	16	Not Found	High	Not Found	Not Found	High	Not Found	Not Found	High	Not Found	High	3	0.4804	0	1	1	1	627.964	0.58	0.00036	35.8157	0.0008107	0.0001856	1.27	3.06
High	Unambiguous	LNIQTELLELGDHVHPSSEVLK			0.00109627	0.00133933	1.242	1	2	2	A0A6P7SJH5	cytosolic non-specific dipeptidase OS=Octopus vulgaris OX=6645 GN=LOC115213824 PE=3 SV=1	Cluster-58773.186313;orf1 len=502 frame:3 start:3 end:1508 gi; A0A6P7SJH5	0	2471.31	22	Not Found	High	High	Not Found	High	High	Not Found	High	High	High	4	0.5079	0	1	1	1	618.584	-0.55	-0.00034	62.8063	0.0008107	0.0002172	1.242	3.78
High	Unambiguous	INNDDAHFNVQVTGSTLHEQNEEIAK			0.000176569	0.00133933	1.64	1	2	1	A0A6P7T7N8	dihydropteridine reductase OS=Octopus vulgaris OX=6645 GN=LOC115219744 PE=4 SV=1	A0A6P7T7N8; Cluster-58773.174689;orf1 len=237 frame:2 start:5 end:715 gi	0	2923.38	26	Not Found	High	Not Found	Not Found	High	Not Found	Not Found	High	Not Found	High	4	0.4466	0	1	1	1	731.601	0.84	0.00061	41.924	0.0008107	2.401e-05	1.64	4.21
High	Unambiguous	INNDDAHFNVQVTGSTLHEQNEEIAKK			0.000725487	0.00133933	1.332	1	2	2	A0A6P7T7N8	dihydropteridine reductase OS=Octopus vulgaris OX=6645 GN=LOC115219744 PE=4 SV=1	A0A6P7T7N8; Cluster-58773.174689;orf1 len=237 frame:2 start:5 end:715 gi	1	3051.48	27	Not Found	High	Not Found	Not Found	High	Not Found	Not Found	High	Not Found	High	5	0.5886	0	1	1	1	611.101	-1.01	-0.00062	37.5417	0.0008107	0.0001322	1.332	4.57
High	Unambiguous	LNVTVQSISGTGALR			0.000246822	0.00133933	1.567	1	3	1	Cluster-58773.168901;orf1 len=432 frame:1 start:457 end:1752 gi	762151209 ref|XP_011413584.1| PREDICTED: aspartate aminotransferase, mitochondrial-like, partial [Crassostrea gigas]	A0A6P7TDA4; Cluster-58773.168901;orf1 len=432 frame:1 start:457 end:1752 gi; Cluster-58773.168888;orf1 len=316 frame:-2 start:949 end:2 gi	0	1515.85	15	Not Found	Not Found	High	Not Found	Not Found	High	Not Found	Not Found	High	High	2	0.5792	0	1	1	1	758.428	-0.31	-0.00023	50.8899	0.0008107	3.582e-05	1.567	2.59
High	Unambiguous	INWDQPAEAIHNYIR			1.0125e-05	0.00133933	2.263	1	5	1	A0A7E6EW98	10-formyltetrahydrofolate dehydrogenase OS=Octopus vulgaris OX=6645 GN=LOC115216749 PE=3 SV=1	Cluster-58773.117023;orf1 len=941 frame:1 start:895 end:3717 gi; A0A0L8GLQ4; A0A7E6EW98; Cluster-58773.117018;orf1 len=857 frame:1 start:895 end:3465 gi; A0A6P7SVA2	0	1839.91	15	Not Found	High	Not Found	Not Found	High	Not Found	Not Found	High	Not Found	High	3	0.6253	0	1	1	1	613.976	0.03	2e-05	59.1419	0.0008107	7.588e-07	2.263	4.35
High	Unambiguous	LPLVIEFNQESAQK			2.80416e-05	0.00133933	2.041	1	6	1	A0A6P7TYN8	Protein disulfide-isomerase OS=Octopus vulgaris OX=6645 GN=LOC115231769 PE=3 SV=1	Cluster-58773.171208;orf1 len=289 frame:3 start:3066 end:3932 gi; A0A0L8FZT7; Cluster-58773.171212;orf1 len=456 frame:2 start:752 end:2119 gi; Cluster-58773.171210;orf1 len=520 frame:1 start:562 end:2121 gi; Cluster-58773.171213;orf1 len=297 frame:3 start:2916 end:3806 gi; A0A6P7TYN8	0	1615.87	14	Not Found	High	Not Found	Not Found	High	Not Found	Not Found	High	Not Found	High	2	0.6757	0	1	1	1	808.439	1.19	0.00096	59.6493	0.0008107	2.602e-06	2.041	3.7
High	Unambiguous	LPPVIFGQLGNDPK			0.000424146	0.00133933	1.449	2	4	2	A0A7E6EXQ9; A0A6P7SJH5	cytosolic non-specific dipeptidase isoform X2 OS=Octopus vulgaris OX=6645 GN=LOC115213823 PE=3 SV=1 cytosolic non-specific dipeptidase OS=Octopus vulgaris OX=6645 GN=LOC115213824 PE=3 SV=1	A0A7E6EXQ9; A0A6P7SJY6; Cluster-58773.186313;orf1 len=502 frame:3 start:3 end:1508 gi; A0A6P7SJH5	0	1494.83	14	Not Found	High	High	Not Found	High	High	Not Found	High	High	High	2	0.6199	0	1	1	1	747.919	-0.32	-0.00024	61.1338	0.0008107	6.916e-05	1.449	3.42
High	Unambiguous	LQAATTALNQLR			7.5207e-05	0.00133933	1.826	3	3	1	A0A6P7T042; Cluster-58773.164376;orf1 len=615 frame:1 start:1 end:1845 gi; A0A0L8G7X1	LOW QUALITY PROTEIN: paramyosin-like OS=Octopus vulgaris OX=6645 GN=LOC115218392 PE=4 SV=1 762093591 ref|XP_011429255.1| PREDICTED: paramyosin-like isoform X1 [Crassostrea gigas] Uncharacterized protein OS=Octopus bimaculoides OX=37653 GN=OCBIM_22038393mg PE=4 SV=1	A0A6P7T042; Cluster-58773.164376;orf1 len=615 frame:1 start:1 end:1845 gi; A0A0L8G7X1	0	1299.74	12	Not Found	High	Not Found	Not Found	High	Not Found	Not Found	High	Not Found	High	2	0.361	0	1	1	1	650.372	-0.42	-0.00027	44.5888	0.0008107	8.539e-06	1.826	3.85
High	Unambiguous	LQAEIDGLHDEVAR			4.37226e-06	0.00133933	2.446	1	2	2	A0A0L8GZP6	IF rod domain-containing protein OS=Octopus bimaculoides OX=37653 GN=OCBIM_22025456mg PE=4 SV=1	A0A0L8GZP6; A0A7E6FLI0	0	1565.79	14	Not Found	High	Not Found	Not Found	High	Not Found	Not Found	High	Not Found	High	3	0.6241	0	1	1	1	522.601	-1.91	-0.001	40.8431	0.0008107	2.752e-07	2.446	4.23
High	Unambiguous	LSTHEFNGLSHR			0.00047135	0.00133933	1.426	1	7	1	A0A6P7TDN6	4a-hydroxytetrahydrobiopterin dehydratase OS=Octopus vulgaris OX=6645 GN=LOC115221645 PE=3 SV=1	Cluster-58773.88592;orf1 len=133 frame:-2 start:764 end:366 gi; A0A6P7TDN6; A0A0L8GEG4; A0A6P7T9P1; Cluster-58773.88591;orf1 len=134 frame:-2 start:767 end:366 gi; A0A6P7TCB7; A0A0L8GE80	0	1397.69	12	Not Found	High	Not Found	Not Found	High	Not Found	Not Found	High	Not Found	High	3	0.5103	0	1	1	1	466.568	-2.45	-0.00114	26.5991	0.0008107	7.855e-05	1.426	3.9
High	Unambiguous	IQETITEWSDSEVITTR			1.9037e-07	0.00133933	3.129	1	3	3	A0A6P7UAQ3	14 kDa fatty acid-binding protein OS=Octopus vulgaris OX=6645 GN=LOC115232340 PE=4 SV=1	Cluster-58773.231985;orf1 len=128 frame:-2 start:432 end:49 gi; A0A6P7UAQ3; A0A0L8I098	0	2007.99	17	Not Found	High	High	Not Found	High	High	Not Found	High	High	High	2	0.6394	0	1	1	1	1004.5	0.26	0.00026	67.0559	0.0008107	6.266e-09	3.129	4.16
High	Unambiguous	IQNAGTEVVEAK			0.00050493	0.00133933	1.411	1	10	2	A0A6P7SHI1	Malate dehydrogenase OS=Octopus vulgaris OX=6645 GN=LOC115212957 PE=3 SV=1	A0A6P7SHI1; A0A0L8H8S0; A0A0L8H9R3; Q86DP6; Cluster-58773.112591;orf1 len=349 frame:2 start:395 end:1441 gi; A0A0L8H893; A0A812C5C1; Cluster-58773.112597;orf1 len=312 frame:2 start:395 end:1330 gi; Cluster-58773.112596;orf1 len=262 frame:2 start:395 end:1180 gi; A0A0L8H8H0	0	1258.66	12	Not Found	High	High	Not Found	High	High	Not Found	High	High	High	2	0.4854	0	1	1	1	629.839	4.94	0.00311	27.8023	0.0008107	8.532e-05	1.411	3.77
High	Unambiguous	IRLENNEGVIVSEDDHR			6.66878e-06	0.00133933	2.354	1	2	9	A0A6P7TQ10	uncharacterized protein LOC115225177 OS=Octopus vulgaris OX=6645 GN=LOC115225177 PE=4 SV=1	Cluster-58773.57631;orf1 len=635 frame:1 start:112 end:2016 gi; A0A6P7TQ10	1	1994.99	17	High	High	High	High	High	High	High	High	High	High	3	0.7017	0	1	1	1	665.665	-4.45	-0.00296	34.8786	0.0008107	4.58e-07	2.354	5.33
High	Unambiguous	LSASDPQTTPVR			0.00060386	0.00133933	1.372	1	7	2	A0A6P7TKE4	probable aminopeptidase NPEPL1 isoform X1 OS=Octopus vulgaris OX=6645 GN=LOC115223934 PE=3 SV=1	Cluster-58773.184265;orf1 len=133 frame:-3 start:399 end:1 gi; A0A6P7TKE4; A0A6P7TNG7; Cluster-58773.200297;orf1 len=422 frame:3 start:3 end:1268 gi; Cluster-58773.200292;orf1 len=533 frame:3 start:3 end:1601 gi; Cluster-58773.200295;orf1 len=562 frame:3 start:3 end:1688 gi; Cluster-58773.200290;orf1 len=542 frame:3 start:3 end:1628 gi	0	1271.66	12	Not Found	High	High	Not Found	High	High	Not Found	High	High	High	2	0.4986	0	1	1	1	636.334	1.48	0.00094	28.2076	0.0008107	0.0001056	1.372	3.45
High	Unambiguous	LSELPAYELGQQVATR			3.18861e-05	0.00133933	2.013	1	3	2	A0A6P7SAW7	transketolase OS=Octopus vulgaris OX=6645 GN=LOC115210747 PE=4 SV=1	A0A0L8HW75; A0A6P7SAW7; Cluster-58773.128728;orf1 len=632 frame:1 start:466 end:2361 gi	0	1774.93	16	Not Found	High	Not Found	Not Found	High	Not Found	Not Found	High	Not Found	High	3	0.5826	0	1	1	1	592.317	1.26	0.00075	56.5734	0.0008107	3.041e-06	2.013	3.45
High	Unambiguous	ISFLNSETNR			0.00116897	0.00133933	1.228	4	5	3	A0A6P7SER3; Q9BJ58; O61363; A0A6P7SDC4	hemocyanin 1-like OS=Octopus vulgaris OX=6645 GN=LOC115212215 PE=4 SV=2 Hemocyanin G-type (Fragment) OS=Enteroctopus dofleini OX=267067 PE=4 SV=2 Hemocyanin G-type, units Oda to Odg OS=Enteroctopus dofleini OX=267067 GN=ODHCY PE=1 SV=1 hemocyanin G-type, units Oda to Odg OS=Octopus vulgaris OX=6645 GN=LOC115211670 PE=4 SV=2	A0A6P7SER3; Q9BJ58; O61363; A0A6P7SDC4; Q5XLV2	0	1180.6	10	Not Found	High	High	Not Found	High	High	Not Found	High	High	High	2	0.5361	0	1	1	1	590.806	7.83	0.00462	42.547	0.0008107	0.0002341	1.228	2.63
High	Unambiguous	ISFLNSETNRDPQPK			1.16727e-05	0.00133933	2.232	2	2	4	A0A6P7SER3; A0A6P7SDC4	hemocyanin 1-like OS=Octopus vulgaris OX=6645 GN=LOC115212215 PE=4 SV=2 hemocyanin G-type, units Oda to Odg OS=Octopus vulgaris OX=6645 GN=LOC115211670 PE=4 SV=2	A0A6P7SER3; A0A6P7SDC4	1	1745.88	15	Not Found	High	High	Not Found	High	High	Not Found	High	High	High	2	0.6858	0	1	1	1	873.446	1.39	0.00121	36.6959	0.0008107	9.006e-07	2.232	4.71
High	Unambiguous	ISGLDPSAPYFEHTGPK			0.00104713	0.00133933	1.252	1	5	1	A0A6P7SYQ3	pancreatic triacylglycerol lipase-like OS=Octopus vulgaris OX=6645 GN=LOC115217380 PE=3 SV=1	Cluster-58773.179287;orf1 len=509 frame:2 start:2 end:1528 gi; Cluster-58773.179288;orf1 len=486 frame:2 start:2 end:1459 gi; Cluster-58773.179284;orf1 len=164 frame:-3 start:493 end:2 gi; A0A6P7SYQ3; Cluster-58773.179285;orf1 len=361 frame:2 start:500 end:1582 gi	0	1815.89	17	Not Found	High	Not Found	Not Found	High	Not Found	Not Found	High	Not Found	High	3	0.4232	0	1	1	1	605.968	-0.7	-0.00042	47.5122	0.0008107	0.000205	1.252	3.97
High	Unambiguous	ISKEEIFGPVQQIIK			0.00151125	0.00133933	1.172	1	2	1	A0A6P7SYF3	retinal dehydrogenase 1 OS=Octopus vulgaris OX=6645 GN=LOC115217862 PE=3 SV=1	A0A6P7SYF3; Cluster-58773.188651;orf1 len=503 frame:2 start:653 end:2161 gi	1	1728.99	15	Not Found	High	Not Found	Not Found	High	Not Found	Not Found	High	Not Found	High	3	0.5427	0	1	1	1	577.001	-0.94	-0.00054	57.6224	0.0008107	0.000319	1.172	3.98
High	Unambiguous	LSLSEMNSLVHALK			0.000571514	0.00133933	1.384	4	6	3	A0A6P7SER3; A0A0L8FFZ3; A0A6P7SDC4; Cluster-58773.162319;orf1 len=2921 frame:3 start:24 end:8786 gi	hemocyanin 1-like OS=Octopus vulgaris OX=6645 GN=LOC115212215 PE=4 SV=2 Tyrosinase_Cu-bd domain-containing protein (Fragment) OS=Octopus bimaculoides OX=37653 GN=OCBIM_22022789mg PE=4 SV=1 hemocyanin G-type, units Oda to Odg OS=Octopus vulgaris OX=6645 GN=LOC115211670 PE=4 SV=2 16596797 gb|AAK28276.2| hemocyanin G-type [Enteroctopus dofleini]	A0A6P7SER3; A0A0L8FFZ3; Cluster-58773.162316;orf1 len=2526 frame:3 start:24 end:7601 gi; A0A6P7SDC4; Cluster-58773.162319;orf1 len=2921 frame:3 start:24 end:8786 gi; Cluster-58773.162305;orf1 len=76 frame:-1 start:229 end:2 gi	0	1541.84	14	Not Found	High	High	Not Found	High	High	Not Found	High	High	High	2	0.6788	0	1	1	1	771.421	-0.12	-9e-05	62.2062	0.0008107	9.909e-05	1.384	3.3
High	Unambiguous	LSLSEMNSLVHALK	1xOxidation [M6]	1xOxidation [M6]	0.00121266	0.00133933	1.22	4	6	4	A0A6P7SER3; A0A0L8FFZ3; A0A6P7SDC4; Cluster-58773.162319;orf1 len=2921 frame:3 start:24 end:8786 gi	hemocyanin 1-like OS=Octopus vulgaris OX=6645 GN=LOC115212215 PE=4 SV=2 Tyrosinase_Cu-bd domain-containing protein (Fragment) OS=Octopus bimaculoides OX=37653 GN=OCBIM_22022789mg PE=4 SV=1 hemocyanin G-type, units Oda to Odg OS=Octopus vulgaris OX=6645 GN=LOC115211670 PE=4 SV=2 16596797 gb|AAK28276.2| hemocyanin G-type [Enteroctopus dofleini]	A0A6P7SER3; A0A0L8FFZ3; Cluster-58773.162316;orf1 len=2526 frame:3 start:24 end:7601 gi; A0A6P7SDC4; Cluster-58773.162319;orf1 len=2921 frame:3 start:24 end:8786 gi; Cluster-58773.162305;orf1 len=76 frame:-1 start:229 end:2 gi	0	1557.83	14	High	High	High	High	High	High	High	High	High	High	3	0.5583	0	1	1	1	519.947	-2.49	-0.00129	46.8339	0.0008107	0.0002449	1.22	2.06
High	Unambiguous	LSLSEMNSLVHALKR			6.36969e-06	0.00133933	2.364	4	6	4	A0A6P7SER3; A0A0L8FFZ3; A0A6P7SDC4; Cluster-58773.162319;orf1 len=2921 frame:3 start:24 end:8786 gi	hemocyanin 1-like OS=Octopus vulgaris OX=6645 GN=LOC115212215 PE=4 SV=2 Tyrosinase_Cu-bd domain-containing protein (Fragment) OS=Octopus bimaculoides OX=37653 GN=OCBIM_22022789mg PE=4 SV=1 hemocyanin G-type, units Oda to Odg OS=Octopus vulgaris OX=6645 GN=LOC115211670 PE=4 SV=2 16596797 gb|AAK28276.2| hemocyanin G-type [Enteroctopus dofleini]	A0A6P7SER3; A0A0L8FFZ3; Cluster-58773.162316;orf1 len=2526 frame:3 start:24 end:7601 gi; A0A6P7SDC4; Cluster-58773.162319;orf1 len=2921 frame:3 start:24 end:8786 gi; Cluster-58773.162305;orf1 len=76 frame:-1 start:229 end:2 gi	1	1697.94	15	Not Found	High	High	Not Found	High	High	Not Found	High	High	High	3	0.5882	0	1	1	1	566.65	-0.75	-0.00042	56.7834	0.0008107	4.353e-07	2.364	4.25
High	Unambiguous	IQIPGIYDSVK			0.00201732	0.00133933	1.109	1	2	2	A0A6P7SJH5	cytosolic non-specific dipeptidase OS=Octopus vulgaris OX=6645 GN=LOC115213824 PE=3 SV=1	Cluster-58773.186313;orf1 len=502 frame:3 start:3 end:1508 gi; A0A6P7SJH5	0	1232.69	11	Not Found	High	High	Not Found	High	High	Not Found	High	High	High	2	0.4685	0	1	1	1	616.847	-1.47	-0.0009	56.3497	0.0008107	0.0004539	1.109	2.54
High	Unambiguous	LYVALVENELLAR			3.01778e-05	0.00133933	2.025	6	8	3	A0A6P7SER3; Q9BJ58; O61363; W6CNR9; A0A6P7SDC4; Cluster-58773.162319;orf1 len=2921 frame:3 start:24 end:8786 gi	hemocyanin 1-like OS=Octopus vulgaris OX=6645 GN=LOC115212215 PE=4 SV=2 Hemocyanin G-type (Fragment) OS=Enteroctopus dofleini OX=267067 PE=4 SV=2 Hemocyanin G-type, units Oda to Odg OS=Enteroctopus dofleini OX=267067 GN=ODHCY PE=1 SV=1 Hemocyanin subunit 3 OS=Sepia officinalis OX=6610 PE=2 SV=1 hemocyanin G-type, units Oda to Odg OS=Octopus vulgaris OX=6645 GN=LOC115211670 PE=4 SV=2 16596797 gb|A…	A0A6P7SER3; Cluster-58773.162316;orf1 len=2526 frame:3 start:24 end:7601 gi; Q9BJ58; O61363; W6CNR9; A0A6P7SDC4; Q5XLV2; Cluster-58773.162319;orf1 len=2921 frame:3 start:24 end:8786 gi	0	1502.86	13	Not Found	High	High	Not Found	High	High	Not Found	High	High	High	2	0.5413	0	1	1	1	751.934	1.54	0.00116	67.7356	0.0008107	2.831e-06	2.025	3.27
High	Unambiguous	IYVGEGELGNAGK			0.000432002	0.00133933	1.445	1	9	1	A0A7E6FE51	filamin-A isoform X1 OS=Octopus vulgaris OX=6645 GN=LOC115220251 PE=3 SV=1	Cluster-58773.156212;orf1 len=2403 frame:1 start:685 end:7893 gi; A0A0L8H0B6; A0A7E6FE51; A0A0L8H1I7; A0A0L8H0J5; A0A7E6FGP0; A0A0L8H0B8; A0A0L8H0C0; A0A0L8H027	0	1306.66	13	Not Found	High	Not Found	Not Found	High	Not Found	Not Found	High	Not Found	High	2	0.5588	0	1	1	1	653.836	0.78	0.00051	40.0449	0.0008107	7.033e-05	1.445	2.72
High	Unambiguous	IYYSGPNGIISPFHDIPLYSNTSK			0.000129243	0.00133933	1.708	1	4	2	A0A6P7SIX4	Inorganic diphosphatase OS=Octopus vulgaris OX=6645 GN=LOC115213471 PE=3 SV=2	Cluster-58773.174399;orf1 len=476 frame:3 start:30 end:1457 gi; A0A6P7SIX4; A0A0L8HPX8; Cluster-58773.174398;orf1 len=474 frame:3 start:30 end:1451 gi	0	2683.34	24	Not Found	High	High	Not Found	High	High	Not Found	High	High	High	3	0.5115	0	1	1	1	895.117	-0.96	-0.00086	65.4434	0.0008107	1.647e-05	1.708	3.48
High	Unambiguous	NHEDYKNDSVVSER			0.00134139	0.00133933	1.198	1	1	2	A0A6P7TS50	Glutamate--cysteine ligase OS=Octopus vulgaris OX=6645 GN=LOC115225878 PE=3 SV=2	A0A6P7TS50	1	1691.76	14	Not Found	High	High	Not Found	High	High	Not Found	High	High	High	3	0.7394	0	1	1	1	564.592	-1.02	-0.00058	19.1141	0.0008107	0.0002768	1.198	3.07
High	Unambiguous	NHEIGAAGLDVTEPEPLPK			2.70059e-06	0.00133933	2.551	1	4	1	A0A6P7T046	glyoxylate reductase/hydroxypyruvate reductase OS=Octopus vulgaris OX=6645 GN=LOC115218137 PE=3 SV=1	A0A6P7T046; Cluster-58773.124078;orf1 len=289 frame:3 start:54 end:920 gi; Q9BLF6; Cluster-58773.124080;orf1 len=344 frame:1 start:478 end:1509 gi	0	1987.01	19	Not Found	High	Not Found	Not Found	High	Not Found	Not Found	High	Not Found	High	3	0.6784	0	1	1	1	663.009	-0.49	-0.00032	47.6464	0.0008107	1.545e-07	2.551	5.1
High	Unambiguous	NKDPINENVVDLLQNSK			4.31646e-05	0.00133933	1.947	1	5	1	A0A6P7TRC4	myosin heavy chain, striated muscle OS=Octopus vulgaris OX=6645 GN=LOC115225111 PE=3 SV=2	V6A729; Cluster-58773.160860;orf1 len=1941 frame:2 start:4361 end:10183 sp; A0A0L8H7J6; Cluster-58773.165092;orf1 len=1029 frame:-1 start:3088 end:2 gi; A0A6P7TRC4	1	1940.01	17	Not Found	High	Not Found	Not Found	High	Not Found	Not Found	High	Not Found	High	3	0.6208	0	1	1	1	647.341	0.2	0.00013	54.0279	0.0008107	4.37e-06	1.947	4.51
High	Unambiguous	NKLEEDLTTLQK			0.000235753	0.00133933	1.577	3	34	2	A0A7E6EQL5; A0A7E6EQM0; A0A7E6ET70	tropomyosin Tod p 1.0102 isoform X3 OS=Octopus vulgaris OX=6645 GN=LOC115210626 PE=3 SV=1 tropomyosin Tod p 1.0102 isoform X10 OS=Octopus vulgaris OX=6645 GN=LOC115210626 PE=3 SV=1 tropomyosin Tod p 1.0102 isoform X27 OS=Octopus vulgaris OX=6645 GN=LOC115210626 PE=3 SV=1	A0A7E6ESN7; A0A7E6ESP2; A0A7E6ERK8; A0A7E6ERJ4; Cluster-58773.159342;orf2 len=257 frame:3 start:672 end:1442 gi; A0A7E6EQM7; A0A7E6EQL5; A0A7E6ESM7; A0A6P7SAR7; A0A7E6EQN2; A0A7E6EQM4; A0A7E6ERL1; A0A7E6ERK2; A0A7E6ERJ7; A0A7E6ERJ9; A0A7E6ET67; Cluster-58773.159343;orf1 len=290 frame:-2 start:953 end:84 gi; Cluster-58773.159326;orf1 len=288 frame:3 start:672 end:1535 gi; A0A7E6ET75; A0A7E6ESM2; A…	1	1431.77	12	Not Found	High	Not Found	Not Found	High	Not Found	Not Found	High	Not Found	High	2	0.5826	0	1	1	1	716.389	0.85	0.00061	40.8339	0.0008107	3.401e-05	1.577	3.45
High	Unambiguous	NKLEEDLTTLQKK			0.00142379	0.00133933	1.185	3	34	1	A0A7E6EQL5; A0A7E6EQM0; A0A7E6ET70	tropomyosin Tod p 1.0102 isoform X3 OS=Octopus vulgaris OX=6645 GN=LOC115210626 PE=3 SV=1 tropomyosin Tod p 1.0102 isoform X10 OS=Octopus vulgaris OX=6645 GN=LOC115210626 PE=3 SV=1 tropomyosin Tod p 1.0102 isoform X27 OS=Octopus vulgaris OX=6645 GN=LOC115210626 PE=3 SV=1	A0A7E6ESN7; A0A7E6ESP2; A0A7E6ERK8; A0A7E6ERJ4; Cluster-58773.159342;orf2 len=257 frame:3 start:672 end:1442 gi; A0A7E6EQM7; A0A7E6EQL5; A0A7E6ESM7; A0A6P7SAR7; A0A7E6EQN2; A0A7E6EQM4; A0A7E6ERL1; A0A7E6ERK2; A0A7E6ERJ7; A0A7E6ERJ9; A0A7E6ET67; Cluster-58773.159343;orf1 len=290 frame:-2 start:953 end:84 gi; Cluster-58773.159326;orf1 len=288 frame:3 start:672 end:1535 gi; A0A7E6ET75; A0A7E6ESM2; A…	2	1559.86	13	Not Found	High	Not Found	Not Found	High	Not Found	Not Found	High	Not Found	High	3	0.4738	0	1	1	1	520.626	-1.03	-0.00053	35.3287	0.0008107	0.0002972	1.185	3.63
High	Unambiguous	NLDDHTIEFLIQANDDSDTVK			8.01235e-06	0.00133933	2.314	1	2	2	A0A7E6EUU7	uncharacterized protein LOC118763595 OS=Octopus vulgaris OX=6645 GN=LOC118763595 PE=4 SV=1	A0A7E6EUU7; Cluster-58773.92568;orf1 len=116 frame:-1 start:402 end:55 gi	0	2403.13	21	Not Found	High	Not Found	Not Found	High	Not Found	Not Found	High	Not Found	High	3	0.5385	0	1	1	1	801.716	1.57	0.00126	64.3166	0.0008107	5.711e-07	2.314	5.07
High	Unambiguous	NLDIERPSYTNLNR			0.00034661	0.00133933	1.493	2	15	1	A0A0L8HN06; Q06331	Tubulin alpha chain OS=Octopus bimaculoides OX=37653 GN=OCBIM_22010928mg PE=3 SV=1 Tubulin alpha chain OS=Enteroctopus dofleini OX=267067 PE=2 SV=1	A0A0L8HN06; A0A6P7TPX0; A0A812EFV9; A0A0L8G5J8; P24635; A0A0L8HMY5; F6JYC8; A0A812DIH7; Q06331; A0A6P7SU98; A0A812CDP3; Cluster-58773.153179;orf1 len=311 frame:-2 start:1021 end:89 gi; Cluster-58773.153164;orf1 len=457 frame:2 start:386 end:1756 gi; I0JGU2; A0A6P7STF6	0	1704.87	14	Not Found	High	Not Found	Not Found	High	Not Found	Not Found	High	Not Found	High	3	0.2821	0	1	1	1	568.96	-0.47	-0.00027	42.0864	0.0008107	5.395e-05	1.493	4.29
High	Unambiguous	NLHGDSPYLIMFGPDICGPGTK	1xCarbamidomethyl [C17]; 1xOxidation [M11]	1xCarbamidomethyl [C17]; 1xOxidation [M11]	7.03322e-08	0.00133933	3.346	1	4	1	A0A7E6F2W5	Calreticulin OS=Octopus vulgaris OX=6645 GN=LOC115215618 PE=3 SV=1	Cluster-58773.173059;orf2 len=242 frame:2 start:863 end:1588 gi; A0A7E6F2W5; A0A0L8I919; A0A812DBC4	0	2405.13	22	Not Found	Not Found	High	Not Found	Not Found	High	Not Found	Not Found	High	High	3	0.703	0	1	1	1	802.381	0.64	0.00052	58.8665	0.0008107	1.888e-09	3.346	5.59
High	Unambiguous	NLIEQEHPESEQIAVR			4.41664e-05	0.00133933	1.942	1	4	1	A0A6P7SVM2	Spectrin beta chain OS=Octopus vulgaris OX=6645 GN=LOC115216977 PE=3 SV=1	Cluster-58773.164992;orf1 len=2325 frame:1 start:1603 end:8577 gi; A0A6P7SVM2; Cluster-58773.164998;orf1 len=1254 frame:2 start:4973 end:8734 gi; A0A7E6F8D4	0	1891.95	16	Not Found	High	Not Found	Not Found	High	Not Found	Not Found	High	Not Found	High	3	0.5892	0	1	1	1	631.322	0.4	0.00025	38.7504	0.0008107	4.506e-06	1.942	3.53
High	Unambiguous	NIIHGSDGTESATR			2.69071e-05	0.00133933	2.05	1	3	5	Cluster-58773.127031;orf1 len=154 frame:-3 start:549 end:88 gi	405978782 gb|EKC43144.1| Nucleoside diphosphate kinase B [Crassostrea gigas]	Cluster-58773.127031;orf1 len=154 frame:-3 start:549 end:88 gi; A0A6P7TQK0; Cluster-58773.127032;orf1 len=154 frame:1 start:67 end:528 gi	0	1457.7	14	Not Found	High	High	Not Found	High	High	Not Found	High	High	High	3	0.5795	0	1	1	1	486.57	-2.46	-0.0012	20.2508	0.0008107	2.468e-06	2.05	4.59
High	Unambiguous	NINEVENQILTR			0.000964148	0.00133933	1.27	1	8	1	A0A6P7SH66	alpha-actinin, sarcomeric isoform X3 OS=Octopus vulgaris OX=6645 GN=LOC115212896 PE=4 SV=1	A0A6P7SH66; A0A6P7SGJ6; Cluster-58773.154027;orf1 len=81 frame:-1 start:248 end:6 gi; A0A6P7SHV3; A0A812C5K7; A0A0L8GPG8; Cluster-58773.154028;orf1 len=180 frame:-1 start:540 end:1 gi; Cluster-58773.163787;orf1 len=893 frame:3 start:2145 end:4823 gi	0	1442.76	12	Not Found	High	Not Found	Not Found	High	Not Found	Not Found	High	Not Found	High	2	0.5671	0	1	1	1	721.884	1.1	0.00079	49.4154	0.0008107	0.0001858	1.27	3.95
High	Unambiguous	NGFGAAGIIYSHSGIR			2.11757e-06	0.00133933	2.604	2	6	24	Cluster-58773.132244;orf1 len=954 frame:2 start:176 end:3037 gi; A0A0L8FXZ4	159006 gb|AAA16244.1| peroxidase-like protein, partial [Euprymna scolopes] Uncharacterized protein OS=Octopus bimaculoides OX=37653 GN=OCBIM_22004572mg PE=4 SV=1	Cluster-58773.132244;orf1 len=954 frame:2 start:176 end:3037 gi; A0A7E6FIS1; Cluster-58773.132246;orf1 len=948 frame:2 start:176 end:3019 gi; A0A0L8FXZ4; Cluster-58773.132245;orf1 len=864 frame:2 start:176 end:2767 gi; Cluster-58773.132247;orf1 len=433 frame:-1 start:1324 end:26 gi	0	1619.83	16	High	High	High	High	High	High	High	High	High	High	2	0.654	0	1	1	1	810.415	-3.26	-0.00264	48.1152	0.0008107	1.149e-07	2.604	5
High	Unambiguous	NLNSLNTGHIESLR			4.90825e-05	0.00133933	1.919	1	2	5	Cluster-58773.162319;orf1 len=2921 frame:3 start:24 end:8786 gi	16596797 gb|AAK28276.2| hemocyanin G-type [Enteroctopus dofleini]	Cluster-58773.162316;orf1 len=2526 frame:3 start:24 end:7601 gi; Cluster-58773.162319;orf1 len=2921 frame:3 start:24 end:8786 gi	0	1567.82	14	High	High	High	High	High	High	High	High	High	High	2	0.5061	0	1	1	1	784.412	-0.71	-0.00056	39.5754	0.0008107	5.11e-06	1.919	4.11
High	Unambiguous	NNDNNHLVNNFRPVMPLGNR			0.00135375	0.00133933	1.196	1	1	1	Cluster-58773.198809;orf1 len=296 frame:2 start:149 end:1036 gi	871209239 ref|XP_012941697.1| PREDICTED: carbonic anhydrase 1-like [Aplysia californica]	Cluster-58773.198809;orf1 len=296 frame:2 start:149 end:1036 gi	0	2335.15	20	Not Found	High	Not Found	Not Found	High	Not Found	Not Found	High	Not Found	High	4	0.5231	0	1	1	1	584.542	-0.91	-0.00053	46.826	0.0008107	0.0002802	1.196	3.25
High	Unambiguous	NNHENADEQADKEQQEAIEQIDEVQNEIDR			0.000900042	0.00133933	1.285	1	7	2	A0A0L8IEX1	Uncharacterized protein OS=Octopus bimaculoides OX=37653 GN=OCBIM_22014847mg PE=3 SV=1	A0A0L8IEX1; A0A812CMT3; A0A812CPB0; A0A6P7TR26; Cluster-58773.163006;orf1 len=293 frame:2 start:1130 end:2008 gi; A0A0L8IDP3; Cluster-58773.163005;orf2 len=109 frame:2 start:1130 end:1456 gi	1	3551.58	30	Not Found	High	Not Found	Not Found	High	Not Found	Not Found	High	Not Found	High	4	0.6219	0	1	1	1	888.651	1.4	0.00125	57.0249	0.0008107	0.0001712	1.285	3.65
High	Unambiguous	NNPFHHAHIDVANKDTTR			9.40825e-06	0.00133933	2.279	2	2	7	A0A6P7SDC4; Cluster-58773.162319;orf1 len=2921 frame:3 start:24 end:8786 gi	hemocyanin G-type, units Oda to Odg OS=Octopus vulgaris OX=6645 GN=LOC115211670 PE=4 SV=2 16596797 gb|AAK28276.2| hemocyanin G-type [Enteroctopus dofleini]	A0A6P7SDC4; Cluster-58773.162319;orf1 len=2921 frame:3 start:24 end:8786 gi	1	2087.02	18	Not Found	High	High	Not Found	High	High	Not Found	High	High	High	3	0.6527	0	1	1	1	696.349	7.11	0.00495	22.039	0.0008107	6.965e-07	2.279	5.47
High	Unambiguous	NNQGVIDVEDLR			0.00178246	0.00133933	1.136	1	6	1	A0A6P7SK96	troponin C isoform X2 OS=Octopus vulgaris OX=6645 GN=LOC115213894 PE=4 SV=1	Cluster-58773.136607;orf1 len=149 frame:3 start:558 end:1004 gi; A0A6P7SK96; A0A0L8HY27; A0A6P7SL38; Q9BLG0; Cluster-58773.136610;orf1 len=128 frame:1 start:1 end:384 gi	0	1371.69	12	Not Found	High	Not Found	Not Found	High	Not Found	Not Found	High	Not Found	High	2	0.4554	0	1	1	1	686.347	0.81	0.00055	49.229	0.0008107	0.0003899	1.136	3.36
High	Unambiguous	NPDAQEGGELILGGTDPK			5.29665e-07	0.00133933	2.906	1	3	1	A0A6P7SDM4	lysosomal aspartic protease isoform X2 OS=Octopus vulgaris OX=6645 GN=LOC115211653 PE=3 SV=1	Cluster-58773.170275;orf1 len=430 frame:1 start:82 end:1371 gi; A0A6P7SDM4; A0A6P7SCT9	0	1810.88	18	Not Found	High	Not Found	Not Found	High	Not Found	Not Found	High	Not Found	High	2	0.7415	0	1	1	1	905.944	-0.14	-0.00012	48.5724	0.0008107	2.161e-08	2.906	4.72
High	Unambiguous	NQLTGEYGGVPDTAR			1.65282e-06	0.00133933	2.658	1	5	1	A0A6P7T656	Aconitate hydratase, mitochondrial OS=Octopus vulgaris OX=6645 GN=LOC115219777 PE=3 SV=1	Cluster-58773.174873;orf1 len=199 frame:-1 start:642 end:46 gi; Cluster-58773.174878;orf1 len=774 frame:1 start:127 end:2448 gi; A0A0L8HKW4; Cluster-58773.174871;orf1 len=801 frame:1 start:127 end:2529 gi; A0A6P7T656	0	1577.76	15	Not Found	High	Not Found	Not Found	High	Not Found	Not Found	High	Not Found	High	2	0.6247	0	1	1	1	789.381	-0.35	-0.00028	39.7978	0.0008107	8.509e-08	2.658	3.97
High	Unambiguous	NQVAYGVTTGFGNFAR			9.06914e-06	0.00133933	2.287	1	5	2	Cluster-58773.13946;orf1 len=533 frame:1 start:406 end:2004 gi	260800011 ref|XP_002594930.1| hypothetical protein BRAFLDRAFT_209115 [Branchiostoma floridae]>gi|229280168|gb|EEN50941.1| hypothetical protein BRAFLDRAFT_209115 [Branchiostoma floridae]	Cluster-58773.13945;orf1 len=525 frame:1 start:406 end:1980 gi; Cluster-58773.13944;orf1 len=142 frame:-1 start:428 end:3 gi; Cluster-58773.13946;orf1 len=533 frame:1 start:406 end:2004 gi; A0A0L8IE74; A0A6P7SAD4	0	1701.83	16	Not Found	High	High	Not Found	High	High	Not Found	High	High	High	2	0.6731	0	1	1	1	851.422	1.04	0.00088	55.3917	0.0008107	6.651e-07	2.287	4.16
High	Unambiguous	NQYDNDVTVWSPQGR			0.000105615	0.00133933	1.752	1	4	1	A0A0L8H0K9	Proteasome subunit alpha type OS=Octopus bimaculoides OX=37653 GN=OCBIM_22024847mg PE=3 SV=1	A0A812DHH7; A0A0L8H0K9; Cluster-58773.110606;orf1 len=300 frame:2 start:98 end:997 gi; A0A6P7TCP5	0	1778.81	15	Not Found	High	Not Found	Not Found	High	Not Found	Not Found	High	Not Found	High	2	0.6524	0	1	1	1	889.91	1.86	0.00165	49.028	0.0008107	1.286e-05	1.752	4.2
High	Unambiguous	NSDEVIDYNGAR			0.000278096	0.00133933	1.541	1	7	1	A0A6P7TYN8	Protein disulfide-isomerase OS=Octopus vulgaris OX=6645 GN=LOC115231769 PE=3 SV=1	Cluster-58773.171208;orf1 len=289 frame:3 start:3066 end:3932 gi; A0A0L8FZT7; Cluster-58773.171212;orf1 len=456 frame:2 start:752 end:2119 gi; Cluster-58773.171210;orf1 len=520 frame:1 start:562 end:2121 gi; Cluster-58773.171213;orf1 len=297 frame:3 start:2916 end:3806 gi; Cluster-58773.171211;orf1 len=301 frame:3 start:123 end:1025 gi; A0A6P7TYN8	0	1352.61	12	Not Found	High	Not Found	Not Found	High	Not Found	Not Found	High	Not Found	High	2	0.6439	0	1	1	1	676.807	-0.52	-0.00035	35.3324	0.0008107	4.152e-05	1.541	4.24
High	Unambiguous	NSVGPDGYVADEIVTSR			2.24565e-07	0.00133933	3.093	1	5	3	A0A6P7U7W9	putative aminopeptidase W07G4.4 isoform X1 OS=Octopus vulgaris OX=6645 GN=LOC115232621 PE=3 SV=1	A0A812CXA8; Cluster-58773.206032;orf1 len=531 frame:1 start:643 end:2235 gi; A0A7E6FRC1; A0A0L8ICB5; A0A6P7U7W9	0	1778.86	17	Not Found	High	High	Not Found	High	High	Not Found	High	High	High	2	0.6882	0	1	1	1	889.933	1.42	0.00126	51.1227	0.0008107	7.664e-09	3.093	4.65
High	Unambiguous	NVFYSGDIAFEQK			0.00104713	0.00133933	1.252	3	4	6	A0A6P7SER3; A0A6P7SDC4; Cluster-58773.162319;orf1 len=2921 frame:3 start:24 end:8786 gi	hemocyanin 1-like OS=Octopus vulgaris OX=6645 GN=LOC115212215 PE=4 SV=2 hemocyanin G-type, units Oda to Odg OS=Octopus vulgaris OX=6645 GN=LOC115211670 PE=4 SV=2 16596797 gb|AAK28276.2| hemocyanin G-type [Enteroctopus dofleini]	A0A6P7SER3; Cluster-58773.162316;orf1 len=2526 frame:3 start:24 end:7601 gi; A0A6P7SDC4; Cluster-58773.162319;orf1 len=2921 frame:3 start:24 end:8786 gi	0	1517.73	13	Not Found	High	High	Not Found	High	High	Not Found	High	High	High	2	0.4863	0	1	1	1	759.368	0.79	0.0006	55.4413	0.0008107	0.0002058	1.252	2.92
High	Unambiguous	NNAATEYDPTDK			0.000887741	0.00133933	1.288	1	7	1	A0A0L8GUX3	Uncharacterized protein OS=Octopus bimaculoides OX=37653 GN=OCBIM_22027429mg PE=3 SV=1	Cluster-58773.174949;orf1 len=282 frame:3 start:408 end:1253 gi; Cluster-58773.174951;orf1 len=236 frame:3 start:966 end:1673 gi; Cluster-58773.174947;orf1 len=413 frame:3 start:174 end:1412 gi; Cluster-58773.174946;orf1 len=366 frame:-3 start:1129 end:32 gi; Cluster-58773.174950;orf1 len=419 frame:3 start:174 end:1430 gi; A0A0L8GUX3; A0A6P7SJW4	0	1338.58	12	Not Found	High	Not Found	Not Found	High	Not Found	Not Found	High	Not Found	High	2	0.6406	0	1	1	1	669.794	-0.49	-0.00033	26.2253	0.0008107	0.0001683	1.288	2.81
High	Unambiguous	NDNVVGFSSPVEQEAVRK			0.000155995	0.00133933	1.667	1	7	2	Cluster-58773.162759;orf1 len=276 frame:2 start:2 end:829 gi	524875728 ref|XP_005094588.1| PREDICTED: uncharacterized protein LOC101847027 isoform X1 [Aplysia californica]>gi|524875730|ref|XP_005094589.1| PREDICTED: uncharacterized protein LOC101847027 isoform X1 [Aplysia californica]	Cluster-58773.162758;orf1 len=241 frame:3 start:63 end:785 gi; A0A6P7S796; Cluster-58773.162761;orf1 len=247 frame:3 start:132 end:872 gi; Cluster-58773.162759;orf1 len=276 frame:2 start:2 end:829 gi; Cluster-58773.162766;orf1 len=259 frame:2 start:83 end:859 gi; Cluster-58773.162769;orf1 len=258 frame:2 start:68 end:841 gi; Cluster-58773.120229;orf1 len=194 frame:-3 start:584 end:3 gi	1	1974.99	18	Not Found	High	High	Not Found	High	High	Not Found	High	High	High	3	0.6995	0	1	1	1	659	-1.42	-0.00093	42.9591	0.0008107	2.06e-05	1.667	4.36
High	Unambiguous	NDNVVGFSSPVEQEAVR			2.0152e-05	0.00133933	2.113	1	7	2	Cluster-58773.162759;orf1 len=276 frame:2 start:2 end:829 gi	524875728 ref|XP_005094588.1| PREDICTED: uncharacterized protein LOC101847027 isoform X1 [Aplysia californica]>gi|524875730|ref|XP_005094589.1| PREDICTED: uncharacterized protein LOC101847027 isoform X1 [Aplysia californica]	Cluster-58773.162758;orf1 len=241 frame:3 start:63 end:785 gi; A0A6P7S796; Cluster-58773.162761;orf1 len=247 frame:3 start:132 end:872 gi; Cluster-58773.162759;orf1 len=276 frame:2 start:2 end:829 gi; Cluster-58773.162766;orf1 len=259 frame:2 start:83 end:859 gi; Cluster-58773.162769;orf1 len=258 frame:2 start:68 end:841 gi; Cluster-58773.120229;orf1 len=194 frame:-3 start:584 end:3 gi	0	1846.89	17	Not Found	High	High	Not Found	High	High	Not Found	High	High	High	2	0.7224	0	1	1	1	923.951	0.62	0.00057	50.5854	0.0008107	1.745e-06	2.113	3.53
High	Unambiguous	NDGRYEEIAAFHGLPAQCPNKDGSK	1xCarbamidomethyl [C18]	1xCarbamidomethyl [C18]	8.86344e-06	0.00133933	2.292	3	4	2	A0A6P7SER3; A0A6P7SDC4; Cluster-58773.162319;orf1 len=2921 frame:3 start:24 end:8786 gi	hemocyanin 1-like OS=Octopus vulgaris OX=6645 GN=LOC115212215 PE=4 SV=2 hemocyanin G-type, units Oda to Odg OS=Octopus vulgaris OX=6645 GN=LOC115211670 PE=4 SV=2 16596797 gb|AAK28276.2| hemocyanin G-type [Enteroctopus dofleini]	A0A6P7SER3; Cluster-58773.162316;orf1 len=2526 frame:3 start:24 end:7601 gi; A0A6P7SDC4; Cluster-58773.162319;orf1 len=2921 frame:3 start:24 end:8786 gi	2	2774.3	25	Not Found	Not Found	High	Not Found	Not Found	High	Not Found	Not Found	High	High	4	0.6302	0	1	1	1	694.328	-2.08	-0.00145	40.5007	0.0008107	6.462e-07	2.292	5.49
High	Unambiguous	MAALSNEEMLAALHQPDPATK	1xMet-loss+Acetyl [N-Term]	1xMet-loss+Acetyl [N-Term]	8.7905e-05	0.00133933	1.792	1	2	2	A0A6P7T9I0	Glyoxalase I OS=Octopus vulgaris OX=6645 GN=LOC115221453 PE=3 SV=1	A0A0L8GU71; A0A6P7T9I0	0	2149.06	21	Not Found	High	Not Found	Not Found	High	Not Found	Not Found	High	Not Found	High	3	0.5641	0	1	1	1	717.025	0.37	0.00027	62.9772	0.0008107	1.029e-05	1.792	3.9
High	Unambiguous	MAQLLAQPGAGELQR	1xMet-loss+Acetyl [N-Term]	1xMet-loss+Acetyl [N-Term]	9.76895e-05	0.00133933	1.769	1	2	1	A0A0L8GJH5	Pyruvate kinase OS=Octopus bimaculoides OX=37653 GN=OCBIM_22032473mg PE=3 SV=1	A0A6P7T8Q7; A0A0L8GJH5	0	1493.81	15	Not Found	High	Not Found	Not Found	High	Not Found	Not Found	High	Not Found	High	2	0.6809	0	1	1	1	747.408	0.6	0.00044	62.1018	0.0008107	1.169e-05	1.769	3.29
High	Unambiguous	MATVDTADDSQKR	1xMet-loss+Acetyl [N-Term]	1xMet-loss+Acetyl [N-Term]	0.000168651	0.00133933	1.65	1	3	1	Cluster-58773.105280;orf1 len=426 frame:1 start:307 end:1584 gi	827883539 dbj|BAR90777.1| beta arrestin [Idiosepius paradoxus]	Cluster-58773.105280;orf1 len=426 frame:1 start:307 end:1584 gi; Cluster-58773.105275;orf1 len=289 frame:1 start:307 end:1173 gi; Cluster-58773.105282;orf1 len=319 frame:1 start:307 end:1263 gi	1	1348.63	13	Not Found	High	Not Found	Not Found	High	Not Found	Not Found	High	Not Found	High	2	0.6607	0	1	1	1	674.822	2.13	0.00144	22.4496	0.0008107	2.264e-05	1.65	3.36
High	Unambiguous	MDITHVIHK	1xOxidation [M1]	1xOxidation [M1]	0.000982001	0.00133933	1.266	3	4	1	A0A6P7SER3; A0A6P7SDC4; Cluster-58773.162319;orf1 len=2921 frame:3 start:24 end:8786 gi	hemocyanin 1-like OS=Octopus vulgaris OX=6645 GN=LOC115212215 PE=4 SV=2 hemocyanin G-type, units Oda to Odg OS=Octopus vulgaris OX=6645 GN=LOC115211670 PE=4 SV=2 16596797 gb|AAK28276.2| hemocyanin G-type [Enteroctopus dofleini]	A0A6P7SER3; Cluster-58773.162316;orf1 len=2526 frame:3 start:24 end:7601 gi; A0A6P7SDC4; Cluster-58773.162319;orf1 len=2921 frame:3 start:24 end:8786 gi	0	1109.58	9	Not Found	Not Found	High	Not Found	Not Found	High	Not Found	Not Found	High	High	2	0.6334	0	1	1	1	555.292	-1.32	-0.00073	23.2296	0.0008107	0.0001902	1.266	3.11
High	Unambiguous	MESLIDKVDASK	1xAcetyl [N-Term]	1xAcetyl [N-Term]	0.000220073	0.00133933	1.592	1	1	1	A0A7E6EUU7	uncharacterized protein LOC118763595 OS=Octopus vulgaris OX=6645 GN=LOC118763595 PE=4 SV=1	A0A7E6EUU7	1	1377.69	12	Not Found	High	Not Found	Not Found	High	Not Found	Not Found	High	Not Found	High	2	0.5161	0	1	1	1	689.35	-0.49	-0.00034	62.2095	0.0008107	3.116e-05	1.592	3.41
High	Unambiguous	MGQHNIGINGFGR	1xMet-loss [N-Term]	1xMet-loss [N-Term]	0.000127476	0.00133933	1.711	1	1	2	A0A6P7T066	Glyceraldehyde-3-phosphate dehydrogenase OS=Octopus vulgaris OX=6645 GN=LOC115217845 PE=3 SV=1	A0A6P7T066	0	1269.64	13	Not Found	High	Not Found	Not Found	High	Not Found	Not Found	High	Not Found	High	2	0.3787	0	1	1	1	635.326	0.69	0.00044	33.5572	0.0008107	1.615e-05	1.711	3.01
High	Unambiguous	MGQHNIGINGFGR	1xMet-loss+Acetyl [N-Term]	1xMet-loss+Acetyl [N-Term]	0.000332589	0.00133933	1.502	1	1	1	A0A6P7T066	Glyceraldehyde-3-phosphate dehydrogenase OS=Octopus vulgaris OX=6645 GN=LOC115217845 PE=3 SV=1	A0A6P7T066	0	1311.66	13	Not Found	High	Not Found	Not Found	High	Not Found	Not Found	High	Not Found	High	2	0.6408	0	1	1	1	656.331	-0.74	-0.00048	43.9612	0.0008107	5.145e-05	1.502	4.12
High	Unambiguous	MHIPLEDLYVHGSTIHLEVVIETVDGK	1xOxidation [M1]	1xOxidation [M1]	5.2773e-06	0.00133933	2.405	2	2	6	A0A6P7SER3; A0A6P7SDC4	hemocyanin 1-like OS=Octopus vulgaris OX=6645 GN=LOC115212215 PE=4 SV=2 hemocyanin G-type, units Oda to Odg OS=Octopus vulgaris OX=6645 GN=LOC115211670 PE=4 SV=2	A0A6P7SER3; A0A6P7SDC4	0	3060.57	27	Not Found	Not Found	High	Not Found	Not Found	High	Not Found	Not Found	High	High	4	0.4636	0	1	1	1	765.899	1.49	0.00114	67.6785	0.0008107	3.453e-07	2.405	5.35
High	Unambiguous	MLHNYIEDTDFK	1xOxidation [M1]	1xOxidation [M1]	0.00073554	0.00133933	1.329	1	5	2	Cluster-58773.88130;orf1 len=870 frame:3 start:327 end:2936 gi	762145751 ref|XP_011456155.1| PREDICTED: puromycin-sensitive aminopeptidase-like [Crassostrea gigas]	A0A6P7TEW0; Cluster-58773.88131;orf1 len=838 frame:1 start:325 end:2838 gi; Cluster-58773.88135;orf1 len=833 frame:1 start:325 end:2823 gi; Cluster-58773.88130;orf1 len=870 frame:3 start:327 end:2936 gi; A0A0L8GAS1	0	1541.69	12	Not Found	Not Found	High	Not Found	Not Found	High	Not Found	Not Found	High	High	2	0.524	0	1	1	1	771.349	-2.06	-0.00158	41.5853	0.0008107	0.0001337	1.329	2.5
High	Unambiguous	MLRDDTSVLPNKFEIIADLHNGQVTNSAHGGPGFLPWHR	1xOxidation [M1]	1xOxidation [M1]	0.000982001	0.00133933	1.266	1	3	2	A0A6P7TQ10	uncharacterized protein LOC115225177 OS=Octopus vulgaris OX=6645 GN=LOC115225177 PE=4 SV=1	Cluster-58773.57631;orf1 len=635 frame:1 start:112 end:2016 gi; Cluster-58773.251579;orf1 len=180 frame:-2 start:541 end:2 gi; A0A6P7TQ10	2	4356.17	39	Not Found	Not Found	High	Not Found	Not Found	High	Not Found	Not Found	High	High	6	0.5734	0	1	1	1	726.868	0.35	0.00025	59.1933	0.0008107	0.0001905	1.266	5.86
High	Unambiguous	MPSSQINVPEDPVPSGDYK			0.000502618	0.00133933	1.412	1	3	1	A0A6P7T0X7	ganglioside GM2 activator OS=Octopus vulgaris OX=6645 GN=LOC115218607 PE=4 SV=1	Cluster-58773.150171;orf1 len=135 frame:2 start:95 end:499 gi; A0A6P7T0X7; Cluster-58773.150169;orf1 len=114 frame:-2 start:365 end:24 gi	0	2059.96	19	Not Found	High	Not Found	Not Found	High	Not Found	Not Found	High	Not Found	High	2	0.6582	0	1	1	1	1030.49	0.18	0.00019	50.5475	0.0008107	8.464e-05	1.412	3.54
High	Unambiguous	MPSSQINVPEDPVPSGDYK	1xOxidation [M1]	1xOxidation [M1]	0.000692958	0.00133933	1.342	1	3	2	A0A6P7T0X7	ganglioside GM2 activator OS=Octopus vulgaris OX=6645 GN=LOC115218607 PE=4 SV=1	Cluster-58773.150171;orf1 len=135 frame:2 start:95 end:499 gi; A0A6P7T0X7; Cluster-58773.150169;orf1 len=114 frame:-2 start:365 end:24 gi	0	2075.96	19	Not Found	Not Found	High	Not Found	Not Found	High	Not Found	Not Found	High	High	2	0.6027	0	1	1	1	1038.48	0.82	0.00086	47.3591	0.0008107	0.0001245	1.342	3.75
High	Unambiguous	MQGSINDGTALK	1xOxidation [M1]	1xOxidation [M1]	0.000359569	0.00133933	1.485	1	3	1	Cluster-58773.83035;orf1 len=470 frame:3 start:477 end:1886 gi	554820859 ref|XP_005921157.1| PREDICTED: thymidine phosphorylase-like isoform X1 [Haplochromis burtoni]	Cluster-58773.83034;orf1 len=420 frame:3 start:477 end:1736 gi; A0A6P7TUW4; Cluster-58773.83035;orf1 len=470 frame:3 start:477 end:1886 gi	0	1250.6	12	Not Found	Not Found	High	Not Found	Not Found	High	Not Found	Not Found	High	High	2	0.658	0	1	1	1	625.807	1.99	0.00124	26.4161	0.0008107	5.641e-05	1.485	3.07
High	Unambiguous	MSQTLQDVGHSIGDLFEISNIRR	1xOxidation [M1]	1xOxidation [M1]	2.65393e-05	0.00133933	2.053	1	3	2	A0A6P7U7W9	putative aminopeptidase W07G4.4 isoform X1 OS=Octopus vulgaris OX=6645 GN=LOC115232621 PE=3 SV=1	Cluster-58773.206032;orf1 len=531 frame:1 start:643 end:2235 gi; A0A7E6FRC1; A0A6P7U7W9	1	2632.31	23	Not Found	Not Found	High	Not Found	Not Found	High	Not Found	Not Found	High	High	4	0.564	0	1	1	1	658.835	0.62	0.00041	64.454	0.0008107	2.436e-06	2.053	5.94
High	Unambiguous	MTTTTTTAPRPFLDEIK	1xMet-loss+Acetyl [N-Term]	1xMet-loss+Acetyl [N-Term]	0.000364552	0.00133933	1.482	1	1	1	A0A6P7T9Z5	thymosin beta isoform X2 OS=Octopus vulgaris OX=6645 GN=LOC115221752 PE=3 SV=1	A0A6P7T9Z5	0	1833.96	17	Not Found	High	Not Found	Not Found	High	Not Found	Not Found	High	Not Found	High	2	0.4987	0	1	1	1	917.484	1.32	0.00121	55.7007	0.0008107	5.757e-05	1.482	3.87
High	Unambiguous	MTTYTDKGEKPESGR	1xMet-loss+Acetyl [N-Term]	1xMet-loss+Acetyl [N-Term]	0.000244568	0.00133933	1.569	1	1	3	A0A7E6FT44	4-hydroxyphenylpyruvate dioxygenase OS=Octopus vulgaris OX=6645 GN=LOC115226087 PE=3 SV=1	A0A7E6FT44	1	1610.77	15	Not Found	High	High	Not Found	High	High	Not Found	High	High	High	3	0.6362	0	1	1	1	537.594	0.36	0.00019	19.7968	0.0008107	3.544e-05	1.569	4.26
High	Unambiguous	MVMVLTVQDVVCTR	1xCarbamidomethyl [C12]; 2xOxidation [M1; M3]	1xCarbamidomethyl [C12]; 2xOxidation [M1; M3]	0.000493479	0.00133933	1.416	1	3	1	Cluster-58773.194608;orf1 len=190 frame:3 start:591 end:1160 gi	220683564 gb|ACL80558.1| sodium-calcium exchanger [Doryteuthis pealeii]	Cluster-58773.194608;orf1 len=190 frame:3 start:591 end:1160 gi; A0A6P7TN79; Cluster-58773.194607;orf1 len=188 frame:-2 start:668 end:105 gi	0	1682.83	14	Not Found	Not Found	High	Not Found	Not Found	High	Not Found	Not Found	High	High	2	0.6969	0	1	1	1	841.918	0.36	0.00031	55.8715	0.0008107	8.299e-05	1.416	3.53
High	Unambiguous	MVVPPITMSTTFK	2xOxidation [M1; M8]	2xOxidation [M1; M8]	0.000412629	0.00133933	1.455	1	4	1	A0A6P7TGG8	Gamma-cystathionase OS=Octopus vulgaris OX=6645 GN=LOC115223921 PE=3 SV=1	A0A0L8I4B3; Cluster-58773.162504;orf1 len=255 frame:-3 start:766 end:2 gi; Cluster-58773.162513;orf1 len=445 frame:3 start:1236 end:2570 gi; A0A6P7TGG8	0	1483.75	13	Not Found	Not Found	High	Not Found	Not Found	High	Not Found	Not Found	High	High	2	0.5345	0	1	1	1	742.381	1.01	0.00075	46.9813	0.0008107	6.683e-05	1.455	2.32
High	Unambiguous	NAATEDLWDALESASGKPIK			8.01235e-06	0.00133933	2.314	1	4	2	Cluster-58773.88130;orf1 len=870 frame:3 start:327 end:2936 gi	762145751 ref|XP_011456155.1| PREDICTED: puromycin-sensitive aminopeptidase-like [Crassostrea gigas]	A0A6P7TEW0; Cluster-58773.88131;orf1 len=838 frame:1 start:325 end:2838 gi; Cluster-58773.88135;orf1 len=833 frame:1 start:325 end:2823 gi; Cluster-58773.88130;orf1 len=870 frame:3 start:327 end:2936 gi	0	2116.06	20	Not Found	High	High	Not Found	High	High	Not Found	High	High	High	3	0.6456	0	1	1	1	706.024	0.15	0.0001	65.9217	0.0008107	5.721e-07	2.314	3.64
High	Unambiguous	NAATEDLWDALESASGKPIKR			3.88054e-06	0.00133933	2.472	1	4	4	Cluster-58773.88130;orf1 len=870 frame:3 start:327 end:2936 gi	762145751 ref|XP_011456155.1| PREDICTED: puromycin-sensitive aminopeptidase-like [Crassostrea gigas]	A0A6P7TEW0; Cluster-58773.88131;orf1 len=838 frame:1 start:325 end:2838 gi; Cluster-58773.88135;orf1 len=833 frame:1 start:325 end:2823 gi; Cluster-58773.88130;orf1 len=870 frame:3 start:327 end:2936 gi	1	2272.16	21	Not Found	High	High	Not Found	High	High	Not Found	High	High	High	4	0.7182	0	1	1	1	568.796	1.79	0.00102	59.8616	0.0008107	2.391e-07	2.472	5.43
High	Unambiguous	NAENELHETTSR			0.000144289	0.00133933	1.684	2	7	2	A0A6P7T042; Cluster-58773.164376;orf1 len=615 frame:1 start:1 end:1845 gi	LOW QUALITY PROTEIN: paramyosin-like OS=Octopus vulgaris OX=6645 GN=LOC115218392 PE=4 SV=1 762093591 ref|XP_011429255.1| PREDICTED: paramyosin-like isoform X1 [Crassostrea gigas]	A0A6P7T042; A0A1Y1DC43; Cluster-58773.164376;orf1 len=615 frame:1 start:1 end:1845 gi; A0A1Y1DCD9; A0A2Z5U2S9; A0A812CK18; A0A2Z5U2T7	0	1400.64	12	Not Found	High	Not Found	Not Found	High	Not Found	Not Found	High	Not Found	High	3	0.4806	0	1	1	1	467.551	-0.52	-0.00024	19.7241	0.0008107	1.873e-05	1.684	3.6
High	Unambiguous	NAFKDMTTDGRYEEIAAFHGLPAQCPNK	1xCarbamidomethyl [C25]; 1xOxidation [M6]	1xCarbamidomethyl [C25]; 1xOxidation [M6]	0.000229351	0.00133933	1.583	1	1	3	A0A6P7SER3	hemocyanin 1-like OS=Octopus vulgaris OX=6645 GN=LOC115212215 PE=4 SV=2	A0A6P7SER3	2	3197.48	28	Not Found	Not Found	High	Not Found	Not Found	High	Not Found	Not Found	High	High	4	0.0876	0	1	1	1	800.126	1.06	0.00085	46.2585	0.0008107	3.283e-05	1.583	5.25
High	Unambiguous	NAHIFTIATLTGHAVLAMGPDYTAVMDNGPAK	2xOxidation [M18; M26]	2xOxidation [M18; M26]	1.9497e-06	0.00133933	2.622	1	3	1	A0A6P7U7W9	putative aminopeptidase W07G4.4 isoform X1 OS=Octopus vulgaris OX=6645 GN=LOC115232621 PE=3 SV=1	Cluster-58773.206032;orf1 len=531 frame:1 start:643 end:2235 gi; A0A7E6FRC1; A0A6P7U7W9	0	3329.63	32	Not Found	Not Found	High	Not Found	Not Found	High	Not Found	Not Found	High	High	4	0.5461	0	1	1	1	833.166	3.39	0.00282	59.3249	0.0008107	1.042e-07	2.622	5.42
High	Unambiguous	NAIVWVGETASPSEK			0.00016332	0.00133933	1.657	1	4	1	A0A6P7SDN6	gelsolin-like protein 2 OS=Octopus vulgaris OX=6645 GN=LOC115211664 PE=4 SV=1	Cluster-58773.161114;orf1 len=104 frame:-1 start:507 end:196 gi; Cluster-58773.163016;orf1 len=81 frame:3 start:999 end:1241 gi; A0A6P7SDN6; Cluster-58773.161026;orf1 len=364 frame:1 start:532 end:1623 gi	0	1587.8	15	Not Found	High	Not Found	Not Found	High	Not Found	Not Found	High	Not Found	High	2	0.6611	0	1	1	1	794.405	1.14	0.0009	49.4551	0.0008107	2.176e-05	1.657	3.57
High	Unambiguous	NDGRYEEIAAFHGLPAQCPNK	1xCarbamidomethyl [C18]	1xCarbamidomethyl [C18]	0.00211194	0.00133933	1.099	3	4	1	A0A6P7SER3; A0A6P7SDC4; Cluster-58773.162319;orf1 len=2921 frame:3 start:24 end:8786 gi	hemocyanin 1-like OS=Octopus vulgaris OX=6645 GN=LOC115212215 PE=4 SV=2 hemocyanin G-type, units Oda to Odg OS=Octopus vulgaris OX=6645 GN=LOC115211670 PE=4 SV=2 16596797 gb|AAK28276.2| hemocyanin G-type [Enteroctopus dofleini]	A0A6P7SER3; Cluster-58773.162316;orf1 len=2526 frame:3 start:24 end:7601 gi; A0A6P7SDC4; Cluster-58773.162319;orf1 len=2921 frame:3 start:24 end:8786 gi	1	2387.12	21	Not Found	Not Found	High	Not Found	Not Found	High	Not Found	Not Found	High	High	4	0.508	0	1	1	1	597.536	0.33	0.0002	44.5967	0.0008107	0.0004779	1.099	4.98
High	Unambiguous	INDYGNIEFENIEEDDKQPLIK			0.000265624	0.00133933	1.551	1	3	1	A0A6P7SVJ8	Arginase OS=Octopus vulgaris OX=6645 GN=LOC115216860 PE=3 SV=1	Cluster-58773.185283;orf1 len=384 frame:2 start:251 end:1402 gi; A0A6P7SVJ8; Cluster-58773.185282;orf1 len=220 frame:-2 start:662 end:3 gi	1	2636.27	22	Not Found	High	Not Found	Not Found	High	Not Found	Not Found	High	Not Found	High	3	0.5646	0	1	1	1	879.431	2.41	0.00212	57.6017	0.0008107	3.928e-05	1.551	3.56
High	Unambiguous	LNDEATAEVAR			0.000964148	0.00133933	1.27	1	3	2	A0A0L8HJ80	Major vault protein OS=Octopus bimaculoides OX=37653 GN=OCBIM_22013292mg PE=4 SV=1	A0A0L8HJ80; Cluster-58773.174087;orf1 len=911 frame:1 start:946 end:3678 gi; A0A6P7TRI5	0	1188.59	11	Not Found	High	High	Not Found	High	High	Not Found	High	High	High	2	0.4802	0	1	1	1	594.796	-0.27	-0.00016	27.3357	0.0008107	0.0001855	1.27	3.29
High	Unambiguous	LNAAELTVSK			0.00121266	0.00133933	1.22	1	5	2	Cluster-58773.88130;orf1 len=870 frame:3 start:327 end:2936 gi	762145751 ref|XP_011456155.1| PREDICTED: puromycin-sensitive aminopeptidase-like [Crassostrea gigas]	A0A6P7TEW0; Cluster-58773.88131;orf1 len=838 frame:1 start:325 end:2838 gi; Cluster-58773.88135;orf1 len=833 frame:1 start:325 end:2823 gi; Cluster-58773.88130;orf1 len=870 frame:3 start:327 end:2936 gi; A0A0L8GAS1	0	1045.59	10	Not Found	High	High	Not Found	High	High	Not Found	High	High	High	2	0.3822	0	1	1	1	523.299	1.97	0.00103	37.2975	0.0008107	0.0002454	1.22	3.48
High	Unambiguous	LIWSPTGPINR			0.000169426	0.00133933	1.649	1	5	2	A0A6P7U7W9	putative aminopeptidase W07G4.4 isoform X1 OS=Octopus vulgaris OX=6645 GN=LOC115232621 PE=3 SV=1	A0A812CXA8; Cluster-58773.206032;orf1 len=531 frame:1 start:643 end:2235 gi; A0A7E6FRC1; A0A0L8ICB5; A0A6P7U7W9	0	1253.7	11	Not Found	High	High	Not Found	High	High	Not Found	High	High	High	2	0.4343	0	1	1	1	627.353	-0.63	-0.00039	54.2977	0.0008107	2.278e-05	1.649	2.74
High	Unambiguous	KSDVVATDTGYVDVK			7.83779e-05	0.00133933	1.817	1	6	2	A0A6P7SQQ6	cathepsin L1 OS=Octopus vulgaris OX=6645 GN=LOC115215566 PE=3 SV=1	A0A0L8HPF9; Cluster-58773.131980;orf1 len=55 frame:3 start:303 end:467 gi; Cluster-58773.132048;orf1 len=131 frame:3 start:3 end:395 gi; Cluster-58773.132045;orf1 len=131 frame:-3 start:393 end:1 gi; A0A0L8HQQ4; A0A6P7SQQ6	1	1596.81	15	Not Found	High	Not Found	Not Found	High	Not Found	Not Found	High	Not Found	High	2	0.7227	0	1	1	1	798.909	0.06	5e-05	34.5558	0.0008107	8.967e-06	1.817	4.76
High	Unambiguous	KSVETLTEDEVLNLQVALR			5.05441e-08	0.00133933	3.418	3	4	6	A0A6P7SER3; A0A6P7SDC4; Cluster-58773.162319;orf1 len=2921 frame:3 start:24 end:8786 gi	hemocyanin 1-like OS=Octopus vulgaris OX=6645 GN=LOC115212215 PE=4 SV=2 hemocyanin G-type, units Oda to Odg OS=Octopus vulgaris OX=6645 GN=LOC115211670 PE=4 SV=2 16596797 gb|AAK28276.2| hemocyanin G-type [Enteroctopus dofleini]	A0A6P7SER3; Cluster-58773.162316;orf1 len=2526 frame:3 start:24 end:7601 gi; A0A6P7SDC4; Cluster-58773.162319;orf1 len=2921 frame:3 start:24 end:8786 gi	1	2157.18	19	Not Found	High	High	Not Found	High	High	Not Found	High	High	High	2	0.7303	0	1	1	1	1079.09	-0.39	-0.00042	64.2192	0.0008107	1.268e-09	3.418	5.34
High	Unambiguous	KTLEDLQAEEDKVNHLSK			0.00186608	0.00133933	1.126	1	15	2	A0A6P7TRC4	myosin heavy chain, striated muscle OS=Octopus vulgaris OX=6645 GN=LOC115225111 PE=3 SV=2	V6A729; A0A812AWM7; Cluster-58773.160860;orf1 len=1941 frame:2 start:4361 end:10183 sp; F1ADJ4; G4V4Y6; A0A0L8H7J6; G4V4Y8; A0A812AVW2; B2ZTQ6; V6A720; A0A6P7TRC4; O44934; B2ZTQ5; G4V4Y7; A0A812AXE2	2	2097.08	18	Not Found	High	Not Found	Not Found	High	Not Found	Not Found	High	Not Found	High	3	0.4397	0	1	1	1	699.699	-0.32	-0.00023	36.9221	0.0008107	0.0004117	1.126	3.07
High	Unambiguous	KVAQAVTTSLFYDSSESTVK			7.85933e-07	0.00133933	2.82	2	4	1	A0A6P7SI10; Cluster-58773.163468;orf1 len=382 frame:1 start:88 end:1233 gi	CD109 antigen isoform X2 OS=Octopus vulgaris OX=6645 GN=LOC115213260 PE=4 SV=1 410935705 gb|AFV94409.1| thioester-containing protein 1 [Euprymna scolopes]	A0A6P7SI10; A0A7E6F3R1; Cluster-58773.163469;orf1 len=381 frame:1 start:1 end:1143 gi; Cluster-58773.163468;orf1 len=382 frame:1 start:88 end:1233 gi	1	2161.1	20	Not Found	Not Found	High	Not Found	Not Found	High	Not Found	Not Found	High	High	2	0.7349	0	1	1	1	1081.06	0.22	0.00024	47.2222	0.0008107	3.474e-08	2.82	4.98
High	Unambiguous	KVGDPFDSETENGPQVDADQLSK			2.12928e-05	0.00133933	2.101	1	2	1	A0A6P7SYF3	retinal dehydrogenase 1 OS=Octopus vulgaris OX=6645 GN=LOC115217862 PE=3 SV=1	A0A6P7SYF3; Cluster-58773.188651;orf1 len=503 frame:2 start:653 end:2161 gi	1	2476.15	23	Not Found	High	Not Found	Not Found	High	Not Found	Not Found	High	Not Found	High	3	0.6577	0	1	1	1	826.054	0.05	4e-05	47.4228	0.0008107	1.859e-06	2.101	5.96
High	Unambiguous	KVIDDTIVVSTR			0.000435984	0.00133933	1.443	1	4	1	A0A7E6EZ79	L-threonine ammonia-lyase-like OS=Octopus vulgaris OX=6645 GN=LOC115214389 PE=4 SV=1	A0A7E6EZ79; A0A0L8FMN3; Cluster-58773.230407;orf1 len=181 frame:2 start:311 end:853 gi; Cluster-58773.230405;orf1 len=327 frame:3 start:3 end:983 gi	1	1345.77	12	Not Found	High	Not Found	Not Found	High	Not Found	Not Found	High	Not Found	High	2	0.5592	0	1	1	1	673.388	0.3	0.0002	36.9648	0.0008107	7.121e-05	1.443	3.04
High	Unambiguous	KYDLDFKNPNSDSSK			0.000535961	0.00133933	1.398	1	3	1	A0A6P7TPW3	2-phospho-D-glycerate hydro-lyase OS=Octopus vulgaris OX=6645 GN=LOC115224300 PE=3 SV=1	A0A6P7TPW3; Cluster-58773.161192;orf1 len=376 frame:2 start:422 end:1549 gi; Cluster-58773.161191;orf1 len=454 frame:1 start:424 end:1785 gi	2	1757.83	15	Not Found	High	Not Found	Not Found	High	Not Found	Not Found	High	Not Found	High	3	0.5674	0	1	1	1	586.616	0.07	4e-05	31.6507	0.0008107	9.134e-05	1.398	4.23
High	Unambiguous	KYSSLENELDNITR			0.000188284	0.00133933	1.626	1	2	2	A0A6P7SD30	tropomyosin Tod p 1.0102 OS=Octopus vulgaris OX=6645 GN=LOC115211774 PE=3 SV=1	A0A6P7SD30; Cluster-58773.150618;orf1 len=261 frame:-3 start:981 end:199 gi	1	1681.84	14	Not Found	High	Not Found	Not Found	High	Not Found	Not Found	High	Not Found	High	2	0.6246	0	1	1	1	841.424	0.81	0.00068	48.585	0.0008107	2.584e-05	1.626	2.93
High	Unambiguous	IAAEGAIIR			0.000809922	0.00133933	1.308	1	1	4	A0A6P7SER3	hemocyanin 1-like OS=Octopus vulgaris OX=6645 GN=LOC115212215 PE=4 SV=2	A0A6P7SER3	0	913.547	9	High	High	High	High	High	High	High	High	High	High	2	0.2296	0	1	1	1	457.276	-0.99	-0.00045	35.3915	0.0008107	0.0001505	1.308	2.57
High	Unambiguous	IAAEGAIIRK			0.00139152	0.00133933	1.19	1	1	1	A0A6P7SER3	hemocyanin 1-like OS=Octopus vulgaris OX=6645 GN=LOC115212215 PE=4 SV=2	A0A6P7SER3	1	1041.64	10	Not Found	Not Found	High	Not Found	Not Found	High	Not Found	Not Found	High	High	2	0.4132	0	1	1	1	521.324	0.18	9e-05	25.6357	0.0008107	0.000289	1.19	3.17
High	Unambiguous	IAAQANVPLQDFVIR			5.47967e-05	0.00133933	1.895	1	3	1	A0A6P7T7W6	Aspartyl aminopeptidase OS=Octopus vulgaris OX=6645 GN=LOC115220844 PE=3 SV=1	A0A6P7T7W6; Cluster-58773.204280;orf1 len=497 frame:3 start:759 end:2249 sp; A0A0L8IA05	0	1654.93	15	Not Found	Not Found	High	Not Found	Not Found	High	Not Found	Not Found	High	High	2	0.6486	0	1	1	1	827.968	0.4	0.00033	62.7541	0.0008107	5.846e-06	1.895	3.87
High	Unambiguous	KPMSPFSLTSDINVDSMTR	2xOxidation [M3; M17]	2xOxidation [M3; M17]	2.21906e-05	0.00133933	2.092	3	5	8	A0A6P7SER3; A0A6P7SDC4; Cluster-58773.162319;orf1 len=2921 frame:3 start:24 end:8786 gi	hemocyanin 1-like OS=Octopus vulgaris OX=6645 GN=LOC115212215 PE=4 SV=2 hemocyanin G-type, units Oda to Odg OS=Octopus vulgaris OX=6645 GN=LOC115211670 PE=4 SV=2 16596797 gb|AAK28276.2| hemocyanin G-type [Enteroctopus dofleini]	A0A0L8GNM6; A0A6P7SER3; Cluster-58773.162316;orf1 len=2526 frame:3 start:24 end:7601 gi; A0A6P7SDC4; Cluster-58773.162319;orf1 len=2921 frame:3 start:24 end:8786 gi	0	2158.02	19	High	High	High	High	High	High	High	High	High	High	3	0.5316	0	1	1	1	720.011	1.17	0.00084	50.0402	0.0008107	1.964e-06	2.092	4.59
High	Unambiguous	LAETETDGNGFR			0.000278096	0.00133933	1.541	1	3	2	A0A6P7T402	uncharacterized HIT-like protein Synpcc7942_1390 OS=Octopus vulgaris OX=6645 GN=LOC115219148 PE=4 SV=1	A0A6P7T402; A0A0L8FRE8; Cluster-58773.76616;orf1 len=148 frame:3 start:120 end:563 gi	0	1309.6	12	Not Found	High	High	Not Found	High	High	Not Found	High	High	High	2	0.6332	0	1	1	1	655.304	-1.02	-0.00067	30.7309	0.0008107	4.136e-05	1.541	3.49
High	Unambiguous	LAKPLKPFNLDSNHNAVTK			3.02886e-06	0.00133933	2.526	1	1	7	A0A6P7SDC4	hemocyanin G-type, units Oda to Odg OS=Octopus vulgaris OX=6645 GN=LOC115211670 PE=4 SV=2	A0A6P7SDC4	0	2107.17	19	Not Found	High	High	Not Found	High	High	Not Found	High	High	High	5	0.6398	0	1	1	1	422.239	0.71	0.0003	32.4354	0.0008107	1.769e-07	2.526	4.83
High	Unambiguous	IANALSTGHPDWTDEVVFQEAR			6.09499e-09	0.00133933	3.879	1	5	13	Cluster-58773.132244;orf1 len=954 frame:2 start:176 end:3037 gi	159006 gb|AAA16244.1| peroxidase-like protein, partial [Euprymna scolopes]	Cluster-58773.132244;orf1 len=954 frame:2 start:176 end:3037 gi; A0A7E6FIS1; Cluster-58773.132246;orf1 len=948 frame:2 start:176 end:3019 gi; Cluster-58773.132245;orf1 len=864 frame:2 start:176 end:2767 gi; Cluster-58773.132247;orf1 len=433 frame:-1 start:1324 end:26 gi	0	2456.18	22	High	High	High	High	High	High	High	High	High	High	2	0.6557	0	1	1	1	1228.6	1.23	0.00151	58.4826	0.0008107	9.844e-11	3.879	5.78
High	Unambiguous	LASSPCNGDSGGSLACR	2xCarbamidomethyl [C6; C16]	2xCarbamidomethyl [C6; C16]	1.08464e-05	0.00133933	2.248	1	3	3	A0A6P7TWP3	chymotrypsin-like protease CTRL-1 OS=Octopus vulgaris OX=6645 GN=LOC115226866 PE=4 SV=2	A0A6P7TWP3; Cluster-58773.40156;orf1 len=301 frame:3 start:3 end:905 gi; Cluster-58773.40152;orf1 len=268 frame:-2 start:1285 end:482 gi	0	1708.74	17	High	Not Found	High	High	Not Found	High	High	Not Found	High	High	2	0.7464	0	1	1	1	854.875	2.49	0.00213	28.4522	0.0008107	8.265e-07	2.248	4.81
High	Unambiguous	IASVSVQKPGTQTSFPSR			3.23281e-05	0.00133933	2.01	1	7	1	A0A7E6F650	Ribokinase OS=Octopus vulgaris OX=6645 GN=LOC115217290 PE=3 SV=1	Cluster-58773.101400;orf1 len=311 frame:3 start:240 end:1172 gi; A0A7E6F650; A0A7E6F606; A0A6P7SWY6; Cluster-58773.101401;orf1 len=307 frame:2 start:137 end:1057 gi; Cluster-58773.101399;orf1 len=298 frame:-1 start:960 end:67 gi; A0A7E6F8C5	0	1890.01	18	Not Found	Not Found	High	Not Found	Not Found	High	Not Found	Not Found	High	High	3	0.5684	0	1	1	1	630.673	-2.47	-0.00155	35.7914	0.0008107	3.081e-06	2.01	3.73
High	Unambiguous	LAVSHSQIFVAMR			7.87384e-05	0.00133933	1.816	1	2	2	A0A6P7TQ10	uncharacterized protein LOC115225177 OS=Octopus vulgaris OX=6645 GN=LOC115225177 PE=4 SV=1	Cluster-58773.57631;orf1 len=635 frame:1 start:112 end:2016 gi; A0A6P7TQ10	0	1458.79	13	Not Found	Not Found	High	Not Found	Not Found	High	Not Found	Not Found	High	High	2	0.6837	0	1	1	1	729.9	2.72	0.00199	45.1705	0.0008107	9.044e-06	1.816	3.13
High	Unambiguous	LAVSHSQIFVAMR	1xOxidation [M12]	1xOxidation [M12]	0.000982001	0.00133933	1.266	1	2	5	A0A6P7TQ10	uncharacterized protein LOC115225177 OS=Octopus vulgaris OX=6645 GN=LOC115225177 PE=4 SV=1	Cluster-58773.57631;orf1 len=635 frame:1 start:112 end:2016 gi; A0A6P7TQ10	0	1474.78	13	High	Not Found	High	High	Not Found	High	High	Not Found	High	High	2	0.4862	0	1	1	1	737.898	3.19	0.00235	37.8194	0.0008107	0.0001903	1.266	2.53
High	Unambiguous	LDAHDDFDIK			0.000887741	0.00133933	1.288	3	6	4	A0A6P7SER3; Q9BJ58; O61363	hemocyanin 1-like OS=Octopus vulgaris OX=6645 GN=LOC115212215 PE=4 SV=2 Hemocyanin G-type (Fragment) OS=Enteroctopus dofleini OX=267067 PE=4 SV=2 Hemocyanin G-type, units Oda to Odg OS=Enteroctopus dofleini OX=267067 GN=ODHCY PE=1 SV=1	A0A0L8GNM6; A0A6P7SER3; Q9BJ58; O61363; P12659; A0A0P0UX03	0	1188.55	10	Not Found	High	High	Not Found	High	High	Not Found	High	High	High	2	0.5485	0	1	1	1	594.782	3.4	0.00202	37.5872	0.0008107	0.0001682	1.288	2.99
High	Unambiguous	IDGKPLTENDR			0.000916708	0.00133933	1.281	1	4	5	A0A6P7SI10	CD109 antigen isoform X2 OS=Octopus vulgaris OX=6645 GN=LOC115213260 PE=4 SV=1	A0A6P7SI10; A0A7E6F3R1; Cluster-58773.163438;orf1 len=994 frame:2 start:254 end:3235 gi; Cluster-58773.160937;orf1 len=552 frame:-3 start:1658 end:3 gi	0	1257.64	11	High	High	High	High	High	High	High	High	High	High	2	0.5523	0	1	1	1	629.326	1.27	0.0008	20.6836	0.0008107	0.0001753	1.281	2.39
High	Unambiguous	LDGLDGQVGR			0.00117435	0.00133933	1.227	1	4	1	A0A6P7T042	LOW QUALITY PROTEIN: paramyosin-like OS=Octopus vulgaris OX=6645 GN=LOC115218392 PE=4 SV=1	A0A6P7T042; Cluster-58773.151058;orf1 len=176 frame:-3 start:541 end:14 gi; Cluster-58773.164372;orf1 len=235 frame:-3 start:705 end:1 gi; Cluster-58773.162330;orf1 len=177 frame:-1 start:531 end:1 gi	0	1029.53	10	Not Found	High	Not Found	Not Found	High	Not Found	Not Found	High	Not Found	High	2	0.5288	0	1	1	1	515.27	-0.37	-0.00019	35.7917	0.0008107	0.0002361	1.227	2.95
High	Unambiguous	LDKDDDGSVSKLEFVEAVQAQEHPQNAK			0.000151064	0.00133933	1.674	1	1	3	Cluster-58773.47482;orf1 len=193 frame:2 start:59 end:637 gi	443711424 gb|ELU05212.1| hypothetical protein CAPTEDRAFT_211623 [Capitella teleta]	Cluster-58773.47482;orf1 len=193 frame:2 start:59 end:637 gi	2	3097.51	28	Not Found	High	High	Not Found	High	High	Not Found	High	High	High	4	0.545	0	1	1	1	775.134	2.04	0.00158	46.5681	0.0008107	1.983e-05	1.674	5.45
High	Unambiguous	IDKVTHPVPDFGDVNNLNIGDLDPSGNLIVSTR			5.22424e-07	0.00133933	2.909	1	5	1	Cluster-58773.161841;orf1 len=169 frame:-2 start:507 end:1 gi	340742817 gb|AEK65120.1| arginine kinase [Amphioctopus fangsiao]	A0A6P7S5D2; Cluster-58773.161832;orf1 len=176 frame:-2 start:528 end:1 gi; Cluster-58773.156920;orf1 len=169 frame:-2 start:507 end:1 gi; Cluster-58773.161852;orf1 len=353 frame:1 start:304 end:1362 gi; Cluster-58773.161841;orf1 len=169 frame:-2 start:507 end:1 gi	1	3531.81	33	Not Found	High	Not Found	Not Found	High	Not Found	Not Found	High	Not Found	High	4	0.5697	0	1	1	1	883.708	0.59	0.00052	66.8088	0.0008107	2.117e-08	2.909	6.74
High	Unambiguous	IAHHDIANDVETK			0.0020831	0.00133933	1.102	1	8	1	A0A7E6F497	ATP-citrate synthase OS=Octopus vulgaris OX=6645 GN=LOC115216353 PE=3 SV=1	Cluster-58773.169370;orf1 len=1115 frame:2 start:119 end:3463 gi; Cluster-58773.169386;orf1 len=1110 frame:3 start:162 end:3491 gi; Cluster-58773.129421;orf1 len=90 frame:-2 start:272 end:3 gi; A0A7E6F497; A0A6P7ST78; A0A7E6F3J4; A0A7E6F5Z0; Cluster-58773.169384;orf1 len=1106 frame:2 start:119 end:3436 gi	0	1462.73	13	Not Found	High	Not Found	Not Found	High	Not Found	Not Found	High	Not Found	High	3	0.49	0	1	1	1	488.247	-0.7	-0.00034	19.9053	0.0008107	0.000472	1.102	3.51
High	Unambiguous	KPMSPFSLTSDINVDSMTR	1xOxidation [M3]	1xOxidation [M3]	5.94601e-06	0.00133933	2.379	3	5	2	A0A6P7SER3; A0A6P7SDC4; Cluster-58773.162319;orf1 len=2921 frame:3 start:24 end:8786 gi	hemocyanin 1-like OS=Octopus vulgaris OX=6645 GN=LOC115212215 PE=4 SV=2 hemocyanin G-type, units Oda to Odg OS=Octopus vulgaris OX=6645 GN=LOC115211670 PE=4 SV=2 16596797 gb|AAK28276.2| hemocyanin G-type [Enteroctopus dofleini]	A0A0L8GNM6; A0A6P7SER3; Cluster-58773.162316;orf1 len=2526 frame:3 start:24 end:7601 gi; A0A6P7SDC4; Cluster-58773.162319;orf1 len=2921 frame:3 start:24 end:8786 gi	0	2142.02	19	Not Found	High	High	Not Found	High	High	Not Found	High	High	High	3	0.6752	0	1	1	1	714.678	-0.13	-9e-05	56.1716	0.0008107	3.993e-07	2.379	4.31
High	Unambiguous	KPLSIEEVEVAPPK			6.17402e-05	0.00133933	1.869	1	7	3	A0A6P7SJV4	S-(hydroxymethyl)glutathione dehydrogenase OS=Octopus vulgaris OX=6645 GN=LOC115213890 PE=3 SV=1	A0A6P7SJV4; P81431; Cluster-58773.171973;orf1 len=396 frame:1 start:370 end:1557 gi; A0A0L8FZA9; Cluster-58773.171970;orf1 len=73 frame:-3 start:220 end:2 gi; Cluster-58773.171971;orf2 len=263 frame:3 start:357 end:1145 gi; A0A0L8FZK6	0	1535.87	14	Not Found	High	High	Not Found	High	High	Not Found	High	High	High	3	0.6389	0	1	1	1	512.629	2.52	0.00129	43.6045	0.0008107	6.736e-06	1.869	3.6
High	Unambiguous	KPLLVPVVK			0.000412629	0.00133933	1.455	1	5	1	A0A6P7U7W9	putative aminopeptidase W07G4.4 isoform X1 OS=Octopus vulgaris OX=6645 GN=LOC115232621 PE=3 SV=1	Cluster-58773.206032;orf1 len=531 frame:1 start:643 end:2235 gi; Cluster-58773.206031;orf1 len=235 frame:-1 start:705 end:1 gi; A0A7E6FRC1; A0A0L8ICB5; A0A6P7U7W9	0	992.687	9	Not Found	Not Found	High	Not Found	Not Found	High	Not Found	Not Found	High	High	2	0.6707	0	1	1	1	496.847	0.12	6e-05	36.8109	0.0008107	6.686e-05	1.455	3.31
High	Unambiguous	KAESEGGASRPPPPDAQPNE			0.00110131	0.00133933	1.241	1	2	1	A0A6P7T033	T-complex protein 1 subunit gamma OS=Octopus vulgaris OX=6645 GN=LOC115218091 PE=3 SV=1	Cluster-58773.175176;orf1 len=560 frame:2 start:11 end:1690 gi; A0A6P7T033	1	2033.95	20	Not Found	High	Not Found	Not Found	High	Not Found	Not Found	High	Not Found	High	3	0.5223	0	1	1	1	678.656	0.18	0.00012	20.2138	0.0008107	0.0002183	1.241	3.58
High	Unambiguous	KALQAYEDDKSPNGYQQVAAFHGSTQWCPSPDAAVK	1xCarbamidomethyl [C28]	1xCarbamidomethyl [C28]	3.12482e-07	0.00133933	3.021	3	4	2	A0A6P7SER3; A0A6P7SDC4; Cluster-58773.162319;orf1 len=2921 frame:3 start:24 end:8786 gi	hemocyanin 1-like OS=Octopus vulgaris OX=6645 GN=LOC115212215 PE=4 SV=2 hemocyanin G-type, units Oda to Odg OS=Octopus vulgaris OX=6645 GN=LOC115211670 PE=4 SV=2 16596797 gb|AAK28276.2| hemocyanin G-type [Enteroctopus dofleini]	A0A6P7SER3; Cluster-58773.162316;orf1 len=2526 frame:3 start:24 end:7601 gi; A0A6P7SDC4; Cluster-58773.162319;orf1 len=2921 frame:3 start:24 end:8786 gi	2	3964.86	36	Not Found	Not Found	High	Not Found	Not Found	High	Not Found	Not Found	High	High	4	0.6643	0	1	1	1	991.97	0.59	0.00058	46.7373	0.0008107	1.141e-08	3.021	5.57
High	Unambiguous	KDIDVDIPLNHIR			2.52096e-06	0.00133933	2.566	3	4	4	A0A6P7SER3; A0A6P7SDC4; Cluster-58773.162319;orf1 len=2921 frame:3 start:24 end:8786 gi	hemocyanin 1-like OS=Octopus vulgaris OX=6645 GN=LOC115212215 PE=4 SV=2 hemocyanin G-type, units Oda to Odg OS=Octopus vulgaris OX=6645 GN=LOC115211670 PE=4 SV=2 16596797 gb|AAK28276.2| hemocyanin G-type [Enteroctopus dofleini]	A0A6P7SER3; Cluster-58773.162316;orf1 len=2526 frame:3 start:24 end:7601 gi; A0A6P7SDC4; Cluster-58773.162319;orf1 len=2921 frame:3 start:24 end:8786 gi	1	1547.85	13	Not Found	High	High	Not Found	High	High	Not Found	High	High	High	2	0.6	0	1	1	1	774.431	0.32	0.00025	44.5481	0.0008107	1.416e-07	2.566	4.35
High	Unambiguous	KDVEDLESSLAK			1.20537e-05	0.00133933	2.225	1	5	1	A0A6P7TRC4	myosin heavy chain, striated muscle OS=Octopus vulgaris OX=6645 GN=LOC115225111 PE=3 SV=2	V6A729; Cluster-58773.160860;orf1 len=1941 frame:2 start:4361 end:10183 sp; A0A0L8H7J6; Cluster-58773.165092;orf1 len=1029 frame:-1 start:3088 end:2 gi; A0A6P7TRC4	1	1333.68	12	Not Found	High	Not Found	Not Found	High	Not Found	Not Found	High	Not Found	High	2	0.6726	0	1	1	1	667.346	0.06	4e-05	38.1763	0.0008107	9.384e-07	2.225	5.62
High	Unambiguous	KESAQTEPAWEGAGSK			0.00111146	0.00133933	1.239	1	5	1	A0A6P7SDN6	gelsolin-like protein 2 OS=Octopus vulgaris OX=6645 GN=LOC115211664 PE=4 SV=1	Cluster-58773.203701;orf1 len=89 frame:-2 start:269 end:3 gi; Cluster-58773.161025;orf1 len=319 frame:3 start:135 end:1091 gi; A0A6P7SDN6; Cluster-58773.161026;orf1 len=364 frame:1 start:532 end:1623 gi; Cluster-58773.149743;orf1 len=134 frame:-2 start:403 end:2 gi	1	1675.79	16	Not Found	High	Not Found	Not Found	High	Not Found	Not Found	High	Not Found	High	3	0.4694	0	1	1	1	559.272	5.18	0.00289	25.1648	0.0008107	0.0002204	1.239	2.45
High	Unambiguous	KESDVVFDELYR			6.45798e-06	0.00133933	2.361	3	5	4	A0A6P7SER3; A0A6P7SDC4; Cluster-58773.162319;orf1 len=2921 frame:3 start:24 end:8786 gi	hemocyanin 1-like OS=Octopus vulgaris OX=6645 GN=LOC115212215 PE=4 SV=2 hemocyanin G-type, units Oda to Odg OS=Octopus vulgaris OX=6645 GN=LOC115211670 PE=4 SV=2 16596797 gb|AAK28276.2| hemocyanin G-type [Enteroctopus dofleini]	A0A6P7SER3; Cluster-58773.162316;orf1 len=2526 frame:3 start:24 end:7601 gi; A0A6P7SDC4; Q5XLV2; Cluster-58773.162319;orf1 len=2921 frame:3 start:24 end:8786 gi	1	1499.74	12	Not Found	High	High	Not Found	High	High	Not Found	High	High	High	2	0.6197	0	1	1	1	750.373	0.3	0.00022	50.0113	0.0008107	4.406e-07	2.361	4.26
High	Unambiguous	KETVITVDASQAGTGK			5.47463e-06	0.00133933	2.397	1	10	2	A0A7E6FE51	filamin-A isoform X1 OS=Octopus vulgaris OX=6645 GN=LOC115220251 PE=3 SV=1	Cluster-58773.156212;orf1 len=2403 frame:1 start:685 end:7893 gi; Cluster-58773.142243;orf1 len=363 frame:-2 start:1089 end:1 gi; A0A0L8H0B6; A0A7E6FE51; A0A0L8H1I7; A0A0L8H0J5; A0A7E6FGP0; A0A0L8H0B8; A0A0L8H0C0; A0A0L8H027	1	1604.85	16	Not Found	High	Not Found	Not Found	High	Not Found	Not Found	High	Not Found	High	2	0.6453	0	1	1	1	802.925	-4.25	-0.00341	29.1537	0.0008107	3.613e-07	2.397	3.75
High	Unambiguous	KFDDLGIWYEHR			0.000770068	0.00133933	1.319	1	3	1	A0A6P7TGA0	Isocitrate dehydrogenase [NADP] OS=Octopus vulgaris OX=6645 GN=LOC115223822 PE=3 SV=1	Cluster-58773.134125;orf1 len=449 frame:2 start:584 end:1930 gi; A0A6P7TGA0; A0A0L8H5J4	1	1578.77	12	Not Found	High	Not Found	Not Found	High	Not Found	Not Found	High	Not Found	High	3	0.5812	0	1	1	1	526.928	-0.86	-0.00045	49.6292	0.0008107	0.0001415	1.319	3.2
High	Unambiguous	KFGIDSEASYPYEGVDAK			0.000125158	0.00133933	1.715	1	2	1	A0A6P7SQT5	cathepsin L1-like OS=Octopus vulgaris OX=6645 GN=LOC115215560 PE=3 SV=1	A0A6P7SQT5; Cluster-58773.132038;orf1 len=181 frame:-1 start:553 end:11 gi	1	1975.93	18	Not Found	High	Not Found	Not Found	High	Not Found	Not Found	High	Not Found	High	3	0.662	0	1	1	1	659.314	0.09	6e-05	46.4527	0.0008107	1.583e-05	1.715	3.58
High	Unambiguous	KFSNLENDFDNAK			3.45996e-06	0.00133933	2.497	3	34	2	A0A7E6EQL5; A0A7E6EQM0; A0A7E6ET70	tropomyosin Tod p 1.0102 isoform X3 OS=Octopus vulgaris OX=6645 GN=LOC115210626 PE=3 SV=1 tropomyosin Tod p 1.0102 isoform X10 OS=Octopus vulgaris OX=6645 GN=LOC115210626 PE=3 SV=1 tropomyosin Tod p 1.0102 isoform X27 OS=Octopus vulgaris OX=6645 GN=LOC115210626 PE=3 SV=1	A0A7E6ESN7; A0A7E6ESP2; A0A7E6ERK8; A0A7E6ERJ4; Cluster-58773.159342;orf2 len=257 frame:3 start:672 end:1442 gi; A0A7E6EQM7; A0A7E6EQL5; A0A7E6ESM7; A0A6P7SAR7; A0A7E6EQN2; A0A7E6EQM4; A0A7E6ERL1; A0A7E6ERK2; A0A7E6ERJ7; A0A7E6ERJ9; A0A7E6ET67; Cluster-58773.159343;orf1 len=290 frame:-2 start:953 end:84 gi; Cluster-58773.159326;orf1 len=288 frame:3 start:672 end:1535 gi; A0A7E6ET75; A0A7E6ESM2; A…	1	1541.72	13	Not Found	High	Not Found	Not Found	High	Not Found	Not Found	High	Not Found	High	2	0.6588	0	1	1	1	771.366	0.45	0.00035	38.2865	0.0008107	2.079e-07	2.497	5.07
High	Unambiguous	KFSNLENDFDNAKEQLAEANQK			4.12287e-05	0.00133933	1.957	3	34	2	A0A7E6EQL5; A0A7E6EQM0; A0A7E6ET70	tropomyosin Tod p 1.0102 isoform X3 OS=Octopus vulgaris OX=6645 GN=LOC115210626 PE=3 SV=1 tropomyosin Tod p 1.0102 isoform X10 OS=Octopus vulgaris OX=6645 GN=LOC115210626 PE=3 SV=1 tropomyosin Tod p 1.0102 isoform X27 OS=Octopus vulgaris OX=6645 GN=LOC115210626 PE=3 SV=1	A0A7E6ESN7; A0A7E6ESP2; A0A7E6ERK8; A0A7E6ERJ4; Cluster-58773.159342;orf2 len=257 frame:3 start:672 end:1442 gi; A0A7E6EQM7; A0A7E6EQL5; A0A7E6ESM7; A0A6P7SAR7; A0A7E6EQN2; A0A7E6EQM4; A0A7E6ERL1; A0A7E6ERK2; A0A7E6ERJ7; A0A7E6ERJ9; A0A7E6ET67; Cluster-58773.159343;orf1 len=290 frame:-2 start:953 end:84 gi; Cluster-58773.159326;orf1 len=288 frame:3 start:672 end:1535 gi; A0A7E6ET75; A0A7E6ESM2; A…	2	2553.22	22	Not Found	High	Not Found	Not Found	High	Not Found	Not Found	High	Not Found	High	4	0.5185	0	1	1	1	639.061	-0.44	-0.00028	49.7935	0.0008107	4.132e-06	1.957	5.13
High	Unambiguous	KGAETFEVDEHPRPTTK			0.000566295	0.00133933	1.386	1	8	1	A0A6P7SVY8	3-ketoacyl-CoA thiolase, mitochondrial isoform X2 OS=Octopus vulgaris OX=6645 GN=LOC115217007 PE=3 SV=1	Cluster-58773.195989;orf1 len=433 frame:1 start:337 end:1635 gi; Cluster-58773.195985;orf1 len=332 frame:1 start:337 end:1332 gi; A0A6P7SVY8; Cluster-58773.195983;orf1 len=413 frame:2 start:2 end:1240 gi; A0A0L8HZ45; A0A6P7SVV0; Cluster-58773.195990;orf1 len=125 frame:-3 start:376 end:2 gi; Cluster-58773.195986;orf1 len=350 frame:1 start:337 end:1386 gi	1	1941.97	17	Not Found	High	Not Found	Not Found	High	Not Found	Not Found	High	Not Found	High	4	0.5522	0	1	1	1	486.245	-5.17	-0.00251	22.8861	0.0008107	9.767e-05	1.386	4.69
High	Unambiguous	KHEAFESDLAAHQDR			0.000202627	0.00133933	1.61	1	6	1	A0A6P7SH66	alpha-actinin, sarcomeric isoform X3 OS=Octopus vulgaris OX=6645 GN=LOC115212896 PE=4 SV=1	A0A6P7SH66; A0A6P7SGJ6; A0A6P7SHV3; A0A812C5K7; A0A0L8GPG8; Cluster-58773.163787;orf1 len=893 frame:3 start:2145 end:4823 gi	1	1753.83	15	Not Found	High	Not Found	Not Found	High	Not Found	Not Found	High	Not Found	High	4	0.5023	0	1	1	1	439.212	1.29	0.00056	21.726	0.0008107	2.826e-05	1.61	4.3
High	Unambiguous	KKDPVDVIPDQETR			0.00211194	0.00133933	1.099	1	3	1	Cluster-58773.159728;orf1 len=257 frame:1 start:901 end:1671 gi	291224559 ref|XP_002732271.1| PREDICTED: methylmalonic aciduria and homocystinuria type C protein homolog [Saccoglossus kowalevskii]	Cluster-58773.159728;orf1 len=257 frame:1 start:901 end:1671 gi; Cluster-58773.157603;orf1 len=153 frame:-1 start:461 end:3 gi; Cluster-58773.160387;orf1 len=122 frame:1 start:85 end:450 gi	2	1639.86	14	Not Found	High	Not Found	Not Found	High	Not Found	Not Found	High	Not Found	High	3	0.4638	0	1	1	1	547.29	-5.01	-0.00274	29.243	0.0008107	0.0004793	1.099	3.73
High	Unambiguous	KLAETETDGNGFR			0.000493479	0.00133933	1.416	1	3	2	A0A6P7T402	uncharacterized HIT-like protein Synpcc7942_1390 OS=Octopus vulgaris OX=6645 GN=LOC115219148 PE=4 SV=1	A0A6P7T402; A0A0L8FRE8; Cluster-58773.76616;orf1 len=148 frame:3 start:120 end:563 gi	1	1437.7	13	Not Found	High	High	Not Found	High	High	Not Found	High	High	High	3	0.6472	0	1	1	1	479.904	-0.14	-6e-05	24.9541	0.0008107	8.296e-05	1.416	3.43
High	Unambiguous	KLAITEVDLER			8.31956e-05	0.00133933	1.804	3	48	2	A0A7E6EQL5; A0A7E6EQM0; A0A7E6ET70	tropomyosin Tod p 1.0102 isoform X3 OS=Octopus vulgaris OX=6645 GN=LOC115210626 PE=3 SV=1 tropomyosin Tod p 1.0102 isoform X10 OS=Octopus vulgaris OX=6645 GN=LOC115210626 PE=3 SV=1 tropomyosin Tod p 1.0102 isoform X27 OS=Octopus vulgaris OX=6645 GN=LOC115210626 PE=3 SV=1	Q2V0V4; Q8IS67; A0A7E6ESP2; A0A7E6ERK8; A0A6P7SAS4; A0A812ETR1; Cluster-58773.159342;orf2 len=257 frame:3 start:672 end:1442 gi; A0A7E6EQM7; Q2V0V3; A0A7E6EQL5; A0A7E6ESM7; A0A6P7SAR7; Q2V0V2; A0A7E6EQN2; A0A7E6EQM4; A0A7E6ERL1; A0A7E6ERJ9; A0A812EVQ1; A0A812EMN7; A0A7E6ET67; Cluster-58773.159340;orf1 len=125 frame:3 start:1944 end:2318 gi; Cluster-58773.159343;orf1 len=290 frame:-2 start:953 end…	1	1286.73	11	Not Found	High	Not Found	Not Found	High	Not Found	Not Found	High	Not Found	High	2	0.4896	0	1	1	1	643.87	0.48	0.00031	43.1617	0.0008107	9.632e-06	1.804	3.86
High	Unambiguous	KIEFTNNPTWIIDPIDGTTNFVHR			2.16872e-05	0.00133933	2.097	1	3	1	A0A6P7S7L1	Inositol-1-monophosphatase OS=Octopus vulgaris OX=6645 GN=LOC115209728 PE=3 SV=1	Cluster-58773.154724;orf1 len=281 frame:2 start:95 end:937 gi; A0A6P7S7L1; Cluster-58773.145437;orf1 len=109 frame:2 start:95 end:421 gi	1	2828.44	24	Not Found	High	Not Found	Not Found	High	Not Found	Not Found	High	Not Found	High	4	0.559	0	1	1	1	707.866	1.56	0.00111	66.0424	0.0008107	1.901e-06	2.097	3.9
High	Unambiguous	KITSDLEGHPTPR			1.63173e-05	0.00133933	2.159	1	5	2	A0A6P7SAW7	transketolase OS=Octopus vulgaris OX=6645 GN=LOC115210747 PE=4 SV=1	A0A0L8HW75; A0A6P7SAW7; Cluster-58773.128728;orf1 len=632 frame:1 start:466 end:2361 gi; Cluster-58773.184718;orf1 len=122 frame:-3 start:368 end:3 gi; A0A812C842	1	1450.76	13	Not Found	High	High	Not Found	High	High	Not Found	High	High	High	3	0.6108	0	1	1	1	484.263	6.33	0.00306	22.1223	0.0008107	1.353e-06	2.159	4.83
High	Unambiguous	KIVISEMQHIAYDEYLPK	1xOxidation [M7]	1xOxidation [M7]	0.000203559	0.00133933	1.609	2	6	30	Cluster-58773.132244;orf1 len=954 frame:2 start:176 end:3037 gi; A0A0L8FXZ4	159006 gb|AAA16244.1| peroxidase-like protein, partial [Euprymna scolopes] Uncharacterized protein OS=Octopus bimaculoides OX=37653 GN=OCBIM_22004572mg PE=4 SV=1	Cluster-58773.132244;orf1 len=954 frame:2 start:176 end:3037 gi; A0A7E6FIS1; Cluster-58773.132246;orf1 len=948 frame:2 start:176 end:3019 gi; A0A0L8FXZ4; Cluster-58773.132245;orf1 len=864 frame:2 start:176 end:2767 gi; Cluster-58773.132247;orf1 len=433 frame:-1 start:1324 end:26 gi	1	2193.13	18	High	High	High	High	High	High	High	High	High	High	4	0.5649	0	1	1	1	549.036	-1.49	-0.00081	47.1512	0.0008107	2.844e-05	1.609	4.62
High	Unambiguous	KNLNSLNTGHIESLR			1.72882e-07	0.00133933	3.15	1	2	6	Cluster-58773.162319;orf1 len=2921 frame:3 start:24 end:8786 gi	16596797 gb|AAK28276.2| hemocyanin G-type [Enteroctopus dofleini]	Cluster-58773.162316;orf1 len=2526 frame:3 start:24 end:7601 gi; Cluster-58773.162319;orf1 len=2921 frame:3 start:24 end:8786 gi	1	1695.91	15	Not Found	High	High	Not Found	High	High	Not Found	High	High	High	2	0.6762	0	1	1	1	848.458	-2.36	-0.002	31.3461	0.0008107	5.599e-09	3.15	5.62
High	Unambiguous	KNVFYSGDIAFEQK			0.00066493	0.00133933	1.351	3	4	4	A0A6P7SER3; A0A6P7SDC4; Cluster-58773.162319;orf1 len=2921 frame:3 start:24 end:8786 gi	hemocyanin 1-like OS=Octopus vulgaris OX=6645 GN=LOC115212215 PE=4 SV=2 hemocyanin G-type, units Oda to Odg OS=Octopus vulgaris OX=6645 GN=LOC115211670 PE=4 SV=2 16596797 gb|AAK28276.2| hemocyanin G-type [Enteroctopus dofleini]	A0A6P7SER3; Cluster-58773.162316;orf1 len=2526 frame:3 start:24 end:7601 gi; A0A6P7SDC4; Cluster-58773.162319;orf1 len=2921 frame:3 start:24 end:8786 gi	1	1645.82	14	Not Found	High	High	Not Found	High	High	Not Found	High	High	High	2	0.6173	0	1	1	1	823.415	0.75	0.00061	46.3844	0.0008107	0.0001187	1.351	4.39
High	Unambiguous	KNVNSLTPSDIK			6.64435e-05	0.00133933	1.853	3	5	4	O61363; A0A6P7SDC4; Cluster-58773.162319;orf1 len=2921 frame:3 start:24 end:8786 gi	Hemocyanin G-type, units Oda to Odg OS=Enteroctopus dofleini OX=267067 GN=ODHCY PE=1 SV=1 hemocyanin G-type, units Oda to Odg OS=Octopus vulgaris OX=6645 GN=LOC115211670 PE=4 SV=2 16596797 gb|AAK28276.2| hemocyanin G-type [Enteroctopus dofleini]	O61363; A0A6P7SDC4; P12659; Q5XLV2; Cluster-58773.162319;orf1 len=2921 frame:3 start:24 end:8786 gi	1	1315.72	12	Not Found	High	High	Not Found	High	High	Not Found	High	High	High	2	0.2524	0	1	1	1	658.368	5.3	0.00349	27.5167	0.0008107	7.364e-06	1.853	4.12
High	Unambiguous	KNVNSLTPSDIKDLR			1.65435e-05	0.00133933	2.156	2	2	1	A0A6P7SDC4; Cluster-58773.162319;orf1 len=2921 frame:3 start:24 end:8786 gi	hemocyanin G-type, units Oda to Odg OS=Octopus vulgaris OX=6645 GN=LOC115211670 PE=4 SV=2 16596797 gb|AAK28276.2| hemocyanin G-type [Enteroctopus dofleini]	A0A6P7SDC4; Cluster-58773.162319;orf1 len=2921 frame:3 start:24 end:8786 gi	2	1699.93	15	Not Found	Not Found	High	Not Found	Not Found	High	Not Found	Not Found	High	High	3	0.4557	0	1	1	1	567.314	-3.69	-0.00209	36.1991	0.0008107	1.373e-06	2.156	3.95
High	Unambiguous	KNVNSLTPTDIK			0.000119545	0.00133933	1.725	1	1	3	A0A6P7SER3	hemocyanin 1-like OS=Octopus vulgaris OX=6645 GN=LOC115212215 PE=4 SV=2	A0A6P7SER3	1	1329.74	12	Not Found	High	High	Not Found	High	High	Not Found	High	High	High	2	0.0544	0	1	1	1	665.373	0.65	0.00043	28.5082	0.0008107	1.493e-05	1.725	4.41
High	Unambiguous	KNVNSLTPTDIKDLR			7.93915e-06	0.00133933	2.316	1	1	4	A0A6P7SER3	hemocyanin 1-like OS=Octopus vulgaris OX=6645 GN=LOC115212215 PE=4 SV=2	A0A6P7SER3	2	1713.95	15	Not Found	High	High	Not Found	High	High	Not Found	High	High	High	3	0.2194	0	1	1	1	571.988	-0.38	-0.00022	36.6335	0.0008107	5.648e-07	2.316	5.56
High	Unambiguous	LDISWLQGTELPHCIPSNAHLDR	1xCarbamidomethyl [C14]	1xCarbamidomethyl [C14]	3.93433e-06	0.00133933	2.469	1	1	4	A0A6P7TXP9	uncharacterized protein LOC115231284 OS=Octopus vulgaris OX=6645 GN=LOC115231284 PE=4 SV=1	A0A6P7TXP9	0	2672.32	23	Not Found	High	High	Not Found	High	High	Not Found	High	High	High	3	0.5207	0	1	1	1	891.446	-0.02	-2e-05	62.2193	0.0008107	2.421e-07	2.469	3.86
High	Unambiguous	NVNSLTPSDIKDLR			2.58185e-05	0.00133933	2.059	2	2	4	A0A6P7SDC4; Cluster-58773.162319;orf1 len=2921 frame:3 start:24 end:8786 gi	hemocyanin G-type, units Oda to Odg OS=Octopus vulgaris OX=6645 GN=LOC115211670 PE=4 SV=2 16596797 gb|AAK28276.2| hemocyanin G-type [Enteroctopus dofleini]	A0A6P7SDC4; Cluster-58773.162319;orf1 len=2921 frame:3 start:24 end:8786 gi	1	1571.84	14	Not Found	High	High	Not Found	High	High	Not Found	High	High	High	2	0.6302	0	1	1	1	786.423	0.53	0.00041	43.4964	0.0008107	2.351e-06	2.059	3.11
High	Unambiguous	LDNLVAILDVNR			0.000376451	0.00133933	1.475	1	3	2	A0A6P7SAW7	transketolase OS=Octopus vulgaris OX=6645 GN=LOC115210747 PE=4 SV=1	A0A0L8HW75; A0A6P7SAW7; Cluster-58773.128728;orf1 len=632 frame:1 start:466 end:2361 gi	0	1354.77	12	Not Found	High	High	Not Found	High	High	Not Found	High	High	High	2	0.4478	0	1	1	1	677.888	-0.53	-0.00036	67.3505	0.0008107	5.978e-05	1.475	4.02
High	Unambiguous	LEDELLAEK			0.00220089	0.00133933	1.09	1	20	1	A0A7E6ET70	tropomyosin Tod p 1.0102 isoform X27 OS=Octopus vulgaris OX=6645 GN=LOC115210626 PE=3 SV=1	Q2V0V4; Q8IS67; A0A812ETR1; Q2V0V3; Q2V0V2; A0A812EVQ1; Cluster-58773.159326;orf1 len=288 frame:3 start:672 end:1535 gi; A0A812EWN4; A0A812EQL1; A0A6P7SA32; A0A812ERB9; Cluster-58773.159342;orf1 len=51 frame:1 start:3151 end:3303 gi; A0A6P7SAT1; F6JYD0; Q2V0V1; A0A0L8HB64; A0A6P7SAB5; A0A7E6ET70; Q2V0V0; A0A6P7S9V4	0	1059.56	9	Not Found	High	Not Found	Not Found	High	Not Found	Not Found	High	Not Found	High	2	0.4593	0	1	1	1	530.282	-0.65	-0.00034	41.9955	0.0008107	0.0005042	1.09	3.07
High	Unambiguous	IGEEFEETTADGRK			1.06004e-05	0.00133933	2.253	1	3	4	Cluster-58773.194608;orf1 len=190 frame:3 start:591 end:1160 gi	220683564 gb|ACL80558.1| sodium-calcium exchanger [Doryteuthis pealeii]	Cluster-58773.194608;orf1 len=190 frame:3 start:591 end:1160 gi; A0A6P7TN79; Cluster-58773.194607;orf1 len=188 frame:-2 start:668 end:105 gi	1	1581.74	14	Not Found	High	High	Not Found	High	High	Not Found	High	High	High	2	0.5677	0	1	1	1	791.376	3.04	0.00241	31.9058	0.0008107	8.034e-07	2.253	3.47
High	Unambiguous	LGEGVTNLSVGDR			0.000115236	0.00133933	1.733	1	2	1	A0A6P7TFA3	Polyol dehydrogenase OS=Octopus vulgaris OX=6645 GN=LOC115223465 PE=3 SV=1	Cluster-58773.77487;orf1 len=358 frame:3 start:117 end:1190 gi; A0A6P7TFA3	0	1316.68	13	Not Found	High	Not Found	Not Found	High	Not Found	Not Found	High	Not Found	High	2	0.5777	0	1	1	1	658.844	-0.25	-0.00016	43.3857	0.0008107	1.429e-05	1.733	3.86
High	Unambiguous	LGFTGSTPIGK			0.000718861	0.00133933	1.334	1	7	3	A0A7E6EW98	10-formyltetrahydrofolate dehydrogenase OS=Octopus vulgaris OX=6645 GN=LOC115216749 PE=3 SV=1	A0A812CSF1; A0A812D0Z1; Cluster-58773.117023;orf1 len=941 frame:1 start:895 end:3717 gi; A0A0L8GLQ4; A0A7E6EW98; Cluster-58773.117018;orf1 len=857 frame:1 start:895 end:3465 gi; A0A6P7SVA2	0	1077.59	11	High	High	High	High	High	High	High	High	High	High	2	0.6101	0	1	1	1	539.301	0.19	0.0001	43.4714	0.0008107	0.0001305	1.334	2.77
High	Unambiguous	LGKPILMSTCVK	1xCarbamidomethyl [C10]; 1xOxidation [M7]	1xCarbamidomethyl [C10]; 1xOxidation [M7]	0.000667987	0.00133933	1.35	2	5	1	A0A6P7TG88; Cluster-58773.135700;orf1 len=265 frame:3 start:75 end:869 gi	chymotrypsin B-like OS=Octopus vulgaris OX=6645 GN=LOC115222971 PE=4 SV=1 283837550 dbj|BAI66447.1| serine protease 1 [Heterololigo bleekeri]	Cluster-58773.135698;orf1 len=248 frame:3 start:108 end:851 gi; A0A6P7TG88; Cluster-58773.135695;orf1 len=209 frame:-2 start:634 end:8 gi; Cluster-58773.135699;orf1 len=156 frame:2 start:296 end:763 gi; Cluster-58773.135700;orf1 len=265 frame:3 start:75 end:869 gi	0	1362.75	12	Not Found	Not Found	High	Not Found	Not Found	High	Not Found	Not Found	High	High	3	0.5776	0	1	1	1	454.92	-1.63	-0.00074	30.143	0.0008107	0.0001191	1.35	2.77
High	Unambiguous	LGIDDIDVSDQR			0.00040886	0.00133933	1.457	1	2	1	A0A6P7T0G1	Phosphoglycerate kinase OS=Octopus vulgaris OX=6645 GN=LOC115218470 PE=3 SV=1	Cluster-58773.161610;orf1 len=425 frame:1 start:292 end:1566 gi; A0A6P7T0G1	0	1345.66	12	Not Found	High	Not Found	Not Found	High	Not Found	Not Found	High	Not Found	High	2	0.6457	0	1	1	1	673.333	0.1	7e-05	51.853	0.0008107	6.595e-05	1.457	3.5
High	Unambiguous	IGIPTVDVGSPQLSMHSIR	1xOxidation [M15]	1xOxidation [M15]	7.66002e-05	0.00133933	1.822	1	3	1	A0A6P7T7W6	Aspartyl aminopeptidase OS=Octopus vulgaris OX=6645 GN=LOC115220844 PE=3 SV=1	A0A6P7T7W6; Cluster-58773.204280;orf1 len=497 frame:3 start:759 end:2249 sp; A0A0L8IA05	0	2023.06	19	Not Found	Not Found	High	Not Found	Not Found	High	Not Found	Not Found	High	High	3	0.4354	0	1	1	1	675.027	1.31	0.00088	52.2355	0.0008107	8.741e-06	1.822	3.79
High	Unambiguous	LGQSDPTPLQHDVEVYK			4.16088e-05	0.00133933	1.955	1	3	2	A0A6P7SAW7	transketolase OS=Octopus vulgaris OX=6645 GN=LOC115210747 PE=4 SV=1	A0A0L8HW75; A0A6P7SAW7; Cluster-58773.128728;orf1 len=632 frame:1 start:466 end:2361 gi	0	1925.96	17	Not Found	High	High	Not Found	High	High	Not Found	High	High	High	3	0.4041	0	1	1	1	642.657	-1.58	-0.00101	42.4001	0.0008107	4.179e-06	1.955	3.86
High	Unambiguous	LGQTWTTLVK			0.00141079	0.00133933	1.187	1	1	2	A0A6P7T8U5	uncharacterized protein LOC115221216 OS=Octopus vulgaris OX=6645 GN=LOC115221216 PE=4 SV=1	A0A6P7T8U5	0	1146.65	10	Not Found	High	High	Not Found	High	High	Not Found	High	High	High	2	0.4676	0	1	1	1	573.83	0.07	4e-05	50.9136	0.0008107	0.000295	1.187	2.93
High	Unambiguous	LGTAVAIPSVSGSVK			0.00110131	0.00133933	1.241	1	2	1	A0A6P7SJH5	cytosolic non-specific dipeptidase OS=Octopus vulgaris OX=6645 GN=LOC115213824 PE=3 SV=1	Cluster-58773.186313;orf1 len=502 frame:3 start:3 end:1508 gi; A0A6P7SJH5	0	1385.8	15	Not Found	Not Found	High	Not Found	Not Found	High	Not Found	Not Found	High	High	2	0.5893	0	1	1	1	693.402	-1.55	-0.00107	49.0413	0.0008107	0.0002185	1.241	3.19
High	Unambiguous	IGVPEEIADK			0.00204526	0.00133933	1.106	1	1	2	A0A6P7TFF7	uncharacterized protein LOC115223512 OS=Octopus vulgaris OX=6645 GN=LOC115223512 PE=4 SV=1	A0A6P7TFF7	0	1070.57	10	Not Found	High	High	Not Found	High	High	Not Found	High	High	High	2	0.4583	0	1	1	1	535.79	-0.75	-0.0004	41.1206	0.0008107	0.0004605	1.106	2.64
High	Unambiguous	LGVWFSDASVADK			0.00163376	0.00133933	1.155	1	4	1	A0A6P7U7W9	putative aminopeptidase W07G4.4 isoform X1 OS=Octopus vulgaris OX=6645 GN=LOC115232621 PE=3 SV=1	Cluster-58773.206032;orf1 len=531 frame:1 start:643 end:2235 gi; Cluster-58773.206031;orf1 len=235 frame:-1 start:705 end:1 gi; A0A7E6FRC1; A0A6P7U7W9	0	1394.7	13	Not Found	High	Not Found	Not Found	High	Not Found	Not Found	High	Not Found	High	2	0.5944	0	1	1	1	697.851	-0.73	-0.00051	59.9639	0.0008107	0.000351	1.155	2.49
High	Unambiguous	IGEEFEETTADGR			4.7925e-06	0.00133933	2.426	1	3	2	Cluster-58773.194608;orf1 len=190 frame:3 start:591 end:1160 gi	220683564 gb|ACL80558.1| sodium-calcium exchanger [Doryteuthis pealeii]	Cluster-58773.194608;orf1 len=190 frame:3 start:591 end:1160 gi; A0A6P7TN79; Cluster-58773.194607;orf1 len=188 frame:-2 start:668 end:105 gi	0	1453.64	13	Not Found	High	High	Not Found	High	High	Not Found	High	High	High	2	0.5702	0	1	1	1	727.324	-1.76	-0.00128	39.2208	0.0008107	3.087e-07	2.426	3.49
High	Unambiguous	LKVSNAELGER			0.000640969	0.00133933	1.359	3	3	2	A0A6P7T042; Cluster-58773.164376;orf1 len=615 frame:1 start:1 end:1845 gi; A0A0L8G7X1	LOW QUALITY PROTEIN: paramyosin-like OS=Octopus vulgaris OX=6645 GN=LOC115218392 PE=4 SV=1 762093591 ref|XP_011429255.1| PREDICTED: paramyosin-like isoform X1 [Crassostrea gigas] Uncharacterized protein OS=Octopus bimaculoides OX=37653 GN=OCBIM_22038393mg PE=4 SV=1	A0A6P7T042; Cluster-58773.164376;orf1 len=615 frame:1 start:1 end:1845 gi; A0A0L8G7X1	1	1215.67	11	Not Found	High	Not Found	Not Found	High	Not Found	Not Found	High	Not Found	High	3	0.4898	0	1	1	1	405.892	-7.52	-0.00305	26.9704	0.0008107	0.0001133	1.359	3.92
High	Unambiguous	ILDPNVVGTEHYEIAR			1.88982e-05	0.00133933	2.127	1	2	1	A0A6P7SRT8	ATP synthase subunit beta OS=Octopus vulgaris OX=6645 GN=LOC115215584 PE=3 SV=1	A0A6P7SRT8; A0A0L8HS44	0	1825.94	16	Not Found	High	Not Found	Not Found	High	Not Found	Not Found	High	Not Found	High	3	0.5612	0	1	1	1	609.319	-1.65	-0.001	47.7046	0.0008107	1.616e-06	2.127	3.35
High	Unambiguous	IIEADSEDTEPAPDGR			3.11052e-07	0.00133933	3.022	1	24	1	A0A7E6FAL0	protein hu-li tai shao isoform X12 OS=Octopus vulgaris OX=6645 GN=LOC115218883 PE=3 SV=1	A0A7E6FAL0; A0A6P7T1W5; A0A6P7T1W2; A0A7E6FC95; A0A6P7T2W5; Cluster-58773.147689;orf1 len=675 frame:2 start:341 end:2365 gi; A0A7E6FAJ5; A0A7E6F9Y9; A0A6P7T2V8; Cluster-58773.147692;orf1 len=704 frame:2 start:362 end:2473 gi; Cluster-58773.147690;orf1 len=687 frame:1 start:19 end:2079 gi; A0A6P7T307; A0A7E6FB89; Cluster-58773.147675;orf1 len=129 frame:-3 start:388 end:2 gi; Cluster-58773.147688;o…	0	1714.78	16	Not Found	High	Not Found	Not Found	High	Not Found	Not Found	High	Not Found	High	2	0.7277	0	1	1	1	857.893	0.7	0.0006	33.5192	0.0008107	1.136e-08	3.022	3.82
High	Unambiguous	LLGLNQNSHFR			0.000612228	0.00133933	1.369	6	7	6	A0A6P7SER3; A0A0L8FFZ3; Q9BJ58; O61363; A0A6P7SDC4; Cluster-58773.162319;orf1 len=2921 frame:3 start:24 end:8786 gi	hemocyanin 1-like OS=Octopus vulgaris OX=6645 GN=LOC115212215 PE=4 SV=2 Tyrosinase_Cu-bd domain-containing protein (Fragment) OS=Octopus bimaculoides OX=37653 GN=OCBIM_22022789mg PE=4 SV=1 Hemocyanin G-type (Fragment) OS=Enteroctopus dofleini OX=267067 PE=4 SV=2 Hemocyanin G-type, units Oda to Odg OS=Enteroctopus dofleini OX=267067 GN=ODHCY PE=1 SV=1 hemocyanin G-type, units Oda to Odg OS=Octopus…	A0A6P7SER3; A0A0L8FFZ3; Cluster-58773.162316;orf1 len=2526 frame:3 start:24 end:7601 gi; Q9BJ58; O61363; A0A6P7SDC4; Cluster-58773.162319;orf1 len=2921 frame:3 start:24 end:8786 gi	0	1298.7	11	High	High	High	High	High	High	High	High	High	High	2	0.5606	0	1	1	1	649.855	5.5	0.00357	38.3704	0.0008107	0.0001077	1.369	3.71
High	Unambiguous	LLLGEGNPAIVENR			1.30317e-05	0.00133933	2.208	1	2	2	A0A6P7T5D5	Aspartate aminotransferase OS=Octopus vulgaris OX=6645 GN=LOC115219838 PE=3 SV=1	A0A7E6FDQ4; A0A6P7T5D5	0	1494.83	14	Not Found	High	High	Not Found	High	High	Not Found	High	High	High	2	0.677	0	1	1	1	747.918	0.17	0.00013	51.7568	0.0008107	1.028e-06	2.208	2.91
High	Unambiguous	IILKPIEKPAHDAWGGGLR			0.000452283	0.00133933	1.435	1	4	1	A0A6P7TH79	Ferritin OS=Octopus vulgaris OX=6645 GN=LOC115223217 PE=3 SV=1	Cluster-58773.169117;orf1 len=161 frame:-3 start:859 end:377 gi; A0A6P7TH79; A0A7E6FJW9; Cluster-58773.169115;orf1 len=182 frame:3 start:411 end:956 gi	0	2071.18	19	Not Found	Not Found	High	Not Found	Not Found	High	Not Found	Not Found	High	High	4	0.6569	0	1	1	1	518.55	-2.35	-0.00122	40.8537	0.0008107	7.463e-05	1.435	4.11
High	Unambiguous	IIQPEEGASYEALLK			0.000696144	0.00133933	1.341	1	5	1	A0A7E6EW98	10-formyltetrahydrofolate dehydrogenase OS=Octopus vulgaris OX=6645 GN=LOC115216749 PE=3 SV=1	Cluster-58773.117023;orf1 len=941 frame:1 start:895 end:3717 gi; A0A0L8GLQ4; A0A7E6EW98; Cluster-58773.117018;orf1 len=857 frame:1 start:895 end:3465 gi; A0A6P7SVA2	0	1660.88	15	Not Found	High	Not Found	Not Found	High	Not Found	Not Found	High	Not Found	High	2	0.6377	0	1	1	1	830.945	2.01	0.00167	56.5095	0.0008107	0.0001256	1.341	3.34
High	Unambiguous	IIQPEEGASYEALLKK			0.00124649	0.00133933	1.214	1	5	2	A0A7E6EW98	10-formyltetrahydrofolate dehydrogenase OS=Octopus vulgaris OX=6645 GN=LOC115216749 PE=3 SV=1	Cluster-58773.117023;orf1 len=941 frame:1 start:895 end:3717 gi; A0A0L8GLQ4; A0A7E6EW98; Cluster-58773.117018;orf1 len=857 frame:1 start:895 end:3465 gi; A0A6P7SVA2	1	1788.97	16	Not Found	High	High	Not Found	High	High	Not Found	High	High	High	3	0.6277	0	1	1	1	596.995	-2.3	-0.00137	48.4019	0.0008107	0.0002538	1.214	2.74
High	Unambiguous	ILSASEATLR			0.00092941	0.00133933	1.278	2	2	1	Cluster-58773.197059;orf1 len=509 frame:1 start:352 end:1878 gi; A0A6P7TMY2	260816652 ref|XP_002603202.1| hypothetical protein BRAFLDRAFT_281736 [Branchiostoma floridae]>gi|229288519|gb|EEN59213.1| hypothetical protein BRAFLDRAFT_281736 [Branchiostoma floridae] Fumarylacetoacetase OS=Octopus vulgaris OX=6645 GN=LOC115226547 PE=3 SV=2	Cluster-58773.197059;orf1 len=509 frame:1 start:352 end:1878 gi; A0A6P7TMY2	0	1060.6	10	Not Found	Not Found	High	Not Found	Not Found	High	Not Found	Not Found	High	High	2	0.3793	0	1	1	1	530.804	0.64	0.00034	36.9402	0.0008107	0.0001779	1.278	2.9
High	Unambiguous	IISSLEQKEDSKGNEQR			2.1787e-05	0.00133933	2.096	2	3	2	A0A0L8FRZ6; Cluster-58773.161692;orf1 len=264 frame:-3 start:814 end:23 gi	14_3_3 domain-containing protein OS=Octopus bimaculoides OX=37653 GN=OCBIM_22009637mg PE=3 SV=1 512130272 gb|AGN96214.1| 14-3-3 protein epsilon [Octopus bimaculoides]	A0A0L8FRZ6; Cluster-58773.161692;orf1 len=264 frame:-3 start:814 end:23 gi; A0A6P7T067	2	1960.99	17	Not Found	High	Not Found	Not Found	High	Not Found	Not Found	High	Not Found	High	4	0.5278	0	1	1	1	491.004	1.16	0.00057	21.2381	0.0008107	1.92e-06	2.096	4.68
High	Unambiguous	LITLNFENGLR			0.00025255	0.00133933	1.562	5	10	4	Q27Q56; A0A6P7SER3; A0A6P7SDC4; Cluster-58773.162319;orf1 len=2921 frame:3 start:24 end:8786 gi; A0A7E6FRZ6	Hemocyanin subunit 2 (Fragment) OS=Sepia officinalis OX=6610 PE=2 SV=1 hemocyanin 1-like OS=Octopus vulgaris OX=6645 GN=LOC115212215 PE=4 SV=2 hemocyanin G-type, units Oda to Odg OS=Octopus vulgaris OX=6645 GN=LOC115211670 PE=4 SV=2 16596797 gb|AAK28276.2| hemocyanin G-type [Enteroctopus dofleini] hemocyanin G-type, units Oda to Odg-like OS=Octopus vulgaris OX=6645 GN=LOC115225590 PE=4 SV=1	Q27Q57; A0A812CV46; Q27Q56; A0A812CXG7; A0A6P7SER3; Cluster-58773.162316;orf1 len=2526 frame:3 start:24 end:7601 gi; A0A6P7SDC4; Q5XLV2; Cluster-58773.162319;orf1 len=2921 frame:3 start:24 end:8786 gi; A0A7E6FRZ6	0	1289.72	11	High	High	High	High	High	High	High	High	High	High	2	0	0	1	1	1	645.364	0.17	0.00011	67.6981	0.0008107	3.686e-05	1.562	2.64
High	Unambiguous	LITLNFENGLRR			5.02217e-05	0.00133933	1.914	5	9	4	Q27Q56; A0A6P7SER3; A0A6P7SDC4; Cluster-58773.162319;orf1 len=2921 frame:3 start:24 end:8786 gi; A0A7E6FRZ6	Hemocyanin subunit 2 (Fragment) OS=Sepia officinalis OX=6610 PE=2 SV=1 hemocyanin 1-like OS=Octopus vulgaris OX=6645 GN=LOC115212215 PE=4 SV=2 hemocyanin G-type, units Oda to Odg OS=Octopus vulgaris OX=6645 GN=LOC115211670 PE=4 SV=2 16596797 gb|AAK28276.2| hemocyanin G-type [Enteroctopus dofleini] hemocyanin G-type, units Oda to Odg-like OS=Octopus vulgaris OX=6645 GN=LOC115225590 PE=4 SV=1	Q27Q57; A0A812CV46; Q27Q56; A0A812CXG7; A0A6P7SER3; Cluster-58773.162316;orf1 len=2526 frame:3 start:24 end:7601 gi; A0A6P7SDC4; Cluster-58773.162319;orf1 len=2921 frame:3 start:24 end:8786 gi; A0A7E6FRZ6	1	1445.82	12	Not Found	High	High	Not Found	High	High	Not Found	High	High	High	3	0	0	1	1	1	482.612	-0.71	-0.00034	51.898	0.0008107	5.251e-06	1.914	3.79
High	Unambiguous	ILCDNSNVVTIQADPFTK	1xCarbamidomethyl [C3]	1xCarbamidomethyl [C3]	0.000142971	0.00133933	1.686	2	4	3	Cluster-58773.74875;orf1 len=741 frame:2 start:1832 end:4054 gi; A0A7E6FFI6	159006 gb|AAA16244.1| peroxidase-like protein, partial [Euprymna scolopes] chorion peroxidase-like OS=Octopus vulgaris OX=6645 GN=LOC115221248 PE=4 SV=1	Cluster-58773.74875;orf1 len=741 frame:2 start:1832 end:4054 gi; A0A0L8HBF3; Cluster-58773.74874;orf1 len=142 frame:-3 start:441 end:16 gi; A0A7E6FFI6	0	2035.02	18	High	Not Found	High	High	Not Found	High	High	Not Found	High	High	2	0.5455	0	1	1	1	1018.01	-0.12	-0.00012	59.32	0.0008107	1.857e-05	1.686	3.08
High	Unambiguous	LGEEFDETTGDGR			0.000111083	0.00133933	1.741	1	5	2	A0A6P7U923	fatty acid-binding protein homolog 5 OS=Octopus vulgaris OX=6645 GN=LOC115232159 PE=4 SV=2	Cluster-58773.127070;orf1 len=152 frame:-1 start:490 end:35 gi; Cluster-58773.189921;orf1 len=162 frame:1 start:58 end:543 gi; A0A0L8H380; A0A6P7U923; Cluster-58773.189922;orf1 len=129 frame:1 start:283 end:669 gi	0	1425.61	13	Not Found	High	High	Not Found	High	High	Not Found	High	High	High	2	0.5608	0	1	1	1	713.31	0.37	0.00026	38.1725	0.0008107	1.369e-05	1.741	2.96
High	Unambiguous	IGEDFDSQTIDGR			5.53019e-05	0.00133933	1.893	1	7	1	A0A6P7TUU5	sodium/calcium exchanger regulatory protein 1 OS=Octopus vulgaris OX=6645 GN=LOC115226228 PE=3 SV=1	A0A6P7TUU5; Cluster-58773.142448;orf1 len=142 frame:-2 start:565 end:140 gi; Cluster-58773.185861;orf1 len=134 frame:-3 start:1110 end:709 gi; Cluster-58773.205872;orf1 len=116 frame:2 start:146 end:493 gi; Cluster-58773.136632;orf1 len=140 frame:2 start:146 end:565 gi; Cluster-58773.136631;orf1 len=90 frame:-2 start:271 end:2 gi; Cluster-58773.165375;orf1 len=133 frame:-2 start:1080 end:682 gi	0	1452.66	13	Not Found	High	Not Found	Not Found	High	Not Found	Not Found	High	Not Found	High	2	0.5152	0	1	1	1	726.834	0.19	0.00014	44.0013	0.0008107	5.906e-06	1.893	3.94
High	Unambiguous	LGAIFMPHGLGHFMGIDTHDVGGYNAGGER	2xOxidation [M6; M14]	2xOxidation [M6; M14]	7.59004e-05	0.00133933	1.824	1	5	1	Cluster-58773.104902;orf1 len=592 frame:3 start:618 end:2393 gi	524870221 ref|XP_005091896.1| PREDICTED: xaa-Pro dipeptidase-like [Aplysia californica]	Cluster-58773.104904;orf2 len=473 frame:2 start:2 end:1420 gi; Cluster-58773.104906;orf1 len=562 frame:3 start:618 end:2303 gi; Cluster-58773.104902;orf1 len=592 frame:3 start:618 end:2393 gi; A0A0L8HN83; Cluster-58773.104905;orf1 len=510 frame:2 start:101 end:1630 gi	0	3158.46	30	Not Found	Not Found	High	Not Found	Not Found	High	Not Found	Not Found	High	High	4	0.6705	0	1	1	1	790.371	1.6	0.00127	52.0756	0.0008107	8.636e-06	1.824	3.46
High	Unambiguous	LEDELLAEKER			0.000469192	0.00133933	1.427	1	20	2	A0A7E6ET70	tropomyosin Tod p 1.0102 isoform X27 OS=Octopus vulgaris OX=6645 GN=LOC115210626 PE=3 SV=1	Q2V0V4; Q8IS67; A0A812ETR1; Q2V0V3; Q2V0V2; A0A812EVQ1; Cluster-58773.159326;orf1 len=288 frame:3 start:672 end:1535 gi; A0A812EWN4; A0A812EQL1; A0A6P7SA32; A0A812ERB9; Cluster-58773.159342;orf1 len=51 frame:1 start:3151 end:3303 gi; A0A6P7SAT1; F6JYD0; Q2V0V1; A0A0L8HB64; A0A6P7SAB5; A0A7E6ET70; Q2V0V0; A0A6P7S9V4	1	1344.7	11	Not Found	High	Not Found	Not Found	High	Not Found	Not Found	High	Not Found	High	3	0.4656	0	1	1	1	448.905	-1.04	-0.00047	34.6866	0.0008107	7.788e-05	1.427	3.63
High	Unambiguous	IEDVTPIPSDSTR			3.36911e-05	0.00133933	2.001	1	4	1	A0A6P7SDZ2	40S ribosomal protein S14 OS=Octopus vulgaris OX=6645 GN=LOC115211938 PE=3 SV=1	Cluster-128635.0;orf1 len=159 frame:1 start:1 end:477 gi; Cluster-58773.177238;orf1 len=170 frame:2 start:5 end:514 gi; A0A6P7SDZ2; Cluster-58773.177234;orf1 len=185 frame:-1 start:580 end:26 gi	0	1429.72	13	Not Found	High	Not Found	Not Found	High	Not Found	Not Found	High	Not Found	High	2	0.5577	0	1	1	1	715.362	-0.3	-0.00021	41.9542	0.0008107	3.237e-06	2.001	3.12
High	Unambiguous	IEELEEELEAER			5.87012e-05	0.00133933	1.88	1	14	1	A0A6P7TRC4	myosin heavy chain, striated muscle OS=Octopus vulgaris OX=6645 GN=LOC115225111 PE=3 SV=2	V6A729; A0A812AWM7; Cluster-58773.160860;orf1 len=1941 frame:2 start:4361 end:10183 sp; F1ADJ4; G4V4Y6; G4V4Y8; A0A812AVW2; B2ZTQ6; V6A720; A0A6P7TRC4; O44934; B2ZTQ5; G4V4Y7; A0A812AXE2	0	1488.71	12	Not Found	High	Not Found	Not Found	High	Not Found	Not Found	High	Not Found	High	2	0.5	0	1	1	1	744.858	1.68	0.00125	50.9014	0.0008107	6.324e-06	1.88	3.7
High	Unambiguous	LEFVEAVQAQEHPQNAK			0.000153158	0.00133933	1.671	1	1	2	Cluster-58773.47482;orf1 len=193 frame:2 start:59 end:637 gi	443711424 gb|ELU05212.1| hypothetical protein CAPTEDRAFT_211623 [Capitella teleta]	Cluster-58773.47482;orf1 len=193 frame:2 start:59 end:637 gi	0	1937.97	17	Not Found	High	High	Not Found	High	High	Not Found	High	High	High	3	0.1104	0	1	1	1	646.665	4.33	0.0028	43.1488	0.0008107	2.02e-05	1.671	3.08
High	Unambiguous	IEGEAAVEQAK			0.000420272	0.00133933	1.451	1	3	1	A0A0L8HJ80	Major vault protein OS=Octopus bimaculoides OX=37653 GN=OCBIM_22013292mg PE=4 SV=1	A0A0L8HJ80; Cluster-58773.174087;orf1 len=911 frame:1 start:946 end:3678 gi; A0A6P7TRI5	0	1144.58	11	Not Found	Not Found	High	Not Found	Not Found	High	Not Found	Not Found	High	High	2	0.4204	0	1	1	1	572.797	1.56	0.00089	26.3644	0.0008107	6.823e-05	1.451	2.45
High	Unambiguous	LENNEGVIVSEDDHR			2.19675e-06	0.00133933	2.596	1	2	18	A0A6P7TQ10	uncharacterized protein LOC115225177 OS=Octopus vulgaris OX=6645 GN=LOC115225177 PE=4 SV=1	Cluster-58773.57631;orf1 len=635 frame:1 start:112 end:2016 gi; A0A6P7TQ10	0	1725.8	15	High	High	High	High	High	High	High	High	High	High	2	0.7119	0	1	1	1	863.407	1.85	0.00159	31.2029	0.0008107	1.203e-07	2.596	4.13
High	Unambiguous	LENVCDMGNFPVR	1xCarbamidomethyl [C5]	1xCarbamidomethyl [C5]	9.6354e-05	0.00133933	1.772	1	2	3	A0A6P7TQ10	uncharacterized protein LOC115225177 OS=Octopus vulgaris OX=6645 GN=LOC115225177 PE=4 SV=1	Cluster-58773.57631;orf1 len=635 frame:1 start:112 end:2016 gi; A0A6P7TQ10	0	1550.71	13	High	High	High	High	High	High	High	High	High	High	2	0.6016	0	1	1	1	775.859	0.93	0.00072	52.4533	0.0008107	1.155e-05	1.772	3.84
High	Unambiguous	LENVCDMGNFPVR	1xCarbamidomethyl [C5]; 1xOxidation [M7]	1xCarbamidomethyl [C5]; 1xOxidation [M7]	0.00141728	0.00133933	1.186	1	2	4	A0A6P7TQ10	uncharacterized protein LOC115225177 OS=Octopus vulgaris OX=6645 GN=LOC115225177 PE=4 SV=1	Cluster-58773.57631;orf1 len=635 frame:1 start:112 end:2016 gi; A0A6P7TQ10	0	1566.7	13	High	Not Found	High	High	Not Found	High	High	Not Found	High	High	2	0.6508	0	1	1	1	783.861	6.43	0.00504	43.11	0.0008107	0.0002963	1.186	2.52
High	Unambiguous	LEQTLDELEDNLER			6.37555e-05	0.00133933	1.862	1	15	1	A0A6P7TRC4	myosin heavy chain, striated muscle OS=Octopus vulgaris OX=6645 GN=LOC115225111 PE=3 SV=2	V6A729; A0A812AWM7; Cluster-58773.160860;orf1 len=1941 frame:2 start:4361 end:10183 sp; F1ADJ4; G4V4Y6; A0A0L8H7J6; G4V4Y8; A0A812AVW2; B2ZTQ6; V6A720; A0A6P7TRC4; O44934; B2ZTQ5; G4V4Y7; A0A812AXE2	0	1716.83	14	Not Found	High	Not Found	Not Found	High	Not Found	Not Found	High	Not Found	High	2	0.5693	0	1	1	1	858.92	2.51	0.00215	59.5351	0.0008107	7.012e-06	1.862	3.39
High	Unambiguous	IESHNPFNHGHISFISEDTMTK			0.000260793	0.00133933	1.555	3	4	1	A0A6P7SER3; A0A6P7SDC4; Cluster-58773.162319;orf1 len=2921 frame:3 start:24 end:8786 gi	hemocyanin 1-like OS=Octopus vulgaris OX=6645 GN=LOC115212215 PE=4 SV=2 hemocyanin G-type, units Oda to Odg OS=Octopus vulgaris OX=6645 GN=LOC115211670 PE=4 SV=2 16596797 gb|AAK28276.2| hemocyanin G-type [Enteroctopus dofleini]	A0A6P7SER3; Cluster-58773.162316;orf1 len=2526 frame:3 start:24 end:7601 gi; A0A6P7SDC4; Cluster-58773.162319;orf1 len=2921 frame:3 start:24 end:8786 gi	0	2541.18	22	Not Found	High	Not Found	Not Found	High	Not Found	Not Found	High	Not Found	High	4	0.4118	0	1	1	1	636.051	-0.62	-0.00039	43.8487	0.0008107	3.826e-05	1.555	3.57
High	Unambiguous	IESHNPFNHGHISFISEDTMTK	1xOxidation [M20]	1xOxidation [M20]	8.24355e-05	0.00133933	1.806	3	4	4	A0A6P7SER3; A0A6P7SDC4; Cluster-58773.162319;orf1 len=2921 frame:3 start:24 end:8786 gi	hemocyanin 1-like OS=Octopus vulgaris OX=6645 GN=LOC115212215 PE=4 SV=2 hemocyanin G-type, units Oda to Odg OS=Octopus vulgaris OX=6645 GN=LOC115211670 PE=4 SV=2 16596797 gb|AAK28276.2| hemocyanin G-type [Enteroctopus dofleini]	A0A6P7SER3; Cluster-58773.162316;orf1 len=2526 frame:3 start:24 end:7601 gi; A0A6P7SDC4; Cluster-58773.162319;orf1 len=2921 frame:3 start:24 end:8786 gi	0	2557.18	22	Not Found	High	High	Not Found	High	High	Not Found	High	High	High	4	0.3702	0	1	1	1	640.051	1.11	0.00071	40.1514	0.0008107	9.557e-06	1.806	5.43
High	Unambiguous	IESHNPFNHGHISFISEDTMTKR			0.00066493	0.00133933	1.351	3	4	1	A0A6P7SER3; A0A6P7SDC4; Cluster-58773.162319;orf1 len=2921 frame:3 start:24 end:8786 gi	hemocyanin 1-like OS=Octopus vulgaris OX=6645 GN=LOC115212215 PE=4 SV=2 hemocyanin G-type, units Oda to Odg OS=Octopus vulgaris OX=6645 GN=LOC115211670 PE=4 SV=2 16596797 gb|AAK28276.2| hemocyanin G-type [Enteroctopus dofleini]	A0A6P7SER3; Cluster-58773.162316;orf1 len=2526 frame:3 start:24 end:7601 gi; A0A6P7SDC4; Cluster-58773.162319;orf1 len=2921 frame:3 start:24 end:8786 gi	1	2697.28	23	Not Found	High	Not Found	Not Found	High	Not Found	Not Found	High	Not Found	High	5	0.5377	0	1	1	1	540.264	2.1	0.00113	40.1585	0.0008107	0.0001189	1.351	4.78
High	Unambiguous	IESHNPFNHGHISFISEDTMTKR	1xOxidation [M20]	1xOxidation [M20]	3.24768e-05	0.00133933	2.009	3	4	4	A0A6P7SER3; A0A6P7SDC4; Cluster-58773.162319;orf1 len=2921 frame:3 start:24 end:8786 gi	hemocyanin 1-like OS=Octopus vulgaris OX=6645 GN=LOC115212215 PE=4 SV=2 hemocyanin G-type, units Oda to Odg OS=Octopus vulgaris OX=6645 GN=LOC115211670 PE=4 SV=2 16596797 gb|AAK28276.2| hemocyanin G-type [Enteroctopus dofleini]	A0A6P7SER3; Cluster-58773.162316;orf1 len=2526 frame:3 start:24 end:7601 gi; A0A6P7SDC4; Cluster-58773.162319;orf1 len=2921 frame:3 start:24 end:8786 gi	1	2713.28	23	Not Found	High	High	Not Found	High	High	Not Found	High	High	High	4	0.4487	0	1	1	1	679.073	-3.1	-0.0021	36.2128	0.0008107	3.102e-06	2.009	6.24
High	Unambiguous	LESIPGFSVDQSK			0.00131701	0.00133933	1.202	1	2	2	Cluster-58773.83035;orf1 len=470 frame:3 start:477 end:1886 gi	554820859 ref|XP_005921157.1| PREDICTED: thymidine phosphorylase-like isoform X1 [Haplochromis burtoni]	Cluster-58773.83034;orf1 len=420 frame:3 start:477 end:1736 gi; Cluster-58773.83035;orf1 len=470 frame:3 start:477 end:1886 gi	0	1406.72	13	Not Found	High	High	Not Found	High	High	Not Found	High	High	High	2	0.5765	0	1	1	1	703.861	-0.91	-0.00064	53.2107	0.0008107	0.0002703	1.202	2.55
High	Unambiguous	LEVEAPFYKDPAPPGGK			7.41788e-05	0.00133933	1.829	1	13	1	Cluster-58773.136028;orf1 len=262 frame:2 start:116 end:901 gi	291233326 ref|XP_002736601.1| PREDICTED: UPF0462 protein C4orf33 homolog [Saccoglossus kowalevskii]	Cluster-58773.136030;orf1 len=246 frame:-3 start:739 end:2 gi; Cluster-58773.136031;orf1 len=233 frame:-3 start:700 end:2 gi; Cluster-58773.136029;orf1 len=146 frame:2 start:116 end:553 gi; Cluster-58773.136032;orf1 len=168 frame:2 start:116 end:619 gi; A0A6P7U1V5; Cluster-58773.136028;orf1 len=262 frame:2 start:116 end:901 gi; Cluster-58773.136033;orf1 len=223 frame:1 start:238 end:906 gi; Clust…	1	1814.93	17	Not Found	High	Not Found	Not Found	High	Not Found	Not Found	High	Not Found	High	3	0.5142	0	1	1	1	605.648	-1.34	-0.00081	47.226	0.0008107	8.424e-06	1.829	3.52
High	Unambiguous	IFAGFLLHGVK			0.00101404	0.00133933	1.259	4	6	5	A0A6P7SER3; A0A0L8FFZ3; A0A6P7SDC4; Cluster-58773.162319;orf1 len=2921 frame:3 start:24 end:8786 gi	hemocyanin 1-like OS=Octopus vulgaris OX=6645 GN=LOC115212215 PE=4 SV=2 Tyrosinase_Cu-bd domain-containing protein (Fragment) OS=Octopus bimaculoides OX=37653 GN=OCBIM_22022789mg PE=4 SV=1 hemocyanin G-type, units Oda to Odg OS=Octopus vulgaris OX=6645 GN=LOC115211670 PE=4 SV=2 16596797 gb|AAK28276.2| hemocyanin G-type [Enteroctopus dofleini]	A0A6P7SER3; A0A0L8FFZ3; Cluster-58773.162316;orf1 len=2526 frame:3 start:24 end:7601 gi; A0A6P7SDC4; Cluster-58773.162319;orf1 len=2921 frame:3 start:24 end:8786 gi; A0A077B1P8	0	1201.71	11	High	High	High	High	High	High	High	High	High	High	2	0.3478	0	1	1	1	601.358	-0.25	-0.00015	55.5524	0.0008107	0.0001979	1.259	2.99
High	Unambiguous	LFDINVNQLVR			0.00105678	0.00133933	1.25	1	2	1	A0A6P7TM22	Tetratricopeptide repeat protein 38 OS=Octopus vulgaris OX=6645 GN=LOC115223987 PE=3 SV=1	A0A6P7TM22; Cluster-58773.51696;orf1 len=475 frame:1 start:241 end:1665 gi	0	1330.75	11	Not Found	Not Found	High	Not Found	Not Found	High	Not Found	Not Found	High	High	2	0.3974	0	1	1	1	665.877	-0.28	-0.00019	65.8891	0.0008107	0.0002079	1.25	2.34
High	Unambiguous	IFDYLEGNLK			0.00103282	0.00133933	1.255	1	4	2	Cluster-58773.122645;orf1 len=203 frame:1 start:178 end:786 gi	481054003 gb|AGJ98458.1| glutathione-S-transferase [Sepiella maindroni]	Cluster-58773.122645;orf1 len=203 frame:1 start:178 end:786 gi; Cluster-58773.122643;orf1 len=166 frame:1 start:178 end:675 gi; A0A6P7SDT4; A0A6P7SEQ0	0	1211.63	10	Not Found	High	High	Not Found	High	High	Not Found	High	High	High	2	0.5596	0	1	1	1	606.319	0.58	0.00035	58.2344	0.0008107	0.0002022	1.255	3.02
High	Unambiguous	LFEQGDGPEFSR			0.000126893	0.00133933	1.712	1	3	1	A0A6P7TG90	Glutathione transferase OS=Octopus vulgaris OX=6645 GN=LOC115223852 PE=3 SV=1	A0A6P7TG90; Cluster-58773.178004;orf1 len=232 frame:1 start:55 end:750 gi; Cluster-58773.178003;orf1 len=258 frame:3 start:69 end:842 gi	0	1381.64	12	Not Found	High	Not Found	Not Found	High	Not Found	Not Found	High	Not Found	High	2	0.4944	0	1	1	1	691.322	-0.42	-0.00029	45.8732	0.0008107	1.61e-05	1.712	2.67
High	Unambiguous	LFESAPGQSLDLASMNIQR			1.71931e-08	0.00133933	3.653	2	6	1	Cluster-58773.74875;orf1 len=741 frame:2 start:1832 end:4054 gi; A0A7E6FFI6	159006 gb|AAA16244.1| peroxidase-like protein, partial [Euprymna scolopes] chorion peroxidase-like OS=Octopus vulgaris OX=6645 GN=LOC115221248 PE=4 SV=1	Cluster-58773.74875;orf1 len=741 frame:2 start:1832 end:4054 gi; Cluster-58773.68234;orf1 len=593 frame:1 start:244 end:2022 gi; Cluster-58773.252157;orf1 len=333 frame:3 start:18 end:1016 gi; Cluster-58773.74872;orf1 len=587 frame:2 start:1832 end:3592 gi; A0A7E6FFI6; Cluster-58773.74873;orf1 len=587 frame:3 start:486 end:2246 gi	0	2077.04	19	Not Found	High	Not Found	Not Found	High	Not Found	Not Found	High	Not Found	High	2	0.6849	0	1	1	1	1039.02	0.72	0.00075	63.6461	0.0008107	3.444e-10	3.653	4.57
High	Unambiguous	LFESAPGQSLDLASMNIQR	1xOxidation [M15]	1xOxidation [M15]	9.76895e-05	0.00133933	1.769	2	6	4	Cluster-58773.74875;orf1 len=741 frame:2 start:1832 end:4054 gi; A0A7E6FFI6	159006 gb|AAA16244.1| peroxidase-like protein, partial [Euprymna scolopes] chorion peroxidase-like OS=Octopus vulgaris OX=6645 GN=LOC115221248 PE=4 SV=1	Cluster-58773.74875;orf1 len=741 frame:2 start:1832 end:4054 gi; Cluster-58773.68234;orf1 len=593 frame:1 start:244 end:2022 gi; Cluster-58773.252157;orf1 len=333 frame:3 start:18 end:1016 gi; Cluster-58773.74872;orf1 len=587 frame:2 start:1832 end:3592 gi; A0A7E6FFI6; Cluster-58773.74873;orf1 len=587 frame:3 start:486 end:2246 gi	0	2093.03	19	High	High	High	High	High	High	High	High	High	High	2	0.4036	0	1	1	1	1047.02	1.78	0.00187	56.7479	0.0008107	1.171e-05	1.769	1.66
High	Unambiguous	LFVEESIHDEFVER			7.18341e-05	0.00133933	1.836	1	5	2	A0A7E6EW98	10-formyltetrahydrofolate dehydrogenase OS=Octopus vulgaris OX=6645 GN=LOC115216749 PE=3 SV=1	Cluster-58773.117023;orf1 len=941 frame:1 start:895 end:3717 gi; A0A0L8GLQ4; A0A7E6EW98; Cluster-58773.117018;orf1 len=857 frame:1 start:895 end:3465 gi; A0A6P7SVA2	0	1748.85	14	Not Found	High	High	Not Found	High	High	Not Found	High	High	High	3	0.2935	0	1	1	1	583.621	0.45	0.00026	53.3545	0.0008107	8.08e-06	1.836	3.68
High	Unambiguous	LFVVQFEQALHR			0.000297909	0.00133933	1.526	3	4	7	A0A6P7SER3; A0A6P7SDC4; Cluster-58773.162319;orf1 len=2921 frame:3 start:24 end:8786 gi	hemocyanin 1-like OS=Octopus vulgaris OX=6645 GN=LOC115212215 PE=4 SV=2 hemocyanin G-type, units Oda to Odg OS=Octopus vulgaris OX=6645 GN=LOC115211670 PE=4 SV=2 16596797 gb|AAK28276.2| hemocyanin G-type [Enteroctopus dofleini]	A0A6P7SER3; Cluster-58773.162316;orf1 len=2526 frame:3 start:24 end:7601 gi; A0A6P7SDC4; Cluster-58773.162319;orf1 len=2921 frame:3 start:24 end:8786 gi	0	1486.82	12	High	High	High	High	High	High	High	High	High	High	2	0.6056	0	1	1	1	743.912	0.02	1e-05	59.1516	0.0008107	4.494e-05	1.526	3.55
High	Unambiguous	IGAELNITPLIIR			0.00021117	0.00133933	1.601	1	7	2	A0A6P7TKE4	probable aminopeptidase NPEPL1 isoform X1 OS=Octopus vulgaris OX=6645 GN=LOC115223934 PE=3 SV=1	A0A0L8H5I4; A0A6P7TKE4; A0A6P7TNG7; Cluster-58773.200297;orf1 len=422 frame:3 start:3 end:1268 gi; Cluster-58773.200292;orf1 len=533 frame:3 start:3 end:1601 gi; Cluster-58773.200295;orf1 len=562 frame:3 start:3 end:1688 gi; Cluster-58773.200290;orf1 len=542 frame:3 start:3 end:1628 gi	0	1422.87	13	Not Found	High	High	Not Found	High	High	Not Found	High	High	High	2	0.616	0	1	1	1	711.937	-0.2	-0.00015	67.5077	0.0008107	2.964e-05	1.601	3.49
High	Unambiguous	LGAENFVFWGGR			5.11048e-06	0.00133933	2.412	1	5	1	Cluster-58773.93343;orf1 len=501 frame:1 start:1 end:1503 gi	762076444 ref|XP_011445523.1| PREDICTED: xylose isomerase-like [Crassostrea gigas]	Cluster-58773.93345;orf1 len=499 frame:2 start:110 end:1606 gi; A0A0L8H1I1; A0A812CYD7; A0A6P7SLX8; Cluster-58773.93343;orf1 len=501 frame:1 start:1 end:1503 gi	0	1352.67	12	Not Found	High	Not Found	Not Found	High	Not Found	Not Found	High	Not Found	High	2	0.6101	0	1	1	1	676.841	-0.03	-2e-05	66.1367	0.0008107	3.326e-07	2.412	3.95
High	Unambiguous	LDVSIKVPDASEPAIVSR			0.000376451	0.00133933	1.475	1	1	1	Cluster-58773.197059;orf1 len=509 frame:1 start:352 end:1878 gi	260816652 ref|XP_002603202.1| hypothetical protein BRAFLDRAFT_281736 [Branchiostoma floridae]>gi|229288519|gb|EEN59213.1| hypothetical protein BRAFLDRAFT_281736 [Branchiostoma floridae]	Cluster-58773.197059;orf1 len=509 frame:1 start:352 end:1878 gi	1	1896.04	18	Not Found	High	Not Found	Not Found	High	Not Found	Not Found	High	Not Found	High	3	0.6121	0	1	1	1	632.686	-0.47	-0.0003	54.0862	0.0008107	5.986e-05	1.475	3.79
High	Unambiguous	HYYVADEAAVK			0.00220089	0.00133933	1.09	1	3	1	A0A6P7T526	probable phosphoglycerate mutase OS=Octopus vulgaris OX=6645 GN=LOC115219769 PE=3 SV=1	Cluster-58773.158967;orf1 len=279 frame:1 start:337 end:1173 sp; Cluster-58773.158965;orf1 len=110 frame:-2 start:479 end:150 sp; A0A6P7T526	0	1265.62	11	Not Found	High	Not Found	Not Found	High	Not Found	Not Found	High	Not Found	High	2	0.6491	0	1	1	1	633.314	3.31	0.0021	28.1855	0.0008107	0.0005033	1.09	3.22
High	Unambiguous	NVNSLTPTDIKDLR			5.53019e-05	0.00133933	1.893	1	1	4	A0A6P7SER3	hemocyanin 1-like OS=Octopus vulgaris OX=6645 GN=LOC115212215 PE=4 SV=2	A0A6P7SER3	1	1585.85	14	Not Found	High	High	Not Found	High	High	Not Found	High	High	High	3	0.2705	0	1	1	1	529.291	1.95	0.00103	44.0702	0.0008107	5.911e-06	1.893	4.03
[truncated: 1,205 more rows]

## Sheet: PSMs
Confidence	Identifying Node Type	Identifying Node	Search ID	Identifying Node No	PSM Ambiguity	Sequence	Annotated Sequence	Modifications	# Proteins	Master Protein Accessions	Master Protein Descriptions	Protein Accessions	Protein Descriptions	# Missed Cleavages	Charge	Original Precursor Charge	DeltaScore	DeltaCn	Rank	Search Engine Rank	Concatenated Rank	m/z [Da]	MH+ [Da]	Theo. MH+ [Da]	DeltaM [ppm]	Deltam/z [Da]	Ions Matched	Matched Ions	Total Ions	Intensity	Activation Type	MS Order	Isolation Interference [%]	Ion Inject Time [ms]	RT [min]	First Scan	Last Scan	Master Scan(s)	Spectrum File	File ID	Peptides Matched	XCorr	# Protein Groups	Percolator q-Value	Percolator PEP	Percolator SVMScore
[truncated: 2,693 more rows]
