# Supplementary material for: Insights into Common Octopus (Octopus vulgaris) Ink Proteome and Bioactive Peptides Using Proteomic Approaches
Source: Mar Drugs. 2023 Mar 24;21(4):206. doi: 10.3390/md21040206 (PMC10142993; doi:10.3390/md21040206)
Supplement: Supplementary file 1 [file marinedrugs-21-00206-s001.zip › Supplementary File S3.xlsx]

## Sheet: Protein Class
Level 1		Name of Class	% gene hit	% functional hit	No. of genes
	1	extracellular matrix protein (PC00102)	0.013	0.015	53
	2	cytoskeletal protein (PC00085)	0.06	0.069	244
	3	transporter (PC00227)	0.042	0.048	170
	4	Scaffold/adaptor protein (PC00226)	0.031	0.035	125
	5	DNA metabolism protein (PC00009)	0.009	0.01	36
	6	cell adhesion molecule (PC00069)	0.006	0.007	25
	7	protein-binding activity modulator (PC00095)	0.019	0.022	77
	8	viral or transposable element protein (PC00237)	0.005	0.006	22
	9	RNA metabolism protein (PC00031)	0.01	0.012	42		Red color do not have gene in level 2
	10	calcium-binding protein (PC00060)	0.018	0.021	74
	11	gene-specific transcriptional regulator (PC00264)	0.001	0.001	4
	12	defense/immunity protein (PC00090)	0	0	1
	13	translational protein (PC00263)	0.027	0.03	108
	14	metabolite interconversion enzyme (PC00262)	0.465	0.529	1879
	15	protein modifying enzyme (PC00260)	0.086	0.098	347
	16	chromatin/chromatin-binding, or -regulatory protein (PC00077)	0.013	0.015	52
	17	transfer/carrier protein (PC00219)	0.006	0.007	25
	18	membrane traffic protein (PC00150)	0.017	0.019	67
	19	chaperone (PC00072)	0.036	0.041	147
	20	structural protein (PC00211)	0.009	0.011	38
	21	transmembrane signal receptor (PC00197)	0.003	0.004	13
Level 2
	5	DNA metabolism protein (PC00009)
	1	damaged DNA-binding protein (PC00086)	0.472	0.68	17
	2	DNA glycosylase (PC00010)	0.167	0.24	6
	3	DNA-directed DNA polymerase (PC00018)	0.056	0.08	2
	9	RNA metabolism protein (PC00031)
	1	RNA helicase (PC00032)	0.024	1	1
	10	calcium-binding protein (PC00060)
	1	calmodulin-related (PC00061)	0.743	1	55
	6	cell adhesion molecule (PC00069)
	1	immunoglobulin superfamily cell adhesion molecule (PC00125)	0.04	1	1
	19	chaperone (PC00072)
	1	Hsp90 family chaperone (PC00028)	0.122	0.168	18
	2	Hsp70 family chaperone (PC00027)	0.122	0.168	18
	3	chaperonin (PC00073)	0.483	0.664	71
	2	cytoskeletal protein (PC00085)
	1	actin or actin-binding cytoskeletal protein (PC00041)	0.779	0.779	190
	2	microtubule or microtubule-binding cytoskeletal protein (PC00157)	0.152	0.152	37
	3	intermediate filament (PC00129)	0.07	0.07	17
	12	defense/immunity protein (PC00090)
	1	immunoglobulin receptor superfamily (PC00124)	1	1	1
	1	extracellular matrix protein (PC00102)
	1	extracellular matrix structural protein (PC00103)	0.585	1	31
	11	gene-specific transcriptional regulator (PC00264)
	1	DNA-binding transcription factor (PC00218)	1	1	4
	18	membrane traffic protein (PC00150)
	1	vesicle coat protein (PC00235)	0.328	0.917	22
	2	membrane trafficking regulatory protein (PC00151)	0.03	0.083	2
	14	metabolite interconversion enzyme (PC00262)
	1	transferase (PC00220)	0.216	0.216	406
	2	isomerase (PC00135)	0.086	0.086	161
	3	hydrolase (PC00121)	0.21	0.21	395
	4	lyase (PC00144)	0.104	0.104	195
	5	ligase (PC00142)	0.011	0.011	20
	6	oxidoreductase (PC00176)	0.374	0.374	702
	15	protein modifying enzyme (PC00260)
	1	protein phosphatase (PC00195)	0.009	0.009	3
	2	non-receptor tyrosine protein kinase (PC00168)	0.063	0.064	22
	3	non-receptor serine/threonine protein kinase (PC00167)	0.017	0.017	6
	4	protease (PC00190)	0.761	0.763	264
	5	ubiquitin-protein ligase (PC00234)	0.147	0.147	51
	7	protein-binding activity modulator (PC00095)
	1	protease inhibitor (PC00191)	0.429	0.429	33
	2	G-protein modulator (PC00022)	0.26	0.26	20
	3	kinase modulator (PC00140)	0.013	0.013	1
	4	G-protein (PC00020)	0.299	0.299	23
	20	structural protein (PC00211)
	1	surfactant (PC00212)	0.184	1	7
	13	translational protein (PC00263)
	1	ribosomal protein (PC00202)	0.806	0.806	87
	2	aminoacyl-tRNA synthetase (PC00047)	0.139	0.139	15
	3	translation factor (PC00223)	0.056	0.056	6
	3	transporter (PC00227)
	1	ion channel (PC00133)	0.041	0.042	7
	2	primary active transporter (PC00068)	0.841	0.851	143
	3	secondary carrier transporter (PC00258)	0.106	0.107	18

## Sheet: Molecular Function
Level 1		Name of Function	No. of genes	% gene hit	% functional hit
	1	transporter activity (GO:0005215)	60	0.015	0.018
	2	translation regulator activity (GO:0045182)	19	0.005	0.006
	3	transcription regulator activity (GO:0140110)	2	0	0.001
	4	catalytic activity (GO:0003824)	1932	0.478	0.573
	5	molecular function regulator (GO:0098772)	70	0.017	0.021
	6	ATP-dependent activity (GO:0140657)	77	0.019	0.023
	7	molecular transducer activity (GO:0060089)	8	0.002	0.002
	8	molecular adaptor activity (GO:0060090)	3	0.001	0.001
	9	structural molecule activity (GO:0005198)	151	0.037	0.045
	10	binding (GO:0005488)	1052	0.26	0.312
Level 2
	6	ATP-dependent activity (GO:0140657)
	1	helicase activity (GO:0004386)	1	0.013	0.013
	2	ATP hydrolysis activity (GO:0016887)	77	1	0.987
	10	binding (GO:0005488)
	1	organic cyclic compound binding (GO:0097159)	370	0.352	0.147
	2	carbohydrate binding (GO:0030246)	40	0.038	0.016
	3	protein-containing complex binding (GO:0044877)	151	0.144	0.06
	4	heterocyclic compound binding (GO:1901363)	369	0.351	0.147
	5	carbohydrate derivative binding (GO:0097367)	168	0.16	0.067
	6	chromatin binding (GO:0003682)	7	0.007	0.003
	7	amide binding (GO:0033218)	9	0.009	0.004
	8	ion binding (GO:0043167)	525	0.499	0.209
	9	small molecule binding (GO:0036094)	291	0.277	0.116
	10	neurotransmitter binding (GO:0042165)	4	0.004	0.002
	11	hormone binding (GO:0042562)	1	0.001	0
	12	iron-sulfur cluster binding (GO:0051536)	25	0.024	0.01
	13	lipid binding (GO:0008289)	52	0.049	0.021
	14	protein binding (GO:0005515)	498	0.473	0.198
	4	catalytic activity (GO:0003824)
	1	transferase activity (GO:0016740)	348	0.18	0.151
	2	ligase activity (GO:0016874)	47	0.024	0.02
	3	catalytic activity, acting on a protein (GO:0140096)	274	0.142	0.119
	4	hydrolase activity (GO:0016787)	705	0.365	0.305
	5	catalytic activity, acting on a nucleic acid (GO:0140640)	18	0.009	0.008
	6	lyase activity (GO:0016829)	158	0.082	0.068
	7	oxidoreductase activity (GO:0016491)	534	0.276	0.231
	8	isomerase activity (GO:0016853)	208	0.108	0.09
	9	demethylase activity (GO:0032451)	19	0.01	0.008
	5	molecular function regulator (GO:0098772)
	1	enzyme regulator activity (GO:0030234)	70	1	1
	8	molecular adaptor activity (GO:0060090)
	1	protein-macromolecule adaptor activity (GO:0030674)	3	1	1
	7	molecular transducer activity (GO:0060089)
	1	signaling receptor activity (GO:0038023)	8	1	1
	9	structural molecule activity (GO:0005198)
	1	structural constituent of ribosome (GO:0003735)	85	0.563	0.563
	2	extracellular matrix structural constituent (GO:0005201)	13	0.086	0.086
	3	structural constituent of cytoskeleton (GO:0005200)	53	0.351	0.351
	3	transcription regulator activity (GO:0140110)
	1	DNA-binding transcription factor activity (GO:0003700)	2	1	1
	2	translation regulator activity (GO:0045182)
	1	translation regulator activity, nucleic acid binding (GO:0090079)	19	1	1
	1	transporter activity (GO:0005215)
	1	transmembrane transporter activity (GO:0022857)	41	0.683	0.683
	2	lipid transporter activity (GO:0005319)	19	0.317	0.317

## Sheet: Biological Process
Level 1		Name of Process	No. of genes	% functional hit	% gene hit
	1	cellular process (GO:0009987)	2214	0.548	0.375
	2	reproductive process (GO:0022414)	20	0.005	0.003
	3	localization (GO:0051179)	288	0.071	0.049
	4	biological process involved in interspecies interaction between organisms (GO:0044419)	3	0.001	0.001
	5	reproduction (GO:0000003)	20	0.005	0.003
	6	biological regulation (GO:0065007)	458	0.113	0.078
	7	response to stimulus (GO:0050896)	481	0.119	0.082
	8	pigmentation (GO:0043473)	38	0.009	0.006
	9	signaling (GO:0023052)	218	0.054	0.037
	10	developmental process (GO:0032502)	140	0.035	0.024
	11	multicellular organismal process (GO:0032501)	166	0.041	0.028
	12	locomotion (GO:0040011)	63	0.016	0.011
	13	biological adhesion (GO:0022610)	58	0.014	0.01
	14	metabolic process (GO:0008152)	1623	0.402	0.275
	15	growth (GO:0040007)	19	0.005	0.003
	16	immune system process (GO:0002376)	91	0.023	0.015
Level 2
	13	biological adhesion (GO:0022610)
	1	cell adhesion (GO:0007155)	58	1	1
	4	biological process involved in interspecies interaction between organisms (GO:0044419)
	1	response to other organism (GO:0051707)	3	1	1
	6	biological regulation (GO:0065007)
	1	regulation of biological process (GO:0050789)	356	0.777	0.585
	2	regulation of molecular function (GO:0065009)	50	0.109	0.082
	3	regulation of biological quality (GO:0065008)	203	0.443	0.333
	1	cellular process (GO:0009987)
	1	localization of cell (GO:0051674)	27	0.012	0.006
	2	cell wall organization or biogenesis (GO:0071554)	2	0.001	0
	3	cell division (GO:0051301)	21	0.009	0.005
	4	cellular localization (GO:0051641)	131	0.059	0.031
	5	export from cell (GO:0140352)	58	0.026	0.014
	6	cellular developmental process (GO:0048869)	115	0.052	0.027
	7	cell population proliferation (GO:0008283)	38	0.017	0.009
	8	syncytium formation (GO:0006949)	3	0.001	0.001
	9	cellular process involved in reproduction in multicellular organism (GO:0022412)	1	0	0
	10	cellular metabolic process (GO:0044237)	1491	0.673	0.356
	11	cell recognition (GO:0008037)	1	0	0
	12	vesicle-mediated transport (GO:0016192)	138	0.062	0.033
	13	exocytic process (GO:0140029)	58	0.026	0.014
	14	execution phase of apoptosis (GO:0097194)	18	0.008	0.004
	15	cell adhesion (GO:0007155)	58	0.026	0.014
	16	cell cycle (GO:0007049)	74	0.033	0.018
	17	cell communication (GO:0007154)	220	0.099	0.053
	18	microtubule-based process (GO:0007017)	36	0.016	0.009
	19	maintenance of location in cell (GO:0051651)	3	0.001	0.001
	20	cellular component organization or biogenesis (GO:0071840)	439	0.198	0.105
	21	cell activation (GO:0001775)	72	0.033	0.017
	22	cellular response to stimulus (GO:0051716)	405	0.183	0.097
	23	actin filament-based process (GO:0030029)	129	0.058	0.031
	24	cell-cell fusion (GO:0140253)	3	0.001	0.001
	25	movement of cell or subcellular component (GO:0006928)	44	0.02	0.011
	26	cellular homeostasis (GO:0019725)	54	0.024	0.013
	27	transmembrane transport (GO:0055085)	59	0.027	0.014
	28	cell death (GO:0008219)	53	0.024	0.013
	29	signal transduction (GO:0007165)	198	0.089	0.047
	30	protein folding (GO:0006457)	145	0.065	0.035
	31	intermediate filament-based process (GO:0045103)	17	0.008	0.004
	32	cell cycle process (GO:0022402)	74	0.033	0.018
	10	developmental process (GO:0032502)
	1	developmental growth (GO:0048589)	19	0.136	0.046
	2	anatomical structure morphogenesis (GO:0009653)	84	0.6	0.202
	3	anatomical structure formation involved in morphogenesis (GO:0048646)	40	0.286	0.096
	4	cellular developmental process (GO:0048869)	115	0.821	0.276
	5	anatomical structure development (GO:0048856)	139	0.993	0.334
	6	developmental process involved in reproduction (GO:0003006)	19	0.136	0.046
	15	growth (GO:0040007)
	1	developmental growth (GO:0048589)	19	1	1
	16	immune system process (GO:0002376)
	1	leukocyte activation (GO:0045321)	72	0.791	0.326
	2	immune system development (GO:0002520)	35	0.385	0.158
	3	leukocyte migration (GO:0050900)	19	0.209	0.086
	4	immune effector process (GO:0002252)	38	0.418	0.172
	5	immune response (GO:0006955)	57	0.626	0.258
	3	localization (GO:0051179)
	1	maintenance of location (GO:0051235)	3	0.01	0.005
	2	macromolecule localization (GO:0033036)	124	0.431	0.226
	3	establishment of localization (GO:0051234)	244	0.847	0.444
	4	cellular localization (GO:0051641)	131	0.455	0.239
	5	localization of cell (GO:0051674)	27	0.094	0.049
	6	protein-containing complex localization (GO:0031503)	20	0.069	0.036
	12	locomotion (GO:0040011)
	1	taxis (GO:0042330)	55	0.873	0.671
	2	cell motility (GO:0048870)	27	0.429	0.329
	14	metabolic process (GO:0008152)
	1	organic substance metabolic process (GO:0071704)	1534	0.945	0.189
	2	NADP metabolic process (GO:0006739)	70	0.043	0.009
	3	biosynthetic process (GO:0009058)	563	0.347	0.069
	4	pigment metabolic process (GO:0042440)	59	0.036	0.007
	5	primary metabolic process (GO:0044238)	1258	0.775	0.155
	6	catabolic process (GO:0009056)	778	0.479	0.096
	7	cellular metabolic process (GO:0044237)	1491	0.919	0.184
	8	nitrogen compound metabolic process (GO:0006807)	1219	0.751	0.15
	9	ATP metabolic process (GO:0046034)	207	0.128	0.026
	10	small molecule metabolic process (GO:0044281)	871	0.537	0.108
	11	secondary metabolic process (GO:0019748)	20	0.012	0.002
	12	glycosylation (GO:0070085)	31	0.019	0.004
	11	multicellular organismal process (GO:0032501)
	1	multicellular organism reproduction (GO:0032504)	1	0.006	0.005
	2	endothelial cell migration (GO:0043542)	19	0.114	0.093
	3	multicellular organism development (GO:0007275)	97	0.584	0.475
	4	system process (GO:0003008)	68	0.41	0.333
	5	cytokine production (GO:0001816)	19	0.114	0.093
	8	pigmentation (GO:0043473)
	1	developmental pigmentation (GO:0048066)	19	0.5	1
	5	reproduction (GO:0000003)
	1	reproductive process (GO:0022414)	20	1	0.909
	2	multicellular organism reproduction (GO:0032504)	1	0.05	0.045
	3	sexual reproduction (GO:0019953)	1	0.05	0.045
	2	reproductive process (GO:0022414)
	1	cellular process involved in reproduction in multicellular organism (GO:0022412)	1	0.05	0.043
	2	sperm-egg recognition (GO:0035036)	1	0.05	0.043
	3	multi-organism reproductive process (GO:0044703)	1	0.05	0.043
	4	fertilization (GO:0009566)	1	0.05	0.043
	5	developmental process involved in reproduction (GO:0003006)	19	0.95	0.826
	7	response to stimulus (GO:0050896)
	1	response to biotic stimulus (GO:0009607)	3	0.006	0.003
	2	response to external stimulus (GO:0009605)	60	0.125	0.054
	3	response to stress (GO:0006950)	235	0.489	0.212
	4	response to abiotic stimulus (GO:0009628)	37	0.077	0.033
	5	response to chemical (GO:0042221)	255	0.53	0.231
	6	response to endogenous stimulus (GO:0009719)	54	0.112	0.049
	7	immune response (GO:0006955)	57	0.119	0.052
	8	cellular response to stimulus (GO:0051716)	405	0.842	0.366
	9	signaling (GO:0023052)
	1	cell-cell signaling (GO:0007267)	43	0.197	0.178
	2	signal transduction (GO:0007165)	198	0.908	0.822

## Sheet: Panther Pathway Analysis 
Pathway	No of gene	% gene hit	% functional hit
Glycolysis (P00024)	169	0.042	0.086
Integrin signalling pathway (P00034)	117	0.029	0.06
Ubiquitin proteasome pathway (P00060)	90	0.022	0.046
5-Hydroxytryptamine degredation (P04372)	85	0.021	0.043
Pentose phosphate pathway (P02762)	85	0.021	0.043
Mannose metabolism (P02752)	72	0.018	0.037
ATP synthesis (P02721)	70	0.017	0.036
Pyruvate metabolism (P02772)	62	0.015	0.032
Salvage pyrimidine ribonucleotides (P02775)	55	0.014	0.028
Inflammation mediated by chemokine and cytokine signaling pathway (P00031)	52	0.013	0.027
Heterotrimeric G-protein signaling pathway-Gi alpha and Gs alpha mediated pathway (P00026)	52	0.013	0.027
Huntington disease (P00029)	49	0.012	0.025
Nicotinic acetylcholine receptor signaling pathway (P00044)	47	0.012	0.024
Wnt signaling pathway (P00057)	41	0.01	0.021
Asparagine and aspartate biosynthesis (P02730)	39	0.01	0.02
Parkinson disease (P00049)	39	0.01	0.02
Cadherin signaling pathway (P00012)	39	0.01	0.02
N-acetylglucosamine metabolism (P02756)	37	0.009	0.019
Pyrimidine Metabolism (P02771)	36	0.009	0.018
Cytoskeletal regulation by Rho GTPase (P00016)	34	0.008	0.017
Salvage pyrimidine deoxyribonucleotides (P02774)	34	0.008	0.017
Gonadotropin-releasing hormone receptor pathway (P06664)	30	0.007	0.015
Methylcitrate cycle (P02754)	23	0.006	0.012
FAS signaling pathway (P00020)	23	0.006	0.012
Ionotropic glutamate receptor pathway (P00037)	22	0.005	0.011
Synaptic vesicle trafficking (P05734)	22	0.005	0.011
Serine glycine biosynthesis (P02776)	22	0.005	0.011
Muscarinic acetylcholine receptor 2 and 4 signaling pathway (P00043)	22	0.005	0.011
Muscarinic acetylcholine receptor 1 and 3 signaling pathway (P00042)	22	0.005	0.011
De novo purine biosynthesis (P02738)	20	0.005	0.01
Angiogenesis (P00005)	19	0.005	0.01
Alzheimer disease-presenilin pathway (P00004)	20	0.005	0.01
Phenylethylamine degradation (P02766)	20	0.005	0.01
Adenine and hypoxanthine salvage pathway (P02723)	20	0.005	0.01
Methionine biosynthesis (P02753)	19	0.005	0.01
De novo pyrimidine deoxyribonucleotide biosynthesis (P02739)	17	0.004	0.009
Apoptosis signaling pathway (P00006)	18	0.004	0.009
Nicotine pharmacodynamics pathway (P06587)	17	0.004	0.009
Heterotrimeric G-protein signaling pathway-rod outer segment phototransduction (P00028)	18	0.004	0.009
Heterotrimeric G-protein signaling pathway-Gq alpha and Go alpha mediated pathway (P00027)	18	0.004	0.009
O-antigen biosynthesis (P02757)	18	0.004	0.009
T cell activation (P00053)	18	0.004	0.009
Tyrosine biosynthesis (P02784)	17	0.004	0.009
Dopamine receptor mediated signaling pathway (P05912)	17	0.004	0.009
B cell activation (P00010)	18	0.004	0.009
De novo pyrimidine ribonucleotides biosythesis (P02740)	17	0.004	0.009
p53 pathway by glucose deprivation (P04397)	16	0.004	0.008
FGF signaling pathway (P00021)	15	0.004	0.008
EGF receptor signaling pathway (P00018)	16	0.004	0.008
DNA replication (P00017)	15	0.004	0.008
Angiotensin II-stimulated signaling through G proteins and beta-arrestin (P05911)	15	0.004	0.008
TCA cycle (P00051)	14	0.003	0.007
Lysine biosynthesis (P02751)	10	0.002	0.005
Threonine biosynthesis (P02781)	9	0.002	0.005
Hedgehog signaling pathway (P00025)	7	0.002	0.004
Isoleucine biosynthesis (P02748)	7	0.002	0.004
Toll pathway-drosophila (P06217)	7	0.002	0.004
Arginine biosynthesis (P02728)	3	0.001	0.002
Vitamin D metabolism and pathway (P04396)	3	0.001	0.002
Blood coagulation (P00011)	4	0.001	0.002
Cobalamin biosynthesis (P02735)	2	0	0.001
Androgen/estrogene/progesterone biosynthesis (P02727)	1	0	0.001
Ornithine degradation (P02758)	2	0	0.001
Allantoin degradation (P02725)	1	0	0.001
Toll receptor signaling pathway (P00054)	1	0	0.001
Endothelin signaling pathway (P00019)	1	0	0.001
PI3 kinase pathway (P00048)	1	0	0.001
Cholesterol biosynthesis (P00014)	2	0	0.001
Heme biosynthesis (P02746)	1	0	0.001
CCKR signaling map (P06959)	1	0	0.001

## Sheet: InterPro Domain Search By DAVID
Category	Term	RT	Count	%	P-Value	Benjamini
INTERPRO	GroES-like	RT	4	2.9	2.10 × 10-04	7.70 × 10-02
INTERPRO	Aldolase-type TIM barrel	RT	4	2.9	3.10 × 10-03	2.80 × 10-01
INTERPRO	TCP-1-like chaperonin intermediate domain	RT	3	2.2	3.30 × 10-03	2.80 × 10-01
INTERPRO	GroEL-like equatorial domain	RT	3	2.2	3.90 × 10-03	2.80 × 10-01
INTERPRO	GroEL-like apical domain	RT	3	2.2	4.60 × 10-03	2.80 × 10-01
INTERPRO	Chaperonin Cpn60/TCP-1	RT	3	2.2	4.60 × 10-03	2.80 × 10-01
INTERPRO	Proteasome, subunit alpha/beta	RT	3	2.2	5.30 × 10-03	2.80 × 10-01
INTERPRO	ATPase, AAA-type, conserved site	RT	3	2.2	1.30 × 10-02	4.00 × 10-01
INTERPRO	ATPase, F1 complex beta subunit/V1 complex, C-terminal	RT	2	1.4	1.60 × 10-02	4.00 × 10-01
INTERPRO	Lactate/malate dehydrogenase, N-terminal	RT	2	1.4	1.60 × 10-02	4.00 × 10-01
INTERPRO	L-lactate/malate dehydrogenase	RT	2	1.4	1.60 × 10-02	4.00 × 10-01
INTERPRO	Tubulin, conserved site	RT	3	2.2	1.70 × 10-02	4.00 × 10-01
INTERPRO	Glutathione S-transferase, C-terminal	RT	3	2.2	1.80 × 10-02	4.00 × 10-01
INTERPRO	Glutathione S-transferase, C-terminal-like	RT	3	2.2	2.10 × 10-02	4.00 × 10-01
INTERPRO	Tubulin, C-terminal	RT	3	2.2	2.20 × 10-02	4.00 × 10-01
INTERPRO	Lactate/malate dehydrogenase, C-terminal	RT	2	1.4	2.40 × 10-02	4.00 × 10-01
INTERPRO	Glutathione S-transferase, omega-class	RT	2	1.4	2.40 × 10-02	4.00 × 10-01
INTERPRO	Glucosamine/galactosamine-6-phosphate isomerase	RT	2	1.4	2.40 × 10-02	4.00 × 10-01
INTERPRO	Smooth muscle protein/calponin	RT	2	1.4	2.40 × 10-02	4.00 × 10-01
INTERPRO	Lactate dehydrogenase/glycoside hydrolase, family 4, C-terminal	RT	2	1.4	2.40 × 10-02	4.00 × 10-01
INTERPRO	Glutathione S-transferase, N-terminal	RT	3	2.2	2.50 × 10-02	4.00 × 10-01
INTERPRO	Tubulin/FtsZ, 2-layer sandwich domain	RT	3	2.2	2.50 × 10-02	4.00 × 10-01
INTERPRO	Thioredoxin domain	RT	3	2.2	2.70 × 10-02	4.00 × 10-01
INTERPRO	Tubulin/FtsZ, GTPase domain	RT	3	2.2	2.80 × 10-02	4.00 × 10-01
INTERPRO	Tubulin/FtsZ, C-terminal	RT	3	2.2	3.10 × 10-02	4.00 × 10-01
INTERPRO	Calponin homology domain	RT	3	2.2	3.10 × 10-02	4.00 × 10-01
INTERPRO	ATPase, alpha/beta subunit, nucleotide-binding domain, active site	RT	2	1.4	3.10 × 10-02	4.00 × 10-01
INTERPRO	ATPase, F1/V1/A1 complex, alpha/beta subunit, nucleotide-binding domain	RT	2	1.4	3.10 × 10-02	4.00 × 10-01
INTERPRO	ATPase, alpha/beta subunit, N-terminal	RT	2	1.4	3.10 × 10-02	4.00 × 10-01
INTERPRO	Tubulin	RT	3	2.2	3.80 × 10-02	4.60 × 10-01
INTERPRO	26S proteasome subunit P45	RT	2	1.4	3.90 × 10-02	4.60 × 10-01
INTERPRO	AAA+ ATPase domain	RT	4	2.9	4.00 × 10-02	4.60 × 10-01
INTERPRO	ATPase, AAA-type, core	RT	3	2.2	4.20 × 10-02	4.70 × 10-01
INTERPRO	Peptidase M20, dimerisation domain	RT	2	1.4	4.70 × 10-02	4.80 × 10-01
INTERPRO	Peptidase M20	RT	2	1.4	4.70 × 10-02	4.80 × 10-01
INTERPRO	Proteasome, alpha-subunit, N-terminal domain	RT	2	1.4	4.70 × 10-02	4.80 × 10-01
INTERPRO	Proteasome A-type subunit	RT	2	1.4	5.40 × 10-02	5.20 × 10-01
INTERPRO	Alcohol dehydrogenase GroES-like	RT	2	1.4	5.40 × 10-02	5.20 × 10-01
INTERPRO	SMP-30/Gluconolaconase/LRE-like region	RT	2	1.4	5.40 × 10-02	5.20 × 10-01
INTERPRO	Thioredoxin, conserved site	RT	2	1.4	6.20 × 10-02	5.20 × 10-01
INTERPRO	Alcohol dehydrogenase, C-terminal	RT	2	1.4	6.20 × 10-02	5.20 × 10-01
INTERPRO	Chaperonin TCP-1, conserved site	RT	2	1.4	6.20 × 10-02	5.20 × 10-01
INTERPRO	Chaperone tailless complex polypeptide 1 (TCP-1)	RT	2	1.4	6.20 × 10-02	5.20 × 10-01
INTERPRO	Pyridoxal phosphate-dependent transferase, major region, subdomain 1	RT	3	2.2	6.20 × 10-02	5.20 × 10-01
INTERPRO	Pyridoxal phosphate-dependent transferase	RT	3	2.2	6.40 × 10-02	5.30 × 10-01
INTERPRO	Polyketide synthase, enoylreductase	RT	2	1.4	7.70 × 10-02	6.20 × 10-01
INTERPRO	Glutamine synthetase/guanido kinase, catalytic domain	RT	2	1.4	8.40 × 10-02	6.70 × 10-01
INTERPRO	RmlC-like cupin domain	RT	2	1.4	9.10 × 10-02	7.10 × 10-01

## Sheet: KEGG Pathway analysi by DAVID
	Category	Term	RT	Count	%	P-Value	Benjamini
	KEGG_PATHWAY	Carbon metabolism	RT	21	15.2	2.20 × 10-12	1.50 × 10-10
	KEGG_PATHWAY	Biosynthesis of amino acids	RT	14	10.1	7.70 × 10-09	2.70 × 10-07
	KEGG_PATHWAY	Fructose and mannose metabolism	RT	9	6.5	1.90 × 10-07	4.50 × 10-06
	KEGG_PATHWAY	Glycolysis / Gluconeogenesis	RT	10	7.2	1.10 × 10-06	1.90 × 10-05
	KEGG_PATHWAY	Metabolic pathways	RT	54	39.1	2.50 × 10-06	3.50 × 10-05
	KEGG_PATHWAY	Pentose phosphate pathway	RT	7	5.1	3.60 × 10-05	4.20 × 10-04
	KEGG_PATHWAY	Pyruvate metabolism	RT	7	5.1	3.10 × 10-04	3.10 × 10-03
	KEGG_PATHWAY	Proteasome	RT	7	5.1	6.90 × 10-04	6.00 × 10-03
	KEGG_PATHWAY	Drug metabolism - other enzymes	RT	6	4.3	5.00 × 10-03	3.90 × 10-02
	KEGG_PATHWAY	Citrate cycle (TCA cycle)	RT	5	3.6	9.30 × 10-03	5.90 × 10-02
	KEGG_PATHWAY	Glyoxylate and dicarboxylate metabolism	RT	5	3.6	9.30 × 10-03	5.90 × 10-02
	KEGG_PATHWAY	Biosynthesis of nucleotide sugars	RT	5	3.6	1.10 × 10-02	6.10 × 10-02
	KEGG_PATHWAY	2-Oxocarboxylic acid metabolism	RT	4	2.9	1.40 × 10-02	7.80 × 10-02
	KEGG_PATHWAY	Cysteine and methionine metabolism	RT	5	3.6	2.80 × 10-02	1.40 × 10-01
	KEGG_PATHWAY	Arginine and proline metabolism	RT	5	3.6	3.30 × 10-02	1.50 × 10-01
	KEGG_PATHWAY	beta-Alanine metabolism	RT	4	2.9	3.50 × 10-02	1.50 × 10-01
	KEGG_PATHWAY	Fatty acid degradation	RT	4	2.9	4.70 × 10-02	1.90 × 10-01
	KEGG_PATHWAY	Amino sugar and nucleotide sugar metabolism	RT	6	4.3	5.50 × 10-02	2.10 × 10-01
	KEGG_PATHWAY	Arginine biosynthesis	RT	3	2.2	7.00 × 10-02	2.60 × 10-01
	KEGG_PATHWAY	Pantothenate and CoA biosynthesis	RT	3	2.2	8.70 × 10-02	3.00 × 10-01
	KEGG_PATHWAY	Metabolism of xenobiotics by cytochrome P450	RT	4	2.9	9.80 × 10-02	3.30 × 10-01
