# Supplementary material for: Insights into Common Octopus (Octopus vulgaris) Ink Proteome and Bioactive Peptides Using Proteomic Approaches
Source: Mar Drugs. 2023 Mar 24;21(4):206. doi: 10.3390/md21040206 (PMC10142993; doi:10.3390/md21040206)
Supplement: Supplementary file 1 [file marinedrugs-21-00206-s001.zip › Supplementary File S7.xlsx]

## Sheet: Trypsin Digested Peptides
Trypsin Digested Peptides (Peptide Ranker Values >0.90 and all)
Protein	m/z (mi)	m/z (av)	Start	End	Sequence	Peptide Ranker Values	Peptide Length
>tr|A0A7E6ETN4|A0A7E6ETN4_OCTVU protein-glutamine gamma-glutamyltransferase K OS=Octopus vulgaris OX=6645 GN=LOC115211974 PE=3 SV=1	2565.18	2567.11	367	390	FGQCWVFSGVLTTGIYCCGPCPVK	0.999637	24
>tr|A0A7E6ESL5|A0A7E6ESL5_OCTVU prominin-1-A isoform X4 OS=Octopus vulgaris OX=6645 GN=LOC115210705 PE=3 SV=1	3620.94	3623.73	95	127	IVLYFIGYSICVAIGILFIILIPLIGCCLCCCR	0.999478	33
>Cluster-58773.130155;orf1 len=534 frame:1 start:1 end:1602 gi|871256270|ref|XP_012942267.1| PREDICTED: mucin-3A-like [Aplysia californica]	2704.59	2706.48	398	424	FISSIAGGIGAAVVLIFLIIIVALCCK	0.999199	27
>tr|A0A7E6EW14|A0A7E6EW14_OCTVU Tetraspanin OS=Octopus vulgaris OX=6645 GN=LOC115212017 PE=3 SV=1	2963.59	2965.71	12	36	YLMFAFNFIFWLLGCAILGVGIWIR	0.99917	25
>tr|A0A7E6EHE9|A0A7E6EHE9_OCTVU prosaposin isoform X1 OS=Octopus vulgaris OX=6645 GN=LOC115209891 PE=4 SV=1	2389.24	2390.83	1	23	MSFNSLFLVWLGILGCAFGSTTR	0.999078	23
>tr|A0A6P7SYD8|A0A6P7SYD8_OCTVU neutral protease isoform X1 OS=Octopus vulgaris OX=6645 GN=LOC115217300 PE=3 SV=1	2394.37	2396.02	1	21	MHLSVLLYCWYLLFGSLLLIK	0.998754	21
>tr|A0A7E6EW14|A0A7E6EW14_OCTVU Tetraspanin OS=Octopus vulgaris OX=6645 GN=LOC115212017 PE=3 SV=1	3232.83	3235.09	81	110	SQCLLASFFICLFIIFAILLGAGIFAIISK	0.998242	30
>tr|A0A6P7SJV4|A0A6P7SJV4_OCTVU S-(hydroxymethyl)glutathione dehydrogenase OS=Octopus vulgaris OX=6645 GN=LOC115213890 PE=3 SV=1	1963.96	1965.38	195	215	GSNCAVWGLGAVGLAVAMGCK	0.998195	21
>tr|A0A0L8G0N4|A0A0L8G0N4_OCTBM Prolyl endopeptidase OS=Octopus bimaculoides OX=37653 GN=OCBIM_22003476mg PE=3 SV=1	2609.31	2611.19	3	24	TPLDYLNCIVFIFLCHLQPTCR	0.997642	22
>tr|A0A6P7SVM1|A0A6P7SVM1_OCTVU protein-glucosylgalactosylhydroxylysine glucosidase isoform X2 OS=Octopus vulgaris OX=6645 GN=LOC115216968 PE=4 SV=1	2843.49	2845.37	1	28	MLLVVCLLLLTCLTGQVSATSDSYSSTR	0.99758	28
>tr|A0A6P7S854|A0A6P7S854_OCTVU neuroglian isoform X1 OS=Octopus vulgaris OX=6645 GN=LOC115210201 PE=4 SV=1	2976.83	2978.9	546	570	WIALIVALVLFFIIFILLLCILFNR	0.995036	25
>tr|A0A7E6FQN6|A0A7E6FQN6_OCTVU insulin-like growth factor-binding protein complex acid labile subunit isoform X7 OS=Octopus vulgaris OX=6645 GN=LOC115225305 PE=4 SV=1	2986.35	2988.53	7	34	LTFALILSMSFCLESNAASDICSTCSCR	0.994916	28
>tr|A0A6P7SER3|A0A6P7SER3_OCTVU hemocyanin 1-like OS=Octopus vulgaris OX=6645 GN=LOC115212215 PE=4 SV=2	2729.43	2731.36	2907	2930	IPCLFAIVFAFWLCGYIAEGNLIR	0.994658	24
>Cluster-58773.162319;orf1 len=2921 frame:3 start:24 end:8786 gi|16596797|gb|AAK28276.2| hemocyanin G-type [Enteroctopus dofleini]	2729.43	2731.36	8	31	IPCLFAIVFAFWLCGYIAEGNLIR	0.994658	24
>tr|A0A6P7TPC1|A0A6P7TPC1_OCTVU uncharacterized protein LOC115224175 isoform X1 OS=Octopus vulgaris OX=6645 GN=LOC115224175 PE=4 SV=1	2375.39	2376.9	1	24	MSFGIVLLFVTVVSSLVTAAPLNK	0.993617	24
>tr|A0A6P7SDC4|A0A6P7SDC4_OCTVU hemocyanin G-type, units Oda to Odg OS=Octopus vulgaris OX=6645 GN=LOC115211670 PE=4 SV=2	2703.43	2705.33	4	27	IPCLFAIVFAFWLCGHIAEGNLIR	0.993578	24
>Cluster-58773.104829;orf1 len=394 frame:3 start:15 end:1196 gi|524910869|ref|XP_005110308.1| PREDICTED: calumenin-like isoform X2 [Aplysia californica]	2701.43	2703.28	75	97	YYSFFLTIFLFATTLCSTIPKPK	0.993298	23
>Cluster-58773.193716;orf1 len=468 frame:2 start:29 end:1432 gi|676464997|ref|XP_009057101.1| hypothetical protein LOTGIDRAFT_233221 [Lottia gigantea]>gi|556103524|gb|ESO92176.1| hypothetical protein LOTGIDRAFT_233221 [Lottia gigantea]	2210.07	2211.64	229	249	QSCIGLILGTGCNVCYIENVK	0.992983	21
>tr|A0A6P7SYF5|A0A6P7SYF5_OCTVU retinal dehydrogenase 2 OS=Octopus vulgaris OX=6645 GN=LOC115217865 PE=3 SV=1	3341.56	3343.96	436	466	IMTFTNAIQAGTVWVNTYCCVACQAPFGGFK	0.992039	31
>tr|A0A6P7SAW7|A0A6P7SAW7_OCTVU transketolase OS=Octopus vulgaris OX=6645 GN=LOC115210747 PE=4 SV=1	2258.08	2259.69	364	384	FIECYIAEQNLVGVGIGCACR	0.991698	21
>tr|A0A6P7S7T5|A0A6P7S7T5_OCTVU acid ceramidase-like OS=Octopus vulgaris OX=6645 GN=LOC115209837 PE=3 SV=1	1003.38	1004.18	381	388	CPDPCWPW	0.991404	8
>tr|A0A7E6ESL5|A0A7E6ESL5_OCTVU prominin-1-A isoform X4 OS=Octopus vulgaris OX=6645 GN=LOC115210705 PE=3 SV=1	3207.74	3209.95	150	177	TYVTCLVILNTIILFAVVCTFITNELYK	0.990938	28
>Cluster-58773.132244;orf1 len=954 frame:2 start:176 end:3037 gi|159006|gb|AAA16244.1| peroxidase-like protein, partial [Euprymna scolopes]	3091.81	3093.98	17	44	TTMIRPSLILLLAILPCIVLCLTPLQDK	0.990735	28
>Cluster-58773.132244;orf1 len=954 frame:2 start:176 end:3037 gi|159006|gb|AAA16244.1| peroxidase-like protein, partial [Euprymna scolopes]	3107.8	3109.98	17	44	TTMIRPSLILLLAILPCIVLCLTPLQDK	0.990735	28
>tr|A0A7E6FRZ6|A0A7E6FRZ6_OCTVU hemocyanin G-type, units Oda to Odg-like OS=Octopus vulgaris OX=6645 GN=LOC115225590 PE=4 SV=1	2555.47	2557.18	6	29	SPWLLGATILCIISIFVPVITNGK	0.989103	24
>tr|A0A6P7T914|A0A6P7T914_OCTVU thyroglobulin isoform X2 OS=Octopus vulgaris OX=6645 GN=LOC115220711 PE=4 SV=1	2395.23	2396.9	30	52	YIFFIALSVVAAGAHICSPNACK	0.988906	23
>tr|A0A6P7TD81|A0A6P7TD81_OCTVU dipeptidyl peptidase 2 isoform X1 OS=Octopus vulgaris OX=6645 GN=LOC115222860 PE=3 SV=1	3187.72	3189.66	7	37	ITGLIWVSLLLILSNGPIGSSADGNNGHNVR	0.988758	31
>Cluster-58773.108885;orf1 len=1084 frame:2 start:158 end:3409 gi|667467110|sp|B3EWZ9.1|HEPHL_ACRMI RecName: Full=Hephaestin-like protein; Flags: Precursor [Acropora millepora]	2528.25	2530.07	38	59	NMSHSLWTSFFLCMLGIVSQVK	0.987807	22
>tr|A0A0L8GWF6|A0A0L8GWF6_OCTBM Uncharacterized protein OS=Octopus bimaculoides OX=37653 GN=OCBIM_22027193mg PE=4 SV=1	2637.53	2639.16	3	28	LALVLLVLLPLALSASLGESESETAK	0.987554	26
>tr|A0A6P7SEM8|A0A6P7SEM8_OCTVU Alpha-mannosidase OS=Octopus vulgaris OX=6645 GN=LOC115211875 PE=3 SV=1	3696.77	3699.33	5	37	VFCIFLSFLLVVGNQAYPFHSQSCGYESCNPVK	0.987311	33
>tr|A0A6P7TFQ1|A0A6P7TFQ1_OCTVU Tetraspanin OS=Octopus vulgaris OX=6645 GN=LOC115222869 PE=3 SV=1	2716.54	2718.41	200	226	IAAAGLALAFIQVIGIVFACCLAQAIR	0.984503	27
>tr|Q24925|Q24925_EUPSC Peroxidase-like protein (Fragment) OS=Euprymna scolopes OX=6613 PE=2 SV=1	2533.35	2535.17	1	23	LFLVVLPCLVSCLTPITDDLCQK	0.984059	23
>Cluster-58773.104902;orf1 len=592 frame:3 start:618 end:2393 gi|524870221|ref|XP_005091896.1| PREDICTED: xaa-Pro dipeptidase-like [Aplysia californica]	3334.37	3336.76	358	388	LNDGDACLLDMGTEYCCYASDITCSYPVNGK	0.982857	31
>tr|A0A812DGV9|A0A812DGV9_SEPPH AIFM3 OS=Sepia pharaonis OX=158019 GN=SPHA_53448 PE=4 SV=1	1463.68	1464.8	494	505	SVPFFWSMMFGK	0.980626	12
>tr|A0A7E6EGR4|A0A7E6EGR4_OCTVU short-chain collagen C4-like OS=Octopus vulgaris OX=6645 GN=LOC118760927 PE=4 SV=1	2514.2	2515.93	173	196	DDGGAVLYFVQSVCGSLPCPPYVK	0.978133	24
>tr|Q9BJ58|Q9BJ58_ENTDO Hemocyanin G-type (Fragment) OS=Enteroctopus dofleini OX=267067 PE=4 SV=2	2702.42	2704.23	9	32	ILCLFAFVFAFWLSGQSAEGNLIR	0.977782	24
>tr|A0A6P7T914|A0A6P7T914_OCTVU thyroglobulin isoform X2 OS=Octopus vulgaris OX=6645 GN=LOC115220711 PE=4 SV=1	2748.09	2750.01	141	166	CETDGTFSAVQCHGSVCYCAHTDGTR	0.976203	26
>tr|A0A6P7TDK5|A0A6P7TDK5_OCTVU mucin-5AC-like isoform X1 OS=Octopus vulgaris OX=6645 GN=LOC115222921 PE=4 SV=1	3146.73	3148.74	436	466	SSFDGGSFGGGIAAGIAIAILLLALIYLFYR	0.976129	31
>tr|A0A6P7SE31|A0A6P7SE31_OCTVU 26S proteasome non-ATPase regulatory subunit 2 OS=Octopus vulgaris OX=6645 GN=LOC115211842 PE=3 SV=1	2215.24	2216.77	783	804	SLMSPVAVAGLLSVLISCLDVK	0.975381	22
>Cluster-58773.130155;orf1 len=534 frame:1 start:1 end:1602 gi|871256270|ref|XP_012942267.1| PREDICTED: mucin-3A-like [Aplysia californica]	842.42	842.979	212	217	FEFPFR	0.973591	6
>tr|A0A812CYT6|A0A812CYT6_SEPPH MYH OS=Sepia pharaonis OX=158019 GN=SPHA_42230 PE=3 SV=1	975.458	976.092	801	806	NWQWWR	0.973264	6
>tr|A0A812EMG1|A0A812EMG1_SEPPH DNAH OS=Sepia pharaonis OX=158019 GN=SPHA_78697 PE=4 SV=1	2377.17	2378.85	1207	1231	CYLCLMGALQLDLGGAPAGPAGTGK	0.971438	25
>tr|A0A6P7TFQ1|A0A6P7TFQ1_OCTVU Tetraspanin OS=Octopus vulgaris OX=6645 GN=LOC115222869 PE=3 SV=1	3360.84	3363.2	77	107	EHNVCTMVFAVLLALIFILQLAGGIAAFVMR	0.969205	31
>tr|A0A7E6F1S6|A0A7E6F1S6_OCTVU microtubule-associated protein futsch isoform X4 OS=Octopus vulgaris OX=6645 GN=LOC115215514 PE=4 SV=1	1045.46	1046.2	271	278	ACFWDFTR	0.968121	8
>tr|A0A7E6EUU3|A0A7E6EUU3_OCTVU apoptosis-inducing factor 3 isoform X1 OS=Octopus vulgaris OX=6645 GN=LOC115213836 PE=4 SV=1	1433.64	1434.8	533	544	SVPCFWTMMFGK	0.967302	12
>tr|A0A6P7SWF0|A0A6P7SWF0_OCTVU probable methylmalonate-semialdehyde dehydrogenase [acylating], mitochondrial OS=Octopus vulgaris OX=6645 GN=LOC115217127 PE=3 SV=1	2497.23	2498.96	141	165	GLQVVETCCSLSATCLGETLTGIAK	0.967224	25
>tr|A0A6P7T976|A0A6P7T976_OCTVU H(+)-transporting two-sector ATPase OS=Octopus vulgaris OX=6645 GN=LOC115221352 PE=3 SV=1	804.375	804.992	528	533	FCPFYK	0.966449	6
>tr|A0A6P7SMT0|A0A6P7SMT0_OCTVU dehydrogenase/reductase SDR family member 4 isoform X1 OS=Octopus vulgaris OX=6645 GN=LOC115214531 PE=4 SV=1	825.433	826.054	148	154	APFLFCK	0.965743	7
>tr|A0A6P7TSR4|A0A6P7TSR4_OCTVU Carboxypeptidase OS=Octopus vulgaris OX=6645 GN=LOC115226095 PE=3 SV=1	2240.04	2241.63	228	248	LYANLLSSCCGSNTTVCYISK	0.965007	21
>tr|A0A077B6R8|A0A077B6R8_EUPSC Hemocyanin subunit 1 OS=Euprymna scolopes OX=6613 GN=HCY1 PE=2 SV=1	2996.37	2998.39	2421	2448	VFVGFLLHGFGSSAYATFDICNDAGECR	0.96087	28
>tr|A0A6P7TH79|A0A6P7TH79_OCTVU Ferritin OS=Octopus vulgaris OX=6645 GN=LOC115223217 PE=3 SV=1	921.451	922.078	48	54	GFFEFFK	0.959334	7
>tr|A0A7E6FNE1|A0A7E6FNE1_OCTVU dystrophin isoform X4 OS=Octopus vulgaris OX=6645 GN=LOC115232614 PE=4 SV=1	3095.43	3097.6	224	250	CIIMYIMCLFQVLQNSSNNSSNETNTK	0.95929	27
>Cluster-58773.152800;orf1 len=247 frame:1 start:922 end:1662 gi|762070756|ref|XP_011421184.1| PREDICTED: glutathione S-transferase A-like [Crassostrea gigas]	937.468	938.083	229	235	SWPPHWK	0.957413	7
>Cluster-58773.93343;orf1 len=501 frame:1 start:1 end:1503 gi|762076444|ref|XP_011445523.1| PREDICTED: xylose isomerase-like [Crassostrea gigas] >Cluster-58773.93344;orf1 len=501 frame:1 start:1 end:1503 gi|762076444|ref|XP_011445523.1| PREDICTED: xylose isomerase-like [Crassostrea gigas]	1329.62	1330.56	104	113	FSVCFWHTFR	0.955452	10
>tr|A0A6P7SHI1|A0A6P7SHI1_OCTVU Malate dehydrogenase OS=Octopus vulgaris OX=6645 GN=LOC115212957 PE=3 SV=1	2527.16	2528.84	116	139	DDLFNTNASIVGNLADACAQFCPK	0.953131	24
>tr|A0A7E6EZI8|A0A7E6EZI8_OCTVU uncharacterized protein LOC115214248 OS=Octopus vulgaris OX=6645 GN=LOC115214248 PE=4 SV=1	843.364	844.051	6411	6416	MGWYMR	0.952753	6
>tr|A0A6P7T976|A0A6P7T976_OCTVU H(+)-transporting two-sector ATPase OS=Octopus vulgaris OX=6645 GN=LOC115221352 PE=3 SV=1	2322.16	2323.76	230	253	VLDALFPCVQGGTTAIPGAFGCGK	0.952067	24
>tr|A0A6P7TRC4|A0A6P7TRC4_OCTVU myosin heavy chain, striated muscle OS=Octopus vulgaris OX=6645 GN=LOC115225111 PE=3 SV=2	976.442	977.076	725	730	NWEWWR	0.951523	6
>tr|A0A812DEV9|A0A812DEV9_SEPPH Rab GDP dissociation inhibitor OS=Sepia pharaonis OX=158019 GN=SPHA_54563 PE=3 SV=1	1792.8	1793.99	469	482	DDFSFFFFSFSFPR	0.94971	14
>tr|A0A6P7TQ10|A0A6P7TQ10_OCTVU uncharacterized protein LOC115225177 OS=Octopus vulgaris OX=6645 GN=LOC115225177 PE=4 SV=1	1594.71	1595.89	44	55	FSEQEWLFFCMK	0.949352	12
>tr|A0A6P7TQ10|A0A6P7TQ10_OCTVU uncharacterized protein LOC115225177 OS=Octopus vulgaris OX=6645 GN=LOC115225177 PE=4 SV=1	1610.7	1611.89	44	55	FSEQEWLFFCMK	0.949352	12
>tr|A0A6P7U0P7|A0A6P7U0P7_OCTVU zinc finger ZZ-type and EF-hand domain-containing protein 1 OS=Octopus vulgaris OX=6645 GN=LOC115228010 PE=4 SV=1	976.562	977.202	1001	1008	LFPSLPFR	0.949115	8
>tr|A0A6P7TUI8|A0A6P7TUI8_OCTVU uncharacterized protein LOC115225721 OS=Octopus vulgaris OX=6645 GN=LOC115225721 PE=3 SV=1	1194.53	1195.39	154	162	DWFYMTGFK	0.949111	9
>tr|A0A7E6FE51|A0A7E6FE51_OCTVU filamin-A isoform X1 OS=Octopus vulgaris OX=6645 GN=LOC115220251 PE=3 SV=1	2326.1	2327.7	192	214	AIGALVDACGPGLCPDWADWAPK	0.948884	23
>tr|A0A0L8I420|A0A0L8I420_OCTBM Uncharacterized protein (Fragment) OS=Octopus bimaculoides OX=37653 GN=OCBIM_22037121mg PE=3 SV=1	1272.64	1273.49	196	205	YASNFLWPFK	0.947804	10
>tr|A0A6P7T9I0|A0A6P7T9I0_OCTVU Glyoxalase I OS=Octopus vulgaris OX=6645 GN=LOC115221453 PE=3 SV=1	863.466	864.038	54	60	FDFPPLK	0.946351	7
>Cluster-58773.155745;orf1 len=271 frame:1 start:403 end:1215 gi|443706878|gb|ELU02754.1| hypothetical protein CAPTEDRAFT_117881, partial [Capitella teleta]	2781.35	2783.22	235	260	NENGALLYFVQAVCGSLPCPPYVNGR	0.945612	26
>Cluster-58773.192724;orf1 len=110 frame:1 start:409 end:738 gi|340369254|ref|XP_003383163.1| PREDICTED: thioredoxin-like [Amphimedon queenslandica]	1726.87	1728.14	25	39	LIIIDFFATWCGPCK	0.944114	15
>tr|A0A7E6FHK3|A0A7E6FHK3_OCTVU thioredoxin isoform X2 OS=Octopus vulgaris OX=6645 GN=LOC115222284 PE=4 SV=1	1726.87	1728.14	21	35	LIIIDFFATWCGPCK	0.944114	15
>tr|A0A6P7T046|A0A6P7T046_OCTVU glyoxylate reductase/hydroxypyruvate reductase OS=Octopus vulgaris OX=6645 GN=LOC115218137 PE=3 SV=1	2334.16	2335.71	132	151	NGNWGLWKPMWILGSSFANR	0.942087	20
>tr|A0A6P7U0P7|A0A6P7U0P7_OCTVU zinc finger ZZ-type and EF-hand domain-containing protein 1 OS=Octopus vulgaris OX=6645 GN=LOC115228010 PE=4 SV=1	2069.86	2071.5	1643	1662	CLQCSALDFCASCITGGCFK	0.941639	20
>tr|A0A7E6ESL5|A0A7E6ESL5_OCTVU prominin-1-A isoform X4 OS=Octopus vulgaris OX=6645 GN=LOC115210705 PE=3 SV=1	3665.93	3668.28	8	40	SVAVPCSVLLLWILIAFSLVDHSFAQNSSQQHR	0.941512	33
>Cluster-58773.74875;orf1 len=741 frame:2 start:1832 end:4054 gi|159006|gb|AAA16244.1| peroxidase-like protein, partial [Euprymna scolopes]	1093.52	1094.29	557	565	QWCGLSFPR	0.940111	9
>tr|A0A7E6FFI6|A0A7E6FFI6_OCTVU chorion peroxidase-like OS=Octopus vulgaris OX=6645 GN=LOC115221248 PE=4 SV=1	1076.5	1077.26	449	457	QWCGLSFPR	0.940111	9
>Cluster-141421.4;orf1 len=365 frame:2 start:2 end:1096 gi|470476037|ref|XP_004342217.1| hypothetical protein ACA1_115170 [Acanthamoeba castellanii str. Neff]>gi|440799046|gb|ELR20107.1| hypothetical protein ACA1_115170 [Acanthamoeba castellanii str. Neff]	1620.84	1622.06	246	259	CHFVFLALAPFMPK	0.939609	14
>tr|A0A812CYT6|A0A812CYT6_SEPPH MYH OS=Sepia pharaonis OX=158019 GN=SPHA_42230 PE=3 SV=1	2449.21	2450.88	75	95	YYSGLIYTYSGLFCVVVNPYK	0.939159	21
>Cluster-58773.174510;orf1 len=264 frame:2 start:62 end:853 gi|260829110|ref|XP_002609505.1| hypothetical protein BRAFLDRAFT_127655 [Branchiostoma floridae]>gi|229294862|gb|EEN65515.1| hypothetical protein BRAFLDRAFT_127655 [Branchiostoma floridae]	2932.46	2934.54	39	65	FAIVLCLASVAYGCCAPEYFTAHTLIR	0.939147	27
>tr|A0A7E6FKU8|A0A7E6FKU8_OCTVU 1,2-dihydroxy-3-keto-5-methylthiopentene dioxygenase OS=Octopus vulgaris OX=6645 GN=LOC115223255 PE=3 SV=1	1143.5	1144.36	74	82	FPNFDNMMK	0.934874	9
>tr|A0A6P7TFA3|A0A6P7TFA3_OCTVU Polyol dehydrogenase OS=Octopus vulgaris OX=6645 GN=LOC115223465 PE=3 SV=1	2462.31	2463.98	163	188	AGVGINSTVLISGAGPIGLCCFLTAK	0.934366	26
>tr|A0A7E6ENX1|A0A7E6ENX1_OCTVU spectrin alpha chain isoform X2 OS=Octopus vulgaris OX=6645 GN=LOC115227715 PE=3 SV=1	947.411	948.158	2310	2316	EFSMMFR	0.931708	7
>Cluster-58773.88130;orf1 len=870 frame:3 start:327 end:2936 gi|762145751|ref|XP_011456155.1| PREDICTED: puromycin-sensitive aminopeptidase-like [Crassostrea gigas]	1267.53	1268.4	787	795	DHWQFFCER	0.93076	9
>tr|A0A0L8HU60|A0A0L8HU60_OCTBM Tetratricopeptide repeat protein 38 OS=Octopus bimaculoides OX=37653 GN=OCBIM_22006847mg PE=3 SV=1	2862.27	2864.32	224	246	DWSVCGMLACHNYWHWALYHIEK	0.930471	23
>tr|A0A7E6FDU1|A0A7E6FDU1_OCTVU Glucose-6-phosphate 1-dehydrogenase OS=Octopus vulgaris OX=6645 GN=LOC115220357 PE=3 SV=1	1311.69	1312.63	52	61	IYPTLWCLFR	0.930391	10
>tr|A0A812CC32|A0A812CC32_SEPPH Cilia- and flagella-associated protein 65 OS=Sepia pharaonis OX=158019 GN=SPHA_36641 PE=4 SV=1	1120.59	1121.4	237	245	IDLFHLFCL	0.927866	9
>tr|A0A077B6R8|A0A077B6R8_EUPSC Hemocyanin subunit 1 OS=Euprymna scolopes OX=6613 GN=HCY1 PE=2 SV=1	3161.73	3163.84	4	32	LNHLPLLCLAVILTLWMSGSNTVNGNLVR	0.926117	29
>tr|A0A6P7TUI8|A0A6P7TUI8_OCTVU uncharacterized protein LOC115225721 OS=Octopus vulgaris OX=6645 GN=LOC115225721 PE=3 SV=1	1342.71	1343.58	174	183	LWFDKPPHFR	0.925721	10
>tr|A0A6P7T245|A0A6P7T245_OCTVU trans-1,2-dihydrobenzene-1,2-diol dehydrogenase isoform X1 OS=Octopus vulgaris OX=6645 GN=LOC115218668 PE=4 SV=1	2182.23	2183.66	171	189	SGLIDIGVYLIWLANFIFK	0.925485	19
>tr|A0A6P7T914|A0A6P7T914_OCTVU thyroglobulin isoform X2 OS=Octopus vulgaris OX=6645 GN=LOC115220711 PE=4 SV=1	1161.46	1162.47	70	80	GFCGCCDICIK	0.925073	11
>tr|A0A6P7SVM1|A0A6P7SVM1_OCTVU protein-glucosylgalactosylhydroxylysine glucosidase isoform X2 OS=Octopus vulgaris OX=6645 GN=LOC115216968 PE=4 SV=1	1900.97	1902.41	551	567	QADVILLGFPLMMNMPK	0.922173	17
>Cluster-58773.217011;orf1 len=333 frame:3 start:348 end:1346 gi|762104009|ref|XP_011434531.1| PREDICTED: prostaglandin reductase 1-like [Crassostrea gigas]>gi|405958743|gb|EKC24838.1| Prostaglandin reductase 1 [Crassostrea gigas]	2112.17	2113.43	143	165	SGETVLVNAAAGAVGSIVGQIAK	0.922086	23
>tr|A0A0L8HFB4|A0A0L8HFB4_OCTBM Pacifastin domain-containing protein OS=Octopus bimaculoides OX=37653 GN=OCBIM_22015839mg PE=4 SV=1	1820.71	1822.08	35	52	DDCNLCFCGANGAVSCTK	0.921918	18
>tr|A0A0L8G8E4|A0A0L8G8E4_OCTBM TGc domain-containing protein OS=Octopus bimaculoides OX=37653 GN=OCBIM_22038334mg PE=3 SV=1	1496.76	1497.81	173	184	ESFILLFNPWCK	0.9189	12
>tr|A0A7E6FNE1|A0A7E6FNE1_OCTVU dystrophin isoform X4 OS=Octopus vulgaris OX=6645 GN=LOC115232614 PE=4 SV=1	1786.71	1788.05	3410	3424	CFNFDVCQNCFFSGR	0.918754	15
>Cluster-58773.109972;orf1 len=856 frame:2 start:89 end:2656 gi|762142591|ref|XP_011454520.1| PREDICTED: inter-alpha-trypsin inhibitor heavy chain H3-like [Crassostrea gigas]	2299.2	2300.81	21	41	LLFVMLGAVFYLGMTANGEPR	0.918111	21
>Cluster-58773.93343;orf1 len=501 frame:1 start:1 end:1503 gi|762076444|ref|XP_011445523.1| PREDICTED: xylose isomerase-like [Crassostrea gigas] >Cluster-58773.93344;orf1 len=501 frame:1 start:1 end:1503 gi|762076444|ref|XP_011445523.1| PREDICTED: xylose isomerase-like [Crassostrea gigas]	1150.54	1151.44	53	61	FCCLYIFNK	0.916888	9
>Cluster-58773.136028;orf1 len=262 frame:2 start:116 end:901 gi|291233326|ref|XP_002736601.1| PREDICTED: UPF0462 protein C4orf33 homolog [Saccoglossus kowalevskii]	1265.57	1266.37	219	228	GQFDFPDFHR	0.916554	10
>Cluster-58773.93343;orf1 len=501 frame:1 start:1 end:1503 gi|762076444|ref|XP_011445523.1| PREDICTED: xylose isomerase-like [Crassostrea gigas] >Cluster-58773.93344;orf1 len=501 frame:1 start:1 end:1503 gi|762076444|ref|XP_011445523.1| PREDICTED: xylose isomerase-like [Crassostrea gigas]	1352.67	1353.53	240	251	LGAENFVFWGGR	0.916397	12
>Cluster-58773.88130;orf1 len=870 frame:3 start:327 end:2936 gi|762145751|ref|XP_011456155.1| PREDICTED: puromycin-sensitive aminopeptidase-like [Crassostrea gigas]	1326.58	1327.51	143	153	AFPCWDEPSFK	0.91609	11
>tr|A0A6P7TPC1|A0A6P7TPC1_OCTVU uncharacterized protein LOC115224175 isoform X1 OS=Octopus vulgaris OX=6645 GN=LOC115224175 PE=4 SV=1	1284.64	1285.5	43	52	FSGPWYTIWK	0.915775	10
>tr|A0A7E6FLF6|A0A7E6FLF6_OCTVU leukotriene A-4 hydrolase-like OS=Octopus vulgaris OX=6645 GN=LOC115223638 PE=3 SV=1	848.401	849.045	176	181	MEFFFK	0.915244	6
>tr|A0A6P7U0P7|A0A6P7U0P7_OCTVU zinc finger ZZ-type and EF-hand domain-containing protein 1 OS=Octopus vulgaris OX=6645 GN=LOC115228010 PE=4 SV=1	1412.74	1413.8	703	714	MLPPQPLFNPMK	0.915243	12
>tr|A0A0L8GLX8|A0A0L8GLX8_OCTBM S-formylglutathione hydrolase OS=Octopus bimaculoides OX=37653 GN=OCBIM_22031609mg PE=3 SV=1	1906.89	1908.22	169	186	SVSAFAPICNPVNCNWGK	0.915182	18
>tr|A0A812EMG1|A0A812EMG1_SEPPH DNAH OS=Sepia pharaonis OX=158019 GN=SPHA_78697 PE=4 SV=1	1121.61	1122.36	140	148	IPVFANFWK	0.913394	9
>tr|A0A6P7T656|A0A6P7T656_OCTVU Aconitate hydratase, mitochondrial OS=Octopus vulgaris OX=6645 GN=LOC115219777 PE=3 SV=1	2748.28	2750.16	433	458	LTETLEAIDGCVLANACGPCIGQWDR	0.910547	26
>Cluster-58773.109972;orf1 len=856 frame:2 start:89 end:2656 gi|762142591|ref|XP_011454520.1| PREDICTED: inter-alpha-trypsin inhibitor heavy chain H3-like [Crassostrea gigas]	2562.32	2564.06	681	703	DTLPNIPGIFIKPFSCSNNLCLR	0.910355	23
>tr|Q27Q56|Q27Q56_SEPOF Hemocyanin subunit 2 (Fragment) OS=Sepia officinalis OX=6610 PE=2 SV=1	1260.69	1261.52	1978	1988	VFGGFWLHGIK	0.907156	11
>tr|A0A0L8FXZ4|A0A0L8FXZ4_OCTBM Uncharacterized protein OS=Octopus bimaculoides OX=37653 GN=OCBIM_22004572mg PE=4 SV=1	1524.74	1525.78	229	240	SSLCFLQWTHFR	0.907105	12
>tr|A0A6P7SLL4|A0A6P7SLL4_OCTVU Glutathione S-transferase omega OS=Octopus vulgaris OX=6645 GN=LOC115214295 PE=3 SV=1	1488.71	1489.75	9	20	FLSAWYCPFAQR	0.906935	12
>tr|A0A6P7TG43|A0A6P7TG43_OCTVU GDP-4-keto-6-deoxy-D-mannose-3,5-epimerase-4-reductase OS=Octopus vulgaris OX=6645 GN=LOC115222310 PE=3 SV=1	974.473	975.098	81	87	YNLDFFR	0.906435	7
>tr|W6CNR9|W6CNR9_SEPOF Hemocyanin subunit 3 OS=Sepia officinalis OX=6610 PE=2 SV=1	2456.29	2457.89	7	28	TSFLFLAFVATSWFVYAVTASK	0.905214	22
>tr|Q24925|Q24925_EUPSC Peroxidase-like protein (Fragment) OS=Euprymna scolopes OX=6613 PE=2 SV=1	2982.31	2984.4	864	894	TCLTPATGACSCDGVPAETQIGQCNVFGPAA	0.904898	31
>tr|A0A6P7SQQ6|A0A6P7SQQ6_OCTVU cathepsin L1 OS=Octopus vulgaris OX=6645 GN=LOC115215566 PE=3 SV=1	1109.48	1110.24	299	308	NSWGGSWGMK	0.904726	10
>tr|A0A077B6R8|A0A077B6R8_EUPSC Hemocyanin subunit 1 OS=Euprymna scolopes OX=6613 GN=HCY1 PE=2 SV=1	1229.68	1230.57	757	767	VFAGFLFMGIK	0.904542	11
>tr|A0A7E6FRZ6|A0A7E6FRZ6_OCTVU hemocyanin G-type, units Oda to Odg-like OS=Octopus vulgaris OX=6645 GN=LOC115225590 PE=4 SV=1	926.517	927.204	2007	2014	MFAGFLLK	0.902865	8
>tr|A0A6P7SER3|A0A6P7SER3_OCTVU hemocyanin 1-like OS=Octopus vulgaris OX=6645 GN=LOC115212215 PE=4 SV=2	1953.88	1955.35	5065	5080	YACCLHGMPVFPHWHR	0.90265	16
>tr|A0A6P7SDC4|A0A6P7SDC4_OCTVU hemocyanin G-type, units Oda to Odg OS=Octopus vulgaris OX=6645 GN=LOC115211670 PE=4 SV=2	1953.88	1955.35	2162	2177	YACCLHGMPVFPHWHR	0.90265	16
>Cluster-58773.162319;orf1 len=2921 frame:3 start:24 end:8786 gi|16596797|gb|AAK28276.2| hemocyanin G-type [Enteroctopus dofleini]	1953.88	1955.35	2166	2181	YACCLHGMPVFPHWHR	0.90265	16
>tr|Q9BJ58|Q9BJ58_ENTDO Hemocyanin G-type (Fragment) OS=Enteroctopus dofleini OX=267067 PE=4 SV=2	1953.88	1955.35	2167	2182	YACCLHGMPVFPHWHR	0.90265	16
>sp|O61363|HCYG_ENTDO Hemocyanin G-type, units Oda to Odg OS=Enteroctopus dofleini OX=267067 GN=ODHCY PE=1 SV=1	1953.88	1955.35	2139	2154	YACCLHGMPVFPHWHR	0.90265	16
>tr|A0A6P7U0P7|A0A6P7U0P7_OCTVU zinc finger ZZ-type and EF-hand domain-containing protein 1 OS=Octopus vulgaris OX=6645 GN=LOC115228010 PE=4 SV=1	3370.56	3372.98	1919	1948	MINFLLHQGACNVEYGNTQQACTIACMIQR	0.900661	30
>Cluster-58773.140088;orf1 len=263 frame:2 start:32 end:820 gi|357608316|gb|EHJ65928.1| Ecdysteroid-regulated 16 kDa protein [Danaus plexippus]	1271.5	1272.54	234	245	NDCGCVSCVCLR	0.899331	12
>tr|A0A0L8GMT0|A0A0L8GMT0_OCTBM PKS_ER domain-containing protein OS=Octopus bimaculoides OX=37653 GN=OCBIM_22031489mg PE=4 SV=1	833.419	833.968	280	286	SFFSFAK	0.898789	7
>Cluster-58773.93343;orf1 len=501 frame:1 start:1 end:1503 gi|762076444|ref|XP_011445523.1| PREDICTED: xylose isomerase-like [Crassostrea gigas] >Cluster-58773.93344;orf1 len=501 frame:1 start:1 end:1503 gi|762076444|ref|XP_011445523.1| PREDICTED: xylose isomerase-like [Crassostrea gigas]	1000.42	1001.12	157	163	HWCFHDR	0.898116	7
>tr|A0A6P7SHI1|A0A6P7SHI1_OCTVU Malate dehydrogenase OS=Octopus vulgaris OX=6645 GN=LOC115212957 PE=3 SV=1	2345.21	2346.76	263	284	FAFSLLEALSGVEGIVECAYVK	0.898043	22
>tr|A0A7E6FT44|A0A7E6FT44_OCTVU 4-hydroxyphenylpyruvate dioxygenase OS=Octopus vulgaris OX=6645 GN=LOC115226087 PE=3 SV=1	878.477	879.053	155	162	GPFLPGYK	0.897618	8
>tr|A0A812DGV9|A0A812DGV9_SEPPH AIFM3 OS=Sepia pharaonis OX=158019 GN=SPHA_53448 PE=4 SV=1	1222.55	1223.47	118	128	CPFHGACFNVK	0.89697	11
>tr|A0A6P7TS50|A0A6P7TS50_OCTVU Glutamate--cysteine ligase OS=Octopus vulgaris OX=6645 GN=LOC115225878 PE=3 SV=2	878.488	879.056	599	605	FPQAFIR	0.896911	7
>tr|A0A6P7TD81|A0A6P7TD81_OCTVU dipeptidyl peptidase 2 isoform X1 OS=Octopus vulgaris OX=6645 GN=LOC115222860 PE=3 SV=1	813.371	813.959	1	6	MAFSWR	0.896542	6
>tr|A0A7E6FE51|A0A7E6FE51_OCTVU filamin-A isoform X1 OS=Octopus vulgaris OX=6645 GN=LOC115220251 PE=3 SV=1	1557.72	1558.77	2415	2428	WGDDHIPGSPFCVK	0.89577	14
>tr|A0A0L8IH79|A0A0L8IH79_OCTBM Uncharacterized protein OS=Octopus bimaculoides OX=37653 GN=OCBIM_22005008mg PE=3 SV=1	2342.88	2344.73	550	576	EDPPMPGGGGGMGGMGGMGGMGGMGGF	0.895504	27
>tr|A0A6P7TEG5|A0A6P7TEG5_OCTVU Alpha-L-fucosidase OS=Octopus vulgaris OX=6645 GN=LOC115223232 PE=3 SV=1	2314.19	2315.76	440	459	IDLPNIPISSLPCDWAWVFK	0.895233	20
>tr|A0A6P7SVM2|A0A6P7SVM2_OCTVU Spectrin beta chain OS=Octopus vulgaris OX=6645 GN=LOC115216977 PE=3 SV=1	813.408	814.003	1924	1929	FFNMVR	0.894421	6
>tr|A0A0L8HFB4|A0A0L8HFB4_OCTBM Pacifastin domain-containing protein OS=Octopus bimaculoides OX=37653 GN=OCBIM_22015839mg PE=4 SV=1	1850.68	1852.06	179	196	DDCNSCFCGENGVVGCTK	0.893958	18
>tr|A0A6P7SIX4|A0A6P7SIX4_OCTVU Inorganic diphosphatase OS=Octopus vulgaris OX=6645 GN=LOC115213471 PE=3 SV=2	1051.58	1052.33	13	21	LCFLPGVFR	0.893907	9
>tr|A0A7E6EZI8|A0A7E6EZI8_OCTVU uncharacterized protein LOC115214248 OS=Octopus vulgaris OX=6645 GN=LOC115214248 PE=4 SV=1	927.439	928.104	5591	5597	ECPFYLR	0.890269	7
>tr|A0A6P7T124|A0A6P7T124_OCTVU Cytidine deaminase OS=Octopus vulgaris OX=6645 GN=LOC115218070 PE=3 SV=1	1120.49	1121.27	22	30	AYCPYSNFR	0.889555	9
>sp|Q06331|TBA_ENTDO Tubulin alpha chain OS=Enteroctopus dofleini OX=267067 PE=2 SV=1	1527.73	1528.78	340	352	SIQFVDWCPTGFK	0.887623	13
>tr|A0A0L8HN06|A0A0L8HN06_OCTBM Tubulin alpha chain OS=Octopus bimaculoides OX=37653 GN=OCBIM_22010928mg PE=3 SV=1	1527.73	1528.78	340	352	SIQFVDWCPTGFK	0.887623	13
>Cluster-58773.152500;orf1 len=343 frame:3 start:201 end:1229 gi|762111820|ref|XP_011438633.1| PREDICTED: adenosine deaminase-like [Crassostrea gigas]>gi|762111822|ref|XP_011438634.1| PREDICTED: adenosine deaminase-like [Crassostrea gigas]>gi|762111824|ref|XP_011438635.1| PREDICTED: adenosine deaminase-like [Crassostrea gigas]>gi|762111826|ref|XP_011438636.1| PREDICTED: adenosine deaminase-like […	809.383	810.097	140	146	AILCCMR	0.886771	7
>tr|A0A7E6F497|A0A7E6F497_OCTVU ATP-citrate synthase OS=Octopus vulgaris OX=6645 GN=LOC115216353 PE=3 SV=1	837.404	837.962	527	532	FYWGHK	0.886248	6
>tr|A0A6P7T7W6|A0A6P7T7W6_OCTVU Aspartyl aminopeptidase OS=Octopus vulgaris OX=6645 GN=LOC115220844 PE=3 SV=1	2412.14	2413.73	105	126	QGYLTVGVQCYGGGIWASWLDR	0.883282	22
>tr|A0A6P7TGU1|A0A6P7TGU1_OCTVU actin-interacting protein 1 isoform X1 OS=Octopus vulgaris OX=6645 GN=LOC115223147 PE=4 SV=1	808.377	808.94	156	161	QMNPFR	0.883215	6
>tr|A0A7E6EZ79|A0A7E6EZ79_OCTVU L-threonine ammonia-lyase-like OS=Octopus vulgaris OX=6645 GN=LOC115214389 PE=4 SV=1	806.431	806.948	88	94	AVAWFGR	0.881261	7
>tr|A0A7E6F497|A0A7E6F497_OCTVU ATP-citrate synthase OS=Octopus vulgaris OX=6645 GN=LOC115216353 PE=3 SV=1	1534.71	1535.78	229	241	WGDVMEFPPPFGR	0.88097	13
>tr|A0A6P7SU25|A0A6P7SU25_OCTVU Glucose-6-phosphate isomerase OS=Octopus vulgaris OX=6645 GN=LOC115216343 PE=3 SV=1	1543.68	1544.74	282	293	NMFEFWDWVGGR	0.880857	12
>tr|A0A6P7TK16|A0A6P7TK16_OCTVU Phosphomannomutase OS=Octopus vulgaris OX=6645 GN=LOC115223856 PE=3 SV=1	1155.51	1156.44	128	137	SMMNFCPIGR	0.880848	10
>tr|A0A6P7SYF3|A0A6P7SYF3_OCTVU retinal dehydrogenase 1 OS=Octopus vulgaris OX=6645 GN=LOC115217862 PE=3 SV=1	1483.74	1484.73	113	126	AAFGDIAFSVNCLR	0.880516	14
>tr|A0A6P7TDN6|A0A6P7TDN6_OCTVU 4a-hydroxytetrahydrobiopterin dehydratase OS=Octopus vulgaris OX=6645 GN=LOC115221645 PE=3 SV=1	1364.59	1365.58	86	96	NFNQCFGFMTR	0.87982	11
>tr|A0A7E6EHE9|A0A7E6EHE9_OCTVU prosaposin isoform X1 OS=Octopus vulgaris OX=6645 GN=LOC115209891 PE=4 SV=1	975.406	976.168	729	737	SFPGCYACK	0.87981	9
>tr|A0A6P7U2Q2|A0A6P7U2Q2_OCTVU uncharacterized protein LOC115232460 OS=Octopus vulgaris OX=6645 GN=LOC115232460 PE=4 SV=1	1014.47	1015.12	1	9	MDNFFGTWK	0.877725	9
>Cluster-58773.174510;orf1 len=264 frame:2 start:62 end:853 gi|260829110|ref|XP_002609505.1| hypothetical protein BRAFLDRAFT_127655 [Branchiostoma floridae]>gi|229294862|gb|EEN65515.1| hypothetical protein BRAFLDRAFT_127655 [Branchiostoma floridae]	972.555	973.21	246	253	LLSFAFFK	0.877459	8
>tr|A0A7E6ESL5|A0A7E6ESL5_OCTVU prominin-1-A isoform X4 OS=Octopus vulgaris OX=6645 GN=LOC115210705 PE=3 SV=1	1174.6	1175.51	49	58	GMSFLFIMTK	0.876858	10
>Cluster-58773.104902;orf1 len=592 frame:3 start:618 end:2393 gi|524870221|ref|XP_005091896.1| PREDICTED: xaa-Pro dipeptidase-like [Aplysia californica]	1146.48	1147.26	319	328	HFCSYYGGGR	0.876533	10
>tr|A0A6P7TYN8|A0A6P7TYN8_OCTVU Protein disulfide-isomerase OS=Octopus vulgaris OX=6645 GN=LOC115231769 PE=3 SV=1	1799.8	1801.11	408	422	NVFVEFYAPWCGHCK	0.876221	15
>Cluster-58773.135700;orf1 len=265 frame:3 start:75 end:869 gi|283837550|dbj|BAI66447.1| serine protease 1 [Heterololigo bleekeri]	2731.31	2733.18	62	88	TFLCGGSIMDANHVITAAHCVASGVTR	0.875958	27
>tr|A0A6P7TG88|A0A6P7TG88_OCTVU chymotrypsin B-like OS=Octopus vulgaris OX=6645 GN=LOC115222971 PE=4 SV=1	2731.31	2733.18	60	86	TFLCGGSIMDANHVITAAHCVASGVTR	0.875958	27
>tr|A0A6P7SEM8|A0A6P7SEM8_OCTVU Alpha-mannosidase OS=Octopus vulgaris OX=6645 GN=LOC115211875 PE=3 SV=1	1508.74	1509.82	94	104	FIYVEMAFFWR	0.875061	11
>tr|A0A6P7S7T5|A0A6P7S7T5_OCTVU acid ceramidase-like OS=Octopus vulgaris OX=6645 GN=LOC115209837 PE=3 SV=1	1555.76	1556.83	154	166	NLDFGLFMGWDLK	0.875044	13
>Cluster-58773.156686;orf1 len=474 frame:3 start:477 end:1898 gi|762073747|ref|XP_011435353.1| PREDICTED: serine hydroxymethyltransferase, cytosolic-like [Crassostrea gigas]>gi|405966819|gb|EKC32056.1| Serine hydroxymethyltransferase, cytosolic [Crassostrea gigas]	873.429	874.056	256	262	SGMIFYR	0.874838	7
>tr|A0A6P7S7T5|A0A6P7S7T5_OCTVU acid ceramidase-like OS=Octopus vulgaris OX=6645 GN=LOC115209837 PE=3 SV=1	1557.89	1558.88	225	238	GGFIGIIQWLLGQR	0.874743	14
>tr|A0A0L8GUX3|A0A0L8GUX3_OCTBM Uncharacterized protein OS=Octopus bimaculoides OX=37653 GN=OCBIM_22027429mg PE=3 SV=1	806.423	807.008	387	393	NFMGPLK	0.874587	7
>tr|A0A6P7U2G4|A0A6P7U2G4_OCTVU uncharacterized protein LOC115232424 OS=Octopus vulgaris OX=6645 GN=LOC115232424 PE=4 SV=1	967.471	968.169	116	122	IDWMQFK	0.874403	7
>tr|A0A7E6EZ79|A0A7E6EZ79_OCTVU L-threonine ammonia-lyase-like OS=Octopus vulgaris OX=6645 GN=LOC115214389 PE=4 SV=1	933.468	934.218	243	250	GCMLPVWK	0.874383	8
>tr|A0A0L8FMS3|A0A0L8FMS3_OCTBM VWFC domain-containing protein OS=Octopus bimaculoides OX=37653 GN=OCBIM_22013879mg PE=4 SV=1	2839.35	2841.44	972	998	CVSTCNCTIDGKPVTDPVKPTLCTLCK	0.87349	27
>tr|F0V3W2|F0V3W2_LEPCI Hemocyanin (Fragment) OS=Lepidochitona cinerea OX=256056 PE=2 SV=1	2187.06	2188.53	1175	1193	AGLFFVLGSDLEMPWSFDR	0.873263	19
>Cluster-58773.190283;orf1 len=447 frame:2 start:353 end:1693 gi|617418760|ref|XP_007557771.1| PREDICTED: deoxynucleoside triphosphate triphosphohydrolase SAMHD1-like [Poecilia formosa]	1007.49	1008.13	245	253	DSHFLGFGK	0.873207	9
>tr|A0A6P7SER3|A0A6P7SER3_OCTVU hemocyanin 1-like OS=Octopus vulgaris OX=6645 GN=LOC115212215 PE=4 SV=2	922.551	923.153	2799	2806	VFAGFLLR	0.873199	8
>tr|A0A6P7SDC4|A0A6P7SDC4_OCTVU hemocyanin G-type, units Oda to Odg OS=Octopus vulgaris OX=6645 GN=LOC115211670 PE=4 SV=2	922.551	923.153	2818	2825	VFAGFLLR	0.873199	8
>Cluster-58773.162319;orf1 len=2921 frame:3 start:24 end:8786 gi|16596797|gb|AAK28276.2| hemocyanin G-type [Enteroctopus dofleini]	922.551	923.153	2822	2829	VFAGFLLR	0.873199	8
>tr|Q9BJ58|Q9BJ58_ENTDO Hemocyanin G-type (Fragment) OS=Enteroctopus dofleini OX=267067 PE=4 SV=2	922.551	923.153	2823	2830	VFAGFLLR	0.873199	8
>sp|O61363|HCYG_ENTDO Hemocyanin G-type, units Oda to Odg OS=Enteroctopus dofleini OX=267067 GN=ODHCY PE=1 SV=1	922.551	923.153	2795	2802	VFAGFLLR	0.873199	8
>tr|Q27Q56|Q27Q56_SEPOF Hemocyanin subunit 2 (Fragment) OS=Sepia officinalis OX=6610 PE=2 SV=1	922.551	923.153	3223	3230	VFAGFLLR	0.873199	8
>tr|A0A812CBN1|A0A812CBN1_SEPPH Uncharacterized protein OS=Sepia pharaonis OX=158019 GN=SPHA_33848 PE=4 SV=1	922.551	923.153	2106	2113	VFAGFLLR	0.873199	8
>tr|A0A077B6R8|A0A077B6R8_EUPSC Hemocyanin subunit 1 OS=Euprymna scolopes OX=6613 GN=HCY1 PE=2 SV=1	922.551	923.153	3239	3246	VFAGFLLR	0.873199	8
>tr|W6CNR9|W6CNR9_SEPOF Hemocyanin subunit 3 OS=Sepia officinalis OX=6610 PE=2 SV=1	922.551	923.153	3235	3242	VFAGFLLR	0.873199	8
>tr|A0A812CD65|A0A812CD65_SEPPH Uncharacterized protein OS=Sepia pharaonis OX=158019 GN=SPHA_33819 PE=4 SV=1	922.551	923.153	2825	2832	VFAGFLLR	0.873199	8
>tr|A0A6P7T444|A0A6P7T444_OCTVU transforming growth factor-beta-induced protein ig-h3-like OS=Octopus vulgaris OX=6645 GN=LOC115219504 PE=4 SV=1	1659.8	1661.01	64	77	AFTDMGPFFLNMLR	0.873138	14
>tr|A0A6P7SEM8|A0A6P7SEM8_OCTVU Alpha-mannosidase OS=Octopus vulgaris OX=6645 GN=LOC115211875 PE=3 SV=1	1952.9	1954.29	181	198	EMASLFAGMGFDGLFFGR	0.872054	18
>tr|A0A7E6EZI8|A0A7E6EZI8_OCTVU uncharacterized protein LOC115214248 OS=Octopus vulgaris OX=6645 GN=LOC115214248 PE=4 SV=1	2276.19	2277.6	6417	6437	SAGFSHDLLISALVVLGEYER	0.871813	21
>tr|A0A812EMG1|A0A812EMG1_SEPPH DNAH OS=Sepia pharaonis OX=158019 GN=SPHA_78697 PE=4 SV=1	2184.93	2186.45	1263	1281	FFSGLAQSGAWCCFDEFNR	0.871735	19
>tr|A0A6P7U7W9|A0A6P7U7W9_OCTVU putative aminopeptidase W07G4.4 isoform X1 OS=Octopus vulgaris OX=6645 GN=LOC115232621 PE=3 SV=1	1041.52	1042.25	292	302	CGAAAVAGFFK	0.870756	11
>tr|A0A7E6EY56|A0A7E6EY56_OCTVU Receptor expression-enhancing protein OS=Octopus vulgaris OX=6645 GN=LOC115213373 PE=3 SV=1	2528.11	2530.07	130	151	CGFMLWCMAPIPHNGSDMIYNK	0.870725	22
>tr|A0A7E6EZI8|A0A7E6EZI8_OCTVU uncharacterized protein LOC115214248 OS=Octopus vulgaris OX=6645 GN=LOC115214248 PE=4 SV=1	808.435	808.961	4832	4837	FPEFLR	0.87061	6
>tr|A0A6P7TQ10|A0A6P7TQ10_OCTVU uncharacterized protein LOC115225177 OS=Octopus vulgaris OX=6645 GN=LOC115225177 PE=4 SV=1	2284.99	2286.65	469	489	YTNTPSDMCGRPAGCCKPVER	0.869926	21
>tr|A0A812DBA1|A0A812DBA1_SEPPH RP-S27Ae OS=Sepia pharaonis OX=158019 GN=SPHA_48671 PE=3 SV=1	2084.83	2086.3	120	138	ECPNEECGGGVFMASHFDR	0.86862	19
>tr|A0A7E6F497|A0A7E6F497_OCTVU ATP-citrate synthase OS=Octopus vulgaris OX=6645 GN=LOC115216353 PE=3 SV=1	800.318	800.939	1025	1031	NCGCFTR	0.868555	7
>tr|A0A6P7SER3|A0A6P7SER3_OCTVU hemocyanin 1-like OS=Octopus vulgaris OX=6645 GN=LOC115212215 PE=4 SV=2	1903.84	1905.25	1728	1743	HACCLHGMATFPHWHR	0.868454	16
>tr|A0A6P7SDC4|A0A6P7SDC4_OCTVU hemocyanin G-type, units Oda to Odg OS=Octopus vulgaris OX=6645 GN=LOC115211670 PE=4 SV=2	1903.84	1905.25	1747	1762	HACCLHGMATFPHWHR	0.868454	16
>Cluster-58773.162319;orf1 len=2921 frame:3 start:24 end:8786 gi|16596797|gb|AAK28276.2| hemocyanin G-type [Enteroctopus dofleini]	1903.84	1905.25	1751	1766	HACCLHGMATFPHWHR	0.868454	16
>tr|Q9BJ58|Q9BJ58_ENTDO Hemocyanin G-type (Fragment) OS=Enteroctopus dofleini OX=267067 PE=4 SV=2	1903.84	1905.25	1752	1767	HACCLHGMATFPHWHR	0.868454	16
>sp|O61363|HCYG_ENTDO Hemocyanin G-type, units Oda to Odg OS=Enteroctopus dofleini OX=267067 GN=ODHCY PE=1 SV=1	1903.84	1905.25	1723	1738	HACCLHGMATFPHWHR	0.868454	16
>tr|A0A812DEV9|A0A812DEV9_SEPPH Rab GDP dissociation inhibitor OS=Sepia pharaonis OX=158019 GN=SPHA_54563 PE=3 SV=1	1351.59	1352.59	56	67	FNMGCPPPEFGR	0.868119	12
>tr|A0A812CP82|A0A812CP82_SEPPH Aldehyde dehydrogenase (NAD(+)) OS=Sepia pharaonis OX=158019 GN=SPHA_37438 PE=3 SV=1	2110.14	2111.47	24	42	GRPSSPSLLKPAFIFYSSR	0.86767	19
>Cluster-58773.83035;orf1 len=470 frame:3 start:477 end:1886 gi|554820859|ref|XP_005921157.1| PREDICTED: thymidine phosphorylase-like isoform X1 [Haplochromis burtoni]	1045.51	1046.18	85	92	LSWDPNWK	0.867606	8
>tr|A0A7E6FNE1|A0A7E6FNE1_OCTVU dystrophin isoform X4 OS=Octopus vulgaris OX=6645 GN=LOC115232614 PE=4 SV=1	978.541	979.174	3397	3404	EFPIIGFR	0.867148	8
>tr|A0A6P7S5H1|A0A6P7S5H1_OCTVU Mannose-6-phosphate isomerase OS=Octopus vulgaris OX=6645 GN=LOC115209304 PE=3 SV=1	950.535	951.16	93	100	GELPFLFK	0.86696	8
>tr|A0A6P7SUK9|A0A6P7SUK9_OCTVU Adenosylhomocysteinase OS=Octopus vulgaris OX=6645 GN=LOC115216611 PE=3 SV=1	987.435	988.116	190	197	FDNLYGCR	0.865814	8
>tr|A0A812DRM9|A0A812DRM9_SEPPH Hypothetical protein OS=Sepia pharaonis OX=158019 GN=SPHA_58637 PE=4 SV=1	3039.49	3041.65	168	193	LCVLFCSTHPLLDYVFLFCSTHPLDR	0.86486	26
>tr|F0V3W2|F0V3W2_LEPCI Hemocyanin (Fragment) OS=Lepidochitona cinerea OX=256056 PE=2 SV=1	1650.83	1651.92	1346	1358	LGIPYWDWTQPFK	0.863553	13
>tr|A0A6P7TRC4|A0A6P7TRC4_OCTVU myosin heavy chain, striated muscle OS=Octopus vulgaris OX=6645 GN=LOC115225111 PE=3 SV=2	3109.6	3111.7	1	26	YHLFLSFPIFLQTYSGLFCVAINPYR	0.862389	26
>Cluster-58773.130155;orf1 len=534 frame:1 start:1 end:1602 gi|871256270|ref|XP_012942267.1| PREDICTED: mucin-3A-like [Aplysia californica]	2118.93	2120.4	355	375	NTCLNGGQCFTDSVASASICK	0.861446	21
>Cluster-58773.108885;orf1 len=1084 frame:2 start:158 end:3409 gi|667467110|sp|B3EWZ9.1|HEPHL_ACRMI RecName: Full=Hephaestin-like protein; Flags: Precursor [Acropora millepora]	2063.02	2064.45	981	999	NHAINGFLFGGLQGLDMMK	0.861125	19
>tr|A0A812CD65|A0A812CD65_SEPPH Uncharacterized protein OS=Sepia pharaonis OX=158019 GN=SPHA_33819 PE=4 SV=1	1843.97	1845.16	535	550	GSPIGVPYWDWTKPIK	0.860979	16
>tr|A0A6P7SER3|A0A6P7SER3_OCTVU hemocyanin 1-like OS=Octopus vulgaris OX=6645 GN=LOC115212215 PE=4 SV=2	1241.73	1242.56	2390	2400	VFASFLLFGIK	0.859627	11
>tr|A0A6P7SDC4|A0A6P7SDC4_OCTVU hemocyanin G-type, units Oda to Odg OS=Octopus vulgaris OX=6645 GN=LOC115211670 PE=4 SV=2	1241.73	1242.56	2409	2419	VFASFLLFGIK	0.859627	11
>Cluster-58773.162319;orf1 len=2921 frame:3 start:24 end:8786 gi|16596797|gb|AAK28276.2| hemocyanin G-type [Enteroctopus dofleini]	1241.73	1242.56	2413	2423	VFASFLLFGIK	0.859627	11
>tr|Q9BJ58|Q9BJ58_ENTDO Hemocyanin G-type (Fragment) OS=Enteroctopus dofleini OX=267067 PE=4 SV=2	1241.73	1242.56	2414	2424	VFASFLLFGIK	0.859627	11
>sp|O61363|HCYG_ENTDO Hemocyanin G-type, units Oda to Odg OS=Enteroctopus dofleini OX=267067 GN=ODHCY PE=1 SV=1	1241.73	1242.56	2386	2396	VFASFLLFGIK	0.859627	11
>tr|A0A6P7T402|A0A6P7T402_OCTVU uncharacterized HIT-like protein Synpcc7942_1390 OS=Octopus vulgaris OX=6645 GN=LOC115219148 PE=4 SV=1	815.339	815.928	122	128	QMTWPPG	0.859391	7
>tr|A0A6P7SVM1|A0A6P7SVM1_OCTVU protein-glucosylgalactosylhydroxylysine glucosidase isoform X2 OS=Octopus vulgaris OX=6645 GN=LOC115216968 PE=4 SV=1	1923.03	1924.44	753	769	SCAMLLIVSFVFPFHLV	0.858113	17
>tr|A0A7E6EUU3|A0A7E6EUU3_OCTVU apoptosis-inducing factor 3 isoform X1 OS=Octopus vulgaris OX=6645 GN=LOC115213836 PE=4 SV=1	1795.8	1797.04	138	154	CSHYGLPLANGAYCNGR	0.857932	17
>tr|A0A7E6EUU3|A0A7E6EUU3_OCTVU apoptosis-inducing factor 3 isoform X1 OS=Octopus vulgaris OX=6645 GN=LOC115213836 PE=4 SV=1	1223.53	1224.45	157	167	CPFHGACFDVK	0.857142	11
>Cluster-58773.162759;orf1 len=276 frame:2 start:2 end:829 gi|524875728|ref|XP_005094588.1| PREDICTED: uncharacterized protein LOC101847027 isoform X1 [Aplysia californica]>gi|524875730|ref|XP_005094589.1| PREDICTED: uncharacterized protein LOC101847027 isoform X1 [Aplysia californica]	1942.01	1943.27	7	23	SYPAPWTFSTNLAVFLK	0.857081	17
>tr|Q27Q56|Q27Q56_SEPOF Hemocyanin subunit 2 (Fragment) OS=Sepia officinalis OX=6610 PE=2 SV=1	1185.61	1186.36	1382	1391	IEPNPFFHGK	0.856762	10
>tr|A0A7E6F497|A0A7E6F497_OCTVU ATP-citrate synthase OS=Octopus vulgaris OX=6645 GN=LOC115216353 PE=3 SV=1	1832.98	1834.27	603	621	SVCIIGPATVGGVKPGCFK	0.856639	19
>tr|A0A6P7S7T5|A0A6P7S7T5_OCTVU acid ceramidase-like OS=Octopus vulgaris OX=6645 GN=LOC115209837 PE=3 SV=1	896.462	897.028	242	248	WSSFLTR	0.856489	7
>tr|Q27Q56|Q27Q56_SEPOF Hemocyanin subunit 2 (Fragment) OS=Sepia officinalis OX=6610 PE=2 SV=1	2229	2230.55	3251	3270	FGGTFCVLGGQHEMAWAFDR	0.856424	20
>tr|Q27Q56|Q27Q56_SEPOF Hemocyanin subunit 2 (Fragment) OS=Sepia officinalis OX=6610 PE=2 SV=1	2245	2246.55	3251	3270	FGGTFCVLGGQHEMAWAFDR	0.856424	20
>tr|A0A6P7T046|A0A6P7T046_OCTVU glyoxylate reductase/hydroxypyruvate reductase OS=Octopus vulgaris OX=6645 GN=LOC115218137 PE=3 SV=1	2370.09	2371.78	204	224	DSDVICICCNLTPATHYLFNK	0.856419	21
>Cluster-58773.148525;orf1 len=812 frame:2 start:422 end:2857 gi|676447145|ref|XP_009051312.1| hypothetical protein LOTGIDRAFT_201834 [Lottia gigantea]>gi|556109335|gb|ESO97987.1| hypothetical protein LOTGIDRAFT_201834 [Lottia gigantea]	1165.51	1166.31	433	441	DFHDMFPTR	0.856275	9
>tr|A0A6P7TWP3|A0A6P7TWP3_OCTVU chymotrypsin-like protease CTRL-1 OS=Octopus vulgaris OX=6645 GN=LOC115226866 PE=4 SV=2	1594.69	1595.76	135	151	LASSPCNGDSGGSLACR	0.855732	17
>tr|A0A0L8G8E4|A0A0L8G8E4_OCTBM TGc domain-containing protein OS=Octopus bimaculoides OX=37653 GN=OCBIM_22038334mg PE=3 SV=1	1874.93	1876.26	307	322	YGQCWVFSGLMTTLLR	0.855629	16
>tr|A0A812CG60|A0A812CG60_SEPPH ARF1_2 OS=Sepia pharaonis OX=158019 GN=SPHA_38611 PE=3 SV=1	840.52	841.053	118	123	IRPLWR	0.855051	6
>tr|A0A6P7TGA0|A0A6P7TGA0_OCTVU Isocitrate dehydrogenase [NADP] OS=Octopus vulgaris OX=6645 GN=LOC115223822 PE=3 SV=1	1057.48	1058.21	298	307	SSGGFVWSCK	0.854899	10
>tr|A0A6P7SKR8|A0A6P7SKR8_OCTVU Vesicle-fusing ATPase OS=Octopus vulgaris OX=6645 GN=LOC115213827 PE=4 SV=1 >tr|A0A0L8GAT1|A0A0L8GAT1_OCTBM Vesicle-fusing ATPase OS=Octopus bimaculoides OX=37653 GN=OCBIM_22037045mg PE=4 SV=1	1194.6	1195.43	510	521	GVLFYGPPGCGK	0.854353	12
>tr|A0A6P7TEC1|A0A6P7TEC1_OCTVU spermidine synthase OS=Octopus vulgaris OX=6645 GN=LOC115222533 PE=3 SV=1	1663.68	1664.93	10	23	EECDLWSGYSMCLK	0.85367	14
>Cluster-58773.147322;orf1 len=499 frame:3 start:3 end:1499 gi|676461383|ref|XP_009055926.1| hypothetical protein LOTGIDRAFT_161773 [Lottia gigantea]>gi|556104570|gb|ESO93222.1| hypothetical protein LOTGIDRAFT_161773 [Lottia gigantea]	1124.59	1125.32	155	163	AEIPWFPHK	0.853407	9
>tr|A0A0L8H1Z7|A0A0L8H1Z7_OCTBM CN hydrolase domain-containing protein OS=Octopus bimaculoides OX=37653 GN=OCBIM_22024094mg PE=4 SV=1	2807.32	2809.39	105	129	AASLCGVNILCLQEAWYMPFAFCTR	0.852689	25
>tr|A0A6P7SIX4|A0A6P7SIX4_OCTVU Inorganic diphosphatase OS=Octopus vulgaris OX=6645 GN=LOC115213471 PE=3 SV=2	1883.84	1885.15	101	116	IHSGSSICHWWCTPNR	0.852385	16
>tr|W6CNR9|W6CNR9_SEPOF Hemocyanin subunit 3 OS=Sepia officinalis OX=6610 PE=2 SV=1	954.548	955.258	2417	2424	MFVGFLLK	0.852293	8
>tr|F0V3W2|F0V3W2_LEPCI Hemocyanin (Fragment) OS=Lepidochitona cinerea OX=256056 PE=2 SV=1	1905.81	1907.22	65	80	FSCCVHGMSTFAHWHR	0.852286	16
>tr|A0A6P7TEC1|A0A6P7TEC1_OCTVU spermidine synthase OS=Octopus vulgaris OX=6645 GN=LOC115222533 PE=3 SV=1	1018.51	1019.15	1	9	MPLENGWFR	0.851976	9
>tr|A0A7E6FRZ6|A0A7E6FRZ6_OCTVU hemocyanin G-type, units Oda to Odg-like OS=Octopus vulgaris OX=6645 GN=LOC115225590 PE=4 SV=1	2113.97	2115.53	1335	1351	VYTCCLHGMPNFLHWHR	0.851964	17
>tr|A0A0L8GMT0|A0A0L8GMT0_OCTBM PKS_ER domain-containing protein OS=Octopus bimaculoides OX=37653 GN=OCBIM_22031489mg PE=4 SV=1	2221.21	2222.63	173	195	AGQSVLAHCIAGGVGQAIIQLSK	0.851593	23
>tr|A0A7E6EZI8|A0A7E6EZI8_OCTVU uncharacterized protein LOC115214248 OS=Octopus vulgaris OX=6645 GN=LOC115214248 PE=4 SV=1	1030.6	1031.25	5879	5888	GGILSPFALR	0.851307	10
>tr|A0A6P7U4P1|A0A6P7U4P1_OCTVU deoxynucleoside triphosphate triphosphohydrolase SAMHD1-like isoform X2 OS=Octopus vulgaris OX=6645 GN=LOC115231345 PE=4 SV=1	1242.52	1243.39	234	242	NFYDMFYSR	0.851257	9
>tr|A0A0L8G0N4|A0A0L8G0N4_OCTBM Prolyl endopeptidase OS=Octopus bimaculoides OX=37653 GN=OCBIM_22003476mg PE=3 SV=1	803.351	803.92	209	214	GMFYNR	0.850605	6
>tr|A0A6P7T245|A0A6P7T245_OCTVU trans-1,2-dihydrobenzene-1,2-diol dehydrogenase isoform X1 OS=Octopus vulgaris OX=6645 GN=LOC115218668 PE=4 SV=1	800.434	800.982	126	131	FFPVYK	0.850321	6
>tr|A0A812BQ89|A0A812BQ89_SEPPH Transaldolase OS=Sepia pharaonis OX=158019 GN=SPHA_21947 PE=3 SV=1	3609.78	3612.26	33	65	HGIHCNMTLLFNFYQAISCAEAGVTLISPFVGR	0.849973	33
>tr|A0A6P7SU25|A0A6P7SU25_OCTVU Glucose-6-phosphate isomerase OS=Octopus vulgaris OX=6645 GN=LOC115216343 PE=3 SV=1	925.424	926.088	232	238	WFLDNCK	0.849903	7
>tr|A0A6P7SCB7|A0A6P7SCB7_OCTVU gelsolin-like protein 2 OS=Octopus vulgaris OX=6645 GN=LOC115211599 PE=4 SV=1	1425.69	1426.63	89	99	FNYDVHFWIGK	0.848702	11
>tr|A0A6P7TEG5|A0A6P7TEG5_OCTVU Alpha-L-fucosidase OS=Octopus vulgaris OX=6645 GN=LOC115223232 PE=3 SV=1	831.378	831.912	296	301	YSWGYR	0.848553	6
>tr|A0A6P7STJ4|A0A6P7STJ4_OCTVU Carboxylic ester hydrolase OS=Octopus vulgaris OX=6645 GN=LOC115216415 PE=3 SV=1	2671.2	2673.08	278	300	VMLDCFLNADANNISMGQYYNFK	0.84846	23
>tr|A0A6P7SCL7|A0A6P7SCL7_OCTVU cylicin-1 OS=Octopus vulgaris OX=6645 GN=LOC115211645 PE=4 SV=1	833.415	833.925	102	108	APDDFIR	0.848425	7
>tr|A0A7E6EHE9|A0A7E6EHE9_OCTVU prosaposin isoform X1 OS=Octopus vulgaris OX=6645 GN=LOC115209891 PE=4 SV=1	1554.73	1555.87	218	231	EVCPYLGPFEGICK	0.84826	14
>tr|Q27Q56|Q27Q56_SEPOF Hemocyanin subunit 2 (Fragment) OS=Sepia officinalis OX=6610 PE=2 SV=1	1865.85	1867.24	487	502	VACCIHGMATFPHWHR	0.847966	16
>tr|Q27Q56|Q27Q56_SEPOF Hemocyanin subunit 2 (Fragment) OS=Sepia officinalis OX=6610 PE=2 SV=1	1881.85	1883.24	487	502	VACCIHGMATFPHWHR	0.847966	16
>tr|A0A7E6FAL0|A0A7E6FAL0_OCTVU protein hu-li tai shao isoform X12 OS=Octopus vulgaris OX=6645 GN=LOC115218883 PE=3 SV=1	973.369	974.174	351	358	MMDNCGFR	0.84786	8
>tr|A0A7E6FRZ6|A0A7E6FRZ6_OCTVU hemocyanin G-type, units Oda to Odg-like OS=Octopus vulgaris OX=6645 GN=LOC115225590 PE=4 SV=1	1155.66	1156.42	756	766	VFAGFLFGGIK	0.847475	11
>tr|A0A0L8HS70|A0A0L8HS70_OCTBM XPGN domain-containing protein OS=Octopus bimaculoides OX=37653 GN=OCBIM_22007405mg PE=3 SV=1	1761.98	1763.07	46	61	SGNPIPNAHLIVLFNR	0.845709	16
>tr|A0A812CP82|A0A812CP82_SEPPH Aldehyde dehydrogenase (NAD(+)) OS=Sepia pharaonis OX=158019 GN=SPHA_37438 PE=3 SV=1	1422.74	1423.75	10	23	VSGCLCTASSLLLR	0.844775	14
>tr|A0A812BJI2|A0A812BJI2_SEPPH Non-specific serine/threonine protein kinase OS=Sepia pharaonis OX=158019 GN=SPHA_16686 PE=4 SV=1	1115.6	1116.44	163	173	IPSAAIGPMMK	0.844736	11
>tr|A0A6P7T124|A0A6P7T124_OCTVU Cytidine deaminase OS=Octopus vulgaris OX=6645 GN=LOC115218070 PE=3 SV=1	832.417	833.069	88	95	IAPCGICR	0.844671	8
>Cluster-58773.83035;orf1 len=470 frame:3 start:477 end:1886 gi|554820859|ref|XP_005921157.1| PREDICTED: thymidine phosphorylase-like isoform X1 [Haplochromis burtoni]	1457.82	1458.88	108	122	ISLVLAPALAACGMK	0.844342	15
>tr|A0A7E6EZI8|A0A7E6EZI8_OCTVU uncharacterized protein LOC115214248 OS=Octopus vulgaris OX=6645 GN=LOC115214248 PE=4 SV=1	1113.63	1114.34	2506	2515	SPDALLAWLK	0.842828	10
>tr|A0A0L8HJQ8|A0A0L8HJQ8_OCTBM Peptidase M20 domain-containing protein 2 OS=Octopus bimaculoides OX=37653 GN=OCBIM_22013224mg PE=3 SV=1	3031.45	3033.44	187	215	ASHASSAPWNGVNALDAAVLCYQNISCLR	0.842821	29
>tr|A0A6P7TM22|A0A6P7TM22_OCTVU Tetratricopeptide repeat protein 38 OS=Octopus vulgaris OX=6645 GN=LOC115223987 PE=3 SV=1	815.384	815.912	1	6	MYYQWR	0.842261	6
>tr|A0A6P7TRF4|A0A6P7TRF4_OCTVU catalase OS=Octopus vulgaris OX=6645 GN=LOC115228352 PE=3 SV=1	1020.51	1021.17	291	298	WNPFDLTK	0.839615	8
>tr|A0A6P7TRV9|A0A6P7TRV9_OCTVU Ubiquitin-activating enzyme E1 OS=Octopus vulgaris OX=6645 GN=LOC115225288 PE=3 SV=1	1017.47	1018.12	655	662	DQFEGFFK	0.838766	8
>tr|A0A6P7SL43|A0A6P7SL43_OCTVU Glucosamine-6-phosphate isomerase OS=Octopus vulgaris OX=6645 GN=LOC115214100 PE=3 SV=1	2085.89	2087.29	80	95	DHPESYHSFMWNNFFK	0.837375	16
>tr|A0A0L8IDH2|A0A0L8IDH2_OCTBM Non-specific serine/threonine protein kinase OS=Octopus bimaculoides OX=37653 GN=OCBIM_22020713mg PE=3 SV=1	2484.23	2485.77	1	24	MVSSFIEGWDLVQTLGEGAYGEVK	0.836561	24
>tr|A0A6P7SH66|A0A6P7SH66_OCTVU alpha-actinin, sarcomeric isoform X3 OS=Octopus vulgaris OX=6645 GN=LOC115212896 PE=4 SV=1	1321.6	1322.49	396	407	AAPFNNWMDGAK	0.836169	12
>tr|A0A6P7TD81|A0A6P7TD81_OCTVU dipeptidyl peptidase 2 isoform X1 OS=Octopus vulgaris OX=6645 GN=LOC115222860 PE=3 SV=1	888.457	889.005	123	130	SLPFGPDR	0.836127	8
>tr|A0A6P7SJV4|A0A6P7SJV4_OCTVU S-(hydroxymethyl)glutathione dehydrogenase OS=Octopus vulgaris OX=6645 GN=LOC115213890 PE=3 SV=1	2211.11	2212.61	172	194	VCLLGCGISTGYGAALNTAAVEK	0.835935	23
>tr|A0A6P7SYN9|A0A6P7SYN9_OCTVU barrier-to-autointegration factor B OS=Octopus vulgaris OX=6645 GN=LOC115217368 PE=4 SV=1	842.354	843.017	76	82	DCFNCLK	0.835922	7
>tr|A0A0L8GW99|A0A0L8GW99_OCTBM Uncharacterized protein OS=Octopus bimaculoides OX=37653 GN=OCBIM_22026800mg PE=3 SV=1	2154.08	2155.62	102	122	GCATCGVIMSVNNSLYLAPIK	0.835742	21
>tr|A0A0L8ICE8|A0A0L8ICE8_OCTBM Calponin-homology (CH) domain-containing protein OS=Octopus bimaculoides OX=37653 GN=OCBIM_22019394mg PE=4 SV=1	2144.13	2145.55	128	147	GPFLNVINCLHSLGFLANSK	0.835559	20
>tr|W6CNR9|W6CNR9_SEPOF Hemocyanin subunit 3 OS=Sepia officinalis OX=6610 PE=2 SV=1	1890.83	1892.25	2164	2179	FACCVHGMATFPQWHR	0.83553	16
>tr|A0A0L8HU60|A0A0L8HU60_OCTBM Tetratricopeptide repeat protein 38 OS=Octopus bimaculoides OX=37653 GN=OCBIM_22006847mg PE=3 SV=1	2986.26	2988.32	11	37	MFDATLCQYVGWCEDDSVGGFEGSLEK	0.835245	27
>tr|A0A7E6EW14|A0A7E6EW14_OCTVU Tetraspanin OS=Octopus vulgaris OX=6645 GN=LOC115212017 PE=3 SV=1	1000.44	1001.15	175	182	DFYDIPCK	0.834891	8
>tr|A0A0L8IDH2|A0A0L8IDH2_OCTBM Non-specific serine/threonine protein kinase OS=Octopus bimaculoides OX=37653 GN=OCBIM_22020713mg PE=3 SV=1	847.41	847.955	107	112	AQYYFR	0.834634	6
>tr|F0V3W2|F0V3W2_LEPCI Hemocyanin (Fragment) OS=Lepidochitona cinerea OX=256056 PE=2 SV=1	957.515	958.112	1386	1393	DPVPNLFR	0.833749	8
>tr|Q9BJ58|Q9BJ58_ENTDO Hemocyanin G-type (Fragment) OS=Enteroctopus dofleini OX=267067 PE=4 SV=2	1828.86	1830.08	1199	1214	AGEFYILGSANEMPWK	0.833209	16
>sp|O61363|HCYG_ENTDO Hemocyanin G-type, units Oda to Odg OS=Enteroctopus dofleini OX=267067 GN=ODHCY PE=1 SV=1	1812.86	1814.08	1170	1185	AGEFYILGSANEMPWK	0.833209	16
>tr|A0A6P7SVS2|A0A6P7SVS2_OCTVU UV excision repair protein RAD23 OS=Octopus vulgaris OX=6645 GN=LOC115216665 PE=3 SV=1	1977.89	1979.36	420	437	ALGFPEGMCIQAYFACEK	0.83277	18
>tr|A0A0L8FMS3|A0A0L8FMS3_OCTBM VWFC domain-containing protein OS=Octopus bimaculoides OX=37653 GN=OCBIM_22013879mg PE=4 SV=1	3195.31	3197.57	942	971	TCISHNHSCNVETCSPGCACPENTLFQDGK	0.832655	30
>tr|A0A6P7TFA3|A0A6P7TFA3_OCTVU Polyol dehydrogenase OS=Octopus vulgaris OX=6645 GN=LOC115223465 PE=3 SV=1	1367.55	1368.59	127	137	FYCHAADFCYK	0.830774	11
>tr|A0A6P7TEC1|A0A6P7TEC1_OCTVU spermidine synthase OS=Octopus vulgaris OX=6645 GN=LOC115222533 PE=3 SV=1	3269.53	3271.91	213	243	AVFPCVSYANCTLATYACGQIGLVLCSNTMR	0.830312	31
>tr|A0A6P7SLL4|A0A6P7SLL4_OCTVU Glutathione S-transferase omega OS=Octopus vulgaris OX=6645 GN=LOC115214295 PE=3 SV=1	1234.76	1235.57	107	116	IIPLFYSILR	0.829244	10
>tr|A0A0L8GSS4|A0A0L8GSS4_OCTBM AAA domain-containing protein OS=Octopus bimaculoides OX=37653 GN=OCBIM_22029167mg PE=3 SV=1 >tr|A0A6P7SHR1|A0A6P7SHR1_OCTVU 26S proteasome regulatory subunit 6B OS=Octopus vulgaris OX=6645 GN=LOC115213143 PE=3 SV=1	1162.57	1163.45	201	212	GVLMFGPPGCGK	0.828688	12
>Cluster-58773.163293;orf1 len=95 frame:3 start:567 end:851 gi|871243797|ref|XP_012940045.1| PREDICTED: uncharacterized protein LOC101860584 [Aplysia californica]	1072.5	1073.33	1	10	IAFPGCYACK	0.828538	10
>Cluster-58773.132244;orf1 len=954 frame:2 start:176 end:3037 gi|159006|gb|AAA16244.1| peroxidase-like protein, partial [Euprymna scolopes]	1382.75	1383.66	489	502	SLATPPLSCALGPR	0.82834	14
>tr|A0A812CD65|A0A812CD65_SEPPH Uncharacterized protein OS=Sepia pharaonis OX=158019 GN=SPHA_33819 PE=4 SV=1	1955.86	1957.33	2169	2184	YACCLHGMPTFPHWHR	0.827387	16
>tr|A0A7E6FNE1|A0A7E6FNE1_OCTVU dystrophin isoform X4 OS=Octopus vulgaris OX=6645 GN=LOC115232614 PE=4 SV=1	2752.37	2754.07	2894	2917	MLISQQPVGGDLQLVQQQNEENQR	0.825542	24
>tr|A0A6P7SE31|A0A6P7SE31_OCTVU 26S proteasome non-ATPase regulatory subunit 2 OS=Octopus vulgaris OX=6645 GN=LOC115211842 PE=3 SV=1	1105.55	1106.3	752	760	DPNNLFMVR	0.825401	9
>tr|A0A6P7SQT5|A0A6P7SQT5_OCTVU cathepsin L1-like OS=Octopus vulgaris OX=6645 GN=LOC115215560 PE=3 SV=1	3416.73	3419.02	5	35	SLVAVLLFVACAASVPLSDNFLDQSWQTYMK	0.825043	31
>tr|A0A7E6FRZ6|A0A7E6FRZ6_OCTVU hemocyanin G-type, units Oda to Odg-like OS=Octopus vulgaris OX=6645 GN=LOC115225590 PE=4 SV=1	1407.73	1408.61	814	826	ALGVDPFGDFTLR	0.824637	13
>tr|A0A7E6FUS0|A0A7E6FUS0_OCTVU Annexin OS=Octopus vulgaris OX=6645 GN=LOC115226900 PE=3 SV=1	1073.54	1074.23	114	122	SLPGYFAYR	0.823941	9
>Cluster-58773.104829;orf1 len=394 frame:3 start:15 end:1196 gi|524910869|ref|XP_005110308.1| PREDICTED: calumenin-like isoform X2 [Aplysia californica]	2583.44	2585.19	4	26	GILVPIASLFNCLFYFSPLLSIR	0.823268	23
>Cluster-58773.148525;orf1 len=812 frame:2 start:422 end:2857 gi|676447145|ref|XP_009051312.1| hypothetical protein LOTGIDRAFT_201834 [Lottia gigantea]>gi|556109335|gb|ESO97987.1| hypothetical protein LOTGIDRAFT_201834 [Lottia gigantea]	1109.57	1110.27	487	495	FIGDQNFLR	0.823072	9
>tr|A0A6P7U2G4|A0A6P7U2G4_OCTVU uncharacterized protein LOC115232424 OS=Octopus vulgaris OX=6645 GN=LOC115232424 PE=4 SV=1	1385.6	1386.53	22	34	LDDSPDFAAFCGK	0.822182	13
>tr|A0A0L8GLX8|A0A0L8GLX8_OCTBM S-formylglutathione hydrolase OS=Octopus bimaculoides OX=37653 GN=OCBIM_22031609mg PE=3 SV=1	894.508	895.096	33	40	FGIYLPGK	0.821023	8
>tr|W6CNR9|W6CNR9_SEPOF Hemocyanin subunit 3 OS=Sepia officinalis OX=6610 PE=2 SV=1	1931.89	1933.23	260	276	ANCGLNLFHEPMEPFGR	0.82097	17
>tr|A0A812CD65|A0A812CD65_SEPPH Uncharacterized protein OS=Sepia pharaonis OX=158019 GN=SPHA_33819 PE=4 SV=1	1931.89	1933.23	262	278	ANCGLNLFHEPMEPFGR	0.82097	17
>tr|A0A6P7SZ60|A0A6P7SZ60_OCTVU aldehyde dehydrogenase, mitochondrial OS=Octopus vulgaris OX=6645 GN=LOC115217872 PE=3 SV=1	3731.65	3734.29	294	328	SPNIVFADANMDLAVETCHLGLFFNQGQCCCAGSR	0.820856	35
>tr|A0A6P7SE31|A0A6P7SE31_OCTVU 26S proteasome non-ATPase regulatory subunit 2 OS=Octopus vulgaris OX=6645 GN=LOC115211842 PE=3 SV=1	813.473	813.984	671	677	AFGHLLR	0.820312	7
>tr|F0V3W2|F0V3W2_LEPCI Hemocyanin (Fragment) OS=Lepidochitona cinerea OX=256056 PE=2 SV=1	1051.47	1052.2	775	782	EMPWAFDR	0.819821	8
>tr|A0A812EMG1|A0A812EMG1_SEPPH DNAH OS=Sepia pharaonis OX=158019 GN=SPHA_78697 PE=4 SV=1	802.355	802.933	1308	1313	FMFEGR	0.819648	6
>tr|A0A6P7S5H1|A0A6P7S5H1_OCTVU Mannose-6-phosphate isomerase OS=Octopus vulgaris OX=6645 GN=LOC115209304 PE=3 SV=1	1100.47	1101.36	198	206	NAFEAMMMR	0.819282	9
>tr|A0A812CBN1|A0A812CBN1_SEPPH Uncharacterized protein OS=Sepia pharaonis OX=158019 GN=SPHA_33848 PE=4 SV=1	803.466	803.983	135	141	APIDFLK	0.818415	7
>Cluster-58773.152800;orf1 len=247 frame:1 start:922 end:1662 gi|762070756|ref|XP_011421184.1| PREDICTED: glutathione S-transferase A-like [Crassostrea gigas]	2189.98	2191.57	21	39	SMMSDITLYWGSGSIPCWR	0.818142	19
>tr|A0A7E6FE51|A0A7E6FE51_OCTVU filamin-A isoform X1 OS=Octopus vulgaris OX=6645 GN=LOC115220251 PE=3 SV=1	3774.96	3777.51	130	164	LILGLIWTLILHYSISMPMWEGEEPAPGAGGPTPK	0.818101	35
>tr|A0A6P7T0X7|A0A6P7T0X7_OCTVU ganglioside GM2 activator OS=Octopus vulgaris OX=6645 GN=LOC115218607 PE=4 SV=1	1962.09	1963.47	3	20	LLLLSCLVGFCLADNVLR	0.817441	18
>Cluster-58773.150174;orf1 len=107 frame:1 start:838 end:1158 gi|524881845|ref|XP_005097572.1| PREDICTED: ganglioside GM2 activator-like [Aplysia californica]>gi|524881847|ref|XP_005097573.1| PREDICTED: ganglioside GM2 activator-like [Aplysia californica]	1962.09	1963.47	8	25	LLLLSCLVGFCLADNVLR	0.817441	18
>tr|Q27Q56|Q27Q56_SEPOF Hemocyanin subunit 2 (Fragment) OS=Sepia officinalis OX=6610 PE=2 SV=1	1920.85	1922.28	2151	2166	YACCLHGMATFPQWHR	0.817404	16
>tr|A0A7E6FRZ6|A0A7E6FRZ6_OCTVU hemocyanin G-type, units Oda to Odg-like OS=Octopus vulgaris OX=6645 GN=LOC115225590 PE=4 SV=1	1920.85	1922.28	1754	1769	YACCLHGMATFPQWHR	0.817404	16
>tr|A0A6P7TYN8|A0A6P7TYN8_OCTVU Protein disulfide-isomerase OS=Octopus vulgaris OX=6645 GN=LOC115231769 PE=3 SV=1	1846.81	1848.23	69	83	YLMVEFYAPWCGHCK	0.816654	15
>Cluster-58773.193716;orf1 len=468 frame:2 start:29 end:1432 gi|676464997|ref|XP_009057101.1| hypothetical protein LOTGIDRAFT_233221 [Lottia gigantea]>gi|556103524|gb|ESO92176.1| hypothetical protein LOTGIDRAFT_233221 [Lottia gigantea]	1684.81	1686.01	127	141	GPSLQVFEFMADCIK	0.816282	15
>Cluster-58773.155745;orf1 len=271 frame:1 start:403 end:1215 gi|443706878|gb|ELU02754.1| hypothetical protein CAPTEDRAFT_117881, partial [Capitella teleta]	2757.59	2759.33	28	52	YSISSLIAFGVLLVLTIVILHQDSR	0.816247	25
>tr|A0A077B6R8|A0A077B6R8_EUPSC Hemocyanin subunit 1 OS=Euprymna scolopes OX=6613 GN=HCY1 PE=2 SV=1	1894.84	1896.24	2168	2183	HACCLHGMATFPQWHR	0.816199	16
>tr|A0A812CD65|A0A812CD65_SEPPH Uncharacterized protein OS=Sepia pharaonis OX=158019 GN=SPHA_33819 PE=4 SV=1	2007.93	2009.4	1753	1769	LHACCLHGMATFPQWHR	0.816199	17
>Cluster-58773.74875;orf1 len=741 frame:2 start:1832 end:4054 gi|159006|gb|AAA16244.1| peroxidase-like protein, partial [Euprymna scolopes]	851.408	852.006	274	280	DCLPFTR	0.815334	7
>tr|A0A7E6FFI6|A0A7E6FFI6_OCTVU chorion peroxidase-like OS=Octopus vulgaris OX=6645 GN=LOC115221248 PE=4 SV=1	851.408	852.006	146	152	DCLPFTR	0.815334	7
>tr|A0A812CD65|A0A812CD65_SEPPH Uncharacterized protein OS=Sepia pharaonis OX=158019 GN=SPHA_33819 PE=4 SV=1	1215.72	1216.52	2416	2426	IFAGFLLHGIK	0.814712	11
>tr|A0A6P7TRV9|A0A6P7TRV9_OCTVU Ubiquitin-activating enzyme E1 OS=Octopus vulgaris OX=6645 GN=LOC115225288 PE=3 SV=1	2289.26	2290.91	897	918	IIPAIATTTSLIVGLVCLEMCK	0.813253	22
>tr|A0A6P7U0P7|A0A6P7U0P7_OCTVU zinc finger ZZ-type and EF-hand domain-containing protein 1 OS=Octopus vulgaris OX=6645 GN=LOC115228010 PE=4 SV=1	1839.73	1841.17	1695	1710	VQCAECSYHVCFGCYK	0.813064	16
>tr|A0A7E6FRZ6|A0A7E6FRZ6_OCTVU hemocyanin G-type, units Oda to Odg-like OS=Octopus vulgaris OX=6645 GN=LOC115225590 PE=4 SV=1	1113.58	1114.36	2852	2862	FAGTFCILGGK	0.812803	11
>tr|A0A6P7SU25|A0A6P7SU25_OCTVU Glucose-6-phosphate isomerase OS=Octopus vulgaris OX=6645 GN=LOC115216343 PE=3 SV=1	970.477	971.13	239	247	QPSCNILGR	0.811817	9
>tr|A0A0L8HFB4|A0A0L8HFB4_OCTBM Pacifastin domain-containing protein OS=Octopus bimaculoides OX=37653 GN=OCBIM_22015839mg PE=4 SV=1	1356.62	1357.67	135	147	CFCGVNGIIACTR	0.811766	13
>Cluster-58773.190283;orf1 len=447 frame:2 start:353 end:1693 gi|617418760|ref|XP_007557771.1| PREDICTED: deoxynucleoside triphosphate triphosphohydrolase SAMHD1-like [Poecilia formosa]	1557.65	1558.79	277	288	CLDNFYDMFYAR	0.811117	12
>tr|A0A6P7T8U5|A0A6P7T8U5_OCTVU uncharacterized protein LOC115221216 OS=Octopus vulgaris OX=6645 GN=LOC115221216 PE=4 SV=1	1855.06	1856.34	49	65	FFLAILLVACAQAFSIK	0.810922	17
>Cluster-58773.162111;orf1 len=288 frame:1 start:1 end:864 gi|675369805|gb|KFM62707.1| Laminin subunit alpha-2, partial [Stegodyphus mimosarum]	1855.06	1856.34	12	28	FFLAILLVACAQAFSIK	0.810922	17
>tr|A0A6P7T4Z8|A0A6P7T4Z8_OCTVU opine dehydrogenase OS=Octopus vulgaris OX=6645 GN=LOC115219799 PE=4 SV=1	1057.51	1058.19	324	331	FVPDFNYR	0.810503	8
>tr|A0A6P7U2G4|A0A6P7U2G4_OCTVU uncharacterized protein LOC115232424 OS=Octopus vulgaris OX=6645 GN=LOC115232424 PE=4 SV=1	902.357	903.136	420	426	CFMQDMK	0.81	7
>tr|A0A812CBN1|A0A812CBN1_SEPPH Uncharacterized protein OS=Sepia pharaonis OX=158019 GN=SPHA_33848 PE=4 SV=1	1823.8	1825.16	64	79	VACCAHGMATFPHWHR	0.809967	16
>tr|W6CNR9|W6CNR9_SEPOF Hemocyanin subunit 3 OS=Sepia officinalis OX=6610 PE=2 SV=1	1823.8	1825.16	504	519	VACCAHGMATFPHWHR	0.809967	16
>tr|A0A7E6FUS0|A0A7E6FUS0_OCTVU Annexin OS=Octopus vulgaris OX=6645 GN=LOC115226900 PE=3 SV=1	1014.48	1015.19	62	69	FNNIFCTR	0.809291	8
>tr|A0A7E6FD92|A0A7E6FD92_OCTVU insulin-degrading enzyme OS=Octopus vulgaris OX=6645 GN=LOC115219912 PE=3 SV=1	2130.05	2131.54	63	81	DLPGLAHFCEHMLFLGTTK	0.809288	19
>tr|A0A7E6F1S6|A0A7E6F1S6_OCTVU microtubule-associated protein futsch isoform X4 OS=Octopus vulgaris OX=6645 GN=LOC115215514 PE=4 SV=1	936.462	937.121	1674	1680	HWMGLHR	0.809271	7
>tr|A0A7E6FRZ6|A0A7E6FRZ6_OCTVU hemocyanin G-type, units Oda to Odg-like OS=Octopus vulgaris OX=6645 GN=LOC115225590 PE=4 SV=1	1507.76	1508.73	1365	1377	GSSVAVPYWDWLK	0.808962	13
>tr|A0A812DRM9|A0A812DRM9_SEPPH Hypothetical protein OS=Sepia pharaonis OX=158019 GN=SPHA_58637 PE=4 SV=1	1455.71	1456.78	477	488	QIMCSLLFNTFR	0.807928	12
>tr|A0A6P7SYF3|A0A6P7SYF3_OCTVU retinal dehydrogenase 1 OS=Octopus vulgaris OX=6645 GN=LOC115217862 PE=3 SV=1	820.374	820.888	69	74	WGSEWR	0.807867	6
>tr|A0A7E6EZ79|A0A7E6EZ79_OCTVU L-threonine ammonia-lyase-like OS=Octopus vulgaris OX=6645 GN=LOC115214389 PE=4 SV=1	816.371	816.96	62	68	NAFCSFK	0.806685	7
>Cluster-58773.147322;orf1 len=499 frame:3 start:3 end:1499 gi|676461383|ref|XP_009055926.1| hypothetical protein LOTGIDRAFT_161773 [Lottia gigantea]>gi|556104570|gb|ESO93222.1| hypothetical protein LOTGIDRAFT_161773 [Lottia gigantea]	1808.85	1810.16	360	374	LATCYWFTVEFGLCR	0.80636	15
>tr|A0A6P7UAQ3|A0A6P7UAQ3_OCTVU 14 kDa fatty acid-binding protein OS=Octopus vulgaris OX=6645 GN=LOC115232340 PE=4 SV=1	881.455	882.076	1	7	MSIDLFR	0.805572	7
>tr|A0A6P7T914|A0A6P7T914_OCTVU thyroglobulin isoform X2 OS=Octopus vulgaris OX=6645 GN=LOC115220711 PE=4 SV=1	1902.86	1904.18	84	101	EGDPCFLGDMFGSLVTSK	0.80477	18
>Cluster-58773.187542;orf1 len=244 frame:-2 start:928 end:197 gi|524865670|ref|XP_005089662.1| PREDICTED: uncharacterized protein LOC101849508 [Aplysia californica]	2033.97	2035.36	156	174	DGCYLCEPLVLHEGSSLAK	0.804673	19
>tr|A0A7E6FRZ6|A0A7E6FRZ6_OCTVU hemocyanin G-type, units Oda to Odg-like OS=Octopus vulgaris OX=6645 GN=LOC115225590 PE=4 SV=1	1895.83	1897.23	504	519	IACCEHGMATFPHWHR	0.80458	16
>tr|A0A6P7SB76|A0A6P7SB76_OCTVU epidermal retinol dehydrogenase 2 isoform X1 OS=Octopus vulgaris OX=6645 GN=LOC115210961 PE=3 SV=1	1082.57	1083.35	28	37	AILPGCFYAK	0.804387	10
>tr|A0A6P7SER3|A0A6P7SER3_OCTVU hemocyanin 1-like OS=Octopus vulgaris OX=6645 GN=LOC115212215 PE=4 SV=2	1798.85	1800.06	1175	1190	AGEFYVLGSANEMPWK	0.80437	16
>tr|A0A6P7SDC4|A0A6P7SDC4_OCTVU hemocyanin G-type, units Oda to Odg OS=Octopus vulgaris OX=6645 GN=LOC115211670 PE=4 SV=2	1814.84	1816.05	1194	1209	AGEFYVLGSANEMPWK	0.80437	16
>Cluster-58773.162319;orf1 len=2921 frame:3 start:24 end:8786 gi|16596797|gb|AAK28276.2| hemocyanin G-type [Enteroctopus dofleini]	1798.85	1800.06	1198	1213	AGEFYVLGSANEMPWK	0.80437	16
>tr|A0A0L8FTG9|A0A0L8FTG9_OCTBM Amine oxidase OS=Octopus bimaculoides OX=37653 GN=OCBIM_22008553mg PE=3 SV=1	1010.53	1011.17	163	170	DFAELFLR	0.80427	8
>tr|A0A6P7SYD8|A0A6P7SYD8_OCTVU neutral protease isoform X1 OS=Octopus vulgaris OX=6645 GN=LOC115217300 PE=3 SV=1	1253.63	1254.44	540	549	NPVFDFVYPR	0.80379	10
>tr|A0A6P7SA56|A0A6P7SA56_OCTVU cathepsin B OS=Octopus vulgaris OX=6645 GN=LOC115210644 PE=3 SV=1	2013.78	2015.18	108	127	DQGNCGSCWAAAAAEAMSDR	0.803429	20
>tr|A0A0L8GMT0|A0A0L8GMT0_OCTBM PKS_ER domain-containing protein OS=Octopus bimaculoides OX=37653 GN=OCBIM_22031489mg PE=4 SV=1	1319.71	1320.61	70	81	ACGVNFLDLVLR	0.803087	12
>tr|A0A6P7SBT2|A0A6P7SBT2_OCTVU Hydroxyacid-oxoacid transhydrogenase OS=Octopus vulgaris OX=6645 GN=LOC115210878 PE=3 SV=1	2073.89	2075.29	132	151	QDNFDAFLAIGGGSTMDTCK	0.803023	20
>tr|A0A7E6FRZ6|A0A7E6FRZ6_OCTVU hemocyanin G-type, units Oda to Odg-like OS=Octopus vulgaris OX=6645 GN=LOC115225590 PE=4 SV=1	1186.65	1187.39	1001	1011	APSADLFLQPK	0.802585	11
>Cluster-58773.197059;orf1 len=509 frame:1 start:352 end:1878 gi|260816652|ref|XP_002603202.1| hypothetical protein BRAFLDRAFT_281736 [Branchiostoma floridae]>gi|229288519|gb|EEN59213.1| hypothetical protein BRAFLDRAFT_281736 [Branchiostoma floridae]	1402.68	1403.61	271	283	ADESKPPVFGPCR	0.801885	13
>tr|A0A6P7TMY2|A0A6P7TMY2_OCTVU Fumarylacetoacetase OS=Octopus vulgaris OX=6645 GN=LOC115226547 PE=3 SV=2	1402.68	1403.61	204	216	ADESKPPVFGPCR	0.801885	13
>tr|A0A6P7SDM4|A0A6P7SDM4_OCTVU lysosomal aspartic protease isoform X2 OS=Octopus vulgaris OX=6645 GN=LOC115211653 PE=3 SV=1	2148.09	2149.67	3	21	SLLFLTICMAFATCHALHR	0.801159	19
>sp|Q06331|TBA_ENTDO Tubulin alpha chain OS=Enteroctopus dofleini OX=267067 PE=2 SV=1	1153.47	1154.49	312	320	YMACCMLYR	0.800113	9
>tr|A0A0L8HN06|A0A0L8HN06_OCTBM Tubulin alpha chain OS=Octopus bimaculoides OX=37653 GN=OCBIM_22010928mg PE=3 SV=1	1153.47	1154.49	312	320	YMACCMLYR	0.800113	9
>tr|A0A6P7SER3|A0A6P7SER3_OCTVU hemocyanin 1-like OS=Octopus vulgaris OX=6645 GN=LOC115212215 PE=4 SV=2	1953.82	1955.27	895	910	YACCHHGMATFPHWHR	0.799969	16
>tr|A0A6P7SDC4|A0A6P7SDC4_OCTVU hemocyanin G-type, units Oda to Odg OS=Octopus vulgaris OX=6645 GN=LOC115211670 PE=4 SV=2	1953.82	1955.27	914	929	YACCHHGMATFPHWHR	0.799969	16
>Cluster-58773.162319;orf1 len=2921 frame:3 start:24 end:8786 gi|16596797|gb|AAK28276.2| hemocyanin G-type [Enteroctopus dofleini]	1953.82	1955.27	918	933	YACCHHGMATFPHWHR	0.799969	16
>tr|Q9BJ58|Q9BJ58_ENTDO Hemocyanin G-type (Fragment) OS=Enteroctopus dofleini OX=267067 PE=4 SV=2	1953.82	1955.27	919	934	YACCHHGMATFPHWHR	0.799969	16
>sp|O61363|HCYG_ENTDO Hemocyanin G-type, units Oda to Odg OS=Enteroctopus dofleini OX=267067 GN=ODHCY PE=1 SV=1	1953.82	1955.27	890	905	YACCHHGMATFPHWHR	0.799969	16
>tr|Q27Q56|Q27Q56_SEPOF Hemocyanin subunit 2 (Fragment) OS=Sepia officinalis OX=6610 PE=2 SV=1	1953.82	1955.27	902	917	YACCHHGMATFPHWHR	0.799969	16
>tr|A0A077B6R8|A0A077B6R8_EUPSC Hemocyanin subunit 1 OS=Euprymna scolopes OX=6613 GN=HCY1 PE=2 SV=1	1953.82	1955.27	920	935	YACCHHGMATFPHWHR	0.799969	16
>tr|A0A7E6FRZ6|A0A7E6FRZ6_OCTVU hemocyanin G-type, units Oda to Odg-like OS=Octopus vulgaris OX=6645 GN=LOC115225590 PE=4 SV=1	1953.82	1955.27	919	934	YACCHHGMATFPHWHR	0.799969	16
>tr|A0A7E6FDU1|A0A7E6FDU1_OCTVU Glucose-6-phosphate 1-dehydrogenase OS=Octopus vulgaris OX=6645 GN=LOC115220357 PE=3 SV=1	801.498	802.013	353	359	GVPFILR	0.799852	7
>tr|A0A6P7TSR4|A0A6P7TSR4_OCTVU Carboxypeptidase OS=Octopus vulgaris OX=6645 GN=LOC115226095 PE=3 SV=1	893.488	894.068	300	306	NFPQFIK	0.799819	7
>tr|A0A0L8FU30|A0A0L8FU30_OCTBM Uncharacterized protein OS=Octopus bimaculoides OX=37653 GN=OCBIM_22007941mg PE=4 SV=1	891.461	892.049	1	8	MSYAYLFK	0.799784	8
>tr|A0A6P7TYN8|A0A6P7TYN8_OCTVU Protein disulfide-isomerase OS=Octopus vulgaris OX=6645 GN=LOC115231769 PE=3 SV=1	2158.16	2159.61	28	47	SSLIVFVALFCFSQALEGVK	0.799622	20
>tr|A0A6P7SAF9|A0A6P7SAF9_OCTVU Proteasome subunit alpha type OS=Octopus vulgaris OX=6645 GN=LOC115210708 PE=3 SV=1	915.414	916.053	225	231	NFNMFSR	0.798585	7
>tr|A0A6P7TAQ3|A0A6P7TAQ3_OCTVU von Willebrand factor C domain-containing protein 2-like OS=Octopus vulgaris OX=6645 GN=LOC115222123 PE=4 SV=1	3049.2	3051.42	94	120	LNCVDFEDVEDECCPICPNGENCYTPK	0.797177	27
>tr|A0A6P7U0P7|A0A6P7U0P7_OCTVU zinc finger ZZ-type and EF-hand domain-containing protein 1 OS=Octopus vulgaris OX=6645 GN=LOC115228010 PE=4 SV=1	1835.11	1836.35	1027	1041	CLLLQHFKPILLQLR	0.796021	15
>Cluster-58773.148525;orf1 len=812 frame:2 start:422 end:2857 gi|676447145|ref|XP_009051312.1| hypothetical protein LOTGIDRAFT_201834 [Lottia gigantea]>gi|556109335|gb|ESO97987.1| hypothetical protein LOTGIDRAFT_201834 [Lottia gigantea]	890.473	891.021	211	218	APNSFNLK	0.795953	8
>tr|A0A7E6FRZ6|A0A7E6FRZ6_OCTVU hemocyanin G-type, units Oda to Odg-like OS=Octopus vulgaris OX=6645 GN=LOC115225590 PE=4 SV=1	1025.49	1026.17	495	503	CPRPDAPNR	0.795789	9
>Cluster-58773.197059;orf1 len=509 frame:1 start:352 end:1878 gi|260816652|ref|XP_002603202.1| hypothetical protein BRAFLDRAFT_281736 [Branchiostoma floridae]>gi|229288519|gb|EEN59213.1| hypothetical protein BRAFLDRAFT_281736 [Branchiostoma floridae]	1022.45	1023.27	411	417	YMYWTMK	0.795423	7
>tr|A0A6P7TMY2|A0A6P7TMY2_OCTVU Fumarylacetoacetase OS=Octopus vulgaris OX=6645 GN=LOC115226547 PE=3 SV=2	1022.45	1023.27	344	350	YMYWTMK	0.795423	7
>tr|A0A7E6FRZ6|A0A7E6FRZ6_OCTVU hemocyanin G-type, units Oda to Odg-like OS=Octopus vulgaris OX=6645 GN=LOC115225590 PE=4 SV=1	820.446	820.975	1631	1636	FTHLFR	0.79465	6
>tr|A0A6P7SEM8|A0A6P7SEM8_OCTVU Alpha-mannosidase OS=Octopus vulgaris OX=6645 GN=LOC115211875 PE=3 SV=1	1368.74	1369.79	270	280	LILFSTWVMMK	0.794627	11
>tr|A0A6P7S5H1|A0A6P7S5H1_OCTVU Mannose-6-phosphate isomerase OS=Octopus vulgaris OX=6645 GN=LOC115209304 PE=3 SV=1	1104.54	1105.31	1	11	MADDPCVFPLK	0.793895	11
>tr|A0A812CBN1|A0A812CBN1_SEPPH Uncharacterized protein OS=Sepia pharaonis OX=158019 GN=SPHA_33848 PE=4 SV=1	1944.82	1946.26	478	493	YACCQHGMATFPHWHR	0.793409	16
>tr|W6CNR9|W6CNR9_SEPOF Hemocyanin subunit 3 OS=Sepia officinalis OX=6610 PE=2 SV=1	1944.82	1946.26	918	933	YACCQHGMATFPHWHR	0.793409	16
>tr|A0A812CD65|A0A812CD65_SEPPH Uncharacterized protein OS=Sepia pharaonis OX=158019 GN=SPHA_33819 PE=4 SV=1	1944.82	1946.26	920	935	YACCQHGMATFPHWHR	0.793409	16
>tr|A0A7E6FRZ6|A0A7E6FRZ6_OCTVU hemocyanin G-type, units Oda to Odg-like OS=Octopus vulgaris OX=6645 GN=LOC115225590 PE=4 SV=1	1944.82	1946.26	2169	2184	YACCQHGMATFPHWHR	0.793409	16
>tr|A0A6P7TQA6|A0A6P7TQA6_OCTVU Parkinson disease protein 7 homolog OS=Octopus vulgaris OX=6645 GN=LOC115224773 PE=4 SV=1	1420.78	1421.69	154	167	GPGTAFEFALAIVK	0.793115	14
>Cluster-58773.197059;orf1 len=509 frame:1 start:352 end:1878 gi|260816652|ref|XP_002603202.1| hypothetical protein BRAFLDRAFT_281736 [Branchiostoma floridae]>gi|229288519|gb|EEN59213.1| hypothetical protein BRAFLDRAFT_281736 [Branchiostoma floridae]	1419.77	1420.7	332	343	WEYVPLGPFLAK	0.792469	12
>tr|A0A6P7TMY2|A0A6P7TMY2_OCTVU Fumarylacetoacetase OS=Octopus vulgaris OX=6645 GN=LOC115226547 PE=3 SV=2	1419.77	1420.7	265	276	WEYVPLGPFLAK	0.792469	12
>tr|A0A6P7TRV9|A0A6P7TRV9_OCTVU Ubiquitin-activating enzyme E1 OS=Octopus vulgaris OX=6645 GN=LOC115225288 PE=3 SV=1	3562.72	3565.08	198	231	GLFGQIFCDFGSGFVVADVDGEQPITNMVASITK	0.79215	34
>tr|A0A7E6EY74|A0A7E6EY74_OCTVU twitchin OS=Octopus vulgaris OX=6645 GN=LOC115213975 PE=3 SV=1	1307.66	1308.49	4430	4440	DIPPSFTFDLR	0.791371	11
>tr|A0A0S1U346|A0A0S1U346_AMPFA Triosephosphate isomerase OS=Amphioctopus fangsiao OX=515817 PE=2 SV=1 >tr|A0A6P7SZ67|A0A6P7SZ67_OCTVU Triosephosphate isomerase OS=Octopus vulgaris OX=6645 GN=LOC115218066 PE=3 SV=1	954.483	955.111	5	12	FFVGGNWK	0.791277	8
>tr|A0A0L8GMT0|A0A0L8GMT0_OCTBM PKS_ER domain-containing protein OS=Octopus bimaculoides OX=37653 GN=OCBIM_22031489mg PE=4 SV=1	1071.63	1072.37	255	264	GISLLKPMGR	0.791205	10
>tr|A0A812CBN1|A0A812CBN1_SEPPH Uncharacterized protein OS=Sepia pharaonis OX=158019 GN=SPHA_33848 PE=4 SV=1	1993.93	1995.28	1339	1355	HGASVGVPYWDWTYPMK	0.790958	17
>tr|A0A812CBN1|A0A812CBN1_SEPPH Uncharacterized protein OS=Sepia pharaonis OX=158019 GN=SPHA_33848 PE=4 SV=1	2911.24	2913.44	1716	1740	MCPTPEAPEYACCLHGMPTFPHWHR	0.790874	25
>tr|W6CNR9|W6CNR9_SEPOF Hemocyanin subunit 3 OS=Sepia officinalis OX=6610 PE=2 SV=1	2911.24	2913.44	2569	2593	MCPTPEAPEYACCLHGMPTFPHWHR	0.790874	25
>tr|A0A6P7SZ60|A0A6P7SZ60_OCTVU aldehyde dehydrogenase, mitochondrial OS=Octopus vulgaris OX=6645 GN=LOC115217872 PE=3 SV=1	2331.11	2332.66	469	490	AGTVWVNCFDVLDTAAPFGGYK	0.789317	22
>Cluster-58773.147322;orf1 len=499 frame:3 start:3 end:1499 gi|676461383|ref|XP_009055926.1| hypothetical protein LOTGIDRAFT_161773 [Lottia gigantea]>gi|556104570|gb|ESO93222.1| hypothetical protein LOTGIDRAFT_161773 [Lottia gigantea]	1086.5	1087.25	272	280	FLQDCTGFR	0.788913	9
>tr|A0A0L8FTG9|A0A0L8FTG9_OCTBM Amine oxidase OS=Octopus bimaculoides OX=37653 GN=OCBIM_22008553mg PE=3 SV=1	1884.04	1885.18	1	22	MSSAPVDVIVVGGGLSGLSAAK	0.788851	22
>tr|A0A6P7SHI1|A0A6P7SHI1_OCTVU Malate dehydrogenase OS=Octopus vulgaris OX=6645 GN=LOC115212957 PE=3 SV=1	1809.07	1810.27	32	50	VCVLGAAGGIGQPLSLLLK	0.788672	19
>tr|A0A6P7UBL9|A0A6P7UBL9_OCTVU fatty-acid amide hydrolase 2 isoform X2 OS=Octopus vulgaris OX=6645 GN=LOC115232529 PE=3 SV=1	2704.36	2706.02	199	229	IAGGSSGGEGCLIGSGASIIGVGSDIGGSIR	0.788616	31
>tr|A0A7E6F497|A0A7E6F497_OCTVU ATP-citrate synthase OS=Octopus vulgaris OX=6645 GN=LOC115216353 PE=3 SV=1	1802.98	1804.11	851	866	EDLGIGGVLSLLWFQR	0.787787	16
>tr|A0A0L8IH79|A0A0L8IH79_OCTBM Uncharacterized protein OS=Octopus bimaculoides OX=37653 GN=OCBIM_22005008mg PE=3 SV=1	833.39	833.884	300	307	APGFGDNR	0.787758	8
>tr|A0A6P7SER3|A0A6P7SER3_OCTVU hemocyanin 1-like OS=Octopus vulgaris OX=6645 GN=LOC115212215 PE=4 SV=2	1223.72	1224.6	732	742	VFVGFLLMGIK	0.78756	11
>tr|A0A6P7SDC4|A0A6P7SDC4_OCTVU hemocyanin G-type, units Oda to Odg OS=Octopus vulgaris OX=6645 GN=LOC115211670 PE=4 SV=2	1223.72	1224.6	751	761	VFVGFLLMGIK	0.78756	11
>Cluster-58773.162319;orf1 len=2921 frame:3 start:24 end:8786 gi|16596797|gb|AAK28276.2| hemocyanin G-type [Enteroctopus dofleini]	1223.72	1224.6	755	765	VFVGFLLMGIK	0.78756	11
>tr|Q9BJ58|Q9BJ58_ENTDO Hemocyanin G-type (Fragment) OS=Enteroctopus dofleini OX=267067 PE=4 SV=2	1223.72	1224.6	756	766	VFVGFLLMGIK	0.78756	11
>sp|O61363|HCYG_ENTDO Hemocyanin G-type, units Oda to Odg OS=Enteroctopus dofleini OX=267067 GN=ODHCY PE=1 SV=1	1223.72	1224.6	727	737	VFVGFLLMGIK	0.78756	11
>tr|A0A7E6EZI8|A0A7E6EZI8_OCTVU uncharacterized protein LOC115214248 OS=Octopus vulgaris OX=6645 GN=LOC115214248 PE=4 SV=1	962.473	963.087	324	330	FSYNLYR	0.787077	7
>tr|A0A6P7SYF5|A0A6P7SYF5_OCTVU retinal dehydrogenase 2 OS=Octopus vulgaris OX=6645 GN=LOC115217865 PE=3 SV=1	1506.82	1507.74	114	127	SSLGDIEFGLSLLR	0.786417	14
>tr|A0A7E6EW98|A0A7E6EW98_OCTVU 10-formyltetrahydrofolate dehydrogenase OS=Octopus vulgaris OX=6645 GN=LOC115216749 PE=3 SV=1	1109.56	1110.26	864	874	TDVAAPFGGFK	0.785793	11
>tr|A0A6P7S854|A0A6P7S854_OCTVU neuroglian isoform X1 OS=Octopus vulgaris OX=6645 GN=LOC115210201 PE=4 SV=1	1654.86	1655.95	161	174	FISPGQPVGLYYWK	0.785732	14
>tr|A0A6P7SER3|A0A6P7SER3_OCTVU hemocyanin 1-like OS=Octopus vulgaris OX=6645 GN=LOC115212215 PE=4 SV=2	2178.2	2179.58	4840	4859	VPLKPFSFGAPYNLNALTTK	0.785045	20
>tr|A0A6P7SDC4|A0A6P7SDC4_OCTVU hemocyanin G-type, units Oda to Odg OS=Octopus vulgaris OX=6645 GN=LOC115211670 PE=4 SV=2	2178.2	2179.58	1937	1956	VPLKPFSFGAPYNLNALTTK	0.785045	20
>Cluster-58773.162319;orf1 len=2921 frame:3 start:24 end:8786 gi|16596797|gb|AAK28276.2| hemocyanin G-type [Enteroctopus dofleini]	2178.2	2179.58	1941	1960	VPLKPFSFGAPYNLNALTTK	0.785045	20
>Cluster-58773.162759;orf1 len=276 frame:2 start:2 end:829 gi|524875728|ref|XP_005094588.1| PREDICTED: uncharacterized protein LOC101847027 isoform X1 [Aplysia californica]>gi|524875730|ref|XP_005094589.1| PREDICTED: uncharacterized protein LOC101847027 isoform X1 [Aplysia californica]	1827.92	1829.21	155	173	IGVTGFCMGGALAFASAVR	0.784922	19
>tr|A0A6P7SVM2|A0A6P7SVM2_OCTVU Spectrin beta chain OS=Octopus vulgaris OX=6645 GN=LOC115216977 PE=3 SV=1	1220.62	1221.54	172	181	DALLLWCQMK	0.784712	10
>tr|A0A077B6R8|A0A077B6R8_EUPSC Hemocyanin subunit 1 OS=Euprymna scolopes OX=6613 GN=HCY1 PE=2 SV=1	1851.84	1853.22	505	520	VACCVHGMATFPHWHR	0.784531	16
>tr|A0A812CD65|A0A812CD65_SEPPH Uncharacterized protein OS=Sepia pharaonis OX=158019 GN=SPHA_33819 PE=4 SV=1	1851.84	1853.22	506	521	VACCVHGMATFPHWHR	0.784531	16
>tr|A0A6P7U0P7|A0A6P7U0P7_OCTVU zinc finger ZZ-type and EF-hand domain-containing protein 1 OS=Octopus vulgaris OX=6645 GN=LOC115228010 PE=4 SV=1	960.482	961.112	1112	1118	FDYLQFK	0.784155	7
>tr|W6CNR9|W6CNR9_SEPOF Hemocyanin subunit 3 OS=Sepia officinalis OX=6610 PE=2 SV=1	1198.64	1199.37	1832	1841	NPRPQLFGNR	0.784039	10
>tr|A0A812DEV9|A0A812DEV9_SEPPH Rab GDP dissociation inhibitor OS=Sepia pharaonis OX=158019 GN=SPHA_54563 PE=3 SV=1	2141.11	2142.48	221	239	SPYLYPLYGLGELPQGFAR	0.783641	19
>tr|A0A7E6FNE1|A0A7E6FNE1_OCTVU dystrophin isoform X4 OS=Octopus vulgaris OX=6645 GN=LOC115232614 PE=4 SV=1	3833.73	3836.37	2757	2789	NSMQQLHHALDCFLNWMAVVENSYCQLADHTSK	0.782879	33
>tr|A0A7E6EGR4|A0A7E6EGR4_OCTVU short-chain collagen C4-like OS=Octopus vulgaris OX=6645 GN=LOC118760927 PE=4 SV=1	1167.6	1168.47	119	129	QPAAVMMLPAR	0.78266	11
>tr|A0A6P7TEG5|A0A6P7TEG5_OCTVU Alpha-L-fucosidase OS=Octopus vulgaris OX=6645 GN=LOC115223232 PE=3 SV=1	1211.61	1212.46	80	89	IPAYIDFMNK	0.782648	10
>tr|A0A6P7U0P7|A0A6P7U0P7_OCTVU zinc finger ZZ-type and EF-hand domain-containing protein 1 OS=Octopus vulgaris OX=6645 GN=LOC115228010 PE=4 SV=1	855.461	856.015	565	571	SVDLFFK	0.782496	7
>tr|A0A7E6FT44|A0A7E6FT44_OCTVU 4-hydroxyphenylpyruvate dioxygenase OS=Octopus vulgaris OX=6645 GN=LOC115226087 PE=3 SV=1	1105.54	1106.27	40	48	FGFEPFAYK	0.782411	9
>tr|A0A6P7TQ10|A0A6P7TQ10_OCTVU uncharacterized protein LOC115225177 OS=Octopus vulgaris OX=6645 GN=LOC115225177 PE=4 SV=1	1064.52	1065.29	604	611	YLFSIYCR	0.781835	8
>Cluster-58773.104902;orf1 len=592 frame:3 start:618 end:2393 gi|524870221|ref|XP_005091896.1| PREDICTED: xaa-Pro dipeptidase-like [Aplysia californica]	1859.93	1861.25	406	422	GVFAAMKPGVSWVDMHK	0.781671	17
>Cluster-58773.156686;orf1 len=474 frame:3 start:477 end:1898 gi|762073747|ref|XP_011435353.1| PREDICTED: serine hydroxymethyltransferase, cytosolic-like [Crassostrea gigas]>gi|405966819|gb|EKC32056.1| Serine hydroxymethyltransferase, cytosolic [Crassostrea gigas]	985.462	986.076	430	438	SGPSFSEFK	0.78147	9
>tr|A0A7E6EZI8|A0A7E6EZI8_OCTVU uncharacterized protein LOC115214248 OS=Octopus vulgaris OX=6645 GN=LOC115214248 PE=4 SV=1	1703.9	1704.98	619	634	FNLFAKPAGQPGGFPR	0.78147	16
>tr|A0A6P7SBT2|A0A6P7SBT2_OCTVU Hydroxyacid-oxoacid transhydrogenase OS=Octopus vulgaris OX=6645 GN=LOC115210878 PE=3 SV=1	1490.74	1491.7	22	33	WNIYSPDFVPPR	0.781297	12
>tr|W6CNR9|W6CNR9_SEPOF Hemocyanin subunit 3 OS=Sepia officinalis OX=6610 PE=2 SV=1	990.41	991.076	435	442	DYHDPGMR	0.780539	8
>Cluster-58773.141566;orf1 len=422 frame:2 start:2 end:1267 gi|405964948|gb|EKC30386.1| Fructose-bisphosphate aldolase [Crassostrea gigas]	2904.43	2906.44	274	300	ALADHHIFLEGTLLKPNMCTAGHSCPK	0.780367	27
>tr|A0A6P7TQ10|A0A6P7TQ10_OCTVU uncharacterized protein LOC115225177 OS=Octopus vulgaris OX=6645 GN=LOC115225177 PE=4 SV=1	1628.95	1630.1	3	16	CFTLFLLLLGITFK	0.780223	14
>tr|A0A7E6EZI8|A0A7E6EZI8_OCTVU uncharacterized protein LOC115214248 OS=Octopus vulgaris OX=6645 GN=LOC115214248 PE=4 SV=1	1097.54	1098.21	6585	6594	SGPATFFSQR	0.779658	10
>tr|A0A6P7TMW4|A0A6P7TMW4_OCTVU heat shock protein HSP 90-alpha isoform X2 OS=Octopus vulgaris OX=6645 GN=LOC115224220 PE=3 SV=1	1098.49	1099.26	328	336	APFDMFENK	0.779555	9
>tr|A0A6P7SVM1|A0A6P7SVM1_OCTVU protein-glucosylgalactosylhydroxylysine glucosidase isoform X2 OS=Octopus vulgaris OX=6645 GN=LOC115216968 PE=4 SV=1	3580.63	3583.02	623	655	MWSEYNDGTGAVNFLTGMGGFLQSLTFGYGGFR	0.778298	33
>tr|A0A7E6F497|A0A7E6F497_OCTVU ATP-citrate synthase OS=Octopus vulgaris OX=6645 GN=LOC115216353 PE=3 SV=1	1631.88	1633.04	722	736	ITKPLVAWCIGTCAR	0.777638	15
>tr|A0A7E6EXQ9|A0A7E6EXQ9_OCTVU cytosolic non-specific dipeptidase isoform X2 OS=Octopus vulgaris OX=6645 GN=LOC115213823 PE=3 SV=1	1782.84	1784.01	144	158	DIDFICISDNNWLSK	0.777345	15
>tr|A0A6P7T5D5|A0A6P7T5D5_OCTVU Aspartate aminotransferase OS=Octopus vulgaris OX=6645 GN=LOC115219838 PE=3 SV=1	1248.62	1249.38	288	298	IWSNPPNHGAR	0.77659	11
>Cluster-58773.197059;orf1 len=509 frame:1 start:352 end:1878 gi|260816652|ref|XP_002603202.1| hypothetical protein BRAFLDRAFT_281736 [Branchiostoma floridae]>gi|229288519|gb|EEN59213.1| hypothetical protein BRAFLDRAFT_281736 [Branchiostoma floridae]	1311.57	1312.52	221	231	NHAYNVGCMFR	0.775941	11
>tr|A0A6P7TMY2|A0A6P7TMY2_OCTVU Fumarylacetoacetase OS=Octopus vulgaris OX=6645 GN=LOC115226547 PE=3 SV=2	1311.57	1312.52	154	164	NHAYNVGCMFR	0.775941	11
>tr|F0V3W2|F0V3W2_LEPCI Hemocyanin (Fragment) OS=Lepidochitona cinerea OX=256056 PE=2 SV=1	958.547	959.143	1491	1498	KPLNPFSR	0.774941	8
>tr|W6CNR9|W6CNR9_SEPOF Hemocyanin subunit 3 OS=Sepia officinalis OX=6610 PE=2 SV=1	1243.76	1244.58	1579	1589	IFVGFLLHGIK	0.774242	11
>tr|A0A6P7T526|A0A6P7T526_OCTVU probable phosphoglycerate mutase OS=Octopus vulgaris OX=6645 GN=LOC115219769 PE=3 SV=1	1633.92	1634.98	161	174	ALPFWHDVIVPALR	0.77311	14
>tr|A0A6P7TV68|A0A6P7TV68_OCTVU 26S proteasome non-ATPase regulatory subunit 6 OS=Octopus vulgaris OX=6645 GN=LOC115229467 PE=3 SV=1	1993.92	1995.28	259	274	SFLFSLYDCQYASFFR	0.77293	16
>tr|W6CNR9|W6CNR9_SEPOF Hemocyanin subunit 3 OS=Sepia officinalis OX=6610 PE=2 SV=1	1370.81	1371.72	2084	2095	IFPEPAIIFVPK	0.772886	12
>tr|A0A7E6FD92|A0A7E6FD92_OCTVU insulin-degrading enzyme OS=Octopus vulgaris OX=6645 GN=LOC115219912 PE=3 SV=1	1032.51	1033.18	533	540	AYLSFEFR	0.77223	8
>tr|A0A0L8G0N4|A0A0L8G0N4_OCTBM Prolyl endopeptidase OS=Octopus bimaculoides OX=37653 GN=OCBIM_22003476mg PE=3 SV=1	1297.62	1298.51	171	181	CGSDWITIQFK	0.770981	11
>tr|A0A0L8GC35|A0A0L8GC35_OCTBM N-acyl-L-amino-acid amidohydrolase OS=Octopus bimaculoides OX=37653 GN=OCBIM_22036825mg PE=3 SV=1	981.432	982.072	204	213	CPGNPGHGSR	0.770906	10
>tr|A0A6P7TUI8|A0A6P7TUI8_OCTVU uncharacterized protein LOC115225721 OS=Octopus vulgaris OX=6645 GN=LOC115225721 PE=3 SV=1	2080.21	2081.63	3	21	ILSICFLLSLALFLGISEK	0.770814	19
>tr|A0A6P7T0X7|A0A6P7T0X7_OCTVU ganglioside GM2 activator OS=Octopus vulgaris OX=6645 GN=LOC115218607 PE=4 SV=1	820.402	820.992	183	190	QAFAGCLK	0.770541	8
>tr|A0A6P7TN39|A0A6P7TN39_OCTVU Proteasome subunit beta OS=Octopus vulgaris OX=6645 GN=LOC115223857 PE=3 SV=1	1058.47	1059.2	12	20	SGFVFENCR	0.77052	9
>Cluster-58773.147322;orf1 len=499 frame:3 start:3 end:1499 gi|676461383|ref|XP_009055926.1| hypothetical protein LOTGIDRAFT_161773 [Lottia gigantea]>gi|556104570|gb|ESO93222.1| hypothetical protein LOTGIDRAFT_161773 [Lottia gigantea]	1009.55	1010.19	292	300	DFLAGLAFR	0.769663	9
>tr|A0A0L8HU60|A0A0L8HU60_OCTBM Tetratricopeptide repeat protein 38 OS=Octopus bimaculoides OX=37653 GN=OCBIM_22006847mg PE=3 SV=1	1984.98	1986.32	128	143	FAHDSYFFLGLRPQMR	0.769208	16
>tr|A0A6P7SDN6|A0A6P7SDN6_OCTVU gelsolin-like protein 2 OS=Octopus vulgaris OX=6645 GN=LOC115211664 PE=4 SV=1	1164.58	1165.35	91	99	YDVHFWIGK	0.769021	9
>tr|A0A6P7SVM1|A0A6P7SVM1_OCTVU protein-glucosylgalactosylhydroxylysine glucosidase isoform X2 OS=Octopus vulgaris OX=6645 GN=LOC115216968 PE=4 SV=1	1272.68	1273.48	713	724	ESGLDIPLPFGK	0.768585	12
>tr|Q27Q56|Q27Q56_SEPOF Hemocyanin subunit 2 (Fragment) OS=Sepia officinalis OX=6610 PE=2 SV=1	1201.71	1202.49	1563	1573	VFAGFLLHGIK	0.768326	11
>tr|A0A812CBN1|A0A812CBN1_SEPPH Uncharacterized protein OS=Sepia pharaonis OX=158019 GN=SPHA_33848 PE=4 SV=1	1201.71	1202.49	1138	1148	VFAGFLLHGIK	0.768326	11
>tr|A0A077B6R8|A0A077B6R8_EUPSC Hemocyanin subunit 1 OS=Euprymna scolopes OX=6613 GN=HCY1 PE=2 SV=1	1201.71	1202.49	1581	1591	VFAGFLLHGIK	0.768326	11
>tr|A0A0L8GIJ0|A0A0L8GIJ0_OCTBM VWFA domain-containing protein (Fragment) OS=Octopus bimaculoides OX=37653 GN=OCBIM_22032938mg PE=4 SV=1	2117.77	2119.52	228	244	MCGEECMCCTQVYEWFR	0.768059	17
>Cluster-58773.104902;orf1 len=592 frame:3 start:618 end:2393 gi|524870221|ref|XP_005091896.1| PREDICTED: xaa-Pro dipeptidase-like [Aplysia californica]	1266.56	1267.41	148	157	YCSDHEPLFR	0.767897	10
>tr|A0A6P7TM22|A0A6P7TM22_OCTVU Tetratricopeptide repeat protein 38 OS=Octopus vulgaris OX=6645 GN=LOC115223987 PE=3 SV=1	958.463	959.053	289	296	DSASFLYR	0.76657	8
>tr|A0A6P7SE31|A0A6P7SE31_OCTVU 26S proteasome non-ATPase regulatory subunit 2 OS=Octopus vulgaris OX=6645 GN=LOC115211842 PE=3 SV=1	3155.56	3157.67	492	523	STTEIIGMAALSCGLISVGSCNGDVSSTIIQK	0.76581	32
>tr|A0A0L8HU60|A0A0L8HU60_OCTBM Tetratricopeptide repeat protein 38 OS=Octopus bimaculoides OX=37653 GN=OCBIM_22006847mg PE=3 SV=1	1162.49	1163.3	294	302	WSSCFEEFK	0.765732	9
>tr|A0A6P7TRV9|A0A6P7TRV9_OCTVU Ubiquitin-activating enzyme E1 OS=Octopus vulgaris OX=6645 GN=LOC115225288 PE=3 SV=1	1874.94	1876.26	593	609	CVYYCKPLLESGTLGTK	0.765438	17
>tr|A0A7E6EHE9|A0A7E6EHE9_OCTVU prosaposin isoform X1 OS=Octopus vulgaris OX=6645 GN=LOC115209891 PE=4 SV=1	1994.96	1996.39	445	464	SIESLLDPVAGCTAVGMCTK	0.76525	20
>tr|A0A0L8FMS3|A0A0L8FMS3_OCTBM VWFC domain-containing protein OS=Octopus bimaculoides OX=37653 GN=OCBIM_22013879mg PE=4 SV=1	1764.75	1766.04	873	888	GECIKPTDCPCYHNGK	0.76504	16
>tr|A0A812E3Y7|A0A812E3Y7_SEPPH RAB11A OS=Sepia pharaonis OX=158019 GN=SPHA_67892 PE=4 SV=1	2283.2	2284.76	220	241	LSLSLSLSLSLSLSLSLSACWC	0.764462	22
>tr|A0A0L8G8E4|A0A0L8G8E4_OCTBM TGc domain-containing protein OS=Octopus bimaculoides OX=37653 GN=OCBIM_22038334mg PE=3 SV=1	1334.72	1335.56	64	75	GSSFILGLTFHR	0.764413	12
>tr|A0A7E6FLF6|A0A7E6FLF6_OCTVU leukotriene A-4 hydrolase-like OS=Octopus vulgaris OX=6645 GN=LOC115223638 PE=3 SV=1	1554.74	1555.87	69	82	FIGEANCIPFVNCK	0.76429	14
>Cluster-58773.168901;orf1 len=432 frame:1 start:457 end:1752 gi|762151209|ref|XP_011413584.1| PREDICTED: aspartate aminotransferase, mitochondrial-like, partial [Crassostrea gigas] >Cluster-58773.168923;orf1 len=432 frame:2 start:548 end:1843 gi|762151209|ref|XP_011413584.1| PREDICTED: aspartate aminotransferase, mitochondrial-like, partial [Crassostrea gigas]	1972	1973.25	155	171	DFYIPSPSWGNHTPILK	0.764163	17
>tr|A0A0L8H9P1|A0A0L8H9P1_OCTBM Uncharacterized protein OS=Octopus bimaculoides OX=37653 GN=OCBIM_22019540mg PE=3 SV=1	1330.68	1331.52	172	183	SHDSFGFPPVLK	0.763819	12
>Cluster-58773.161841;orf1 len=169 frame:-2 start:507 end:1 gi|340742817|gb|AEK65120.1| arginine kinase [Amphioctopus fangsiao]	1330.68	1331.52	116	127	SHDSFGFPPVLK	0.763819	12
>tr|Q27Q56|Q27Q56_SEPOF Hemocyanin subunit 2 (Fragment) OS=Sepia officinalis OX=6610 PE=2 SV=1	1881.99	1883.17	2065	2081	VSNDIFPSPSVVWIHGK	0.763738	17
>tr|A0A0L8FTG9|A0A0L8FTG9_OCTBM Amine oxidase OS=Octopus bimaculoides OX=37653 GN=OCBIM_22008553mg PE=3 SV=1	1724.86	1726.02	107	120	MNFLAWLDANNLFR	0.763539	14
>Cluster-58773.156686;orf1 len=474 frame:3 start:477 end:1898 gi|762073747|ref|XP_011435353.1| PREDICTED: serine hydroxymethyltransferase, cytosolic-like [Crassostrea gigas]>gi|405966819|gb|EKC32056.1| Serine hydroxymethyltransferase, cytosolic [Crassostrea gigas]	1004.48	1005.18	465	473	FPMPGLDDL	0.763398	9
>tr|A0A0L8G5K6|A0A0L8G5K6_OCTBM Uncharacterized protein OS=Octopus bimaculoides OX=37653 GN=OCBIM_22000375mg PE=4 SV=1	1759.95	1761.09	973	987	IVFSGVPNPEVLWFR	0.763305	15
>tr|A0A6P7TES8|A0A6P7TES8_OCTVU uncharacterized protein LOC115222385 OS=Octopus vulgaris OX=6645 GN=LOC115222385 PE=3 SV=1	1224.62	1225.4	1	11	MSWEAWAPHLK	0.763223	11
>tr|A0A6P7TRV9|A0A6P7TRV9_OCTVU Ubiquitin-activating enzyme E1 OS=Octopus vulgaris OX=6645 GN=LOC115225288 PE=3 SV=1	888.53	889.092	306	312	LDFKPLR	0.763056	7
>tr|A0A0L8GSZ5|A0A0L8GSZ5_OCTBM Histone H4 OS=Octopus bimaculoides OX=37653 GN=OCBIM_22029078mg PE=3 SV=1	944.531	945.116	21	29	AGLQFPVGR	0.762701	9
>tr|A0A6P7TRF4|A0A6P7TRF4_OCTVU catalase OS=Octopus vulgaris OX=6645 GN=LOC115228352 PE=3 SV=1	1720.88	1722.03	363	377	LGSNYLQLPVNCPFR	0.762101	15
>tr|A0A6P7S854|A0A6P7S854_OCTVU neuroglian isoform X1 OS=Octopus vulgaris OX=6645 GN=LOC115210201 PE=4 SV=1	1230.69	1231.49	66	75	GIPKPEIYWK	0.76207	10
>tr|A0A0L8FMS3|A0A0L8FMS3_OCTBM VWFC domain-containing protein OS=Octopus bimaculoides OX=37653 GN=OCBIM_22013879mg PE=4 SV=1	1914.83	1916.09	1045	1061	SGNFYEIGEVWNDGPCK	0.762057	17
>tr|A0A6P7SMT0|A0A6P7SMT0_OCTVU dehydrogenase/reductase SDR family member 4 isoform X1 OS=Octopus vulgaris OX=6645 GN=LOC115214531 PE=4 SV=1	1874.97	1876.14	33	47	KPHHPEFELTAWNLR	0.76172	15
>tr|Q27Q56|Q27Q56_SEPOF Hemocyanin subunit 2 (Fragment) OS=Sepia officinalis OX=6610 PE=2 SV=1	2399.15	2400.67	1763	1782	GSDVAVPYWDWIEPFDHLPR	0.761558	20
>tr|A0A6P7S965|A0A6P7S965_OCTVU ras GTPase-activating protein-binding protein 2 OS=Octopus vulgaris OX=6645 GN=LOC115210285 PE=4 SV=1	1429.66	1430.55	408	423	GAGGSGPEGGRPMSGR	0.761544	16
>tr|A0A6P7T7N8|A0A6P7T7N8_OCTVU dihydropteridine reductase OS=Octopus vulgaris OX=6645 GN=LOC115219744 PE=4 SV=1	852.356	852.947	96	102	SADDMWK	0.76024	7
>tr|A0A6P7SIX4|A0A6P7SIX4_OCTVU Inorganic diphosphatase OS=Octopus vulgaris OX=6645 GN=LOC115213471 PE=3 SV=2	972.457	973.082	362	368	ATYEWFR	0.760102	7
>tr|A0A812CBN1|A0A812CBN1_SEPPH Uncharacterized protein OS=Sepia pharaonis OX=158019 GN=SPHA_33848 PE=4 SV=1	1436.85	1437.78	2192	2205	LLPPPTVLFKPGTG	0.760052	14
>tr|A0A6P7SKR8|A0A6P7SKR8_OCTVU Vesicle-fusing ATPase OS=Octopus vulgaris OX=6645 GN=LOC115213827 PE=4 SV=1 >tr|A0A0L8GAT1|A0A0L8GAT1_OCTBM Vesicle-fusing ATPase OS=Octopus bimaculoides OX=37653 GN=OCBIM_22037045mg PE=4 SV=1	1839.92	1841.15	565	581	SAAPCILFFDELDSIAK	0.759601	17
>tr|A0A7E6EK24|A0A7E6EK24_OCTVU deoxynucleoside triphosphate triphosphohydrolase SAMHD1-like OS=Octopus vulgaris OX=6645 GN=LOC115231394 PE=4 SV=1	823.41	823.932	194	199	WDYLAR	0.759589	6
>tr|A0A6P7U4P1|A0A6P7U4P1_OCTVU deoxynucleoside triphosphate triphosphohydrolase SAMHD1-like isoform X2 OS=Octopus vulgaris OX=6645 GN=LOC115231345 PE=4 SV=1	823.41	823.932	193	198	WDYLAR	0.759589	6
>Cluster-58773.190283;orf1 len=447 frame:2 start:353 end:1693 gi|617418760|ref|XP_007557771.1| PREDICTED: deoxynucleoside triphosphate triphosphohydrolase SAMHD1-like [Poecilia formosa]	823.41	823.932	239	244	WDYLAR	0.759589	6
>Cluster-58773.136028;orf1 len=262 frame:2 start:116 end:901 gi|291233326|ref|XP_002736601.1| PREDICTED: UPF0462 protein C4orf33 homolog [Saccoglossus kowalevskii]	2072.18	2073.54	28	46	LFALALLFFVGATYSLPTK	0.75909	19
>tr|A0A7E6FQN6|A0A7E6FQN6_OCTVU insulin-like growth factor-binding protein complex acid labile subunit isoform X7 OS=Octopus vulgaris OX=6645 GN=LOC115225305 PE=4 SV=1	1904.8	1906.24	496	513	WTSDVSCVVCCTGNLCSK	0.759035	18
>Cluster-58773.148525;orf1 len=812 frame:2 start:422 end:2857 gi|676447145|ref|XP_009051312.1| hypothetical protein LOTGIDRAFT_201834 [Lottia gigantea]>gi|556109335|gb|ESO97987.1| hypothetical protein LOTGIDRAFT_201834 [Lottia gigantea]	2277.14	2278.71	102	123	LAACFLDSMATLGLAAYGYGIR	0.758614	22
>tr|A0A7E6F497|A0A7E6F497_OCTVU ATP-citrate synthase OS=Octopus vulgaris OX=6645 GN=LOC115216353 PE=3 SV=1	1474.71	1475.72	803	815	APPTVPMDYAWAR	0.758554	13
>tr|A0A7E6EXQ9|A0A7E6EXQ9_OCTVU cytosolic non-specific dipeptidase isoform X2 OS=Octopus vulgaris OX=6645 GN=LOC115213823 PE=3 SV=1	1192.63	1193.42	159	168	NRPCLTYGLR	0.758485	10
>tr|A0A6P7STJ4|A0A6P7STJ4_OCTVU Carboxylic ester hydrolase OS=Octopus vulgaris OX=6645 GN=LOC115216415 PE=3 SV=1	2045.95	2047.27	553	570	EPSCPVPSGSQNIWNFQR	0.758075	18
>Cluster-58773.74875;orf1 len=741 frame:2 start:1832 end:4054 gi|159006|gb|AAA16244.1| peroxidase-like protein, partial [Euprymna scolopes]	1437.76	1438.68	546	556	DVGLRPYIYWR	0.757754	11
>tr|A0A7E6FFI6|A0A7E6FFI6_OCTVU chorion peroxidase-like OS=Octopus vulgaris OX=6645 GN=LOC115221248 PE=4 SV=1	1437.76	1438.68	438	448	DVGLRPYIYWR	0.757754	11
>tr|A0A6P7SGA6|A0A6P7SGA6_OCTVU Clathrin heavy chain OS=Octopus vulgaris OX=6645 GN=LOC115212844 PE=3 SV=1	1170.67	1171.5	858	866	LLLPWLEMR	0.757521	9
>tr|Q27Q56|Q27Q56_SEPOF Hemocyanin subunit 2 (Fragment) OS=Sepia officinalis OX=6610 PE=2 SV=1	1041.53	1042.21	478	486	CPRPDALNR	0.757253	9
>tr|A0A812CBN1|A0A812CBN1_SEPPH Uncharacterized protein OS=Sepia pharaonis OX=158019 GN=SPHA_33848 PE=4 SV=1	1041.53	1042.21	55	63	CPRPDALNR	0.757253	9
>tr|W6CNR9|W6CNR9_SEPOF Hemocyanin subunit 3 OS=Sepia officinalis OX=6610 PE=2 SV=1	1041.53	1042.21	495	503	CPRPDALNR	0.757253	9
>tr|A0A812CD65|A0A812CD65_SEPPH Uncharacterized protein OS=Sepia pharaonis OX=158019 GN=SPHA_33819 PE=4 SV=1	1041.53	1042.21	497	505	CPRPDALNR	0.757253	9
>tr|A0A6P7S854|A0A6P7S854_OCTVU neuroglian isoform X1 OS=Octopus vulgaris OX=6645 GN=LOC115210201 PE=4 SV=1	1698.92	1700	415	429	YGEIFAGISFNVILR	0.757176	15
>tr|A0A7E6FDU1|A0A7E6FDU1_OCTVU Glucose-6-phosphate 1-dehydrogenase OS=Octopus vulgaris OX=6645 GN=LOC115220357 PE=3 SV=1	1523.83	1524.81	64	76	LLPPETYFIGFAR	0.756803	13
>tr|A0A6P7SYQ3|A0A6P7SYQ3_OCTVU pancreatic triacylglycerol lipase-like OS=Octopus vulgaris OX=6645 GN=LOC115217380 PE=3 SV=1	1434.9	1435.8	264	278	IPGAIVGGIIGLLNK	0.756462	15
>tr|A0A7E6EY74|A0A7E6EY74_OCTVU twitchin OS=Octopus vulgaris OX=6645 GN=LOC115213975 PE=3 SV=1	1776.91	1778.03	570	584	EKPTAQWFFGNNPLK	0.755992	15
>tr|A0A6P7SGA6|A0A6P7SGA6_OCTVU Clathrin heavy chain OS=Octopus vulgaris OX=6645 GN=LOC115212844 PE=3 SV=1	2038.96	2040.34	925	942	GLCDQELINVCNENSLFK	0.755773	18
>tr|A0A6P7SH66|A0A6P7SH66_OCTVU alpha-actinin, sarcomeric isoform X3 OS=Octopus vulgaris OX=6645 GN=LOC115212896 PE=4 SV=1	1157.67	1158.39	161	170	LASDLLAWIR	0.755703	10
>tr|A0A812CG60|A0A812CG60_SEPPH ARF1_2 OS=Sepia pharaonis OX=158019 GN=SPHA_38611 PE=3 SV=1	3033.43	3035.38	196	222	TWYIQATCATSGDGLYEGLDWLSNQLK	0.75492	27
>tr|A0A7E6FRZ6|A0A7E6FRZ6_OCTVU hemocyanin G-type, units Oda to Odg-like OS=Octopus vulgaris OX=6645 GN=LOC115225590 PE=4 SV=1	938.546	939.152	2824	2831	VYAGFLLR	0.754354	8
>tr|A0A6P7SDN6|A0A6P7SDN6_OCTVU gelsolin-like protein 2 OS=Octopus vulgaris OX=6645 GN=LOC115211664 PE=4 SV=1	2559.25	2560.97	323	346	NGIPYAHTFLNCAGNPQCPITVTK	0.753719	24
>tr|A0A6P7TD81|A0A6P7TD81_OCTVU dipeptidyl peptidase 2 isoform X1 OS=Octopus vulgaris OX=6645 GN=LOC115222860 PE=3 SV=1	981.49	982.093	445	453	GGAHHFDLK	0.753568	9
>Cluster-58773.109971;orf1 len=194 frame:2 start:2 end:583 gi|762113409|ref|XP_011439462.1| PREDICTED: inter-alpha-trypsin inhibitor heavy chain H3-like [Crassostrea gigas]	3305.61	3307.86	134	163	VPSFQHSPGVLIKPLNCSTDLCFTDSIQCR	0.75315	30
>tr|A0A7E6EZI8|A0A7E6EZI8_OCTVU uncharacterized protein LOC115214248 OS=Octopus vulgaris OX=6645 GN=LOC115214248 PE=4 SV=1	1378.67	1379.52	6386	6398	GYAAPDPSAFLNR	0.752598	13
>Cluster-58773.93343;orf1 len=501 frame:1 start:1 end:1503 gi|762076444|ref|XP_011445523.1| PREDICTED: xylose isomerase-like [Crassostrea gigas] >Cluster-58773.93344;orf1 len=501 frame:1 start:1 end:1503 gi|762076444|ref|XP_011445523.1| PREDICTED: xylose isomerase-like [Crassostrea gigas]	946.467	947.085	145	152	AAFEFFSK	0.75246	8
>tr|A0A6P7SER3|A0A6P7SER3_OCTVU hemocyanin 1-like OS=Octopus vulgaris OX=6645 GN=LOC115212215 PE=4 SV=2	1867.83	1869.22	480	495	VACCVHGMSTFPHWHR	0.751841	16
>tr|A0A6P7SDC4|A0A6P7SDC4_OCTVU hemocyanin G-type, units Oda to Odg OS=Octopus vulgaris OX=6645 GN=LOC115211670 PE=4 SV=2	1867.83	1869.22	499	514	VACCVHGMSTFPHWHR	0.751841	16
>Cluster-58773.162319;orf1 len=2921 frame:3 start:24 end:8786 gi|16596797|gb|AAK28276.2| hemocyanin G-type [Enteroctopus dofleini]	1867.83	1869.22	503	518	VACCVHGMSTFPHWHR	0.751841	16
>tr|Q9BJ58|Q9BJ58_ENTDO Hemocyanin G-type (Fragment) OS=Enteroctopus dofleini OX=267067 PE=4 SV=2	1867.83	1869.22	504	519	VACCVHGMSTFPHWHR	0.751841	16
>sp|O61363|HCYG_ENTDO Hemocyanin G-type, units Oda to Odg OS=Enteroctopus dofleini OX=267067 GN=ODHCY PE=1 SV=1	1867.83	1869.22	475	490	VACCVHGMSTFPHWHR	0.751841	16
>tr|A0A6P7U0P7|A0A6P7U0P7_OCTVU zinc finger ZZ-type and EF-hand domain-containing protein 1 OS=Octopus vulgaris OX=6645 GN=LOC115228010 PE=4 SV=1	2051.03	2052.43	487	504	VLQNFPDLSLSCNQLMTK	0.751709	18
>tr|A0A0L8GKZ1|A0A0L8GKZ1_OCTBM Helicase C-terminal domain-containing protein OS=Octopus bimaculoides OX=37653 GN=OCBIM_22031992mg PE=4 SV=1	936.497	937.156	43	50	FCTSLPIR	0.751131	8
>tr|A0A6P7TXK0|A0A6P7TXK0_OCTVU medium-chain specific acyl-CoA dehydrogenase, mitochondrial OS=Octopus vulgaris OX=6645 GN=LOC115228127 PE=3 SV=1	2012.02	2013.39	182	198	MWITNGGVANWYFLLAR	0.751126	17
>tr|A0A812CBN1|A0A812CBN1_SEPPH Uncharacterized protein OS=Sepia pharaonis OX=158019 GN=SPHA_33848 PE=4 SV=1	1135.59	1136.3	126	134	ETKPNPFFR	0.750787	9
>tr|A0A6P7TAQ3|A0A6P7TAQ3_OCTVU von Willebrand factor C domain-containing protein 2-like OS=Octopus vulgaris OX=6645 GN=LOC115222123 PE=4 SV=1	2147.17	2148.63	3	21	HSAIVFVLLYCTWGISPIK	0.75057	19
>tr|A0A6P7T046|A0A6P7T046_OCTVU glyoxylate reductase/hydroxypyruvate reductase OS=Octopus vulgaris OX=6645 GN=LOC115218137 PE=3 SV=1	1126.66	1127.38	11	20	IPPVGIDLFR	0.750485	10
>tr|A0A0L8H9P1|A0A0L8H9P1_OCTBM Uncharacterized protein OS=Octopus bimaculoides OX=37653 GN=OCBIM_22019540mg PE=3 SV=1	2020.89	2022.34	305	322	DNMGYLTFCPSNLGTTMR	0.749652	18
>tr|G0Y7C4|G0Y7C4_9MOLL Arginine kinase OS=Sepiella maindroni OX=153280 GN=AK PE=2 SV=1	2020.89	2022.34	257	274	DNMGYLTFCPSNLGTTMR	0.749652	18
>tr|A0A6P7TYT0|A0A6P7TYT0_OCTVU Histidine--tRNA ligase OS=Octopus vulgaris OX=6645 GN=LOC115230998 PE=3 SV=2	924.37	925.079	223	229	MDWCDVR	0.749394	7
>Cluster-58773.174459;orf1 len=349 frame:-1 start:1047 end:1 gi|676459799|ref|XP_009055418.1| hypothetical protein LOTGIDRAFT_153262 [Lottia gigantea]>gi|556105140|gb|ESO93792.1| hypothetical protein LOTGIDRAFT_153262 [Lottia gigantea]	924.37	925.079	248	254	MDWCDVR	0.749394	7
>tr|A0A6P7T4Z8|A0A6P7T4Z8_OCTVU opine dehydrogenase OS=Octopus vulgaris OX=6645 GN=LOC115219799 PE=4 SV=1	1682.8	1684	140	154	TCAIVSFESLPWACR	0.749138	15
>tr|A0A7E6FRZ6|A0A7E6FRZ6_OCTVU hemocyanin G-type, units Oda to Odg-like OS=Octopus vulgaris OX=6645 GN=LOC115225590 PE=4 SV=1	1238.54	1239.41	2863	2871	HEMFWAFDR	0.749017	9
>Cluster-58773.47482;orf1 len=193 frame:2 start:59 end:637 gi|443711424|gb|ELU05212.1| hypothetical protein CAPTEDRAFT_211623 [Capitella teleta]	871.438	872.08	142	148	IFGMFEK	0.748497	7
>tr|A0A6P7TRV9|A0A6P7TRV9_OCTVU Ubiquitin-activating enzyme E1 OS=Octopus vulgaris OX=6645 GN=LOC115225288 PE=3 SV=1	2077.05	2078.47	395	414	GDICPIQAFIGGVTAQEVMK	0.748472	20
>tr|F0V3W2|F0V3W2_LEPCI Hemocyanin (Fragment) OS=Lepidochitona cinerea OX=256056 PE=2 SV=1	1289.55	1290.34	693	702	DAFDYQNNFR	0.747316	10
>tr|A0A6P7TH79|A0A6P7TH79_OCTVU Ferritin OS=Octopus vulgaris OX=6645 GN=LOC115223217 PE=3 SV=1	2071.18	2072.48	78	96	IILKPIEKPAHDAWGGGLR	0.747256	19
>tr|W6CNR9|W6CNR9_SEPOF Hemocyanin subunit 3 OS=Sepia officinalis OX=6610 PE=2 SV=1	2019.98	2021.36	2192	2208	HGAIVGVPYWDWTYPMK	0.747254	17
>tr|A0A812CD65|A0A812CD65_SEPPH Uncharacterized protein OS=Sepia pharaonis OX=158019 GN=SPHA_33819 PE=4 SV=1	1870.87	1872.12	1200	1215	AGEFYILGSENEMPWK	0.745481	16
>tr|A0A6P7SER3|A0A6P7SER3_OCTVU hemocyanin 1-like OS=Octopus vulgaris OX=6645 GN=LOC115212215 PE=4 SV=2	1201.71	1202.49	1556	1566	IFAGFLLHGVK	0.745444	11
>tr|A0A6P7SDC4|A0A6P7SDC4_OCTVU hemocyanin G-type, units Oda to Odg OS=Octopus vulgaris OX=6645 GN=LOC115211670 PE=4 SV=2	1201.71	1202.49	1575	1585	IFAGFLLHGVK	0.745444	11
>Cluster-58773.162319;orf1 len=2921 frame:3 start:24 end:8786 gi|16596797|gb|AAK28276.2| hemocyanin G-type [Enteroctopus dofleini]	1201.71	1202.49	1579	1589	IFAGFLLHGVK	0.745444	11
>tr|A0A0L8FFZ3|A0A0L8FFZ3_OCTBM Tyrosinase_Cu-bd domain-containing protein (Fragment) OS=Octopus bimaculoides OX=37653 GN=OCBIM_22022789mg PE=4 SV=1	1201.71	1202.49	174	184	IFAGFLLHGVK	0.745444	11
>tr|A0A7E6FNE1|A0A7E6FNE1_OCTVU dystrophin isoform X4 OS=Octopus vulgaris OX=6645 GN=LOC115232614 PE=4 SV=1	2219.15	2220.56	40	60	DLSDGCNLLSLLEVLSGETLK	0.745131	21
>Cluster-58773.140088;orf1 len=263 frame:2 start:32 end:820 gi|357608316|gb|EHJ65928.1| Ecdysteroid-regulated 16 kDa protein [Danaus plexippus]	2630.14	2631.98	193	216	FPSPTGDIECSLWSCFEVPEGCAR	0.74482	24
>tr|A0A812CBN1|A0A812CBN1_SEPPH Uncharacterized protein OS=Sepia pharaonis OX=158019 GN=SPHA_33848 PE=4 SV=1	1906.83	1908.25	1311	1326	YACCVHGMATFPQWHR	0.744399	16
>tr|A0A6P7T656|A0A6P7T656_OCTVU Aconitate hydratase, mitochondrial OS=Octopus vulgaris OX=6645 GN=LOC115219777 PE=3 SV=1	2327.16	2328.56	609	629	GHLDNISNNLLIGAVNYENEK	0.744015	21
>tr|A0A6P7SH66|A0A6P7SH66_OCTVU alpha-actinin, sarcomeric isoform X3 OS=Octopus vulgaris OX=6645 GN=LOC115212896 PE=4 SV=1	1215.63	1216.46	54	64	DGLAFCALIHR	0.744002	11
>tr|A0A7E6F5B1|A0A7E6F5B1_OCTVU collagen alpha-1(XII) chain-like OS=Octopus vulgaris OX=6645 GN=LOC118765117 PE=4 SV=1	2470.45	2472.11	1	24	MAPFLLFAVSLTILQLGNALPLMK	0.743087	24
>tr|A0A6P7TPR7|A0A6P7TPR7_OCTVU uncharacterized protein LOC115224696 OS=Octopus vulgaris OX=6645 GN=LOC115224696 PE=4 SV=2	2738.54	2740.33	1	25	MLLLPYWSIFLIISPHFIGTHAATK	0.742661	25
>tr|A0A6P7SWF0|A0A6P7SWF0_OCTVU probable methylmalonate-semialdehyde dehydrogenase [acylating], mitochondrial OS=Octopus vulgaris OX=6645 GN=LOC115217127 PE=3 SV=1	1391.67	1392.75	214	226	DPGACMILMELAK	0.742292	13
>tr|A0A7E6EHE9|A0A7E6EHE9_OCTVU prosaposin isoform X1 OS=Octopus vulgaris OX=6645 GN=LOC115209891 PE=4 SV=1	1503.67	1504.74	50	63	ECGAIEHCATVWGK	0.741691	14
>tr|W6CNR9|W6CNR9_SEPOF Hemocyanin subunit 3 OS=Sepia officinalis OX=6610 PE=2 SV=1	2026.9	2028.26	1778	1794	GSCNAVPYWDWIEPFDK	0.741461	17
>Cluster-58773.156686;orf1 len=474 frame:3 start:477 end:1898 gi|762073747|ref|XP_011435353.1| PREDICTED: serine hydroxymethyltransferase, cytosolic-like [Crassostrea gigas]>gi|405966819|gb|EKC32056.1| Serine hydroxymethyltransferase, cytosolic [Crassostrea gigas]	2162.06	2163.54	130	149	IMGLHLPDGGHLSHGFMTNK	0.74113	20
>tr|A0A6P7TRF4|A0A6P7TRF4_OCTVU catalase OS=Octopus vulgaris OX=6645 GN=LOC115228352 PE=3 SV=1	1542.83	1543.82	154	166	DPILFPSFIHTQK	0.74094	13
>tr|Q9BJ58|Q9BJ58_ENTDO Hemocyanin G-type (Fragment) OS=Enteroctopus dofleini OX=267067 PE=4 SV=2	2222.19	2223.59	1942	1961	VPLKPFSFGAPYNLNDLTTK	0.740188	20
>sp|O61363|HCYG_ENTDO Hemocyanin G-type, units Oda to Odg OS=Enteroctopus dofleini OX=267067 GN=ODHCY PE=1 SV=1	2222.19	2223.59	1913	1932	VPLKPFSFGAPYNLNDLTTK	0.740188	20
>tr|A0A6P7SUK9|A0A6P7SUK9_OCTVU Adenosylhomocysteinase OS=Octopus vulgaris OX=6645 GN=LOC115216611 PE=3 SV=1	1116.56	1117.26	422	430	GPFKPDHYR	0.740025	9
>Cluster-58773.162759;orf1 len=276 frame:2 start:2 end:829 gi|524875728|ref|XP_005094588.1| PREDICTED: uncharacterized protein LOC101847027 isoform X1 [Aplysia californica]>gi|524875730|ref|XP_005094589.1| PREDICTED: uncharacterized protein LOC101847027 isoform X1 [Aplysia californica]	1042.55	1043.28	199	207	IPLQCHFGK	0.739931	9
>tr|A0A6P7S417|A0A6P7S417_OCTVU chloride intracellular channel exc-4 OS=Octopus vulgaris OX=6645 GN=LOC115208761 PE=4 SV=1	2301.09	2302.76	27	46	GACPLCQQWYMVAYILAENK	0.739453	20
>tr|A0A6P7SGA6|A0A6P7SGA6_OCTVU Clathrin heavy chain OS=Octopus vulgaris OX=6645 GN=LOC115212844 PE=3 SV=1	1359.65	1360.54	1103	1114	CNDPAVWTQLGR	0.738694	12
>tr|A0A812CBN1|A0A812CBN1_SEPPH Uncharacterized protein OS=Sepia pharaonis OX=158019 GN=SPHA_33848 PE=4 SV=1	871.431	871.974	380	386	FGDYTLR	0.738677	7
>tr|W6CNR9|W6CNR9_SEPOF Hemocyanin subunit 3 OS=Sepia officinalis OX=6610 PE=2 SV=1	871.431	871.974	820	826	FGDYTLR	0.738677	7
>tr|A0A6P7U0P7|A0A6P7U0P7_OCTVU zinc finger ZZ-type and EF-hand domain-containing protein 1 OS=Octopus vulgaris OX=6645 GN=LOC115228010 PE=4 SV=1	3049.32	3051.49	798	823	AAIVDMFHYLCQTLDNQCDDTNPMYK	0.738331	26
>tr|A0A6P7STJ4|A0A6P7STJ4_OCTVU Carboxylic ester hydrolase OS=Octopus vulgaris OX=6645 GN=LOC115216415 PE=3 SV=1	1983.74	1985.04	495	513	SGNPNNGDCSDCSSEPWSK	0.7381	19
>tr|A0A077B6R8|A0A077B6R8_EUPSC Hemocyanin subunit 1 OS=Euprymna scolopes OX=6613 GN=HCY1 PE=2 SV=1	1976.97	1978.23	1366	1382	GAGVAVPYWNWIEPFDR	0.737799	17
>tr|A0A0L8IDH2|A0A0L8IDH2_OCTBM Non-specific serine/threonine protein kinase OS=Octopus bimaculoides OX=37653 GN=OCBIM_22020713mg PE=3 SV=1	1124.49	1125.32	224	233	CCSLSSPWNK	0.737745	10
>tr|A0A6P7T858|A0A6P7T858_OCTVU Fructose-bisphosphatase OS=Octopus vulgaris OX=6645 GN=LOC115220925 PE=3 SV=1	1648.9	1650	69	82	LDILSNDLFINMLK	0.737417	14
>tr|A0A7E6EHE9|A0A7E6EHE9_OCTVU prosaposin isoform X1 OS=Octopus vulgaris OX=6645 GN=LOC115209891 PE=4 SV=1	1865.03	1866.35	429	444	SSCLQLVMEYKPLIIK	0.735918	16
>tr|A0A6P7SMT0|A0A6P7SMT0_OCTVU dehydrogenase/reductase SDR family member 4 isoform X1 OS=Octopus vulgaris OX=6645 GN=LOC115214531 PE=4 SV=1	2788.4	2790.23	164	190	GGGSIIFVSSILGYHPEAFLGCYSVSK	0.735411	27
>Cluster-58773.127031;orf1 len=154 frame:-3 start:549 end:88 gi|405978782|gb|EKC43144.1| Nucleoside diphosphate kinase B [Crassostrea gigas]	983.425	984.082	107	115	GDYGIDMGR	0.735379	9
>tr|A0A7E6F497|A0A7E6F497_OCTVU ATP-citrate synthase OS=Octopus vulgaris OX=6645 GN=LOC115216353 PE=3 SV=1	1169.53	1170.4	217	226	IDQCAEFLCK	0.735291	10
>tr|A0A6P7TGU1|A0A6P7TGU1_OCTVU actin-interacting protein 1 isoform X1 OS=Octopus vulgaris OX=6645 GN=LOC115223147 PE=4 SV=1	3386.74	3388.99	276	305	TLDDMLVSCIWIGNNIITISLSGFITYLDR	0.735234	30
>tr|A0A0L8H0K9|A0A0L8H0K9_OCTBM Proteasome subunit alpha type OS=Octopus bimaculoides OX=37653 GN=OCBIM_22024847mg PE=3 SV=1	880.471	881.091	83	89	LISNFMR	0.735224	7
>tr|A0A0L8I420|A0A0L8I420_OCTBM Uncharacterized protein (Fragment) OS=Octopus bimaculoides OX=37653 GN=OCBIM_22037121mg PE=3 SV=1	1696.84	1698.01	128	141	ICEPYITWGYPNLK	0.735055	14
>tr|A0A6P7TRF4|A0A6P7TRF4_OCTVU catalase OS=Octopus vulgaris OX=6645 GN=LOC115228352 PE=3 SV=1	1647.9	1648.96	299	312	IWPHSEFPLIPVGR	0.734471	14
>Cluster-58773.74875;orf1 len=741 frame:2 start:1832 end:4054 gi|159006|gb|AAA16244.1| peroxidase-like protein, partial [Euprymna scolopes]	1729.86	1730.97	175	188	FQTPEYFDGLFLPR	0.733753	14
>tr|A0A6P7TBG1|A0A6P7TBG1_OCTVU uridine phosphorylase 1 OS=Octopus vulgaris OX=6645 GN=LOC115220972 PE=3 SV=1	1471.78	1472.8	274	284	RPIQIFFEYMK	0.733538	11
>tr|A0A812EMG1|A0A812EMG1_SEPPH DNAH OS=Sepia pharaonis OX=158019 GN=SPHA_78697 PE=4 SV=1	2127.16	2128.62	470	489	MSLGIPEQCNLGLLLIDAVK	0.733531	20
>tr|A0A6P7SAW7|A0A6P7SAW7_OCTVU transketolase OS=Octopus vulgaris OX=6645 GN=LOC115210747 PE=4 SV=1	1602.83	1603.94	387	400	TIPFISTFACFLSR	0.733082	14
>tr|A0A812CYT6|A0A812CYT6_SEPPH MYH OS=Sepia pharaonis OX=158019 GN=SPHA_42230 PE=3 SV=1	1909.01	1910.23	428	445	QGASFIGILDIAGFEIFK	0.732877	18
>Cluster-141421.4;orf1 len=365 frame:2 start:2 end:1096 gi|470476037|ref|XP_004342217.1| hypothetical protein ACA1_115170 [Acanthamoeba castellanii str. Neff]>gi|440799046|gb|ELR20107.1| hypothetical protein ACA1_115170 [Acanthamoeba castellanii str. Neff]	1548.62	1549.63	214	226	SDFYDAHFSSCNR	0.732833	13
>tr|A0A6P7SWF0|A0A6P7SWF0_OCTVU probable methylmalonate-semialdehyde dehydrogenase [acylating], mitochondrial OS=Octopus vulgaris OX=6645 GN=LOC115217127 PE=3 SV=1	952.427	953.008	493	500	GDTHFYGR	0.73265	8
>tr|F0V3W2|F0V3W2_LEPCI Hemocyanin (Fragment) OS=Lepidochitona cinerea OX=256056 PE=2 SV=1	1079.49	1080.21	678	686	SINGDWMTR	0.731929	9
>tr|A0A6P7TRC4|A0A6P7TRC4_OCTVU myosin heavy chain, striated muscle OS=Octopus vulgaris OX=6645 GN=LOC115225111 PE=3 SV=2	1626.93	1627.94	580	594	QPGLIDAALVLHQLR	0.731875	15
>tr|A0A6P7SA56|A0A6P7SA56_OCTVU cathepsin B OS=Octopus vulgaris OX=6645 GN=LOC115210644 PE=3 SV=1	1980.89	1982.33	183	200	MGCQPYQIPACDHHVPGK	0.731485	18
>tr|A0A7E6EZI8|A0A7E6EZI8_OCTVU uncharacterized protein LOC115214248 OS=Octopus vulgaris OX=6645 GN=LOC115214248 PE=4 SV=1	1019.55	1020.18	2538	2546	SPEISFALR	0.731388	9
>tr|A0A7E6EZI8|A0A7E6EZI8_OCTVU uncharacterized protein LOC115214248 OS=Octopus vulgaris OX=6645 GN=LOC115214248 PE=4 SV=1	1108.55	1109.3	5530	5539	GGIMSPDYLR	0.730491	10
>tr|A0A6P7SER3|A0A6P7SER3_OCTVU hemocyanin 1-like OS=Octopus vulgaris OX=6645 GN=LOC115212215 PE=4 SV=2	2364.03	2365.69	3153	3174	GLDGSANCGLNMFHNPMEPFGR	0.730483	22
>tr|A0A6P7S7P4|A0A6P7S7P4_OCTVU Peroxiredoxin-5 OS=Octopus vulgaris OX=6645 GN=LOC115209798 PE=3 SV=1	1777.9	1779.14	67	83	GIASINCVAVNDPFVMK	0.730135	17
>tr|A0A7E6EZ05|A0A7E6EZ05_OCTVU Vinculin OS=Octopus vulgaris OX=6645 GN=LOC115214348 PE=3 SV=1	917.448	918.003	96	104	GDPFSAPAR	0.730048	9
>Cluster-58773.198809;orf1 len=296 frame:2 start:149 end:1036 gi|871209239|ref|XP_012941697.1| PREDICTED: carbonic anhydrase 1-like [Aplysia californica] >Cluster-58773.198805;orf1 len=296 frame:-3 start:932 end:45 gi|871209239|ref|XP_012941697.1| PREDICTED: carbonic anhydrase 1-like [Aplysia californica] >Cluster-58773.198810;orf1 len=296 frame:2 start:251 end:1138 gi|871209239|ref|XP_012941697.…	1158.48	1159.34	38	47	NMCAGTWGYR	0.729492	10
>tr|A0A0L8IDH2|A0A0L8IDH2_OCTBM Non-specific serine/threonine protein kinase OS=Octopus bimaculoides OX=37653 GN=OCBIM_22020713mg PE=3 SV=1	1259.64	1260.44	146	156	ISDFGFATVFR	0.729364	11
>tr|A0A6P7S854|A0A6P7S854_OCTVU neuroglian isoform X1 OS=Octopus vulgaris OX=6645 GN=LOC115210201 PE=4 SV=1	1143.63	1144.43	356	364	ELARPIWMK	0.728194	9
>tr|A0A7E6FNE1|A0A7E6FNE1_OCTVU dystrophin isoform X4 OS=Octopus vulgaris OX=6645 GN=LOC115232614 PE=4 SV=1	1143.55	1144.28	578	586	WQFYSDGLK	0.728185	9
>tr|A0A7E6F497|A0A7E6F497_OCTVU ATP-citrate synthase OS=Octopus vulgaris OX=6645 GN=LOC115216353 PE=3 SV=1	2843.35	2845.38	875	901	FIEMCLMVTADHGPAVSGAHNAIVCTR	0.728027	27
>tr|Q24925|Q24925_EUPSC Peroxidase-like protein (Fragment) OS=Euprymna scolopes OX=6613 PE=2 SV=1	1342.71	1343.6	429	442	SLASPALTCGLGPR	0.727923	14
>tr|A0A6P7SI10|A0A6P7SI10_OCTVU CD109 antigen isoform X2 OS=Octopus vulgaris OX=6645 GN=LOC115213260 PE=4 SV=1	3485.8	3488.13	5	35	LAILWALSMALFANVQGDEIDEGHYMILVPR	0.727742	31
>Cluster-58773.130155;orf1 len=534 frame:1 start:1 end:1602 gi|871256270|ref|XP_012942267.1| PREDICTED: mucin-3A-like [Aplysia californica]	1342.6	1343.7	343	354	CINNMCSLICTK	0.726941	12
>tr|A0A6P7T0G1|A0A6P7T0G1_OCTVU Phosphoglycerate kinase OS=Octopus vulgaris OX=6645 GN=LOC115218470 PE=3 SV=1	1711.93	1713.17	229	244	VNLMIIGGGMAFTFLK	0.72686	16
>tr|A0A812EMG1|A0A812EMG1_SEPPH DNAH OS=Sepia pharaonis OX=158019 GN=SPHA_78697 PE=4 SV=1	3072.56	3074.51	428	455	HLQGLVAEIQEALLSAFNAANQYAMDVR	0.726705	28
>tr|A0A6P7SQT5|A0A6P7SQT5_OCTVU cathepsin L1-like OS=Octopus vulgaris OX=6645 GN=LOC115215560 PE=3 SV=1	1077.51	1078.18	301	310	NSWGGSWGVK	0.72665	10
>tr|A0A6P7SI10|A0A6P7SI10_OCTVU CD109 antigen isoform X2 OS=Octopus vulgaris OX=6645 GN=LOC115213260 PE=4 SV=1	1250.69	1251.48	977	987	GSTWLTAFVLR	0.726012	11
>tr|A0A0L8GIJ0|A0A0L8GIJ0_OCTBM VWFA domain-containing protein (Fragment) OS=Octopus bimaculoides OX=37653 GN=OCBIM_22032938mg PE=4 SV=1	1111.46	1112.22	181	189	SDFCEAHFR	0.725998	9
>tr|A0A7E6ESL5|A0A7E6ESL5_OCTVU prominin-1-A isoform X4 OS=Octopus vulgaris OX=6645 GN=LOC115210705 PE=3 SV=1	3010.58	3012.37	263	290	NSVSNLSHSLNNLTVLGQTLESNLTNIK	0.725764	28
>tr|A0A077B6R8|A0A077B6R8_EUPSC Hemocyanin subunit 1 OS=Euprymna scolopes OX=6613 GN=HCY1 PE=2 SV=1	2290.1	2291.61	2857	2876	DAGVLFILGGETEMPWHFDR	0.725394	20
>tr|A0A6P7UBL9|A0A6P7UBL9_OCTVU fatty-acid amide hydrolase 2 isoform X2 OS=Octopus vulgaris OX=6645 GN=LOC115232529 PE=3 SV=1	1146.53	1147.35	352	360	YSFEIWCAK	0.72495	9
>Cluster-58773.83035;orf1 len=470 frame:3 start:477 end:1886 gi|554820859|ref|XP_005921157.1| PREDICTED: thymidine phosphorylase-like isoform X1 [Haplochromis burtoni]	1469.68	1470.72	372	385	DGYIQAIDALCCGK	0.724776	14
>tr|A0A6P7T9M7|A0A6P7T9M7_OCTVU Transgelin OS=Octopus vulgaris OX=6645 GN=LOC115221527 PE=3 SV=1	1341.6	1342.55	263	276	CASQAGMSGFGAVR	0.7245	14
>tr|A0A0L8G235|A0A0L8G235_OCTBM Malate dehydrogenase OS=Octopus bimaculoides OX=37653 GN=OCBIM_22001700mg PE=3 SV=1	872.491	873.109	59	66	DCALPLLK	0.723751	8
>tr|A0A6P7TFA3|A0A6P7TFA3_OCTVU Polyol dehydrogenase OS=Octopus vulgaris OX=6645 GN=LOC115223465 PE=3 SV=1	1587.77	1588.79	238	253	SPDISLECSGNPAGLK	0.72349	16
>tr|A0A6P7S644|A0A6P7S644_OCTVU Proteasome subunit beta OS=Octopus vulgaris OX=6645 GN=LOC115209401 PE=3 SV=1	1167.46	1168.41	71	79	MTDYIYCCR	0.723016	9
>tr|A0A6P7U678|A0A6P7U678_OCTVU collagen alpha-4(VI) chain OS=Octopus vulgaris OX=6645 GN=LOC115232146 PE=4 SV=2	823.508	824.06	389	395	VAVFFLK	0.722785	7
>tr|A0A0L8HJ80|A0A0L8HJ80_OCTBM Major vault protein OS=Octopus bimaculoides OX=37653 GN=OCBIM_22013292mg PE=4 SV=1	808.362	808.874	597	602	FDDFHK	0.721619	6
>tr|A0A7E6FE51|A0A7E6FE51_OCTVU filamin-A isoform X1 OS=Octopus vulgaris OX=6645 GN=LOC115220251 PE=3 SV=1	1161.69	1162.39	264	273	LNPQAPLRPR	0.721504	10
>tr|A0A6P7SXS2|A0A6P7SXS2_OCTVU cell surface glycoprotein 1 isoform X6 OS=Octopus vulgaris OX=6645 GN=LOC115217577 PE=4 SV=1	2550.13	2551.62	218	241	SDSASPTERPASPTPASDEEPHER	0.721259	24
>tr|A0A6P7TBG1|A0A6P7TBG1_OCTVU uridine phosphorylase 1 OS=Octopus vulgaris OX=6645 GN=LOC115220972 PE=3 SV=1	1612.79	1613.89	106	119	LLFHAGCSDVTFFR	0.721219	14
>tr|A0A6P7SJH5|A0A6P7SJH5_OCTVU cytosolic non-specific dipeptidase OS=Octopus vulgaris OX=6645 GN=LOC115213824 PE=3 SV=1	1164.62	1165.41	199	208	NKPCLTYGLR	0.72069	10
>tr|A0A6P7TEC1|A0A6P7TEC1_OCTVU spermidine synthase OS=Octopus vulgaris OX=6645 GN=LOC115222533 PE=3 SV=1	1027.53	1028.27	35	42	FQDIMVFK	0.720543	8
>tr|A0A6P7S5H1|A0A6P7S5H1_OCTVU Mannose-6-phosphate isomerase OS=Octopus vulgaris OX=6645 GN=LOC115209304 PE=3 SV=1	1167.56	1168.37	12	21	CAVQNYVWGK	0.720385	10
>tr|A0A0L8G235|A0A0L8G235_OCTBM Malate dehydrogenase OS=Octopus bimaculoides OX=37653 GN=OCBIM_22001700mg PE=3 SV=1	1661.86	1662.9	143	157	YAPSIPPQNFSALTR	0.719846	15
>tr|A0A7E6FRZ6|A0A7E6FRZ6_OCTVU hemocyanin G-type, units Oda to Odg-like OS=Octopus vulgaris OX=6645 GN=LOC115225590 PE=4 SV=1	1201.71	1202.49	1581	1591	VFAAFLLHGVK	0.719754	11
>tr|A0A812CTD3|A0A812CTD3_SEPPH Hypothetical protein OS=Sepia pharaonis OX=158019 GN=SPHA_40360 PE=4 SV=1	1899.96	1901.14	175	191	QPASLIWSDANIIDAFR	0.719348	17
>tr|A0A812CBN1|A0A812CBN1_SEPPH Uncharacterized protein OS=Sepia pharaonis OX=158019 GN=SPHA_33848 PE=4 SV=1	1073.51	1074.25	468	477	WCPSPDAAVK	0.719331	10
>tr|A0A812CD65|A0A812CD65_SEPPH Uncharacterized protein OS=Sepia pharaonis OX=158019 GN=SPHA_33819 PE=4 SV=1	1073.51	1074.25	910	919	WCPSPDAAVK	0.719331	10
>Cluster-58773.104902;orf1 len=592 frame:3 start:618 end:2393 gi|524870221|ref|XP_005091896.1| PREDICTED: xaa-Pro dipeptidase-like [Aplysia californica]	2033.11	2034.44	572	590	SRPEPTLPLPSEIPCIVGK	0.718999	19
>tr|A0A812BBI7|A0A812BBI7_SEPPH Annexin OS=Sepia pharaonis OX=158019 GN=SPHA_13606 PE=3 SV=1	2045.98	2047.31	67	85	SELGGDFEDVCLALLDPPR	0.718159	19
>tr|A0A6P7T1G4|A0A6P7T1G4_OCTVU uncharacterized protein LOC115218491 OS=Octopus vulgaris OX=6645 GN=LOC115218491 PE=4 SV=1	1721.97	1723.21	3	18	LSIAFVLLCLSLCQAK	0.71802	16
>tr|A0A7E6FRZ6|A0A7E6FRZ6_OCTVU hemocyanin G-type, units Oda to Odg-like OS=Octopus vulgaris OX=6645 GN=LOC115225590 PE=4 SV=1	1911.96	1913.28	260	276	INCGLNLLHTPMEPFGR	0.717915	17
>tr|A0A6P7STJ4|A0A6P7STJ4_OCTVU Carboxylic ester hydrolase OS=Octopus vulgaris OX=6645 GN=LOC115216415 PE=3 SV=1	3056.48	3058.42	123	151	SHSNLATMIWIYGGALVSGTSTLDAYDGR	0.717335	29
>Cluster-58773.148525;orf1 len=812 frame:2 start:422 end:2857 gi|676447145|ref|XP_009051312.1| hypothetical protein LOTGIDRAFT_201834 [Lottia gigantea]>gi|556109335|gb|ESO97987.1| hypothetical protein LOTGIDRAFT_201834 [Lottia gigantea]	834.418	835.019	327	333	AWDICVK	0.716707	7
>tr|A0A6P7U2G4|A0A6P7U2G4_OCTVU uncharacterized protein LOC115232424 OS=Octopus vulgaris OX=6645 GN=LOC115232424 PE=4 SV=1	1259.57	1260.42	237	248	QEPGACYLPNGK	0.716097	12
>tr|A0A6P7U0P7|A0A6P7U0P7_OCTVU zinc finger ZZ-type and EF-hand domain-containing protein 1 OS=Octopus vulgaris OX=6645 GN=LOC115228010 PE=4 SV=1	1773.96	1775.13	460	475	VVPADLDILLSFNMAR	0.715715	16
>tr|A0A6P7U0P7|A0A6P7U0P7_OCTVU zinc finger ZZ-type and EF-hand domain-containing protein 1 OS=Octopus vulgaris OX=6645 GN=LOC115228010 PE=4 SV=1	2151.14	2152.57	1170	1188	GSADTILTWPYDMLLLLTK	0.715259	19
>tr|A0A0L8G0V9|A0A0L8G0V9_OCTBM Uncharacterized protein OS=Octopus bimaculoides OX=37653 GN=OCBIM_22003270mg PE=3 SV=1	2138.34	2139.68	3	23	SILPVLLVVVTITTSVIAATK	0.715217	21
>tr|A0A7E6FE51|A0A7E6FE51_OCTVU filamin-A isoform X1 OS=Octopus vulgaris OX=6645 GN=LOC115220251 PE=3 SV=1	1661.84	1662.96	1320	1334	SPFNMPVKPGFDPTK	0.714343	15
>tr|A0A6P7SI10|A0A6P7SI10_OCTVU CD109 antigen isoform X2 OS=Octopus vulgaris OX=6645 GN=LOC115213260 PE=4 SV=1	1730.87	1732.03	720	736	WVANGFSVGPNGVAPMK	0.71412	17
>tr|A0A7E6EY74|A0A7E6EY74_OCTVU twitchin OS=Octopus vulgaris OX=6645 GN=LOC115213975 PE=3 SV=1	839.389	839.885	1048	1054	DSSLDFR	0.71379	7
>tr|A0A6P7SGA6|A0A6P7SGA6_OCTVU Clathrin heavy chain OS=Octopus vulgaris OX=6645 GN=LOC115212844 PE=3 SV=1	1169.66	1170.4	953	962	DPDLWAIVLK	0.71372	10
>tr|A0A812DGV9|A0A812DGV9_SEPPH AIFM3 OS=Sepia pharaonis OX=158019 GN=SPHA_53448 PE=4 SV=1	839.503	840.06	528	534	IATFFIK	0.713626	7
>tr|A0A7E6FT44|A0A7E6FT44_OCTVU 4-hydroxyphenylpyruvate dioxygenase OS=Octopus vulgaris OX=6645 GN=LOC115226087 PE=3 SV=1	1446.86	1447.77	168	180	DPLLPNLPVIDLK	0.713293	13
>tr|A0A0L8FMS3|A0A0L8FMS3_OCTBM VWFC domain-containing protein OS=Octopus bimaculoides OX=37653 GN=OCBIM_22013879mg PE=4 SV=1	1454.68	1455.75	924	935	CNTTCLEPFIWK	0.712827	12
>tr|A0A7E6EW98|A0A7E6EW98_OCTVU 10-formyltetrahydrofolate dehydrogenase OS=Octopus vulgaris OX=6645 GN=LOC115216749 PE=3 SV=1	989.419	990.132	530	537	YFAGWCDK	0.711468	8
>tr|A0A0L8I519|A0A0L8I519_OCTBM Sulfotransfer_1 domain-containing protein OS=Octopus bimaculoides OX=37653 GN=OCBIM_22034539mg PE=4 SV=1	1046.48	1047.16	185	192	VPYDDYFK	0.711354	8
>tr|A0A6P7SYN9|A0A6P7SYN9_OCTVU barrier-to-autointegration factor B OS=Octopus vulgaris OX=6645 GN=LOC115217368 PE=4 SV=1	914.371	915.018	83	89	TWCDNYL	0.711239	7
>tr|A0A7E6EY74|A0A7E6EY74_OCTVU twitchin OS=Octopus vulgaris OX=6645 GN=LOC115213975 PE=3 SV=1	1886.04	1887.31	2580	2596	LAIPFTGVPKPTATWMR	0.71122	17
>tr|A0A7E6EHE9|A0A7E6EHE9_OCTVU prosaposin isoform X1 OS=Octopus vulgaris OX=6645 GN=LOC115209891 PE=4 SV=1	1748.86	1750.06	567	582	ELNPDILCSSLNVCTK	0.711219	16
>tr|A0A0L8HB35|A0A0L8HB35_OCTBM CCT-beta OS=Octopus bimaculoides OX=37653 GN=OCBIM_22018710mg PE=3 SV=1	1507.79	1508.79	364	378	FSGVALGEACSVVLR	0.711063	15
>tr|A0A6P7SYF3|A0A6P7SYF3_OCTVU retinal dehydrogenase 1 OS=Octopus vulgaris OX=6645 GN=LOC115217862 PE=3 SV=1	3295.56	3297.76	435	465	AMTFTSAVQAGTVWVNTYNSVCPQSPFGGFK	0.710682	31
>tr|A0A6P7SA56|A0A6P7SA56_OCTVU cathepsin B OS=Octopus vulgaris OX=6645 GN=LOC115210644 PE=3 SV=1	1201.57	1202.38	95	104	QQWPSCQTLK	0.710433	10
>tr|A0A7E6EY74|A0A7E6EY74_OCTVU twitchin OS=Octopus vulgaris OX=6645 GN=LOC115213975 PE=3 SV=1	1501.73	1502.75	4267	4279	YADWPQPMPAIGR	0.710431	13
>tr|A0A6P7TRC4|A0A6P7TRC4_OCTVU myosin heavy chain, striated muscle OS=Octopus vulgaris OX=6645 GN=LOC115225111 PE=3 SV=2	937.496	938.187	336	342	MFNWLVK	0.709899	7
>tr|A0A6P7SYF5|A0A6P7SYF5_OCTVU retinal dehydrogenase 2 OS=Octopus vulgaris OX=6645 GN=LOC115217865 PE=3 SV=1	3561.54	3564.14	270	304	SPCVIFADADLDSAVATAHEAAMICMGQCCFAGSR	0.709625	35
>tr|A0A7E6EY74|A0A7E6EY74_OCTVU twitchin OS=Octopus vulgaris OX=6645 GN=LOC115213975 PE=3 SV=1	1395.72	1396.59	2781	2793	DGGSPLFGYIIEK	0.709107	13
>tr|A0A7E6EHE9|A0A7E6EHE9_OCTVU prosaposin isoform X1 OS=Octopus vulgaris OX=6645 GN=LOC115209891 PE=4 SV=1	1175.43	1176.27	591	601	SDDPGCSYCTK	0.708915	11
>tr|A0A077B6R8|A0A077B6R8_EUPSC Hemocyanin subunit 1 OS=Euprymna scolopes OX=6613 GN=HCY1 PE=2 SV=1	929.545	930.142	1815	1822	TLPNPFLK	0.708779	8
>tr|A0A6P7SJ72|A0A6P7SJ72_OCTVU Glutamine--fructose-6-phosphate transaminase (isomerizing) OS=Octopus vulgaris OX=6645 GN=LOC115213781 PE=4 SV=1	897.577	898.14	200	208	GSPLLIGIK	0.708663	9
>tr|A0A7E6FD92|A0A7E6FD92_OCTVU insulin-degrading enzyme OS=Octopus vulgaris OX=6645 GN=LOC115219912 PE=3 SV=1	1767.89	1768.98	289	304	SNPGFYLAHLLGHEGR	0.708552	16
>tr|A0A7E6FNE1|A0A7E6FNE1_OCTVU dystrophin isoform X4 OS=Octopus vulgaris OX=6645 GN=LOC115232614 PE=4 SV=1	873.392	874.012	2195	2201	QFHCDLK	0.708416	7
>tr|A0A6P7TRC4|A0A6P7TRC4_OCTVU myosin heavy chain, striated muscle OS=Octopus vulgaris OX=6645 GN=LOC115225111 PE=3 SV=2	942.468	943.053	1375	1382	GYSAELFR	0.708246	8
>tr|A0A6P7SE31|A0A6P7SE31_OCTVU 26S proteasome non-ATPase regulatory subunit 2 OS=Octopus vulgaris OX=6645 GN=LOC115211842 PE=3 SV=1	950.476	951.139	276	283	QLSYMLGR	0.707845	8
>tr|A0A6P7TXK0|A0A6P7TXK0_OCTVU medium-chain specific acyl-CoA dehydrogenase, mitochondrial OS=Octopus vulgaris OX=6645 GN=LOC115228127 PE=3 SV=1	2584.18	2586.06	141	165	MLEEPLMCAYCVTEPGAGSDVAGIK	0.707067	25
>tr|A0A7E6FDU1|A0A7E6FDU1_OCTVU Glucose-6-phosphate 1-dehydrogenase OS=Octopus vulgaris OX=6645 GN=LOC115220357 PE=3 SV=1	1212.6	1213.34	249	259	GGYFDQSGIIR	0.706248	11
>tr|A0A6P7TEG5|A0A6P7TEG5_OCTVU Alpha-L-fucosidase OS=Octopus vulgaris OX=6645 GN=LOC115223232 PE=3 SV=1	3814.87	3817.36	306	340	YSDYYTIEGLISLLVETISCGGNLLMNIGPTHDGR	0.70578	35
>tr|A0A7E6FQN6|A0A7E6FQN6_OCTVU insulin-like growth factor-binding protein complex acid labile subunit isoform X7 OS=Octopus vulgaris OX=6645 GN=LOC115225305 PE=4 SV=1	1881.84	1883.29	380	395	DMMCECHLPAILNYTK	0.705488	16
>tr|A0A0L8G8E4|A0A0L8G8E4_OCTBM TGc domain-containing protein OS=Octopus bimaculoides OX=37653 GN=OCBIM_22038334mg PE=3 SV=1	1267.7	1268.51	521	532	AIFGNSFTIGLK	0.705487	12
>Cluster-58773.147322;orf1 len=499 frame:3 start:3 end:1499 gi|676461383|ref|XP_009055926.1| hypothetical protein LOTGIDRAFT_161773 [Lottia gigantea]>gi|556104570|gb|ESO93222.1| hypothetical protein LOTGIDRAFT_161773 [Lottia gigantea]	804.447	804.933	209	215	HGQPIPR	0.705381	7
>Cluster-58773.93343;orf1 len=501 frame:1 start:1 end:1503 gi|762076444|ref|XP_011445523.1| PREDICTED: xylose isomerase-like [Crassostrea gigas] >Cluster-58773.93344;orf1 len=501 frame:1 start:1 end:1503 gi|762076444|ref|XP_011445523.1| PREDICTED: xylose isomerase-like [Crassostrea gigas]	1541.8	1542.86	197	209	LLWATCNLFAHPR	0.704018	13
>tr|A0A7E6EK24|A0A7E6EK24_OCTVU deoxynucleoside triphosphate triphosphohydrolase SAMHD1-like OS=Octopus vulgaris OX=6645 GN=LOC115231394 PE=4 SV=1	973.51	974.111	200	208	DSHFLGIGK	0.703644	9
>tr|A0A6P7T9M7|A0A6P7T9M7_OCTVU Transgelin OS=Octopus vulgaris OX=6645 GN=LOC115221527 PE=3 SV=1	1403.7	1404.64	146	159	GFSGPVCGPKPTEK	0.702755	14
>tr|A0A0L8GMT0|A0A0L8GMT0_OCTBM PKS_ER domain-containing protein OS=Octopus bimaculoides OX=37653 GN=OCBIM_22031489mg PE=4 SV=1	951.541	952.151	305	312	FLAGFQLR	0.702001	8
>tr|A0A6P7T033|A0A6P7T033_OCTVU T-complex protein 1 subunit gamma OS=Octopus vulgaris OX=6645 GN=LOC115218091 PE=3 SV=1	1972.02	1973.38	206	224	IPGGCIEDSCVLQGILLNK	0.701612	19
>tr|A0A6P7S7T5|A0A6P7S7T5_OCTVU acid ceramidase-like OS=Octopus vulgaris OX=6645 GN=LOC115209837 PE=3 SV=1	2406.44	2408	5	26	IITILIFVTVVSGFVLKPFDGK	0.701492	22
>tr|A0A7E6FD92|A0A7E6FD92_OCTVU insulin-degrading enzyme OS=Octopus vulgaris OX=6645 GN=LOC115219912 PE=3 SV=1	1133.56	1134.28	365	373	EGPQEWIFK	0.701123	9
>tr|A0A6P7U7W9|A0A6P7U7W9_OCTVU putative aminopeptidase W07G4.4 isoform X1 OS=Octopus vulgaris OX=6645 GN=LOC115232621 PE=3 SV=1	1024.46	1025.21	280	289	AGGHMAGMHR	0.700797	10
>tr|A0A6P7TD81|A0A6P7TD81_OCTVU dipeptidyl peptidase 2 isoform X1 OS=Octopus vulgaris OX=6645 GN=LOC115222860 PE=3 SV=1	1975.99	1977.3	165	183	SPVISFGGSYGGMLTAYLR	0.700458	19
>tr|A0A812CD65|A0A812CD65_SEPPH Uncharacterized protein OS=Sepia pharaonis OX=158019 GN=SPHA_33819 PE=4 SV=1	1927.93	1929.11	980	998	GEAHPNPFFSGAIDGVNAK	0.700157	19
>tr|A0A6P7TS50|A0A6P7TS50_OCTVU Glutamate--cysteine ligase OS=Octopus vulgaris OX=6645 GN=LOC115225878 PE=3 SV=2	985.619	986.253	179	186	LPLFLNIR	0.700057	8
>tr|A0A7E6EUU3|A0A7E6EUU3_OCTVU apoptosis-inducing factor 3 isoform X1 OS=Octopus vulgaris OX=6645 GN=LOC115213836 PE=4 SV=1	1817.92	1819.1	327	342	SLEIPGNDLQNVCFLR	0.699932	16
>Cluster-58773.152500;orf1 len=343 frame:3 start:201 end:1229 gi|762111820|ref|XP_011438633.1| PREDICTED: adenosine deaminase-like [Crassostrea gigas]>gi|762111822|ref|XP_011438634.1| PREDICTED: adenosine deaminase-like [Crassostrea gigas]>gi|762111824|ref|XP_011438635.1| PREDICTED: adenosine deaminase-like [Crassostrea gigas]>gi|762111826|ref|XP_011438636.1| PREDICTED: adenosine deaminase-like […	2111.12	2112.55	57	75	NEGLGAMLDIFGYFLPIIK	0.699719	19
>Cluster-58773.136028;orf1 len=262 frame:2 start:116 end:901 gi|291233326|ref|XP_002736601.1| PREDICTED: UPF0462 protein C4orf33 homolog [Saccoglossus kowalevskii]	1106.62	1107.35	209	218	IYSALFPAPK	0.699529	10
>tr|A0A6P7SB76|A0A6P7SB76_OCTVU epidermal retinol dehydrogenase 2 isoform X1 OS=Octopus vulgaris OX=6645 GN=LOC115210961 PE=3 SV=1	922.467	923.063	1	8	MIDWDFVK	0.698683	8
>tr|A0A812CYT6|A0A812CYT6_SEPPH MYH OS=Sepia pharaonis OX=158019 GN=SPHA_42230 PE=3 SV=1	938.473	939.065	538	544	FEKPDFR	0.698134	7
>tr|A0A6P7TFA3|A0A6P7TFA3_OCTVU Polyol dehydrogenase OS=Octopus vulgaris OX=6645 GN=LOC115223465 PE=3 SV=1	1369.7	1370.63	114	126	FCATPPVHGTLAR	0.697861	13
>tr|A0A077B6R8|A0A077B6R8_EUPSC Hemocyanin subunit 1 OS=Euprymna scolopes OX=6613 GN=HCY1 PE=2 SV=1	1626.85	1627.9	2743	2754	LWAIWQELQHFR	0.697565	12
>tr|A0A6P7TEG5|A0A6P7TEG5_OCTVU Alpha-L-fucosidase OS=Octopus vulgaris OX=6645 GN=LOC115223232 PE=3 SV=1	1084.48	1085.17	143	150	YSWNWNSK	0.697371	8
>tr|Q27Q56|Q27Q56_SEPOF Hemocyanin subunit 2 (Fragment) OS=Sepia officinalis OX=6610 PE=2 SV=1	2645.3	2647.07	1902	1924	LDYNVANCALHLLSDPMRPFNNK	0.697146	23
>tr|A0A6P7SQQ6|A0A6P7SQQ6_OCTVU cathepsin L1 OS=Octopus vulgaris OX=6645 GN=LOC115215566 PE=3 SV=1	2898.47	2900.39	3	29	TAIIFLACAAFAVAAPFLDNSLDETWK	0.696177	27
>tr|A0A6P7SYQ3|A0A6P7SYQ3_OCTVU pancreatic triacylglycerol lipase-like OS=Octopus vulgaris OX=6645 GN=LOC115217380 PE=3 SV=1	1259.66	1260.51	106	115	DKPWVLNMTR	0.696058	10
>tr|A0A6P7SJ72|A0A6P7SJ72_OCTVU Glutamine--fructose-6-phosphate transaminase (isomerizing) OS=Octopus vulgaris OX=6645 GN=LOC115213781 PE=4 SV=1	1045.48	1046.2	325	333	GNFSSFMQK	0.695718	9
>tr|W6CNR9|W6CNR9_SEPOF Hemocyanin subunit 3 OS=Sepia officinalis OX=6610 PE=2 SV=1	2277.12	2278.59	1364	1383	GSGVAVPYWDWIEPFDTLPK	0.694695	20
>tr|A0A7E6FRZ6|A0A7E6FRZ6_OCTVU hemocyanin G-type, units Oda to Odg-like OS=Octopus vulgaris OX=6645 GN=LOC115225590 PE=4 SV=1	827.368	827.877	860	865	FDENFR	0.694442	6
>tr|A0A6P7SRB2|A0A6P7SRB2_OCTVU acidic mammalian chitinase isoform X1 OS=Octopus vulgaris OX=6645 GN=LOC115215700 PE=3 SV=1	1744.73	1745.88	195	209	GFDGLDMDWEYPGSR	0.694237	15
>tr|A0A7E6EU42|A0A7E6EU42_OCTVU rho GDP-dissociation inhibitor 1 isoform X1 OS=Octopus vulgaris OX=6645 GN=LOC115211966 PE=3 SV=1	2494.13	2495.96	9	28	IFYCFWKPWMAETEESCVPK	0.693237	20
>tr|A0A6P7TUI8|A0A6P7TUI8_OCTVU uncharacterized protein LOC115225721 OS=Octopus vulgaris OX=6645 GN=LOC115225721 PE=3 SV=1	1436.62	1437.64	202	214	SGYSCPNTTYCLK	0.692909	13
>tr|A0A6P7SU25|A0A6P7SU25_OCTVU Glucose-6-phosphate isomerase OS=Octopus vulgaris OX=6645 GN=LOC115216343 PE=3 SV=1	1217.55	1218.39	319	328	GAHFMDQHFK	0.692895	10
>Cluster-58773.155745;orf1 len=271 frame:1 start:403 end:1215 gi|443706878|gb|ELU02754.1| hypothetical protein CAPTEDRAFT_117881, partial [Capitella teleta]	1195.63	1196.53	181	191	QPAVVMMLPAR	0.691667	11
>tr|A0A6P7T7N8|A0A6P7T7N8_OCTVU dihydropteridine reductase OS=Octopus vulgaris OX=6645 GN=LOC115219744 PE=4 SV=1	1817.89	1819.06	73	91	LDAILCVAGGWAGGNADSK	0.691617	19
>tr|Q27Q56|Q27Q56_SEPOF Hemocyanin subunit 2 (Fragment) OS=Sepia officinalis OX=6610 PE=2 SV=1	1856.85	1858.09	1182	1197	AGEFYVLGSENEMPWK	0.690905	16
>tr|A0A812CBN1|A0A812CBN1_SEPPH Uncharacterized protein OS=Sepia pharaonis OX=158019 GN=SPHA_33848 PE=4 SV=1	1856.85	1858.09	758	773	AGEFYVLGSENEMPWK	0.690905	16
>tr|A0A077B6R8|A0A077B6R8_EUPSC Hemocyanin subunit 1 OS=Euprymna scolopes OX=6613 GN=HCY1 PE=2 SV=1	1856.85	1858.09	1200	1215	AGEFYVLGSENEMPWK	0.690905	16
>tr|W6CNR9|W6CNR9_SEPOF Hemocyanin subunit 3 OS=Sepia officinalis OX=6610 PE=2 SV=1	1856.85	1858.09	1198	1213	AGEFYVLGSENEMPWK	0.690905	16
>tr|A0A7E6FRZ6|A0A7E6FRZ6_OCTVU hemocyanin G-type, units Oda to Odg-like OS=Octopus vulgaris OX=6645 GN=LOC115225590 PE=4 SV=1	1856.85	1858.09	1199	1214	AGEFYVLGSENEMPWK	0.690905	16
>tr|A0A6P7SVJ8|A0A6P7SVJ8_OCTVU Arginase OS=Octopus vulgaris OX=6645 GN=LOC115216860 PE=3 SV=1	1011.55	1012.2	356	364	DFALTIFGK	0.690484	9
>tr|A0A6P7SYD8|A0A6P7SYD8_OCTVU neutral protease isoform X1 OS=Octopus vulgaris OX=6645 GN=LOC115217300 PE=3 SV=1	1041.53	1042.18	137	145	SDVFDIAFK	0.690367	9
>tr|A0A6P7TPR7|A0A6P7TPR7_OCTVU uncharacterized protein LOC115224696 OS=Octopus vulgaris OX=6645 GN=LOC115224696 PE=4 SV=2	1516.72	1517.69	176	188	AAPHYYANFTFSK	0.690057	13
>tr|A0A812CD65|A0A812CD65_SEPPH Uncharacterized protein OS=Sepia pharaonis OX=158019 GN=SPHA_33819 PE=4 SV=1	1008.54	1009.2	2477	2484	IPFEDLFK	0.689738	8
>tr|A0A6P7T7W6|A0A6P7T7W6_OCTVU Aspartyl aminopeptidase OS=Octopus vulgaris OX=6645 GN=LOC115220844 PE=3 SV=1	1326.62	1327.57	252	263	LDNLVNSFCACK	0.689456	12
>tr|A0A0L8HS70|A0A0L8HS70_OCTBM XPGN domain-containing protein OS=Octopus bimaculoides OX=37653 GN=OCBIM_22007405mg PE=3 SV=1	1857.09	1858.25	1	18	MGVHGLWSLLQPVGKPIR	0.689018	18
>tr|A0A6P7UBL9|A0A6P7UBL9_OCTVU fatty-acid amide hydrolase 2 isoform X2 OS=Octopus vulgaris OX=6645 GN=LOC115232529 PE=3 SV=1	1235.65	1236.48	272	281	YAEDLKPMLR	0.688655	10
>Cluster-116787.2;orf1 len=297 frame:-3 start:1585 end:695 gi|156313314|ref|XP_001617862.1| hypothetical protein NEMVEDRAFT_v1g225725 [Nematostella vectensis]>gi|156196177|gb|EDO25762.1| predicted protein [Nematostella vectensis]	2097.19	2098.57	229	248	MAAQYGVPLLGSLPLQIGIR	0.688648	20
>Cluster-58773.94617;orf1 len=371 frame:1 start:124 end:1236 gi|405970764|gb|EKC35640.1| E3 ubiquitin-protein ligase TRAF7 [Crassostrea gigas]	1269.49	1270.5	201	211	YCDSVSMCFSK	0.688582	11
>tr|A0A0L8GMT0|A0A0L8GMT0_OCTBM PKS_ER domain-containing protein OS=Octopus bimaculoides OX=37653 GN=OCBIM_22031489mg PE=4 SV=1	948.457	949.06	287	293	SWWQVDK	0.688535	7
>Cluster-58773.110379;orf1 len=257 frame:1 start:346 end:1116 gi|347972707|ref|XP_320580.4| AGAP011952-PA [Anopheles gambiae str. PEST]>gi|333469693|gb|EAA00684.4| AGAP011952-PA [Anopheles gambiae str. PEST]	1032.58	1033.22	64	72	EALINLGFR	0.688426	9
>tr|A0A6P7TG43|A0A6P7TG43_OCTVU GDP-4-keto-6-deoxy-D-mannose-3,5-epimerase-4-reductase OS=Octopus vulgaris OX=6645 GN=LOC115222310 PE=3 SV=1	1687.72	1688.83	306	319	DACDWFVQNFESAR	0.688204	14
>tr|A0A0L8HJ80|A0A0L8HJ80_OCTBM Major vault protein OS=Octopus bimaculoides OX=37653 GN=OCBIM_22013292mg PE=4 SV=1	1922.95	1924.24	150	166	LAGDEWMFLGPGTYIPR	0.688172	17
>tr|A0A7E6F1S6|A0A7E6F1S6_OCTVU microtubule-associated protein futsch isoform X4 OS=Octopus vulgaris OX=6645 GN=LOC115215514 PE=4 SV=1	2363	2364.37	894	914	HDAGLESQDYESQDAEVEGQR	0.687875	21
>tr|A0A7E6FNE1|A0A7E6FNE1_OCTVU dystrophin isoform X4 OS=Octopus vulgaris OX=6645 GN=LOC115232614 PE=4 SV=1	1972.93	1974.22	3349	3365	ASSHPEIQAAQFVDWMR	0.687718	17
>Cluster-58773.174510;orf1 len=264 frame:2 start:62 end:853 gi|260829110|ref|XP_002609505.1| hypothetical protein BRAFLDRAFT_127655 [Branchiostoma floridae]>gi|229294862|gb|EEN65515.1| hypothetical protein BRAFLDRAFT_127655 [Branchiostoma floridae]	1652.81	1653.91	133	146	SWISQEDLPHCIPK	0.68769	14
>Cluster-58773.132244;orf1 len=954 frame:2 start:176 end:3037 gi|159006|gb|AAA16244.1| peroxidase-like protein, partial [Euprymna scolopes]	1741.8	1742.92	360	375	SADGSCNNIQFPYLGR	0.68733	16
>tr|A0A0L8FXZ4|A0A0L8FXZ4_OCTBM Uncharacterized protein OS=Octopus bimaculoides OX=37653 GN=OCBIM_22004572mg PE=4 SV=1	1741.8	1742.92	45	60	SADGSCNNIQFPYLGR	0.68733	16
>tr|A0A812CD65|A0A812CD65_SEPPH Uncharacterized protein OS=Sepia pharaonis OX=158019 GN=SPHA_33819 PE=4 SV=1	1618.87	1619.92	2329	2340	LWAIWQELQYLR	0.687265	12
>Cluster-58773.162111;orf1 len=288 frame:1 start:1 end:864 gi|675369805|gb|KFM62707.1| Laminin subunit alpha-2, partial [Stegodyphus mimosarum]	3284.75	3286.83	246	274	VAQQALEFFKPWAALLGSTWTTLVNDIHK	0.686265	29
>tr|A0A7E6EGR4|A0A7E6EGR4_OCTVU short-chain collagen C4-like OS=Octopus vulgaris OX=6645 GN=LOC118760927 PE=4 SV=1	3507.64	3509.92	31	64	TTCPTNSSLVYDGLVGGQYYDQSGGGSNLLCLPK	0.686094	34
>Cluster-58773.159728;orf1 len=257 frame:1 start:901 end:1671 gi|291224559|ref|XP_002732271.1| PREDICTED: methylmalonic aciduria and homocystinuria type C protein homolog [Saccoglossus kowalevskii]	1403.77	1404.71	73	83	AFKPFIYNIYK	0.685993	11
>Cluster-58773.159728;orf1 len=257 frame:1 start:901 end:1671 gi|291224559|ref|XP_002732271.1| PREDICTED: methylmalonic aciduria and homocystinuria type C protein homolog [Saccoglossus kowalevskii]	1801.93	1803.08	23	38	VNEILGPFGFEAHPFK	0.685751	16
>tr|A0A6P7SJH5|A0A6P7SJH5_OCTVU cytosolic non-specific dipeptidase OS=Octopus vulgaris OX=6645 GN=LOC115213824 PE=3 SV=1	1803.83	1805.03	184	198	DIDYVCISDNYWLGK	0.6857	15
>Cluster-58773.93343;orf1 len=501 frame:1 start:1 end:1503 gi|762076444|ref|XP_011445523.1| PREDICTED: xylose isomerase-like [Crassostrea gigas] >Cluster-58773.93344;orf1 len=501 frame:1 start:1 end:1503 gi|762076444|ref|XP_011445523.1| PREDICTED: xylose isomerase-like [Crassostrea gigas]	1747.87	1749.05	70	85	IPFQPDAGPAETMVFK	0.685404	16
>tr|A0A7E6EZI8|A0A7E6EZI8_OCTVU uncharacterized protein LOC115214248 OS=Octopus vulgaris OX=6645 GN=LOC115214248 PE=4 SV=1	1123.61	1124.29	3603	3613	GPSLPTPDALR	0.68505	11
>Cluster-58773.148525;orf1 len=812 frame:2 start:422 end:2857 gi|676447145|ref|XP_009051312.1| hypothetical protein LOTGIDRAFT_201834 [Lottia gigantea]>gi|556109335|gb|ESO97987.1| hypothetical protein LOTGIDRAFT_201834 [Lottia gigantea]	945.461	946.123	572	580	AAPGYHMAK	0.684774	9
>tr|A0A7E6EW98|A0A7E6EW98_OCTVU 10-formyltetrahydrofolate dehydrogenase OS=Octopus vulgaris OX=6645 GN=LOC115216749 PE=3 SV=1	1089.49	1090.32	692	701	MGCGSVFFNK	0.684622	10
>tr|W6CNR9|W6CNR9_SEPOF Hemocyanin subunit 3 OS=Sepia officinalis OX=6610 PE=2 SV=1	1986.87	1988.16	357	374	HSDNCDNYAGEFFILGGK	0.683555	18
>tr|A0A6P7S965|A0A6P7S965_OCTVU ras GTPase-activating protein-binding protein 2 OS=Octopus vulgaris OX=6645 GN=LOC115210285 PE=4 SV=1	1123.5	1124.29	436	447	GSIMGGNMSGGR	0.683454	12
>tr|A0A6P7TDN6|A0A6P7TDN6_OCTVU 4a-hydroxytetrahydrobiopterin dehydratase OS=Octopus vulgaris OX=6645 GN=LOC115221645 PE=3 SV=1	843.447	843.966	24	30	FSPHLSR	0.683157	7
>tr|A0A6P7SUD6|A0A6P7SUD6_OCTVU 6-phosphogluconolactonase OS=Octopus vulgaris OX=6645 GN=LOC115216558 PE=3 SV=2	991.438	992.211	55	62	YLCNTFCK	0.682961	8
>tr|A0A7E6EY74|A0A7E6EY74_OCTVU twitchin OS=Octopus vulgaris OX=6645 GN=LOC115213975 PE=3 SV=1	1200.6	1201.33	832	842	SPSPQFQAPNK	0.682031	11
>Cluster-58773.104902;orf1 len=592 frame:3 start:618 end:2393 gi|524870221|ref|XP_005091896.1| PREDICTED: xaa-Pro dipeptidase-like [Aplysia californica]	1258.58	1259.43	191	201	LDASYSTWMGK	0.681983	11
>tr|A0A6P7SER3|A0A6P7SER3_OCTVU hemocyanin 1-like OS=Octopus vulgaris OX=6645 GN=LOC115212215 PE=4 SV=2	1122.56	1123.32	1938	1946	LSKPEDMFR	0.681946	9
>tr|A0A6P7SDC4|A0A6P7SDC4_OCTVU hemocyanin G-type, units Oda to Odg OS=Octopus vulgaris OX=6645 GN=LOC115211670 PE=4 SV=2	1122.56	1123.32	1957	1965	LSKPEDMFR	0.681946	9
>Cluster-58773.162319;orf1 len=2921 frame:3 start:24 end:8786 gi|16596797|gb|AAK28276.2| hemocyanin G-type [Enteroctopus dofleini]	1122.56	1123.32	1961	1969	LSKPEDMFR	0.681946	9
>tr|Q9BJ58|Q9BJ58_ENTDO Hemocyanin G-type (Fragment) OS=Enteroctopus dofleini OX=267067 PE=4 SV=2	1122.56	1123.32	1962	1970	LSKPEDMFR	0.681946	9
>sp|O61363|HCYG_ENTDO Hemocyanin G-type, units Oda to Odg OS=Enteroctopus dofleini OX=267067 GN=ODHCY PE=1 SV=1	1122.56	1123.32	1933	1941	LSKPEDMFR	0.681946	9
>Cluster-58773.105280;orf1 len=426 frame:1 start:307 end:1584 gi|827883539|dbj|BAR90777.1| beta arrestin [Idiosepius paradoxus] >Cluster-58773.105276;orf1 len=426 frame:1 start:307 end:1584 gi|827883539|dbj|BAR90777.1| beta arrestin [Idiosepius paradoxus] >tr|A0A6P7SCX4|A0A6P7SCX4_OCTVU beta-arrestin-1 OS=Octopus vulgaris OX=6645 GN=LOC115211741 PE=3 SV=1	1389.6	1390.46	402	412	DDDFIFEDFAR	0.681646	11
>tr|A0A6P7TGU1|A0A6P7TGU1_OCTVU actin-interacting protein 1 isoform X1 OS=Octopus vulgaris OX=6645 GN=LOC115223147 PE=4 SV=1	956.498	957.146	306	313	NCPEKPLR	0.681607	8
>tr|A0A7E6EY74|A0A7E6EY74_OCTVU twitchin OS=Octopus vulgaris OX=6645 GN=LOC115213975 PE=3 SV=1	1000.48	1001.13	3961	3967	FYEDIWK	0.681567	7
>tr|A0A6P7SVM2|A0A6P7SVM2_OCTVU Spectrin beta chain OS=Octopus vulgaris OX=6645 GN=LOC115216977 PE=3 SV=1	1299.64	1300.53	2350	2361	LAGGAEYLFQCK	0.68138	12
>tr|A0A6P7SDN6|A0A6P7SDN6_OCTVU gelsolin-like protein 2 OS=Octopus vulgaris OX=6645 GN=LOC115211664 PE=4 SV=1	1718.79	1719.99	186	200	HPSCLNDCDVFILDK	0.681253	15
>tr|A0A7E6FD92|A0A7E6FD92_OCTVU insulin-degrading enzyme OS=Octopus vulgaris OX=6645 GN=LOC115219912 PE=3 SV=1	1014.51	1015.23	777	784	EFCFTVLR	0.681079	8
>tr|A0A6P7TRC4|A0A6P7TRC4_OCTVU myosin heavy chain, striated muscle OS=Octopus vulgaris OX=6645 GN=LOC115225111 PE=3 SV=2	1304.62	1305.63	255	266	CTGCILHLGEMK	0.680956	12
>tr|A0A0L8HFB4|A0A0L8HFB4_OCTBM Pacifastin domain-containing protein OS=Octopus bimaculoides OX=37653 GN=OCBIM_22015839mg PE=4 SV=1	1345.57	1346.6	87	99	CFCGSNNVIGCTK	0.680741	13
>tr|A0A6P7T5D5|A0A6P7T5D5_OCTVU Aspartate aminotransferase OS=Octopus vulgaris OX=6645 GN=LOC115219838 PE=3 SV=1	871.431	871.974	113	119	LSADFYR	0.680391	7
>tr|A0A7E6FRZ6|A0A7E6FRZ6_OCTVU hemocyanin G-type, units Oda to Odg-like OS=Octopus vulgaris OX=6645 GN=LOC115225590 PE=4 SV=1	1847.8	1849	358	374	SDDCHHDAGEFFILGGK	0.679787	17
>tr|A0A7E6EK24|A0A7E6EK24_OCTVU deoxynucleoside triphosphate triphosphohydrolase SAMHD1-like OS=Octopus vulgaris OX=6645 GN=LOC115231394 PE=4 SV=1	1441.66	1442.71	63	75	FEHCLGTCYLAGK	0.679729	13
>Cluster-58773.190283;orf1 len=447 frame:2 start:353 end:1693 gi|617418760|ref|XP_007557771.1| PREDICTED: deoxynucleoside triphosphate triphosphohydrolase SAMHD1-like [Poecilia formosa]	1441.66	1442.71	108	120	FEHCLGTCYLAGK	0.679729	13
>tr|A0A6P7UBL9|A0A6P7UBL9_OCTVU fatty-acid amide hydrolase 2 isoform X2 OS=Octopus vulgaris OX=6645 GN=LOC115232529 PE=3 SV=1	1120.53	1121.44	262	271	ELLCVGPMCR	0.679419	10
>tr|A0A6P7TBG1|A0A6P7TBG1_OCTVU uridine phosphorylase 1 OS=Octopus vulgaris OX=6645 GN=LOC115220972 PE=3 SV=1	2880.23	2882.26	173	199	AIADSLSLPNCLGTTMCCDDFYEGQGR	0.679196	27
>tr|A0A6P7SUD6|A0A6P7SUD6_OCTVU 6-phosphogluconolactonase OS=Octopus vulgaris OX=6645 GN=LOC115216558 PE=3 SV=2	929.419	930.077	72	78	IFFCDER	0.679127	7
>tr|A0A812CD65|A0A812CD65_SEPPH Uncharacterized protein OS=Sepia pharaonis OX=158019 GN=SPHA_33819 PE=4 SV=1	1551.82	1552.82	571	583	TNPFFQAPIEFLK	0.678729	13
>Cluster-116787.2;orf1 len=297 frame:-3 start:1585 end:695 gi|156313314|ref|XP_001617862.1| hypothetical protein NEMVEDRAFT_v1g225725 [Nematostella vectensis]>gi|156196177|gb|EDO25762.1| predicted protein [Nematostella vectensis]	1013.62	1014.26	287	296	ASIPILSSLL	0.678605	10
>tr|A0A6P7SZ60|A0A6P7SZ60_OCTVU aldehyde dehydrogenase, mitochondrial OS=Octopus vulgaris OX=6645 GN=LOC115217872 PE=3 SV=1	1733.9	1735.13	416	430	IAQEEIFGPVMQIMK	0.678358	15
>tr|A0A6P7TGA0|A0A6P7TGA0_OCTVU Isocitrate dehydrogenase [NADP] OS=Octopus vulgaris OX=6645 GN=LOC115223822 PE=3 SV=1	1117.58	1118.29	80	88	YFDLGLPHR	0.677905	9
>tr|A0A6P7TM22|A0A6P7TM22_OCTVU Tetratricopeptide repeat protein 38 OS=Octopus vulgaris OX=6645 GN=LOC115223987 PE=3 SV=1	1337.76	1338.6	276	288	GIHPDVAGFIAIK	0.677901	13
>tr|A0A6P7SE31|A0A6P7SE31_OCTVU 26S proteasome non-ATPase regulatory subunit 2 OS=Octopus vulgaris OX=6645 GN=LOC115211842 PE=3 SV=1	2559.37	2561.03	386	410	DIGMLSATASLGLILLWDLDGGLSK	0.677782	25
>tr|A0A812DGV9|A0A812DGV9_SEPPH AIFM3 OS=Sepia pharaonis OX=158019 GN=SPHA_53448 PE=4 SV=1	882.399	882.954	572	578	SNEWLFS	0.677662	7
>Cluster-58773.6509;orf1 len=104 frame:2 start:2 end:313 sp|P11221|OPRI_PSEAE Major outer membrane lipoprotein OS=Pseudomonas aeruginosa (strain ATCC 15692 / DSM 22644 / CIP 104116 / JCM 14847 / LMG 12228 / 1C / PRS 101 / PAO1) GN=oprI PE=3 SV=1	983.495	984.106	1	8	GQFLFSER	0.677369	8
>tr|A0A0L8GKZ1|A0A0L8GKZ1_OCTBM Helicase C-terminal domain-containing protein OS=Octopus bimaculoides OX=37653 GN=OCBIM_22031992mg PE=4 SV=1	1038.49	1039.2	498	506	FLSDPSNMK	0.676623	9
>tr|A0A812CBN1|A0A812CBN1_SEPPH Uncharacterized protein OS=Sepia pharaonis OX=158019 GN=SPHA_33848 PE=4 SV=1	1386.8	1387.72	1229	1240	IFPDPTIIFVPK	0.676248	12
>tr|A0A6P7U0P7|A0A6P7U0P7_OCTVU zinc finger ZZ-type and EF-hand domain-containing protein 1 OS=Octopus vulgaris OX=6645 GN=LOC115228010 PE=4 SV=1	1566.97	1567.97	2578	2590	SLINLTLLRPLWK	0.676228	13
>tr|A0A0L8GUX3|A0A0L8GUX3_OCTBM Uncharacterized protein OS=Octopus bimaculoides OX=37653 GN=OCBIM_22027429mg PE=3 SV=1	1107.59	1108.35	326	334	VNQDFLMLK	0.676214	9
>tr|A0A6P7U7W9|A0A6P7U7W9_OCTVU putative aminopeptidase W07G4.4 isoform X1 OS=Octopus vulgaris OX=6645 GN=LOC115232621 PE=3 SV=1	1317.61	1318.74	355	365	MVMADLLCYMK	0.676089	11
>tr|A0A7E6EZI8|A0A7E6EZI8_OCTVU uncharacterized protein LOC115214248 OS=Octopus vulgaris OX=6645 GN=LOC115214248 PE=4 SV=1	958.463	959.053	146	153	GSYESLFR	0.675787	8
>Cluster-58773.104829;orf1 len=394 frame:3 start:15 end:1196 gi|524910869|ref|XP_005110308.1| PREDICTED: calumenin-like isoform X2 [Aplysia californica]	977.459	978.061	313	319	EQFHNFR	0.675523	7
>tr|A0A6P7SI10|A0A6P7SI10_OCTVU CD109 antigen isoform X2 OS=Octopus vulgaris OX=6645 GN=LOC115213260 PE=4 SV=1	1512.72	1513.83	659	671	QFQAPVMSSMYLK	0.675198	13
>tr|A0A6P7SH66|A0A6P7SH66_OCTVU alpha-actinin, sarcomeric isoform X3 OS=Octopus vulgaris OX=6645 GN=LOC115212896 PE=4 SV=1	1117.58	1118.35	27	35	EGLLLWCQR	0.674854	9
>tr|A0A6P7SB76|A0A6P7SB76_OCTVU epidermal retinol dehydrogenase 2 isoform X1 OS=Octopus vulgaris OX=6645 GN=LOC115210961 PE=3 SV=1	890.517	891.171	159	166	AFLPAMIK	0.674494	8
>tr|A0A6P7T9M7|A0A6P7T9M7_OCTVU Transgelin OS=Octopus vulgaris OX=6645 GN=LOC115221527 PE=3 SV=1	881.455	882.076	185	192	FASQIGMK	0.674405	8
>tr|A0A6P7SER3|A0A6P7SER3_OCTVU hemocyanin 1-like OS=Octopus vulgaris OX=6645 GN=LOC115212215 PE=4 SV=2	2202.17	2203.56	1918	1937	VPLKPFSFGAPYNLNAHTTK	0.674362	20
>tr|A0A7E6FNE1|A0A7E6FNE1_OCTVU dystrophin isoform X4 OS=Octopus vulgaris OX=6645 GN=LOC115232614 PE=4 SV=1	1177.6	1178.3	2255	2265	QSAAPDSHLLR	0.674305	11
>tr|A0A812DI02|A0A812DI02_SEPPH Tubulin beta chain OS=Sepia pharaonis OX=158019 GN=SPHA_52176 PE=3 SV=1	1143.63	1144.43	253	262	LAVNMVPFPR	0.674051	10
>tr|A0A7E6EZI8|A0A7E6EZI8_OCTVU uncharacterized protein LOC115214248 OS=Octopus vulgaris OX=6645 GN=LOC115214248 PE=4 SV=1	1087.59	1088.26	114	122	WISGQDLLR	0.673643	9
>tr|A0A6P7SCY0|A0A6P7SCY0_OCTVU uncharacterized protein LOC115211594 OS=Octopus vulgaris OX=6645 GN=LOC115211594 PE=4 SV=1	808.402	808.981	1	7	MGNFIGK	0.673528	7
>tr|W6CNR9|W6CNR9_SEPOF Hemocyanin subunit 3 OS=Sepia officinalis OX=6610 PE=2 SV=1	2084.94	2086.49	1334	1350	VYTCCLHGMPTFPHWHR	0.673343	17
>tr|A0A7E6FNE1|A0A7E6FNE1_OCTVU dystrophin isoform X4 OS=Octopus vulgaris OX=6645 GN=LOC115232614 PE=4 SV=1	1508.81	1509.89	3313	3325	LGLLIHDCMQIPR	0.67316	13
>tr|G0Y7C4|G0Y7C4_9MOLL Arginine kinase OS=Sepiella maindroni OX=153280 GN=AK PE=2 SV=1	1295.57	1296.35	191	202	AASGYDDWPTGR	0.673152	12
>tr|A0A6P7SA56|A0A6P7SA56_OCTVU cathepsin B OS=Octopus vulgaris OX=6645 GN=LOC115210644 PE=3 SV=1	1264.6	1265.38	47	57	AQDNFGWADLK	0.672926	11
>tr|A0A812BBI7|A0A812BBI7_SEPPH Annexin OS=Sepia pharaonis OX=158019 GN=SPHA_13606 PE=3 SV=1	932.411	932.971	139	146	SDTSGYFR	0.67266	8
>Cluster-58773.152800;orf1 len=247 frame:1 start:922 end:1662 gi|762070756|ref|XP_011421184.1| PREDICTED: glutathione S-transferase A-like [Crassostrea gigas]	871.365	871.993	168	173	WEDYMK	0.672594	6
>tr|A0A6P7STJ4|A0A6P7STJ4_OCTVU Carboxylic ester hydrolase OS=Octopus vulgaris OX=6645 GN=LOC115216415 PE=3 SV=1	922.507	923.169	332	339	DVMIGFLK	0.672187	8
>tr|A0A7E6EU42|A0A7E6EU42_OCTVU rho GDP-dissociation inhibitor 1 isoform X1 OS=Octopus vulgaris OX=6645 GN=LOC115211966 PE=3 SV=1	1209.59	1210.38	212	220	WEWAFEITK	0.670643	9
>tr|A0A6P7TM22|A0A6P7TM22_OCTVU Tetratricopeptide repeat protein 38 OS=Octopus vulgaris OX=6645 GN=LOC115223987 PE=3 SV=1	1303.67	1304.5	145	155	LSQFANYYLGK	0.670355	11
>tr|A0A6P7U0P7|A0A6P7U0P7_OCTVU zinc finger ZZ-type and EF-hand domain-containing protein 1 OS=Octopus vulgaris OX=6645 GN=LOC115228010 PE=4 SV=1	1212.72	1213.47	188	199	APSSSLSLPILK	0.670109	12
>tr|A0A812DEV9|A0A812DEV9_SEPPH Rab GDP dissociation inhibitor OS=Sepia pharaonis OX=158019 GN=SPHA_54563 PE=3 SV=1	3453.7	3455.94	433	463	SIPPPADAWCLLYSLAGHVQHPYTLSQEGFR	0.669951	31
>tr|A0A812DI02|A0A812DI02_SEPPH Tubulin beta chain OS=Sepia pharaonis OX=158019 GN=SPHA_52176 PE=3 SV=1	1130.6	1131.28	242	251	FPGQLNADLR	0.669888	10
>tr|A0A7E6FRZ6|A0A7E6FRZ6_OCTVU hemocyanin G-type, units Oda to Odg-like OS=Octopus vulgaris OX=6645 GN=LOC115225590 PE=4 SV=1	1534.86	1535.85	667	678	LWAIWQALQIHR	0.668902	12
>tr|A0A812CBL4|A0A812CBL4_SEPPH HSPA1s OS=Sepia pharaonis OX=158019 GN=SPHA_33061 PE=3 SV=1	1081.57	1082.25	367	375	LLQDFFNGK	0.66886	9
>tr|A0A0L8HJQ8|A0A0L8HJQ8_OCTBM Peptidase M20 domain-containing protein 2 OS=Octopus bimaculoides OX=37653 GN=OCBIM_22013224mg PE=3 SV=1	2297.13	2298.64	230	249	NGGIAPNIIPEFSEMEYFIR	0.668771	20
>tr|A0A6P7TGG8|A0A6P7TGG8_OCTVU Gamma-cystathionase OS=Octopus vulgaris OX=6645 GN=LOC115223921 PE=3 SV=1	2214.05	2215.57	235	254	FLQNACGAVPSPFDCYLVNR	0.668585	20
>tr|A0A6P7SIX4|A0A6P7SIX4_OCTVU Inorganic diphosphatase OS=Octopus vulgaris OX=6645 GN=LOC115213471 PE=3 SV=2	1300.62	1301.42	1	12	MQHFHPSFTGSR	0.668576	12
>tr|A0A0L8HXN5|A0A0L8HXN5_OCTBM SGL domain-containing protein OS=Octopus bimaculoides OX=37653 GN=OCBIM_22003174mg PE=4 SV=1	1670.85	1671.97	264	277	CPFVKPSNIHFEPR	0.668576	14
>tr|A0A812DI02|A0A812DI02_SEPPH Tubulin beta chain OS=Sepia pharaonis OX=158019 GN=SPHA_52176 PE=3 SV=1	1620.84	1621.96	263	276	LHFFMPGFAPLTSR	0.668184	14
>Cluster-58773.193716;orf1 len=468 frame:2 start:29 end:1432 gi|676464997|ref|XP_009057101.1| hypothetical protein LOTGIDRAFT_233221 [Lottia gigantea]>gi|556103524|gb|ESO92176.1| hypothetical protein LOTGIDRAFT_233221 [Lottia gigantea]	1441.77	1442.71	155	167	LPLGFTFSFPSTK	0.668184	13
>tr|A0A6P7S644|A0A6P7S644_OCTVU Proteasome subunit beta OS=Octopus vulgaris OX=6645 GN=LOC115209401 PE=3 SV=1	946.409	947.064	119	125	DLCYNYR	0.667949	7
>Cluster-58773.193716;orf1 len=468 frame:2 start:29 end:1432 gi|676464997|ref|XP_009057101.1| hypothetical protein LOTGIDRAFT_233221 [Lottia gigantea]>gi|556103524|gb|ESO92176.1| hypothetical protein LOTGIDRAFT_233221 [Lottia gigantea]	825.363	826.03	120	126	MPAECFK	0.667924	7
>tr|A0A7E6F650|A0A7E6F650_OCTVU Ribokinase OS=Octopus vulgaris OX=6645 GN=LOC115217290 PE=3 SV=1	1362.69	1363.65	40	53	GANQCVMASLLGAK	0.667839	14
>tr|A0A0L8I420|A0A0L8I420_OCTBM Uncharacterized protein (Fragment) OS=Octopus bimaculoides OX=37653 GN=OCBIM_22037121mg PE=3 SV=1	809.434	810.012	101	106	VMQLFR	0.667748	6
>tr|A0A0L8H9P1|A0A0L8H9P1_OCTBM Uncharacterized protein OS=Octopus bimaculoides OX=37653 GN=OCBIM_22019540mg PE=3 SV=1	1293.59	1294.37	239	250	AASGYDDWPVGR	0.667382	12
>tr|A0A6P7TSR4|A0A6P7TSR4_OCTVU Carboxypeptidase OS=Octopus vulgaris OX=6645 GN=LOC115226095 PE=3 SV=1	1836.97	1838.19	321	337	LVPPCINGTASLVYFSR	0.667288	17
>tr|A0A6P7SPL2|A0A6P7SPL2_OCTVU glycogenin-1 isoform X2 OS=Octopus vulgaris OX=6645 GN=LOC115215187 PE=4 SV=1	2125.12	2126.55	213	230	IVHFLGAIKPWQHCYNAK	0.667097	18
>tr|A0A812BQ89|A0A812BQ89_SEPPH Transaldolase OS=Sepia pharaonis OX=158019 GN=SPHA_21947 PE=3 SV=1	920.524	921.134	66	72	ILDWFVK	0.666827	7
>tr|A0A0L8FKC8|A0A0L8FKC8_OCTBM 26S proteasome regulatory subunit 7 OS=Octopus bimaculoides OX=37653 GN=OCBIM_22017212mg PE=3 SV=1	1142.66	1143.38	212	223	GVLLFGPPGTGK	0.66657	12
>tr|A0A6P7T976|A0A6P7T976_OCTVU H(+)-transporting two-sector ATPase OS=Octopus vulgaris OX=6645 GN=LOC115221352 PE=3 SV=1	1095.58	1096.28	465	473	SFTEFVPLR	0.666414	9
>tr|A0A7E6ENX1|A0A7E6ENX1_OCTVU spectrin alpha chain isoform X2 OS=Octopus vulgaris OX=6645 GN=LOC115227715 PE=3 SV=1	1285.64	1286.5	381	390	DLISWIHDMR	0.665979	10
>tr|A0A7E6FAL0|A0A7E6FAL0_OCTVU protein hu-li tai shao isoform X12 OS=Octopus vulgaris OX=6645 GN=LOC115218883 PE=3 SV=1	2147.08	2148.45	124	141	LIDFFGWSHGIYNHITAR	0.665492	18
>tr|A0A6P7SER3|A0A6P7SER3_OCTVU hemocyanin 1-like OS=Octopus vulgaris OX=6645 GN=LOC115212215 PE=4 SV=2	2378.08	2379.76	231	252	GLDGSANCGLNMFHKPMEPFGR	0.665452	22
>tr|A0A6P7SDC4|A0A6P7SDC4_OCTVU hemocyanin G-type, units Oda to Odg OS=Octopus vulgaris OX=6645 GN=LOC115211670 PE=4 SV=2	2378.08	2379.76	250	271	GLDGSANCGLNMFHKPMEPFGR	0.665452	22
>Cluster-58773.162319;orf1 len=2921 frame:3 start:24 end:8786 gi|16596797|gb|AAK28276.2| hemocyanin G-type [Enteroctopus dofleini]	2378.08	2379.76	254	275	GLDGSANCGLNMFHKPMEPFGR	0.665452	22
>tr|A0A6P7U4P1|A0A6P7U4P1_OCTVU deoxynucleoside triphosphate triphosphohydrolase SAMHD1-like isoform X2 OS=Octopus vulgaris OX=6645 GN=LOC115231345 PE=4 SV=1	1415.66	1416.67	60	72	FEHCLGTCHLAGK	0.665448	13
>tr|A0A7E6F1S6|A0A7E6F1S6_OCTVU microtubule-associated protein futsch isoform X4 OS=Octopus vulgaris OX=6645 GN=LOC115215514 PE=4 SV=1	3977.56	3980.04	1222	1255	QIHEDQIDDEEDEDSSEVASQPETNEMAMDWDEK	0.665399	34
>Cluster-58773.197059;orf1 len=509 frame:1 start:352 end:1878 gi|260816652|ref|XP_002603202.1| hypothetical protein BRAFLDRAFT_281736 [Branchiostoma floridae]>gi|229288519|gb|EEN59213.1| hypothetical protein BRAFLDRAFT_281736 [Branchiostoma floridae]	806.361	806.924	165	171	AAWCEAR	0.665244	7
>tr|A0A6P7TMY2|A0A6P7TMY2_OCTVU Fumarylacetoacetase OS=Octopus vulgaris OX=6645 GN=LOC115226547 PE=3 SV=2	806.361	806.924	98	104	AAWCEAR	0.665244	7
>tr|A0A6P7T033|A0A6P7T033_OCTVU T-complex protein 1 subunit gamma OS=Octopus vulgaris OX=6645 GN=LOC115218091 PE=3 SV=1	1304.61	1305.51	494	504	QYGIWEPCAVR	0.665142	11
>tr|A0A812DGV9|A0A812DGV9_SEPPH AIFM3 OS=Sepia pharaonis OX=158019 GN=SPHA_53448 PE=4 SV=1	1038.56	1039.23	553	561	FAELLFNGK	0.665037	9
>tr|A0A7E6ENX1|A0A7E6ENX1_OCTVU spectrin alpha chain isoform X2 OS=Octopus vulgaris OX=6645 GN=LOC115227715 PE=3 SV=1	800.394	800.895	1297	1302	FLSDYR	0.664683	6
>tr|A0A6P7SKR8|A0A6P7SKR8_OCTVU Vesicle-fusing ATPase OS=Octopus vulgaris OX=6645 GN=LOC115213827 PE=4 SV=1 >tr|A0A0L8GAT1|A0A0L8GAT1_OCTBM Vesicle-fusing ATPase OS=Octopus bimaculoides OX=37653 GN=OCBIM_22037045mg PE=4 SV=1	819.472	819.985	146	152	GDIFLVR	0.6646	7
>tr|A0A6P7TWP3|A0A6P7TWP3_OCTVU chymotrypsin-like protease CTRL-1 OS=Octopus vulgaris OX=6645 GN=LOC115226866 PE=4 SV=2	2267.11	2268.57	159	180	LAGVISWGISTCSGDYPAVNTR	0.664471	22
>tr|A0A6P7SYF3|A0A6P7SYF3_OCTVU retinal dehydrogenase 1 OS=Octopus vulgaris OX=6645 GN=LOC115217862 PE=3 SV=1	879.53	880.082	1	10	MSAGIPPPIK	0.664375	10
>tr|A0A6P7U2G4|A0A6P7U2G4_OCTVU uncharacterized protein LOC115232424 OS=Octopus vulgaris OX=6645 GN=LOC115232424 PE=4 SV=1	949.456	950.111	412	419	IENCPAFR	0.664298	8
>tr|A0A6P7SQ23|A0A6P7SQ23_OCTVU reticulocalbin-2 isoform X2 OS=Octopus vulgaris OX=6645 GN=LOC115215179 PE=4 SV=1	1294.64	1295.49	137	146	FYSYTPEFLK	0.664298	10
>tr|A0A0L8G0V9|A0A0L8G0V9_OCTBM Uncharacterized protein OS=Octopus bimaculoides OX=37653 GN=OCBIM_22003270mg PE=3 SV=1	1281.65	1282.45	333	342	FEDLNIDLFR	0.66409	10
>tr|A0A0L8HB35|A0A0L8HB35_OCTBM CCT-beta OS=Octopus bimaculoides OX=37653 GN=OCBIM_22018710mg PE=3 SV=1	863.383	863.976	531	537	QPDMRPH	0.663568	7
>tr|A0A7E6ENX1|A0A7E6ENX1_OCTVU spectrin alpha chain isoform X2 OS=Octopus vulgaris OX=6645 GN=LOC115227715 PE=3 SV=1	804.473	804.973	795	800	LQQFLR	0.663297	6
>tr|A0A7E6F5B1|A0A7E6F5B1_OCTVU collagen alpha-1(XII) chain-like OS=Octopus vulgaris OX=6645 GN=LOC118765117 PE=4 SV=1	1177.66	1178.38	100	110	AISDILYLGGR	0.663262	11
>tr|A0A7E6FJ93|A0A7E6FJ93_OCTVU Annexin OS=Octopus vulgaris OX=6645 GN=LOC115223011 PE=3 SV=1	1784.89	1786.07	358	373	SELSGNFENVVLAMFK	0.663252	16
>tr|A0A6P7TD81|A0A6P7TD81_OCTVU dipeptidyl peptidase 2 isoform X1 OS=Octopus vulgaris OX=6645 GN=LOC115222860 PE=3 SV=1	1537.84	1538.8	144	157	QALADFAHLINTLK	0.662608	14
>tr|A0A6P7SE31|A0A6P7SE31_OCTVU 26S proteasome non-ATPase regulatory subunit 2 OS=Octopus vulgaris OX=6645 GN=LOC115211842 PE=3 SV=1	885.404	886.026	244	250	QYPHAMR	0.662556	7
>tr|A0A7E6FNE1|A0A7E6FNE1_OCTVU dystrophin isoform X4 OS=Octopus vulgaris OX=6645 GN=LOC115232614 PE=4 SV=1	1709.88	1711.05	1951	1964	ANLSMTVPLWFQFR	0.66167	14
>tr|A0A6P7TFA3|A0A6P7TFA3_OCTVU Polyol dehydrogenase OS=Octopus vulgaris OX=6645 GN=LOC115223465 PE=3 SV=1	991.441	992.108	103	110	EGHYNLCR	0.661386	8
>tr|A0A0L8G0N4|A0A0L8G0N4_OCTBM Prolyl endopeptidase OS=Octopus bimaculoides OX=37653 GN=OCBIM_22003476mg PE=3 SV=1	1089.5	1090.19	726	734	SLGLDWFDH	0.661338	9
>tr|A0A6P7S965|A0A6P7S965_OCTVU ras GTPase-activating protein-binding protein 2 OS=Octopus vulgaris OX=6645 GN=LOC115210285 PE=4 SV=1	900.428	900.932	474	485	GGPGTGGGGGAR	0.661245	12
>tr|A0A7E6F650|A0A7E6F650_OCTVU Ribokinase OS=Octopus vulgaris OX=6645 GN=LOC115217290 PE=3 SV=1	868.431	868.973	32	39	FQQGFGGK	0.660716	8
>Cluster-960.0;orf1 len=210 frame:1 start:22 end:651 gi|164608848|gb|ABY62755.1| sarcoplasmic calcium-binding protein [Artemia franciscana]	1116.48	1117.23	44	52	NDFESMAFR	0.660697	9
>tr|W6CNR9|W6CNR9_SEPOF Hemocyanin subunit 3 OS=Sepia officinalis OX=6610 PE=2 SV=1	2275.1	2276.59	2853	2872	NAGVLFVLGGETEMPWHFDR	0.660687	20
>tr|A0A6P7TGA0|A0A6P7TGA0_OCTVU Isocitrate dehydrogenase [NADP] OS=Octopus vulgaris OX=6645 GN=LOC115223822 PE=3 SV=1	1528.73	1529.77	228	240	DFAHASFQYALMK	0.660661	13
>tr|A0A7E6EY74|A0A7E6EY74_OCTVU twitchin OS=Octopus vulgaris OX=6645 GN=LOC115213975 PE=3 SV=1	1649.84	1651.01	619	633	CVIQTPFGEGVQLMK	0.66056	15
>tr|A0A0L8GLX8|A0A0L8GLX8_OCTBM S-formylglutathione hydrolase OS=Octopus bimaculoides OX=37653 GN=OCBIM_22031609mg PE=3 SV=1	1607.72	1608.78	197	210	EDGWHAYDACSLIK	0.659765	14
>tr|A0A6P7TK16|A0A6P7TK16_OCTVU Phosphomannomutase OS=Octopus vulgaris OX=6645 GN=LOC115223856 PE=3 SV=1	869.452	870.002	120	126	GTFIEFR	0.65954	7
>tr|A0A6P7SEM8|A0A6P7SEM8_OCTVU Alpha-mannosidase OS=Octopus vulgaris OX=6645 GN=LOC115211875 PE=3 SV=1	2349.25	2350.81	669	688	GPLVQEVHQVFCPWITQVIR	0.659412	20
>tr|A0A6P7STJ4|A0A6P7STJ4_OCTVU Carboxylic ester hydrolase OS=Octopus vulgaris OX=6645 GN=LOC115216415 PE=3 SV=1	1956.04	1957.32	181	198	APGNMGLLDQTLAISWIR	0.659031	18
>tr|A0A6P7S854|A0A6P7S854_OCTVU neuroglian isoform X1 OS=Octopus vulgaris OX=6645 GN=LOC115210201 PE=4 SV=1	3222.73	3224.75	3	31	IAVLLATSFIFLLTVHHVSAQWDASPTER	0.658641	29
>Cluster-58773.159728;orf1 len=257 frame:1 start:901 end:1671 gi|291224559|ref|XP_002732271.1| PREDICTED: methylmalonic aciduria and homocystinuria type C protein homolog [Saccoglossus kowalevskii]	2650.34	2652	120	143	APQHYSILVQTAAHVAGAAYYYQK	0.658629	24
>tr|A0A6P7U0P7|A0A6P7U0P7_OCTVU zinc finger ZZ-type and EF-hand domain-containing protein 1 OS=Octopus vulgaris OX=6645 GN=LOC115228010 PE=4 SV=1	1739	1740.18	2648	2665	VFHGACVIAAIGLALGVK	0.658562	18
>tr|A0A6P7T7L0|A0A6P7T7L0_OCTVU heat shock cognate 71 kDa protein OS=Octopus vulgaris OX=6645 GN=LOC115220772 PE=3 SV=1	1023.56	1024.22	349	357	LLQGFFNGK	0.658298	9
>tr|A0A6P7SJ72|A0A6P7SJ72_OCTVU Glutamine--fructose-6-phosphate transaminase (isomerizing) OS=Octopus vulgaris OX=6645 GN=LOC115213781 PE=4 SV=1	921.355	922.032	671	678	NCDVDCPR	0.657857	8
>tr|A0A077B6R8|A0A077B6R8_EUPSC Hemocyanin subunit 1 OS=Euprymna scolopes OX=6613 GN=HCY1 PE=2 SV=1	975.515	976.124	2665	2672	DIQPDLFK	0.656669	8
>tr|Q27Q56|Q27Q56_SEPOF Hemocyanin subunit 2 (Fragment) OS=Sepia officinalis OX=6610 PE=2 SV=1	1102.5	1103.25	892	901	WCPSPDAAQK	0.656271	10
>tr|A0A077B6R8|A0A077B6R8_EUPSC Hemocyanin subunit 1 OS=Euprymna scolopes OX=6613 GN=HCY1 PE=2 SV=1	1102.5	1103.25	910	919	WCPSPDAAQK	0.656271	10
>tr|A0A812DI02|A0A812DI02_SEPPH Tubulin beta chain OS=Sepia pharaonis OX=158019 GN=SPHA_52176 PE=3 SV=1	1229.6	1230.44	381	390	ISEQFTAMFR	0.656122	10
>tr|A0A6P7TRF4|A0A6P7TRF4_OCTVU catalase OS=Octopus vulgaris OX=6645 GN=LOC115228352 PE=3 SV=1	932.52	933.102	94	102	AAPFQTIGK	0.656118	9
>tr|A0A6P7TS50|A0A6P7TS50_OCTVU Glutamate--cysteine ligase OS=Octopus vulgaris OX=6645 GN=LOC115225878 PE=3 SV=2	1364.76	1365.63	513	524	DDFPGLIPLIHK	0.655917	12
>Cluster-58773.155745;orf1 len=271 frame:1 start:403 end:1215 gi|443706878|gb|ELU02754.1| hypothetical protein CAPTEDRAFT_117881, partial [Capitella teleta]	1664.8	1665.95	166	180	SLHDHNVPCAVCLTR	0.655619	15
>Cluster-58773.74875;orf1 len=741 frame:2 start:1832 end:4054 gi|159006|gb|AAA16244.1| peroxidase-like protein, partial [Euprymna scolopes]	2077.04	2078.37	525	543	LFESAPGQSLDLASMNIQR	0.655585	19
>tr|A0A7E6FFI6|A0A7E6FFI6_OCTVU chorion peroxidase-like OS=Octopus vulgaris OX=6645 GN=LOC115221248 PE=4 SV=1	2093.03	2094.37	417	435	LFESAPGQSLDLASMNIQR	0.655585	19
>tr|A0A6P7TKE4|A0A6P7TKE4_OCTVU probable aminopeptidase NPEPL1 isoform X1 OS=Octopus vulgaris OX=6645 GN=LOC115223934 PE=3 SV=1	3876.9	3879.43	328	362	LGFTENLHAIFCLAENAISPDALRPDDIINMYSGR	0.655324	35
>tr|A0A7E6EY74|A0A7E6EY74_OCTVU twitchin OS=Octopus vulgaris OX=6645 GN=LOC115213975 PE=3 SV=1	966.471	967.139	2704	2712	CSSFINAPK	0.655263	9
>tr|A0A7E6ENU9|A0A7E6ENU9_OCTVU tumor protein D52 isoform X12 OS=Octopus vulgaris OX=6645 GN=LOC115209283 PE=3 SV=1	2129	2130.24	112	134	DSGTGGGASSILAGASSSDLYQK	0.65438	23
>Cluster-58773.132244;orf1 len=954 frame:2 start:176 end:3037 gi|159006|gb|AAA16244.1| peroxidase-like protein, partial [Euprymna scolopes]	1975.84	1977.2	904	921	SYGVWSAWTACADGQMSR	0.654158	18
>tr|A0A6P7SVM2|A0A6P7SVM2_OCTVU Spectrin beta chain OS=Octopus vulgaris OX=6645 GN=LOC115216977 PE=3 SV=1	811.469	811.971	2342	2347	RPHVFR	0.653918	6
>tr|A0A0L8GSS4|A0A0L8GSS4_OCTBM AAA domain-containing protein OS=Octopus bimaculoides OX=37653 GN=OCBIM_22029167mg PE=3 SV=1 >tr|A0A6P7SHR1|A0A6P7SHR1_OCTVU 26S proteasome regulatory subunit 6B OS=Octopus vulgaris OX=6645 GN=LOC115213143 PE=3 SV=1	1394.78	1395.61	314	326	ADTLDPALLRPGR	0.653902	13
>tr|A0A7E6FIQ7|A0A7E6FIQ7_OCTVU uncharacterized protein LOC115221679 isoform X1 OS=Octopus vulgaris OX=6645 GN=LOC115221679 PE=4 SV=1	1001.52	1002.12	240	248	SHTFSIPGR	0.653835	9
>tr|A0A6P7TKE4|A0A6P7TKE4_OCTVU probable aminopeptidase NPEPL1 isoform X1 OS=Octopus vulgaris OX=6645 GN=LOC115223934 PE=3 SV=1	1643.81	1644.9	311	327	DCGGAAAILGAFYSTVK	0.653534	17
>sp|O61363|HCYG_ENTDO Hemocyanin G-type, units Oda to Odg OS=Enteroctopus dofleini OX=267067 GN=ODHCY PE=1 SV=1	1546.85	1547.85	638	649	LWAVWQALQIYR	0.653319	12
>tr|A0A6P7TS50|A0A6P7TS50_OCTVU Glutamate--cysteine ligase OS=Octopus vulgaris OX=6645 GN=LOC115225878 PE=3 SV=2	1701.79	1702.94	145	159	LGCPNFSFPSYEVNK	0.653057	15
>tr|A0A6P7SVM2|A0A6P7SVM2_OCTVU Spectrin beta chain OS=Octopus vulgaris OX=6645 GN=LOC115216977 PE=3 SV=1	1760.89	1761.99	1067	1080	FLGNLDHFQQWLSR	0.652943	14
>tr|A0A0L8IDH2|A0A0L8IDH2_OCTBM Non-specific serine/threonine protein kinase OS=Octopus bimaculoides OX=37653 GN=OCBIM_22020713mg PE=3 SV=1	809.394	809.905	262	267	NQWFSK	0.65232	6
>tr|A0A6P7U0P7|A0A6P7U0P7_OCTVU zinc finger ZZ-type and EF-hand domain-containing protein 1 OS=Octopus vulgaris OX=6645 GN=LOC115228010 PE=4 SV=1	1050.54	1051.2	688	696	SIQFSGFHK	0.652153	9
>tr|A0A6P7SER3|A0A6P7SER3_OCTVU hemocyanin 1-like OS=Octopus vulgaris OX=6645 GN=LOC115212215 PE=4 SV=2	2084.94	2086.49	1311	1327	VYTCCIHGMPTFPHWHR	0.651943	17
>tr|A0A6P7SDC4|A0A6P7SDC4_OCTVU hemocyanin G-type, units Oda to Odg OS=Octopus vulgaris OX=6645 GN=LOC115211670 PE=4 SV=2	2084.94	2086.49	1330	1346	VYTCCIHGMPTFPHWHR	0.651943	17
>Cluster-58773.162319;orf1 len=2921 frame:3 start:24 end:8786 gi|16596797|gb|AAK28276.2| hemocyanin G-type [Enteroctopus dofleini]	2084.94	2086.49	1334	1350	VYTCCIHGMPTFPHWHR	0.651943	17
>tr|Q9BJ58|Q9BJ58_ENTDO Hemocyanin G-type (Fragment) OS=Enteroctopus dofleini OX=267067 PE=4 SV=2	2084.94	2086.49	1335	1351	VYTCCIHGMPTFPHWHR	0.651943	17
>sp|O61363|HCYG_ENTDO Hemocyanin G-type, units Oda to Odg OS=Enteroctopus dofleini OX=267067 GN=ODHCY PE=1 SV=1	2084.94	2086.49	1306	1322	VYTCCIHGMPTFPHWHR	0.651943	17
>tr|A0A6P7TPR7|A0A6P7TPR7_OCTVU uncharacterized protein LOC115224696 OS=Octopus vulgaris OX=6645 GN=LOC115224696 PE=4 SV=2	866.444	867.061	327	333	KPFDMTK	0.651786	7
>tr|A0A812BBI7|A0A812BBI7_SEPPH Annexin OS=Sepia pharaonis OX=158019 GN=SPHA_13606 PE=3 SV=1	1144.4	1145.22	9	18	DDFDCEAACR	0.650883	10
>tr|A0A7E6F497|A0A7E6F497_OCTVU ATP-citrate synthase OS=Octopus vulgaris OX=6645 GN=LOC115216353 PE=3 SV=1	1460.69	1461.69	678	689	YPGTTFPDYIMR	0.650837	12
>tr|A0A812CYT6|A0A812CYT6_SEPPH MYH OS=Sepia pharaonis OX=158019 GN=SPHA_42230 PE=3 SV=1	1551.87	1552.93	327	340	VVSAVLLFGNMVFR	0.650802	14
>tr|A0A6P7SB76|A0A6P7SB76_OCTVU epidermal retinol dehydrogenase 2 isoform X1 OS=Octopus vulgaris OX=6645 GN=LOC115210961 PE=3 SV=1	2813.39	2815.15	167	194	ENHGHVVTVASAAGLLGVNSLTDYCASK	0.65049	28
>tr|A0A6P7U0P7|A0A6P7U0P7_OCTVU zinc finger ZZ-type and EF-hand domain-containing protein 1 OS=Octopus vulgaris OX=6645 GN=LOC115228010 PE=4 SV=1	1102.7	1103.4	2557	2565	LNTIFLLLR	0.650471	9
>tr|A0A7E6EZI8|A0A7E6EZI8_OCTVU uncharacterized protein LOC115214248 OS=Octopus vulgaris OX=6645 GN=LOC115214248 PE=4 SV=1	1387.73	1388.58	2036	2048	GTSGDFKPPNVLR	0.650448	13
>tr|A0A7E6FLF6|A0A7E6FLF6_OCTVU leukotriene A-4 hydrolase-like OS=Octopus vulgaris OX=6645 GN=LOC115223638 PE=3 SV=1	2091.18	2092.5	182	201	QPVPIPSYLIAIVVGDLASR	0.650359	20
>Cluster-58773.159728;orf1 len=257 frame:1 start:901 end:1671 gi|291224559|ref|XP_002732271.1| PREDICTED: methylmalonic aciduria and homocystinuria type C protein homolog [Saccoglossus kowalevskii]	2081.04	2082.45	155	172	TIFGISIHPQYGGWFAMR	0.649746	18
>tr|A0A6P7SUU8|A0A6P7SUU8_OCTVU 2-iminobutanoate/2-iminopropanoate deaminase OS=Octopus vulgaris OX=6645 GN=LOC115216465 PE=3 SV=1	1144.54	1145.27	99	108	YFAGTDFPAR	0.649422	10
>tr|A0A6P7T245|A0A6P7T245_OCTVU trans-1,2-dihydrobenzene-1,2-diol dehydrogenase isoform X1 OS=Octopus vulgaris OX=6645 GN=LOC115218668 PE=4 SV=1	1289.61	1290.6	116	125	LFFMEGMWTK	0.649156	10
>tr|A0A6P7U0P7|A0A6P7U0P7_OCTVU zinc finger ZZ-type and EF-hand domain-containing protein 1 OS=Octopus vulgaris OX=6645 GN=LOC115228010 PE=4 SV=1	2481.3	2482.93	2353	2375	LFGVSDGHQVSCIFDLLHGVLPK	0.648925	23
>tr|A0A6P7S854|A0A6P7S854_OCTVU neuroglian isoform X1 OS=Octopus vulgaris OX=6645 GN=LOC115210201 PE=4 SV=1	1736.89	1738.14	256	270	EFLIQCMYGGIPIPR	0.648408	15
>tr|A0A6P7SKR8|A0A6P7SKR8_OCTVU Vesicle-fusing ATPase OS=Octopus vulgaris OX=6645 GN=LOC115213827 PE=4 SV=1 >tr|A0A0L8GAT1|A0A0L8GAT1_OCTBM Vesicle-fusing ATPase OS=Octopus bimaculoides OX=37653 GN=OCBIM_22037045mg PE=4 SV=1	1426.65	1427.65	678	690	GFSGADLMEICQR	0.648181	13
>tr|F0V3W2|F0V3W2_LEPCI Hemocyanin (Fragment) OS=Lepidochitona cinerea OX=256056 PE=2 SV=1	1005.5	1006.24	245	253	ANCALQVMR	0.64807	9
>tr|A0A0L8GJH5|A0A0L8GJH5_OCTBM Pyruvate kinase OS=Octopus bimaculoides OX=37653 GN=OCBIM_22032473mg PE=3 SV=1	1441.72	1442.63	509	521	ALEAGHDHGFIFK	0.648048	13
>tr|A0A7E6FLF6|A0A7E6FLF6_OCTVU leukotriene A-4 hydrolase-like OS=Octopus vulgaris OX=6645 GN=LOC115223638 PE=3 SV=1	1228.65	1229.5	542	552	CIPHAVSFINK	0.647878	11
>tr|A0A6P7ST76|A0A6P7ST76_OCTVU elongation factor 1-beta OS=Octopus vulgaris OX=6645 GN=LOC115216350 PE=3 SV=1	809.386	809.965	1	7	MGFGDLK	0.647823	7
>tr|A0A7E6EW98|A0A7E6EW98_OCTVU 10-formyltetrahydrofolate dehydrogenase OS=Octopus vulgaris OX=6645 GN=LOC115216749 PE=3 SV=1	1467.69	1468.74	676	688	SPLIIFADCDMDK	0.647375	13
>tr|A0A6P7T656|A0A6P7T656_OCTVU Aconitate hydratase, mitochondrial OS=Octopus vulgaris OX=6645 GN=LOC115219777 PE=3 SV=1	808.439	809.024	1	6	MAYLLR	0.647055	6
>tr|A0A6P7U0P7|A0A6P7U0P7_OCTVU zinc finger ZZ-type and EF-hand domain-containing protein 1 OS=Octopus vulgaris OX=6645 GN=LOC115228010 PE=4 SV=1	1664.86	1666.13	2083	2096	LCMDLTWVMALLQK	0.646882	14
>tr|A0A6P7UBL9|A0A6P7UBL9_OCTVU fatty-acid amide hydrolase 2 isoform X2 OS=Octopus vulgaris OX=6645 GN=LOC115232529 PE=3 SV=1	3078.47	3080.53	163	189	SGVIPYVVTNISELCMWYESANNIYGR	0.646878	27
>tr|A0A7E6ESL5|A0A7E6ESL5_OCTVU prominin-1-A isoform X4 OS=Octopus vulgaris OX=6645 GN=LOC115210705 PE=3 SV=1	2761.48	2763.14	622	647	ILQNDLQVLAHNLSLVSNGALNDTAK	0.646714	26
>tr|A0A6P7TYN8|A0A6P7TYN8_OCTVU Protein disulfide-isomerase OS=Octopus vulgaris OX=6645 GN=LOC115231769 PE=3 SV=1	966.566	967.203	322	329	ILEFFGLK	0.646667	8
>tr|A0A6P7SE31|A0A6P7SE31_OCTVU 26S proteasome non-ATPase regulatory subunit 2 OS=Octopus vulgaris OX=6645 GN=LOC115211842 PE=3 SV=1	1373.76	1374.66	424	438	AGALLACGIVSSGVR	0.646555	15
>Cluster-58773.159728;orf1 len=257 frame:1 start:901 end:1671 gi|291224559|ref|XP_002732271.1| PREDICTED: methylmalonic aciduria and homocystinuria type C protein homolog [Saccoglossus kowalevskii]	1167.58	1168.37	85	95	GDLAPIDHCVK	0.645555	11
>tr|Q24925|Q24925_EUPSC Peroxidase-like protein (Fragment) OS=Euprymna scolopes OX=6613 PE=2 SV=1	864.407	865.067	470	477	AMEGGLMR	0.645472	8
>tr|A0A0L8GJH5|A0A0L8GJH5_OCTBM Pyruvate kinase OS=Octopus bimaculoides OX=37653 GN=OCBIM_22032473mg PE=3 SV=1	1805.93	1807.26	336	352	AGKPVICATQMLESMVK	0.645209	17
>tr|A0A6P7TWP3|A0A6P7TWP3_OCTVU chymotrypsin-like protease CTRL-1 OS=Octopus vulgaris OX=6645 GN=LOC115226866 PE=4 SV=2	863.364	863.867	152	158	DGNDTWR	0.645116	7
>tr|Q27Q56|Q27Q56_SEPOF Hemocyanin subunit 2 (Fragment) OS=Sepia officinalis OX=6610 PE=2 SV=1	2149.01	2150.37	1351	1367	SGRPYWDWVEPFDELPR	0.644039	17
>tr|A0A6P7SDN6|A0A6P7SDN6_OCTVU gelsolin-like protein 2 OS=Octopus vulgaris OX=6645 GN=LOC115211664 PE=4 SV=1	1019.45	1020.22	351	360	CPDLDVALCA	0.644026	10
>tr|A0A7E6ETN4|A0A7E6ETN4_OCTVU protein-glutamine gamma-glutamyltransferase K OS=Octopus vulgaris OX=6645 GN=LOC115211974 PE=3 SV=1	1915.96	1917.18	344	360	SPLAWTGSAAIFQEYFK	0.643714	17
>tr|A0A6P7S965|A0A6P7S965_OCTVU ras GTPase-activating protein-binding protein 2 OS=Octopus vulgaris OX=6645 GN=LOC115210285 PE=4 SV=1	1128.59	1129.23	448	459	AGIRPSSGGGNR	0.643657	12
>tr|A0A7E6EHE9|A0A7E6EHE9_OCTVU prosaposin isoform X1 OS=Octopus vulgaris OX=6645 GN=LOC115209891 PE=4 SV=1	1607.66	1608.91	96	108	IGYYMDSMCSYFK	0.643453	13
>tr|A0A0L8FKC8|A0A0L8FKC8_OCTBM 26S proteasome regulatory subunit 7 OS=Octopus bimaculoides OX=37653 GN=OCBIM_22017212mg PE=3 SV=1	1710.85	1711.99	270	285	ACIIFFDEIDAIGGAR	0.64342	16
>tr|A0A7E6FQN6|A0A7E6FQN6_OCTVU insulin-like growth factor-binding protein complex acid labile subunit isoform X7 OS=Octopus vulgaris OX=6645 GN=LOC115225305 PE=4 SV=1	1047.55	1048.19	123	131	AFDELPSLR	0.643385	9
>tr|A0A7E6EY74|A0A7E6EY74_OCTVU twitchin OS=Octopus vulgaris OX=6645 GN=LOC115213975 PE=3 SV=1	858.348	859.017	1542	1549	DAGMYACK	0.643361	8
>tr|F0V3W2|F0V3W2_LEPCI Hemocyanin (Fragment) OS=Lepidochitona cinerea OX=256056 PE=2 SV=1	1071.6	1072.32	1481	1490	TANCAIPLLR	0.643244	10
>tr|A0A6P7TSR4|A0A6P7TSR4_OCTVU Carboxypeptidase OS=Octopus vulgaris OX=6645 GN=LOC115226095 PE=3 SV=1	1229.56	1230.39	249	260	TPSAQCGFYAGK	0.643236	12
>tr|A0A077B6R8|A0A077B6R8_EUPSC Hemocyanin subunit 1 OS=Euprymna scolopes OX=6613 GN=HCY1 PE=2 SV=1	2225.99	2227.43	2449	2468	EGSHFSVLGGSTEMPWSFDR	0.643008	20
>tr|A0A077B6R8|A0A077B6R8_EUPSC Hemocyanin subunit 1 OS=Euprymna scolopes OX=6613 GN=HCY1 PE=2 SV=1	1412.79	1413.71	2086	2097	LFHDPSIIFVPK	0.642962	12
>tr|A0A7E6ETD0|A0A7E6ETD0_OCTVU adenylyl cyclase-associated protein 1 isoform X4 OS=Octopus vulgaris OX=6645 GN=LOC115210264 PE=3 SV=1	815.477	815.997	326	332	AWINALK	0.642956	7
>tr|A0A0L8FKC8|A0A0L8FKC8_OCTBM 26S proteasome regulatory subunit 7 OS=Octopus bimaculoides OX=37653 GN=OCBIM_22017212mg PE=3 SV=1	825.392	825.968	234	240	TDACFIR	0.642938	7
>Cluster-58773.88130;orf1 len=870 frame:3 start:327 end:2936 gi|762145751|ref|XP_011456155.1| PREDICTED: puromycin-sensitive aminopeptidase-like [Crassostrea gigas]	1066.51	1067.26	779	786	EMAWQFVR	0.642934	8
>tr|A0A6P7SGA6|A0A6P7SGA6_OCTVU Clathrin heavy chain OS=Octopus vulgaris OX=6645 GN=LOC115212844 PE=3 SV=1	1456.78	1457.72	509	520	VGYTPDYIFLLR	0.64277	12
>tr|A0A6P7TGA0|A0A6P7TGA0_OCTVU Isocitrate dehydrogenase [NADP] OS=Octopus vulgaris OX=6645 GN=LOC115223822 PE=3 SV=1	900.465	901.122	205	211	MTIFNFK	0.642544	7
>tr|A0A7E6EY74|A0A7E6EY74_OCTVU twitchin OS=Octopus vulgaris OX=6645 GN=LOC115213975 PE=3 SV=1	1054.53	1055.19	2858	2865	INFDYLNR	0.642488	8
>tr|A0A6P7T9M7|A0A6P7T9M7_OCTVU Transgelin OS=Octopus vulgaris OX=6645 GN=LOC115221527 PE=3 SV=1	1328.64	1329.53	383	395	FASQAGMSFGAVR	0.642285	13
>tr|A0A6P7SVM2|A0A6P7SVM2_OCTVU Spectrin beta chain OS=Octopus vulgaris OX=6645 GN=LOC115216977 PE=3 SV=1	1801.96	1803.15	1162	1176	QQLLSQSLNLQMFLR	0.642209	15
>tr|A0A6P7U0P7|A0A6P7U0P7_OCTVU zinc finger ZZ-type and EF-hand domain-containing protein 1 OS=Octopus vulgaris OX=6645 GN=LOC115228010 PE=4 SV=1	2620.26	2622.06	1952	1973	TEHWNPVVVNCLYECISPLFEK	0.641928	22
>tr|A0A7E6EY74|A0A7E6EY74_OCTVU twitchin OS=Octopus vulgaris OX=6645 GN=LOC115213975 PE=3 SV=1	1599.64	1600.73	1356	1371	NAGPGDEAEYSCVCGK	0.641661	16
>tr|A0A6P7TRV9|A0A6P7TRV9_OCTVU Ubiquitin-activating enzyme E1 OS=Octopus vulgaris OX=6645 GN=LOC115225288 PE=3 SV=1	2272.21	2273.66	328	346	FDRPPLLHLAFQALDEYVK	0.641527	19
>Cluster-58773.136028;orf1 len=262 frame:2 start:116 end:901 gi|291233326|ref|XP_002736601.1| PREDICTED: UPF0462 protein C4orf33 homolog [Saccoglossus kowalevskii]	927.457	928.039	72	79	QWDGTPLK	0.641481	8
>tr|A0A7E6FT44|A0A7E6FT44_OCTVU 4-hydroxyphenylpyruvate dioxygenase OS=Octopus vulgaris OX=6645 GN=LOC115226087 PE=3 SV=1	1045.44	1046.15	31	39	QAASYYCTR	0.641169	9
>tr|A0A0L8HB35|A0A0L8HB35_OCTBM CCT-beta OS=Octopus bimaculoides OX=37653 GN=OCBIM_22018710mg PE=3 SV=1	1059.52	1060.23	287	295	HGCNVFINR	0.640972	9
>tr|A0A6P7SI10|A0A6P7SI10_OCTVU CD109 antigen isoform X2 OS=Octopus vulgaris OX=6645 GN=LOC115213260 PE=4 SV=1	835.42	835.938	760	766	DESFPLK	0.640143	7
>tr|A0A0L8FXZ4|A0A0L8FXZ4_OCTBM Uncharacterized protein OS=Octopus bimaculoides OX=37653 GN=OCBIM_22004572mg PE=4 SV=1	1975.84	1977.2	646	663	SYGAWSAWTACVDGQMSR	0.639765	18
>Cluster-58773.109972;orf1 len=856 frame:2 start:89 end:2656 gi|762142591|ref|XP_011454520.1| PREDICTED: inter-alpha-trypsin inhibitor heavy chain H3-like [Crassostrea gigas]	1958.9	1960.25	417	434	EANEQISLFALCFGADCK	0.638782	18
>tr|A0A6P7TFA3|A0A6P7TFA3_OCTVU Polyol dehydrogenase OS=Octopus vulgaris OX=6645 GN=LOC115223465 PE=3 SV=1	2492.24	2493.82	138	161	LPDNVSTEDGALLEPLSVGVHACR	0.638624	24
>tr|A0A7E6EZI8|A0A7E6EZI8_OCTVU uncharacterized protein LOC115214248 OS=Octopus vulgaris OX=6645 GN=LOC115214248 PE=4 SV=1	1188.51	1189.3	6497	6506	SGQMSYSWSR	0.638595	10
>tr|A0A6P7T0G1|A0A6P7T0G1_OCTVU Phosphoglycerate kinase OS=Octopus vulgaris OX=6645 GN=LOC115218470 PE=3 SV=1	3382.58	3384.79	90	121	SVTFLSDCVGPETEAACSDPEPGSVFLLENLR	0.638489	32
>tr|A0A6P7SIX4|A0A6P7SIX4_OCTVU Inorganic diphosphatase OS=Octopus vulgaris OX=6645 GN=LOC115213471 PE=3 SV=2	3018.66	3020.59	142	168	LTSLSPLLQLLHQLHSLSLFSCGVQQR	0.638228	27
>tr|A0A6P7SGA6|A0A6P7SGA6_OCTVU Clathrin heavy chain OS=Octopus vulgaris OX=6645 GN=LOC115212844 PE=3 SV=1	1978.97	1980.44	1590	1605	HNILDFAMPYMIQVMR	0.637883	16
>tr|A0A6P7UBL9|A0A6P7UBL9_OCTVU fatty-acid amide hydrolase 2 isoform X2 OS=Octopus vulgaris OX=6645 GN=LOC115232529 PE=3 SV=1	968.389	969.027	190	197	SCNPYDNR	0.637709	8
>Cluster-58773.74875;orf1 len=741 frame:2 start:1832 end:4054 gi|159006|gb|AAA16244.1| peroxidase-like protein, partial [Euprymna scolopes]	1424.62	1425.69	716	729	VCLGPTDGLCSCEK	0.637291	14
>tr|A0A7E6FFI6|A0A7E6FFI6_OCTVU chorion peroxidase-like OS=Octopus vulgaris OX=6645 GN=LOC115221248 PE=4 SV=1	1424.62	1425.69	608	621	VCLGPTDGLCSCEK	0.637291	14
>Cluster-58773.201330;orf1 len=134 frame:-1 start:402 end:1 gi|540357470|gb|AGV08297.1| 17beta-HSD14 [Azumapecten farreri]	1600.72	1601.85	62	75	MGPGEAYYINCNLR	0.637179	14
>Cluster-58773.88130;orf1 len=870 frame:3 start:327 end:2936 gi|762145751|ref|XP_011456155.1| PREDICTED: puromycin-sensitive aminopeptidase-like [Crassostrea gigas]	1312.69	1313.55	250	260	SYFNIAYPLPK	0.637064	11
>tr|A0A7E6FUS0|A0A7E6FUS0_OCTVU Annexin OS=Octopus vulgaris OX=6645 GN=LOC115226900 PE=3 SV=1	821.43	821.96	70	75	NFYHLK	0.636634	6
>tr|A0A0L8IH79|A0A0L8IH79_OCTBM Uncharacterized protein OS=Octopus bimaculoides OX=37653 GN=OCBIM_22005008mg PE=3 SV=1	1544.71	1545.83	235	247	CEFQDALVLFCEK	0.636614	13
>tr|A0A6P7SI10|A0A6P7SI10_OCTVU CD109 antigen isoform X2 OS=Octopus vulgaris OX=6645 GN=LOC115213260 PE=4 SV=1	809.415	809.903	448	454	SSPYLSR	0.636386	7
>Cluster-58773.93343;orf1 len=501 frame:1 start:1 end:1503 gi|762076444|ref|XP_011445523.1| PREDICTED: xylose isomerase-like [Crassostrea gigas] >Cluster-58773.93344;orf1 len=501 frame:1 start:1 end:1503 gi|762076444|ref|XP_011445523.1| PREDICTED: xylose isomerase-like [Crassostrea gigas]	1842.99	1844.18	36	52	LPAFSHGSFNPPFVVVK	0.635851	17
>tr|A0A6P7ST76|A0A6P7ST76_OCTVU elongation factor 1-beta OS=Octopus vulgaris OX=6645 GN=LOC115216350 PE=3 SV=1	1322.64	1323.52	164	176	SVSCDGLLWGASK	0.635392	13
>tr|A0A6P7SLL4|A0A6P7SLL4_OCTVU Glutathione S-transferase omega OS=Octopus vulgaris OX=6645 GN=LOC115214295 PE=3 SV=1	1651.78	1652.81	174	186	NFEIPSDIDWYPR	0.634685	13
>Cluster-141421.4;orf1 len=365 frame:2 start:2 end:1096 gi|470476037|ref|XP_004342217.1| hypothetical protein ACA1_115170 [Acanthamoeba castellanii str. Neff]>gi|440799046|gb|ELR20107.1| hypothetical protein ACA1_115170 [Acanthamoeba castellanii str. Neff]	1547.71	1548.73	174	187	GWACEQAFGSHVQK	0.633638	14
>tr|A0A0L8HFB4|A0A0L8HFB4_OCTBM Pacifastin domain-containing protein OS=Octopus bimaculoides OX=37653 GN=OCBIM_22015839mg PE=4 SV=1	1385.6	1386.73	224	237	CICGATGQAVCTMK	0.63314	14
>tr|A0A0L8HJQ8|A0A0L8HJQ8_OCTBM Peptidase M20 domain-containing protein 2 OS=Octopus bimaculoides OX=37653 GN=OCBIM_22013224mg PE=3 SV=1	1057.52	1058.25	216	223	QQMKPTWR	0.632997	8
>tr|Q24925|Q24925_EUPSC Peroxidase-like protein (Fragment) OS=Euprymna scolopes OX=6613 PE=2 SV=1	1649.84	1650.85	602	617	NGFASAGIIYSHSGLR	0.632944	16
>tr|A0A0L8IEQ2|A0A0L8IEQ2_OCTBM T-complex protein 1 subunit delta OS=Octopus bimaculoides OX=37653 GN=OCBIM_22015514mg PE=3 SV=1	1315.74	1316.66	238	249	IGLIQFCISPPK	0.632719	12
>tr|A0A077B6R8|A0A077B6R8_EUPSC Hemocyanin subunit 1 OS=Euprymna scolopes OX=6613 GN=HCY1 PE=2 SV=1	1534.79	1535.75	1002	1015	APSANLFEKPEFGK	0.632699	14
>tr|Q27Q56|Q27Q56_SEPOF Hemocyanin subunit 2 (Fragment) OS=Sepia officinalis OX=6610 PE=2 SV=1	2007.94	2009.31	2179	2195	HGATVGVPYWDWTYPMK	0.632658	17
>tr|A0A077B6R8|A0A077B6R8_EUPSC Hemocyanin subunit 1 OS=Euprymna scolopes OX=6613 GN=HCY1 PE=2 SV=1	2007.94	2009.31	2196	2212	HGATVGVPYWDWTYPMK	0.632658	17
>tr|A0A6P7SP60|A0A6P7SP60_OCTVU peroxiredoxin-2 OS=Octopus vulgaris OX=6645 GN=LOC115215062 PE=3 SV=1	969.471	970.139	107	115	IASDYGCLK	0.632476	9
>tr|A0A6P7TYT0|A0A6P7TYT0_OCTVU Histidine--tRNA ligase OS=Octopus vulgaris OX=6645 GN=LOC115230998 PE=3 SV=2	1080.49	1081.31	410	418	ICCELWDAK	0.631949	9
>tr|A0A7E6EUH0|A0A7E6EUH0_OCTVU crystallin J1A OS=Octopus vulgaris OX=6645 GN=LOC115212045 PE=4 SV=1	2186.98	2188.38	64	80	SDWEFWEPSQNPFYVQK	0.631592	17
>Cluster-58773.132244;orf1 len=954 frame:2 start:176 end:3037 gi|159006|gb|AAA16244.1| peroxidase-like protein, partial [Euprymna scolopes]	836.39	836.885	376	382	SNTPFDR	0.631583	7
>tr|A0A0L8FXZ4|A0A0L8FXZ4_OCTBM Uncharacterized protein OS=Octopus bimaculoides OX=37653 GN=OCBIM_22004572mg PE=4 SV=1	836.39	836.885	61	67	SNTPFDR	0.631583	7
>Cluster-58773.83035;orf1 len=470 frame:3 start:477 end:1886 gi|554820859|ref|XP_005921157.1| PREDICTED: thymidine phosphorylase-like isoform X1 [Haplochromis burtoni]	1404.83	1405.8	52	64	AQIGALLMAIYLK	0.630882	13
>tr|A0A6P7TRV9|A0A6P7TRV9_OCTVU Ubiquitin-activating enzyme E1 OS=Octopus vulgaris OX=6645 GN=LOC115225288 PE=3 SV=1	1571.8	1572.94	476	490	YFLVGAGAIGCEMLK	0.630707	15
>tr|A0A6P7T914|A0A6P7T914_OCTVU thyroglobulin isoform X2 OS=Octopus vulgaris OX=6645 GN=LOC115220711 PE=4 SV=1	2174.01	2175.53	167	186	IPGFQSAIHNIQGMNCNCAR	0.630602	20
>tr|A0A7E6EZ05|A0A7E6EZ05_OCTVU Vinculin OS=Octopus vulgaris OX=6645 GN=LOC115214348 PE=3 SV=1	1088.55	1089.27	343	353	GSSPQAMALAR	0.630595	11
>tr|A0A6P7SVM2|A0A6P7SVM2_OCTVU Spectrin beta chain OS=Octopus vulgaris OX=6645 GN=LOC115216977 PE=3 SV=1	2187.07	2188.49	1144	1161	LQALDGGWQELLQMWENR	0.630116	18
>tr|A0A812CD65|A0A812CD65_SEPPH Uncharacterized protein OS=Sepia pharaonis OX=158019 GN=SPHA_33819 PE=4 SV=1	1388.68	1389.56	2373	2384	VASFPSSLFDYR	0.629965	12
>tr|A0A6P7T245|A0A6P7T245_OCTVU trans-1,2-dihydrobenzene-1,2-diol dehydrogenase isoform X1 OS=Octopus vulgaris OX=6645 GN=LOC115218668 PE=4 SV=1	3501.7	3504.07	3	35	WGICSPGLIANDFCNALQCLNPSEHTITAVVSK	0.629947	33
>tr|A0A6P7SEM8|A0A6P7SEM8_OCTVU Alpha-mannosidase OS=Octopus vulgaris OX=6645 GN=LOC115211875 PE=3 SV=1	1384.7	1385.57	169	180	VAWQIDPFGHSK	0.629532	12
>Cluster-58773.122645;orf1 len=203 frame:1 start:178 end:786 gi|481054003|gb|AGJ98458.1| glutathione-S-transferase [Sepiella maindroni]	1981.04	1982.36	90	106	IDEIIDCFLDIFNALVK	0.629233	17
>tr|A0A6P7U2G4|A0A6P7U2G4_OCTVU uncharacterized protein LOC115232424 OS=Octopus vulgaris OX=6645 GN=LOC115232424 PE=4 SV=1	1155.68	1156.42	52	61	QKPIIEGFLK	0.628364	10
>Cluster-58773.155745;orf1 len=271 frame:1 start:403 end:1215 gi|443706878|gb|ELU02754.1| hypothetical protein CAPTEDRAFT_117881, partial [Capitella teleta]	2175.09	2176.4	70	89	SLDDKPDDTPKPGLGSLYTR	0.628285	20
>tr|F0V3W2|F0V3W2_LEPCI Hemocyanin (Fragment) OS=Lepidochitona cinerea OX=256056 PE=2 SV=1	1522.77	1523.74	464	477	GYEYIAGFHGLPAK	0.628064	14
>tr|A0A6P7U0P7|A0A6P7U0P7_OCTVU zinc finger ZZ-type and EF-hand domain-containing protein 1 OS=Octopus vulgaris OX=6645 GN=LOC115228010 PE=4 SV=1	1391.73	1392.68	2539	2550	DIWAHLVHVACK	0.627924	12
>tr|A0A6P7SYF3|A0A6P7SYF3_OCTVU retinal dehydrogenase 1 OS=Octopus vulgaris OX=6645 GN=LOC115217862 PE=3 SV=1	1505.7	1506.73	139	151	TIPVDGDFFCYTK	0.627601	13
>tr|A0A6P7SYF5|A0A6P7SYF5_OCTVU retinal dehydrogenase 2 OS=Octopus vulgaris OX=6645 GN=LOC115217865 PE=3 SV=1	1505.7	1506.73	140	152	TIPVDGDFFCYTK	0.627601	13
>sp|Q06331|TBA_ENTDO Tubulin alpha chain OS=Enteroctopus dofleini OX=267067 PE=2 SV=1	887.433	888.08	395	401	FDLMYAK	0.627018	7
>tr|A0A0L8HN06|A0A0L8HN06_OCTBM Tubulin alpha chain OS=Octopus bimaculoides OX=37653 GN=OCBIM_22010928mg PE=3 SV=1	887.433	888.08	395	401	FDLMYAK	0.627018	7
>tr|R9WBT1|R9WBT1_OCTBM 14-3-3 protein epsilon OS=Octopus bimaculoides OX=37653 PE=2 SV=1	1045.58	1046.22	162	170	DLPPTHPIR	0.626991	9
>Cluster-58773.13946;orf1 len=533 frame:1 start:406 end:2004 gi|260800011|ref|XP_002594930.1| hypothetical protein BRAFLDRAFT_209115 [Branchiostoma floridae]>gi|229280168|gb|EEN50941.1| hypothetical protein BRAFLDRAFT_209115 [Branchiostoma floridae]	901.453	902.003	484	491	SVAAPWDR	0.626966	8
>tr|A0A6P7U7W9|A0A6P7U7W9_OCTVU putative aminopeptidase W07G4.4 isoform X1 OS=Octopus vulgaris OX=6645 GN=LOC115232621 PE=3 SV=1	1756.91	1758.06	459	475	GHQTPAAFLILASGMDK	0.626741	17
>tr|A0A6P7SYQ3|A0A6P7SYQ3_OCTVU pancreatic triacylglycerol lipase-like OS=Octopus vulgaris OX=6645 GN=LOC115217380 PE=3 SV=1	894.396	895.097	285	292	AAFMCSHK	0.626588	8
>tr|A0A7E6EGR4|A0A7E6EGR4_OCTVU short-chain collagen C4-like OS=Octopus vulgaris OX=6645 GN=LOC118760927 PE=4 SV=1	2159.06	2160.36	8	27	SLDDKPDDTPKPGPGSLYTR	0.626083	20
>Cluster-116787.2;orf1 len=297 frame:-3 start:1585 end:695 gi|156313314|ref|XP_001617862.1| hypothetical protein NEMVEDRAFT_v1g225725 [Nematostella vectensis]>gi|156196177|gb|EDO25762.1| predicted protein [Nematostella vectensis]	1977.1	1978.42	1	18	CWVIPLTPPVLVVNSSPR	0.625906	18
>tr|A0A0L8HFB4|A0A0L8HFB4_OCTBM Pacifastin domain-containing protein OS=Octopus bimaculoides OX=37653 GN=OCBIM_22015839mg PE=4 SV=1	1898.81	1900.12	54	70	FCPPNHSGYSGEVCHHK	0.625805	17
>tr|A0A7E6EZI8|A0A7E6EZI8_OCTVU uncharacterized protein LOC115214248 OS=Octopus vulgaris OX=6645 GN=LOC115214248 PE=4 SV=1	1464.71	1465.62	728	740	FDEAGNSFSHLLK	0.625663	13
>tr|W6CNR9|W6CNR9_SEPOF Hemocyanin subunit 3 OS=Sepia officinalis OX=6610 PE=2 SV=1	957.54	958.152	1812	1819	IEPNPFLK	0.625624	8
>tr|A0A7E6FRZ6|A0A7E6FRZ6_OCTVU hemocyanin G-type, units Oda to Odg-like OS=Octopus vulgaris OX=6645 GN=LOC115225590 PE=4 SV=1	2548.28	2549.99	1504	1526	LPYNSANCALGLLNQPMRPFSNK	0.625021	23
>tr|I0JGT9|I0JGT9_SEPOF Actin I OS=Sepia officinalis OX=6610 GN=ACTI PE=2 SV=1 >tr|A0A0L8HIZ8|A0A0L8HIZ8_OCTBM Uncharacterized protein OS=Octopus bimaculoides OX=37653 GN=OCBIM_22013417mg PE=3 SV=1 >tr|A0A6P7U2X7|A0A6P7U2X7_OCTVU actin, adductor muscle OS=Octopus vulgaris OX=6645 GN=LOC115232513 PE=3 SV=1	1198.71	1199.45	30	40	AVFPSIVGRPR	0.62478	11
>tr|A0A6P7SKQ4|A0A6P7SKQ4_OCTVU actin, cytoplasmic OS=Octopus vulgaris OX=6645 GN=LOC115214120 PE=3 SV=1	1198.71	1199.45	29	39	AVFPSIVGRPR	0.62478	11
>tr|A0A812CKE2|A0A812CKE2_SEPPH ACTB_G1 OS=Sepia pharaonis OX=158019 GN=SPHA_36281 PE=3 SV=1	1198.71	1199.45	30	40	AVFPSIVGRPR	0.62478	11
>tr|A0A7E6FFI6|A0A7E6FFI6_OCTVU chorion peroxidase-like OS=Octopus vulgaris OX=6645 GN=LOC115221248 PE=4 SV=1	2217.06	2218.57	1	21	MLLATCSFTTPITCDPDSLYR	0.624203	21
>Cluster-58773.148525;orf1 len=812 frame:2 start:422 end:2857 gi|676447145|ref|XP_009051312.1| hypothetical protein LOTGIDRAFT_201834 [Lottia gigantea]>gi|556109335|gb|ESO97987.1| hypothetical protein LOTGIDRAFT_201834 [Lottia gigantea]	1554.77	1555.85	45	56	IYYISLEFYMGR	0.624063	12
>Cluster-58773.132244;orf1 len=954 frame:2 start:176 end:3037 gi|159006|gb|AAA16244.1| peroxidase-like protein, partial [Euprymna scolopes]	1279.61	1280.39	754	764	DNGLPSYTAWR	0.623954	11
>tr|A0A0L8HXN5|A0A0L8HXN5_OCTBM SGL domain-containing protein OS=Octopus bimaculoides OX=37653 GN=OCBIM_22003174mg PE=4 SV=1	1512.82	1513.81	42	55	NDKPAGQILCVNLK	0.623899	14
>tr|A0A6P7T402|A0A6P7T402_OCTVU uncharacterized HIT-like protein Synpcc7942_1390 OS=Octopus vulgaris OX=6645 GN=LOC115219148 PE=4 SV=1	1211.75	1212.53	49	59	QAPVHILIIPK	0.623884	11
>tr|A0A0L8G5K6|A0A0L8G5K6_OCTBM Uncharacterized protein OS=Octopus bimaculoides OX=37653 GN=OCBIM_22000375mg PE=4 SV=1	1822.93	1824.12	512	526	LAQNLQICQFNFDLR	0.623737	15
>tr|A0A6P7TGA0|A0A6P7TGA0_OCTVU Isocitrate dehydrogenase [NADP] OS=Octopus vulgaris OX=6645 GN=LOC115223822 PE=3 SV=1	1832.93	1834.05	359	375	GNPTSTNPIASIFAWTR	0.623357	17
>tr|A0A6P7T5D5|A0A6P7T5D5_OCTVU Aspartate aminotransferase OS=Octopus vulgaris OX=6645 GN=LOC115219838 PE=3 SV=1	933.556	934.176	371	377	FHIYLIK	0.623325	7
>tr|A0A6P7TXK0|A0A6P7TXK0_OCTVU medium-chain specific acyl-CoA dehydrogenase, mitochondrial OS=Octopus vulgaris OX=6645 GN=LOC115228127 PE=3 SV=1	2862.38	2864.42	300	326	TMGQPICTHQAVAFMLADMAIGIESAR	0.623292	27
>tr|A0A0L8GLX8|A0A0L8GLX8_OCTBM S-formylglutathione hydrolase OS=Octopus bimaculoides OX=37653 GN=OCBIM_22031609mg PE=3 SV=1	1796.95	1798.13	145	162	SIFGHSMGGHGALTIALK	0.623031	18
>tr|A0A7E6FDU1|A0A7E6FDU1_OCTVU Glucose-6-phosphate 1-dehydrogenase OS=Octopus vulgaris OX=6645 GN=LOC115220357 PE=3 SV=1	1577.81	1578.78	373	385	IQFQDVPSNIFNR	0.622753	13
>tr|A0A0L8G0V9|A0A0L8G0V9_OCTBM Uncharacterized protein OS=Octopus bimaculoides OX=37653 GN=OCBIM_22003270mg PE=3 SV=1	2245.14	2246.6	32	53	ESVGTVIGIDLGTTYSCVGVFK	0.622464	22
>tr|A0A6P7S5H1|A0A6P7S5H1_OCTVU Mannose-6-phosphate isomerase OS=Octopus vulgaris OX=6645 GN=LOC115209304 PE=3 SV=1	1981.05	1982.36	392	409	LQPGSVFFMSANEIVTLK	0.62226	18
>tr|A0A7E6ENX1|A0A7E6ENX1_OCTVU spectrin alpha chain isoform X2 OS=Octopus vulgaris OX=6645 GN=LOC115227715 PE=3 SV=1	1396.56	1397.54	1428	1439	DCEQAEAWMASR	0.621761	12
>tr|A0A6P7SRB2|A0A6P7SRB2_OCTVU acidic mammalian chitinase isoform X1 OS=Octopus vulgaris OX=6645 GN=LOC115215700 PE=3 SV=1	1588.72	1589.8	342	358	TCITPGCPSSGPNAAGR	0.621628	17
>tr|A0A0L8H1Z7|A0A0L8H1Z7_OCTBM CN hydrolase domain-containing protein OS=Octopus bimaculoides OX=37653 GN=OCBIM_22024094mg PE=4 SV=1	1559.81	1560.82	334	347	DGLLISEVDLNLCR	0.621599	14
>tr|A0A6P7SER3|A0A6P7SER3_OCTVU hemocyanin 1-like OS=Octopus vulgaris OX=6645 GN=LOC115212215 PE=4 SV=2	1520.85	1521.82	643	654	LWAVWQALQIHR	0.621166	12
>tr|A0A6P7SDC4|A0A6P7SDC4_OCTVU hemocyanin G-type, units Oda to Odg OS=Octopus vulgaris OX=6645 GN=LOC115211670 PE=4 SV=2	1520.85	1521.82	662	673	LWAVWQALQIHR	0.621166	12
>Cluster-58773.162319;orf1 len=2921 frame:3 start:24 end:8786 gi|16596797|gb|AAK28276.2| hemocyanin G-type [Enteroctopus dofleini]	1520.85	1521.82	666	677	LWAVWQALQIHR	0.621166	12
>tr|Q9BJ58|Q9BJ58_ENTDO Hemocyanin G-type (Fragment) OS=Enteroctopus dofleini OX=267067 PE=4 SV=2	1520.85	1521.82	667	678	LWAVWQALQIHR	0.621166	12
>tr|A0A6P7TQA6|A0A6P7TQA6_OCTVU Parkinson disease protein 7 homolog OS=Octopus vulgaris OX=6645 GN=LOC115224773 PE=4 SV=1	1157.66	1158.45	175	185	ADSLVAPMLLK	0.620939	11
>tr|A0A812CD65|A0A812CD65_SEPPH Uncharacterized protein OS=Sepia pharaonis OX=158019 GN=SPHA_33819 PE=4 SV=1	1318.64	1319.6	2569	2580	IAAYHGMPLSCR	0.620821	12
>tr|A0A0L8GUX3|A0A0L8GUX3_OCTBM Uncharacterized protein OS=Octopus bimaculoides OX=37653 GN=OCBIM_22027429mg PE=3 SV=1	1196.6	1197.41	251	261	VACIGAWHPSR	0.62071	11
>tr|A0A7E6F497|A0A7E6F497_OCTVU ATP-citrate synthase OS=Octopus vulgaris OX=6645 GN=LOC115216353 PE=3 SV=1	2207.13	2208.49	1032	1051	EEAQEYVEIGALNGLFVLGR	0.620291	20
>tr|A0A6P7SI10|A0A6P7SI10_OCTVU CD109 antigen isoform X2 OS=Octopus vulgaris OX=6645 GN=LOC115213260 PE=4 SV=1	1018.49	1019.15	214	221	DEAFVYFK	0.620265	8
>tr|A0A077B6R8|A0A077B6R8_EUPSC Hemocyanin subunit 1 OS=Euprymna scolopes OX=6613 GN=HCY1 PE=2 SV=1	2467.21	2468.88	256	277	GLPTRPNCGLNLFHNPMEPFGR	0.619918	22
>tr|A0A6P7TSR4|A0A6P7TSR4_OCTVU Carboxypeptidase OS=Octopus vulgaris OX=6645 GN=LOC115226095 PE=3 SV=1	882.41	882.957	160	166	FPEYNGR	0.619912	7
>tr|A0A7E6EY74|A0A7E6EY74_OCTVU twitchin OS=Octopus vulgaris OX=6645 GN=LOC115213975 PE=3 SV=1	1124.55	1125.24	3193	3201	DPHSNQWIK	0.619849	9
>tr|A0A7E6ENX1|A0A7E6ENX1_OCTVU spectrin alpha chain isoform X2 OS=Octopus vulgaris OX=6645 GN=LOC115227715 PE=3 SV=1	2800.18	2801.94	893	916	QDLDDSLQAQQYFADANEGESWMR	0.619807	24
>tr|A0A6P7TJB0|A0A6P7TJB0_OCTVU O-methyltransferase MdmC OS=Octopus vulgaris OX=6645 GN=LOC115222932 PE=3 SV=1	978.457	979.084	191	198	SGYVDYFK	0.619497	8
>tr|Q27Q56|Q27Q56_SEPOF Hemocyanin subunit 2 (Fragment) OS=Sepia officinalis OX=6610 PE=2 SV=1	1283.71	1284.61	1152	1162	VFISFMLEGLK	0.619389	11
>tr|A0A7E6EGR4|A0A7E6EGR4_OCTVU short-chain collagen C4-like OS=Octopus vulgaris OX=6645 GN=LOC118760927 PE=4 SV=1	1665.78	1666.93	104	118	SLHDHDVPCAVCLTR	0.619144	15
>tr|A0A7E6EZI8|A0A7E6EZI8_OCTVU uncharacterized protein LOC115214248 OS=Octopus vulgaris OX=6645 GN=LOC115214248 PE=4 SV=1	1004.51	1005.19	3662	3671	GGSLSPDIMK	0.618991	10
>tr|A0A6P7TXK0|A0A6P7TXK0_OCTVU medium-chain specific acyl-CoA dehydrogenase, mitochondrial OS=Octopus vulgaris OX=6645 GN=LOC115228127 PE=3 SV=1	1160.57	1161.27	332	341	SAWEIDNGIR	0.618924	10
>tr|A0A7E6EGR4|A0A7E6EGR4_OCTVU short-chain collagen C4-like OS=Octopus vulgaris OX=6645 GN=LOC118760927 PE=4 SV=1	1178.58	1179.33	65	74	DPIWANYTAK	0.618881	10
>Cluster-58773.74875;orf1 len=741 frame:2 start:1832 end:4054 gi|159006|gb|AAA16244.1| peroxidase-like protein, partial [Euprymna scolopes]	1787.87	1789.1	602	618	HMNGSNLGPTFACIIGR	0.618214	17
>tr|A0A7E6FFI6|A0A7E6FFI6_OCTVU chorion peroxidase-like OS=Octopus vulgaris OX=6645 GN=LOC115221248 PE=4 SV=1	1787.87	1789.1	494	510	HMNGSNLGPTFACIIGR	0.618214	17
>tr|A0A6P7S5H1|A0A6P7S5H1_OCTVU Mannose-6-phosphate isomerase OS=Octopus vulgaris OX=6645 GN=LOC115209304 PE=3 SV=1	2927.58	2929.54	352	378	IMLPGDVAQYQLRPLQNASICIVISGK	0.618049	27
>tr|A0A6P7SGA6|A0A6P7SGA6_OCTVU Clathrin heavy chain OS=Octopus vulgaris OX=6645 GN=LOC115212844 PE=3 SV=1	1333.66	1334.55	356	367	CNLPGAEDLFVR	0.617838	12
>tr|A0A6P7TYN8|A0A6P7TYN8_OCTVU Protein disulfide-isomerase OS=Octopus vulgaris OX=6645 GN=LOC115231769 PE=3 SV=1	819.497	820.026	223	229	DAIILFK	0.617421	7
>tr|A0A6P7SGA6|A0A6P7SGA6_OCTVU Clathrin heavy chain OS=Octopus vulgaris OX=6645 GN=LOC115212844 PE=3 SV=1	1700.88	1701.93	191	206	VSQPIEGHAAAFAQFK	0.617262	16
>Cluster-58773.104829;orf1 len=394 frame:3 start:15 end:1196 gi|524910869|ref|XP_005110308.1| PREDICTED: calumenin-like isoform X2 [Aplysia californica]	1079.53	1080.3	49	57	TFCFHSLPK	0.616484	9
>tr|A0A812DRM9|A0A812DRM9_SEPPH Hypothetical protein OS=Sepia pharaonis OX=158019 GN=SPHA_58637 PE=4 SV=1	1579.8	1580.92	270	283	QIMCSLLFNTSLAR	0.616127	14
>tr|A0A6P7U7W9|A0A6P7U7W9_OCTVU putative aminopeptidase W07G4.4 isoform X1 OS=Octopus vulgaris OX=6645 GN=LOC115232621 PE=3 SV=1	1253.7	1254.48	72	82	LIWSPTGPINR	0.616062	11
>tr|A0A6P7U0P7|A0A6P7U0P7_OCTVU zinc finger ZZ-type and EF-hand domain-containing protein 1 OS=Octopus vulgaris OX=6645 GN=LOC115228010 PE=4 SV=1	2161.89	2163.42	516	535	QSSSFYMPLCGCEGGQLEDK	0.615914	20
>tr|A0A0L8GC35|A0A0L8GC35_OCTBM N-acyl-L-amino-acid amidohydrolase OS=Octopus bimaculoides OX=37653 GN=OCBIM_22036825mg PE=3 SV=1	949.554	950.239	157	164	LGMQLFIK	0.615823	8
>tr|A0A7E6FT44|A0A7E6FT44_OCTVU 4-hydroxyphenylpyruvate dioxygenase OS=Octopus vulgaris OX=6645 GN=LOC115226087 PE=3 SV=1	1658.86	1660	289	301	FLTIPDMYYINLR	0.615741	13
>tr|A0A7E6EY74|A0A7E6EY74_OCTVU twitchin OS=Octopus vulgaris OX=6645 GN=LOC115213975 PE=3 SV=1	1332.75	1333.65	216	227	GKPMFTSKPAIR	0.615735	12
>tr|A0A6P7SI10|A0A6P7SI10_OCTVU CD109 antigen isoform X2 OS=Octopus vulgaris OX=6645 GN=LOC115213260 PE=4 SV=1	1839.91	1841.05	134	148	AQLDRPFYSSSQWVR	0.615554	15
>tr|A0A812CD65|A0A812CD65_SEPPH Uncharacterized protein OS=Sepia pharaonis OX=158019 GN=SPHA_33819 PE=4 SV=1	1527.74	1528.74	1318	1331	ISSFHGLPAQCPDR	0.615368	14
>tr|A0A7E6F497|A0A7E6F497_OCTVU ATP-citrate synthase OS=Octopus vulgaris OX=6645 GN=LOC115216353 PE=3 SV=1	946.441	947.064	965	972	SLNNPDMR	0.615349	8
>tr|A0A0L8GWF6|A0A0L8GWF6_OCTBM Uncharacterized protein OS=Octopus bimaculoides OX=37653 GN=OCBIM_22027193mg PE=4 SV=1	1990.83	1992.27	51	69	ACEENVAGIGEFFCEAACK	0.615138	19
>tr|A0A077B6R8|A0A077B6R8_EUPSC Hemocyanin subunit 1 OS=Euprymna scolopes OX=6613 GN=HCY1 PE=2 SV=1	1680.82	1681.99	1092	1106	GKPYNTANCAIEMLR	0.615031	15
>tr|A0A7E6EXQ9|A0A7E6EXQ9_OCTVU cytosolic non-specific dipeptidase isoform X2 OS=Octopus vulgaris OX=6645 GN=LOC115213823 PE=3 SV=1	1949.95	1951.22	268	286	HPCLSLHGIEGAFSEPGAK	0.614668	19
>tr|A0A7E6EY74|A0A7E6EY74_OCTVU twitchin OS=Octopus vulgaris OX=6645 GN=LOC115213975 PE=3 SV=1	837.337	837.826	3806	3812	DDDGPYR	0.614595	7
>tr|A0A6P7TG90|A0A6P7TG90_OCTVU Glutathione transferase OS=Octopus vulgaris OX=6645 GN=LOC115223852 PE=3 SV=1	1017.5	1018.16	4	11	QPELAYWK	0.614386	8
>tr|A0A6P7T4Z8|A0A6P7T4Z8_OCTVU opine dehydrogenase OS=Octopus vulgaris OX=6645 GN=LOC115219799 PE=4 SV=1	1737	1738.14	182	196	AYFPILPTIQYIIGK	0.614184	15
>tr|A0A7E6FD92|A0A7E6FD92_OCTVU insulin-degrading enzyme OS=Octopus vulgaris OX=6645 GN=LOC115219912 PE=3 SV=1	1359.64	1360.54	374	384	EFQSLSNMTFR	0.614145	11
>Cluster-58773.162759;orf1 len=276 frame:2 start:2 end:829 gi|524875728|ref|XP_005094588.1| PREDICTED: uncharacterized protein LOC101847027 isoform X1 [Aplysia californica]>gi|524875730|ref|XP_005094589.1| PREDICTED: uncharacterized protein LOC101847027 isoform X1 [Aplysia californica]	963.456	964.092	256	264	ESCDLALGR	0.613971	9
>tr|A0A6P7SGA6|A0A6P7SGA6_OCTVU Clathrin heavy chain OS=Octopus vulgaris OX=6645 GN=LOC115212844 PE=3 SV=1	1772.85	1774.08	207	222	MDGNQALSTLFCFAVR	0.613801	16
>tr|A0A6P7T8U5|A0A6P7T8U5_OCTVU uncharacterized protein LOC115221216 OS=Octopus vulgaris OX=6645 GN=LOC115221216 PE=4 SV=1	1749.93	1751.05	283	297	VAQQALEFFKPWASK	0.613786	15
>tr|A0A0L8FMS3|A0A0L8FMS3_OCTBM VWFC domain-containing protein OS=Octopus bimaculoides OX=37653 GN=OCBIM_22013879mg PE=4 SV=1	1705.68	1707.09	731	745	TMCEEDCICMPGFVK	0.613627	15
>tr|A0A0L8GSS4|A0A0L8GSS4_OCTBM AAA domain-containing protein OS=Octopus bimaculoides OX=37653 GN=OCBIM_22029167mg PE=3 SV=1 >tr|A0A6P7SHR1|A0A6P7SHR1_OCTVU 26S proteasome regulatory subunit 6B OS=Octopus vulgaris OX=6645 GN=LOC115213143 PE=3 SV=1	878.473	879.01	193	200	QIGIDPPR	0.613573	8
>tr|A0A6P7S417|A0A6P7S417_OCTVU chloride intracellular channel exc-4 OS=Octopus vulgaris OX=6645 GN=LOC115208761 PE=4 SV=1	954.512	955.214	198	204	TMIYLWK	0.612942	7
>tr|A0A812DRM9|A0A812DRM9_SEPPH Hypothetical protein OS=Sepia pharaonis OX=158019 GN=SPHA_58637 PE=4 SV=1	1503.74	1504.82	194	206	LCVLFCSTHPLDR	0.612885	13
>tr|A0A7E6ENX1|A0A7E6ENX1_OCTVU spectrin alpha chain isoform X2 OS=Octopus vulgaris OX=6645 GN=LOC115227715 PE=3 SV=1	1874.88	1876.17	2366	2381	DGQVSLQEYMAFMISR	0.612759	16
>tr|A0A7E6F497|A0A7E6F497_OCTVU ATP-citrate synthase OS=Octopus vulgaris OX=6645 GN=LOC115216353 PE=3 SV=1	1090.53	1091.18	377	386	GGPNYQEGLR	0.6123	10
>tr|A0A7E6ENX1|A0A7E6ENX1_OCTVU spectrin alpha chain isoform X2 OS=Octopus vulgaris OX=6645 GN=LOC115227715 PE=3 SV=1	809.434	810.012	154	159	LVQFMR	0.612185	6
>tr|A0A7E6FNE1|A0A7E6FNE1_OCTVU dystrophin isoform X4 OS=Octopus vulgaris OX=6645 GN=LOC115232614 PE=4 SV=1	1326.65	1327.49	1494	1503	FQRPYDFEPK	0.611822	10
>tr|A0A6P7TYN8|A0A6P7TYN8_OCTVU Protein disulfide-isomerase OS=Octopus vulgaris OX=6645 GN=LOC115231769 PE=3 SV=1	1068.54	1069.21	363	371	FVQDFLDGK	0.611614	9
>tr|A0A6P7TGA0|A0A6P7TGA0_OCTVU Isocitrate dehydrogenase [NADP] OS=Octopus vulgaris OX=6645 GN=LOC115223822 PE=3 SV=1	1026.54	1027.24	412	421	DLAGCIHGLK	0.611379	10
>tr|A0A0L8IEX1|A0A0L8IEX1_OCTBM Uncharacterized protein OS=Octopus bimaculoides OX=37653 GN=OCBIM_22014847mg PE=3 SV=1	810.414	810.933	64	69	QPYFQK	0.610787	6
>tr|A0A812CYT6|A0A812CYT6_SEPPH MYH OS=Sepia pharaonis OX=158019 GN=SPHA_42230 PE=3 SV=1	1311.64	1312.54	558	568	VDYSAQAWLMK	0.610563	11
>tr|A0A812E3Y7|A0A812E3Y7_SEPPH RAB11A OS=Sepia pharaonis OX=158019 GN=SPHA_67892 PE=4 SV=1	1102.57	1103.29	209	219	VGLDVNGGLCR	0.609993	11
>tr|A0A6P7T9M7|A0A6P7T9M7_OCTVU Transgelin OS=Octopus vulgaris OX=6645 GN=LOC115221527 PE=3 SV=1	879.418	880.082	308	316	GMSCIGGVR	0.60963	9
>tr|F0V3W2|F0V3W2_LEPCI Hemocyanin (Fragment) OS=Lepidochitona cinerea OX=256056 PE=2 SV=1	1256.71	1257.53	1464	1473	LWAIWQALQK	0.609491	10
>tr|A0A7E6EUH0|A0A7E6EUH0_OCTVU crystallin J1A OS=Octopus vulgaris OX=6645 GN=LOC115212045 PE=4 SV=1	1046.55	1047.27	134	142	TIPITGCWR	0.609041	9
>tr|A0A6P7SIX4|A0A6P7SIX4_OCTVU Inorganic diphosphatase OS=Octopus vulgaris OX=6645 GN=LOC115213471 PE=3 SV=2	1627.69	1628.69	69	85	ASCYNNNLSNGGGSGGR	0.60887	17
>tr|A0A6P7SPL2|A0A6P7SPL2_OCTVU glycogenin-1 isoform X2 OS=Octopus vulgaris OX=6645 GN=LOC115215187 PE=4 SV=1	1960.93	1962.14	158	175	TEGSFDGGDQGLLNLYFK	0.608622	18
>tr|A0A0L8HJ80|A0A0L8HJ80_OCTBM Major vault protein OS=Octopus bimaculoides OX=37653 GN=OCBIM_22013292mg PE=4 SV=1	1510.76	1511.73	104	116	FTQSPFPLYPGEK	0.607395	13
>Cluster-58773.192724;orf1 len=110 frame:1 start:409 end:738 gi|340369254|ref|XP_003383163.1| PREDICTED: thioredoxin-like [Amphimedon queenslandica]	1063.56	1064.3	72	81	AGIQAMPTFK	0.607364	10
>tr|A0A7E6FE51|A0A7E6FE51_OCTVU filamin-A isoform X1 OS=Octopus vulgaris OX=6645 GN=LOC115220251 PE=3 SV=1	935.483	936.059	1206	1214	SGPYDIGVK	0.60688	9
>tr|A0A7E6EUU3|A0A7E6EUU3_OCTVU apoptosis-inducing factor 3 isoform X1 OS=Octopus vulgaris OX=6645 GN=LOC115213836 PE=4 SV=1	845.423	846.042	567	573	IACFYTK	0.60628	7
>tr|A0A7E6ENX1|A0A7E6ENX1_OCTVU spectrin alpha chain isoform X2 OS=Octopus vulgaris OX=6645 GN=LOC115227715 PE=3 SV=1	873.392	874.012	584	589	YQMFER	0.606231	6
>tr|A0A7E6EZI8|A0A7E6EZI8_OCTVU uncharacterized protein LOC115214248 OS=Octopus vulgaris OX=6645 GN=LOC115214248 PE=4 SV=1	1139.57	1140.29	5391	5399	YPELSFDLR	0.60621	9
>tr|A0A6P7TPW3|A0A6P7TPW3_OCTVU 2-phospho-D-glycerate hydro-lyase OS=Octopus vulgaris OX=6645 GN=LOC115224300 PE=3 SV=1	1428.82	1429.78	106	120	LGANAILGVSLAVCK	0.60576	15
>tr|A0A6P7SZ60|A0A6P7SZ60_OCTVU aldehyde dehydrogenase, mitochondrial OS=Octopus vulgaris OX=6645 GN=LOC115217872 PE=3 SV=1	1383.8	1384.73	200	213	LGPALALGNTVVMK	0.605733	14
>Cluster-58773.74875;orf1 len=741 frame:2 start:1832 end:4054 gi|159006|gb|AAA16244.1| peroxidase-like protein, partial [Euprymna scolopes]	1454.67	1455.64	349	361	VPDNFCFITGDAR	0.605531	13
>tr|A0A6P7SB76|A0A6P7SB76_OCTVU epidermal retinol dehydrogenase 2 isoform X1 OS=Octopus vulgaris OX=6645 GN=LOC115210961 PE=3 SV=1	1229.65	1230.48	260	269	CNTHILYIPR	0.605484	10
>tr|A0A6P7TGA0|A0A6P7TGA0_OCTVU Isocitrate dehydrogenase [NADP] OS=Octopus vulgaris OX=6645 GN=LOC115223822 PE=3 SV=1	1025.51	1026.25	242	249	WPLYMSTK	0.605359	8
>Cluster-58773.168901;orf1 len=432 frame:1 start:457 end:1752 gi|762151209|ref|XP_011413584.1| PREDICTED: aspartate aminotransferase, mitochondrial-like, partial [Crassostrea gigas] >Cluster-58773.168923;orf1 len=432 frame:2 start:548 end:1843 gi|762151209|ref|XP_011413584.1| PREDICTED: aspartate aminotransferase, mitochondrial-like, partial [Crassostrea gigas]	1591.68	1592.8	187	201	TCGFDFAGAMEDISK	0.605084	15
>tr|A0A6P7SVJ8|A0A6P7SVJ8_OCTVU Arginase OS=Octopus vulgaris OX=6645 GN=LOC115216860 PE=3 SV=1	1605.8	1606.86	9	21	TFCNHLLNNFINR	0.605053	13
>Cluster-58773.160867;orf1 len=179 frame:2 start:515 end:1051 sp|P42577|FRIS_LYMST Soma ferritin OS=Lymnaea stagnalis PE=2 SV=2 >Cluster-58773.160851;orf1 len=179 frame:-1 start:709 end:173 gi|4768842|gb|AAD29639.1|AF117271_1 ferritin [Enteroctopus dofleini]	822.323	822.943	8	14	MCDSNPR	0.604702	7
>tr|A0A6P7T7L0|A0A6P7T7L0_OCTVU heat shock cognate 71 kDa protein OS=Octopus vulgaris OX=6645 GN=LOC115220772 PE=3 SV=1	1835.96	1837.14	78	93	FTDDVVVADALLWPFK	0.60469	16
>tr|A0A0L8GKZ1|A0A0L8GKZ1_OCTBM Helicase C-terminal domain-containing protein OS=Octopus bimaculoides OX=37653 GN=OCBIM_22031992mg PE=4 SV=1	1820.83	1822.08	507	523	YSFTLASGTGLCCDNIR	0.604271	17
>tr|A0A6P7SZ60|A0A6P7SZ60_OCTVU aldehyde dehydrogenase, mitochondrial OS=Octopus vulgaris OX=6645 GN=LOC115217872 PE=3 SV=1	996.453	997.061	169	176	GDHFTYTR	0.603919	8
>tr|A0A6P7SUD6|A0A6P7SUD6_OCTVU 6-phosphogluconolactonase OS=Octopus vulgaris OX=6645 GN=LOC115216558 PE=3 SV=2	1918	1919.2	231	248	VSPVDGELIWFLDAASAK	0.603904	18
>tr|Q9BJ58|Q9BJ58_ENTDO Hemocyanin G-type (Fragment) OS=Enteroctopus dofleini OX=267067 PE=4 SV=2	1131.51	1132.29	909	918	WCPSPDAEVK	0.603875	10
>sp|O61363|HCYG_ENTDO Hemocyanin G-type, units Oda to Odg OS=Enteroctopus dofleini OX=267067 GN=ODHCY PE=1 SV=1	1131.51	1132.29	880	889	WCPSPDAEVK	0.603875	10
>Cluster-58773.148525;orf1 len=812 frame:2 start:422 end:2857 gi|676447145|ref|XP_009051312.1| hypothetical protein LOTGIDRAFT_201834 [Lottia gigantea]>gi|556109335|gb|ESO97987.1| hypothetical protein LOTGIDRAFT_201834 [Lottia gigantea]	1278.67	1279.49	470	480	IGEGWITDLFK	0.603571	11
>Cluster-58773.136028;orf1 len=262 frame:2 start:116 end:901 gi|291233326|ref|XP_002736601.1| PREDICTED: UPF0462 protein C4orf33 homolog [Saccoglossus kowalevskii]	1339.65	1340.55	250	260	NSTLWSMFTPR	0.603537	11
>tr|A0A7E6FQN6|A0A7E6FQN6_OCTVU insulin-like growth factor-binding protein complex acid labile subunit isoform X7 OS=Octopus vulgaris OX=6645 GN=LOC115225305 PE=4 SV=1	2242.22	2243.63	46	64	NLFSIPQQIPLNVEVLDFR	0.603298	19
>tr|A0A7E6FRZ6|A0A7E6FRZ6_OCTVU hemocyanin G-type, units Oda to Odg-like OS=Octopus vulgaris OX=6645 GN=LOC115225590 PE=4 SV=1	1400.82	1401.74	1672	1683	IFPEPTIIFVPK	0.603031	12
>tr|A0A7E6EGR4|A0A7E6EGR4_OCTVU short-chain collagen C4-like OS=Octopus vulgaris OX=6645 GN=LOC118760927 PE=4 SV=1	1924.84	1926.19	132	148	CYPGWTAEYSGYLMAGR	0.602636	17
>tr|A0A812EMG1|A0A812EMG1_SEPPH DNAH OS=Sepia pharaonis OX=158019 GN=SPHA_78697 PE=4 SV=1	824.394	824.917	1158	1163	SFEWQK	0.602474	6
>tr|A0A7E6EZI8|A0A7E6EZI8_OCTVU uncharacterized protein LOC115214248 OS=Octopus vulgaris OX=6645 GN=LOC115214248 PE=4 SV=1	1912.94	1914.23	5754	5772	TLQILGGGHGGSMCPDTLR	0.601887	19
>tr|A0A0L8HS70|A0A0L8HS70_OCTBM XPGN domain-containing protein OS=Octopus bimaculoides OX=37653 GN=OCBIM_22007405mg PE=3 SV=1	1628.98	1630.04	70	84	IKPIFVFDGGVPVLK	0.601713	15
>Cluster-58773.93343;orf1 len=501 frame:1 start:1 end:1503 gi|762076444|ref|XP_011445523.1| PREDICTED: xylose isomerase-like [Crassostrea gigas] >Cluster-58773.93344;orf1 len=501 frame:1 start:1 end:1503 gi|762076444|ref|XP_011445523.1| PREDICTED: xylose isomerase-like [Crassostrea gigas]	1202.66	1203.5	287	296	CQFLLEPKPK	0.601357	10
>tr|A0A812BGH7|A0A812BGH7_SEPPH Proteasome subunit alpha type OS=Sepia pharaonis OX=158019 GN=SPHA_15160 PE=3 SV=1	1668.86	1670	128	141	RPFGVSILYMGWDK	0.601146	14
>Cluster-58773.109971;orf1 len=194 frame:2 start:2 end:583 gi|762113409|ref|XP_011439462.1| PREDICTED: inter-alpha-trypsin inhibitor heavy chain H3-like [Crassostrea gigas]	2217.16	2218.71	100	119	GLPPLGMTYIHPATFIMTTR	0.600822	20
>tr|G0Y7C4|G0Y7C4_9MOLL Arginine kinase OS=Sepiella maindroni OX=153280 GN=AK PE=2 SV=1	951.46	952.124	284	291	VSQMPDFK	0.600461	8
>tr|A0A7E6FRZ6|A0A7E6FRZ6_OCTVU hemocyanin G-type, units Oda to Odg-like OS=Octopus vulgaris OX=6645 GN=LOC115225590 PE=4 SV=1	1024.59	1025.25	1317	1326	IAAFHGLPAK	0.600195	10
>Cluster-58773.47482;orf1 len=193 frame:2 start:59 end:637 gi|443711424|gb|ELU05212.1| hypothetical protein CAPTEDRAFT_211623 [Capitella teleta]	946.503	947.129	31	37	YNYVFLK	0.599785	7
>tr|A0A7E6F0K3|A0A7E6F0K3_OCTVU phosphonoacetaldehyde hydrolase isoform X2 OS=Octopus vulgaris OX=6645 GN=LOC115215216 PE=3 SV=1	2993.46	2995.47	155	181	QGFTPDVTVAGDEVINGCRPKPFMIYR	0.599547	27
>tr|A0A6P7SE31|A0A6P7SE31_OCTVU 26S proteasome non-ATPase regulatory subunit 2 OS=Octopus vulgaris OX=6645 GN=LOC115211842 PE=3 SV=1	1465.73	1466.78	251	262	FAMQVNDLQLMR	0.599354	12
>tr|A0A0L8GJH5|A0A0L8GJH5_OCTBM Pyruvate kinase OS=Octopus bimaculoides OX=37653 GN=OCBIM_22032473mg PE=3 SV=1	804.346	804.908	478	483	QAHMYR	0.598423	6
>tr|A0A812DGV9|A0A812DGV9_SEPPH AIFM3 OS=Sepia pharaonis OX=158019 GN=SPHA_53448 PE=4 SV=1	1056.5	1057.15	89	98	DDGIFAFGSK	0.598233	10
>tr|A0A6P7SE31|A0A6P7SE31_OCTVU 26S proteasome non-ATPase regulatory subunit 2 OS=Octopus vulgaris OX=6645 GN=LOC115211842 PE=3 SV=1	1590.72	1591.85	263	275	DLFYSCDDLLMQK	0.598174	13
>tr|A0A7E6FRZ6|A0A7E6FRZ6_OCTVU hemocyanin G-type, units Oda to Odg-like OS=Octopus vulgaris OX=6645 GN=LOC115225590 PE=4 SV=1	1290.63	1291.59	2573	2584	IAAYHGMPLSCK	0.597686	12
>sp|O61363|HCYG_ENTDO Hemocyanin G-type, units Oda to Odg OS=Enteroctopus dofleini OX=267067 GN=ODHCY PE=1 SV=1	2405.09	2406.79	227	248	GLDGNANCGLNMFHKPMEPFGR	0.597674	22
>tr|A0A6P7TWP3|A0A6P7TWP3_OCTVU chymotrypsin-like protease CTRL-1 OS=Octopus vulgaris OX=6645 GN=LOC115226866 PE=4 SV=2	1866.95	1868.22	120	134	WSFIEILESHLCVYK	0.597485	15
>Cluster-58773.94617;orf1 len=371 frame:1 start:124 end:1236 gi|405970764|gb|EKC35640.1| E3 ubiquitin-protein ligase TRAF7 [Crassostrea gigas]	2393.14	2394.81	61	82	ALFVPSGTMANLLSTMSHCQER	0.597481	22
>tr|A0A7E6FE51|A0A7E6FE51_OCTVU filamin-A isoform X1 OS=Octopus vulgaris OX=6645 GN=LOC115220251 PE=3 SV=1	1937.84	1939.08	175	191	CGDLPINNFTTDWNDGR	0.596974	17
>tr|A0A6P7SVY8|A0A6P7SVY8_OCTVU 3-ketoacyl-CoA thiolase, mitochondrial isoform X2 OS=Octopus vulgaris OX=6645 GN=LOC115217007 PE=3 SV=1	2634.29	2635.99	240	267	NGVVTAGNASGICDGASCLILASENAVK	0.596492	28
>tr|A0A7E6EZI8|A0A7E6EZI8_OCTVU uncharacterized protein LOC115214248 OS=Octopus vulgaris OX=6645 GN=LOC115214248 PE=4 SV=1	1177.57	1178.36	1957	1967	CAFPEVAGDLR	0.596334	11
>tr|A0A6P7SEM8|A0A6P7SEM8_OCTVU Alpha-mannosidase OS=Octopus vulgaris OX=6645 GN=LOC115211875 PE=3 SV=1	1082.51	1083.26	876	884	FNTNWAAMK	0.596169	9
>tr|A0A6P7SLJ4|A0A6P7SLJ4_OCTVU Alpha-galactosidase OS=Octopus vulgaris OX=6645 GN=LOC115213936 PE=3 SV=1	1837.78	1839.07	132	148	TCGGFPGSEFYMDIDAK	0.595983	17
>tr|A0A6P7SER3|A0A6P7SER3_OCTVU hemocyanin 1-like OS=Octopus vulgaris OX=6645 GN=LOC115212215 PE=4 SV=2	3724.81	3727.14	3431	3463	GSQIGVPYWDWTKPSSELPPLVAAETYEDPYTK	0.595736	33
>Cluster-58773.162319;orf1 len=2921 frame:3 start:24 end:8786 gi|16596797|gb|AAK28276.2| hemocyanin G-type [Enteroctopus dofleini]	3724.81	3727.14	532	564	GSQIGVPYWDWTKPSSELPPLVAAETYEDPYTK	0.595736	33
>tr|A0A6P7T976|A0A6P7T976_OCTVU H(+)-transporting two-sector ATPase OS=Octopus vulgaris OX=6645 GN=LOC115221352 PE=3 SV=1	1591.83	1592.85	441	453	HFPSINWLISYSK	0.595649	13
>tr|A0A7E6EY74|A0A7E6EY74_OCTVU twitchin OS=Octopus vulgaris OX=6645 GN=LOC115213975 PE=3 SV=1	932.568	933.148	2849	2857	ARPPPVAPK	0.595079	9
>tr|A0A6P7TD81|A0A6P7TD81_OCTVU dipeptidyl peptidase 2 isoform X1 OS=Octopus vulgaris OX=6645 GN=LOC115222860 PE=3 SV=1	1206.65	1207.42	134	143	QPYISFLTVR	0.594959	10
>tr|Q06268|Q06268_ENTDO Omega-crystallin OS=Enteroctopus dofleini OX=267067 PE=2 SV=1	841.529	842.078	524	530	ALIHLFK	0.594456	7
>tr|A0A7E6FNE1|A0A7E6FNE1_OCTVU dystrophin isoform X4 OS=Octopus vulgaris OX=6645 GN=LOC115232614 PE=4 SV=1	2371.15	2372.62	3122	3141	DFGPNSQHFLIVSVENPWER	0.594317	20
>tr|A0A0L8HU60|A0A0L8HU60_OCTBM Tetratricopeptide repeat protein 38 OS=Octopus bimaculoides OX=37653 GN=OCBIM_22006847mg PE=3 SV=1	1355.71	1356.58	92	102	QHINAIYLWSK	0.59418	11
>tr|A0A0L8IEQ2|A0A0L8IEQ2_OCTBM T-complex protein 1 subunit delta OS=Octopus bimaculoides OX=37653 GN=OCBIM_22015514mg PE=3 SV=1	1574.84	1575.88	411	426	AVVAGGGAPEIYMALR	0.594063	16
>tr|A0A6P7SVM1|A0A6P7SVM1_OCTVU protein-glucosylgalactosylhydroxylysine glucosidase isoform X2 OS=Octopus vulgaris OX=6645 GN=LOC115216968 PE=4 SV=1	1814.9	1816.1	446	460	GAEMLQNIAEFWIHR	0.593881	15
>tr|A0A6P7U7W9|A0A6P7U7W9_OCTVU putative aminopeptidase W07G4.4 isoform X1 OS=Octopus vulgaris OX=6645 GN=LOC115232621 PE=3 SV=1	1248.62	1249.37	33	44	NLDGNPGFSSLK	0.593872	12
>tr|A0A7E6EY74|A0A7E6EY74_OCTVU twitchin OS=Octopus vulgaris OX=6645 GN=LOC115213975 PE=3 SV=1	1298.64	1299.48	3370	3381	VPFSGTGPFDFK	0.593862	12
>tr|W6CNR9|W6CNR9_SEPOF Hemocyanin subunit 3 OS=Sepia officinalis OX=6610 PE=2 SV=1	1617.85	1618.89	2739	2750	LWAIWQELQQFR	0.593672	12
>tr|A0A6P7SGA6|A0A6P7SGA6_OCTVU Clathrin heavy chain OS=Octopus vulgaris OX=6645 GN=LOC115212844 PE=3 SV=1	1699.88	1700.99	782	794	FDFVHDLVLYLYR	0.593563	13
>tr|A0A6P7SI10|A0A6P7SI10_OCTVU CD109 antigen isoform X2 OS=Octopus vulgaris OX=6645 GN=LOC115213260 PE=4 SV=1	1263.68	1264.54	320	330	SYCNIPNIVIK	0.5931	11
>tr|A0A7E6FG45|A0A7E6FG45_OCTVU filamin-A isoform X3 OS=Octopus vulgaris OX=6645 GN=LOC115220426 PE=3 SV=1	1401.68	1402.56	504	515	FGDEHIPQSPFK	0.593091	12
>tr|A0A6P7SUK9|A0A6P7SUK9_OCTVU Adenosylhomocysteinase OS=Octopus vulgaris OX=6645 GN=LOC115216611 PE=3 SV=1	1093.48	1094.37	28	36	EMPGLMEMR	0.593027	9
>tr|A0A812EMG1|A0A812EMG1_SEPPH DNAH OS=Sepia pharaonis OX=158019 GN=SPHA_78697 PE=4 SV=1	1021.6	1022.24	734	743	GLPPNSVLPK	0.592989	10
>tr|A0A6P7SRT8|A0A6P7SRT8_OCTVU ATP synthase subunit beta OS=Octopus vulgaris OX=6645 GN=LOC115215584 PE=3 SV=1	1003.48	1004.09	32	40	ASSAYFTTR	0.592506	9
>Cluster-58773.162759;orf1 len=276 frame:2 start:2 end:829 gi|524875728|ref|XP_005094588.1| PREDICTED: uncharacterized protein LOC101847027 isoform X1 [Aplysia californica]>gi|524875730|ref|XP_005094589.1| PREDICTED: uncharacterized protein LOC101847027 isoform X1 [Aplysia californica]	1326.6	1327.46	61	74	QGDCPGVLSGDPAK	0.591869	14
>tr|A0A6P7TDD8|A0A6P7TDD8_OCTVU guanine nucleotide-binding protein subunit beta-like protein OS=Octopus vulgaris OX=6645 GN=LOC115222872 PE=3 SV=1	1419.66	1420.59	214	226	DGQAMLWDLGEGK	0.591287	13
>tr|A0A077B6R8|A0A077B6R8_EUPSC Hemocyanin subunit 1 OS=Euprymna scolopes OX=6613 GN=HCY1 PE=2 SV=1	2094	2095.42	1107	1125	KPMSPFSLASDINPDSMTR	0.591108	19
>tr|A0A0L8GC35|A0A0L8GC35_OCTBM N-acyl-L-amino-acid amidohydrolase OS=Octopus bimaculoides OX=37653 GN=OCBIM_22036825mg PE=3 SV=1	1447.72	1448.63	318	329	LTSIDDGNIWWK	0.590656	12
>tr|A0A0L8FKC8|A0A0L8FKC8_OCTBM 26S proteasome regulatory subunit 7 OS=Octopus bimaculoides OX=37653 GN=OCBIM_22017212mg PE=3 SV=1	1284.61	1285.54	388	399	SVCTEAGMFAIR	0.590637	12
>Cluster-141421.4;orf1 len=365 frame:2 start:2 end:1096 gi|470476037|ref|XP_004342217.1| hypothetical protein ACA1_115170 [Acanthamoeba castellanii str. Neff]>gi|440799046|gb|ELR20107.1| hypothetical protein ACA1_115170 [Acanthamoeba castellanii str. Neff]	941.52	942.112	350	357	VPAALWER	0.590595	8
>tr|A0A6P7SVM2|A0A6P7SVM2_OCTVU Spectrin beta chain OS=Octopus vulgaris OX=6645 GN=LOC115216977 PE=3 SV=1	2102.93	2104.36	640	655	LWQFYWDMADEEGWVK	0.590419	16
>tr|A0A7E6EY74|A0A7E6EY74_OCTVU twitchin OS=Octopus vulgaris OX=6645 GN=LOC115213975 PE=3 SV=1	804.356	804.902	1688	1695	DDGGCPIK	0.590307	8
>tr|A0A6P7SVJ8|A0A6P7SVJ8_OCTVU Arginase OS=Octopus vulgaris OX=6645 GN=LOC115216860 PE=3 SV=1	908.437	908.998	1	8	MSFHFSQR	0.59022	8
>tr|A0A0L8HJQ8|A0A0L8HJQ8_OCTBM Peptidase M20 domain-containing protein 2 OS=Octopus bimaculoides OX=37653 GN=OCBIM_22013224mg PE=3 SV=1	1333.68	1334.52	28	38	EIWTNPELGFK	0.589909	11
>tr|A0A6P7SYF3|A0A6P7SYF3_OCTVU retinal dehydrogenase 1 OS=Octopus vulgaris OX=6645 GN=LOC115217862 PE=3 SV=1	2343.07	2344.64	33	53	TFPTLNPCHGEPICQVQESDK	0.589906	21
>tr|A0A812DEV9|A0A812DEV9_SEPPH Rab GDP dissociation inhibitor OS=Sepia pharaonis OX=158019 GN=SPHA_54563 PE=3 SV=1	1099.58	1100.27	70	78	DWNVDLIPK	0.589661	9
>tr|A0A0L8GSS4|A0A0L8GSS4_OCTBM AAA domain-containing protein OS=Octopus bimaculoides OX=37653 GN=OCBIM_22029167mg PE=3 SV=1 >tr|A0A6P7SHR1|A0A6P7SHR1_OCTVU 26S proteasome regulatory subunit 6B OS=Octopus vulgaris OX=6645 GN=LOC115213143 PE=3 SV=1	986.531	987.15	331	338	IEFPLPDR	0.58929	8
>tr|A0A0L8HXN5|A0A0L8HXN5_OCTBM SGL domain-containing protein OS=Octopus bimaculoides OX=37653 GN=OCBIM_22003174mg PE=4 SV=1	1179.43	1180.37	302	310	MQYCEMNNF	0.589289	9
>tr|A0A7E6EZI8|A0A7E6EZI8_OCTVU uncharacterized protein LOC115214248 OS=Octopus vulgaris OX=6645 GN=LOC115214248 PE=4 SV=1	1086.6	1087.33	38	47	CSTLSIPIPR	0.588644	10
>tr|A0A6P7TGA0|A0A6P7TGA0_OCTVU Isocitrate dehydrogenase [NADP] OS=Octopus vulgaris OX=6645 GN=LOC115223822 PE=3 SV=1	1450.67	1451.59	276	286	FDDLGIWYEHR	0.587919	11
>tr|A0A6P7T033|A0A6P7T033_OCTVU T-complex protein 1 subunit gamma OS=Octopus vulgaris OX=6645 GN=LOC115218091 PE=3 SV=1	947.429	948.092	169	176	QWSELACK	0.587893	8
>tr|A0A6P7SWF0|A0A6P7SWF0_OCTVU probable methylmalonate-semialdehyde dehydrogenase [acylating], mitochondrial OS=Octopus vulgaris OX=6645 GN=LOC115217127 PE=3 SV=1	1265.67	1266.51	1	12	MFNSLNMASLLR	0.587871	12
>tr|A0A6P7ST76|A0A6P7ST76_OCTVU elongation factor 1-beta OS=Octopus vulgaris OX=6645 GN=LOC115216350 PE=3 SV=1	859.446	860.009	55	60	WFEHIK	0.58779	6
>tr|A0A6P7U678|A0A6P7U678_OCTVU collagen alpha-4(VI) chain OS=Octopus vulgaris OX=6645 GN=LOC115232146 PE=4 SV=2	2187.26	2188.64	1	20	HHDFLALISIIQLGNAAILK	0.58745	20
>tr|A0A6P7TPW3|A0A6P7TPW3_OCTVU 2-phospho-D-glycerate hydro-lyase OS=Octopus vulgaris OX=6645 GN=LOC115224300 PE=3 SV=1	2296.14	2297.6	374	395	SGETEDTFIADLVVGLCTGQIK	0.587384	22
>tr|A0A6P7TGA0|A0A6P7TGA0_OCTVU Isocitrate dehydrogenase [NADP] OS=Octopus vulgaris OX=6645 GN=LOC115223822 PE=3 SV=1	3201.51	3203.59	308	338	NYDGDVQSDIVAQGYGSLGLMTSVLVCPDGK	0.587087	31
>tr|A0A6P7TUI8|A0A6P7TUI8_OCTVU uncharacterized protein LOC115225721 OS=Octopus vulgaris OX=6645 GN=LOC115225721 PE=3 SV=1	956.47	957.043	361	369	GHGPTFGQR	0.587028	9
>Cluster-58773.187542;orf1 len=244 frame:-2 start:928 end:197 gi|524865670|ref|XP_005089662.1| PREDICTED: uncharacterized protein LOC101849508 [Aplysia californica]	1119.62	1120.34	140	149	ALNAVYPFPK	0.586979	10
>tr|Q06268|Q06268_ENTDO Omega-crystallin OS=Enteroctopus dofleini OX=267067 PE=2 SV=1	950.443	951.159	178	185	IADCEMLR	0.586891	8
>tr|A0A077B6R8|A0A077B6R8_EUPSC Hemocyanin subunit 1 OS=Euprymna scolopes OX=6613 GN=HCY1 PE=2 SV=1	1056.5	1057.18	496	504	CPRPDAQNR	0.586649	9
>tr|A0A7E6EW98|A0A7E6EW98_OCTVU 10-formyltetrahydrofolate dehydrogenase OS=Octopus vulgaris OX=6645 GN=LOC115216749 PE=3 SV=1	950.535	951.16	167	174	FLFPEGIK	0.586581	8
>tr|A0A6P7SGA6|A0A6P7SGA6_OCTVU Clathrin heavy chain OS=Octopus vulgaris OX=6645 GN=LOC115212844 PE=3 SV=1	870.472	871.03	1436	1442	SVNYFLK	0.586561	7
>tr|A0A812CD65|A0A812CD65_SEPPH Uncharacterized protein OS=Sepia pharaonis OX=158019 GN=SPHA_33819 PE=4 SV=1	1664.9	1665.94	1839	1852	NISDYLFERPILGK	0.586408	14
>Cluster-58773.136028;orf1 len=262 frame:2 start:116 end:901 gi|291233326|ref|XP_002736601.1| PREDICTED: UPF0462 protein C4orf33 homolog [Saccoglossus kowalevskii]	1105.58	1106.28	196	205	FNAFAIHGTK	0.58614	10
>tr|A0A812CYT6|A0A812CYT6_SEPPH MYH OS=Sepia pharaonis OX=158019 GN=SPHA_42230 PE=3 SV=1	848.451	848.98	2054	2061	SIASPFNI	0.58597	8
>tr|A0A812DGV9|A0A812DGV9_SEPPH AIFM3 OS=Sepia pharaonis OX=158019 GN=SPHA_53448 PE=4 SV=1	2075.16	2076.52	319	339	NVVIIGSSFIGMEVAAAVIGK	0.585867	21
>tr|A0A6P7T9I0|A0A6P7T9I0_OCTVU Glyoxalase I OS=Octopus vulgaris OX=6645 GN=LOC115221453 PE=3 SV=1	1398.61	1399.58	22	31	DFFYQQTMYR	0.585547	10
>tr|A0A7E6FKU8|A0A7E6FKU8_OCTVU 1,2-dihydroxy-3-keto-5-methylthiopentene dioxygenase OS=Octopus vulgaris OX=6645 GN=LOC115223255 PE=3 SV=1	1384.74	1385.68	123	134	DLIVLPAGMYHR	0.585531	12
>tr|A0A7E6EK24|A0A7E6EK24_OCTVU deoxynucleoside triphosphate triphosphohydrolase SAMHD1-like OS=Octopus vulgaris OX=6645 GN=LOC115231394 PE=4 SV=1	1837.87	1839.1	47	62	QLGLCYYVFPSASHNR	0.585458	16
>Cluster-58773.190283;orf1 len=447 frame:2 start:353 end:1693 gi|617418760|ref|XP_007557771.1| PREDICTED: deoxynucleoside triphosphate triphosphohydrolase SAMHD1-like [Poecilia formosa]	1837.87	1839.1	92	107	QLGLCYYVFPSASHNR	0.585458	16
>tr|A0A0L8HJQ8|A0A0L8HJQ8_OCTBM Peptidase M20 domain-containing protein 2 OS=Octopus bimaculoides OX=37653 GN=OCBIM_22013224mg PE=3 SV=1	1859.84	1861.18	263	281	VICCANGAATATGCSLNYK	0.585355	19
>tr|A0A6P7T033|A0A6P7T033_OCTVU T-complex protein 1 subunit gamma OS=Octopus vulgaris OX=6645 GN=LOC115218091 PE=3 SV=1	1579.73	1580.81	357	369	IGDEYFTYLIDCK	0.584822	13
>tr|A0A6P7T066|A0A6P7T066_OCTVU Glyceraldehyde-3-phosphate dehydrogenase OS=Octopus vulgaris OX=6645 GN=LOC115217845 PE=3 SV=1	1867.98	1869.14	291	308	SSIFDASAGIQLSPTFVK	0.584042	18
>Cluster-58773.160890;orf1 len=401 frame:2 start:1043 end:2245 gi|300518909|gb|ADK25704.1| glyceraldehyde-3-phosphate dehydrogenase [Cancer borealis] >Cluster-58773.160894;orf1 len=401 frame:3 start:45 end:1247 gi|300518909|gb|ADK25704.1| glyceraldehyde-3-phosphate dehydrogenase [Cancer borealis]	1867.98	1869.14	356	373	SSIFDASAGIQLSPTFVK	0.584042	18
>tr|A0A7E6FNE1|A0A7E6FNE1_OCTVU dystrophin isoform X4 OS=Octopus vulgaris OX=6645 GN=LOC115232614 PE=4 SV=1	2041.17	2042.44	963	981	ALEEIPSRPYLSALGALLK	0.583966	19
>tr|A0A812CG60|A0A812CG60_SEPPH ARF1_2 OS=Sepia pharaonis OX=158019 GN=SPHA_38611 PE=3 SV=1	1773.75	1775.05	45	60	CCCTHPPDHAITNAYK	0.583908	16
>tr|A0A7E6FKU8|A0A7E6FKU8_OCTVU 1,2-dihydroxy-3-keto-5-methylthiopentene dioxygenase OS=Octopus vulgaris OX=6645 GN=LOC115223255 PE=3 SV=1	2181.07	2182.58	141	160	VSCNYIIIILHFSEAMSPSG	0.583881	20
>Cluster-58773.105280;orf1 len=426 frame:1 start:307 end:1584 gi|827883539|dbj|BAR90777.1| beta arrestin [Idiosepius paradoxus] >Cluster-58773.105276;orf1 len=426 frame:1 start:307 end:1584 gi|827883539|dbj|BAR90777.1| beta arrestin [Idiosepius paradoxus] >tr|A0A6P7SCX4|A0A6P7SCX4_OCTVU beta-arrestin-1 OS=Octopus vulgaris OX=6645 GN=LOC115211741 PE=3 SV=1	1160.66	1161.4	63	72	VYAHILAAFR	0.583408	10
>tr|A0A7E6FT44|A0A7E6FT44_OCTVU 4-hydroxyphenylpyruvate dioxygenase OS=Octopus vulgaris OX=6645 GN=LOC115226087 PE=3 SV=1	1723.9	1725.02	16	30	FVSFAHLTFWVGNAK	0.583052	15
>Cluster-58773.198809;orf1 len=296 frame:2 start:149 end:1036 gi|871209239|ref|XP_012941697.1| PREDICTED: carbonic anhydrase 1-like [Aplysia californica] >Cluster-58773.198805;orf1 len=296 frame:-3 start:932 end:45 gi|871209239|ref|XP_012941697.1| PREDICTED: carbonic anhydrase 1-like [Aplysia californica] >Cluster-58773.198810;orf1 len=296 frame:2 start:251 end:1138 gi|871209239|ref|XP_012941697.…	1116.51	1117.17	48	57	DDNGPSVWAR	0.582994	10
>tr|A0A0L8H1Z7|A0A0L8H1Z7_OCTBM CN hydrolase domain-containing protein OS=Octopus bimaculoides OX=37653 GN=OCBIM_22024094mg PE=4 SV=1	1008.53	1009.22	227	235	IAVNICYGR	0.582828	9
>tr|A0A077B6R8|A0A077B6R8_EUPSC Hemocyanin subunit 1 OS=Euprymna scolopes OX=6613 GN=HCY1 PE=2 SV=1	1520.85	1521.82	668	679	LWAIWQALQVHR	0.582774	12
>tr|A0A6P7TM22|A0A6P7TM22_OCTVU Tetratricopeptide repeat protein 38 OS=Octopus vulgaris OX=6645 GN=LOC115223987 PE=3 SV=1	809.397	809.968	310	316	AVFDVCR	0.582523	7
>tr|A0A7E6EW14|A0A7E6EW14_OCTVU Tetraspanin OS=Octopus vulgaris OX=6645 GN=LOC115212017 PE=3 SV=1	1002.38	1003.11	149	157	DFNCCGSTR	0.582091	9
>tr|A0A6P7STJ4|A0A6P7STJ4_OCTVU Carboxylic ester hydrolase OS=Octopus vulgaris OX=6645 GN=LOC115216415 PE=3 SV=1	3187.7	3189.96	572	597	ILTTFTSVFFSLMVYWNFLLLQFIMI	0.581875	26
>tr|A0A6P7SER3|A0A6P7SER3_OCTVU hemocyanin 1-like OS=Octopus vulgaris OX=6645 GN=LOC115212215 PE=4 SV=2	1014.47	1015.14	471	479	CPEPDAINR	0.581859	9
>tr|A0A6P7SDC4|A0A6P7SDC4_OCTVU hemocyanin G-type, units Oda to Odg OS=Octopus vulgaris OX=6645 GN=LOC115211670 PE=4 SV=2	1014.47	1015.14	490	498	CPEPDAINR	0.581859	9
>Cluster-58773.162319;orf1 len=2921 frame:3 start:24 end:8786 gi|16596797|gb|AAK28276.2| hemocyanin G-type [Enteroctopus dofleini]	1014.47	1015.14	494	502	CPEPDAINR	0.581859	9
>tr|Q9BJ58|Q9BJ58_ENTDO Hemocyanin G-type (Fragment) OS=Enteroctopus dofleini OX=267067 PE=4 SV=2	1014.47	1015.14	495	503	CPEPDAINR	0.581859	9
>sp|O61363|HCYG_ENTDO Hemocyanin G-type, units Oda to Odg OS=Enteroctopus dofleini OX=267067 GN=ODHCY PE=1 SV=1	1014.47	1015.14	466	474	CPEPDAINR	0.581859	9
>tr|A0A7E6EZI8|A0A7E6EZI8_OCTVU uncharacterized protein LOC115214248 OS=Octopus vulgaris OX=6645 GN=LOC115214248 PE=4 SV=1	2345.17	2346.68	3162	3182	VIQDCEDVLYPELGLPLSDAR	0.581726	21
>tr|A0A6P7SDN6|A0A6P7SDN6_OCTVU gelsolin-like protein 2 OS=Octopus vulgaris OX=6645 GN=LOC115211664 PE=4 SV=1	1017.61	1018.25	220	228	ALQFLQGLK	0.581492	9
>tr|A0A6P7SGA6|A0A6P7SGA6_OCTVU Clathrin heavy chain OS=Octopus vulgaris OX=6645 GN=LOC115212844 PE=3 SV=1	2004.02	2005.29	1352	1368	AAEQAHLWAELVFLYDK	0.581102	17
>tr|F0V3W2|F0V3W2_LEPCI Hemocyanin (Fragment) OS=Lepidochitona cinerea OX=256056 PE=2 SV=1	1262.61	1263.4	152	162	QELFDQPAFGK	0.580943	11
>tr|A0A6P7TM22|A0A6P7TM22_OCTVU Tetratricopeptide repeat protein 38 OS=Octopus vulgaris OX=6645 GN=LOC115223987 PE=3 SV=1	1980.14	1981.4	128	144	IWQDILVETPLDILALK	0.580554	17
>tr|A0A7E6EZ79|A0A7E6EZ79_OCTVU L-threonine ammonia-lyase-like OS=Octopus vulgaris OX=6645 GN=LOC115214389 PE=4 SV=1	1299.58	1300.44	231	242	YTPNFCDGIGGR	0.580369	12
>tr|A0A7E6EZI8|A0A7E6EZI8_OCTVU uncharacterized protein LOC115214248 OS=Octopus vulgaris OX=6645 GN=LOC115214248 PE=4 SV=1	1046.59	1047.25	51	60	GGILPYPTTK	0.580193	10
>Cluster-58773.136028;orf1 len=262 frame:2 start:116 end:901 gi|291233326|ref|XP_002736601.1| PREDICTED: UPF0462 protein C4orf33 homolog [Saccoglossus kowalevskii]	1252.68	1253.52	147	157	GEHLLLMLNGR	0.580112	11
>tr|A0A6P7SGA6|A0A6P7SGA6_OCTVU Clathrin heavy chain OS=Octopus vulgaris OX=6645 GN=LOC115212844 PE=3 SV=1	2718.57	2720.4	1408	1430	ALIFYLDFKPMLINDLLLVLTPR	0.579924	23
>tr|I0JGT9|I0JGT9_SEPOF Actin I OS=Sepia officinalis OX=6610 GN=ACTI PE=2 SV=1 >tr|A0A0L8HIZ8|A0A0L8HIZ8_OCTBM Uncharacterized protein OS=Octopus bimaculoides OX=37653 GN=OCBIM_22013417mg PE=3 SV=1 >tr|A0A6P7U2X7|A0A6P7U2X7_OCTVU actin, adductor muscle OS=Octopus vulgaris OX=6645 GN=LOC115232513 PE=3 SV=1	1515.75	1516.71	86	96	IWHHTFYNELR	0.579856	11
>tr|A0A6P7SKQ4|A0A6P7SKQ4_OCTVU actin, cytoplasmic OS=Octopus vulgaris OX=6645 GN=LOC115214120 PE=3 SV=1	1515.75	1516.71	85	95	IWHHTFYNELR	0.579856	11
>tr|A0A812CKE2|A0A812CKE2_SEPPH ACTB_G1 OS=Sepia pharaonis OX=158019 GN=SPHA_36281 PE=3 SV=1	1515.75	1516.71	86	96	IWHHTFYNELR	0.579856	11
>tr|A0A812CBN1|A0A812CBN1_SEPPH Uncharacterized protein OS=Sepia pharaonis OX=158019 GN=SPHA_33848 PE=4 SV=1	1999.95	2001.18	538	556	GEAHPNPFFSGAIDEVNAK	0.579769	19
>tr|A0A6P7TDD8|A0A6P7TDD8_OCTVU guanine nucleotide-binding protein subunit beta-like protein OS=Octopus vulgaris OX=6645 GN=LOC115222872 PE=3 SV=1	1394.66	1395.65	90	100	LWDLNQSMMTR	0.579737	11
>tr|A0A7E6EY74|A0A7E6EY74_OCTVU twitchin OS=Octopus vulgaris OX=6645 GN=LOC115213975 PE=3 SV=1	1367.72	1368.58	2750	2762	LPYDPPSTPGVPK	0.579652	13
>tr|A0A6P7T1G4|A0A6P7T1G4_OCTVU uncharacterized protein LOC115218491 OS=Octopus vulgaris OX=6645 GN=LOC115218491 PE=4 SV=1	1702.82	1703.93	299	314	EPNNALSAEVVFPCGR	0.579613	16
>tr|A0A812DRM9|A0A812DRM9_SEPPH Hypothetical protein OS=Sepia pharaonis OX=158019 GN=SPHA_58637 PE=4 SV=1	1492.73	1493.8	12	24	QIMCSLLFNTSPR	0.579539	13
>tr|A0A7E6FIQ7|A0A7E6FIQ7_OCTVU uncharacterized protein LOC115221679 isoform X1 OS=Octopus vulgaris OX=6645 GN=LOC115221679 PE=4 SV=1	812.426	812.906	304	311	STGPPPTR	0.579537	8
>tr|A0A6P7SVM2|A0A6P7SVM2_OCTVU Spectrin beta chain OS=Octopus vulgaris OX=6645 GN=LOC115216977 PE=3 SV=1	1861.02	1862.19	499	513	DNVLSLWNYLLELLR	0.579323	15
>tr|A0A6P7TRV9|A0A6P7TRV9_OCTVU Ubiquitin-activating enzyme E1 OS=Octopus vulgaris OX=6645 GN=LOC115225288 PE=3 SV=1	1446.75	1447.69	521	531	QFLFRPWDVQK	0.579004	11
>tr|A0A6P7TPW3|A0A6P7TPW3_OCTVU 2-phospho-D-glycerate hydro-lyase OS=Octopus vulgaris OX=6645 GN=LOC115224300 PE=3 SV=1	813.519	814.022	337	344	AANALLLK	0.578971	8
>tr|A0A6P7T1G4|A0A6P7T1G4_OCTVU uncharacterized protein LOC115218491 OS=Octopus vulgaris OX=6645 GN=LOC115218491 PE=4 SV=1	1396.61	1397.56	267	277	AFYNGMNNFYR	0.578965	11
>tr|A0A6P7TEC1|A0A6P7TEC1_OCTVU spermidine synthase OS=Octopus vulgaris OX=6645 GN=LOC115222533 PE=3 SV=1	2145.05	2146.51	183	201	ALKPDGIMCNQGENIWLDK	0.578912	19
>tr|A0A077B6R8|A0A077B6R8_EUPSC Hemocyanin subunit 1 OS=Euprymna scolopes OX=6613 GN=HCY1 PE=2 SV=1	3760.89	3763.27	534	566	GSQIGVPYWDWTKPITALPHLLGDETYVDPYTK	0.578669	33
>tr|A0A812EMG1|A0A812EMG1_SEPPH DNAH OS=Sepia pharaonis OX=158019 GN=SPHA_78697 PE=4 SV=1	1215.66	1216.43	782	792	FVPEDPLTLGK	0.578217	11
>tr|A0A6P7TV68|A0A6P7TV68_OCTVU 26S proteasome non-ATPase regulatory subunit 6 OS=Octopus vulgaris OX=6645 GN=LOC115229467 PE=3 SV=1	2176.01	2177.52	47	65	EDNMAPFYETVCIAQLGFK	0.577953	19
>tr|A0A0L8IDH2|A0A0L8IDH2_OCTBM Non-specific serine/threonine protein kinase OS=Octopus bimaculoides OX=37653 GN=OCBIM_22020713mg PE=3 SV=1	1520.76	1521.85	167	180	CCGTLPYVAPEVIR	0.577893	14
>tr|A0A7E6EZI8|A0A7E6EZI8_OCTVU uncharacterized protein LOC115214248 OS=Octopus vulgaris OX=6645 GN=LOC115214248 PE=4 SV=1	2028.87	2030.27	1776	1794	CINECLSAGMSDLDSDISR	0.577718	19
>tr|A0A6P7SJ72|A0A6P7SJ72_OCTVU Glutamine--fructose-6-phosphate transaminase (isomerizing) OS=Octopus vulgaris OX=6645 GN=LOC115213781 PE=4 SV=1	2326.07	2327.83	483	502	AYTSQFIALVMFGLMMCEDR	0.577643	20
>tr|W6CNR9|W6CNR9_SEPOF Hemocyanin subunit 3 OS=Sepia officinalis OX=6610 PE=2 SV=1	1144.56	1145.26	3297	3306	LDAHDAFDLK	0.577624	10
>tr|A0A0L8G0N4|A0A0L8G0N4_OCTBM Prolyl endopeptidase OS=Octopus bimaculoides OX=37653 GN=OCBIM_22003476mg PE=3 SV=1	1385.72	1386.67	470	481	DGTQIPMFLVHK	0.577615	12
>tr|A0A0L8GUX3|A0A0L8GUX3_OCTBM Uncharacterized protein OS=Octopus bimaculoides OX=37653 GN=OCBIM_22027429mg PE=3 SV=1	1391.75	1392.72	39	50	KPVHLTAFMGYK	0.577434	12
>Cluster-58773.148525;orf1 len=812 frame:2 start:422 end:2857 gi|676447145|ref|XP_009051312.1| hypothetical protein LOTGIDRAFT_201834 [Lottia gigantea]>gi|556109335|gb|ESO97987.1| hypothetical protein LOTGIDRAFT_201834 [Lottia gigantea]	1728.85	1730.01	155	168	SRPEYMLPVNFYGR	0.577075	14
>Cluster-58773.108885;orf1 len=1084 frame:2 start:158 end:3409 gi|667467110|sp|B3EWZ9.1|HEPHL_ACRMI RecName: Full=Hephaestin-like protein; Flags: Precursor [Acropora millepora]	1278.64	1279.44	1037	1047	DTLDLWPGSFK	0.576922	11
>tr|I0JGT9|I0JGT9_SEPOF Actin I OS=Sepia officinalis OX=6610 GN=ACTI PE=2 SV=1 >tr|A0A0L8HIZ8|A0A0L8HIZ8_OCTBM Uncharacterized protein OS=Octopus bimaculoides OX=37653 GN=OCBIM_22013417mg PE=3 SV=1 >tr|A0A6P7U2X7|A0A6P7U2X7_OCTVU actin, adductor muscle OS=Octopus vulgaris OX=6645 GN=LOC115232513 PE=3 SV=1	1811.76	1813.05	1	19	MCDDDVAALVVDNGSGMCK	0.576636	19
>tr|A0A6P7SE31|A0A6P7SE31_OCTVU 26S proteasome non-ATPase regulatory subunit 2 OS=Octopus vulgaris OX=6645 GN=LOC115211842 PE=3 SV=1	1217.68	1218.45	81	90	FLRPHYGSLK	0.57657	10
>tr|A0A077B6R8|A0A077B6R8_EUPSC Hemocyanin subunit 1 OS=Euprymna scolopes OX=6613 GN=HCY1 PE=2 SV=1	2398.13	2399.84	77	98	AADGSSIVCCLHGMPTFPLWHR	0.576489	22
>tr|A0A6P7TGG8|A0A6P7TGG8_OCTVU Gamma-cystathionase OS=Octopus vulgaris OX=6645 GN=LOC115223921 PE=3 SV=1	1201.63	1202.47	306	316	GFSGMVSLYIK	0.576406	11
>tr|A0A6P7SZ60|A0A6P7SZ60_OCTVU aldehyde dehydrogenase, mitochondrial OS=Octopus vulgaris OX=6645 GN=LOC115217872 PE=3 SV=1	2237.04	2238.45	57	77	TFQTLNPSNGDVICEVAEGDK	0.576318	21
>tr|A0A7E6ENX1|A0A7E6ENX1_OCTVU spectrin alpha chain isoform X2 OS=Octopus vulgaris OX=6645 GN=LOC115227715 PE=3 SV=1	1528.64	1529.74	160	171	ECDEVMFWINDK	0.576289	12
>tr|A0A6P7SVJ8|A0A6P7SVJ8_OCTVU Arginase OS=Octopus vulgaris OX=6645 GN=LOC115216860 PE=3 SV=1	1272.68	1273.51	41	51	SCVNNLLRPTR	0.576193	11
>tr|A0A6P7TGU1|A0A6P7TGU1_OCTVU actin-interacting protein 1 isoform X1 OS=Octopus vulgaris OX=6645 GN=LOC115223147 PE=4 SV=1	2567.2	2568.84	333	355	LVFSGCSSGHINYWDLVNGLDDR	0.576011	23
>tr|A0A6P7SLJ4|A0A6P7SLJ4_OCTVU Alpha-galactosidase OS=Octopus vulgaris OX=6645 GN=LOC115213936 PE=3 SV=1	3785.02	3787.55	6	40	IAFGLASILLLCQSVLSLDNGLALTPPMGWLSWER	0.575973	35
>tr|A0A6P7SCY0|A0A6P7SCY0_OCTVU uncharacterized protein LOC115211594 OS=Octopus vulgaris OX=6645 GN=LOC115211594 PE=4 SV=1	1560.7	1561.72	71	84	VGEPFESDDLHGMK	0.575624	14
>tr|A0A7E6ENX1|A0A7E6ENX1_OCTVU spectrin alpha chain isoform X2 OS=Octopus vulgaris OX=6645 GN=LOC115227715 PE=3 SV=1	1253.63	1254.4	685	694	EASLQQQFFR	0.575239	10
>tr|A0A0L8HB35|A0A0L8HB35_OCTBM CCT-beta OS=Octopus bimaculoides OX=37653 GN=OCBIM_22018710mg PE=3 SV=1	1307.72	1308.54	123	133	IHPQTIISGWR	0.575044	11
>tr|A0A6P7SZG0|A0A6P7SZG0_OCTVU cAMP-regulated phosphoprotein 19 OS=Octopus vulgaris OX=6645 GN=LOC115217970 PE=3 SV=1	1642.68	1643.78	88	101	GFQYFDSGDYNMAK	0.575025	14
>tr|A0A7E6EY74|A0A7E6EY74_OCTVU twitchin OS=Octopus vulgaris OX=6645 GN=LOC115213975 PE=3 SV=1	1360.71	1361.55	1788	1800	DGGAPIEGYLIQK	0.574983	13
>Cluster-58773.161692;orf1 len=264 frame:-3 start:814 end:23 gi|512130272|gb|AGN96214.1| 14-3-3 protein epsilon [Octopus bimaculoides] >Cluster-58773.162168;orf1 len=264 frame:2 start:1271 end:2062 gi|512130272|gb|AGN96214.1| 14-3-3 protein epsilon [Octopus bimaculoides]	1882.96	1884.15	109	125	QLLPIASSGESNVFYFK	0.574979	17
>tr|A0A7E6EK24|A0A7E6EK24_OCTVU deoxynucleoside triphosphate triphosphohydrolase SAMHD1-like OS=Octopus vulgaris OX=6645 GN=LOC115231394 PE=4 SV=1	824.43	824.961	359	364	IPFYER	0.574844	6
>tr|A0A6P7U2G4|A0A6P7U2G4_OCTVU uncharacterized protein LOC115232424 OS=Octopus vulgaris OX=6645 GN=LOC115232424 PE=4 SV=1	1424.74	1425.63	177	189	IDSGTSVFLNPFK	0.574797	13
>tr|A0A7E6EZI8|A0A7E6EZI8_OCTVU uncharacterized protein LOC115214248 OS=Octopus vulgaris OX=6645 GN=LOC115214248 PE=4 SV=1	988.488	989.145	4886	4895	GGDMTPAALR	0.57472	10
>tr|A0A7E6EY74|A0A7E6EY74_OCTVU twitchin OS=Octopus vulgaris OX=6645 GN=LOC115213975 PE=3 SV=1	1134.57	1135.28	3874	3882	EPPHQNWVK	0.574557	9
>Cluster-58773.108885;orf1 len=1084 frame:2 start:158 end:3409 gi|667467110|sp|B3EWZ9.1|HEPHL_ACRMI RecName: Full=Hephaestin-like protein; Flags: Precursor [Acropora millepora]	1478.79	1479.79	567	580	DTYSGLVGPLLICK	0.574434	14
>tr|A0A6P7SIX4|A0A6P7SIX4_OCTVU Inorganic diphosphatase OS=Octopus vulgaris OX=6645 GN=LOC115213471 PE=3 SV=2	1196.57	1197.36	131	141	SSPACVISNYR	0.574403	11
>tr|A0A7E6EY74|A0A7E6EY74_OCTVU twitchin OS=Octopus vulgaris OX=6645 GN=LOC115213975 PE=3 SV=1	904.434	905.07	1240	1247	MDIFHGGK	0.574342	8
>tr|A0A7E6EHE9|A0A7E6EHE9_OCTVU prosaposin isoform X1 OS=Octopus vulgaris OX=6645 GN=LOC115209891 PE=4 SV=1	1935.79	1937.19	377	393	FSTANPFQEATECEMCK	0.574188	17
>tr|A0A6P7T033|A0A6P7T033_OCTVU T-complex protein 1 subunit gamma OS=Octopus vulgaris OX=6645 GN=LOC115218091 PE=3 SV=1	1386.74	1387.65	33	45	SIADIIQTCLGPR	0.574063	13
>tr|A0A6P7SYD8|A0A6P7SYD8_OCTVU neutral protease isoform X1 OS=Octopus vulgaris OX=6645 GN=LOC115217300 PE=3 SV=1	1260.61	1261.49	607	616	FFFMLSPESR	0.573798	10
>tr|A0A6P7TDN6|A0A6P7TDN6_OCTVU 4a-hydroxytetrahydrobiopterin dehydratase OS=Octopus vulgaris OX=6645 GN=LOC115221645 PE=3 SV=1	1001.53	1002.23	58	66	DDVLAPLMK	0.573536	9
>tr|A0A812CTD3|A0A812CTD3_SEPPH Hypothetical protein OS=Sepia pharaonis OX=158019 GN=SPHA_40360 PE=4 SV=1	943.511	944.088	22	30	WGIGQGGIR	0.573523	9
>tr|A0A0L8HS70|A0A0L8HS70_OCTBM XPGN domain-containing protein OS=Octopus bimaculoides OX=37653 GN=OCBIM_22007405mg PE=3 SV=1	1005.55	1006.2	356	363	NILFNWAK	0.572976	8
>tr|A0A6P7T8U5|A0A6P7T8U5_OCTVU uncharacterized protein LOC115221216 OS=Octopus vulgaris OX=6645 GN=LOC115221216 PE=4 SV=1	1043.49	1044.22	196	203	MFDNLFEK	0.572667	8
>Cluster-58773.162111;orf1 len=288 frame:1 start:1 end:864 gi|675369805|gb|KFM62707.1| Laminin subunit alpha-2, partial [Stegodyphus mimosarum]	1043.49	1044.22	159	166	MFDNLFEK	0.572667	8
>tr|A0A6P7STJ4|A0A6P7STJ4_OCTVU Carboxylic ester hydrolase OS=Octopus vulgaris OX=6645 GN=LOC115216415 PE=3 SV=1	2230.11	2231.59	534	552	ETSLYSICSFWSDLLPQLK	0.572514	19
>tr|A0A6P7SQT5|A0A6P7SQT5_OCTVU cathepsin L1-like OS=Octopus vulgaris OX=6645 GN=LOC115215560 PE=3 SV=1	857.466	858.057	94	100	MNNLIPR	0.572245	7
>Cluster-58773.132040;orf1 len=167 frame:-2 start:502 end:2 gi|492370606|gb|AGL33705.1| cathepsin L2 [Sinonovacula constricta]	857.466	858.057	76	82	MNNLIPR	0.572245	7
>tr|A0A0L8G8E4|A0A0L8G8E4_OCTBM TGc domain-containing protein OS=Octopus bimaculoides OX=37653 GN=OCBIM_22038334mg PE=3 SV=1	1045.58	1046.22	106	113	LFEDLRPR	0.572133	8
>Cluster-58773.179191;orf1 len=448 frame:1 start:25 end:1368 gi|260818781|ref|XP_002604561.1| hypothetical protein BRAFLDRAFT_280591 [Branchiostoma floridae]>gi|229289888|gb|EEN60572.1| hypothetical protein BRAFLDRAFT_280591 [Branchiostoma floridae]	2071.99	2073.52	188	206	MVLYIEACESGSMFPGLPK	0.572092	19
>tr|A0A7E6F1S6|A0A7E6F1S6_OCTVU microtubule-associated protein futsch isoform X4 OS=Octopus vulgaris OX=6645 GN=LOC115215514 PE=4 SV=1	3517.8	3520.2	416	447	QSIQVNGSQCPLPNMLSICALLIWRPADPLEK	0.572062	32
>tr|A0A7E6EY74|A0A7E6EY74_OCTVU twitchin OS=Octopus vulgaris OX=6645 GN=LOC115213975 PE=3 SV=1	2165.06	2166.52	4053	4070	YEMVLIFEFLSGGELFDR	0.572039	18
>tr|A0A6P7SRB2|A0A6P7SRB2_OCTVU acidic mammalian chitinase isoform X1 OS=Octopus vulgaris OX=6645 GN=LOC115215700 PE=3 SV=1	2878.46	2880.38	154	180	LVVLLSVGGWNMGSALFTQMASTPENR	0.572031	27
>tr|A0A6P7SH66|A0A6P7SH66_OCTVU alpha-actinin, sarcomeric isoform X3 OS=Octopus vulgaris OX=6645 GN=LOC115212896 PE=4 SV=1	1025.45	1026.17	630	637	MSFNHFDK	0.571884	8
>tr|Q27Q56|Q27Q56_SEPOF Hemocyanin subunit 2 (Fragment) OS=Sepia officinalis OX=6610 PE=2 SV=1	1508.72	1509.69	3231	3244	AIGQSADVNFDICR	0.57138	14
>tr|A0A7E6EZI8|A0A7E6EZI8_OCTVU uncharacterized protein LOC115214248 OS=Octopus vulgaris OX=6645 GN=LOC115214248 PE=4 SV=1	1553.73	1554.73	4862	4875	SGYPELSSDLQMAR	0.571289	14
>tr|A0A6P7T7W6|A0A6P7T7W6_OCTVU Aspartyl aminopeptidase OS=Octopus vulgaris OX=6645 GN=LOC115220844 PE=3 SV=1	1270.58	1271.44	450	459	NYPEIFDNMK	0.570787	10
>Cluster-58773.217011;orf1 len=333 frame:3 start:348 end:1346 gi|762104009|ref|XP_011434531.1| PREDICTED: prostaglandin reductase 1-like [Crassostrea gigas]>gi|405958743|gb|EKC24838.1| Prostaglandin reductase 1 [Crassostrea gigas]	1352.72	1353.57	315	327	AFLGLFEGSNIGK	0.570422	13
>tr|A0A812CD65|A0A812CD65_SEPPH Uncharacterized protein OS=Sepia pharaonis OX=158019 GN=SPHA_33819 PE=4 SV=1	2482.24	2483.87	1728	1751	SSDGFEAIASFHALPPLCPNPLAK	0.570195	24
>tr|A0A6P7UBL9|A0A6P7UBL9_OCTVU fatty-acid amide hydrolase 2 isoform X2 OS=Octopus vulgaris OX=6645 GN=LOC115232529 PE=3 SV=1	3527.04	3529.32	17	48	WTLLPIFNIIFNVLNSAPPVSVPPVTNPLLLK	0.570082	32
>tr|A0A7E6FNE1|A0A7E6FNE1_OCTVU dystrophin isoform X4 OS=Octopus vulgaris OX=6645 GN=LOC115232614 PE=4 SV=1	1198.66	1199.4	163	173	DGLAFNALIHK	0.569974	11
>tr|A0A7E6EZ79|A0A7E6EZ79_OCTVU L-threonine ammonia-lyase-like OS=Octopus vulgaris OX=6645 GN=LOC115214389 PE=4 SV=1	1120.58	1121.29	130	138	EWFEIIAGR	0.569947	9
>tr|A0A6P7SVM1|A0A6P7SVM1_OCTVU protein-glucosylgalactosylhydroxylysine glucosidase isoform X2 OS=Octopus vulgaris OX=6645 GN=LOC115216968 PE=4 SV=1	2122.97	2124.35	733	752	SALFVNDSFNPGYSSSCSLK	0.569924	20
>tr|A0A6P7SAW7|A0A6P7SAW7_OCTVU transketolase OS=Octopus vulgaris OX=6645 GN=LOC115210747 PE=4 SV=1	934.394	935.181	620	627	AVHQMMSM	0.569745	8
>tr|A0A0L8H9P1|A0A0L8H9P1_OCTBM Uncharacterized protein OS=Octopus bimaculoides OX=37653 GN=OCBIM_22019540mg PE=3 SV=1	2023.94	2025.31	32	48	YNHFLPYTAAFFCSQSK	0.569645	17
>tr|A0A6P7SH66|A0A6P7SH66_OCTVU alpha-actinin, sarcomeric isoform X3 OS=Octopus vulgaris OX=6645 GN=LOC115212896 PE=4 SV=1	1978.94	1980.28	354	370	CQQICDNWDILGTLTQK	0.569607	17
>tr|A0A7E6EW14|A0A7E6EW14_OCTVU Tetraspanin OS=Octopus vulgaris OX=6645 GN=LOC115212017 PE=3 SV=1	1014.47	1015.25	1	11	MGLGGCYTCIK	0.569377	11
>tr|A0A812DRM9|A0A812DRM9_SEPPH Hypothetical protein OS=Sepia pharaonis OX=158019 GN=SPHA_58637 PE=4 SV=1	1137.57	1138.34	1	11	MCSLLFNTSPR	0.568326	11
>tr|A0A7E6ENX1|A0A7E6ENX1_OCTVU spectrin alpha chain isoform X2 OS=Octopus vulgaris OX=6645 GN=LOC115227715 PE=3 SV=1	1348.8	1349.67	130	140	LHELWPLLISK	0.568233	11
>tr|A0A6P7SEM8|A0A6P7SEM8_OCTVU Alpha-mannosidase OS=Octopus vulgaris OX=6645 GN=LOC115211875 PE=3 SV=1	914.509	915.087	343	350	ANISWPVK	0.568026	8
>tr|A0A812CYT6|A0A812CYT6_SEPPH MYH OS=Sepia pharaonis OX=158019 GN=SPHA_42230 PE=3 SV=1	1901.95	1903.16	258	274	SFHIFYQFLSGASAAQK	0.567677	17
>tr|A0A6P7TUI8|A0A6P7TUI8_OCTVU uncharacterized protein LOC115225721 OS=Octopus vulgaris OX=6645 GN=LOC115225721 PE=3 SV=1	1055.56	1056.22	112	120	LDFHLGTPR	0.567635	9
>tr|A0A6P7TUI8|A0A6P7TUI8_OCTVU uncharacterized protein LOC115225721 OS=Octopus vulgaris OX=6645 GN=LOC115225721 PE=3 SV=1	1082.47	1083.17	53	62	NFCDGGNSLR	0.567465	10
>tr|A0A6P7T245|A0A6P7T245_OCTVU trans-1,2-dihydrobenzene-1,2-diol dehydrogenase isoform X1 OS=Octopus vulgaris OX=6645 GN=LOC115218668 PE=4 SV=1	1479.76	1480.72	245	256	IYIHSPFWSTTK	0.567371	12
>tr|A0A6P7T7L0|A0A6P7T7L0_OCTVU heat shock cognate 71 kDa protein OS=Octopus vulgaris OX=6645 GN=LOC115220772 PE=3 SV=1	1223.67	1224.45	302	311	FEELNALLFK	0.567212	10
>tr|A0A6P7T0G1|A0A6P7T0G1_OCTVU Phosphoglycerate kinase OS=Octopus vulgaris OX=6645 GN=LOC115218470 PE=3 SV=1	1811.01	1812.13	198	214	ALERPEEPFLAILGGAK	0.566911	17
>tr|A0A6P7SJV4|A0A6P7SJV4_OCTVU S-(hydroxymethyl)glutathione dehydrogenase OS=Octopus vulgaris OX=6645 GN=LOC115213890 PE=3 SV=1	1217.6	1218.43	358	367	INEAFDLMHK	0.566845	10
>tr|A0A6P7SE31|A0A6P7SE31_OCTVU 26S proteasome non-ATPase regulatory subunit 2 OS=Octopus vulgaris OX=6645 GN=LOC115211842 PE=3 SV=1	2896.35	2898.16	710	737	FSHDSDSEVSYNAILAMGIVGAGTNNAR	0.566803	28
>tr|A0A6P7T7I9|A0A6P7T7I9_OCTVU 60S ribosomal protein L17 OS=Octopus vulgaris OX=6645 GN=LOC115220375 PE=3 SV=1	874.576	875.149	90	96	FLLQLLK	0.566599	7
>Cluster-58773.197059;orf1 len=509 frame:1 start:352 end:1878 gi|260816652|ref|XP_002603202.1| hypothetical protein BRAFLDRAFT_281736 [Branchiostoma floridae]>gi|229288519|gb|EEN59213.1| hypothetical protein BRAFLDRAFT_281736 [Branchiostoma floridae]	2243	2244.59	146	164	NSQHVFEMETLNAFMGMTR	0.566392	19
>tr|A0A6P7TMY2|A0A6P7TMY2_OCTVU Fumarylacetoacetase OS=Octopus vulgaris OX=6645 GN=LOC115226547 PE=3 SV=2	2243	2244.59	79	97	NSQHVFEMETLNAFMGMTR	0.566392	19
>tr|A0A6P7SP60|A0A6P7SP60_OCTVU peroxiredoxin-2 OS=Octopus vulgaris OX=6645 GN=LOC115215062 PE=3 SV=1	3004.48	3006.51	33	57	YLVLFFYPLDFTFVCPTEITAFSDR	0.566352	25
>tr|A0A0L8FMS3|A0A0L8FMS3_OCTBM VWFC domain-containing protein OS=Octopus bimaculoides OX=37653 GN=OCBIM_22013879mg PE=4 SV=1	2489.12	2490.75	902	923	DNCDLIQGICTSDGIHTWVNER	0.56528	22
>tr|Q24925|Q24925_EUPSC Peroxidase-like protein (Fragment) OS=Euprymna scolopes OX=6613 PE=2 SV=1	1305.66	1306.47	694	704	DIGLPTYNAWR	0.565228	11
>tr|A0A6P7TKE4|A0A6P7TKE4_OCTVU probable aminopeptidase NPEPL1 isoform X1 OS=Octopus vulgaris OX=6645 GN=LOC115223934 PE=3 SV=1	997.51	998.133	252	261	GFGGVYNVGK	0.565039	10
>tr|A0A6P7TEG5|A0A6P7TEG5_OCTVU Alpha-L-fucosidase OS=Octopus vulgaris OX=6645 GN=LOC115223232 PE=3 SV=1	2094.89	2096.32	259	276	WGIGISCHHGDFYTCQDR	0.564588	18
>Cluster-58773.174510;orf1 len=264 frame:2 start:62 end:853 gi|260829110|ref|XP_002609505.1| hypothetical protein BRAFLDRAFT_127655 [Branchiostoma floridae]>gi|229294862|gb|EEN65515.1| hypothetical protein BRAFLDRAFT_127655 [Branchiostoma floridae]	1030.44	1031.14	254	264	SFGCSHAGAPP	0.564419	11
>Cluster-58773.159728;orf1 len=257 frame:1 start:901 end:1671 gi|291224559|ref|XP_002732271.1| PREDICTED: methylmalonic aciduria and homocystinuria type C protein homolog [Saccoglossus kowalevskii]	1161.56	1162.3	1	9	LFTSYDPYR	0.563186	9
>tr|A0A7E6FR50|A0A7E6FR50_OCTVU NADH-cytochrome b5 reductase OS=Octopus vulgaris OX=6645 GN=LOC115224390 PE=3 SV=1	2057.96	2059.32	226	243	AEPNWSFSTGFVNETMIK	0.562977	18
>tr|Q06268|Q06268_ENTDO Omega-crystallin OS=Enteroctopus dofleini OX=267067 PE=2 SV=1	1375.72	1376.56	230	241	GQALEEELAFLR	0.562955	12
>tr|A0A7E6EY74|A0A7E6EY74_OCTVU twitchin OS=Octopus vulgaris OX=6645 GN=LOC115213975 PE=3 SV=1	1118.6	1119.27	2166	2175	VNLDNLFGAR	0.562938	10
>tr|A0A6P7SJV4|A0A6P7SJV4_OCTVU S-(hydroxymethyl)glutathione dehydrogenase OS=Octopus vulgaris OX=6645 GN=LOC115213890 PE=3 SV=1	1093.52	1094.35	11	20	CMAAIAWEAK	0.562306	10
>tr|I0JGT9|I0JGT9_SEPOF Actin I OS=Sepia officinalis OX=6610 GN=ACTI PE=2 SV=1 >tr|A0A0L8HIZ8|A0A0L8HIZ8_OCTBM Uncharacterized protein OS=Octopus bimaculoides OX=37653 GN=OCBIM_22013417mg PE=3 SV=1 >tr|A0A6P7U2X7|A0A6P7U2X7_OCTVU actin, adductor muscle OS=Octopus vulgaris OX=6645 GN=LOC115232513 PE=3 SV=1	976.448	977.027	20	29	AGFAGDDAPR	0.561859	10
>tr|A0A6P7SKQ4|A0A6P7SKQ4_OCTVU actin, cytoplasmic OS=Octopus vulgaris OX=6645 GN=LOC115214120 PE=3 SV=1	976.448	977.027	19	28	AGFAGDDAPR	0.561859	10
>tr|A0A812CKE2|A0A812CKE2_SEPPH ACTB_G1 OS=Sepia pharaonis OX=158019 GN=SPHA_36281 PE=3 SV=1	976.448	977.027	20	29	AGFAGDDAPR	0.561859	10
>tr|A0A0L8GLX8|A0A0L8GLX8_OCTBM S-formylglutathione hydrolase OS=Octopus bimaculoides OX=37653 GN=OCBIM_22031609mg PE=3 SV=1	826.384	826.892	115	120	WSTNYR	0.561746	6
>Cluster-58773.136028;orf1 len=262 frame:2 start:116 end:901 gi|291233326|ref|XP_002736601.1| PREDICTED: UPF0462 protein C4orf33 homolog [Saccoglossus kowalevskii]	1801.96	1803.08	10	25	TSGHLQTPKPDLWPPK	0.561461	16
>tr|A0A6P7T066|A0A6P7T066_OCTVU Glyceraldehyde-3-phosphate dehydrogenase OS=Octopus vulgaris OX=6645 GN=LOC115217845 PE=3 SV=1	1269.64	1270.4	1	13	MGQHNIGINGFGR	0.561406	13
>Cluster-58773.160890;orf1 len=401 frame:2 start:1043 end:2245 gi|300518909|gb|ADK25704.1| glyceraldehyde-3-phosphate dehydrogenase [Cancer borealis] >Cluster-58773.160894;orf1 len=401 frame:3 start:45 end:1247 gi|300518909|gb|ADK25704.1| glyceraldehyde-3-phosphate dehydrogenase [Cancer borealis]	1416.68	1417.6	66	78	MGQHNIGINGFGR	0.561406	13
>tr|A0A6P7SUD6|A0A6P7SUD6_OCTVU 6-phosphogluconolactonase OS=Octopus vulgaris OX=6645 GN=LOC115216558 PE=3 SV=2	1289.62	1290.49	102	112	DMSADHIYPIK	0.561218	11
>Cluster-58773.173059;orf1 len=230 frame:3 start:1440 end:2129 gi|406055040|gb|AFS33112.1| calreticulin [Hyriopsis cumingii]	910.452	911.18	41	47	WMTLMTK	0.561113	7
>tr|A0A812CD65|A0A812CD65_SEPPH Uncharacterized protein OS=Sepia pharaonis OX=158019 GN=SPHA_33819 PE=4 SV=1	2068.07	2069.39	2197	2214	HGANVAIPYWDWTLPISK	0.560964	18
>tr|A0A077B6R8|A0A077B6R8_EUPSC Hemocyanin subunit 1 OS=Euprymna scolopes OX=6613 GN=HCY1 PE=2 SV=1	1626.76	1627.87	729	742	YAYDTLFFGGMSVR	0.560851	14
>tr|A0A0L8G0I6|A0A0L8G0I6_OCTBM 14_3_3 domain-containing protein OS=Octopus bimaculoides OX=37653 GN=OCBIM_22003454mg PE=3 SV=1	2526.98	2528.51	229	252	DNLTLWTSDTQCGDEEGGEGGDNN	0.560814	24
>Cluster-58773.140088;orf1 len=263 frame:2 start:32 end:820 gi|357608316|gb|EHJ65928.1| Ecdysteroid-regulated 16 kDa protein [Danaus plexippus]	1700.81	1701.95	14	28	FCVSFSFPNTPTTPR	0.560555	15
>tr|A0A7E6EY74|A0A7E6EY74_OCTVU twitchin OS=Octopus vulgaris OX=6645 GN=LOC115213975 PE=3 SV=1	1228.49	1229.32	2299	2308	CEEGSNFWEK	0.560399	10
>tr|A0A6P7T8U5|A0A6P7T8U5_OCTVU uncharacterized protein LOC115221216 OS=Octopus vulgaris OX=6645 GN=LOC115221216 PE=4 SV=1	1452.68	1453.67	14	26	SFICSALGSNYYK	0.560384	13
>tr|A0A812EMG1|A0A812EMG1_SEPPH DNAH OS=Sepia pharaonis OX=158019 GN=SPHA_78697 PE=4 SV=1	1538.87	1539.89	501	514	CLNAINELLPVLAR	0.560274	14
>tr|A0A7E6EY74|A0A7E6EY74_OCTVU twitchin OS=Octopus vulgaris OX=6645 GN=LOC115213975 PE=3 SV=1	961.372	962.032	3119	3125	DCEYEFR	0.560001	7
>tr|A0A6P7TUI8|A0A6P7TUI8_OCTVU uncharacterized protein LOC115225721 OS=Octopus vulgaris OX=6645 GN=LOC115225721 PE=3 SV=1	1716.81	1717.9	185	201	SKPAPDDSDIPSLCSGK	0.559912	17
>tr|A0A6P7TYT0|A0A6P7TYT0_OCTVU Histidine--tRNA ligase OS=Octopus vulgaris OX=6645 GN=LOC115230998 PE=3 SV=2	1432.75	1433.72	195	208	LLDGIFAACGVPEK	0.559756	14
>Cluster-58773.174459;orf1 len=349 frame:-1 start:1047 end:1 gi|676459799|ref|XP_009055418.1| hypothetical protein LOTGIDRAFT_153262 [Lottia gigantea]>gi|556105140|gb|ESO93792.1| hypothetical protein LOTGIDRAFT_153262 [Lottia gigantea]	1432.75	1433.72	220	233	LLDGIFAACGVPEK	0.559756	14
>tr|A0A7E6FD92|A0A7E6FD92_OCTVU insulin-degrading enzyme OS=Octopus vulgaris OX=6645 GN=LOC115219912 PE=3 SV=1	1959	1960.25	126	142	FAQFFISPLFTPSATER	0.559675	17
>tr|A0A6P7TKE4|A0A6P7TKE4_OCTVU probable aminopeptidase NPEPL1 isoform X1 OS=Octopus vulgaris OX=6645 GN=LOC115223934 PE=3 SV=1	1154.57	1155.37	279	288	ATYNICWVGK	0.559532	10
>tr|A0A6P7T046|A0A6P7T046_OCTVU glyoxylate reductase/hydroxypyruvate reductase OS=Octopus vulgaris OX=6645 GN=LOC115218137 PE=3 SV=1	2680.35	2682.08	48	73	GYAGLLCLLTDQVDAEVFEAAGPSLK	0.559522	26
>tr|A0A7E6FE51|A0A7E6FE51_OCTVU filamin-A isoform X1 OS=Octopus vulgaris OX=6645 GN=LOC115220251 PE=3 SV=1	2213.09	2214.41	2147	2167	VVSPSGVEDDALVNEINEAQK	0.559517	21
>tr|A0A7E6EW98|A0A7E6EW98_OCTVU 10-formyltetrahydrofolate dehydrogenase OS=Octopus vulgaris OX=6645 GN=LOC115216749 PE=3 SV=1	1839.91	1841.05	211	225	INWDQPAEAIHNYIR	0.559416	15
>Cluster-58773.130155;orf1 len=534 frame:1 start:1 end:1602 gi|871256270|ref|XP_012942267.1| PREDICTED: mucin-3A-like [Aplysia californica]	1375.62	1376.43	428	440	GSEHGSDSFPLSR	0.559302	13
>Cluster-58773.74875;orf1 len=741 frame:2 start:1832 end:4054 gi|159006|gb|AAA16244.1| peroxidase-like protein, partial [Euprymna scolopes]	1884.83	1886.13	696	711	SMAEWSEWSTCEIGIR	0.559242	16
>Cluster-58773.136028;orf1 len=262 frame:2 start:116 end:901 gi|291233326|ref|XP_002736601.1| PREDICTED: UPF0462 protein C4orf33 homolog [Saccoglossus kowalevskii]	810.451	810.977	229	234	LQFFQK	0.559241	6
>tr|A0A812E3Y7|A0A812E3Y7_SEPPH RAB11A OS=Sepia pharaonis OX=158019 GN=SPHA_67892 PE=4 SV=1	1207.52	1208.27	4	12	DDEYDYLFK	0.559203	9
>tr|W6CNR9|W6CNR9_SEPOF Hemocyanin subunit 3 OS=Sepia officinalis OX=6610 PE=2 SV=1	1203.69	1204.47	1993	2003	VFVGFSLHGIK	0.559186	11
>tr|Q9BJ58|Q9BJ58_ENTDO Hemocyanin G-type (Fragment) OS=Enteroctopus dofleini OX=267067 PE=4 SV=2	1256.71	1257.53	1079	1088	IWAIWQALQK	0.559171	10
>sp|O61363|HCYG_ENTDO Hemocyanin G-type, units Oda to Odg OS=Enteroctopus dofleini OX=267067 GN=ODHCY PE=1 SV=1	1256.71	1257.53	1050	1059	IWAIWQALQK	0.559171	10
>tr|Q27Q56|Q27Q56_SEPOF Hemocyanin subunit 2 (Fragment) OS=Sepia officinalis OX=6610 PE=2 SV=1	1256.71	1257.53	3136	3145	IWAIWQALQK	0.559171	10
>tr|A0A077B6R8|A0A077B6R8_EUPSC Hemocyanin subunit 1 OS=Euprymna scolopes OX=6613 GN=HCY1 PE=2 SV=1	1256.71	1257.53	3152	3161	IWAIWQALQK	0.559171	10
>tr|A0A812CD65|A0A812CD65_SEPPH Uncharacterized protein OS=Sepia pharaonis OX=158019 GN=SPHA_33819 PE=4 SV=1	1256.71	1257.53	2738	2747	IWAIWQALQK	0.559171	10
>tr|A0A7E6FRZ6|A0A7E6FRZ6_OCTVU hemocyanin G-type, units Oda to Odg-like OS=Octopus vulgaris OX=6645 GN=LOC115225590 PE=4 SV=1	1256.71	1257.53	1079	1088	IWAIWQALQK	0.559171	10
>tr|A0A6P7S7L1|A0A6P7S7L1_OCTVU Inositol-1-monophosphatase OS=Octopus vulgaris OX=6645 GN=LOC115209728 PE=3 SV=1	948.399	949.039	142	150	GHGAFCNDK	0.559086	9
>tr|A0A6P7SGA6|A0A6P7SGA6_OCTVU Clathrin heavy chain OS=Octopus vulgaris OX=6645 GN=LOC115212844 PE=3 SV=1	1570.94	1571.96	1446	1458	IPLVKPYLWSVQK	0.55902	13
>tr|A0A812CYT6|A0A812CYT6_SEPPH MYH OS=Sepia pharaonis OX=158019 GN=SPHA_42230 PE=3 SV=1	952.525	953.136	689	695	ILFQEFR	0.558877	7
>tr|A0A7E6FNE1|A0A7E6FNE1_OCTVU dystrophin isoform X4 OS=Octopus vulgaris OX=6645 GN=LOC115232614 PE=4 SV=1	805.403	805.98	2168	2173	LQCQWK	0.558819	6
>tr|A0A6P7TM22|A0A6P7TM22_OCTVU Tetratricopeptide repeat protein 38 OS=Octopus vulgaris OX=6645 GN=LOC115223987 PE=3 SV=1	857.404	857.944	231	237	GIDYFDK	0.558801	7
>Cluster-58773.109972;orf1 len=856 frame:2 start:89 end:2656 gi|762142591|ref|XP_011454520.1| PREDICTED: inter-alpha-trypsin inhibitor heavy chain H3-like [Crassostrea gigas]	1649.81	1650.97	291	305	HIIFMLDVSGSMSGR	0.55873	15
>tr|A0A7E6F1S6|A0A7E6F1S6_OCTVU microtubule-associated protein futsch isoform X4 OS=Octopus vulgaris OX=6645 GN=LOC115215514 PE=4 SV=1	3610.8	3613.16	236	269	FSKPTLYVFPGCQGDSALFGISGFNLLVNGGYNK	0.558635	34
>tr|Q9BJ58|Q9BJ58_ENTDO Hemocyanin G-type (Fragment) OS=Enteroctopus dofleini OX=267067 PE=4 SV=2	857.404	857.944	1807	1813	YSDPFTK	0.558515	7
>sp|O61363|HCYG_ENTDO Hemocyanin G-type, units Oda to Odg OS=Enteroctopus dofleini OX=267067 GN=ODHCY PE=1 SV=1	857.404	857.944	1778	1784	YSDPFTK	0.558515	7
>tr|A0A812CP82|A0A812CP82_SEPPH Aldehyde dehydrogenase (NAD(+)) OS=Sepia pharaonis OX=158019 GN=SPHA_37438 PE=3 SV=1	806.441	806.943	484	490	DLGNIFK	0.558321	7
>tr|A0A0L8IEQ2|A0A0L8IEQ2_OCTBM T-complex protein 1 subunit delta OS=Octopus bimaculoides OX=37653 GN=OCBIM_22015514mg PE=3 SV=1	1126.6	1127.36	395	404	SIHDALCVIR	0.558317	10
>tr|A0A6P7SKR8|A0A6P7SKR8_OCTVU Vesicle-fusing ATPase OS=Octopus vulgaris OX=6645 GN=LOC115213827 PE=4 SV=1 >tr|A0A0L8GAT1|A0A0L8GAT1_OCTBM Vesicle-fusing ATPase OS=Octopus bimaculoides OX=37653 GN=OCBIM_22037045mg PE=4 SV=1	1179.64	1180.35	5	15	GSDYLATAILR	0.557974	11
>tr|A0A7E6FT44|A0A7E6FT44_OCTVU 4-hydroxyphenylpyruvate dioxygenase OS=Octopus vulgaris OX=6645 GN=LOC115226087 PE=3 SV=1	814.432	814.928	204	209	NLQFHR	0.557859	6
>tr|A0A6P7TV68|A0A6P7TV68_OCTVU 26S proteasome non-ATPase regulatory subunit 6 OS=Octopus vulgaris OX=6645 GN=LOC115229467 PE=3 SV=1	1773.97	1775.07	14	29	NPDLQLAQSVFLLSTK	0.557443	16
>tr|A0A6P7SI10|A0A6P7SI10_OCTVU CD109 antigen isoform X2 OS=Octopus vulgaris OX=6645 GN=LOC115213260 PE=4 SV=1	2448.16	2449.85	737	755	KPTEFYSYQPFFLFMDYPK	0.557356	19
>tr|A0A7E6EZI8|A0A7E6EZI8_OCTVU uncharacterized protein LOC115214248 OS=Octopus vulgaris OX=6645 GN=LOC115214248 PE=4 SV=1	1132.53	1133.21	4129	4138	QEPSSADFLR	0.55734	10
>tr|A0A6P7TPW3|A0A6P7TPW3_OCTVU 2-phospho-D-glycerate hydro-lyase OS=Octopus vulgaris OX=6645 GN=LOC115224300 PE=3 SV=1	800.383	800.892	257	262	YDLDFK	0.557286	6
>tr|A0A0L8FKC8|A0A0L8FKC8_OCTBM 26S proteasome regulatory subunit 7 OS=Octopus bimaculoides OX=37653 GN=OCBIM_22017212mg PE=3 SV=1	1205.7	1206.48	148	157	YQIHIPLPPK	0.557129	10
>tr|A0A7E6EZI8|A0A7E6EZI8_OCTVU uncharacterized protein LOC115214248 OS=Octopus vulgaris OX=6645 GN=LOC115214248 PE=4 SV=1	1375.76	1376.61	2608	2621	DLLSILQGGAGGFK	0.556937	14
>tr|A0A0L8GLX8|A0A0L8GLX8_OCTBM S-formylglutathione hydrolase OS=Octopus bimaculoides OX=37653 GN=OCBIM_22031609mg PE=3 SV=1	2149.08	2150.41	212	231	NGSPFADILIDQGLADDFLK	0.556822	20
>tr|A0A812EMG1|A0A812EMG1_SEPPH DNAH OS=Sepia pharaonis OX=158019 GN=SPHA_78697 PE=4 SV=1	896.422	897.107	182	189	ISDMSLCK	0.556074	8
>tr|A0A0L8GJH5|A0A0L8GJH5_OCTBM Pyruvate kinase OS=Octopus bimaculoides OX=37653 GN=OCBIM_22032473mg PE=3 SV=1	1708.89	1710.01	224	240	GCNLPGIPVDLPAVSEK	0.555891	17
>Cluster-58773.187542;orf1 len=244 frame:-2 start:928 end:197 gi|524865670|ref|XP_005089662.1| PREDICTED: uncharacterized protein LOC101849508 [Aplysia californica]	846.483	847.011	210	216	VPLSQFR	0.55588	7
>tr|A0A6P7S5H1|A0A6P7S5H1_OCTVU Mannose-6-phosphate isomerase OS=Octopus vulgaris OX=6645 GN=LOC115209304 PE=3 SV=1	1164.64	1165.45	410	419	LEVGSMLLFR	0.555027	10
>tr|Q9BJ58|Q9BJ58_ENTDO Hemocyanin G-type (Fragment) OS=Enteroctopus dofleini OX=267067 PE=4 SV=2	2150.06	2151.52	1106	1124	KPMSPFSLTSDINIDPMTR	0.554949	19
>sp|O61363|HCYG_ENTDO Hemocyanin G-type, units Oda to Odg OS=Enteroctopus dofleini OX=267067 GN=ODHCY PE=1 SV=1	2182.05	2183.52	1077	1095	KPMSPFSLTSDINIDPMTR	0.554949	19
>tr|A0A6P7SKQ4|A0A6P7SKQ4_OCTVU actin, cytoplasmic OS=Octopus vulgaris OX=6645 GN=LOC115214120 PE=3 SV=1	1157.62	1158.41	316	326	EISALAPPTMK	0.554927	11
>tr|A0A6P7U2G4|A0A6P7U2G4_OCTVU uncharacterized protein LOC115232424 OS=Octopus vulgaris OX=6645 GN=LOC115232424 PE=4 SV=1	1400.72	1401.74	324	335	ICEDEIMPLIPK	0.554924	12
>tr|A0A6P7SDM4|A0A6P7SDM4_OCTVU lysosomal aspartic protease isoform X2 OS=Octopus vulgaris OX=6645 GN=LOC115211653 PE=3 SV=1	1542.8	1543.77	204	216	VVDSPVFSFYLNR	0.554458	13
>Cluster-58773.148525;orf1 len=812 frame:2 start:422 end:2857 gi|676447145|ref|XP_009051312.1| hypothetical protein LOTGIDRAFT_201834 [Lottia gigantea]>gi|556109335|gb|ESO97987.1| hypothetical protein LOTGIDRAFT_201834 [Lottia gigantea]	893.415	893.98	148	154	YGNPWEK	0.554346	7
>tr|A0A7E6FLF6|A0A7E6FLF6_OCTVU leukotriene A-4 hydrolase-like OS=Octopus vulgaris OX=6645 GN=LOC115223638 PE=3 SV=1	1263.6	1264.45	131	142	SFVPCQDSPGVK	0.554263	12
>Cluster-58773.127031;orf1 len=154 frame:-3 start:549 end:88 gi|405978782|gb|EKC43144.1| Nucleoside diphosphate kinase B [Crassostrea gigas]	865.46	866.076	33	40	GFQLVACK	0.554161	8
>tr|A0A6P7SYD8|A0A6P7SYD8_OCTVU neutral protease isoform X1 OS=Octopus vulgaris OX=6645 GN=LOC115217300 PE=3 SV=1	1075.56	1076.25	174	181	LAYYINYR	0.55404	8
>Cluster-58773.105280;orf1 len=426 frame:1 start:307 end:1584 gi|827883539|dbj|BAR90777.1| beta arrestin [Idiosepius paradoxus] >Cluster-58773.105276;orf1 len=426 frame:1 start:307 end:1584 gi|827883539|dbj|BAR90777.1| beta arrestin [Idiosepius paradoxus] >tr|A0A6P7SCX4|A0A6P7SCX4_OCTVU beta-arrestin-1 OS=Octopus vulgaris OX=6645 GN=LOC115211741 PE=3 SV=1	1171.49	1172.44	199	208	EFMMSPGNMK	0.553692	10
>Cluster-58773.168901;orf1 len=432 frame:1 start:457 end:1752 gi|762151209|ref|XP_011413584.1| PREDICTED: aspartate aminotransferase, mitochondrial-like, partial [Crassostrea gigas] >Cluster-58773.168923;orf1 len=432 frame:2 start:548 end:1843 gi|762151209|ref|XP_011413584.1| PREDICTED: aspartate aminotransferase, mitochondrial-like, partial [Crassostrea gigas]	1396.78	1397.63	16	29	LLPGASPHAGAIHR	0.553689	14
>tr|A0A6P7SEM8|A0A6P7SEM8_OCTVU Alpha-mannosidase OS=Octopus vulgaris OX=6645 GN=LOC115211875 PE=3 SV=1	835.431	835.941	805	811	LLFDDGR	0.553631	7
>tr|A0A6P7SKR8|A0A6P7SKR8_OCTVU Vesicle-fusing ATPase OS=Octopus vulgaris OX=6645 GN=LOC115213827 PE=4 SV=1 >tr|A0A0L8GAT1|A0A0L8GAT1_OCTBM Vesicle-fusing ATPase OS=Octopus bimaculoides OX=37653 GN=OCBIM_22037045mg PE=4 SV=1	1190.62	1191.44	237	248	GILMYGPPGTGK	0.55343	12
>tr|A0A0L8GJH5|A0A0L8GJH5_OCTBM Pyruvate kinase OS=Octopus bimaculoides OX=37653 GN=OCBIM_22032473mg PE=3 SV=1	1039.52	1040.13	533	542	SGSGFTNTLR	0.553398	10
>tr|A0A6P7U0P7|A0A6P7U0P7_OCTVU zinc finger ZZ-type and EF-hand domain-containing protein 1 OS=Octopus vulgaris OX=6645 GN=LOC115228010 PE=4 SV=1	1810.88	1812.13	1189	1206	FLGQLCGSTMSANPVTGK	0.553372	18
>Cluster-58773.122645;orf1 len=203 frame:1 start:178 end:786 gi|481054003|gb|AGJ98458.1| glutathione-S-transferase [Sepiella maindroni]	836.397	836.991	109	115	FAPENMK	0.553335	7
>Cluster-58773.94617;orf1 len=371 frame:1 start:124 end:1236 gi|405970764|gb|EKC35640.1| E3 ubiquitin-protein ligase TRAF7 [Crassostrea gigas]	1485.81	1486.72	244	258	QAGILAAAAIYGLDR	0.553314	15
>Cluster-58773.83035;orf1 len=470 frame:3 start:477 end:1886 gi|554820859|ref|XP_005921157.1| PREDICTED: thymidine phosphorylase-like isoform X1 [Haplochromis burtoni]	809.364	809.987	123	129	VPMMSGR	0.552898	7
>Cluster-58773.108885;orf1 len=1084 frame:2 start:158 end:3409 gi|667467110|sp|B3EWZ9.1|HEPHL_ACRMI RecName: Full=Hephaestin-like protein; Flags: Precursor [Acropora millepora]	1161.52	1162.25	112	120	QYTDFTFTR	0.552789	9
>Cluster-58773.190283;orf1 len=447 frame:2 start:353 end:1693 gi|617418760|ref|XP_007557771.1| PREDICTED: deoxynucleoside triphosphate triphosphohydrolase SAMHD1-like [Poecilia formosa]	2255.14	2256.7	417	435	YKPSELSNMLLLPSEFQMK	0.552659	19
>tr|A0A7E6FQN6|A0A7E6FQN6_OCTVU insulin-like growth factor-binding protein complex acid labile subunit isoform X7 OS=Octopus vulgaris OX=6645 GN=LOC115225305 PE=4 SV=1	810.418	810.996	1	6	MFQQLK	0.552472	6
>tr|A0A6P7U678|A0A6P7U678_OCTVU collagen alpha-4(VI) chain OS=Octopus vulgaris OX=6645 GN=LOC115232146 PE=4 SV=2	926.473	927.054	454	461	FLSGEFAR	0.552361	8
>tr|A0A6P7SI10|A0A6P7SI10_OCTVU CD109 antigen isoform X2 OS=Octopus vulgaris OX=6645 GN=LOC115213260 PE=4 SV=1	966.566	967.203	1329	1336	YLSLPFVK	0.552234	8
>Cluster-58773.163468;orf1 len=382 frame:1 start:88 end:1233 gi|410935705|gb|AFV94409.1| thioester-containing protein 1 [Euprymna scolopes]	966.566	967.203	306	313	YLSLPFVK	0.552234	8
>tr|A0A0L8GC35|A0A0L8GC35_OCTBM N-acyl-L-amino-acid amidohydrolase OS=Octopus bimaculoides OX=37653 GN=OCBIM_22036825mg PE=3 SV=1	1000.49	1001.2	273	280	FTVCFDIR	0.551658	8
>tr|A0A7E6FJ93|A0A7E6FJ93_OCTVU Annexin OS=Octopus vulgaris OX=6645 GN=LOC115223011 PE=3 SV=1	976.492	977.177	338	345	QQIAQMFK	0.551592	8
>tr|Q24925|Q24925_EUPSC Peroxidase-like protein (Fragment) OS=Euprymna scolopes OX=6613 PE=2 SV=1	823.394	823.886	309	315	SSTPFER	0.551272	7
>tr|A0A0L8FXZ4|A0A0L8FXZ4_OCTBM Uncharacterized protein OS=Octopus bimaculoides OX=37653 GN=OCBIM_22004572mg PE=4 SV=1	2770.55	2772.28	287	312	YLAIFVPPLTVLGSNLITANLVGDNR	0.55112	26
>tr|A0A6P7SER3|A0A6P7SER3_OCTVU hemocyanin 1-like OS=Octopus vulgaris OX=6645 GN=LOC115212215 PE=4 SV=2	1651.78	1652.94	1903	1917	GLSAYESHCALELMK	0.550752	15
>tr|A0A6P7SDC4|A0A6P7SDC4_OCTVU hemocyanin G-type, units Oda to Odg OS=Octopus vulgaris OX=6645 GN=LOC115211670 PE=4 SV=2	1651.78	1652.94	1922	1936	GLSAYESHCALELMK	0.550752	15
>Cluster-58773.162319;orf1 len=2921 frame:3 start:24 end:8786 gi|16596797|gb|AAK28276.2| hemocyanin G-type [Enteroctopus dofleini]	1651.78	1652.94	1926	1940	GLSAYESHCALELMK	0.550752	15
>tr|A0A7E6FRZ6|A0A7E6FRZ6_OCTVU hemocyanin G-type, units Oda to Odg-like OS=Octopus vulgaris OX=6645 GN=LOC115225590 PE=4 SV=1	2216.03	2217.41	2222	2239	SDYYDAWNDVVIENPFLR	0.550458	18
>tr|A0A6P7T066|A0A6P7T066_OCTVU Glyceraldehyde-3-phosphate dehydrogenase OS=Octopus vulgaris OX=6645 GN=LOC115217845 PE=3 SV=1	811.413	811.984	227	233	LTGMAFR	0.550311	7
>Cluster-58773.160890;orf1 len=401 frame:2 start:1043 end:2245 gi|300518909|gb|ADK25704.1| glyceraldehyde-3-phosphate dehydrogenase [Cancer borealis] >Cluster-58773.160894;orf1 len=401 frame:3 start:45 end:1247 gi|300518909|gb|ADK25704.1| glyceraldehyde-3-phosphate dehydrogenase [Cancer borealis]	811.413	811.984	292	298	LTGMAFR	0.550311	7
>tr|A0A6P7T914|A0A6P7T914_OCTVU thyroglobulin isoform X2 OS=Octopus vulgaris OX=6645 GN=LOC115220711 PE=4 SV=1	2738.36	2740.12	6	29	DEDFLDSPQNLFAVVQDLLLSTMK	0.550192	24
>tr|A0A6P7SKR8|A0A6P7SKR8_OCTVU Vesicle-fusing ATPase OS=Octopus vulgaris OX=6645 GN=LOC115213827 PE=4 SV=1 >tr|A0A0L8GAT1|A0A0L8GAT1_OCTBM Vesicle-fusing ATPase OS=Octopus bimaculoides OX=37653 GN=OCBIM_22037045mg PE=4 SV=1	1051.52	1052.24	43	50	MDELQLFR	0.550186	8
>Cluster-58773.156686;orf1 len=474 frame:3 start:477 end:1898 gi|762073747|ref|XP_011435353.1| PREDICTED: serine hydroxymethyltransferase, cytosolic-like [Crassostrea gigas]>gi|405966819|gb|EKC32056.1| Serine hydroxymethyltransferase, cytosolic [Crassostrea gigas]	1627.83	1629.01	411	424	QVVEFMHQGILLCK	0.550117	14
>tr|A0A7E6EY74|A0A7E6EY74_OCTVU twitchin OS=Octopus vulgaris OX=6645 GN=LOC115213975 PE=3 SV=1	1130.63	1131.33	3067	3076	SVSLAWSRPK	0.549884	10
>tr|A0A6P7TYT0|A0A6P7TYT0_OCTVU Histidine--tRNA ligase OS=Octopus vulgaris OX=6645 GN=LOC115230998 PE=3 SV=2	1192.5	1193.39	287	296	YCDIYGCLDK	0.549852	10
>Cluster-58773.174459;orf1 len=349 frame:-1 start:1047 end:1 gi|676459799|ref|XP_009055418.1| hypothetical protein LOTGIDRAFT_153262 [Lottia gigantea]>gi|556105140|gb|ESO93792.1| hypothetical protein LOTGIDRAFT_153262 [Lottia gigantea]	1192.5	1193.39	312	321	YCDIYGCLDK	0.549852	10
>tr|A0A6P7TKE4|A0A6P7TKE4_OCTVU probable aminopeptidase NPEPL1 isoform X1 OS=Octopus vulgaris OX=6645 GN=LOC115223934 PE=3 SV=1	1781.01	1782.11	262	278	AASHPPALVVLSHKPEK	0.549825	17
>Cluster-58773.135700;orf1 len=265 frame:3 start:75 end:869 gi|283837550|dbj|BAI66447.1| serine protease 1 [Heterololigo bleekeri]	1289.73	1290.68	131	142	LGKPILMSTCVK	0.549811	12
>tr|A0A6P7TG88|A0A6P7TG88_OCTVU chymotrypsin B-like OS=Octopus vulgaris OX=6645 GN=LOC115222971 PE=4 SV=1	1289.73	1290.68	129	140	LGKPILMSTCVK	0.549811	12
>tr|A0A6P7T914|A0A6P7T914_OCTVU thyroglobulin isoform X2 OS=Octopus vulgaris OX=6645 GN=LOC115220711 PE=4 SV=1	964.47	965.188	102	110	CGLNLVCSR	0.549811	9
>tr|A0A6P7SKR8|A0A6P7SKR8_OCTVU Vesicle-fusing ATPase OS=Octopus vulgaris OX=6645 GN=LOC115213827 PE=4 SV=1 >tr|A0A0L8GAT1|A0A0L8GAT1_OCTBM Vesicle-fusing ATPase OS=Octopus bimaculoides OX=37653 GN=OCBIM_22037045mg PE=4 SV=1	837.53	838.047	229	236	AIGVKPPR	0.549664	8
>tr|A0A6P7TPR7|A0A6P7TPR7_OCTVU uncharacterized protein LOC115224696 OS=Octopus vulgaris OX=6645 GN=LOC115224696 PE=4 SV=2	990.519	991.207	26	33	WNIVLCSR	0.549625	8
>tr|A0A6P7SE31|A0A6P7SE31_OCTVU 26S proteasome non-ATPase regulatory subunit 2 OS=Octopus vulgaris OX=6645 GN=LOC115211842 PE=3 SV=1	1837.92	1839.07	353	370	QNLAASFVNGFVNAAFGK	0.549557	18
>tr|A0A077B6R8|A0A077B6R8_EUPSC Hemocyanin subunit 1 OS=Euprymna scolopes OX=6613 GN=HCY1 PE=2 SV=1	3275.56	3277.68	1505	1533	LPYNEANCALPLLNEPMRPFSNSTANQDR	0.549245	29
>Cluster-58773.74875;orf1 len=741 frame:2 start:1832 end:4054 gi|159006|gb|AAA16244.1| peroxidase-like protein, partial [Euprymna scolopes]	1768.76	1769.9	152	167	TADGSCNNLENPYWGK	0.548919	16
>tr|A0A7E6FFI6|A0A7E6FFI6_OCTVU chorion peroxidase-like OS=Octopus vulgaris OX=6645 GN=LOC115221248 PE=4 SV=1	1768.76	1769.9	22	37	TADGSCNNLENPYWGK	0.548919	16
>tr|A0A6P7T444|A0A6P7T444_OCTVU transforming growth factor-beta-induced protein ig-h3-like OS=Octopus vulgaris OX=6645 GN=LOC115219504 PE=4 SV=1	1753.99	1755.19	3	19	ALFLIVLCVVGASAYSK	0.548825	17
>tr|A0A7E6EY74|A0A7E6EY74_OCTVU twitchin OS=Octopus vulgaris OX=6645 GN=LOC115213975 PE=3 SV=1	2202.11	2203.47	2278	2298	VSWNPPADLGGVDVSGYVLEK	0.54847	21
>tr|A0A0L8G659|A0A0L8G659_OCTBM IF rod domain-containing protein OS=Octopus bimaculoides OX=37653 GN=OCBIM_22000068mg PE=3 SV=1	1102.55	1103.23	2244	2253	SSAPESHFIK	0.548458	10
>tr|A0A6P7S854|A0A6P7S854_OCTVU neuroglian isoform X1 OS=Octopus vulgaris OX=6645 GN=LOC115210201 PE=4 SV=1	945.54	946.141	444	452	GDVAVFPIK	0.548385	9
>Cluster-58773.148525;orf1 len=812 frame:2 start:422 end:2857 gi|676447145|ref|XP_009051312.1| hypothetical protein LOTGIDRAFT_201834 [Lottia gigantea]>gi|556109335|gb|ESO97987.1| hypothetical protein LOTGIDRAFT_201834 [Lottia gigantea]	1233.56	1234.49	33	42	FNDSVYMVMK	0.548326	10
>tr|A0A812CTD3|A0A812CTD3_SEPPH Hypothetical protein OS=Sepia pharaonis OX=158019 GN=SPHA_40360 PE=4 SV=1	965.509	966.131	167	174	NYFIPSPK	0.548067	8
>tr|A0A7E6EY74|A0A7E6EY74_OCTVU twitchin OS=Octopus vulgaris OX=6645 GN=LOC115213975 PE=3 SV=1	1162.63	1163.37	3098	3107	WKPATDFAVK	0.547838	10
>tr|A0A6P7TRC4|A0A6P7TRC4_OCTVU myosin heavy chain, striated muscle OS=Octopus vulgaris OX=6645 GN=LOC115225111 PE=3 SV=2	1429.84	1430.74	285	298	VAFLLGVNAGDLLK	0.547625	14
>tr|A0A0L8GUX3|A0A0L8GUX3_OCTBM Uncharacterized protein OS=Octopus bimaculoides OX=37653 GN=OCBIM_22027429mg PE=3 SV=1	1359.71	1360.56	313	325	SITPVGGFPHYGK	0.547368	13
>tr|A0A077B6R8|A0A077B6R8_EUPSC Hemocyanin subunit 1 OS=Euprymna scolopes OX=6613 GN=HCY1 PE=2 SV=1	852.505	853.018	1458	1465	IHSLLGGR	0.547229	8
>tr|A0A6P7U0P7|A0A6P7U0P7_OCTVU zinc finger ZZ-type and EF-hand domain-containing protein 1 OS=Octopus vulgaris OX=6645 GN=LOC115228010 PE=4 SV=1	1566.78	1567.79	827	840	QLIYDGAAVFFPDK	0.546916	14
>tr|A0A6P7TFQ1|A0A6P7TFQ1_OCTVU Tetraspanin OS=Octopus vulgaris OX=6645 GN=LOC115222869 PE=3 SV=1	1576.71	1577.77	181	194	YQTGCADAFISWSK	0.546797	14
>tr|A0A7E6FLF6|A0A7E6FLF6_OCTVU leukotriene A-4 hydrolase-like OS=Octopus vulgaris OX=6645 GN=LOC115223638 PE=3 SV=1	844.434	845.014	321	328	LGCGEPLR	0.546776	8
>tr|A0A7E6EZI8|A0A7E6EZI8_OCTVU uncharacterized protein LOC115214248 OS=Octopus vulgaris OX=6645 GN=LOC115214248 PE=4 SV=1	3948.81	3951.64	289	323	FFELSMTVMSHPWCVLQAVNGEANLDMGFISDTMK	0.546486	35
>tr|A0A7E6EUH0|A0A7E6EUH0_OCTVU crystallin J1A OS=Octopus vulgaris OX=6645 GN=LOC115212045 PE=4 SV=1	1471.74	1472.72	262	274	DKPHVDVACNVFK	0.546102	13
>tr|A0A7E6FE51|A0A7E6FE51_OCTVU filamin-A isoform X1 OS=Octopus vulgaris OX=6645 GN=LOC115220251 PE=3 SV=1	1993.06	1994.38	230	246	WLDVPQLIKPAEMNNPK	0.545982	17
>tr|A0A6P7TS50|A0A6P7TS50_OCTVU Glutamate--cysteine ligase OS=Octopus vulgaris OX=6645 GN=LOC115225878 PE=3 SV=2	1858.97	1860.13	128	144	QFLGPNESLVSLTAFPR	0.545978	17
>tr|A0A7E6FDU1|A0A7E6FDU1_OCTVU Glucose-6-phosphate 1-dehydrogenase OS=Octopus vulgaris OX=6645 GN=LOC115220357 PE=3 SV=1	897.41	897.969	436	442	FPDAYER	0.545767	7
>tr|A0A6P7TG43|A0A6P7TG43_OCTVU GDP-4-keto-6-deoxy-D-mannose-3,5-epimerase-4-reductase OS=Octopus vulgaris OX=6645 GN=LOC115222310 PE=3 SV=1	1948.09	1949.39	60	77	TKPTHVIHLAAMVGGLFR	0.54522	18
>tr|A0A6P7SUK9|A0A6P7SUK9_OCTVU Adenosylhomocysteinase OS=Octopus vulgaris OX=6645 GN=LOC115216611 PE=3 SV=1	832.456	832.981	1	8	MASKPPYK	0.544752	8
>tr|A0A6P7TQ10|A0A6P7TQ10_OCTVU uncharacterized protein LOC115225177 OS=Octopus vulgaris OX=6645 GN=LOC115225177 PE=4 SV=1	2169.99	2171.41	416	433	DCDIDQFSFFAVEVIHER	0.544525	18
>tr|A0A7E6EY74|A0A7E6EY74_OCTVU twitchin OS=Octopus vulgaris OX=6645 GN=LOC115213975 PE=3 SV=1	1003.54	1004.2	153	162	LAAGGNITMR	0.544363	10
>tr|A0A0L8FTG9|A0A0L8FTG9_OCTBM Amine oxidase OS=Octopus bimaculoides OX=37653 GN=OCBIM_22008553mg PE=3 SV=1	2548.23	2549.99	171	191	VNVTCEPYECSLLWFLNYVQK	0.544341	21
>tr|A0A6P7SWF0|A0A6P7SWF0_OCTVU probable methylmalonate-semialdehyde dehydrogenase [acylating], mitochondrial OS=Octopus vulgaris OX=6645 GN=LOC115217127 PE=3 SV=1	1476.73	1477.8	102	113	QQCMFNLQQLIK	0.54426	12
>tr|Q27Q56|Q27Q56_SEPOF Hemocyanin subunit 2 (Fragment) OS=Sepia officinalis OX=6610 PE=2 SV=1	1525.86	1526.84	650	661	LWAIWQALQIQR	0.544185	12
>tr|A0A812CBN1|A0A812CBN1_SEPPH Uncharacterized protein OS=Sepia pharaonis OX=158019 GN=SPHA_33848 PE=4 SV=1	1525.86	1526.84	227	238	LWAIWQALQIQR	0.544185	12
>tr|W6CNR9|W6CNR9_SEPOF Hemocyanin subunit 3 OS=Sepia officinalis OX=6610 PE=2 SV=1	1525.86	1526.84	667	678	LWAIWQALQIQR	0.544185	12
>tr|A0A812CD65|A0A812CD65_SEPPH Uncharacterized protein OS=Sepia pharaonis OX=158019 GN=SPHA_33819 PE=4 SV=1	1525.86	1526.84	669	680	LWAIWQALQIQR	0.544185	12
>Cluster-960.0;orf1 len=210 frame:1 start:22 end:651 gi|164608848|gb|ABY62755.1| sarcoplasmic calcium-binding protein [Artemia franciscana]	1083.52	1084.29	73	80	LYMDLWDK	0.544049	8
>tr|A0A7E6FE51|A0A7E6FE51_OCTVU filamin-A isoform X1 OS=Octopus vulgaris OX=6645 GN=LOC115220251 PE=3 SV=1	1920.05	1921.33	444	461	VPGVHTISIVFCGQPIPR	0.543207	18
>tr|A0A0L8GIJ0|A0A0L8GIJ0_OCTBM VWFA domain-containing protein (Fragment) OS=Octopus bimaculoides OX=37653 GN=OCBIM_22032938mg PE=4 SV=1	1049.49	1050.25	190	198	CLQQCLEGR	0.543179	9
>tr|A0A0L8GW99|A0A0L8GW99_OCTBM Uncharacterized protein OS=Octopus bimaculoides OX=37653 GN=OCBIM_22026800mg PE=3 SV=1	1416.61	1417.61	229	241	GSSTCNLIFEDCK	0.542969	13
>tr|A0A077B6R8|A0A077B6R8_EUPSC Hemocyanin subunit 1 OS=Euprymna scolopes OX=6613 GN=HCY1 PE=2 SV=1	1306.63	1307.59	2983	2994	IASYHGMPLSCK	0.542762	12
>tr|A0A6P7U2G4|A0A6P7U2G4_OCTVU uncharacterized protein LOC115232424 OS=Octopus vulgaris OX=6645 GN=LOC115232424 PE=4 SV=1	996.436	997.127	468	474	YNFEMHR	0.542632	7
>tr|A0A0L8FFZ3|A0A0L8FFZ3_OCTBM Tyrosinase_Cu-bd domain-containing protein (Fragment) OS=Octopus bimaculoides OX=37653 GN=OCBIM_22022789mg PE=4 SV=1	1424.83	1425.77	265	276	IFPHPTIIYVPK	0.542364	12
>tr|A0A6P7SH66|A0A6P7SH66_OCTVU alpha-actinin, sarcomeric isoform X3 OS=Octopus vulgaris OX=6645 GN=LOC115212896 PE=4 SV=1	2709.24	2710.96	116	140	SVMAYVSSYYHAFSGAQQAETAANR	0.542354	25
>tr|A0A7E6EY74|A0A7E6EY74_OCTVU twitchin OS=Octopus vulgaris OX=6645 GN=LOC115213975 PE=3 SV=1	2009.1	2010.35	1658	1676	VIDKPTPPGAPLDVSDIFK	0.542242	19
>tr|A0A6P7SVM2|A0A6P7SVM2_OCTVU Spectrin beta chain OS=Octopus vulgaris OX=6645 GN=LOC115216977 PE=3 SV=1	1378.68	1379.59	1972	1983	EENFAICINLGR	0.542137	12
>tr|A0A812CC32|A0A812CC32_SEPPH Cilia- and flagella-associated protein 65 OS=Sepia pharaonis OX=158019 GN=SPHA_36641 PE=4 SV=1	2835.44	2837.36	46	71	HLCHLLMNGVFPSFIITDIHGQGSAK	0.541676	26
>tr|A0A6P7SKQ5|A0A6P7SKQ5_OCTVU tropomyosin-2 OS=Octopus vulgaris OX=6645 GN=LOC115213976 PE=3 SV=1	1300.62	1301.51	39	48	IQDDYMFLQK	0.541526	10
>tr|A0A0L8G0N4|A0A0L8G0N4_OCTBM Prolyl endopeptidase OS=Octopus bimaculoides OX=37653 GN=OCBIM_22003476mg PE=3 SV=1	2300.18	2301.73	415	433	SEEIFIHFMSFLTPGIIYR	0.540805	19
>tr|Q27Q56|Q27Q56_SEPOF Hemocyanin subunit 2 (Fragment) OS=Sepia officinalis OX=6610 PE=2 SV=1	1947	1948.2	1240	1257	LESSVIFELGLGHFGEGR	0.540647	18
>tr|A0A7E6FRZ6|A0A7E6FRZ6_OCTVU hemocyanin G-type, units Oda to Odg-like OS=Octopus vulgaris OX=6645 GN=LOC115225590 PE=4 SV=1	1474.67	1475.63	2749	2761	GLPYDSANCEIHR	0.540499	13
>Cluster-58773.187542;orf1 len=244 frame:-2 start:928 end:197 gi|524865670|ref|XP_005089662.1| PREDICTED: uncharacterized protein LOC101849508 [Aplysia californica]	806.383	806.902	150	155	QYAQWK	0.540189	6
>tr|A0A6P7U0P7|A0A6P7U0P7_OCTVU zinc finger ZZ-type and EF-hand domain-containing protein 1 OS=Octopus vulgaris OX=6645 GN=LOC115228010 PE=4 SV=1	993.351	994.056	352	360	CHSDGCDTR	0.540137	9
>tr|A0A6P7SJH5|A0A6P7SJH5_OCTVU cytosolic non-specific dipeptidase OS=Octopus vulgaris OX=6645 GN=LOC115213824 PE=3 SV=1	1610.72	1611.89	209	222	GICYFFVEVECSSK	0.539709	14
>Cluster-58773.127031;orf1 len=154 frame:-3 start:549 end:88 gi|405978782|gb|EKC43144.1| Nucleoside diphosphate kinase B [Crassostrea gigas]	1050.56	1051.24	130	137	EINLWFTK	0.539611	8
>tr|A0A6P7TPC1|A0A6P7TPC1_OCTVU uncharacterized protein LOC115224175 isoform X1 OS=Octopus vulgaris OX=6645 GN=LOC115224175 PE=4 SV=1	894.377	894.987	424	430	DNTCQWK	0.539568	7
>Cluster-58773.74875;orf1 len=741 frame:2 start:1832 end:4054 gi|159006|gb|AAA16244.1| peroxidase-like protein, partial [Euprymna scolopes]	1179.59	1180.32	74	83	TRPSSYFHGK	0.539511	10
>tr|A0A7E6F1S6|A0A7E6F1S6_OCTVU microtubule-associated protein futsch isoform X4 OS=Octopus vulgaris OX=6645 GN=LOC115215514 PE=4 SV=1	1255.66	1256.46	451	461	IFFPGNAPQHK	0.5395	11
>Cluster-960.0;orf1 len=210 frame:1 start:22 end:651 gi|164608848|gb|ABY62755.1| sarcoplasmic calcium-binding protein [Artemia franciscana]	1020.43	1021.11	17	24	MANNWDNR	0.539356	8
>tr|A0A0L8H0K9|A0A0L8H0K9_OCTBM Proteasome subunit alpha type OS=Octopus bimaculoides OX=37653 GN=OCBIM_22024847mg PE=3 SV=1	3492.62	3495.02	126	157	RPFGVGLLVAGYDGMGPHIYQTCPSANYYDCK	0.539183	32
>tr|A0A6P7TRV9|A0A6P7TRV9_OCTVU Ubiquitin-activating enzyme E1 OS=Octopus vulgaris OX=6645 GN=LOC115225288 PE=3 SV=1	874.507	875.125	633	640	SIPICTLK	0.53917	8
>tr|A0A6P7SYN9|A0A6P7SYN9_OCTVU barrier-to-autointegration factor B OS=Octopus vulgaris OX=6645 GN=LOC115217368 PE=4 SV=1	1492.85	1493.8	42	54	AYNVLGQFLLLNK	0.538844	13
>tr|Q27Q56|Q27Q56_SEPOF Hemocyanin subunit 2 (Fragment) OS=Sepia officinalis OX=6610 PE=2 SV=1	2051.99	2053.38	1089	1107	KPMSPFSLASDINADAMTR	0.538794	19
>tr|A0A6P7U7W9|A0A6P7U7W9_OCTVU putative aminopeptidase W07G4.4 isoform X1 OS=Octopus vulgaris OX=6645 GN=LOC115232621 PE=3 SV=1	1353.69	1354.68	21	32	FDCVVLVTNCIK	0.538594	12
>tr|A0A6P7TRC4|A0A6P7TRC4_OCTVU myosin heavy chain, striated muscle OS=Octopus vulgaris OX=6645 GN=LOC115225111 PE=3 SV=2	1032.47	1033.09	1853	1862	GSGYSATFSR	0.537805	10
>tr|A0A6P7TV68|A0A6P7TV68_OCTVU 26S proteasome non-ATPase regulatory subunit 6 OS=Octopus vulgaris OX=6645 GN=LOC115229467 PE=3 SV=1	928.438	929.155	186	193	GVYCMSIR	0.537254	8
>tr|A0A7E6EZI8|A0A7E6EZI8_OCTVU uncharacterized protein LOC115214248 OS=Octopus vulgaris OX=6645 GN=LOC115214248 PE=4 SV=1	1713.74	1714.86	2822	2836	ECEDAGFPELGYDLR	0.53719	15
>tr|A0A6P7SGA6|A0A6P7SGA6_OCTVU Clathrin heavy chain OS=Octopus vulgaris OX=6645 GN=LOC115212844 PE=3 SV=1	1216.61	1217.38	1335	1343	EHLELFWSR	0.537135	9
>tr|Q27Q56|Q27Q56_SEPOF Hemocyanin subunit 2 (Fragment) OS=Sepia officinalis OX=6610 PE=2 SV=1	1619.83	1620.86	2727	2738	LWAIWQDLQQYR	0.536968	12
>tr|A0A6P7T066|A0A6P7T066_OCTVU Glyceraldehyde-3-phosphate dehydrogenase OS=Octopus vulgaris OX=6645 GN=LOC115217845 PE=3 SV=1	2293.13	2294.75	29	47	VVAINDPFIDLDYMVYMFK	0.536967	19
>Cluster-58773.104829;orf1 len=394 frame:3 start:15 end:1196 gi|524910869|ref|XP_005110308.1| PREDICTED: calumenin-like isoform X2 [Aplysia californica]	981.468	982.087	234	241	WAYADLDK	0.536815	8
>tr|A0A6P7SQT5|A0A6P7SQT5_OCTVU cathepsin L1-like OS=Octopus vulgaris OX=6645 GN=LOC115215560 PE=3 SV=1	1116.53	1117.21	118	126	DLPDTVDWR	0.536502	9
>Cluster-58773.132040;orf1 len=167 frame:-2 start:502 end:2 gi|492370606|gb|AGL33705.1| cathepsin L2 [Sinonovacula constricta]	1116.53	1117.21	100	108	DLPDTVDWR	0.536502	9
>tr|A0A7E6EY74|A0A7E6EY74_OCTVU twitchin OS=Octopus vulgaris OX=6645 GN=LOC115213975 PE=3 SV=1	1980.92	1982.26	2829	2848	VCAVNAAGPGQFSECSEAIK	0.536201	20
>tr|A0A6P7T914|A0A6P7T914_OCTVU thyroglobulin isoform X2 OS=Octopus vulgaris OX=6645 GN=LOC115220711 PE=4 SV=1	1000.59	1001.22	132	140	NLLGAFIPR	0.536024	9
>Cluster-58773.108885;orf1 len=1084 frame:2 start:158 end:3409 gi|667467110|sp|B3EWZ9.1|HEPHL_ACRMI RecName: Full=Hephaestin-like protein; Flags: Precursor [Acropora millepora]	2287.25	2288.66	817	838	DHPESLGILGPIIIAEVGDTIK	0.53516	22
>tr|A0A0L8H9P1|A0A0L8H9P1_OCTBM Uncharacterized protein OS=Octopus bimaculoides OX=37653 GN=OCBIM_22019540mg PE=3 SV=1	1052.52	1053.23	88	97	FGGTLADCIR	0.535117	10
>tr|G0Y7C4|G0Y7C4_9MOLL Arginine kinase OS=Sepiella maindroni OX=153280 GN=AK PE=2 SV=1	1052.52	1053.23	40	49	FGGTLADCIR	0.535117	10
>Cluster-58773.161841;orf1 len=169 frame:-2 start:507 end:1 gi|340742817|gb|AEK65120.1| arginine kinase [Amphioctopus fangsiao]	1052.52	1053.23	32	41	FGGTLADCIR	0.535117	10
>tr|A0A7E6FRZ6|A0A7E6FRZ6_OCTVU hemocyanin G-type, units Oda to Odg-like OS=Octopus vulgaris OX=6645 GN=LOC115225590 PE=4 SV=1	993.519	994.208	1598	1606	IYICAPTGR	0.534444	9
>tr|A0A6P7T0G1|A0A6P7T0G1_OCTVU Phosphoglycerate kinase OS=Octopus vulgaris OX=6645 GN=LOC115218470 PE=3 SV=1	1687.88	1688.98	331	345	TIVWNGPPGVFEFPK	0.534444	15
>tr|A0A6P7SRT8|A0A6P7SRT8_OCTVU ATP synthase subunit beta OS=Octopus vulgaris OX=6645 GN=LOC115215584 PE=3 SV=1	1891.97	1893.17	15	31	AINPAFSFHNAYPTTLK	0.534029	17
>tr|Q27Q56|Q27Q56_SEPOF Hemocyanin subunit 2 (Fragment) OS=Sepia officinalis OX=6610 PE=2 SV=1	1342.73	1343.58	1474	1483	LWAIWQELQR	0.533794	10
>tr|A0A812CBN1|A0A812CBN1_SEPPH Uncharacterized protein OS=Sepia pharaonis OX=158019 GN=SPHA_33848 PE=4 SV=1	1342.73	1343.58	1049	1058	LWAIWQELQR	0.533794	10
>tr|A0A077B6R8|A0A077B6R8_EUPSC Hemocyanin subunit 1 OS=Euprymna scolopes OX=6613 GN=HCY1 PE=2 SV=1	1342.73	1343.58	1492	1501	LWAIWQELQR	0.533794	10
>tr|W6CNR9|W6CNR9_SEPOF Hemocyanin subunit 3 OS=Sepia officinalis OX=6610 PE=2 SV=1	1342.73	1343.58	1490	1499	LWAIWQELQR	0.533794	10
>tr|A0A812CD65|A0A812CD65_SEPPH Uncharacterized protein OS=Sepia pharaonis OX=158019 GN=SPHA_33819 PE=4 SV=1	1342.73	1343.58	1492	1501	LWAIWQELQR	0.533794	10
>tr|A0A7E6FRZ6|A0A7E6FRZ6_OCTVU hemocyanin G-type, units Oda to Odg-like OS=Octopus vulgaris OX=6645 GN=LOC115225590 PE=4 SV=1	1342.73	1343.58	1491	1500	LWAIWQELQR	0.533794	10
>tr|F0V3W2|F0V3W2_LEPCI Hemocyanin (Fragment) OS=Lepidochitona cinerea OX=256056 PE=2 SV=1	1342.73	1343.58	641	650	LWAIWQELQR	0.533794	10
>tr|A0A7E6EZI8|A0A7E6EZI8_OCTVU uncharacterized protein LOC115214248 OS=Octopus vulgaris OX=6645 GN=LOC115214248 PE=4 SV=1	1335.63	1336.46	2902	2912	SPHFYDAETLR	0.533704	11
>tr|A0A7E6EL05|A0A7E6EL05_OCTVU uncharacterized protein LOC115232539 isoform X1 OS=Octopus vulgaris OX=6645 GN=LOC115232539 PE=4 SV=1	994.499	995.13	1	9	MENFLGTWK	0.533682	9
>tr|A0A6P7S5H1|A0A6P7S5H1_OCTVU Mannose-6-phosphate isomerase OS=Octopus vulgaris OX=6645 GN=LOC115209304 PE=3 SV=1	1092.53	1093.19	31	40	LSQSGNPDFK	0.532551	10
>Cluster-58773.198809;orf1 len=296 frame:2 start:149 end:1036 gi|871209239|ref|XP_012941697.1| PREDICTED: carbonic anhydrase 1-like [Aplysia californica] >Cluster-58773.198805;orf1 len=296 frame:-3 start:932 end:45 gi|871209239|ref|XP_012941697.1| PREDICTED: carbonic anhydrase 1-like [Aplysia californica] >Cluster-58773.198810;orf1 len=296 frame:2 start:251 end:1138 gi|871209239|ref|XP_012941697.…	2885.38	2887.28	96	123	MSCVNNGLTFVATINGDNFISGGPLDTK	0.532512	28
>tr|A0A0L8G659|A0A0L8G659_OCTBM IF rod domain-containing protein OS=Octopus bimaculoides OX=37653 GN=OCBIM_22000068mg PE=3 SV=1	1827.89	1829.05	195	210	QNQQLADLEGEISMLR	0.532429	16
>Cluster-58773.104829;orf1 len=394 frame:3 start:15 end:1196 gi|524910869|ref|XP_005110308.1| PREDICTED: calumenin-like isoform X2 [Aplysia californica]	938.462	939.062	197	203	LDWETFK	0.532407	7
>tr|A0A077B6R8|A0A077B6R8_EUPSC Hemocyanin subunit 1 OS=Euprymna scolopes OX=6613 GN=HCY1 PE=2 SV=1	2180.08	2181.43	570	589	ANPFFSSAIEFLDAGVHTTR	0.532322	20
>tr|A0A7E6EZI8|A0A7E6EZI8_OCTVU uncharacterized protein LOC115214248 OS=Octopus vulgaris OX=6645 GN=LOC115214248 PE=4 SV=1	1958.84	1960.1	501	517	EDDEEGGYPSVCNYLLR	0.532151	17
>tr|A0A7E6ETN4|A0A7E6ETN4_OCTVU protein-glutamine gamma-glutamyltransferase K OS=Octopus vulgaris OX=6645 GN=LOC115211974 PE=3 SV=1	2801.37	2803.18	285	308	QFSDDVLECVLYLLEESELPLHAR	0.531819	24
>Cluster-58773.135700;orf1 len=265 frame:3 start:75 end:869 gi|283837550|dbj|BAI66447.1| serine protease 1 [Heterololigo bleekeri]	1424.75	1425.64	143	156	AIPLASPHTDFAGK	0.531691	14
>tr|A0A7E6EY74|A0A7E6EY74_OCTVU twitchin OS=Octopus vulgaris OX=6645 GN=LOC115213975 PE=3 SV=1	1600.79	1601.76	2455	2470	DPVFPAGSPSSPSLDK	0.531624	16
>tr|Q9BJ58|Q9BJ58_ENTDO Hemocyanin G-type (Fragment) OS=Enteroctopus dofleini OX=267067 PE=4 SV=2	1403.79	1404.7	2909	2921	YLSPPTVFLAPAK	0.531304	13
>sp|O61363|HCYG_ENTDO Hemocyanin G-type, units Oda to Odg OS=Enteroctopus dofleini OX=267067 GN=ODHCY PE=1 SV=1	1403.79	1404.7	2881	2893	YLSPPTVFLAPAK	0.531304	13
>tr|A0A6P7SER3|A0A6P7SER3_OCTVU hemocyanin 1-like OS=Octopus vulgaris OX=6645 GN=LOC115212215 PE=4 SV=2	2121.18	2122.49	5659	5677	LAKPLKPFNLESNHNAVTK	0.531216	19
>Cluster-58773.162319;orf1 len=2921 frame:3 start:24 end:8786 gi|16596797|gb|AAK28276.2| hemocyanin G-type [Enteroctopus dofleini]	2121.18	2122.49	2760	2778	LAKPLKPFNLESNHNAVTK	0.531216	19
>tr|F0V3W2|F0V3W2_LEPCI Hemocyanin (Fragment) OS=Lepidochitona cinerea OX=256056 PE=2 SV=1	1512.72	1513.72	705	717	YDNLNFNGMSIPK	0.531169	13
>tr|A0A7E6EY74|A0A7E6EY74_OCTVU twitchin OS=Octopus vulgaris OX=6645 GN=LOC115213975 PE=3 SV=1	1778.88	1780.07	3482	3497	QEVGKPYWITVSSACK	0.531155	16
>tr|A0A6P7U0P7|A0A6P7U0P7_OCTVU zinc finger ZZ-type and EF-hand domain-containing protein 1 OS=Octopus vulgaris OX=6645 GN=LOC115228010 PE=4 SV=1	2406.22	2407.76	2112	2134	DVYDPALIQCLVDLASQGTGLSK	0.531065	23
>tr|A0A6P7SKR8|A0A6P7SKR8_OCTVU Vesicle-fusing ATPase OS=Octopus vulgaris OX=6645 GN=LOC115213827 PE=4 SV=1 >tr|A0A0L8GAT1|A0A0L8GAT1_OCTBM Vesicle-fusing ATPase OS=Octopus bimaculoides OX=37653 GN=OCBIM_22037045mg PE=4 SV=1	1484.84	1485.77	636	648	LDQLIYIPLPDGK	0.53048	13
>tr|A0A7E6FQN6|A0A7E6FQN6_OCTVU insulin-like growth factor-binding protein complex acid labile subunit isoform X7 OS=Octopus vulgaris OX=6645 GN=LOC115225305 PE=4 SV=1	1213.5	1214.43	433	443	NLQCETCSGMK	0.530148	11
>tr|A0A7E6EU42|A0A7E6EU42_OCTVU rho GDP-dissociation inhibitor 1 isoform X1 OS=Octopus vulgaris OX=6645 GN=LOC115211966 PE=3 SV=1	1655.77	1656.93	141	154	DIVCGLNYTHCVYR	0.530144	14
>tr|A0A6P7TQA6|A0A6P7TQA6_OCTVU Parkinson disease protein 7 homolog OS=Octopus vulgaris OX=6645 GN=LOC115224773 PE=4 SV=1	1738.93	1740.15	97	114	TGLIAAICAGPTALMAHK	0.529795	18
>tr|A0A0L8I519|A0A0L8I519_OCTBM Sulfotransfer_1 domain-containing protein OS=Octopus bimaculoides OX=37653 GN=OCBIM_22034539mg PE=4 SV=1	2031.9	2033.28	166	182	ATEYTGDFPSFFDLYMK	0.529679	17
>tr|A0A812CG60|A0A812CG60_SEPPH ARF1_2 OS=Sepia pharaonis OX=158019 GN=SPHA_38611 PE=3 SV=1	1097.54	1098.21	62	70	NSTWGTYLR	0.529623	9
>tr|A0A7E6FRZ6|A0A7E6FRZ6_OCTVU hemocyanin G-type, units Oda to Odg-like OS=Octopus vulgaris OX=6645 GN=LOC115225590 PE=4 SV=1	1245.74	1246.55	2417	2427	VFATFLLHGIK	0.529528	11
>tr|A0A7E6FAL0|A0A7E6FAL0_OCTVU protein hu-li tai shao isoform X12 OS=Octopus vulgaris OX=6645 GN=LOC115218883 PE=3 SV=1	1193.73	1194.47	90	100	ASPVIPILDIR	0.529357	11
>tr|A0A0L8IH79|A0A0L8IH79_OCTBM Uncharacterized protein OS=Octopus bimaculoides OX=37653 GN=OCBIM_22005008mg PE=3 SV=1	821.407	821.974	351	357	DDSLLMK	0.529349	7
>tr|A0A6P7TRC4|A0A6P7TRC4_OCTVU myosin heavy chain, striated muscle OS=Octopus vulgaris OX=6645 GN=LOC115225111 PE=3 SV=2	963.497	964.179	572	579	CIIPNEFK	0.52918	8
>tr|A0A7E6EZI8|A0A7E6EZI8_OCTVU uncharacterized protein LOC115214248 OS=Octopus vulgaris OX=6645 GN=LOC115214248 PE=4 SV=1	1141.57	1142.43	491	500	GQYMLSIMAK	0.528804	10
>tr|A0A0L8G659|A0A0L8G659_OCTBM IF rod domain-containing protein OS=Octopus bimaculoides OX=37653 GN=OCBIM_22000068mg PE=3 SV=1	3187.29	3189.18	2266	2294	TFSETSATDEADNSYAESQQNGYDWGGEK	0.528758	29
>tr|A0A7E6FNE1|A0A7E6FNE1_OCTVU dystrophin isoform X4 OS=Octopus vulgaris OX=6645 GN=LOC115232614 PE=4 SV=1	1485.61	1486.68	587	598	AFCNWLDCQEEK	0.528639	12
>tr|A0A6P7TM22|A0A6P7TM22_OCTVU Tetratricopeptide repeat protein 38 OS=Octopus vulgaris OX=6645 GN=LOC115223987 PE=3 SV=1	2250.15	2251.62	382	400	EGDYAEVVELLMPIQFQLR	0.528619	19
>tr|A0A7E6ETD0|A0A7E6ETD0_OCTVU adenylyl cyclase-associated protein 1 isoform X4 OS=Octopus vulgaris OX=6645 GN=LOC115210264 PE=3 SV=1	2044.1	2045.35	86	104	KPSSEQPVSSLPFASELIK	0.528473	19
>tr|A0A6P7SVM2|A0A6P7SVM2_OCTVU Spectrin beta chain OS=Octopus vulgaris OX=6645 GN=LOC115216977 PE=3 SV=1	1474.74	1475.72	1037	1048	INDINNVWMDLK	0.528364	12
>tr|A0A7E6EY74|A0A7E6EY74_OCTVU twitchin OS=Octopus vulgaris OX=6645 GN=LOC115213975 PE=3 SV=1	1835.93	1837.12	3227	3246	VCAVNAGGVGEPSPPSGPIK	0.528297	20
>tr|A0A0L8G659|A0A0L8G659_OCTBM IF rod domain-containing protein OS=Octopus bimaculoides OX=37653 GN=OCBIM_22000068mg PE=3 SV=1	1889.02	1890.2	2168	2185	GLLPSSSVVASFPSWVQK	0.528171	18
>tr|A0A6P7SXS2|A0A6P7SXS2_OCTVU cell surface glycoprotein 1 isoform X6 OS=Octopus vulgaris OX=6645 GN=LOC115217577 PE=4 SV=1	949.462	950.042	295	302	SPEFDINK	0.528063	8
>tr|A0A7E6FNE1|A0A7E6FNE1_OCTVU dystrophin isoform X4 OS=Octopus vulgaris OX=6645 GN=LOC115232614 PE=4 SV=1	1843.92	1845.03	3326	3343	QLGEIASFGGSNIEPSVR	0.528039	18
>Cluster-58773.217011;orf1 len=333 frame:3 start:348 end:1346 gi|762104009|ref|XP_011434531.1| PREDICTED: prostaglandin reductase 1-like [Crassostrea gigas]>gi|405958743|gb|EKC24838.1| Prostaglandin reductase 1 [Crassostrea gigas]	1166.66	1167.4	268	277	ELSVFGFIVR	0.528002	10
>tr|A0A6P7TRV9|A0A6P7TRV9_OCTVU Ubiquitin-activating enzyme E1 OS=Octopus vulgaris OX=6645 GN=LOC115225288 PE=3 SV=1	1712.85	1713.9	641	654	NFPNSIEHTLQWAR	0.527621	14
>tr|A0A6P7U0P7|A0A6P7U0P7_OCTVU zinc finger ZZ-type and EF-hand domain-containing protein 1 OS=Octopus vulgaris OX=6645 GN=LOC115228010 PE=4 SV=1	2420.16	2421.75	1804	1823	EPLLLETCDEQFFSSHIHFK	0.527564	20
>tr|A0A6P7SYD8|A0A6P7SYD8_OCTVU neutral protease isoform X1 OS=Octopus vulgaris OX=6645 GN=LOC115217300 PE=3 SV=1	833.477	834.009	499	505	DLTPFIK	0.52756	7
>tr|A0A7E6ENX1|A0A7E6ENX1_OCTVU spectrin alpha chain isoform X2 OS=Octopus vulgaris OX=6645 GN=LOC115227715 PE=3 SV=1	1960.93	1962.14	2192	2208	QFAQAANAFHSWLTETR	0.527093	17
>tr|A0A6P7TGA0|A0A6P7TGA0_OCTVU Isocitrate dehydrogenase [NADP] OS=Octopus vulgaris OX=6645 GN=LOC115223822 PE=3 SV=1	1174.6	1175.4	130	139	MWLSPNGTIR	0.526464	10
>tr|A0A7E6EUU3|A0A7E6EUU3_OCTVU apoptosis-inducing factor 3 isoform X1 OS=Octopus vulgaris OX=6645 GN=LOC115213836 PE=4 SV=1	1883.04	1884.26	220	238	VNLLVGGGPASLICAETLR	0.526321	19
>tr|A0A7E6FDU1|A0A7E6FDU1_OCTVU Glucose-6-phosphate 1-dehydrogenase OS=Octopus vulgaris OX=6645 GN=LOC115220357 PE=3 SV=1	1072.65	1073.33	169	177	IIIEKPFGR	0.525979	9
>tr|A0A6P7SVY8|A0A6P7SVY8_OCTVU 3-ketoacyl-CoA thiolase, mitochondrial isoform X2 OS=Octopus vulgaris OX=6645 GN=LOC115217007 PE=3 SV=1	930.443	931.002	191	199	AAQDGGHFK	0.525932	9
>tr|A0A6P7T4Z8|A0A6P7T4Z8_OCTVU opine dehydrogenase OS=Octopus vulgaris OX=6645 GN=LOC115219799 PE=4 SV=1	3041.47	3043.45	228	254	DWDGKPVSEKPLFYQGLNDFAAGMLDK	0.52585	27
>tr|A0A0L8G235|A0A0L8G235_OCTBM Malate dehydrogenase OS=Octopus bimaculoides OX=37653 GN=OCBIM_22001700mg PE=3 SV=1	3606.59	3609.04	249	281	AICDHVHDWWHGVPSGTYVSMAVCSDGSYGIEK	0.52572	33
>tr|A0A7E6EY74|A0A7E6EY74_OCTVU twitchin OS=Octopus vulgaris OX=6645 GN=LOC115213975 PE=3 SV=1	1036.49	1037.09	4242	4250	GDHSNLTHR	0.525643	9
>tr|A0A6P7U4P1|A0A6P7U4P1_OCTVU deoxynucleoside triphosphate triphosphohydrolase SAMHD1-like isoform X2 OS=Octopus vulgaris OX=6645 GN=LOC115231345 PE=4 SV=1	3510.69	3513.02	90	120	DILCVEIAGLCHDLGHAPFSHAFQEIINEYR	0.52548	31
>tr|A0A6P7TGU1|A0A6P7TGU1_OCTVU actin-interacting protein 1 isoform X1 OS=Octopus vulgaris OX=6645 GN=LOC115223147 PE=4 SV=1	1402.69	1403.61	185	196	IDAHTNFVNCIR	0.525393	12
>tr|A0A6P7TDD8|A0A6P7TDD8_OCTVU guanine nucleotide-binding protein subunit beta-like protein OS=Octopus vulgaris OX=6645 GN=LOC115222872 PE=3 SV=1	1874.91	1876.15	157	173	FSPSTTHPIIVSCGWDK	0.525148	17
>tr|A0A7E6F2W5|A0A7E6F2W5_OCTVU Calreticulin OS=Octopus vulgaris OX=6645 GN=LOC115215618 PE=3 SV=1	1182.51	1183.23	26	34	EDFIDDSWR	0.525109	9
>tr|A0A6P7S9Z4|A0A6P7S9Z4_OCTVU Calmodulin OS=Octopus vulgaris OX=6645 GN=LOC115210643 PE=3 SV=1 >tr|A0A0L8I9I4|A0A0L8I9I4_OCTBM Calmodulin OS=Octopus bimaculoides OX=37653 GN=OCBIM_22028792mg PE=3 SV=1	956.472	957.077	15	22	EAFSLFDK	0.52427	8
>tr|A0A6P7S417|A0A6P7S417_OCTVU chloride intracellular channel exc-4 OS=Octopus vulgaris OX=6645 GN=LOC115208761 PE=4 SV=1	1388.78	1389.69	7	17	LTIPEFELWIK	0.523992	11
>tr|Q27Q56|Q27Q56_SEPOF Hemocyanin subunit 2 (Fragment) OS=Sepia officinalis OX=6610 PE=2 SV=1	1215.65	1216.43	226	235	QFALWQALQK	0.523932	10
>tr|A0A077B6R8|A0A077B6R8_EUPSC Hemocyanin subunit 1 OS=Euprymna scolopes OX=6613 GN=HCY1 PE=2 SV=1	1215.65	1216.43	244	253	QFALWQALQK	0.523932	10
>tr|W6CNR9|W6CNR9_SEPOF Hemocyanin subunit 3 OS=Sepia officinalis OX=6610 PE=2 SV=1	1215.65	1216.43	243	252	QFALWQALQK	0.523932	10
>tr|A0A812CD65|A0A812CD65_SEPPH Uncharacterized protein OS=Sepia pharaonis OX=158019 GN=SPHA_33819 PE=4 SV=1	1215.65	1216.43	245	254	QFALWQALQK	0.523932	10
>Cluster-58773.135700;orf1 len=265 frame:3 start:75 end:869 gi|283837550|dbj|BAI66447.1| serine protease 1 [Heterololigo bleekeri]	1773.76	1775.02	242	256	CEYGPAMYTSVSYFR	0.523518	15
>tr|A0A6P7TG88|A0A6P7TG88_OCTVU chymotrypsin B-like OS=Octopus vulgaris OX=6645 GN=LOC115222971 PE=4 SV=1	1773.76	1775.02	240	254	CEYGPAMYTSVSYFR	0.523518	15
>tr|A0A7E6ETN4|A0A7E6ETN4_OCTVU protein-glutamine gamma-glutamyltransferase K OS=Octopus vulgaris OX=6645 GN=LOC115211974 PE=3 SV=1	802.34	802.886	484	490	QGPQDMK	0.523285	7
>tr|A0A7E6FQN6|A0A7E6FQN6_OCTVU insulin-like growth factor-binding protein complex acid labile subunit isoform X7 OS=Octopus vulgaris OX=6645 GN=LOC115225305 PE=4 SV=1	1679.94	1681	262	275	NIKPELFQYLSSLK	0.523255	14
>tr|A0A6P7SVM2|A0A6P7SVM2_OCTVU Spectrin beta chain OS=Octopus vulgaris OX=6645 GN=LOC115216977 PE=3 SV=1	1107.6	1108.29	71	79	ISDLYLDLR	0.523066	9
>tr|A0A6P7SYQ3|A0A6P7SYQ3_OCTVU pancreatic triacylglycerol lipase-like OS=Octopus vulgaris OX=6645 GN=LOC115217380 PE=3 SV=1	1022.59	1023.23	405	412	LHHFLISR	0.522941	8
>tr|A0A6P7TSR4|A0A6P7TSR4_OCTVU Carboxypeptidase OS=Octopus vulgaris OX=6645 GN=LOC115226095 PE=3 SV=1	3140.83	3142.77	8	39	ALLVVGLVGVALITTATAAANEDLIHSLPGLK	0.522864	32
>tr|A0A6P7TXK0|A0A6P7TXK0_OCTVU medium-chain specific acyl-CoA dehydrogenase, mitochondrial OS=Octopus vulgaris OX=6645 GN=LOC115228127 PE=3 SV=1	920.404	921.028	229	235	EWNMGQR	0.522491	7
>tr|A0A7E6FNE1|A0A7E6FNE1_OCTVU dystrophin isoform X4 OS=Octopus vulgaris OX=6645 GN=LOC115232614 PE=4 SV=1	821.393	821.936	2036	2042	SQSLQCR	0.522278	7
>tr|A0A7E6EUU7|A0A7E6EUU7_OCTVU uncharacterized protein LOC118763595 OS=Octopus vulgaris OX=6645 GN=LOC118763595 PE=4 SV=1	1294.56	1295.55	66	77	NPMQGIGSCEMK	0.522182	12
>tr|A0A6P7SJ72|A0A6P7SJ72_OCTVU Glutamine--fructose-6-phosphate transaminase (isomerizing) OS=Octopus vulgaris OX=6645 GN=LOC115213781 PE=4 SV=1	2136.05	2137.44	108	126	SGLNNEFICVHNGIITNYK	0.521975	19
>tr|A0A6P7TSR4|A0A6P7TSR4_OCTVU Carboxypeptidase OS=Octopus vulgaris OX=6645 GN=LOC115226095 PE=3 SV=1	2372.13	2373.67	187	208	LLGEPSINFQGFAVGNGMSDYR	0.521828	22
>tr|A0A7E6EY74|A0A7E6EY74_OCTVU twitchin OS=Octopus vulgaris OX=6645 GN=LOC115213975 PE=3 SV=1	1089.52	1090.18	387	397	DPAPADGGVYK	0.5216	11
>Cluster-58773.83035;orf1 len=470 frame:3 start:477 end:1886 gi|554820859|ref|XP_005921157.1| PREDICTED: thymidine phosphorylase-like isoform X1 [Haplochromis burtoni]	2194.12	2195.69	285	303	DIMELVTHQGAHLLLMMNK	0.520988	19
>Cluster-58773.197059;orf1 len=509 frame:1 start:352 end:1878 gi|260816652|ref|XP_002603202.1| hypothetical protein BRAFLDRAFT_281736 [Branchiostoma floridae]>gi|229288519|gb|EEN59213.1| hypothetical protein BRAFLDRAFT_281736 [Branchiostoma floridae]	2272.1	2273.59	232	251	GPENALMPNWTYLPVGYHGR	0.520911	20
>tr|A0A6P7TMY2|A0A6P7TMY2_OCTVU Fumarylacetoacetase OS=Octopus vulgaris OX=6645 GN=LOC115226547 PE=3 SV=2	2272.1	2273.59	165	184	GPENALMPNWTYLPVGYHGR	0.520911	20
>Cluster-58773.187542;orf1 len=244 frame:-2 start:928 end:197 gi|524865670|ref|XP_005089662.1| PREDICTED: uncharacterized protein LOC101849508 [Aplysia californica]	1511.83	1512.8	126	138	TLPGVFNYFINVK	0.520796	13
>tr|A0A6P7S965|A0A6P7S965_OCTVU ras GTPase-activating protein-binding protein 2 OS=Octopus vulgaris OX=6645 GN=LOC115210285 PE=4 SV=1	2642.37	2644.02	222	246	TPEPEPVPEAPVEPKPVSWASLASK	0.520787	25
>tr|A0A6P7SVY8|A0A6P7SVY8_OCTVU 3-ketoacyl-CoA thiolase, mitochondrial isoform X2 OS=Octopus vulgaris OX=6645 GN=LOC115217007 PE=3 SV=1	1844.97	1846.07	339	358	TNPNGGAIALGHPLAASGAR	0.520685	20
>tr|A0A7E6FE51|A0A7E6FE51_OCTVU filamin-A isoform X1 OS=Octopus vulgaris OX=6645 GN=LOC115220251 PE=3 SV=1	1487.69	1488.61	2090	2101	FNDEHIPESPFR	0.520675	12
>Cluster-58773.132040;orf1 len=167 frame:-2 start:502 end:2 gi|492370606|gb|AGL33705.1| cathepsin L2 [Sinonovacula constricta]	2071.98	2073.35	1	17	VPLSDNFLDQSWQTYMK	0.520515	17
>tr|A0A7E6F497|A0A7E6F497_OCTVU ATP-citrate synthase OS=Octopus vulgaris OX=6645 GN=LOC115216353 PE=3 SV=1	1575.84	1576.81	549	562	HPHADVLVNFASLR	0.520088	14
>tr|Q27Q56|Q27Q56_SEPOF Hemocyanin subunit 2 (Fragment) OS=Sepia officinalis OX=6610 PE=2 SV=1	899.462	900.028	803	809	FAEYTLR	0.520009	7
>Cluster-58773.83035;orf1 len=470 frame:3 start:477 end:1886 gi|554820859|ref|XP_005921157.1| PREDICTED: thymidine phosphorylase-like isoform X1 [Haplochromis burtoni]	2220.07	2221.64	159	179	ILNDVGCCIMSQTIDLAPADK	0.519861	21
>tr|A0A7E6F497|A0A7E6F497_OCTVU ATP-citrate synthase OS=Octopus vulgaris OX=6645 GN=LOC115216353 PE=3 SV=1	1603.72	1604.86	494	507	AVQGMLDFDYVCSR	0.519823	14
>tr|A0A6P7SER3|A0A6P7SER3_OCTVU hemocyanin 1-like OS=Octopus vulgaris OX=6645 GN=LOC115212215 PE=4 SV=2	1887.91	1889.15	1290	1306	YEEIAAFHGLPAQCPNK	0.51975	17
>tr|A0A6P7SDC4|A0A6P7SDC4_OCTVU hemocyanin G-type, units Oda to Odg OS=Octopus vulgaris OX=6645 GN=LOC115211670 PE=4 SV=2	1887.91	1889.15	1309	1325	YEEIAAFHGLPAQCPNK	0.51975	17
>Cluster-58773.162319;orf1 len=2921 frame:3 start:24 end:8786 gi|16596797|gb|AAK28276.2| hemocyanin G-type [Enteroctopus dofleini]	1887.91	1889.15	1313	1329	YEEIAAFHGLPAQCPNK	0.51975	17
>tr|A0A812CBL4|A0A812CBL4_SEPPH HSPA1s OS=Sepia pharaonis OX=158019 GN=SPHA_33061 PE=3 SV=1	1253.62	1254.39	320	329	FEELNADLFR	0.51916	10
>tr|A0A7E6EZ05|A0A7E6EZ05_OCTVU Vinculin OS=Octopus vulgaris OX=6645 GN=LOC115214348 PE=3 SV=1	1073.51	1074.15	703	711	DQVAANNWR	0.51915	9
>tr|A0A6P7STJ4|A0A6P7STJ4_OCTVU Carboxylic ester hydrolase OS=Octopus vulgaris OX=6645 GN=LOC115216415 PE=3 SV=1	809.423	810.009	264	270	EMAAFLK	0.518913	7
>tr|A0A6P7T033|A0A6P7T033_OCTVU T-complex protein 1 subunit gamma OS=Octopus vulgaris OX=6645 GN=LOC115218091 PE=3 SV=1	1327.74	1328.56	297	308	GVSDLAQHFLIK	0.518455	12
>tr|A0A0L8I519|A0A0L8I519_OCTBM Sulfotransfer_1 domain-containing protein OS=Octopus bimaculoides OX=37653 GN=OCBIM_22034539mg PE=4 SV=1	1144.5	1145.35	241	250	SIVDMCSFDK	0.518015	10
>tr|A0A7E6EUU3|A0A7E6EUU3_OCTVU apoptosis-inducing factor 3 isoform X1 OS=Octopus vulgaris OX=6645 GN=LOC115213836 PE=4 SV=1	931.503	932.136	519	527	NAALNMLGK	0.517778	9
>tr|A0A812DGV9|A0A812DGV9_SEPPH AIFM3 OS=Sepia pharaonis OX=158019 GN=SPHA_53448 PE=4 SV=1	2947.41	2949.32	462	488	NDSVVNVQHYQMAHAQGHNAALNMLGK	0.517778	27
>tr|A0A7E6FE51|A0A7E6FE51_OCTVU filamin-A isoform X1 OS=Octopus vulgaris OX=6645 GN=LOC115220251 PE=3 SV=1	1152.6	1153.33	2287	2298	YGGVGIAGSPFK	0.517407	12
>tr|A0A6P7TM22|A0A6P7TM22_OCTVU Tetratricopeptide repeat protein 38 OS=Octopus vulgaris OX=6645 GN=LOC115223987 PE=3 SV=1	1911.88	1913.24	55	70	MFEADPDFIMGHVFQK	0.517243	16
>tr|A0A812DI02|A0A812DI02_SEPPH Tubulin beta chain OS=Sepia pharaonis OX=158019 GN=SPHA_52176 PE=3 SV=1	971.498	972.158	351	359	TAVCDIPPR	0.517225	9
>Cluster-58773.160867;orf1 len=179 frame:2 start:515 end:1051 sp|P42577|FRIS_LYMST Soma ferritin OS=Lymnaea stagnalis PE=2 SV=2 >Cluster-58773.160851;orf1 len=179 frame:-1 start:709 end:173 gi|4768842|gb|AAD29639.1|AF117271_1 ferritin [Enteroctopus dofleini]	1282.64	1283.44	163	174	VGGGLGEYLFDR	0.517217	12
>tr|A0A0L8GJH5|A0A0L8GJH5_OCTBM Pyruvate kinase OS=Octopus bimaculoides OX=37653 GN=OCBIM_22032473mg PE=3 SV=1	977.505	978.099	384	392	GSYPLDAVR	0.517179	9
>tr|A0A0L8HU60|A0A0L8HU60_OCTBM Tetratricopeptide repeat protein 38 OS=Octopus bimaculoides OX=37653 GN=OCBIM_22006847mg PE=3 SV=1	1909.88	1911.18	194	210	DAWATHAMAHVNEMLGR	0.516989	17
>Cluster-58773.94617;orf1 len=371 frame:1 start:124 end:1236 gi|405970764|gb|EKC35640.1| E3 ubiquitin-protein ligase TRAF7 [Crassostrea gigas]	1846.01	1847.13	212	230	GIGAPVGSVLVGTESFISR	0.516983	19
>tr|A0A812CBN1|A0A812CBN1_SEPPH Uncharacterized protein OS=Sepia pharaonis OX=158019 GN=SPHA_33848 PE=4 SV=1	1670.79	1671.92	288	301	YTYDTLFFGGMSIR	0.516671	14
>tr|W6CNR9|W6CNR9_SEPOF Hemocyanin subunit 3 OS=Sepia officinalis OX=6610 PE=2 SV=1	1670.79	1671.92	728	741	YTYDTLFFGGMSIR	0.516671	14
>tr|A0A7E6F1S6|A0A7E6F1S6_OCTVU microtubule-associated protein futsch isoform X4 OS=Octopus vulgaris OX=6645 GN=LOC115215514 PE=4 SV=1	1210.7	1211.45	762	772	DITADLLPKPK	0.516667	11
>Cluster-58773.47482;orf1 len=193 frame:2 start:59 end:637 gi|443711424|gb|ELU05212.1| hypothetical protein CAPTEDRAFT_211623 [Capitella teleta]	915.505	916.074	157	163	WNLVDIR	0.516636	7
>tr|A0A6P7SVM1|A0A6P7SVM1_OCTVU protein-glucosylgalactosylhydroxylysine glucosidase isoform X2 OS=Octopus vulgaris OX=6645 GN=LOC115216968 PE=4 SV=1	1230.53	1231.37	524	533	DDMYLPFDSK	0.516613	10
>tr|A0A7E6FRZ6|A0A7E6FRZ6_OCTVU hemocyanin G-type, units Oda to Odg-like OS=Octopus vulgaris OX=6645 GN=LOC115225590 PE=4 SV=1	1554.77	1555.75	2071	2082	FDSHFHIHHHIK	0.516401	12
>tr|A0A6P7TGG8|A0A6P7TGG8_OCTVU Gamma-cystathionase OS=Octopus vulgaris OX=6645 GN=LOC115223921 PE=3 SV=1	2568.17	2569.73	12	33	SFPHFATNAIHEGQEPDQWNSR	0.516365	22
>tr|A0A6P7STJ4|A0A6P7STJ4_OCTVU Carboxylic ester hydrolase OS=Octopus vulgaris OX=6645 GN=LOC115216415 PE=3 SV=1	1450.73	1451.63	168	180	VGPFGFLSLNDER	0.516229	13
>tr|A0A7E6ETN4|A0A7E6ETN4_OCTVU protein-glutamine gamma-glutamyltransferase K OS=Octopus vulgaris OX=6645 GN=LOC115211974 PE=3 SV=1	1025.58	1026.23	137	145	GFSFTVVIR	0.51606	9
>tr|A0A7E6EW98|A0A7E6EW98_OCTVU 10-formyltetrahydrofolate dehydrogenase OS=Octopus vulgaris OX=6645 GN=LOC115216749 PE=3 SV=1	1194.52	1195.24	468	477	EAFENGEWGR	0.515959	10
>Cluster-58773.168901;orf1 len=432 frame:1 start:457 end:1752 gi|762151209|ref|XP_011413584.1| PREDICTED: aspartate aminotransferase, mitochondrial-like, partial [Crassostrea gigas] >Cluster-58773.168923;orf1 len=432 frame:2 start:548 end:1843 gi|762151209|ref|XP_011413584.1| PREDICTED: aspartate aminotransferase, mitochondrial-like, partial [Crassostrea gigas]	1473.77	1474.67	70	82	DDNGKPYILPSVR	0.515698	13
>tr|A0A0L8GW99|A0A0L8GW99_OCTBM Uncharacterized protein OS=Octopus bimaculoides OX=37653 GN=OCBIM_22026800mg PE=3 SV=1	1654.84	1655.86	203	218	GISAFIVPTSSEGFSR	0.515673	16
>tr|A0A812EMG1|A0A812EMG1_SEPPH DNAH OS=Sepia pharaonis OX=158019 GN=SPHA_78697 PE=4 SV=1	965.614	966.219	492	500	GLLIPSPIR	0.515521	9
>tr|W6CNR9|W6CNR9_SEPOF Hemocyanin subunit 3 OS=Sepia officinalis OX=6610 PE=2 SV=1	1151.58	1152.3	566	574	ETKPNPFYR	0.515259	9
>tr|A0A6P7S644|A0A6P7S644_OCTVU Proteasome subunit beta OS=Octopus vulgaris OX=6645 GN=LOC115209401 PE=3 SV=1	1327.65	1328.6	189	200	FTANCISLAMTR	0.514859	12
>tr|A0A6P7TMW4|A0A6P7TMW4_OCTVU heat shock protein HSP 90-alpha isoform X2 OS=Octopus vulgaris OX=6645 GN=LOC115224220 PE=3 SV=1	2316.13	2317.75	349	367	VFIMDNCEDLIPEYLNFIK	0.514856	19
>tr|A0A7E6FDU1|A0A7E6FDU1_OCTVU Glucose-6-phosphate 1-dehydrogenase OS=Octopus vulgaris OX=6645 GN=LOC115220357 PE=3 SV=1	1340.63	1341.47	501	511	SFNFVYSGTYR	0.514772	11
>tr|A0A0L8HJ80|A0A0L8HJ80_OCTBM Major vault protein OS=Octopus bimaculoides OX=37653 GN=OCBIM_22013292mg PE=4 SV=1	1595.85	1597.07	55	68	IVMPPVNMMTIPPR	0.514647	14
>tr|A0A812CYT6|A0A812CYT6_SEPPH MYH OS=Sepia pharaonis OX=158019 GN=SPHA_42230 PE=3 SV=1	2194.25	2195.7	359	378	VCHLLGLNVTALTQAFLRPK	0.514423	20
>tr|A0A7E6EZI8|A0A7E6EZI8_OCTVU uncharacterized protein LOC115214248 OS=Octopus vulgaris OX=6645 GN=LOC115214248 PE=4 SV=1	1652.75	1653.97	390	402	WLCTYVFYCETPK	0.514349	13
>tr|A0A7E6FG45|A0A7E6FG45_OCTVU filamin-A isoform X3 OS=Octopus vulgaris OX=6645 GN=LOC115220426 PE=3 SV=1	983.487	984.166	183	191	GSVETCFLK	0.514132	9
>tr|A0A7E6EXQ9|A0A7E6EXQ9_OCTVU cytosolic non-specific dipeptidase isoform X2 OS=Octopus vulgaris OX=6645 GN=LOC115213823 PE=3 SV=1	1238.68	1239.47	418	428	LFAAYINELGK	0.514129	11
>tr|A0A812EMG1|A0A812EMG1_SEPPH DNAH OS=Sepia pharaonis OX=158019 GN=SPHA_78697 PE=4 SV=1	1672.68	1673.83	412	427	SCGDGPSLATMFEDDK	0.514045	16
>tr|W6CNR9|W6CNR9_SEPOF Hemocyanin subunit 3 OS=Sepia officinalis OX=6610 PE=2 SV=1	889.456	890.055	875	881	XEMNNLR	0.51385	7
>tr|A0A812CBN1|A0A812CBN1_SEPPH Uncharacterized protein OS=Sepia pharaonis OX=158019 GN=SPHA_33848 PE=4 SV=1	1213.57	1214.33	2168	2177	LDAYDNFDIK	0.513574	10
>tr|A0A7E6FE51|A0A7E6FE51_OCTVU filamin-A isoform X1 OS=Octopus vulgaris OX=6645 GN=LOC115220251 PE=3 SV=1	1088.61	1089.29	1938	1946	IPENYLAIR	0.51342	9
>tr|A0A6P7SP92|A0A6P7SP92_OCTVU Carbonyl reductase (NADPH) OS=Octopus vulgaris OX=6645 GN=LOC115215080 PE=3 SV=1	1152.57	1153.29	185	195	GWPSTAYGVSK	0.513161	11
>tr|A0A6P7SI10|A0A6P7SI10_OCTVU CD109 antigen isoform X2 OS=Octopus vulgaris OX=6645 GN=LOC115213260 PE=4 SV=1	822.363	822.855	399	405	FSDNDPK	0.513157	7
>Cluster-58773.127031;orf1 len=154 frame:-3 start:549 end:88 gi|405978782|gb|EKC43144.1| Nucleoside diphosphate kinase B [Crassostrea gigas]	1979.97	1981.23	138	153	EEQITWKPALSSWLYE	0.512883	16
>tr|A0A6P7SUN7|A0A6P7SUN7_OCTVU hydroxyacylglutathione hydrolase, mitochondrial isoform X1 OS=Octopus vulgaris OX=6645 GN=LOC115216426 PE=3 SV=2	1650.85	1651.94	54	67	FHSHPLTVSRPNMK	0.512515	14
>tr|A0A6P7T7L0|A0A6P7T7L0_OCTVU heat shock cognate 71 kDa protein OS=Octopus vulgaris OX=6645 GN=LOC115220772 PE=3 SV=1	1273.59	1274.45	540	550	NGLESYAFNMK	0.512497	11
>tr|A0A6P7SGA6|A0A6P7SGA6_OCTVU Clathrin heavy chain OS=Octopus vulgaris OX=6645 GN=LOC115212844 PE=3 SV=1	1389.77	1390.63	470	482	AADPTLALSVYLR	0.512444	13
>Cluster-58773.104902;orf1 len=592 frame:3 start:618 end:2393 gi|524870221|ref|XP_005091896.1| PREDICTED: xaa-Pro dipeptidase-like [Aplysia californica]	1119.58	1120.26	249	259	STPAAFNGINK	0.512329	11
>Cluster-58773.109972;orf1 len=856 frame:2 start:89 end:2656 gi|762142591|ref|XP_011454520.1| PREDICTED: inter-alpha-trypsin inhibitor heavy chain H3-like [Crassostrea gigas]	886.456	887.055	13	20	IANNMAPR	0.512143	8
>tr|A0A7E6F1S6|A0A7E6F1S6_OCTVU microtubule-associated protein futsch isoform X4 OS=Octopus vulgaris OX=6645 GN=LOC115215514 PE=4 SV=1	2288.1	2289.48	40	60	TWDVEAAGVDINEEVSQIANK	0.512082	21
>Cluster-58773.89511;orf1 len=572 frame:2 start:377 end:2092 gi|524875173|ref|XP_005094317.1| PREDICTED: alpha-aminoadipic semialdehyde dehydrogenase-like [Aplysia californica]	1252.61	1253.43	349	361	SALFACAGTAGQR	0.512071	13
>tr|A0A812CP82|A0A812CP82_SEPPH Aldehyde dehydrogenase (NAD(+)) OS=Sepia pharaonis OX=158019 GN=SPHA_37438 PE=3 SV=1	1252.61	1253.43	338	350	SALFACAGTAGQR	0.512071	13
>tr|A0A7E6FE51|A0A7E6FE51_OCTVU filamin-A isoform X1 OS=Octopus vulgaris OX=6645 GN=LOC115220251 PE=3 SV=1	862.442	862.966	1147	1154	AYGPGLER	0.51193	8
>tr|A0A7E6ETN4|A0A7E6ETN4_OCTVU protein-glutamine gamma-glutamyltransferase K OS=Octopus vulgaris OX=6645 GN=LOC115211974 PE=3 SV=1	987.526	988.138	185	193	DGQWAAVLK	0.511873	9
>tr|A0A0L8H1Z7|A0A0L8H1Z7_OCTBM CN hydrolase domain-containing protein OS=Octopus bimaculoides OX=37653 GN=OCBIM_22024094mg PE=4 SV=1	2724.4	2726.1	169	194	DEVHGDILANTCVIISNSGNIIGITR	0.511802	26
>tr|A0A0L8GJH5|A0A0L8GJH5_OCTBM Pyruvate kinase OS=Octopus bimaculoides OX=37653 GN=OCBIM_22032473mg PE=3 SV=1	1168.71	1169.46	522	532	GVPLVIVTGWK	0.511779	11
>tr|A0A6P7T4Z8|A0A6P7T4Z8_OCTVU opine dehydrogenase OS=Octopus vulgaris OX=6645 GN=LOC115219799 PE=4 SV=1	1129.58	1130.36	308	317	AYNGLVHPMK	0.511778	10
>tr|A0A6P7TDN6|A0A6P7TDN6_OCTVU 4a-hydroxytetrahydrobiopterin dehydratase OS=Octopus vulgaris OX=6645 GN=LOC115221645 PE=3 SV=1	1716.76	1717.91	104	116	MDHHPEWFNVYNK	0.511601	13
>tr|A0A7E6F2W5|A0A7E6F2W5_OCTVU Calreticulin OS=Octopus vulgaris OX=6645 GN=LOC115215618 PE=3 SV=1	1833.85	1834.99	192	207	VESGDLESDWDFLPPK	0.511406	16
>Cluster-58773.74875;orf1 len=741 frame:2 start:1832 end:4054 gi|159006|gb|AAA16244.1| peroxidase-like protein, partial [Euprymna scolopes]	1380.73	1381.65	281	294	ALATPPLNCQPGAK	0.511364	14
>tr|A0A7E6FFI6|A0A7E6FFI6_OCTVU chorion peroxidase-like OS=Octopus vulgaris OX=6645 GN=LOC115221248 PE=4 SV=1	1380.73	1381.65	153	166	ALATPPLNCQPGAK	0.511364	14
>tr|A0A812DEV9|A0A812DEV9_SEPPH Rab GDP dissociation inhibitor OS=Sepia pharaonis OX=158019 GN=SPHA_54563 PE=3 SV=1	1843.86	1845.12	329	345	NDIYVCCVSHAHNVAAK	0.510999	17
>tr|F0V3W2|F0V3W2_LEPCI Hemocyanin (Fragment) OS=Lepidochitona cinerea OX=256056 PE=2 SV=1	952.5	953.095	130	137	HNPWLSAK	0.510853	8
>tr|A0A7E6ENX1|A0A7E6ENX1_OCTVU spectrin alpha chain isoform X2 OS=Octopus vulgaris OX=6645 GN=LOC115227715 PE=3 SV=1	1540.78	1541.82	1416	1427	LDQCLELQLFYR	0.510789	12
>tr|A0A6P7S9Z4|A0A6P7S9Z4_OCTVU Calmodulin OS=Octopus vulgaris OX=6645 GN=LOC115210643 PE=3 SV=1 >tr|A0A0L8I9I4|A0A0L8I9I4_OCTBM Calmodulin OS=Octopus bimaculoides OX=37653 GN=OCBIM_22028792mg PE=3 SV=1	1249.62	1250.36	96	107	DGNGFISAAELR	0.510787	12
>tr|A0A6P7TKE4|A0A6P7TKE4_OCTVU probable aminopeptidase NPEPL1 isoform X1 OS=Octopus vulgaris OX=6645 GN=LOC115223934 PE=3 SV=1	1238.64	1239.49	289	300	GIVYDTGGLCIK	0.510151	12
>tr|A0A6P7SRT8|A0A6P7SRT8_OCTVU ATP synthase subunit beta OS=Octopus vulgaris OX=6645 GN=LOC115215584 PE=3 SV=1	966.573	967.163	129	138	IPVGPGTLGR	0.51007	10
>tr|A0A6P7SH66|A0A6P7SH66_OCTVU alpha-actinin, sarcomeric isoform X3 OS=Octopus vulgaris OX=6645 GN=LOC115212896 PE=4 SV=1	1506.76	1507.7	256	267	GFEEWLLSELQR	0.509873	12
>tr|A0A6P7U2G4|A0A6P7U2G4_OCTVU uncharacterized protein LOC115232424 OS=Octopus vulgaris OX=6645 GN=LOC115232424 PE=4 SV=1	1030.52	1031.22	289	297	AENLPLDMK	0.509863	9
>tr|A0A812CBN1|A0A812CBN1_SEPPH Uncharacterized protein OS=Sepia pharaonis OX=158019 GN=SPHA_33848 PE=4 SV=1	1471.67	1472.69	652	664	SYNSANCAIEMLR	0.509849	13
>tr|W6CNR9|W6CNR9_SEPOF Hemocyanin subunit 3 OS=Sepia officinalis OX=6610 PE=2 SV=1	1471.67	1472.69	1092	1104	SYNSANCAIEMLR	0.509849	13
>tr|A0A812CD65|A0A812CD65_SEPPH Uncharacterized protein OS=Sepia pharaonis OX=158019 GN=SPHA_33819 PE=4 SV=1	1471.67	1472.69	1094	1106	SYNSANCAIEMLR	0.509849	13
>tr|A0A6P7TMW4|A0A6P7TMW4_OCTVU heat shock protein HSP 90-alpha isoform X2 OS=Octopus vulgaris OX=6645 GN=LOC115224220 PE=3 SV=1	1189.64	1190.4	201	210	HSQFIGYPIK	0.509615	10
>tr|W6CNR9|W6CNR9_SEPOF Hemocyanin subunit 3 OS=Sepia officinalis OX=6610 PE=2 SV=1	1145.51	1146.21	2551	2560	SDESTFGFQK	0.509469	10
>Cluster-58773.6509;orf1 len=104 frame:2 start:2 end:313 sp|P11221|OPRI_PSEAE Major outer membrane lipoprotein OS=Pseudomonas aeruginosa (strain ATCC 15692 / DSM 22644 / CIP 104116 / JCM 14847 / LMG 12228 / 1C / PRS 101 / PAO1) GN=oprI PE=3 SV=1	1795.96	1797.14	27	45	FSALALAAVLATGCSSVSK	0.509182	19
>tr|A0A0S1U346|A0A0S1U346_AMPFA Triosephosphate isomerase OS=Amphioctopus fangsiao OX=515817 PE=2 SV=1 >tr|A0A6P7SZ67|A0A6P7SZ67_OCTVU Triosephosphate isomerase OS=Octopus vulgaris OX=6645 GN=LOC115218066 PE=3 SV=1	1590.82	1591.88	68	83	VPSGAFTGDISPAMIK	0.509157	16
>tr|A0A7E6EZ05|A0A7E6EZ05_OCTVU Vinculin OS=Octopus vulgaris OX=6645 GN=LOC115214348 PE=3 SV=1	997.477	998.153	71	79	QDMPPALSR	0.509064	9
>tr|A0A812CD65|A0A812CD65_SEPPH Uncharacterized protein OS=Sepia pharaonis OX=158019 GN=SPHA_33819 PE=4 SV=1	2563.17	2565.1	1332	1352	YGIMIYTCCLHGMPTFPHWHR	0.508743	21
>tr|A0A7E6EZI8|A0A7E6EZI8_OCTVU uncharacterized protein LOC115214248 OS=Octopus vulgaris OX=6645 GN=LOC115214248 PE=4 SV=1	1927.88	1929.09	5961	5978	AISQCEDAGHPELSSDLR	0.508567	18
>tr|A0A6P7TGU1|A0A6P7TGU1_OCTVU actin-interacting protein 1 isoform X1 OS=Octopus vulgaris OX=6645 GN=LOC115223147 PE=4 SV=1	1045.49	1046.13	107	115	DIAWSPDNK	0.507744	9
>tr|A0A7E6EUU3|A0A7E6EUU3_OCTVU apoptosis-inducing factor 3 isoform X1 OS=Octopus vulgaris OX=6645 GN=LOC115213836 PE=4 SV=1	1249.59	1250.42	252	261	EECIPYDRPK	0.507699	10
>tr|A0A6P7SYF5|A0A6P7SYF5_OCTVU retinal dehydrogenase 2 OS=Octopus vulgaris OX=6645 GN=LOC115217865 PE=3 SV=1	2378.1	2379.69	34	54	TFLTLNPCHGETICEIQESDK	0.507406	21
>tr|A0A7E6FD92|A0A7E6FD92_OCTVU insulin-degrading enzyme OS=Octopus vulgaris OX=6645 GN=LOC115219912 PE=3 SV=1	1060.48	1061.11	154	161	NIQDDNWR	0.507329	8
>tr|A0A0L8G8E4|A0A0L8G8E4_OCTBM TGc domain-containing protein OS=Octopus bimaculoides OX=37653 GN=OCBIM_22038334mg PE=3 SV=1	2986.34	2988.2	377	403	RPDLPSGYDGWQAHDATPQESSDGLMR	0.507256	27
>tr|A0A7E6EY74|A0A7E6EY74_OCTVU twitchin OS=Octopus vulgaris OX=6645 GN=LOC115213975 PE=3 SV=1	2293.13	2294.65	3662	3681	SVTFECSVHGTPKPEITWFK	0.506952	20
>tr|A0A6P7SQT5|A0A6P7SQT5_OCTVU cathepsin L1-like OS=Octopus vulgaris OX=6645 GN=LOC115215560 PE=3 SV=1	2463.11	2464.75	136	158	NQAQCGSCWAFSTTGSLEGQIFK	0.506769	23
>Cluster-58773.132040;orf1 len=167 frame:-2 start:502 end:2 gi|492370606|gb|AGL33705.1| cathepsin L2 [Sinonovacula constricta]	2463.11	2464.75	118	140	NQAQCGSCWAFSTTGSLEGQIFK	0.506769	23
>tr|A0A7E6FRZ6|A0A7E6FRZ6_OCTVU hemocyanin G-type, units Oda to Odg-like OS=Octopus vulgaris OX=6645 GN=LOC115225590 PE=4 SV=1	835.42	835.938	1378	1384	SFDELPK	0.506646	7
>tr|Q06268|Q06268_ENTDO Omega-crystallin OS=Enteroctopus dofleini OX=267067 PE=2 SV=1	906.399	906.996	258	265	DSSVPDMR	0.506601	8
>Cluster-58773.104902;orf1 len=592 frame:3 start:618 end:2393 gi|524870221|ref|XP_005091896.1| PREDICTED: xaa-Pro dipeptidase-like [Aplysia californica]	2899.34	2901.23	329	356	HLSYTCICGSGENAAILHYGHAGAPNSR	0.50653	28
>tr|A0A6P7U0P7|A0A6P7U0P7_OCTVU zinc finger ZZ-type and EF-hand domain-containing protein 1 OS=Octopus vulgaris OX=6645 GN=LOC115228010 PE=4 SV=1	1937.83	1939.31	1620	1635	FSMLLEMQFECNSCQK	0.506522	16
>tr|A0A0L8G5K6|A0A0L8G5K6_OCTBM Uncharacterized protein OS=Octopus bimaculoides OX=37653 GN=OCBIM_22000375mg PE=4 SV=1	1146.57	1147.24	544	554	GNYGNNLPAAR	0.506313	11
>tr|A0A7E6EZI8|A0A7E6EZI8_OCTVU uncharacterized protein LOC115214248 OS=Octopus vulgaris OX=6645 GN=LOC115214248 PE=4 SV=1	2123.06	2124.44	1333	1352	DMFYVLGGGVGGIETPQNLR	0.506165	20
>tr|A0A6P7T914|A0A6P7T914_OCTVU thyroglobulin isoform X2 OS=Octopus vulgaris OX=6645 GN=LOC115220711 PE=4 SV=1	1361.73	1362.71	114	125	TCIKPLNCTQLK	0.506154	12
>Cluster-58773.132244;orf1 len=954 frame:2 start:176 end:3037 gi|159006|gb|AAA16244.1| peroxidase-like protein, partial [Euprymna scolopes]	1619.83	1620.82	662	677	NGFGAAGIIYSHSGIR	0.506085	16
>tr|A0A0L8FXZ4|A0A0L8FXZ4_OCTBM Uncharacterized protein OS=Octopus bimaculoides OX=37653 GN=OCBIM_22004572mg PE=4 SV=1	1619.83	1620.82	404	419	NGFGAAGIIYSHSGIR	0.506085	16
>tr|A0A6P7U0P7|A0A6P7U0P7_OCTVU zinc finger ZZ-type and EF-hand domain-containing protein 1 OS=Octopus vulgaris OX=6645 GN=LOC115228010 PE=4 SV=1	1294.7	1295.53	977	987	VEEAFQFLLAK	0.50603	11
>tr|A0A7E6FR50|A0A7E6FR50_OCTVU NADH-cytochrome b5 reductase OS=Octopus vulgaris OX=6645 GN=LOC115224390 PE=3 SV=1	2167.09	2168.43	128	147	GPSGLLTYHGNGEFHIKPDK	0.50592	20
>tr|A0A6P7STJ4|A0A6P7STJ4_OCTVU Carboxylic ester hydrolase OS=Octopus vulgaris OX=6645 GN=LOC115216415 PE=3 SV=1	1109.7	1110.43	6	14	YIFIISLLK	0.505589	9
>tr|Q9BJ58|Q9BJ58_ENTDO Hemocyanin G-type (Fragment) OS=Enteroctopus dofleini OX=267067 PE=4 SV=2	1678.79	1679.97	1927	1941	GLNAYESHCALELMK	0.505497	15
>sp|O61363|HCYG_ENTDO Hemocyanin G-type, units Oda to Odg OS=Enteroctopus dofleini OX=267067 GN=ODHCY PE=1 SV=1	1678.79	1679.97	1898	1912	GLNAYESHCALELMK	0.505497	15
>tr|Q27Q56|Q27Q56_SEPOF Hemocyanin subunit 2 (Fragment) OS=Sepia officinalis OX=6610 PE=2 SV=1	1662.86	1663.95	1074	1088	GKPYNTANCAIELLR	0.505451	15
>tr|A0A7E6F650|A0A7E6F650_OCTVU Ribokinase OS=Octopus vulgaris OX=6645 GN=LOC115217290 PE=3 SV=1	3322.53	3324.84	1	31	MDVVVVGSFMTDFFCYCPEFPKPGETVHGSK	0.505376	31
>tr|A0A6P7SI10|A0A6P7SI10_OCTVU CD109 antigen isoform X2 OS=Octopus vulgaris OX=6645 GN=LOC115213260 PE=4 SV=1	1879.93	1881.11	193	208	SFQLSDKPTTGTWHFK	0.505325	16
>tr|A0A6P7SJH5|A0A6P7SJH5_OCTVU cytosolic non-specific dipeptidase OS=Octopus vulgaris OX=6645 GN=LOC115213824 PE=3 SV=1	1494.83	1495.77	74	87	LPPVIFGQLGNDPK	0.505293	14
>tr|A0A7E6EXQ9|A0A7E6EXQ9_OCTVU cytosolic non-specific dipeptidase isoform X2 OS=Octopus vulgaris OX=6645 GN=LOC115213823 PE=3 SV=1	1494.83	1495.77	34	47	LPPVIFGQLGNDPK	0.505293	14
>tr|A0A7E6EY74|A0A7E6EY74_OCTVU twitchin OS=Octopus vulgaris OX=6645 GN=LOC115213975 PE=3 SV=1	1361.79	1362.73	375	386	GPNMYIIVLTIK	0.505201	12
>tr|A0A7E6EZ05|A0A7E6EZ05_OCTVU Vinculin OS=Octopus vulgaris OX=6645 GN=LOC115214348 PE=3 SV=1	1911.91	1913.06	277	295	QASDWLQDPAALVGSAGDK	0.504832	19
>tr|A0A7E6EZI8|A0A7E6EZI8_OCTVU uncharacterized protein LOC115214248 OS=Octopus vulgaris OX=6645 GN=LOC115214248 PE=4 SV=1	1192.59	1193.37	1565	1576	ESLDILCGGTGK	0.504683	12
>tr|A0A7E6EUU3|A0A7E6EUU3_OCTVU apoptosis-inducing factor 3 isoform X1 OS=Octopus vulgaris OX=6645 GN=LOC115213836 PE=4 SV=1	926.473	927.054	129	137	NGVFAFGSK	0.504324	9
>tr|A0A7E6EUU3|A0A7E6EUU3_OCTVU apoptosis-inducing factor 3 isoform X1 OS=Octopus vulgaris OX=6645 GN=LOC115213836 PE=4 SV=1	1891.91	1893.07	168	184	TGDIEDFPGLDSLHTFK	0.504159	17
>Cluster-58773.110379;orf1 len=257 frame:1 start:346 end:1116 gi|347972707|ref|XP_320580.4| AGAP011952-PA [Anopheles gambiae str. PEST]>gi|333469693|gb|EAA00684.4| AGAP011952-PA [Anopheles gambiae str. PEST]	3144.37	3146.56	91	116	FDEDFDYPEIDCFVCAILSYMLPENR	0.504015	26
>tr|A0A7E6EZI8|A0A7E6EZI8_OCTVU uncharacterized protein LOC115214248 OS=Octopus vulgaris OX=6645 GN=LOC115214248 PE=4 SV=1	1117.55	1118.2	6272	6282	DLLDSLDGGGR	0.503952	11
>Cluster-58773.109972;orf1 len=856 frame:2 start:89 end:2656 gi|762142591|ref|XP_011454520.1| PREDICTED: inter-alpha-trypsin inhibitor heavy chain H3-like [Crassostrea gigas]	2058.19	2059.52	714	731	ILLLANFQANLFVHAFVK	0.503947	18
>Cluster-58773.197059;orf1 len=509 frame:1 start:352 end:1878 gi|260816652|ref|XP_002603202.1| hypothetical protein BRAFLDRAFT_281736 [Branchiostoma floridae]>gi|229288519|gb|EEN59213.1| hypothetical protein BRAFLDRAFT_281736 [Branchiostoma floridae]	1031.56	1032.19	71	79	AISTFLSHR	0.503767	9
>tr|A0A6P7TMY2|A0A6P7TMY2_OCTVU Fumarylacetoacetase OS=Octopus vulgaris OX=6645 GN=LOC115226547 PE=3 SV=2	1031.56	1032.19	4	12	AISTFLSHR	0.503767	9
>tr|A0A0L8I420|A0A0L8I420_OCTBM Uncharacterized protein (Fragment) OS=Octopus bimaculoides OX=37653 GN=OCBIM_22037121mg PE=3 SV=1	1102.62	1103.28	90	99	GINGVHPRPR	0.503603	10
>tr|A0A6P7SUD6|A0A6P7SUD6_OCTVU 6-phosphogluconolactonase OS=Octopus vulgaris OX=6645 GN=LOC115216558 PE=3 SV=2	811.438	812.025	1	7	MLFGSLK	0.503571	7
>tr|A0A812BGH7|A0A812BGH7_SEPPH Proteasome subunit alpha type OS=Sepia pharaonis OX=158019 GN=SPHA_15160 PE=3 SV=1	998.458	999.074	119	127	QSYTQFGGK	0.503449	9
>tr|A0A6P7TPR7|A0A6P7TPR7_OCTVU uncharacterized protein LOC115224696 OS=Octopus vulgaris OX=6645 GN=LOC115224696 PE=4 SV=2	953.421	953.987	164	171	SDINDDFK	0.503426	8
>tr|A0A6P7SVM1|A0A6P7SVM1_OCTVU protein-glucosylgalactosylhydroxylysine glucosidase isoform X2 OS=Octopus vulgaris OX=6645 GN=LOC115216968 PE=4 SV=1	2356.22	2357.75	683	705	GGSFTLSFNAAIMSITLTKPGDK	0.502914	23
>tr|A0A6P7TG43|A0A6P7TG43_OCTVU GDP-4-keto-6-deoxy-D-mannose-3,5-epimerase-4-reductase OS=Octopus vulgaris OX=6645 GN=LOC115222310 PE=3 SV=1	1477.73	1478.65	32	43	EPNEQWIFLSSK	0.502542	12
>tr|A0A6P7SRT8|A0A6P7SRT8_OCTVU ATP synthase subunit beta OS=Octopus vulgaris OX=6645 GN=LOC115215584 PE=3 SV=1	1922.95	1924.13	290	305	DEEGQDVLLFIDNIFR	0.502379	16
>tr|A0A0L8G0N4|A0A0L8G0N4_OCTBM Prolyl endopeptidase OS=Octopus bimaculoides OX=37653 GN=OCBIM_22003476mg PE=3 SV=1	999.537	1000.15	638	645	YSPLHNIR	0.50226	8
>tr|A0A6P7T7W6|A0A6P7T7W6_OCTVU Aspartyl aminopeptidase OS=Octopus vulgaris OX=6645 GN=LOC115220844 PE=3 SV=1	1721.83	1723.04	430	445	EQCCTTSIAHGIALFK	0.502132	16
>tr|A0A6P7SAW7|A0A6P7SAW7_OCTVU transketolase OS=Octopus vulgaris OX=6645 GN=LOC115210747 PE=4 SV=1	2047.06	2048.32	251	268	NIPGVEDLENWHGKPLTK	0.501978	18
>Cluster-58773.109971;orf1 len=194 frame:2 start:2 end:583 gi|762113409|ref|XP_011439462.1| PREDICTED: inter-alpha-trypsin inhibitor heavy chain H3-like [Crassostrea gigas]	3973.83	3976.25	54	89	EELFEEEEDVSPSSRPHGAYLHGLPPSGGPQGSYYR	0.501744	36
>tr|A0A6P7TD81|A0A6P7TD81_OCTVU dipeptidyl peptidase 2 isoform X1 OS=Octopus vulgaris OX=6645 GN=LOC115222860 PE=3 SV=1	1476.68	1477.63	207	218	FDHSFFFTDVSK	0.501725	12
>tr|A0A0L8GKZ1|A0A0L8GKZ1_OCTBM Helicase C-terminal domain-containing protein OS=Octopus bimaculoides OX=37653 GN=OCBIM_22031992mg PE=4 SV=1	2329.26	2330.76	476	497	EIVSLIIDALDGGISCIVEELK	0.501342	22
>tr|A0A7E6EY74|A0A7E6EY74_OCTVU twitchin OS=Octopus vulgaris OX=6645 GN=LOC115213975 PE=3 SV=1	858.352	859.08	4794	4801	TSCCCTLK	0.501268	8
>tr|A0A7E6EY74|A0A7E6EY74_OCTVU twitchin OS=Octopus vulgaris OX=6645 GN=LOC115213975 PE=3 SV=1	1320.7	1321.49	3828	3838	IQINDRPDPPR	0.501152	11
>tr|A0A7E6ETN4|A0A7E6ETN4_OCTVU protein-glutamine gamma-glutamyltransferase K OS=Octopus vulgaris OX=6645 GN=LOC115211974 PE=3 SV=1	926.44	927.073	41	48	DCFSLVSR	0.501031	8
>tr|A0A6P7SER3|A0A6P7SER3_OCTVU hemocyanin 1-like OS=Octopus vulgaris OX=6645 GN=LOC115212215 PE=4 SV=2	1242.7	1243.5	1055	1064	VWAIWQALQK	0.500964	10
>tr|A0A6P7SDC4|A0A6P7SDC4_OCTVU hemocyanin G-type, units Oda to Odg OS=Octopus vulgaris OX=6645 GN=LOC115211670 PE=4 SV=2	1242.7	1243.5	1074	1083	VWAIWQALQK	0.500964	10
>Cluster-58773.162319;orf1 len=2921 frame:3 start:24 end:8786 gi|16596797|gb|AAK28276.2| hemocyanin G-type [Enteroctopus dofleini]	1242.7	1243.5	1078	1087	VWAIWQALQK	0.500964	10
>tr|A0A6P7TV68|A0A6P7TV68_OCTVU 26S proteasome non-ATPase regulatory subunit 6 OS=Octopus vulgaris OX=6645 GN=LOC115229467 PE=3 SV=1	1125.68	1126.4	139	147	LDLVFHLIR	0.500955	9
>Cluster-58773.130155;orf1 len=534 frame:1 start:1 end:1602 gi|871256270|ref|XP_012942267.1| PREDICTED: mucin-3A-like [Aplysia californica]	2869.44	2871.22	301	326	TLSTPLGTPSNVEEDMLNNIQQAQLR	0.500875	26
>tr|A0A7E6ENX1|A0A7E6ENX1_OCTVU spectrin alpha chain isoform X2 OS=Octopus vulgaris OX=6645 GN=LOC115227715 PE=3 SV=1	2345.06	2346.59	1652	1671	DIDFWLGEVEQMLASEDYGK	0.500391	20
>tr|A0A6P7SER3|A0A6P7SER3_OCTVU hemocyanin 1-like OS=Octopus vulgaris OX=6645 GN=LOC115212215 PE=4 SV=2	898.442	899	1659	1666	QGHLADFK	0.500382	8
>tr|A0A6P7SDC4|A0A6P7SDC4_OCTVU hemocyanin G-type, units Oda to Odg OS=Octopus vulgaris OX=6645 GN=LOC115211670 PE=4 SV=2	898.442	899	1678	1685	QGHLADFK	0.500382	8
>Cluster-58773.162319;orf1 len=2921 frame:3 start:24 end:8786 gi|16596797|gb|AAK28276.2| hemocyanin G-type [Enteroctopus dofleini]	915.468	916.03	1682	1689	QGHLADFK	0.500382	8
>tr|A0A6P7SER3|A0A6P7SER3_OCTVU hemocyanin 1-like OS=Octopus vulgaris OX=6645 GN=LOC115212215 PE=4 SV=2	811.325	811.851	4205	4211	DMTTDGR		7
>tr|A0A6P7SER3|A0A6P7SER3_OCTVU hemocyanin 1-like OS=Octopus vulgaris OX=6645 GN=LOC115212215 PE=4 SV=2	859.5	860.007	1	8	SISGNLIR		8
>tr|A0A6P7SER3|A0A6P7SER3_OCTVU hemocyanin 1-like OS=Octopus vulgaris OX=6645 GN=LOC115212215 PE=4 SV=2	862.503	863.051	570	576	LFEKPTK		7
>tr|A0A6P7SER3|A0A6P7SER3_OCTVU hemocyanin 1-like OS=Octopus vulgaris OX=6645 GN=LOC115212215 PE=4 SV=2	862.503	863.051	3492	3498	LFEKPTK		7
>tr|A0A6P7SER3|A0A6P7SER3_OCTVU hemocyanin 1-like OS=Octopus vulgaris OX=6645 GN=LOC115212215 PE=4 SV=2	870.468	870.987	2401	2408	TSADVHLK		8
>tr|A0A6P7SER3|A0A6P7SER3_OCTVU hemocyanin 1-like OS=Octopus vulgaris OX=6645 GN=LOC115212215 PE=4 SV=2	870.468	870.987	5323	5330	TSADVHLK		8
>tr|A0A6P7SER3|A0A6P7SER3_OCTVU hemocyanin 1-like OS=Octopus vulgaris OX=6645 GN=LOC115212215 PE=4 SV=2	901.51	902.044	1	8	SISGNLIR		8
>tr|A0A6P7SER3|A0A6P7SER3_OCTVU hemocyanin 1-like OS=Octopus vulgaris OX=6645 GN=LOC115212215 PE=4 SV=2	913.547	914.099	2502	2510	IAAEGAIIR		9
>tr|A0A6P7SER3|A0A6P7SER3_OCTVU hemocyanin 1-like OS=Octopus vulgaris OX=6645 GN=LOC115212215 PE=4 SV=2	913.547	914.099	5424	5432	IAAEGAIIR		9
>tr|A0A6P7SER3|A0A6P7SER3_OCTVU hemocyanin 1-like OS=Octopus vulgaris OX=6645 GN=LOC115212215 PE=4 SV=2	926.433	926.967	2792	2798	EIQHEDR		7
>tr|A0A6P7SER3|A0A6P7SER3_OCTVU hemocyanin 1-like OS=Octopus vulgaris OX=6645 GN=LOC115212215 PE=4 SV=2	926.433	926.967	5714	5720	EIQHEDR		7
>tr|A0A6P7SER3|A0A6P7SER3_OCTVU hemocyanin 1-like OS=Octopus vulgaris OX=6645 GN=LOC115212215 PE=4 SV=2	926.469	927.011	1166	1174	AHGATDQVK		9
>tr|A0A6P7SER3|A0A6P7SER3_OCTVU hemocyanin 1-like OS=Octopus vulgaris OX=6645 GN=LOC115212215 PE=4 SV=2	926.469	927.011	4088	4096	AHGATDQVK		9
>tr|A0A6P7SER3|A0A6P7SER3_OCTVU hemocyanin 1-like OS=Octopus vulgaris OX=6645 GN=LOC115212215 PE=4 SV=2	926.483	927.048	5772	5779	YDITSSLK		8
>tr|A0A6P7SER3|A0A6P7SER3_OCTVU hemocyanin 1-like OS=Octopus vulgaris OX=6645 GN=LOC115212215 PE=4 SV=2	931.449	931.992	298	304	EHQQHPR		7
>tr|A0A6P7SER3|A0A6P7SER3_OCTVU hemocyanin 1-like OS=Octopus vulgaris OX=6645 GN=LOC115212215 PE=4 SV=2	931.449	931.992	3220	3226	EHQQHPR		7
>tr|A0A6P7SER3|A0A6P7SER3_OCTVU hemocyanin 1-like OS=Octopus vulgaris OX=6645 GN=LOC115212215 PE=4 SV=2	940.499	941.075	2850	2857	YDITTSLK		8
>tr|A0A6P7SER3|A0A6P7SER3_OCTVU hemocyanin 1-like OS=Octopus vulgaris OX=6645 GN=LOC115212215 PE=4 SV=2	947.443	947.983	2095	2102	NVDSLDER		8
>tr|A0A6P7SER3|A0A6P7SER3_OCTVU hemocyanin 1-like OS=Octopus vulgaris OX=6645 GN=LOC115212215 PE=4 SV=2	947.443	947.983	5017	5024	NVDSLDER		8
>tr|A0A6P7SER3|A0A6P7SER3_OCTVU hemocyanin 1-like OS=Octopus vulgaris OX=6645 GN=LOC115212215 PE=4 SV=2	961.429	962.073	414	422	DADMAPVDK		9
>tr|A0A6P7SER3|A0A6P7SER3_OCTVU hemocyanin 1-like OS=Octopus vulgaris OX=6645 GN=LOC115212215 PE=4 SV=2	977.424	978.072	414	422	DADMAPVDK		9
>tr|A0A6P7SER3|A0A6P7SER3_OCTVU hemocyanin 1-like OS=Octopus vulgaris OX=6645 GN=LOC115212215 PE=4 SV=2	988.531	989.12	253	261	DTNPISLTK		9
>tr|A0A6P7SER3|A0A6P7SER3_OCTVU hemocyanin 1-like OS=Octopus vulgaris OX=6645 GN=LOC115212215 PE=4 SV=2	988.531	989.12	3175	3183	DTNPISLTK		9
>tr|A0A6P7SER3|A0A6P7SER3_OCTVU hemocyanin 1-like OS=Octopus vulgaris OX=6645 GN=LOC115212215 PE=4 SV=2	989.436	990.086	3336	3344	DADMAPVDR		9
>tr|A0A6P7SER3|A0A6P7SER3_OCTVU hemocyanin 1-like OS=Octopus vulgaris OX=6645 GN=LOC115212215 PE=4 SV=2	1005.43	1006.09	3336	3344	DADMAPVDR		9
>tr|A0A6P7SER3|A0A6P7SER3_OCTVU hemocyanin 1-like OS=Octopus vulgaris OX=6645 GN=LOC115212215 PE=4 SV=2	1009.52	1010.14	1612	1619	YEITDQLK		8
>tr|A0A6P7SER3|A0A6P7SER3_OCTVU hemocyanin 1-like OS=Octopus vulgaris OX=6645 GN=LOC115212215 PE=4 SV=2	1009.52	1010.14	4534	4541	YEITDQLK		8
>tr|A0A6P7SER3|A0A6P7SER3_OCTVU hemocyanin 1-like OS=Octopus vulgaris OX=6645 GN=LOC115212215 PE=4 SV=2	1038.55	1039.18	4307	4315	ISFLNSETK		9
>tr|A0A6P7SER3|A0A6P7SER3_OCTVU hemocyanin 1-like OS=Octopus vulgaris OX=6645 GN=LOC115212215 PE=4 SV=2	1046.52	1047.22	322	331	VAVCVPTDDK		10
>tr|A0A6P7SER3|A0A6P7SER3_OCTVU hemocyanin 1-like OS=Octopus vulgaris OX=6645 GN=LOC115212215 PE=4 SV=2	1046.52	1047.22	3244	3253	VAVCVPTDDK		10
>tr|A0A6P7SER3|A0A6P7SER3_OCTVU hemocyanin 1-like OS=Octopus vulgaris OX=6645 GN=LOC115212215 PE=4 SV=2	1052.49	1053.12	860	868	ALQAYEDDK		9
>tr|A0A6P7SER3|A0A6P7SER3_OCTVU hemocyanin 1-like OS=Octopus vulgaris OX=6645 GN=LOC115212215 PE=4 SV=2	1052.49	1053.12	3782	3790	ALQAYEDDK		9
>tr|A0A6P7SER3|A0A6P7SER3_OCTVU hemocyanin 1-like OS=Octopus vulgaris OX=6645 GN=LOC115212215 PE=4 SV=2	1062.51	1063.16	2637	2645	AQLFDDPEK		9
>tr|A0A6P7SER3|A0A6P7SER3_OCTVU hemocyanin 1-like OS=Octopus vulgaris OX=6645 GN=LOC115212215 PE=4 SV=2	1062.51	1063.16	5559	5567	AQLFDDPEK		9
>tr|A0A6P7SER3|A0A6P7SER3_OCTVU hemocyanin 1-like OS=Octopus vulgaris OX=6645 GN=LOC115212215 PE=4 SV=2	1073.51	1074.31	2898	2906	GHLEEVMMK		9
>tr|A0A6P7SER3|A0A6P7SER3_OCTVU hemocyanin 1-like OS=Octopus vulgaris OX=6645 GN=LOC115212215 PE=4 SV=2	1089.51	1090.31	2898	2906	GHLEEVMMK		9
>tr|A0A6P7SER3|A0A6P7SER3_OCTVU hemocyanin 1-like OS=Octopus vulgaris OX=6645 GN=LOC115212215 PE=4 SV=2	1093.58	1094.33	2440	2448	MDITHVIHK		9
>tr|A0A6P7SER3|A0A6P7SER3_OCTVU hemocyanin 1-like OS=Octopus vulgaris OX=6645 GN=LOC115212215 PE=4 SV=2	1093.58	1094.33	5362	5370	MDITHVIHK		9
>tr|A0A6P7SER3|A0A6P7SER3_OCTVU hemocyanin 1-like OS=Octopus vulgaris OX=6645 GN=LOC115212215 PE=4 SV=2	1105.5	1106.31	2898	2906	GHLEEVMMK		9
>tr|A0A6P7SER3|A0A6P7SER3_OCTVU hemocyanin 1-like OS=Octopus vulgaris OX=6645 GN=LOC115212215 PE=4 SV=2	1109.58	1110.33	2440	2448	MDITHVIHK		9
>tr|A0A6P7SER3|A0A6P7SER3_OCTVU hemocyanin 1-like OS=Octopus vulgaris OX=6645 GN=LOC115212215 PE=4 SV=2	1109.58	1110.33	5362	5370	MDITHVIHK		9
>tr|A0A6P7SER3|A0A6P7SER3_OCTVU hemocyanin 1-like OS=Octopus vulgaris OX=6645 GN=LOC115212215 PE=4 SV=2	1154.55	1155.22	1667	1676	HEESNGNLVR		10
>tr|A0A6P7SER3|A0A6P7SER3_OCTVU hemocyanin 1-like OS=Octopus vulgaris OX=6645 GN=LOC115212215 PE=4 SV=2	1154.55	1155.22	4589	4598	HEESNGNLVR		10
>tr|A0A6P7SER3|A0A6P7SER3_OCTVU hemocyanin 1-like OS=Octopus vulgaris OX=6645 GN=LOC115212215 PE=4 SV=2	1180.6	1181.3	1385	1394	ISFLNSETNR		10
>tr|A0A6P7SER3|A0A6P7SER3_OCTVU hemocyanin 1-like OS=Octopus vulgaris OX=6645 GN=LOC115212215 PE=4 SV=2	1188.55	1189.27	2861	2870	LDAHDDFDIK		10
>tr|A0A6P7SER3|A0A6P7SER3_OCTVU hemocyanin 1-like OS=Octopus vulgaris OX=6645 GN=LOC115212215 PE=4 SV=2	1201.64	1202.36	2512	2522	NVNSLTPTDIK		11
>tr|A0A6P7SER3|A0A6P7SER3_OCTVU hemocyanin 1-like OS=Octopus vulgaris OX=6645 GN=LOC115212215 PE=4 SV=2	1201.64	1202.36	5434	5444	NVNSLTPTDIK		11
>tr|A0A6P7SER3|A0A6P7SER3_OCTVU hemocyanin 1-like OS=Octopus vulgaris OX=6645 GN=LOC115212215 PE=4 SV=2	1202.57	1203.3	5783	5792	LDAHDDFEIK		10
>tr|A0A6P7SER3|A0A6P7SER3_OCTVU hemocyanin 1-like OS=Octopus vulgaris OX=6645 GN=LOC115212215 PE=4 SV=2	1224.63	1225.4	1156	1165	QSALVEYYIR		10
>tr|A0A6P7SER3|A0A6P7SER3_OCTVU hemocyanin 1-like OS=Octopus vulgaris OX=6645 GN=LOC115212215 PE=4 SV=2	1224.63	1225.4	4078	4087	QSALVEYYIR		10
>tr|A0A6P7SER3|A0A6P7SER3_OCTVU hemocyanin 1-like OS=Octopus vulgaris OX=6645 GN=LOC115212215 PE=4 SV=2	1241.65	1242.43	1156	1165	QSALVEYYIR		10
>tr|A0A6P7SER3|A0A6P7SER3_OCTVU hemocyanin 1-like OS=Octopus vulgaris OX=6645 GN=LOC115212215 PE=4 SV=2	1241.65	1242.43	4078	4087	QSALVEYYIR		10
>tr|A0A6P7SER3|A0A6P7SER3_OCTVU hemocyanin 1-like OS=Octopus vulgaris OX=6645 GN=LOC115212215 PE=4 SV=2	1242.7	1243.5	2712	2721	IWAVWQALQK		10
>tr|A0A6P7SER3|A0A6P7SER3_OCTVU hemocyanin 1-like OS=Octopus vulgaris OX=6645 GN=LOC115212215 PE=4 SV=2	1242.7	1243.5	5634	5643	IWAVWQALQK		10
>tr|A0A6P7SER3|A0A6P7SER3_OCTVU hemocyanin 1-like OS=Octopus vulgaris OX=6645 GN=LOC115212215 PE=4 SV=2	1245.66	1246.48	2103	2113	DIQNLMAALTR		11
>tr|A0A6P7SER3|A0A6P7SER3_OCTVU hemocyanin 1-like OS=Octopus vulgaris OX=6645 GN=LOC115212215 PE=4 SV=2	1245.66	1246.48	5025	5035	DIQNLMAALTR		11
>tr|A0A6P7SER3|A0A6P7SER3_OCTVU hemocyanin 1-like OS=Octopus vulgaris OX=6645 GN=LOC115212215 PE=4 SV=2	1245.74	1246.55	219	228	LFVIWQALQK		10
>tr|A0A6P7SER3|A0A6P7SER3_OCTVU hemocyanin 1-like OS=Octopus vulgaris OX=6645 GN=LOC115212215 PE=4 SV=2	1245.74	1246.55	3141	3150	LFVIWQALQK		10
>tr|A0A6P7SER3|A0A6P7SER3_OCTVU hemocyanin 1-like OS=Octopus vulgaris OX=6645 GN=LOC115212215 PE=4 SV=2	1255.68	1256.56	1145	1155	VFATFMLEGIK		11
>tr|A0A6P7SER3|A0A6P7SER3_OCTVU hemocyanin 1-like OS=Octopus vulgaris OX=6645 GN=LOC115212215 PE=4 SV=2	1255.68	1256.56	4067	4077	VFATFMLEGIK		11
>tr|A0A6P7SER3|A0A6P7SER3_OCTVU hemocyanin 1-like OS=Octopus vulgaris OX=6645 GN=LOC115212215 PE=4 SV=2	1261.66	1262.48	2103	2113	DIQNLMAALTR		11
>tr|A0A6P7SER3|A0A6P7SER3_OCTVU hemocyanin 1-like OS=Octopus vulgaris OX=6645 GN=LOC115212215 PE=4 SV=2	1261.66	1262.48	5025	5035	DIQNLMAALTR		11
>tr|A0A6P7SER3|A0A6P7SER3_OCTVU hemocyanin 1-like OS=Octopus vulgaris OX=6645 GN=LOC115212215 PE=4 SV=2	1271.67	1272.56	1145	1155	VFATFMLEGIK		11
>tr|A0A6P7SER3|A0A6P7SER3_OCTVU hemocyanin 1-like OS=Octopus vulgaris OX=6645 GN=LOC115212215 PE=4 SV=2	1271.67	1272.56	4067	4077	VFATFMLEGIK		11
>tr|A0A6P7SER3|A0A6P7SER3_OCTVU hemocyanin 1-like OS=Octopus vulgaris OX=6645 GN=LOC115212215 PE=4 SV=2	1289.72	1290.51	911	921	LLTINFENGLR		11
>tr|A0A6P7SER3|A0A6P7SER3_OCTVU hemocyanin 1-like OS=Octopus vulgaris OX=6645 GN=LOC115212215 PE=4 SV=2	1289.72	1290.51	3833	3843	LLTINFENGLR		11
>tr|A0A6P7SER3|A0A6P7SER3_OCTVU hemocyanin 1-like OS=Octopus vulgaris OX=6645 GN=LOC115212215 PE=4 SV=2	1298.7	1299.48	1620	1630	LLGLNQNSHFR		11
>tr|A0A6P7SER3|A0A6P7SER3_OCTVU hemocyanin 1-like OS=Octopus vulgaris OX=6645 GN=LOC115212215 PE=4 SV=2	1298.7	1299.48	4542	4552	LLGLNQNSHFR		11
>tr|A0A6P7SER3|A0A6P7SER3_OCTVU hemocyanin 1-like OS=Octopus vulgaris OX=6645 GN=LOC115212215 PE=4 SV=2	1311.58	1312.34	2531	2542	VQADSSDNGYQK		12
>tr|A0A6P7SER3|A0A6P7SER3_OCTVU hemocyanin 1-like OS=Octopus vulgaris OX=6645 GN=LOC115212215 PE=4 SV=2	1311.58	1312.34	5453	5464	VQADSSDNGYQK		12
>tr|A0A6P7SER3|A0A6P7SER3_OCTVU hemocyanin 1-like OS=Octopus vulgaris OX=6645 GN=LOC115212215 PE=4 SV=2	1342.72	1343.58	1372	1382	TLHIEPNPFFK		11
>tr|A0A6P7SER3|A0A6P7SER3_OCTVU hemocyanin 1-like OS=Octopus vulgaris OX=6645 GN=LOC115212215 PE=4 SV=2	1342.72	1343.58	4294	4304	TLHIEPNPFFK		11
>tr|A0A6P7SER3|A0A6P7SER3_OCTVU hemocyanin 1-like OS=Octopus vulgaris OX=6645 GN=LOC115212215 PE=4 SV=2	1342.73	1343.58	1467	1476	IWAIWQELQR		10
>tr|A0A6P7SER3|A0A6P7SER3_OCTVU hemocyanin 1-like OS=Octopus vulgaris OX=6645 GN=LOC115212215 PE=4 SV=2	1342.73	1343.58	4389	4398	IWAIWQELQR		10
>tr|A0A6P7SER3|A0A6P7SER3_OCTVU hemocyanin 1-like OS=Octopus vulgaris OX=6645 GN=LOC115212215 PE=4 SV=2	1342.75	1343.62	1891	1900	LWVIWQELQK		10
>tr|A0A6P7SER3|A0A6P7SER3_OCTVU hemocyanin 1-like OS=Octopus vulgaris OX=6645 GN=LOC115212215 PE=4 SV=2	1342.75	1343.62	4813	4822	LWVIWQELQK		10
>tr|A0A6P7SER3|A0A6P7SER3_OCTVU hemocyanin 1-like OS=Octopus vulgaris OX=6645 GN=LOC115212215 PE=4 SV=2	1343.64	1344.43	433	443	SLTTEEEHELR		11
>tr|A0A6P7SER3|A0A6P7SER3_OCTVU hemocyanin 1-like OS=Octopus vulgaris OX=6645 GN=LOC115212215 PE=4 SV=2	1354.64	1355.52	1070	1081	YNSANCAIETLR		12
>tr|A0A6P7SER3|A0A6P7SER3_OCTVU hemocyanin 1-like OS=Octopus vulgaris OX=6645 GN=LOC115212215 PE=4 SV=2	1354.64	1355.52	3992	4003	YNSANCAIETLR		12
>tr|A0A6P7SER3|A0A6P7SER3_OCTVU hemocyanin 1-like OS=Octopus vulgaris OX=6645 GN=LOC115212215 PE=4 SV=2	1355.68	1356.48	3355	3365	SLTIEEEHELR		11
>tr|A0A6P7SER3|A0A6P7SER3_OCTVU hemocyanin 1-like OS=Octopus vulgaris OX=6645 GN=LOC115212215 PE=4 SV=2	1371.64	1372.48	831	841	ESDVVFDELYR		11
>tr|A0A6P7SER3|A0A6P7SER3_OCTVU hemocyanin 1-like OS=Octopus vulgaris OX=6645 GN=LOC115212215 PE=4 SV=2	1371.64	1372.48	3753	3763	ESDVVFDELYR		11
>tr|A0A6P7SER3|A0A6P7SER3_OCTVU hemocyanin 1-like OS=Octopus vulgaris OX=6645 GN=LOC115212215 PE=4 SV=2	1409.69	1410.64	2159	2169	VYLLHFEDSMR		11
>tr|A0A6P7SER3|A0A6P7SER3_OCTVU hemocyanin 1-like OS=Octopus vulgaris OX=6645 GN=LOC115212215 PE=4 SV=2	1409.69	1410.64	5081	5091	VYLLHFEDSMR		11
>tr|A0A6P7SER3|A0A6P7SER3_OCTVU hemocyanin 1-like OS=Octopus vulgaris OX=6645 GN=LOC115212215 PE=4 SV=2	1419.76	1420.62	2082	2093	DIDVDIPLNHIR		12
>tr|A0A6P7SER3|A0A6P7SER3_OCTVU hemocyanin 1-like OS=Octopus vulgaris OX=6645 GN=LOC115212215 PE=4 SV=2	1419.76	1420.62	5004	5015	DIDVDIPLNHIR		12
>tr|A0A6P7SER3|A0A6P7SER3_OCTVU hemocyanin 1-like OS=Octopus vulgaris OX=6645 GN=LOC115212215 PE=4 SV=2	1422.67	1423.6	2724	2736	GLPYNSANCEINK		13
>tr|A0A6P7SER3|A0A6P7SER3_OCTVU hemocyanin 1-like OS=Octopus vulgaris OX=6645 GN=LOC115212215 PE=4 SV=2	1422.67	1423.6	5646	5658	GLPYNSANCEINK		13
>tr|A0A6P7SER3|A0A6P7SER3_OCTVU hemocyanin 1-like OS=Octopus vulgaris OX=6645 GN=LOC115212215 PE=4 SV=2	1425.68	1426.64	2159	2169	VYLLHFEDSMR		11
>tr|A0A6P7SER3|A0A6P7SER3_OCTVU hemocyanin 1-like OS=Octopus vulgaris OX=6645 GN=LOC115212215 PE=4 SV=2	1425.68	1426.64	5081	5091	VYLLHFEDSMR		11
>tr|A0A6P7SER3|A0A6P7SER3_OCTVU hemocyanin 1-like OS=Octopus vulgaris OX=6645 GN=LOC115212215 PE=4 SV=2	1482.69	1483.59	2214	2225	GYIEHEDTYTVR		12
>tr|A0A6P7SER3|A0A6P7SER3_OCTVU hemocyanin 1-like OS=Octopus vulgaris OX=6645 GN=LOC115212215 PE=4 SV=2	1482.69	1483.59	5136	5147	GYIEHEDTYTVR		12
>tr|A0A6P7SER3|A0A6P7SER3_OCTVU hemocyanin 1-like OS=Octopus vulgaris OX=6645 GN=LOC115212215 PE=4 SV=2	1482.69	1483.63	1101	1112	EHSVPFDVFDYK		12
>tr|A0A6P7SER3|A0A6P7SER3_OCTVU hemocyanin 1-like OS=Octopus vulgaris OX=6645 GN=LOC115212215 PE=4 SV=2	1482.69	1483.63	4023	4034	EHSVPFDVFDYK		12
>tr|A0A6P7SER3|A0A6P7SER3_OCTVU hemocyanin 1-like OS=Octopus vulgaris OX=6645 GN=LOC115212215 PE=4 SV=2	1486.82	1487.76	1744	1755	LFVVQFEQALHR		12
>tr|A0A6P7SER3|A0A6P7SER3_OCTVU hemocyanin 1-like OS=Octopus vulgaris OX=6645 GN=LOC115212215 PE=4 SV=2	1486.82	1487.76	4666	4677	LFVVQFEQALHR		12
>tr|A0A6P7SER3|A0A6P7SER3_OCTVU hemocyanin 1-like OS=Octopus vulgaris OX=6645 GN=LOC115212215 PE=4 SV=2	1486.86	1487.79	3418	3430	LVVIQFEDALIAR		13
>tr|A0A6P7SER3|A0A6P7SER3_OCTVU hemocyanin 1-like OS=Octopus vulgaris OX=6645 GN=LOC115212215 PE=4 SV=2	1497.76	1498.69	2347	2359	AAATPQHLFNYHK		13
>tr|A0A6P7SER3|A0A6P7SER3_OCTVU hemocyanin 1-like OS=Octopus vulgaris OX=6645 GN=LOC115212215 PE=4 SV=2	1497.76	1498.69	5269	5281	AAATPQHLFNYHK		13
>tr|A0A6P7SER3|A0A6P7SER3_OCTVU hemocyanin 1-like OS=Octopus vulgaris OX=6645 GN=LOC115212215 PE=4 SV=2	1502.86	1503.79	1328	1340	LYVALVENELLAR		13
>tr|A0A6P7SER3|A0A6P7SER3_OCTVU hemocyanin 1-like OS=Octopus vulgaris OX=6645 GN=LOC115212215 PE=4 SV=2	1502.86	1503.79	4250	4262	LYVALVENELLAR		13
>tr|A0A6P7SER3|A0A6P7SER3_OCTVU hemocyanin 1-like OS=Octopus vulgaris OX=6645 GN=LOC115212215 PE=4 SV=2	1504.82	1505.83	496	508	LVVMQFEDALIAR		13
>tr|A0A6P7SER3|A0A6P7SER3_OCTVU hemocyanin 1-like OS=Octopus vulgaris OX=6645 GN=LOC115212215 PE=4 SV=2	1517.73	1518.68	125	137	NVFYSGDIAFEQK		13
>tr|A0A6P7SER3|A0A6P7SER3_OCTVU hemocyanin 1-like OS=Octopus vulgaris OX=6645 GN=LOC115212215 PE=4 SV=2	1517.73	1518.68	3047	3059	NVFYSGDIAFEQK		13
>tr|A0A6P7SER3|A0A6P7SER3_OCTVU hemocyanin 1-like OS=Octopus vulgaris OX=6645 GN=LOC115212215 PE=4 SV=2	1520.81	1521.83	496	508	LVVMQFEDALIAR		13
>tr|A0A6P7SER3|A0A6P7SER3_OCTVU hemocyanin 1-like OS=Octopus vulgaris OX=6645 GN=LOC115212215 PE=4 SV=2	1541.84	1542.85	1682	1695	LSLSEMNSLVHALK		14
>tr|A0A6P7SER3|A0A6P7SER3_OCTVU hemocyanin 1-like OS=Octopus vulgaris OX=6645 GN=LOC115212215 PE=4 SV=2	1541.84	1542.85	4604	4617	LSLSEMNSLVHALK		14
>tr|A0A6P7SER3|A0A6P7SER3_OCTVU hemocyanin 1-like OS=Octopus vulgaris OX=6645 GN=LOC115212215 PE=4 SV=2	1550.82	1551.8	2303	2314	LWAIWQALQEHR		12
>tr|A0A6P7SER3|A0A6P7SER3_OCTVU hemocyanin 1-like OS=Octopus vulgaris OX=6645 GN=LOC115212215 PE=4 SV=2	1550.82	1551.8	5225	5236	LWAIWQALQEHR		12
>tr|A0A6P7SER3|A0A6P7SER3_OCTVU hemocyanin 1-like OS=Octopus vulgaris OX=6645 GN=LOC115212215 PE=4 SV=2	1554.82	1555.74	1265	1278	NLNSLTTGHIESLR		14
>tr|A0A6P7SER3|A0A6P7SER3_OCTVU hemocyanin 1-like OS=Octopus vulgaris OX=6645 GN=LOC115212215 PE=4 SV=2	1554.82	1555.74	4187	4200	NLNSLTTGHIESLR		14
>tr|A0A6P7SER3|A0A6P7SER3_OCTVU hemocyanin 1-like OS=Octopus vulgaris OX=6645 GN=LOC115212215 PE=4 SV=2	1557.83	1558.85	1682	1695	LSLSEMNSLVHALK		14
>tr|A0A6P7SER3|A0A6P7SER3_OCTVU hemocyanin 1-like OS=Octopus vulgaris OX=6645 GN=LOC115212215 PE=4 SV=2	1557.83	1558.85	4604	4617	LSLSEMNSLVHALK		14
>tr|A0A6P7SER3|A0A6P7SER3_OCTVU hemocyanin 1-like OS=Octopus vulgaris OX=6645 GN=LOC115212215 PE=4 SV=2	1559.75	1560.74	845	858	DVSSLTHADMNTLR		14
>tr|A0A6P7SER3|A0A6P7SER3_OCTVU hemocyanin 1-like OS=Octopus vulgaris OX=6645 GN=LOC115212215 PE=4 SV=2	1559.75	1560.74	3767	3780	DVSSLTHADMNTLR		14
>tr|A0A6P7SER3|A0A6P7SER3_OCTVU hemocyanin 1-like OS=Octopus vulgaris OX=6645 GN=LOC115212215 PE=4 SV=2	1575.74	1576.74	845	858	DVSSLTHADMNTLR		14
>tr|A0A6P7SER3|A0A6P7SER3_OCTVU hemocyanin 1-like OS=Octopus vulgaris OX=6645 GN=LOC115212215 PE=4 SV=2	1575.74	1576.74	3767	3780	DVSSLTHADMNTLR		14
>tr|A0A6P7SER3|A0A6P7SER3_OCTVU hemocyanin 1-like OS=Octopus vulgaris OX=6645 GN=LOC115212215 PE=4 SV=2	1603.81	1604.88	1567	1581	ASADVHIYICVPTSK		15
>tr|A0A6P7SER3|A0A6P7SER3_OCTVU hemocyanin 1-like OS=Octopus vulgaris OX=6645 GN=LOC115212215 PE=4 SV=2	1603.81	1604.88	4489	4503	ASADVHIYICVPTSK		15
>tr|A0A6P7SER3|A0A6P7SER3_OCTVU hemocyanin 1-like OS=Octopus vulgaris OX=6645 GN=LOC115212215 PE=4 SV=2	1611.77	1612.81	5729	5743	TIGQSADVNFDICTK		15
>tr|A0A6P7SER3|A0A6P7SER3_OCTVU hemocyanin 1-like OS=Octopus vulgaris OX=6645 GN=LOC115212215 PE=4 SV=2	1637.82	1638.89	782	796	YEITGALAELGVDMR		15
>tr|A0A6P7SER3|A0A6P7SER3_OCTVU hemocyanin 1-like OS=Octopus vulgaris OX=6645 GN=LOC115212215 PE=4 SV=2	1637.82	1638.89	3704	3718	YEITGALAELGVDMR		15
>tr|A0A6P7SER3|A0A6P7SER3_OCTVU hemocyanin 1-like OS=Octopus vulgaris OX=6645 GN=LOC115212215 PE=4 SV=2	1653.82	1654.89	782	796	YEITGALAELGVDMR		15
>tr|A0A6P7SER3|A0A6P7SER3_OCTVU hemocyanin 1-like OS=Octopus vulgaris OX=6645 GN=LOC115212215 PE=4 SV=2	1653.82	1654.89	3704	3718	YEITGALAELGVDMR		15
>tr|A0A6P7SER3|A0A6P7SER3_OCTVU hemocyanin 1-like OS=Octopus vulgaris OX=6645 GN=LOC115212215 PE=4 SV=2	1662.84	1663.88	1813	1826	EVSEYLYEHPVLGK		14
>tr|A0A6P7SER3|A0A6P7SER3_OCTVU hemocyanin 1-like OS=Octopus vulgaris OX=6645 GN=LOC115212215 PE=4 SV=2	1662.84	1663.88	4735	4748	EVSEYLYEHPVLGK		14
>tr|A0A6P7SER3|A0A6P7SER3_OCTVU hemocyanin 1-like OS=Octopus vulgaris OX=6645 GN=LOC115212215 PE=4 SV=2	1742.84	1743.89	5537	5551	ENNPFHHAHIDVANK		15
>tr|A0A6P7SER3|A0A6P7SER3_OCTVU hemocyanin 1-like OS=Octopus vulgaris OX=6645 GN=LOC115212215 PE=4 SV=2	1749.79	1750.88	2171	2185	HGSSVATPYWDWTDK		15
>tr|A0A6P7SER3|A0A6P7SER3_OCTVU hemocyanin 1-like OS=Octopus vulgaris OX=6645 GN=LOC115212215 PE=4 SV=2	1749.79	1750.88	5093	5107	HGSSVATPYWDWTDK		15
>tr|A0A6P7SER3|A0A6P7SER3_OCTVU hemocyanin 1-like OS=Octopus vulgaris OX=6645 GN=LOC115212215 PE=4 SV=2	1770.87	1771.94	2615	2629	ENNPFHHAHIDVVNK		15
>tr|A0A6P7SER3|A0A6P7SER3_OCTVU hemocyanin 1-like OS=Octopus vulgaris OX=6645 GN=LOC115212215 PE=4 SV=2	1816.92	1818.05	454	470	SIDGYQALAEFHGLPAK		17
>tr|A0A6P7SER3|A0A6P7SER3_OCTVU hemocyanin 1-like OS=Octopus vulgaris OX=6645 GN=LOC115212215 PE=4 SV=2	1816.92	1818.05	3376	3392	SIDGYQALAEFHGLPAK		17
>tr|A0A6P7SER3|A0A6P7SER3_OCTVU hemocyanin 1-like OS=Octopus vulgaris OX=6645 GN=LOC115212215 PE=4 SV=2	1917.02	1918.28	2476	2493	VLDSSSLPAPTMIYVPAR		18
>tr|A0A6P7SER3|A0A6P7SER3_OCTVU hemocyanin 1-like OS=Octopus vulgaris OX=6645 GN=LOC115212215 PE=4 SV=2	1917.02	1918.28	5398	5415	VLDSSSLPAPTMIYVPAR		18
>tr|A0A6P7SER3|A0A6P7SER3_OCTVU hemocyanin 1-like OS=Octopus vulgaris OX=6645 GN=LOC115212215 PE=4 SV=2	1933.01	1934.28	2476	2493	VLDSSSLPAPTMIYVPAR		18
>tr|A0A6P7SER3|A0A6P7SER3_OCTVU hemocyanin 1-like OS=Octopus vulgaris OX=6645 GN=LOC115212215 PE=4 SV=2	1933.01	1934.28	5398	5415	VLDSSSLPAPTMIYVPAR		18
>tr|A0A6P7SER3|A0A6P7SER3_OCTVU hemocyanin 1-like OS=Octopus vulgaris OX=6645 GN=LOC115212215 PE=4 SV=2	1952.87	1954.14	2364	2379	YDNLDFHGMDIDQLEK		16
>tr|A0A6P7SER3|A0A6P7SER3_OCTVU hemocyanin 1-like OS=Octopus vulgaris OX=6645 GN=LOC115212215 PE=4 SV=2	1952.87	1954.14	5286	5301	YDNLDFHGMDIDQLEK		16
>tr|A0A6P7SER3|A0A6P7SER3_OCTVU hemocyanin 1-like OS=Octopus vulgaris OX=6645 GN=LOC115212215 PE=4 SV=2	1968.86	1970.13	5286	5301	YDNLDFHGMDIDQLEK		16
>tr|A0A6P7SER3|A0A6P7SER3_OCTVU hemocyanin 1-like OS=Octopus vulgaris OX=6645 GN=LOC115212215 PE=4 SV=2	2029.08	2030.3	10	27	SVETLTEDEVLNLQVALR		18
>tr|A0A6P7SER3|A0A6P7SER3_OCTVU hemocyanin 1-like OS=Octopus vulgaris OX=6645 GN=LOC115212215 PE=4 SV=2	2029.08	2030.3	2932	2949	SVETLTEDEVLNLQVALR		18
>tr|A0A6P7SER3|A0A6P7SER3_OCTVU hemocyanin 1-like OS=Octopus vulgaris OX=6645 GN=LOC115212215 PE=4 SV=2	2126.03	2127.46	1082	1100	KPMSPFSLTSDINVDSMTR		19
>tr|A0A6P7SER3|A0A6P7SER3_OCTVU hemocyanin 1-like OS=Octopus vulgaris OX=6645 GN=LOC115212215 PE=4 SV=2	2126.03	2127.46	4004	4022	KPMSPFSLTSDINVDSMTR		19
>tr|A0A6P7SER3|A0A6P7SER3_OCTVU hemocyanin 1-like OS=Octopus vulgaris OX=6645 GN=LOC115212215 PE=4 SV=2	2137.18	2138.49	2737	2755	LTKPLKPFNLDSNHNAVTK		19
>tr|A0A6P7SER3|A0A6P7SER3_OCTVU hemocyanin 1-like OS=Octopus vulgaris OX=6645 GN=LOC115212215 PE=4 SV=2	2139.07	2140.37	2226	2244	DIRPELFEISGGEGSTLYR		19
>tr|A0A6P7SER3|A0A6P7SER3_OCTVU hemocyanin 1-like OS=Octopus vulgaris OX=6645 GN=LOC115212215 PE=4 SV=2	2139.07	2140.37	5148	5166	DIRPELFEISGGEGSTLYR		19
>tr|A0A6P7SER3|A0A6P7SER3_OCTVU hemocyanin 1-like OS=Octopus vulgaris OX=6645 GN=LOC115212215 PE=4 SV=2	2142.02	2143.46	1082	1100	KPMSPFSLTSDINVDSMTR		19
>tr|A0A6P7SER3|A0A6P7SER3_OCTVU hemocyanin 1-like OS=Octopus vulgaris OX=6645 GN=LOC115212215 PE=4 SV=2	2142.02	2143.46	4004	4022	KPMSPFSLTSDINVDSMTR		19
>tr|A0A6P7SER3|A0A6P7SER3_OCTVU hemocyanin 1-like OS=Octopus vulgaris OX=6645 GN=LOC115212215 PE=4 SV=2	2148.2	2149.51	2055	2075	IVAQNGTELPAGILPEATVVR		21
>tr|A0A6P7SER3|A0A6P7SER3_OCTVU hemocyanin 1-like OS=Octopus vulgaris OX=6645 GN=LOC115212215 PE=4 SV=2	2148.2	2149.51	4977	4997	IVAQNGTELPAGILPEATVVR		21
>tr|A0A6P7SER3|A0A6P7SER3_OCTVU hemocyanin 1-like OS=Octopus vulgaris OX=6645 GN=LOC115212215 PE=4 SV=2	2151.08	2152.43	1114	1131	NFHYEYDVLELNGLSIPK		18
>tr|A0A6P7SER3|A0A6P7SER3_OCTVU hemocyanin 1-like OS=Octopus vulgaris OX=6645 GN=LOC115212215 PE=4 SV=2	2151.08	2152.43	4036	4053	NFHYEYDVLELNGLSIPK		18
>tr|A0A6P7SER3|A0A6P7SER3_OCTVU hemocyanin 1-like OS=Octopus vulgaris OX=6645 GN=LOC115212215 PE=4 SV=2	2158.02	2159.46	1082	1100	KPMSPFSLTSDINVDSMTR		19
>tr|A0A6P7SER3|A0A6P7SER3_OCTVU hemocyanin 1-like OS=Octopus vulgaris OX=6645 GN=LOC115212215 PE=4 SV=2	2158.02	2159.46	4004	4022	KPMSPFSLTSDINVDSMTR		19
>tr|A0A6P7SER3|A0A6P7SER3_OCTVU hemocyanin 1-like OS=Octopus vulgaris OX=6645 GN=LOC115212215 PE=4 SV=2	2196.03	2197.39	1205	1221	EAHLHYNDQYHIEYHVK		17
>tr|A0A6P7SER3|A0A6P7SER3_OCTVU hemocyanin 1-like OS=Octopus vulgaris OX=6645 GN=LOC115212215 PE=4 SV=2	2196.03	2197.39	4127	4143	EAHLHYNDQYHIEYHVK		17
>tr|A0A6P7SER3|A0A6P7SER3_OCTVU hemocyanin 1-like OS=Octopus vulgaris OX=6645 GN=LOC115212215 PE=4 SV=2	2335.22	2336.66	2032	2052	IEITDVLANNNLAFDSPFTIK		21
>tr|A0A6P7SER3|A0A6P7SER3_OCTVU hemocyanin 1-like OS=Octopus vulgaris OX=6645 GN=LOC115212215 PE=4 SV=2	2335.22	2336.66	4954	4974	IEITDVLANNNLAFDSPFTIK		21
>tr|A0A6P7SER3|A0A6P7SER3_OCTVU hemocyanin 1-like OS=Octopus vulgaris OX=6645 GN=LOC115212215 PE=4 SV=2	2424.14	2425.88	53	74	APDGSTVVCCLHGMPTFPLWHR		22
>tr|A0A6P7SER3|A0A6P7SER3_OCTVU hemocyanin 1-like OS=Octopus vulgaris OX=6645 GN=LOC115212215 PE=4 SV=2	2424.14	2425.88	2975	2996	APDGSTVVCCLHGMPTFPLWHR		22
>tr|A0A6P7SER3|A0A6P7SER3_OCTVU hemocyanin 1-like OS=Octopus vulgaris OX=6645 GN=LOC115212215 PE=4 SV=2	2440.14	2441.88	53	74	APDGSTVVCCLHGMPTFPLWHR		22
>tr|A0A6P7SER3|A0A6P7SER3_OCTVU hemocyanin 1-like OS=Octopus vulgaris OX=6645 GN=LOC115212215 PE=4 SV=2	2440.14	2441.88	2975	2996	APDGSTVVCCLHGMPTFPLWHR		22
>tr|A0A6P7SER3|A0A6P7SER3_OCTVU hemocyanin 1-like OS=Octopus vulgaris OX=6645 GN=LOC115212215 PE=4 SV=2	2470.21	2471.81	1702	1725	SSDGFEAIASFHALPPLCPNPTAK		24
>tr|A0A6P7SER3|A0A6P7SER3_OCTVU hemocyanin 1-like OS=Octopus vulgaris OX=6645 GN=LOC115212215 PE=4 SV=2	2470.21	2471.81	4624	4647	SSDGFEAIASFHALPPLCPNPTAK		24
>tr|A0A6P7SER3|A0A6P7SER3_OCTVU hemocyanin 1-like OS=Octopus vulgaris OX=6645 GN=LOC115212215 PE=4 SV=2	2501.31	2502.89	2875	2897	SIDGHTLPNSYLTPPTVFFVPAK		23
>tr|A0A6P7SER3|A0A6P7SER3_OCTVU hemocyanin 1-like OS=Octopus vulgaris OX=6645 GN=LOC115212215 PE=4 SV=2	2505.24	2506.79	1509	1529	ITLTHSTPNDVFDYQNVLHYK		21
>tr|A0A6P7SER3|A0A6P7SER3_OCTVU hemocyanin 1-like OS=Octopus vulgaris OX=6645 GN=LOC115212215 PE=4 SV=2	2505.24	2506.79	4431	4451	ITLTHSTPNDVFDYQNVLHYK		21
>tr|A0A6P7SER3|A0A6P7SER3_OCTVU hemocyanin 1-like OS=Octopus vulgaris OX=6645 GN=LOC115212215 PE=4 SV=2	2541.18	2542.81	1790	1811	IESHNPFNHGHISFISEDTMTK		22
>tr|A0A6P7SER3|A0A6P7SER3_OCTVU hemocyanin 1-like OS=Octopus vulgaris OX=6645 GN=LOC115212215 PE=4 SV=2	2541.18	2542.81	4712	4733	IESHNPFNHGHISFISEDTMTK		22
>tr|A0A6P7SER3|A0A6P7SER3_OCTVU hemocyanin 1-like OS=Octopus vulgaris OX=6645 GN=LOC115212215 PE=4 SV=2	2548.09	2549.77	2119	2142	SDHGFQTIAGYHGSTMCPSPDDPK		24
>tr|A0A6P7SER3|A0A6P7SER3_OCTVU hemocyanin 1-like OS=Octopus vulgaris OX=6645 GN=LOC115212215 PE=4 SV=2	2548.09	2549.77	5041	5064	SDHGFQTIAGYHGSTMCPSPDDPK		24
>tr|A0A6P7SER3|A0A6P7SER3_OCTVU hemocyanin 1-like OS=Octopus vulgaris OX=6645 GN=LOC115212215 PE=4 SV=2	2557.18	2558.81	1790	1811	IESHNPFNHGHISFISEDTMTK		22
>tr|A0A6P7SER3|A0A6P7SER3_OCTVU hemocyanin 1-like OS=Octopus vulgaris OX=6645 GN=LOC115212215 PE=4 SV=2	2557.18	2558.81	4712	4733	IESHNPFNHGHISFISEDTMTK		22
>tr|A0A6P7SER3|A0A6P7SER3_OCTVU hemocyanin 1-like OS=Octopus vulgaris OX=6645 GN=LOC115212215 PE=4 SV=2	2564.08	2565.77	2119	2142	SDHGFQTIAGYHGSTMCPSPDDPK		24
>tr|A0A6P7SER3|A0A6P7SER3_OCTVU hemocyanin 1-like OS=Octopus vulgaris OX=6645 GN=LOC115212215 PE=4 SV=2	2564.08	2565.77	5041	5064	SDHGFQTIAGYHGSTMCPSPDDPK		24
>tr|A0A6P7SER3|A0A6P7SER3_OCTVU hemocyanin 1-like OS=Octopus vulgaris OX=6645 GN=LOC115212215 PE=4 SV=2	2583.3	2584.9	1530	1550	YDTLSFFDLTITQLEHLIEER		21
>tr|A0A6P7SER3|A0A6P7SER3_OCTVU hemocyanin 1-like OS=Octopus vulgaris OX=6645 GN=LOC115212215 PE=4 SV=2	2583.3	2584.9	4452	4472	YDTLSFFDLTITQLEHLIEER		21
>tr|A0A6P7SER3|A0A6P7SER3_OCTVU hemocyanin 1-like OS=Octopus vulgaris OX=6645 GN=LOC115212215 PE=4 SV=2	2610.12	2611.84	2950	2974	AMQDDASPTGYQAIAAYHGEPADCK		25
>tr|A0A6P7SER3|A0A6P7SER3_OCTVU hemocyanin 1-like OS=Octopus vulgaris OX=6645 GN=LOC115212215 PE=4 SV=2	2612.33	2614	542	563	EVKPNPFFHAPVEFLHNDVFTK		22
>tr|A0A6P7SER3|A0A6P7SER3_OCTVU hemocyanin 1-like OS=Octopus vulgaris OX=6645 GN=LOC115212215 PE=4 SV=2	2612.33	2614	3464	3485	EVKPNPFFHAPVEFLHNDVFTK		22
>tr|A0A6P7SER3|A0A6P7SER3_OCTVU hemocyanin 1-like OS=Octopus vulgaris OX=6645 GN=LOC115212215 PE=4 SV=2	2622.16	2623.9	28	52	VMQDDASPTGFQAIAAYHGEPADCK		25
>tr|A0A6P7SER3|A0A6P7SER3_OCTVU hemocyanin 1-like OS=Octopus vulgaris OX=6645 GN=LOC115212215 PE=4 SV=2	2626.12	2627.84	2950	2974	AMQDDASPTGYQAIAAYHGEPADCK		25
>tr|A0A6P7SER3|A0A6P7SER3_OCTVU hemocyanin 1-like OS=Octopus vulgaris OX=6645 GN=LOC115212215 PE=4 SV=2	2626.25	2627.89	2192	2213	LLGDPDYYDAWTDNVIENPFLR		22
>tr|A0A6P7SER3|A0A6P7SER3_OCTVU hemocyanin 1-like OS=Octopus vulgaris OX=6645 GN=LOC115212215 PE=4 SV=2	2626.25	2627.89	5114	5135	LLGDPDYYDAWTDNVIENPFLR		22
>tr|A0A6P7SER3|A0A6P7SER3_OCTVU hemocyanin 1-like OS=Octopus vulgaris OX=6645 GN=LOC115212215 PE=4 SV=2	2638.15	2639.9	28	52	VMQDDASPTGFQAIAAYHGEPADCK		25
>tr|A0A6P7SER3|A0A6P7SER3_OCTVU hemocyanin 1-like OS=Octopus vulgaris OX=6645 GN=LOC115212215 PE=4 SV=2	2726.35	2727.96	743	770	TSANVDITVDSAGNTYNAGSITILGGSK		28
>tr|A0A6P7SER3|A0A6P7SER3_OCTVU hemocyanin 1-like OS=Octopus vulgaris OX=6645 GN=LOC115212215 PE=4 SV=2	2726.35	2727.96	3665	3692	TSANVDITVDSAGNTYNAGSITILGGSK		28
>tr|A0A6P7SER3|A0A6P7SER3_OCTVU hemocyanin 1-like OS=Octopus vulgaris OX=6645 GN=LOC115212215 PE=4 SV=2	2746.27	2748.02	869	894	SPNGYQQVAAFHGSTQWCPSPDAAVK		26
>tr|A0A6P7SER3|A0A6P7SER3_OCTVU hemocyanin 1-like OS=Octopus vulgaris OX=6645 GN=LOC115212215 PE=4 SV=2	2746.27	2748.02	3791	3816	SPNGYQQVAAFHGSTQWCPSPDAAVK		26
>tr|A0A6P7SER3|A0A6P7SER3_OCTVU hemocyanin 1-like OS=Octopus vulgaris OX=6645 GN=LOC115212215 PE=4 SV=2	2794.51	2796.26	1633	1658	TEVIAVNGSSIHANIFPNPTIIYVPK		26
>tr|A0A6P7SER3|A0A6P7SER3_OCTVU hemocyanin 1-like OS=Octopus vulgaris OX=6645 GN=LOC115212215 PE=4 SV=2	2794.51	2796.26	4555	4580	TEVIAVNGSSIHANIFPNPTIIYVPK		26
>tr|A0A6P7SER3|A0A6P7SER3_OCTVU hemocyanin 1-like OS=Octopus vulgaris OX=6645 GN=LOC115212215 PE=4 SV=2	2809.18	2811.17	5744	5768	DGDCVFGGTFCILGGEHEMFWAFDR		25
>tr|A0A6P7SER3|A0A6P7SER3_OCTVU hemocyanin 1-like OS=Octopus vulgaris OX=6645 GN=LOC115212215 PE=4 SV=2	2810.22	2812.08	5334	5358	DTTCEDAGVVFVLGGDNEMPWHFDR		25
>tr|A0A6P7SER3|A0A6P7SER3_OCTVU hemocyanin 1-like OS=Octopus vulgaris OX=6645 GN=LOC115212215 PE=4 SV=2	2817.44	2819.21	923	946	NGYQNGIPYWDWTRPISELPALVK		24
>tr|A0A6P7SER3|A0A6P7SER3_OCTVU hemocyanin 1-like OS=Octopus vulgaris OX=6645 GN=LOC115212215 PE=4 SV=2	2817.44	2819.21	3845	3868	NGYQNGIPYWDWTRPISELPALVK		24
>tr|A0A6P7SER3|A0A6P7SER3_OCTVU hemocyanin 1-like OS=Octopus vulgaris OX=6645 GN=LOC115212215 PE=4 SV=2	2825.18	2827.16	5744	5768	DGDCVFGGTFCILGGEHEMFWAFDR		25
>tr|A0A6P7SER3|A0A6P7SER3_OCTVU hemocyanin 1-like OS=Octopus vulgaris OX=6645 GN=LOC115212215 PE=4 SV=2	2826.21	2828.08	5334	5358	DTTCEDAGVVFVLGGDNEMPWHFDR		25
>tr|A0A6P7SER3|A0A6P7SER3_OCTVU hemocyanin 1-like OS=Octopus vulgaris OX=6645 GN=LOC115212215 PE=4 SV=2	2828.47	2830.34	5793	5818	VTLNGIDGGILPHDYLSPPTVFFMPK		26
>tr|A0A6P7SER3|A0A6P7SER3_OCTVU hemocyanin 1-like OS=Octopus vulgaris OX=6645 GN=LOC115212215 PE=4 SV=2	2844.46	2846.34	5793	5818	VTLNGIDGGILPHDYLSPPTVFFMPK		26
>tr|A0A6P7SER3|A0A6P7SER3_OCTVU hemocyanin 1-like OS=Octopus vulgaris OX=6645 GN=LOC115212215 PE=4 SV=2	2865.34	2867.3	2279	2302	YAMSSLVYSSFDPLFYIHHSMVDR		24
>tr|A0A6P7SER3|A0A6P7SER3_OCTVU hemocyanin 1-like OS=Octopus vulgaris OX=6645 GN=LOC115212215 PE=4 SV=2	2865.34	2867.3	5201	5224	YAMSSLVYSSFDPLFYIHHSMVDR		24
>tr|A0A6P7SER3|A0A6P7SER3_OCTVU hemocyanin 1-like OS=Octopus vulgaris OX=6645 GN=LOC115212215 PE=4 SV=2	2881.33	2883.29	2279	2302	YAMSSLVYSSFDPLFYIHHSMVDR		24
>tr|A0A6P7SER3|A0A6P7SER3_OCTVU hemocyanin 1-like OS=Octopus vulgaris OX=6645 GN=LOC115212215 PE=4 SV=2	2881.33	2883.29	5201	5224	YAMSSLVYSSFDPLFYIHHSMVDR		24
>tr|A0A6P7SER3|A0A6P7SER3_OCTVU hemocyanin 1-like OS=Octopus vulgaris OX=6645 GN=LOC115212215 PE=4 SV=2	2897.33	2899.29	2279	2302	YAMSSLVYSSFDPLFYIHHSMVDR		24
>tr|A0A6P7SER3|A0A6P7SER3_OCTVU hemocyanin 1-like OS=Octopus vulgaris OX=6645 GN=LOC115212215 PE=4 SV=2	2897.33	2899.29	5201	5224	YAMSSLVYSSFDPLFYIHHSMVDR		24
>tr|A0A6P7SER3|A0A6P7SER3_OCTVU hemocyanin 1-like OS=Octopus vulgaris OX=6645 GN=LOC115212215 PE=4 SV=2	3044.58	3046.53	2449	2475	MHIPLEDLYVHGSTIHLEVVIETVDGK		27
>tr|A0A6P7SER3|A0A6P7SER3_OCTVU hemocyanin 1-like OS=Octopus vulgaris OX=6645 GN=LOC115212215 PE=4 SV=2	3044.58	3046.53	5371	5397	MHIPLEDLYVHGSTIHLEVVIETVDGK		27
>tr|A0A6P7SER3|A0A6P7SER3_OCTVU hemocyanin 1-like OS=Octopus vulgaris OX=6645 GN=LOC115212215 PE=4 SV=2	3060.57	3062.53	2449	2475	MHIPLEDLYVHGSTIHLEVVIETVDGK		27
>tr|A0A6P7SER3|A0A6P7SER3_OCTVU hemocyanin 1-like OS=Octopus vulgaris OX=6645 GN=LOC115212215 PE=4 SV=2	3060.57	3062.53	5371	5397	MHIPLEDLYVHGSTIHLEVVIETVDGK		27
>tr|A0A6P7SER3|A0A6P7SER3_OCTVU hemocyanin 1-like OS=Octopus vulgaris OX=6645 GN=LOC115212215 PE=4 SV=2	3061.32	3063.33	1582	1608	HEENCAHEAGVFSVLGGESEMPWQFDR		27
>tr|A0A6P7SER3|A0A6P7SER3_OCTVU hemocyanin 1-like OS=Octopus vulgaris OX=6645 GN=LOC115212215 PE=4 SV=2	3061.32	3063.33	4504	4530	HEENCAHEAGVFSVLGGESEMPWQFDR		27
>tr|A0A6P7SER3|A0A6P7SER3_OCTVU hemocyanin 1-like OS=Octopus vulgaris OX=6645 GN=LOC115212215 PE=4 SV=2	3062.41	3064.38	1441	1466	DPHSMSSLDFTAYDPIFFLHHSNIDR		26
>tr|A0A6P7SER3|A0A6P7SER3_OCTVU hemocyanin 1-like OS=Octopus vulgaris OX=6645 GN=LOC115212215 PE=4 SV=2	3062.41	3064.38	4363	4388	DPHSMSSLDFTAYDPIFFLHHSNIDR		26
>tr|A0A6P7SER3|A0A6P7SER3_OCTVU hemocyanin 1-like OS=Octopus vulgaris OX=6645 GN=LOC115212215 PE=4 SV=2	3064.4	3066.35	4871	4895	DNFHYEYDILDTNSMSINQIEAYIR		25
>tr|A0A6P7SER3|A0A6P7SER3_OCTVU hemocyanin 1-like OS=Octopus vulgaris OX=6645 GN=LOC115212215 PE=4 SV=2	3065.38	3067.33	1949	1973	DNFHYEYDILDTNSMSIDQIEAYIR		25
>tr|A0A6P7SER3|A0A6P7SER3_OCTVU hemocyanin 1-like OS=Octopus vulgaris OX=6645 GN=LOC115212215 PE=4 SV=2	3077.32	3079.33	1582	1608	HEENCAHEAGVFSVLGGESEMPWQFDR		27
>tr|A0A6P7SER3|A0A6P7SER3_OCTVU hemocyanin 1-like OS=Octopus vulgaris OX=6645 GN=LOC115212215 PE=4 SV=2	3077.32	3079.33	4504	4530	HEENCAHEAGVFSVLGGESEMPWQFDR		27
>tr|A0A6P7SER3|A0A6P7SER3_OCTVU hemocyanin 1-like OS=Octopus vulgaris OX=6645 GN=LOC115212215 PE=4 SV=2	3078.41	3080.38	1441	1466	DPHSMSSLDFTAYDPIFFLHHSNIDR		26
>tr|A0A6P7SER3|A0A6P7SER3_OCTVU hemocyanin 1-like OS=Octopus vulgaris OX=6645 GN=LOC115212215 PE=4 SV=2	3078.41	3080.38	4363	4388	DPHSMSSLDFTAYDPIFFLHHSNIDR		26
>tr|A0A6P7SER3|A0A6P7SER3_OCTVU hemocyanin 1-like OS=Octopus vulgaris OX=6645 GN=LOC115212215 PE=4 SV=2	3080.39	3082.35	4871	4895	DNFHYEYDILDTNSMSINQIEAYIR		25
>tr|A0A6P7SER3|A0A6P7SER3_OCTVU hemocyanin 1-like OS=Octopus vulgaris OX=6645 GN=LOC115212215 PE=4 SV=2	3080.48	3082.55	2321	2346	AYCALEQLSFPMKPFSWETNPNLHTR		26
>tr|A0A6P7SER3|A0A6P7SER3_OCTVU hemocyanin 1-like OS=Octopus vulgaris OX=6645 GN=LOC115212215 PE=4 SV=2	3080.48	3082.55	5243	5268	AYCALEQLSFPMKPFSWETNPNLHTR		26
>tr|A0A6P7SER3|A0A6P7SER3_OCTVU hemocyanin 1-like OS=Octopus vulgaris OX=6645 GN=LOC115212215 PE=4 SV=2	3081.38	3083.33	1949	1973	DNFHYEYDILDTNSMSIDQIEAYIR		25
>tr|A0A6P7SER3|A0A6P7SER3_OCTVU hemocyanin 1-like OS=Octopus vulgaris OX=6645 GN=LOC115212215 PE=4 SV=2	3096.47	3098.55	2321	2346	AYCALEQLSFPMKPFSWETNPNLHTR		26
>tr|A0A6P7SER3|A0A6P7SER3_OCTVU hemocyanin 1-like OS=Octopus vulgaris OX=6645 GN=LOC115212215 PE=4 SV=2	3096.47	3098.55	5243	5268	AYCALEQLSFPMKPFSWETNPNLHTR		26
>tr|A0A6P7SER3|A0A6P7SER3_OCTVU hemocyanin 1-like OS=Octopus vulgaris OX=6645 GN=LOC115212215 PE=4 SV=2	3114.44	3116.46	193	218	FAHSMSSLEYTSYDPLFFLHHSNVER		26
>tr|A0A6P7SER3|A0A6P7SER3_OCTVU hemocyanin 1-like OS=Octopus vulgaris OX=6645 GN=LOC115212215 PE=4 SV=2	3114.44	3116.46	3115	3140	FAHSMSSLEYTSYDPLFFLHHSNVER		26
>tr|A0A6P7SER3|A0A6P7SER3_OCTVU hemocyanin 1-like OS=Octopus vulgaris OX=6645 GN=LOC115212215 PE=4 SV=2	3130.44	3132.46	193	218	FAHSMSSLEYTSYDPLFFLHHSNVER		26
>tr|A0A6P7SER3|A0A6P7SER3_OCTVU hemocyanin 1-like OS=Octopus vulgaris OX=6645 GN=LOC115212215 PE=4 SV=2	3130.44	3132.46	3115	3140	FAHSMSSLEYTSYDPLFFLHHSNVER		26
>tr|A0A6P7SER3|A0A6P7SER3_OCTVU hemocyanin 1-like OS=Octopus vulgaris OX=6645 GN=LOC115212215 PE=4 SV=2	3137.52	3139.48	1865	1890	EELSLNHLHYAAYDPLFFLHHSNVDR		26
>tr|A0A6P7SER3|A0A6P7SER3_OCTVU hemocyanin 1-like OS=Octopus vulgaris OX=6645 GN=LOC115212215 PE=4 SV=2	3137.52	3139.48	4787	4812	EELSLNHLHYAAYDPLFFLHHSNVDR		26
>tr|A0A6P7SER3|A0A6P7SER3_OCTVU hemocyanin 1-like OS=Octopus vulgaris OX=6645 GN=LOC115212215 PE=4 SV=2	3140.35	3142.49	2409	2436	LCNDTTCEDAGVVFVLGGDNEMPWHFDR		28
>tr|A0A6P7SER3|A0A6P7SER3_OCTVU hemocyanin 1-like OS=Octopus vulgaris OX=6645 GN=LOC115212215 PE=4 SV=2	3156.35	3158.49	2409	2436	LCNDTTCEDAGVVFVLGGDNEMPWHFDR		28
>tr|A0A6P7SER3|A0A6P7SER3_OCTVU hemocyanin 1-like OS=Octopus vulgaris OX=6645 GN=LOC115212215 PE=4 SV=2	3268.6	3270.74	1480	1508	LPYNEANCALPLLNVPMRPFSNTTANHDR		29
>tr|A0A6P7SER3|A0A6P7SER3_OCTVU hemocyanin 1-like OS=Octopus vulgaris OX=6645 GN=LOC115212215 PE=4 SV=2	3268.6	3270.74	4402	4430	LPYNEANCALPLLNVPMRPFSNTTANHDR		29
>tr|A0A6P7SER3|A0A6P7SER3_OCTVU hemocyanin 1-like OS=Octopus vulgaris OX=6645 GN=LOC115212215 PE=4 SV=2	3284.59	3286.74	1480	1508	LPYNEANCALPLLNVPMRPFSNTTANHDR		29
>tr|A0A6P7SER3|A0A6P7SER3_OCTVU hemocyanin 1-like OS=Octopus vulgaris OX=6645 GN=LOC115212215 PE=4 SV=2	3284.59	3286.74	4402	4430	LPYNEANCALPLLNVPMRPFSNTTANHDR		29
>tr|A0A6P7SER3|A0A6P7SER3_OCTVU hemocyanin 1-like OS=Octopus vulgaris OX=6645 GN=LOC115212215 PE=4 SV=2	3294.48	3296.47	947	976	EETYLDENGEAHPNPFFSGVIDEAGAQTTR		30
>tr|A0A6P7SER3|A0A6P7SER3_OCTVU hemocyanin 1-like OS=Octopus vulgaris OX=6645 GN=LOC115212215 PE=4 SV=2	3294.48	3296.47	3869	3898	EETYLDENGEAHPNPFFSGVIDEAGAQTTR		30
>tr|A0A6P7SER3|A0A6P7SER3_OCTVU hemocyanin 1-like OS=Octopus vulgaris OX=6645 GN=LOC115212215 PE=4 SV=2	3411.56	3413.77	689	717	HAVPTEVYDYQSDLHYTYDTLFFGGMSVR		29
>tr|A0A6P7SER3|A0A6P7SER3_OCTVU hemocyanin 1-like OS=Octopus vulgaris OX=6645 GN=LOC115212215 PE=4 SV=2	3411.56	3413.77	3611	3639	HAVPTEVYDYQSDLHYTYDTLFFGGMSVR		29
>tr|A0A6P7SER3|A0A6P7SER3_OCTVU hemocyanin 1-like OS=Octopus vulgaris OX=6645 GN=LOC115212215 PE=4 SV=2	3427.56	3429.77	689	717	HAVPTEVYDYQSDLHYTYDTLFFGGMSVR		29
>tr|A0A6P7SER3|A0A6P7SER3_OCTVU hemocyanin 1-like OS=Octopus vulgaris OX=6645 GN=LOC115212215 PE=4 SV=2	3427.56	3429.77	3611	3639	HAVPTEVYDYQSDLHYTYDTLFFGGMSVR		29
>tr|A0A6P7SER3|A0A6P7SER3_OCTVU hemocyanin 1-like OS=Octopus vulgaris OX=6645 GN=LOC115212215 PE=4 SV=2	3442.84	3444.97	797	829	ADYSITLQITDINGTALPSTAIPDPIVIFTPGK		33
>tr|A0A6P7SER3|A0A6P7SER3_OCTVU hemocyanin 1-like OS=Octopus vulgaris OX=6645 GN=LOC115212215 PE=4 SV=2	3442.84	3444.97	3719	3751	ADYSITLQITDINGTALPSTAIPDPIVIFTPGK		33
>tr|A0A6P7SER3|A0A6P7SER3_OCTVU hemocyanin 1-like OS=Octopus vulgaris OX=6645 GN=LOC115212215 PE=4 SV=2	3454.81	3457.06	655	684	GKPYKPYCALSEVHRPLKPFAFEPPLNNNK		30
>tr|A0A6P7SER3|A0A6P7SER3_OCTVU hemocyanin 1-like OS=Octopus vulgaris OX=6645 GN=LOC115212215 PE=4 SV=2	3454.81	3457.06	3577	3606	GKPYKPYCALSEVHRPLKPFAFEPPLNNNK		30
>tr|A0A6P7SER3|A0A6P7SER3_OCTVU hemocyanin 1-like OS=Octopus vulgaris OX=6645 GN=LOC115212215 PE=4 SV=2	3510.59	3512.86	5685	5713	AFDYHELGYDYDNLNFHGMTIPELEEHLK		29
>tr|A0A6P7SER3|A0A6P7SER3_OCTVU hemocyanin 1-like OS=Octopus vulgaris OX=6645 GN=LOC115212215 PE=4 SV=2	3526.59	3528.86	5685	5713	AFDYHELGYDYDNLNFHGMTIPELEEHLK		29
>tr|A0A6P7SER3|A0A6P7SER3_OCTVU hemocyanin 1-like OS=Octopus vulgaris OX=6645 GN=LOC115212215 PE=4 SV=2	3556.72	3558.96	4263	4293	GSGVAVPYWDWIQPFDQLPALVNEATYYNSR		31
>tr|A0A6P7SER3|A0A6P7SER3_OCTVU hemocyanin 1-like OS=Octopus vulgaris OX=6645 GN=LOC115212215 PE=4 SV=2	3565.72	3567.97	1341	1371	GSGVAVPYWDWIQPFDHLPALVNEATYYNSR		31
>tr|A0A6P7SER3|A0A6P7SER3_OCTVU hemocyanin 1-like OS=Octopus vulgaris OX=6645 GN=LOC115212215 PE=4 SV=2	3596.64	3598.95	2762	2791	TAFNYHDLGYDYDNLNFHGMTIPELEEHLK		30
>tr|A0A6P7SER3|A0A6P7SER3_OCTVU hemocyanin 1-like OS=Octopus vulgaris OX=6645 GN=LOC115212215 PE=4 SV=2	3612.64	3614.95	2762	2791	TAFNYHDLGYDYDNLNFHGMTIPELEEHLK		30
>tr|A0A6P7SER3|A0A6P7SER3_OCTVU hemocyanin 1-like OS=Octopus vulgaris OX=6645 GN=LOC115212215 PE=4 SV=2	3728.77	3731.15	3188	3219	AVDLFDYNELGYDYDDLHLNGMDIPQLDTLLK		32
>tr|A0A6P7SER3|A0A6P7SER3_OCTVU hemocyanin 1-like OS=Octopus vulgaris OX=6645 GN=LOC115212215 PE=4 SV=2	3742.76	3745.18	509	541	GSQIGVPYWDWTKPSSELPPMVAAETYEDPYTK		33
>tr|A0A6P7SER3|A0A6P7SER3_OCTVU hemocyanin 1-like OS=Octopus vulgaris OX=6645 GN=LOC115212215 PE=4 SV=2	3744.76	3747.15	3188	3219	AVDLFDYNELGYDYDDLHLNGMDIPQLDTLLK		32
>tr|A0A6P7SER3|A0A6P7SER3_OCTVU hemocyanin 1-like OS=Octopus vulgaris OX=6645 GN=LOC115212215 PE=4 SV=2	3746.72	3749.19	266	297	AVDLFDYNELGYDYDDLHLNGMDIPQLDTLMK		32
>tr|A0A6P7SER3|A0A6P7SER3_OCTVU hemocyanin 1-like OS=Octopus vulgaris OX=6645 GN=LOC115212215 PE=4 SV=2	3758.76	3761.18	509	541	GSQIGVPYWDWTKPSSELPPMVAAETYEDPYTK		33
>tr|A0A6P7SER3|A0A6P7SER3_OCTVU hemocyanin 1-like OS=Octopus vulgaris OX=6645 GN=LOC115212215 PE=4 SV=2	3762.72	3765.19	266	297	AVDLFDYNELGYDYDDLHLNGMDIPQLDTLMK		32
>tr|A0A6P7SER3|A0A6P7SER3_OCTVU hemocyanin 1-like OS=Octopus vulgaris OX=6645 GN=LOC115212215 PE=4 SV=2	3778.71	3781.19	266	297	AVDLFDYNELGYDYDDLHLNGMDIPQLDTLMK		32
>tr|A0A6P7SER3|A0A6P7SER3_OCTVU hemocyanin 1-like OS=Octopus vulgaris OX=6645 GN=LOC115212215 PE=4 SV=2	3815.89	3818.37	5503	5536	QMEDALVAHGSHIGIPYWDWTTTFAHLPVLVAEK		34
>tr|A0A6P7SER3|A0A6P7SER3_OCTVU hemocyanin 1-like OS=Octopus vulgaris OX=6645 GN=LOC115212215 PE=4 SV=2	3822.88	3825.36	2581	2614	QMEDALVAHGSHIGIPYWDWTTTFANLPVLVTEK		34
>tr|A0A6P7SER3|A0A6P7SER3_OCTVU hemocyanin 1-like OS=Octopus vulgaris OX=6645 GN=LOC115212215 PE=4 SV=2	3831.88	3834.37	5503	5536	QMEDALVAHGSHIGIPYWDWTTTFAHLPVLVAEK		34
>tr|A0A6P7SER3|A0A6P7SER3_OCTVU hemocyanin 1-like OS=Octopus vulgaris OX=6645 GN=LOC115212215 PE=4 SV=2	3832.92	3835.4	5503	5536	QMEDALVAHGSHIGIPYWDWTTTFAHLPVLVAEK		34
>tr|A0A6P7SER3|A0A6P7SER3_OCTVU hemocyanin 1-like OS=Octopus vulgaris OX=6645 GN=LOC115212215 PE=4 SV=2	3838.88	3841.36	2581	2614	QMEDALVAHGSHIGIPYWDWTTTFANLPVLVTEK		34
>tr|A0A6P7SER3|A0A6P7SER3_OCTVU hemocyanin 1-like OS=Octopus vulgaris OX=6645 GN=LOC115212215 PE=4 SV=2	3839.91	3842.39	2581	2614	QMEDALVAHGSHIGIPYWDWTTTFANLPVLVTEK		34
>tr|A0A6P7SER3|A0A6P7SER3_OCTVU hemocyanin 1-like OS=Octopus vulgaris OX=6645 GN=LOC115212215 PE=4 SV=2	3848.91	3851.4	5503	5536	QMEDALVAHGSHIGIPYWDWTTTFAHLPVLVAEK		34
>tr|A0A6P7SER3|A0A6P7SER3_OCTVU hemocyanin 1-like OS=Octopus vulgaris OX=6645 GN=LOC115212215 PE=4 SV=2	3854.73	3857.44	2543	2576	IASYHGIPLSCHYPNGTAYACCQHGMVTFPHWHR		34
>tr|A0A6P7SER3|A0A6P7SER3_OCTVU hemocyanin 1-like OS=Octopus vulgaris OX=6645 GN=LOC115212215 PE=4 SV=2	3854.73	3857.44	5465	5498	IASYHGIPLSCHYPNGTAYACCQHGMVTFPHWHR		34
>tr|A0A6P7SER3|A0A6P7SER3_OCTVU hemocyanin 1-like OS=Octopus vulgaris OX=6645 GN=LOC115212215 PE=4 SV=2	3855.91	3858.39	2581	2614	QMEDALVAHGSHIGIPYWDWTTTFANLPVLVTEK		34
>tr|A0A6P7SER3|A0A6P7SER3_OCTVU hemocyanin 1-like OS=Octopus vulgaris OX=6645 GN=LOC115212215 PE=4 SV=2	3868.87	3871.39	1756	1789	HGATVGVPYWDWTRPISEIPAFIASEMYSDPFTK		34
[truncated: 12,195 more rows]

## Sheet: Pepsin Digested Peptides
Pepsin Digested Peptides (Peptide Ranker Values >0.90 and all)
Protein	m/z (mi)	m/z (av)	Start	End	Sequence	Peptide Ranker Values	Peptide Length
>tr|A0A7E6ESL5|A0A7E6ESL5_OCTVU prominin-1-A isoform X4 OS=Octopus vulgaris OX=6645 GN=LOC115210705 PE=3 SV=1	1892.72	1894.35	124	139	CCCRCCNRCGGRHMKY	0.970522	16
>tr|A0A7E6ETD0|A0A7E6ETD0_OCTVU adenylyl cyclase-associated protein 1 isoform X4 OS=Octopus vulgaris OX=6645 GN=LOC115210264 PE=3 SV=1	1254.69	1255.51	368	380	PPPPPPPPPPPPA	0.966356	13
>tr|A0A7E6FIQ7|A0A7E6FIQ7_OCTVU uncharacterized protein LOC115221679 isoform X1 OS=Octopus vulgaris OX=6645 GN=LOC115221679 PE=4 SV=1	2016.11	2017.4	381	400	PPPPPPPPPSKPNHPPPVGL	0.96064	20
>tr|A0A6P7SYF5|A0A6P7SYF5_OCTVU retinal dehydrogenase 2 OS=Octopus vulgaris OX=6645 GN=LOC115217865 PE=3 SV=1	807.229	808.013	294	300	CMGQCCF	0.95616	7
>tr|A0A6P7T0X7|A0A6P7T0X7_OCTVU ganglioside GM2 activator OS=Octopus vulgaris OX=6645 GN=LOC115218607 PE=4 SV=1	816.371	816.96	132	138	PQCPQPF	0.947135	7
>tr|A0A6P7S7T5|A0A6P7S7T5_OCTVU acid ceramidase-like OS=Octopus vulgaris OX=6645 GN=LOC115209837 PE=3 SV=1	959.375	960.125	379	386	QKCPDPCW	0.944659	8
>tr|Q27Q56|Q27Q56_SEPOF Hemocyanin subunit 2 (Fragment) OS=Sepia officinalis OX=6610 PE=2 SV=1	849.392	849.99	1915	1921	SDPMRPF	0.938433	7
>Cluster-141421.4;orf1 len=365 frame:2 start:2 end:1096 gi|470476037|ref|XP_004342217.1| hypothetical protein ACA1_115170 [Acanthamoeba castellanii str. Neff]>gi|440799046|gb|ELR20107.1| hypothetical protein ACA1_115170 [Acanthamoeba castellanii str. Neff]	993.41	994.252	240	248	CGVCPKCHF	0.933815	9
>tr|Q27Q56|Q27Q56_SEPOF Hemocyanin subunit 2 (Fragment) OS=Sepia officinalis OX=6610 PE=2 SV=1	878.463	879.182	3162	3168	KKPMMPF	0.932566	8
>tr|A0A7E6FR50|A0A7E6FR50_OCTVU NADH-cytochrome b5 reductase OS=Octopus vulgaris OX=6645 GN=LOC115224390 PE=3 SV=1	845.372	846.127	257	264	MCGPPPMI	0.930352	8
>tr|A0A812CBL4|A0A812CBL4_SEPPH HSPA1s OS=Sepia pharaonis OX=158019 GN=SPHA_33061 PE=3 SV=1	1648.67	1649.98	633	650	GGMPGGMPGGMPGGMPNF	0.92432	18
>tr|A0A6P7T7L0|A0A6P7T7L0_OCTVU heat shock cognate 71 kDa protein OS=Octopus vulgaris OX=6645 GN=LOC115220772 PE=3 SV=1	1648.67	1649.98	615	632	GGMPGGMPGGMPGGMPNF	0.92432	18
>tr|A0A6P7S965|A0A6P7S965_OCTVU ras GTPase-activating protein-binding protein 2 OS=Octopus vulgaris OX=6645 GN=LOC115210285 PE=4 SV=1	891.462	892.077	102	108	GQPMRRF	0.920825	7
>tr|A0A0L8GSS4|A0A0L8GSS4_OCTBM AAA domain-containing protein OS=Octopus bimaculoides OX=37653 GN=OCBIM_22029167mg PE=3 SV=1 >tr|A0A6P7SHR1|A0A6P7SHR1_OCTVU 26S proteasome regulatory subunit 6B OS=Octopus vulgaris OX=6645 GN=LOC115213143 PE=3 SV=1	960.464	961.197	206	215	GPPGCGKTML	0.909643	10
>Cluster-58773.140088;orf1 len=263 frame:2 start:32 end:820 gi|357608316|gb|EHJ65928.1| Ecdysteroid-regulated 16 kDa protein [Danaus plexippus]	1374.51	1375.68	232	244	CRNDCGCVSCVCL	0.907811	13
>tr|A0A0L8GC35|A0A0L8GC35_OCTBM N-acyl-L-amino-acid amidohydrolase OS=Octopus bimaculoides OX=37653 GN=OCBIM_22036825mg PE=3 SV=1	1256.6	1257.42	203	214	KCPGNPGHGSRF	0.901021	12
>tr|A0A812EMG1|A0A812EMG1_SEPPH DNAH OS=Sepia pharaonis OX=158019 GN=SPHA_78697 PE=4 SV=1	801.375	802.011	1258	1263	KMMGRF	0.899477	6
>tr|A0A6P7TFA3|A0A6P7TFA3_OCTVU Polyol dehydrogenase OS=Octopus vulgaris OX=6645 GN=LOC115223465 PE=3 SV=1	840.433	841.095	109	114	CRKMRF	0.893403	6
>tr|A0A7E6EY74|A0A7E6EY74_OCTVU twitchin OS=Octopus vulgaris OX=6645 GN=LOC115213975 PE=3 SV=1	1113.54	1114.21	3831	3839	NDRPDPPRF	0.888842	9
>tr|A0A077B6R8|A0A077B6R8_EUPSC Hemocyanin subunit 1 OS=Euprymna scolopes OX=6613 GN=HCY1 PE=2 SV=1	889.471	890.102	1933	1939	NKPMRPF	0.882525	8
>tr|A0A812CBN1|A0A812CBN1_SEPPH Uncharacterized protein OS=Sepia pharaonis OX=158019 GN=SPHA_33848 PE=4 SV=1	1020.48	1021.26	1074	1081	MNQPMRPF	0.878413	8
>tr|W6CNR9|W6CNR9_SEPOF Hemocyanin subunit 3 OS=Sepia officinalis OX=6610 PE=2 SV=1	1020.48	1021.26	1515	1522	MNQPMRPF	0.878413	8
>tr|A0A812CD65|A0A812CD65_SEPPH Uncharacterized protein OS=Sepia pharaonis OX=158019 GN=SPHA_33819 PE=4 SV=1	1020.48	1021.26	1517	1524	MNQPMRPF	0.878413	8
>tr|A0A7E6FRZ6|A0A7E6FRZ6_OCTVU hemocyanin G-type, units Oda to Odg-like OS=Octopus vulgaris OX=6645 GN=LOC115225590 PE=4 SV=1	889.435	890.058	1517	1523	NQPMRPF	0.878413	7
>Cluster-58773.141566;orf1 len=422 frame:2 start:2 end:1267 gi|405964948|gb|EKC30386.1| Fructose-bisphosphate aldolase [Crassostrea gigas]	903.451	904.085	295	302	GHSCPKKF	0.867784	8
>tr|F0V3W2|F0V3W2_LEPCI Hemocyanin (Fragment) OS=Lepidochitona cinerea OX=256056 PE=2 SV=1	1007.39	1008.24	1316	1324	CCVHGMPNF	0.863711	9
>tr|A0A0L8HFB4|A0A0L8HFB4_OCTBM Pacifastin domain-containing protein OS=Octopus bimaculoides OX=37653 GN=OCBIM_22015839mg PE=4 SV=1	1000.4	1001.13	81	88	KDDCNRCF	0.860315	8
>Cluster-58773.94617;orf1 len=371 frame:1 start:124 end:1236 gi|405970764|gb|EKC35640.1| E3 ubiquitin-protein ligase TRAF7 [Crassostrea gigas]	891.304	892.066	202	209	CDSVSMCF	0.859367	8
>tr|A0A6P7S644|A0A6P7S644_OCTVU Proteasome subunit beta OS=Octopus vulgaris OX=6645 GN=LOC115209401 PE=3 SV=1	841.285	841.942	20	26	SDMGMDW	0.855788	7
>tr|A0A0L8IH79|A0A0L8IH79_OCTBM Uncharacterized protein OS=Octopus bimaculoides OX=37653 GN=OCBIM_22005008mg PE=3 SV=1	2568.03	2570.02	548	576	PKEDPPMPGGGGGMGGMGGMGGMGGMGGF	0.855256	29
>tr|A0A0L8GLX8|A0A0L8GLX8_OCTBM S-formylglutathione hydrolase OS=Octopus bimaculoides OX=37653 GN=OCBIM_22031609mg PE=3 SV=1	949.365	950.089	177	184	CNPVNCNW	0.854379	8
>tr|A0A6P7SER3|A0A6P7SER3_OCTVU hemocyanin 1-like OS=Octopus vulgaris OX=6645 GN=LOC115212215 PE=4 SV=2	860.445	861.06	1493	1499	NVPMRPF	0.853557	7
>tr|A0A6P7SDC4|A0A6P7SDC4_OCTVU hemocyanin G-type, units Oda to Odg OS=Octopus vulgaris OX=6645 GN=LOC115211670 PE=4 SV=2	860.445	861.06	1512	1518	NVPMRPF	0.853557	7
>Cluster-58773.162319;orf1 len=2921 frame:3 start:24 end:8786 gi|16596797|gb|AAK28276.2| hemocyanin G-type [Enteroctopus dofleini]	860.445	861.06	1516	1522	NVPMRPF	0.853557	7
>tr|Q9BJ58|Q9BJ58_ENTDO Hemocyanin G-type (Fragment) OS=Enteroctopus dofleini OX=267067 PE=4 SV=2	860.445	861.06	1517	1523	NVPMRPF	0.853557	7
>sp|O61363|HCYG_ENTDO Hemocyanin G-type, units Oda to Odg OS=Enteroctopus dofleini OX=267067 GN=ODHCY PE=1 SV=1	860.445	861.06	1488	1494	NVPMRPF	0.853557	7
>tr|A0A0L8FFZ3|A0A0L8FFZ3_OCTBM Tyrosinase_Cu-bd domain-containing protein (Fragment) OS=Octopus bimaculoides OX=37653 GN=OCBIM_22022789mg PE=4 SV=1	860.445	861.06	111	117	NVPMRPF	0.853557	7
>tr|A0A6P7UBL9|A0A6P7UBL9_OCTVU fatty-acid amide hydrolase 2 isoform X2 OS=Octopus vulgaris OX=6645 GN=LOC115232529 PE=3 SV=1	928.384	929.177	265	272	CVGPMCRY	0.852784	8
>tr|A0A6P7TRV9|A0A6P7TRV9_OCTVU Ubiquitin-activating enzyme E1 OS=Octopus vulgaris OX=6645 GN=LOC115225288 PE=3 SV=1	1051.55	1052.25	748	757	SGPKRCPHGL	0.851759	10
>tr|A0A6P7SVS2|A0A6P7SVS2_OCTVU UV excision repair protein RAD23 OS=Octopus vulgaris OX=6645 GN=LOC115216665 PE=3 SV=1	3034.28	3035.96	349	392	GSNVGSGGGTGVGTGVGSGGGGGGGGGGGGGGGGGGGGGGSNTA	0.84969	44
>tr|A0A7E6F0K3|A0A7E6F0K3_OCTVU phosphonoacetaldehyde hydrolase isoform X2 OS=Octopus vulgaris OX=6645 GN=LOC115215216 PE=3 SV=1	918.461	919.1	170	177	NGCRPKPF	0.844502	8
>tr|A0A6P7TGU1|A0A6P7TGU1_OCTVU actin-interacting protein 1 isoform X1 OS=Octopus vulgaris OX=6645 GN=LOC115223147 PE=4 SV=1	808.377	808.94	155	160	RQMNPF	0.843552	6
>tr|W6CNR9|W6CNR9_SEPOF Hemocyanin subunit 3 OS=Sepia officinalis OX=6610 PE=2 SV=1	862.424	863.032	1104	1110	RQPMSPF	0.842853	7
>tr|A0A7E6FRZ6|A0A7E6FRZ6_OCTVU hemocyanin G-type, units Oda to Odg-like OS=Octopus vulgaris OX=6645 GN=LOC115225590 PE=4 SV=1	862.424	863.032	1105	1111	RQPMSPF	0.842853	7
>tr|A0A0L8IDH2|A0A0L8IDH2_OCTBM Non-specific serine/threonine protein kinase OS=Octopus bimaculoides OX=37653 GN=OCBIM_22020713mg PE=3 SV=1	1310.63	1311.58	337	347	SQPVRPDHMML	0.842587	11
>tr|A0A7E6EHE9|A0A7E6EHE9_OCTVU prosaposin isoform X1 OS=Octopus vulgaris OX=6645 GN=LOC115209891 PE=4 SV=1	1245.54	1246.52	283	292	KDECKNCKMF	0.840219	10
>tr|A0A812CBN1|A0A812CBN1_SEPPH Uncharacterized protein OS=Sepia pharaonis OX=158019 GN=SPHA_33848 PE=4 SV=1	890.466	891.089	664	670	RRPMSPF	0.835692	7
>tr|A0A812CD65|A0A812CD65_SEPPH Uncharacterized protein OS=Sepia pharaonis OX=158019 GN=SPHA_33819 PE=4 SV=1	890.466	891.089	1106	1112	RRPMSPF	0.835692	7
>tr|Q27Q56|Q27Q56_SEPOF Hemocyanin subunit 2 (Fragment) OS=Sepia officinalis OX=6610 PE=2 SV=1	890.419	891.043	1500	1506	NEPMRPF	0.835595	7
>tr|A0A077B6R8|A0A077B6R8_EUPSC Hemocyanin subunit 1 OS=Euprymna scolopes OX=6613 GN=HCY1 PE=2 SV=1	890.419	891.043	1518	1524	NEPMRPF	0.835595	7
>tr|A0A7E6ETN4|A0A7E6ETN4_OCTVU protein-glutamine gamma-glutamyltransferase K OS=Octopus vulgaris OX=6645 GN=LOC115211974 PE=3 SV=1	877.373	878.129	383	391	CCGPCPVKA	0.833337	9
>tr|A0A812DEV9|A0A812DEV9_SEPPH Rab GDP dissociation inhibitor OS=Sepia pharaonis OX=158019 GN=SPHA_54563 PE=3 SV=1	991.401	992.167	57	65	NMGCPPPEF	0.833201	9
>tr|A0A6P7SKR8|A0A6P7SKR8_OCTVU Vesicle-fusing ATPase OS=Octopus vulgaris OX=6645 GN=LOC115213827 PE=4 SV=1 >tr|A0A0L8GAT1|A0A0L8GAT1_OCTBM Vesicle-fusing ATPase OS=Octopus bimaculoides OX=37653 GN=OCBIM_22037045mg PE=4 SV=1	829.424	830	515	523	GPPGCGKTL	0.829723	9
>tr|A0A7E6EZ05|A0A7E6EZ05_OCTVU Vinculin OS=Octopus vulgaris OX=6645 GN=LOC115214348 PE=3 SV=1	981.471	982.15	743	751	PPPPDMSQL	0.82529	9
>tr|A0A6P7SA56|A0A6P7SA56_OCTVU cathepsin B OS=Octopus vulgaris OX=6645 GN=LOC115210644 PE=3 SV=1	1514.47	1515.8	146	160	MTCCQSCGMGCNGGY	0.818959	15
>tr|A0A6P7STJ4|A0A6P7STJ4_OCTVU Carboxylic ester hydrolase OS=Octopus vulgaris OX=6645 GN=LOC115216415 PE=3 SV=1	913.508	914.168	443	449	RPKVMPW	0.81255	7
>tr|A0A812CYT6|A0A812CYT6_SEPPH MYH OS=Sepia pharaonis OX=158019 GN=SPHA_42230 PE=3 SV=1	972.497	973.189	43	50	QKMNPPKF	0.812238	8
>tr|A0A6P7TUI8|A0A6P7TUI8_OCTVU uncharacterized protein LOC115225721 OS=Octopus vulgaris OX=6645 GN=LOC115225721 PE=3 SV=1	1051.52	1052.24	300	309	PPCPTNPNVL	0.812193	10
>tr|A0A812CD65|A0A812CD65_SEPPH Uncharacterized protein OS=Sepia pharaonis OX=158019 GN=SPHA_33819 PE=4 SV=1	904.387	905.023	2451	2458	GSPTEMPW	0.80932	8
>tr|A0A6P7TEG5|A0A6P7TEG5_OCTVU Alpha-L-fucosidase OS=Octopus vulgaris OX=6645 GN=LOC115223232 PE=3 SV=1	802.294	802.848	264	270	SCHHGDF	0.808434	7
>tr|A0A6P7SER3|A0A6P7SER3_OCTVU hemocyanin 1-like OS=Octopus vulgaris OX=6645 GN=LOC115212215 PE=4 SV=2	862.46	863.076	1081	1087	RKPMSPF	0.808003	7
>tr|A0A6P7SDC4|A0A6P7SDC4_OCTVU hemocyanin G-type, units Oda to Odg OS=Octopus vulgaris OX=6645 GN=LOC115211670 PE=4 SV=2	862.46	863.076	1100	1106	RKPMSPF	0.808003	7
>Cluster-58773.162319;orf1 len=2921 frame:3 start:24 end:8786 gi|16596797|gb|AAK28276.2| hemocyanin G-type [Enteroctopus dofleini]	862.46	863.076	1104	1110	RKPMSPF	0.808003	7
>tr|Q9BJ58|Q9BJ58_ENTDO Hemocyanin G-type (Fragment) OS=Enteroctopus dofleini OX=267067 PE=4 SV=2	862.46	863.076	1105	1111	RKPMSPF	0.808003	7
>sp|O61363|HCYG_ENTDO Hemocyanin G-type, units Oda to Odg OS=Enteroctopus dofleini OX=267067 GN=ODHCY PE=1 SV=1	862.46	863.076	1076	1082	RKPMSPF	0.808003	7
>tr|Q27Q56|Q27Q56_SEPOF Hemocyanin subunit 2 (Fragment) OS=Sepia officinalis OX=6610 PE=2 SV=1	862.46	863.076	1088	1094	RKPMSPF	0.808003	7
>tr|A0A077B6R8|A0A077B6R8_EUPSC Hemocyanin subunit 1 OS=Euprymna scolopes OX=6613 GN=HCY1 PE=2 SV=1	862.46	863.076	1106	1112	RKPMSPF	0.808003	7
>tr|A0A0L8GKZ1|A0A0L8GKZ1_OCTBM Helicase C-terminal domain-containing protein OS=Octopus bimaculoides OX=37653 GN=OCBIM_22031992mg PE=4 SV=1	1735.1	1736.17	209	224	PTGTGKTXXXXRRPVL	0.804535	16
>tr|A0A6P7SER3|A0A6P7SER3_OCTVU hemocyanin 1-like OS=Octopus vulgaris OX=6645 GN=LOC115212215 PE=4 SV=2	871.377	871.996	3166	3172	HNPMEPF	0.804284	7
>tr|A0A077B6R8|A0A077B6R8_EUPSC Hemocyanin subunit 1 OS=Euprymna scolopes OX=6613 GN=HCY1 PE=2 SV=1	871.377	871.996	269	275	HNPMEPF	0.804284	7
>Cluster-58773.135700;orf1 len=265 frame:3 start:75 end:869 gi|283837550|dbj|BAI66447.1| serine protease 1 [Heterololigo bleekeri]	1017.43	1018.1	212	222	SPCQGDSGGPL	0.802168	11
>tr|A0A6P7TG88|A0A6P7TG88_OCTVU chymotrypsin B-like OS=Octopus vulgaris OX=6645 GN=LOC115222971 PE=4 SV=1	1017.43	1018.1	210	220	SPCQGDSGGPL	0.802168	11
>tr|A0A6P7SGA6|A0A6P7SGA6_OCTVU Clathrin heavy chain OS=Octopus vulgaris OX=6645 GN=LOC115212844 PE=3 SV=1	813.294	813.995	1645	1652	GPMSMGMA	0.801854	8
>tr|A0A7E6FRZ6|A0A7E6FRZ6_OCTVU hemocyanin G-type, units Oda to Odg-like OS=Octopus vulgaris OX=6645 GN=LOC115225590 PE=4 SV=1	927.406	928.124	1742	1750	PPMCPNPTA	0.795042	9
>Cluster-141421.4;orf1 len=365 frame:2 start:2 end:1096 gi|470476037|ref|XP_004342217.1| hypothetical protein ACA1_115170 [Acanthamoeba castellanii str. Neff]>gi|440799046|gb|ELR20107.1| hypothetical protein ACA1_115170 [Acanthamoeba castellanii str. Neff]	827.346	827.899	222	228	SSCNRNF	0.788566	7
>tr|A0A812CD65|A0A812CD65_SEPPH Uncharacterized protein OS=Sepia pharaonis OX=158019 GN=SPHA_33819 PE=4 SV=1	878.335	878.941	2043	2050	GGSDEMPW	0.787013	8
>Cluster-58773.108885;orf1 len=1084 frame:2 start:158 end:3409 gi|667467110|sp|B3EWZ9.1|HEPHL_ACRMI RecName: Full=Hephaestin-like protein; Flags: Precursor [Acropora millepora]	1112.46	1113.14	778	787	DDPDNPGHVF	0.786151	10
>tr|A0A7E6FLF6|A0A7E6FLF6_OCTVU leukotriene A-4 hydrolase-like OS=Octopus vulgaris OX=6645 GN=LOC115223638 PE=3 SV=1	820.333	820.967	257	264	GGMENPCL	0.782823	8
>tr|A0A6P7S5H1|A0A6P7S5H1_OCTVU Mannose-6-phosphate isomerase OS=Octopus vulgaris OX=6645 GN=LOC115209304 PE=3 SV=1	946.277	947.121	282	290	SGDCMECMA	0.780695	9
>tr|A0A812EMG1|A0A812EMG1_SEPPH DNAH OS=Sepia pharaonis OX=158019 GN=SPHA_78697 PE=4 SV=1	881.382	881.989	876	882	PSEDRMF	0.779749	7
>tr|Q27Q56|Q27Q56_SEPOF Hemocyanin subunit 2 (Fragment) OS=Sepia officinalis OX=6610 PE=2 SV=1	1390.48	1391.45	2424	2436	CPDSGDCHEGSHF	0.778548	13
>tr|A0A6P7SER3|A0A6P7SER3_OCTVU hemocyanin 1-like OS=Octopus vulgaris OX=6645 GN=LOC115212215 PE=4 SV=2	905.346	905.967	2425	2432	GGDNEMPW	0.778264	8
>tr|A0A6P7SDC4|A0A6P7SDC4_OCTVU hemocyanin G-type, units Oda to Odg OS=Octopus vulgaris OX=6645 GN=LOC115211670 PE=4 SV=2	905.346	905.967	2444	2451	GGDNEMPW	0.778264	8
>Cluster-58773.162319;orf1 len=2921 frame:3 start:24 end:8786 gi|16596797|gb|AAK28276.2| hemocyanin G-type [Enteroctopus dofleini]	905.346	905.967	2448	2455	GGDNEMPW	0.778264	8
>tr|Q9BJ58|Q9BJ58_ENTDO Hemocyanin G-type (Fragment) OS=Enteroctopus dofleini OX=267067 PE=4 SV=2	905.346	905.967	2449	2456	GGDNEMPW	0.778264	8
>sp|O61363|HCYG_ENTDO Hemocyanin G-type, units Oda to Odg OS=Enteroctopus dofleini OX=267067 GN=ODHCY PE=1 SV=1	905.346	905.967	2421	2428	GGDNEMPW	0.778264	8
>tr|A0A812EMG1|A0A812EMG1_SEPPH DNAH OS=Sepia pharaonis OX=158019 GN=SPHA_78697 PE=4 SV=1	2336.18	2337.71	94	113	SPEPPEGRPRRQCDRGVMRI	0.777903	20
>tr|A0A6P7T858|A0A6P7T858_OCTVU Fructose-bisphosphatase OS=Octopus vulgaris OX=6645 GN=LOC115220925 PE=3 SV=1	827.306	827.959	275	281	ECNPMSF	0.777145	7
>tr|A0A7E6FE51|A0A7E6FE51_OCTVU filamin-A isoform X1 OS=Octopus vulgaris OX=6645 GN=LOC115220251 PE=3 SV=1	889.46	890.099	1323	1330	NMPVKPGF	0.776933	8
>tr|A0A6P7TQ10|A0A6P7TQ10_OCTVU uncharacterized protein LOC115225177 OS=Octopus vulgaris OX=6645 GN=LOC115225177 PE=4 SV=1	903.366	903.995	376	383	QNPCPSQF	0.776658	8
>tr|A0A0L8HU60|A0A0L8HU60_OCTBM Tetratricopeptide repeat protein 38 OS=Octopus bimaculoides OX=37653 GN=OCBIM_22006847mg PE=3 SV=1	808.315	809.022	316	322	HSMMSCL	0.776293	7
>tr|A0A7E6FJ93|A0A7E6FJ93_OCTVU Annexin OS=Octopus vulgaris OX=6645 GN=LOC115223011 PE=3 SV=1	1111.54	1112.23	73	84	PPGSVPPSGPGY	0.775886	12
>tr|A0A6P7S965|A0A6P7S965_OCTVU ras GTPase-activating protein-binding protein 2 OS=Octopus vulgaris OX=6645 GN=LOC115210285 PE=4 SV=1	1699.8	1700.84	410	428	GGSGPEGGRPMSGRGGRGA	0.7746	19
>tr|A0A0L8I420|A0A0L8I420_OCTBM Uncharacterized protein (Fragment) OS=Octopus bimaculoides OX=37653 GN=OCBIM_22037121mg PE=3 SV=1	800.38	800.857	207	213	NNPRGGW	0.772669	7
>tr|A0A7E6F1S6|A0A7E6F1S6_OCTVU microtubule-associated protein futsch isoform X4 OS=Octopus vulgaris OX=6645 GN=LOC115215514 PE=4 SV=1	1602.85	1603.83	1434	1449	PSPPPPESKKPNGVTA	0.771121	16
>tr|A0A0L8G0N4|A0A0L8G0N4_OCTBM Prolyl endopeptidase OS=Octopus bimaculoides OX=37653 GN=OCBIM_22003476mg PE=3 SV=1	981.442	982.047	343	350	QNPDPKNW	0.770377	8
>tr|A0A7E6EY74|A0A7E6EY74_OCTVU twitchin OS=Octopus vulgaris OX=6645 GN=LOC115213975 PE=3 SV=1	933.486	934.152	213	220	EPKGKPMF	0.76934	8
>tr|A0A7E6EW98|A0A7E6EW98_OCTVU 10-formyltetrahydrofolate dehydrogenase OS=Octopus vulgaris OX=6645 GN=LOC115216749 PE=3 SV=1	1035.5	1036.2	773	782	GGKRVDCPGF	0.768462	10
>tr|A0A7E6FNE1|A0A7E6FNE1_OCTVU dystrophin isoform X4 OS=Octopus vulgaris OX=6645 GN=LOC115232614 PE=4 SV=1	828.302	828.947	3414	3420	DVCQNCF	0.767543	7
>Cluster-58773.88130;orf1 len=870 frame:3 start:327 end:2936 gi|762145751|ref|XP_011456155.1| PREDICTED: puromycin-sensitive aminopeptidase-like [Crassostrea gigas]	895.42	896.021	109	115	NDRMRGF	0.767137	7
>tr|A0A6P7SEM8|A0A6P7SEM8_OCTVU Alpha-mannosidase OS=Octopus vulgaris OX=6645 GN=LOC115211875 PE=3 SV=1	905.495	906.038	88	94	KDPSRRF	0.761671	7
>tr|A0A0L8FMS3|A0A0L8FMS3_OCTBM VWFC domain-containing protein OS=Octopus bimaculoides OX=37653 GN=OCBIM_22013879mg PE=4 SV=1	1347.48	1348.59	857	868	ECEEGCMCPPHL	0.759859	12
>Cluster-58773.198809;orf1 len=296 frame:2 start:149 end:1036 gi|871209239|ref|XP_012941697.1| PREDICTED: carbonic anhydrase 1-like [Aplysia californica] >Cluster-58773.198805;orf1 len=296 frame:-3 start:932 end:45 gi|871209239|ref|XP_012941697.1| PREDICTED: carbonic anhydrase 1-like [Aplysia californica] >Cluster-58773.198810;orf1 len=296 frame:2 start:251 end:1138 gi|871209239|ref|XP_012941697.…	1375.63	1376.6	91	103	SPEPKMSCVNNGL	0.756486	13
>tr|A0A7E6FAL0|A0A7E6FAL0_OCTVU protein hu-li tai shao isoform X12 OS=Octopus vulgaris OX=6645 GN=LOC115218883 PE=3 SV=1	1104.41	1105.37	349	357	MRMMDNCGF	0.75625	9
>tr|A0A7E6EY74|A0A7E6EY74_OCTVU twitchin OS=Octopus vulgaris OX=6645 GN=LOC115213975 PE=3 SV=1	802.421	802.914	945	951	RPQGPTF	0.749824	7
>tr|A0A6P7SER3|A0A6P7SER3_OCTVU hemocyanin 1-like OS=Octopus vulgaris OX=6645 GN=LOC115212215 PE=4 SV=2	1025.4	1026.25	2563	2571	CCQHGMVTF	0.745641	9
>tr|A0A6P7SDC4|A0A6P7SDC4_OCTVU hemocyanin G-type, units Oda to Odg OS=Octopus vulgaris OX=6645 GN=LOC115211670 PE=4 SV=2	1025.4	1026.25	2582	2590	CCQHGMVTF	0.745641	9
>Cluster-58773.162319;orf1 len=2921 frame:3 start:24 end:8786 gi|16596797|gb|AAK28276.2| hemocyanin G-type [Enteroctopus dofleini]	1025.4	1026.25	2586	2594	CCQHGMVTF	0.745641	9
>tr|Q9BJ58|Q9BJ58_ENTDO Hemocyanin G-type (Fragment) OS=Enteroctopus dofleini OX=267067 PE=4 SV=2	1025.4	1026.25	2587	2595	CCQHGMVTF	0.745641	9
>sp|O61363|HCYG_ENTDO Hemocyanin G-type, units Oda to Odg OS=Enteroctopus dofleini OX=267067 GN=ODHCY PE=1 SV=1	1025.4	1026.25	2559	2567	CCQHGMVTF	0.745641	9
>tr|Q27Q56|Q27Q56_SEPOF Hemocyanin subunit 2 (Fragment) OS=Sepia officinalis OX=6610 PE=2 SV=1	1025.4	1026.25	2987	2995	CCQHGMVTF	0.745641	9
>tr|A0A812CBN1|A0A812CBN1_SEPPH Uncharacterized protein OS=Sepia pharaonis OX=158019 GN=SPHA_33848 PE=4 SV=1	1025.4	1026.25	1870	1878	CCQHGMVTF	0.745641	9
>tr|A0A077B6R8|A0A077B6R8_EUPSC Hemocyanin subunit 1 OS=Euprymna scolopes OX=6613 GN=HCY1 PE=2 SV=1	1025.4	1026.25	3003	3011	CCQHGMVTF	0.745641	9
>tr|W6CNR9|W6CNR9_SEPOF Hemocyanin subunit 3 OS=Sepia officinalis OX=6610 PE=2 SV=1	1025.4	1026.25	2999	3007	CCQHGMVTF	0.745641	9
>tr|A0A812CD65|A0A812CD65_SEPPH Uncharacterized protein OS=Sepia pharaonis OX=158019 GN=SPHA_33819 PE=4 SV=1	1025.4	1026.25	2589	2597	CCQHGMVTF	0.745641	9
>tr|A0A7E6FRZ6|A0A7E6FRZ6_OCTVU hemocyanin G-type, units Oda to Odg-like OS=Octopus vulgaris OX=6645 GN=LOC115225590 PE=4 SV=1	1025.4	1026.25	2593	2601	CCQHGMVTF	0.745641	9
>tr|A0A6P7SUD6|A0A6P7SUD6_OCTVU 6-phosphogluconolactonase OS=Octopus vulgaris OX=6645 GN=LOC115216558 PE=3 SV=2	1350.74	1351.55	176	188	SDSPKPPPGRVTL	0.740972	13
>tr|A0A6P7SA56|A0A6P7SA56_OCTVU cathepsin B OS=Octopus vulgaris OX=6645 GN=LOC115210644 PE=3 SV=1	1005.49	1006.18	193	201	CDHHVPGKL	0.740008	9
>tr|A0A6P7TWP3|A0A6P7TWP3_OCTVU chymotrypsin-like protease CTRL-1 OS=Octopus vulgaris OX=6645 GN=LOC115226866 PE=4 SV=2	1080.43	1081.11	137	148	SSPCNGDSGGSL	0.738638	12
>tr|A0A6P7TGU1|A0A6P7TGU1_OCTVU actin-interacting protein 1 isoform X1 OS=Octopus vulgaris OX=6645 GN=LOC115223147 PE=4 SV=1	960.493	961.135	111	118	SPDNKRML	0.736795	8
>tr|A0A6P7TK16|A0A6P7TK16_OCTVU Phosphomannomutase OS=Octopus vulgaris OX=6645 GN=LOC115223856 PE=3 SV=1	913.438	914.143	126	132	RKSMMNF	0.735783	7
>tr|A0A6P7SXS2|A0A6P7SXS2_OCTVU cell surface glycoprotein 1 isoform X6 OS=Octopus vulgaris OX=6645 GN=LOC115217577 PE=4 SV=1	835.486	836.094	845	851	KGMPKKF	0.735363	7
>tr|A0A6P7SER3|A0A6P7SER3_OCTVU hemocyanin 1-like OS=Octopus vulgaris OX=6645 GN=LOC115212215 PE=4 SV=2	885.429	886.067	244	250	HKPMEPF	0.734071	7
>tr|A0A6P7SDC4|A0A6P7SDC4_OCTVU hemocyanin G-type, units Oda to Odg OS=Octopus vulgaris OX=6645 GN=LOC115211670 PE=4 SV=2	885.429	886.067	263	269	HKPMEPF	0.734071	7
>Cluster-58773.162319;orf1 len=2921 frame:3 start:24 end:8786 gi|16596797|gb|AAK28276.2| hemocyanin G-type [Enteroctopus dofleini]	885.429	886.067	267	273	HKPMEPF	0.734071	7
>tr|Q9BJ58|Q9BJ58_ENTDO Hemocyanin G-type (Fragment) OS=Enteroctopus dofleini OX=267067 PE=4 SV=2	885.429	886.067	268	274	HKPMEPF	0.734071	7
>sp|O61363|HCYG_ENTDO Hemocyanin G-type, units Oda to Odg OS=Enteroctopus dofleini OX=267067 GN=ODHCY PE=1 SV=1	885.429	886.067	240	246	HKPMEPF	0.734071	7
>tr|A0A0L8FMS3|A0A0L8FMS3_OCTBM VWFC domain-containing protein OS=Octopus bimaculoides OX=37653 GN=OCBIM_22013879mg PE=4 SV=1	926.375	927.092	877	884	KPTDCPCY	0.732844	8
>Cluster-58773.88130;orf1 len=870 frame:3 start:327 end:2936 gi|762145751|ref|XP_011456155.1| PREDICTED: puromycin-sensitive aminopeptidase-like [Crassostrea gigas]	801.349	801.97	666	671	CRMGRY	0.731801	6
>tr|A0A7E6ETN4|A0A7E6ETN4_OCTVU protein-glutamine gamma-glutamyltransferase K OS=Octopus vulgaris OX=6645 GN=LOC115211974 PE=3 SV=1	1078.54	1079.27	483	491	KQGPQDMKF	0.731793	9
>tr|A0A0L8GUX3|A0A0L8GUX3_OCTBM Uncharacterized protein OS=Octopus bimaculoides OX=37653 GN=OCBIM_22027429mg PE=3 SV=1	1244.71	1245.61	334	344	KGCVMGPRKRI	0.730294	11
>Cluster-58773.83035;orf1 len=470 frame:3 start:477 end:1886 gi|554820859|ref|XP_005921157.1| PREDICTED: thymidine phosphorylase-like isoform X1 [Haplochromis burtoni]	1396.66	1397.8	119	131	CGMKVPMMSGRSL	0.729636	13
>tr|A0A0L8HJ80|A0A0L8HJ80_OCTBM Major vault protein OS=Octopus bimaculoides OX=37653 GN=OCBIM_22013292mg PE=4 SV=1	1156.65	1157.43	510	520	SGGKPKKPNMI	0.729502	11
>tr|A0A0L8HFB4|A0A0L8HFB4_OCTBM Pacifastin domain-containing protein OS=Octopus bimaculoides OX=37653 GN=OCBIM_22015839mg PE=4 SV=1	931.328	932.025	178	185	KDDCNSCF	0.722371	8
>tr|A0A6P7SVM2|A0A6P7SVM2_OCTVU Spectrin beta chain OS=Octopus vulgaris OX=6645 GN=LOC115216977 PE=3 SV=1	2588.14	2589.7	2127	2150	VPPEEPPEPEPEEVVSTEPEDGEA	0.722293	24
>tr|A0A7E6FKU8|A0A7E6FKU8_OCTVU 1,2-dihydroxy-3-keto-5-methylthiopentene dioxygenase OS=Octopus vulgaris OX=6645 GN=LOC115223255 PE=3 SV=1	886.38	887.071	78	84	DNMMKTF	0.721364	7
>tr|A0A6P7SU25|A0A6P7SU25_OCTVU Glucose-6-phosphate isomerase OS=Octopus vulgaris OX=6645 GN=LOC115216343 PE=3 SV=1	809.296	809.944	30	35	HMDEMF	0.721132	6
>tr|A0A6P7SLJ4|A0A6P7SLJ4_OCTVU Alpha-galactosidase OS=Octopus vulgaris OX=6645 GN=LOC115213936 PE=3 SV=1	1451.64	1452.66	263	274	SDNQQKVQMGMW	0.720779	12
>tr|A0A6P7SU25|A0A6P7SU25_OCTVU Glucose-6-phosphate isomerase OS=Octopus vulgaris OX=6645 GN=LOC115216343 PE=3 SV=1	891.432	891.965	36	42	KNDPDRF	0.719865	7
>tr|W6CNR9|W6CNR9_SEPOF Hemocyanin subunit 3 OS=Sepia officinalis OX=6610 PE=2 SV=1	941.43	942.091	372	379	GGKHEMPW	0.718068	8
>tr|A0A7E6FQN6|A0A7E6FQN6_OCTVU insulin-like growth factor-binding protein complex acid labile subunit isoform X7 OS=Octopus vulgaris OX=6645 GN=LOC115225305 PE=4 SV=1	2129.88	2131.51	435	454	QCETCSGMKCKDPKVTNCTA	0.71794	20
>tr|A0A6P7T9M7|A0A6P7T9M7_OCTVU Transgelin OS=Octopus vulgaris OX=6645 GN=LOC115221527 PE=3 SV=1	838.34	838.92	110	117	GVPDNSCF	0.716193	8
>tr|A0A7E6FJ93|A0A7E6FJ93_OCTVU Annexin OS=Octopus vulgaris OX=6645 GN=LOC115223011 PE=3 SV=1	907.536	908.095	268	276	PGGNKPKPL	0.715835	9
>tr|A0A812DI02|A0A812DI02_SEPPH Tubulin beta chain OS=Sepia pharaonis OX=158019 GN=SPHA_52176 PE=3 SV=1	1003.45	1004.12	303	310	CDPRHGRY	0.715563	8
>tr|A0A7E6FJ93|A0A7E6FJ93_OCTVU Annexin OS=Octopus vulgaris OX=6645 GN=LOC115223011 PE=3 SV=1	807.371	807.949	85	92	PGSVMPGY	0.715215	8
>tr|A0A6P7SER3|A0A6P7SER3_OCTVU hemocyanin 1-like OS=Octopus vulgaris OX=6645 GN=LOC115212215 PE=4 SV=2	984.374	985.198	482	490	CCVHGMSTF	0.712209	9
>tr|A0A6P7SDC4|A0A6P7SDC4_OCTVU hemocyanin G-type, units Oda to Odg OS=Octopus vulgaris OX=6645 GN=LOC115211670 PE=4 SV=2	984.374	985.198	501	509	CCVHGMSTF	0.712209	9
>Cluster-58773.162319;orf1 len=2921 frame:3 start:24 end:8786 gi|16596797|gb|AAK28276.2| hemocyanin G-type [Enteroctopus dofleini]	984.374	985.198	505	513	CCVHGMSTF	0.712209	9
>tr|Q9BJ58|Q9BJ58_ENTDO Hemocyanin G-type (Fragment) OS=Enteroctopus dofleini OX=267067 PE=4 SV=2	984.374	985.198	506	514	CCVHGMSTF	0.712209	9
>sp|O61363|HCYG_ENTDO Hemocyanin G-type, units Oda to Odg OS=Enteroctopus dofleini OX=267067 GN=ODHCY PE=1 SV=1	984.374	985.198	477	485	CCVHGMSTF	0.712209	9
>tr|F0V3W2|F0V3W2_LEPCI Hemocyanin (Fragment) OS=Lepidochitona cinerea OX=256056 PE=2 SV=1	1071.41	1072.28	66	75	SCCVHGMSTF	0.712209	10
>tr|A0A6P7T033|A0A6P7T033_OCTVU T-complex protein 1 subunit gamma OS=Octopus vulgaris OX=6645 GN=LOC115218091 PE=3 SV=1	836.426	836.928	538	545	SRPPPPDA	0.711241	8
>tr|A0A6P7SKQ5|A0A6P7SKQ5_OCTVU tropomyosin-2 OS=Octopus vulgaris OX=6645 GN=LOC115213976 PE=3 SV=1	877.289	878.039	204	210	CSQMMDY	0.710228	7
>tr|Q27Q56|Q27Q56_SEPOF Hemocyanin subunit 2 (Fragment) OS=Sepia officinalis OX=6610 PE=2 SV=1	1083.49	1084.2	1860	1870	GGPNPHSMSSL	0.708052	11
>tr|A0A6P7T0G1|A0A6P7T0G1_OCTVU Phosphoglycerate kinase OS=Octopus vulgaris OX=6645 GN=LOC115218470 PE=3 SV=1	1037.42	1038.13	106	115	CSDPEPGSVF	0.704655	10
>tr|A0A6P7SER3|A0A6P7SER3_OCTVU hemocyanin 1-like OS=Octopus vulgaris OX=6645 GN=LOC115212215 PE=4 SV=2	853.376	853.975	1939	1945	SKPEDMF	0.704257	7
>tr|A0A6P7SDC4|A0A6P7SDC4_OCTVU hemocyanin G-type, units Oda to Odg OS=Octopus vulgaris OX=6645 GN=LOC115211670 PE=4 SV=2	853.376	853.975	1958	1964	SKPEDMF	0.704257	7
>Cluster-58773.162319;orf1 len=2921 frame:3 start:24 end:8786 gi|16596797|gb|AAK28276.2| hemocyanin G-type [Enteroctopus dofleini]	853.376	853.975	1962	1968	SKPEDMF	0.704257	7
>tr|Q9BJ58|Q9BJ58_ENTDO Hemocyanin G-type (Fragment) OS=Enteroctopus dofleini OX=267067 PE=4 SV=2	853.376	853.975	1963	1969	SKPEDMF	0.704257	7
>sp|O61363|HCYG_ENTDO Hemocyanin G-type, units Oda to Odg OS=Enteroctopus dofleini OX=267067 GN=ODHCY PE=1 SV=1	853.376	853.975	1934	1940	SKPEDMF	0.704257	7
>tr|A0A7E6EXQ9|A0A7E6EXQ9_OCTVU cytosolic non-specific dipeptidase isoform X2 OS=Octopus vulgaris OX=6645 GN=LOC115213823 PE=3 SV=1	817.435	817.991	157	163	SKNRPCL	0.704249	7
>Cluster-58773.74875;orf1 len=741 frame:2 start:1832 end:4054 gi|159006|gb|AAA16244.1| peroxidase-like protein, partial [Euprymna scolopes]	850.388	850.977	347	353	CRVPDNF	0.704102	7
>tr|A0A6P7SIX4|A0A6P7SIX4_OCTVU Inorganic diphosphatase OS=Octopus vulgaris OX=6645 GN=LOC115213471 PE=3 SV=2	811.365	811.938	353	359	EKSMPGF	0.704026	7
>tr|A0A0L8HS70|A0A0L8HS70_OCTBM XPGN domain-containing protein OS=Octopus bimaculoides OX=37653 GN=OCBIM_22007405mg PE=3 SV=1	1232.58	1233.4	150	159	SSKPHQRDMF	0.702062	10
>tr|A0A7E6FLF6|A0A7E6FLF6_OCTVU leukotriene A-4 hydrolase-like OS=Octopus vulgaris OX=6645 GN=LOC115223638 PE=3 SV=1	1176.57	1177.37	133	143	VPCQDSPGVKF	0.700311	11
>tr|A0A6P7TPR7|A0A6P7TPR7_OCTVU uncharacterized protein LOC115224696 OS=Octopus vulgaris OX=6645 GN=LOC115224696 PE=4 SV=2	1855.97	1857.33	353	368	TNSMKCSCKVKKGKKW	0.699404	16
>tr|A0A077B6R8|A0A077B6R8_EUPSC Hemocyanin subunit 1 OS=Euprymna scolopes OX=6613 GN=HCY1 PE=2 SV=1	912.403	913.049	373	380	GGVHEMPW	0.698608	8
>tr|A0A6P7T4Z8|A0A6P7T4Z8_OCTVU opine dehydrogenase OS=Octopus vulgaris OX=6645 GN=LOC115219799 PE=4 SV=1	1175.52	1176.41	214	223	DSVVHPPMMY	0.698517	10
>tr|A0A6P7SKQ5|A0A6P7SKQ5_OCTVU tropomyosin-2 OS=Octopus vulgaris OX=6645 GN=LOC115213976 PE=3 SV=1	826.322	826.974	106	111	QDMMRY	0.697671	6
>tr|A0A7E6FE51|A0A7E6FE51_OCTVU filamin-A isoform X1 OS=Octopus vulgaris OX=6645 GN=LOC115220251 PE=3 SV=1	803.368	803.855	1370	1376	QRPDGTF	0.697201	7
>tr|A0A6P7TK16|A0A6P7TK16_OCTVU Phosphomannomutase OS=Octopus vulgaris OX=6645 GN=LOC115223856 PE=3 SV=1	808.413	808.984	116	122	PCKRGTF	0.693354	7
>tr|A0A6P7SBT2|A0A6P7SBT2_OCTVU Hydroxyacid-oxoacid transhydrogenase OS=Octopus vulgaris OX=6645 GN=LOC115210878 PE=3 SV=1	971.455	972.183	378	385	MSCPQRHL	0.690238	8
>tr|A0A6P7TFA3|A0A6P7TFA3_OCTVU Polyol dehydrogenase OS=Octopus vulgaris OX=6645 GN=LOC115223465 PE=3 SV=1	969.519	970.186	89	97	VEPGVPCRL	0.690044	9
>tr|A0A6P7TRF4|A0A6P7TRF4_OCTVU catalase OS=Octopus vulgaris OX=6645 GN=LOC115228352 PE=3 SV=1	916.444	917.075	341	348	EPSPDKML	0.688567	8
>tr|A0A6P7T9M7|A0A6P7T9M7_OCTVU Transgelin OS=Octopus vulgaris OX=6645 GN=LOC115221527 PE=3 SV=1	1824.91	1826.1	148	164	SGPVCGPKPTEKHQVNF	0.687481	17
>tr|A0A7E6FQN6|A0A7E6FQN6_OCTVU insulin-like growth factor-binding protein complex acid labile subunit isoform X7 OS=Octopus vulgaris OX=6645 GN=LOC115225305 PE=4 SV=1	1394.53	1395.65	376	387	GNNKDMMCECHL	0.686818	12
>Cluster-58773.89511;orf1 len=572 frame:2 start:377 end:2092 gi|524875173|ref|XP_005094317.1| PREDICTED: alpha-aminoadipic semialdehyde dehydrogenase-like [Aplysia californica]	815.36	815.926	392	399	GDPMEPGI	0.686811	8
>tr|A0A812CBN1|A0A812CBN1_SEPPH Uncharacterized protein OS=Sepia pharaonis OX=158019 GN=SPHA_33848 PE=4 SV=1	805.33	805.893	2142	2148	GGQHEMF	0.686422	7
>tr|W6CNR9|W6CNR9_SEPOF Hemocyanin subunit 3 OS=Sepia officinalis OX=6610 PE=2 SV=1	805.33	805.893	3271	3277	GGQHEMF	0.686422	7
>tr|A0A812CD65|A0A812CD65_SEPPH Uncharacterized protein OS=Sepia pharaonis OX=158019 GN=SPHA_33819 PE=4 SV=1	805.33	805.893	2861	2867	GGQHEMF	0.686422	7
>Cluster-58773.136028;orf1 len=262 frame:2 start:116 end:901 gi|291233326|ref|XP_002736601.1| PREDICTED: UPF0462 protein C4orf33 homolog [Saccoglossus kowalevskii]	2534.29	2535.76	44	65	PTKNSSTSQQRGQVNRPENHRL	0.686016	22
>tr|A0A6P7SYN9|A0A6P7SYN9_OCTVU barrier-to-autointegration factor B OS=Octopus vulgaris OX=6645 GN=LOC115217368 PE=4 SV=1	853.399	853.981	72	78	KQGRDCF	0.683787	7
>tr|A0A812CD65|A0A812CD65_SEPPH Uncharacterized protein OS=Sepia pharaonis OX=158019 GN=SPHA_33819 PE=4 SV=1	981.355	982.088	2031	2039	DQCGMGSHF	0.678811	9
>tr|A0A812CYT6|A0A812CYT6_SEPPH MYH OS=Sepia pharaonis OX=158019 GN=SPHA_42230 PE=3 SV=1	1039.55	1040.24	612	620	GSRTRKGMF	0.678199	9
>Cluster-58773.127031;orf1 len=154 frame:-3 start:549 end:88 gi|405978782|gb|EKC43144.1| Nucleoside diphosphate kinase B [Crassostrea gigas]	942.417	943.138	22	29	CGEVMTRF	0.67757	8
>tr|A0A077B6R8|A0A077B6R8_EUPSC Hemocyanin subunit 1 OS=Euprymna scolopes OX=6613 GN=HCY1 PE=2 SV=1	876.465	877.1	3178	3184	KKPMEPF	0.676706	7
>tr|A0A7E6FE51|A0A7E6FE51_OCTVU filamin-A isoform X1 OS=Octopus vulgaris OX=6645 GN=LOC115220251 PE=3 SV=1	953.553	954.124	159	167	GGPTPKQRL	0.676423	9
>tr|A0A077B6R8|A0A077B6R8_EUPSC Hemocyanin subunit 1 OS=Euprymna scolopes OX=6613 GN=HCY1 PE=2 SV=1	857.43	858.013	258	265	PTRPNCGL	0.676227	8
>tr|A0A0L8GUX3|A0A0L8GUX3_OCTBM Uncharacterized protein OS=Octopus bimaculoides OX=37653 GN=OCBIM_22027429mg PE=3 SV=1	805.414	805.983	1	6	MSHRKF	0.676055	6
>tr|A0A6P7SER3|A0A6P7SER3_OCTVU hemocyanin 1-like OS=Octopus vulgaris OX=6645 GN=LOC115212215 PE=4 SV=2	864.356	864.958	2017	2024	GGSTEMPW	0.676037	8
>tr|A0A6P7SDC4|A0A6P7SDC4_OCTVU hemocyanin G-type, units Oda to Odg OS=Octopus vulgaris OX=6645 GN=LOC115211670 PE=4 SV=2	864.356	864.958	2036	2043	GGSTEMPW	0.676037	8
>Cluster-58773.162319;orf1 len=2921 frame:3 start:24 end:8786 gi|16596797|gb|AAK28276.2| hemocyanin G-type [Enteroctopus dofleini]	864.356	864.958	2040	2047	GGSTEMPW	0.676037	8
>tr|Q9BJ58|Q9BJ58_ENTDO Hemocyanin G-type (Fragment) OS=Enteroctopus dofleini OX=267067 PE=4 SV=2	864.356	864.958	2041	2048	GGSTEMPW	0.676037	8
>sp|O61363|HCYG_ENTDO Hemocyanin G-type, units Oda to Odg OS=Enteroctopus dofleini OX=267067 GN=ODHCY PE=1 SV=1	864.356	864.958	2013	2020	GGSTEMPW	0.676037	8
>tr|A0A077B6R8|A0A077B6R8_EUPSC Hemocyanin subunit 1 OS=Euprymna scolopes OX=6613 GN=HCY1 PE=2 SV=1	864.356	864.958	2457	2464	GGSTEMPW	0.676037	8
>tr|A0A0L8HJ80|A0A0L8HJ80_OCTBM Major vault protein OS=Octopus bimaculoides OX=37653 GN=OCBIM_22013292mg PE=4 SV=1	839.281	839.929	346	352	CSCNEHF	0.674144	7
>tr|A0A7E6EY74|A0A7E6EY74_OCTVU twitchin OS=Octopus vulgaris OX=6645 GN=LOC115213975 PE=3 SV=1	1209.7	1210.47	641	651	PPKVKGDPPKF	0.672424	11
>tr|A0A6P7SUD6|A0A6P7SUD6_OCTVU 6-phosphogluconolactonase OS=Octopus vulgaris OX=6645 GN=LOC115216558 PE=3 SV=2	1074.43	1075.21	148	158	GMGPDGHTCSL	0.671763	11
>tr|A0A7E6EZI8|A0A7E6EZI8_OCTVU uncharacterized protein LOC115214248 OS=Octopus vulgaris OX=6645 GN=LOC115214248 PE=4 SV=1	1188.48	1189.32	5759	5771	GGGHGGSMCPDTL	0.671561	13
>tr|A0A7E6FD92|A0A7E6FD92_OCTVU insulin-degrading enzyme OS=Octopus vulgaris OX=6645 GN=LOC115219912 PE=3 SV=1	993.402	994.137	56	64	GDMCDPKDL	0.670903	9
>Cluster-58773.147322;orf1 len=499 frame:3 start:3 end:1499 gi|676461383|ref|XP_009055926.1| hypothetical protein LOTGIDRAFT_161773 [Lottia gigantea]>gi|556104570|gb|ESO93222.1| hypothetical protein LOTGIDRAFT_161773 [Lottia gigantea]	966.322	966.921	1	12	GGGDGDGSGCNA	0.669987	12
>tr|A0A0L8H1Z7|A0A0L8H1Z7_OCTBM CN hydrolase domain-containing protein OS=Octopus bimaculoides OX=37653 GN=OCBIM_22024094mg PE=4 SV=1	1031.49	1032.12	234	241	GRHHPQNW	0.667765	8
>tr|A0A6P7SWF0|A0A6P7SWF0_OCTVU probable methylmalonate-semialdehyde dehydrogenase [acylating], mitochondrial OS=Octopus vulgaris OX=6645 GN=LOC115217127 PE=3 SV=1	823.388	823.955	499	505	GRQGMQF	0.66509	7
>tr|A0A6P7UBL9|A0A6P7UBL9_OCTVU fatty-acid amide hydrolase 2 isoform X2 OS=Octopus vulgaris OX=6645 GN=LOC115232529 PE=3 SV=1	823.325	823.862	201	210	GGSSGGEGCL	0.6649	10
>tr|A0A6P7STJ4|A0A6P7STJ4_OCTVU Carboxylic ester hydrolase OS=Octopus vulgaris OX=6645 GN=LOC115216415 PE=3 SV=1	1983.74	1985.04	493	511	SKSGNPNNGDCSDCSSEPW	0.663344	19
>Cluster-58773.148525;orf1 len=812 frame:2 start:422 end:2857 gi|676447145|ref|XP_009051312.1| hypothetical protein LOTGIDRAFT_201834 [Lottia gigantea]>gi|556109335|gb|ESO97987.1| hypothetical protein LOTGIDRAFT_201834 [Lottia gigantea]	841.387	841.967	637	644	SGTGNMKF	0.66259	8
>tr|A0A0L8GIJ0|A0A0L8GIJ0_OCTBM VWFA domain-containing protein (Fragment) OS=Octopus bimaculoides OX=37653 GN=OCBIM_22032938mg PE=4 SV=1	1738.61	1740.1	226	240	QKMCGEECMCCTQVY	0.662217	15
>tr|A0A6P7SDC4|A0A6P7SDC4_OCTVU hemocyanin G-type, units Oda to Odg OS=Octopus vulgaris OX=6645 GN=LOC115211670 PE=4 SV=2	993.438	994.181	73	82	PDGSTVVCCL	0.659001	10
>Cluster-58773.162319;orf1 len=2921 frame:3 start:24 end:8786 gi|16596797|gb|AAK28276.2| hemocyanin G-type [Enteroctopus dofleini]	993.438	994.181	77	86	PDGSTVVCCL	0.659001	10
>tr|Q9BJ58|Q9BJ58_ENTDO Hemocyanin G-type (Fragment) OS=Enteroctopus dofleini OX=267067 PE=4 SV=2	993.438	994.181	78	87	PDGSTVVCCL	0.659001	10
>sp|O61363|HCYG_ENTDO Hemocyanin G-type, units Oda to Odg OS=Enteroctopus dofleini OX=267067 GN=ODHCY PE=1 SV=1	993.438	994.181	50	59	PDGSTVVCCL	0.659001	10
>tr|A0A6P7SPL2|A0A6P7SPL2_OCTVU glycogenin-1 isoform X2 OS=Octopus vulgaris OX=6645 GN=LOC115215187 PE=4 SV=1	985.401	985.991	238	246	PNSGHDPDF	0.658705	9
>tr|A0A6P7SWF0|A0A6P7SWF0_OCTVU probable methylmalonate-semialdehyde dehydrogenase [acylating], mitochondrial OS=Octopus vulgaris OX=6645 GN=LOC115217127 PE=3 SV=1	913.402	914.1	100	106	TRQQCMF	0.658416	7
>tr|A0A7E6EY74|A0A7E6EY74_OCTVU twitchin OS=Octopus vulgaris OX=6645 GN=LOC115213975 PE=3 SV=1	1316.73	1317.54	2440	2452	GPGKPSKTTPPHL	0.657029	13
>tr|W6CNR9|W6CNR9_SEPOF Hemocyanin subunit 3 OS=Sepia officinalis OX=6610 PE=2 SV=1	886.376	887.008	268	274	HEPMEPF	0.655427	7
>tr|A0A812CD65|A0A812CD65_SEPPH Uncharacterized protein OS=Sepia pharaonis OX=158019 GN=SPHA_33819 PE=4 SV=1	886.376	887.008	270	276	HEPMEPF	0.655427	7
>Cluster-58773.190283;orf1 len=447 frame:2 start:353 end:1693 gi|617418760|ref|XP_007557771.1| PREDICTED: deoxynucleoside triphosphate triphosphohydrolase SAMHD1-like [Poecilia formosa]	1806.96	1808.19	369	385	KGTCKVGKDQGKKEGML	0.654764	17
>tr|A0A6P7SYF3|A0A6P7SYF3_OCTVU retinal dehydrogenase 1 OS=Octopus vulgaris OX=6645 GN=LOC115217862 PE=3 SV=1	978.435	979.106	453	461	NSVCPQSPF	0.652818	9
>tr|A0A0L8G0N4|A0A0L8G0N4_OCTBM Prolyl endopeptidase OS=Octopus bimaculoides OX=37653 GN=OCBIM_22003476mg PE=3 SV=1	1300.6	1301.43	274	285	SPNEGCDPVNRL	0.652554	12
>tr|A0A6P7SZG0|A0A6P7SZG0_OCTVU cAMP-regulated phosphoprotein 19 OS=Octopus vulgaris OX=6645 GN=LOC115217970 PE=3 SV=1	1363.75	1364.66	137	148	PPKKPHCQTSKL	0.651934	12
>tr|A0A6P7TGG8|A0A6P7TGG8_OCTVU Gamma-cystathionase OS=Octopus vulgaris OX=6645 GN=LOC115223921 PE=3 SV=1	922.504	923.135	301	307	KRQMRGF	0.651041	7
>tr|A0A6P7TGG8|A0A6P7TGG8_OCTVU Gamma-cystathionase OS=Octopus vulgaris OX=6645 GN=LOC115223921 PE=3 SV=1	1204.59	1205.35	59	69	SRSGNPTRNCL	0.650809	11
>tr|A0A6P7SGA6|A0A6P7SGA6_OCTVU Clathrin heavy chain OS=Octopus vulgaris OX=6645 GN=LOC115212844 PE=3 SV=1	1092.47	1093.1	886	894	DSNNNPERF	0.649951	9
>tr|A0A7E6FRZ6|A0A7E6FRZ6_OCTVU hemocyanin G-type, units Oda to Odg-like OS=Octopus vulgaris OX=6645 GN=LOC115225590 PE=4 SV=1	805.366	805.936	2860	2866	GGKHEMF	0.649029	7
>tr|A0A6P7T656|A0A6P7T656_OCTVU Aconitate hydratase, mitochondrial OS=Octopus vulgaris OX=6645 GN=LOC115219777 PE=3 SV=1	896.426	896.984	347	354	EPHVNGPF	0.648198	8
>tr|A0A7E6FD92|A0A7E6FD92_OCTVU insulin-degrading enzyme OS=Octopus vulgaris OX=6645 GN=LOC115219912 PE=3 SV=1	899.448	899.99	719	725	PHSQQRF	0.647361	7
>tr|A0A7E6FRZ6|A0A7E6FRZ6_OCTVU hemocyanin G-type, units Oda to Odg-like OS=Octopus vulgaris OX=6645 GN=LOC115225590 PE=4 SV=1	858.381	858.997	268	274	HTPMEPF	0.647175	7
>tr|A0A0L8IEQ2|A0A0L8IEQ2_OCTBM T-complex protein 1 subunit delta OS=Octopus bimaculoides OX=37653 GN=OCBIM_22015514mg PE=3 SV=1	1004.5	1005.25	44	52	GPRGMDKMI	0.645947	9
>tr|A0A6P7SJ72|A0A6P7SJ72_OCTVU Glutamine--fructose-6-phosphate transaminase (isomerizing) OS=Octopus vulgaris OX=6645 GN=LOC115213781 PE=4 SV=1	859.515	860.081	370	375	RRCRRL	0.645491	6
>tr|Q27Q56|Q27Q56_SEPOF Hemocyanin subunit 2 (Fragment) OS=Sepia officinalis OX=6610 PE=2 SV=1	1100.55	1101.21	579	588	KQPSKGDHGF	0.64526	10
>tr|A0A7E6FIQ7|A0A7E6FIQ7_OCTVU uncharacterized protein LOC115221679 isoform X1 OS=Octopus vulgaris OX=6645 GN=LOC115221679 PE=4 SV=1	1161.54	1162.32	106	115	PSDNNVVKCW	0.644485	10
>tr|A0A7E6FR50|A0A7E6FR50_OCTVU NADH-cytochrome b5 reductase OS=Octopus vulgaris OX=6645 GN=LOC115224390 PE=3 SV=1	918.454	918.993	38	44	SHDTRRF	0.644252	7
>tr|A0A7E6EY74|A0A7E6EY74_OCTVU twitchin OS=Octopus vulgaris OX=6645 GN=LOC115213975 PE=3 SV=1	943.379	944.145	4792	4800	GRTSCCCTL	0.644223	9
>tr|A0A0L8I420|A0A0L8I420_OCTBM Uncharacterized protein (Fragment) OS=Octopus bimaculoides OX=37653 GN=OCBIM_22037121mg PE=3 SV=1	1531.86	1532.87	92	104	NGVHPRPRKVMQL	0.643915	13
>tr|A0A077B6R8|A0A077B6R8_EUPSC Hemocyanin subunit 1 OS=Euprymna scolopes OX=6613 GN=HCY1 PE=2 SV=1	806.379	806.858	276	282	GRDTNPF	0.643449	7
>tr|A0A7E6FRZ6|A0A7E6FRZ6_OCTVU hemocyanin G-type, units Oda to Odg-like OS=Octopus vulgaris OX=6645 GN=LOC115225590 PE=4 SV=1	960.472	961.137	372	379	GGKREMPW	0.642939	8
>tr|A0A0L8HXN5|A0A0L8HXN5_OCTBM SGL domain-containing protein OS=Octopus bimaculoides OX=37653 GN=OCBIM_22003174mg PE=4 SV=1	1117.58	1118.35	207	216	PGCVSNKKVW	0.641837	10
>Cluster-58773.179191;orf1 len=448 frame:1 start:25 end:1368 gi|260818781|ref|XP_002604561.1| hypothetical protein BRAFLDRAFT_280591 [Branchiostoma floridae]>gi|229289888|gb|EEN60572.1| hypothetical protein BRAFLDRAFT_280591 [Branchiostoma floridae]	895.401	896.078	277	284	GDMSMKNL	0.640854	8
>tr|A0A812DI02|A0A812DI02_SEPPH Tubulin beta chain OS=Sepia pharaonis OX=158019 GN=SPHA_52176 PE=3 SV=1	894.399	894.985	140	150	GGGTGSGMGTL	0.640842	11
>Cluster-58773.217011;orf1 len=333 frame:3 start:348 end:1346 gi|762104009|ref|XP_011434531.1| PREDICTED: prostaglandin reductase 1-like [Crassostrea gigas]>gi|405958743|gb|EKC24838.1| Prostaglandin reductase 1 [Crassostrea gigas]	909.41	910.174	236	244	GRVCVCGCI	0.639006	9
>tr|A0A0L8GLX8|A0A0L8GLX8_OCTBM S-formylglutathione hydrolase OS=Octopus bimaculoides OX=37653 GN=OCBIM_22031609mg PE=3 SV=1	801.363	802.008	28	33	KCEMKF	0.638924	6
>Cluster-58773.179191;orf1 len=448 frame:1 start:25 end:1368 gi|260818781|ref|XP_002604561.1| hypothetical protein BRAFLDRAFT_280591 [Branchiostoma floridae]>gi|229289888|gb|EEN60572.1| hypothetical protein BRAFLDRAFT_280591 [Branchiostoma floridae]	863.389	863.908	141	148	SGPQDNVF	0.638146	8
>tr|A0A7E6F1S6|A0A7E6F1S6_OCTVU microtubule-associated protein futsch isoform X4 OS=Octopus vulgaris OX=6645 GN=LOC115215514 PE=4 SV=1	833.354	833.841	749	755	DDSRHGF	0.636698	7
>tr|A0A6P7SAW7|A0A6P7SAW7_OCTVU transketolase OS=Octopus vulgaris OX=6645 GN=LOC115210747 PE=4 SV=1	906.479	907.023	109	116	EGHPTPRL	0.636192	8
>tr|Q24925|Q24925_EUPSC Peroxidase-like protein (Fragment) OS=Euprymna scolopes OX=6613 PE=2 SV=1	843.349	844.005	420	426	GRTCMEF	0.63595	7
>tr|Q9BJ58|Q9BJ58_ENTDO Hemocyanin G-type (Fragment) OS=Enteroctopus dofleini OX=267067 PE=4 SV=2	891.403	892.027	1621	1628	GGKSEMPW	0.634589	8
>sp|O61363|HCYG_ENTDO Hemocyanin G-type, units Oda to Odg OS=Enteroctopus dofleini OX=267067 GN=ODHCY PE=1 SV=1	891.403	892.027	1592	1599	GGKSEMPW	0.634589	8
>tr|A0A7E6FJ93|A0A7E6FJ93_OCTVU Annexin OS=Octopus vulgaris OX=6645 GN=LOC115223011 PE=3 SV=1	970.463	971.064	221	229	PPQPSQPGY	0.634554	9
>tr|A0A077B6R8|A0A077B6R8_EUPSC Hemocyanin subunit 1 OS=Euprymna scolopes OX=6613 GN=HCY1 PE=2 SV=1	937.365	938.078	3259	3266	CHNGKCEF	0.63432	8
>tr|A0A7E6EZI8|A0A7E6EZI8_OCTVU uncharacterized protein LOC115214248 OS=Octopus vulgaris OX=6645 GN=LOC115214248 PE=4 SV=1	1261.6	1262.5	398	408	CETPKTNCRPL	0.634313	11
>tr|A0A812DBA1|A0A812DBA1_SEPPH RP-S27Ae OS=Sepia pharaonis OX=158019 GN=SPHA_48671 PE=3 SV=1	853.453	853.959	37	43	PPDQQRL	0.633522	7
>tr|A0A0L8G0N4|A0A0L8G0N4_OCTBM Prolyl endopeptidase OS=Octopus bimaculoides OX=37653 GN=OCBIM_22003476mg PE=3 SV=1	809.386	809.965	132	138	KSEPCVF	0.632443	7
>tr|A0A6P7SJV4|A0A6P7SJV4_OCTVU S-(hydroxymethyl)glutathione dehydrogenase OS=Octopus vulgaris OX=6645 GN=LOC115213890 PE=3 SV=1	846.356	846.946	283	289	ESCHKGW	0.632431	7
>tr|A0A6P7TGU1|A0A6P7TGU1_OCTVU actin-interacting protein 1 isoform X1 OS=Octopus vulgaris OX=6645 GN=LOC115223147 PE=4 SV=1	1065.47	1066.29	170	179	SVVMCEGPPF	0.632097	10
>tr|A0A6P7SEM8|A0A6P7SEM8_OCTVU Alpha-mannosidase OS=Octopus vulgaris OX=6645 GN=LOC115211875 PE=3 SV=1	800.379	801.023	1	6	MMTRVF	0.630834	6
>tr|A0A6P7SHI1|A0A6P7SHI1_OCTVU Malate dehydrogenase OS=Octopus vulgaris OX=6645 GN=LOC115212957 PE=3 SV=1	965.44	966.107	215	223	SQCTPPVSF	0.630527	9
>tr|A0A0L8GC35|A0A0L8GC35_OCTBM N-acyl-L-amino-acid amidohydrolase OS=Octopus bimaculoides OX=37653 GN=OCBIM_22036825mg PE=3 SV=1	1178.49	1179.36	86	95	DVVPVDMDCW	0.630307	10
>tr|A0A6P7TSR4|A0A6P7TSR4_OCTVU Carboxypeptidase OS=Octopus vulgaris OX=6645 GN=LOC115226095 PE=3 SV=1	1224.43	1225.37	234	245	SSCCGSNTTVCY	0.629895	12
>Cluster-58773.130155;orf1 len=534 frame:1 start:1 end:1602 gi|871256270|ref|XP_012942267.1| PREDICTED: mucin-3A-like [Aplysia californica]	892.405	892.946	39	47	PPSSSPSSF	0.629204	9
>Cluster-58773.108885;orf1 len=1084 frame:2 start:158 end:3409 gi|667467110|sp|B3EWZ9.1|HEPHL_ACRMI RecName: Full=Hephaestin-like protein; Flags: Precursor [Acropora millepora]	1057.51	1058.25	1051	1059	MVPENPGKW	0.626957	9
>tr|A0A6P7TD81|A0A6P7TD81_OCTVU dipeptidyl peptidase 2 isoform X1 OS=Octopus vulgaris OX=6645 GN=LOC115222860 PE=3 SV=1	842.379	843.058	314	320	VDVTMMF	0.626489	7
>tr|A0A812EMG1|A0A812EMG1_SEPPH DNAH OS=Sepia pharaonis OX=158019 GN=SPHA_78697 PE=4 SV=1	856.423	857.022	986	993	PPSPEKMA	0.625926	8
>tr|A0A6P7TYT0|A0A6P7TYT0_OCTVU Histidine--tRNA ligase OS=Octopus vulgaris OX=6645 GN=LOC115230998 PE=3 SV=2	964.473	965.057	25	33	GDESGPKKF	0.624271	9
>Cluster-58773.174459;orf1 len=349 frame:-1 start:1047 end:1 gi|676459799|ref|XP_009055418.1| hypothetical protein LOTGIDRAFT_153262 [Lottia gigantea]>gi|556105140|gb|ESO93792.1| hypothetical protein LOTGIDRAFT_153262 [Lottia gigantea]	964.473	965.057	50	58	GDESGPKKF	0.624271	9
>Cluster-58773.105280;orf1 len=426 frame:1 start:307 end:1584 gi|827883539|dbj|BAR90777.1| beta arrestin [Idiosepius paradoxus] >Cluster-58773.105276;orf1 len=426 frame:1 start:307 end:1584 gi|827883539|dbj|BAR90777.1| beta arrestin [Idiosepius paradoxus] >tr|A0A6P7SCX4|A0A6P7SCX4_OCTVU beta-arrestin-1 OS=Octopus vulgaris OX=6645 GN=LOC115211741 PE=3 SV=1	1008.47	1009.3	201	209	MMSPGNMKL	0.623912	9
>Cluster-58773.194608;orf1 len=190 frame:3 start:591 end:1160 gi|220683564|gb|ACL80558.1| sodium-calcium exchanger [Doryteuthis pealeii]	857.415	857.947	40	47	HPSSPSVF	0.622777	8
>tr|A0A6P7SAF9|A0A6P7SAF9_OCTVU Proteasome subunit alpha type OS=Octopus vulgaris OX=6645 GN=LOC115210708 PE=3 SV=1	891.366	891.984	155	162	HMDPSGTF	0.622475	8
>tr|A0A6P7TFQ1|A0A6P7TFQ1_OCTVU Tetraspanin OS=Octopus vulgaris OX=6645 GN=LOC115222869 PE=3 SV=1	2094.8	2096.25	163	181	PDSCCESDKGCNESSKDKY	0.622331	19
>tr|A0A0L8I519|A0A0L8I519_OCTBM Sulfotransfer_1 domain-containing protein OS=Octopus bimaculoides OX=37653 GN=OCBIM_22034539mg PE=4 SV=1	832.351	832.913	31	38	GNDGEPML	0.621366	8
>tr|A0A0L8FTG9|A0A0L8FTG9_OCTBM Amine oxidase OS=Octopus bimaculoides OX=37653 GN=OCBIM_22008553mg PE=3 SV=1	919.474	920.022	93	100	SSGHTKRF	0.620072	8
>tr|A0A6P7SXS2|A0A6P7SXS2_OCTVU cell surface glycoprotein 1 isoform X6 OS=Octopus vulgaris OX=6645 GN=LOC115217577 PE=4 SV=1	1462.74	1463.6	672	684	GSQSPSPRSRKEF	0.619516	13
>Cluster-58773.190283;orf1 len=447 frame:2 start:353 end:1693 gi|617418760|ref|XP_007557771.1| PREDICTED: deoxynucleoside triphosphate triphosphohydrolase SAMHD1-like [Poecilia formosa]	3736.85	3739.06	11	39	QNQHTQQQRDHHQQNQQQQQHKRKPHKKF	0.617661	29
>tr|A0A0L8GUX3|A0A0L8GUX3_OCTBM Uncharacterized protein OS=Octopus bimaculoides OX=37653 GN=OCBIM_22027429mg PE=3 SV=1	885.469	886.007	9	16	PRHGSKGF	0.617381	8
>Cluster-58773.109972;orf1 len=856 frame:2 start:89 end:2656 gi|762142591|ref|XP_011454520.1| PREDICTED: inter-alpha-trypsin inhibitor heavy chain H3-like [Crassostrea gigas]	918.454	919.16	634	641	DMGRVMPL	0.616417	8
>tr|Q24925|Q24925_EUPSC Peroxidase-like protein (Fragment) OS=Euprymna scolopes OX=6613 PE=2 SV=1	1591.74	1592.91	506	520	GGDGRVNVQPMMMSL	0.614791	15
>tr|A0A812CYT6|A0A812CYT6_SEPPH MYH OS=Sepia pharaonis OX=158019 GN=SPHA_42230 PE=3 SV=1	1072.54	1073.21	530	538	GHHVNHPKF	0.61394	9
>tr|A0A0L8G0N4|A0A0L8G0N4_OCTBM Prolyl endopeptidase OS=Octopus bimaculoides OX=37653 GN=OCBIM_22003476mg PE=3 SV=1	909.385	910.105	601	608	QVGVMDMF	0.613704	8
[truncated: 8,004 more rows]

## Sheet: Trypsin Digested Peptide (<0.5)
Trypsin Digested Peptides (Peptide Ranker Values <0.50)
0.49985 GACKPSYK
0.499395 HPSLSLHGIEGAFSEPGAK
0.499236 ANNCEFPSIVSLQIQK
0.499236 ANNCEFPSIVSLQIQK
0.498804 LSQRPDFK
[truncated: 12,461 more rows]

## Sheet: Pepsin Digested Peptide (<0.5)
Pepsin Digested Peptides (Peptide Ranker Values <0.50)
[truncated: 7,752 more rows]
